# Supplementary material
Source: PubMed Central journal article supplement (PMC3136804)
Supplement: NIHMS210118-supplement-3.pdf [file NIHMS210118-supplement-3.pdf]

**Supplementary Table 3.** Significantly perturbed genes and proteins following *ex vivo* stimulation of whole blood by LPS or GM+I.

**Gene expression significantly perturbed in response to LPS (fold change = LPS/Control)**

| Probeset ID | Gene Symbol     | Gene ID | Gene Name                                                                                                                         | Fold Change = | q-value (%) |
|-------------|-----------------|---------|-----------------------------------------------------------------------------------------------------------------------------------|---------------|-------------|
| 219577_s_at | <b>ABCA7</b>    | 10347   | ATP-binding cassette, sub-family A (ABC1), member 7                                                                               | -4.56         | 0.22        |
| 202804_at   | <b>ABCC1</b>    | 4363    | ATP-binding cassette, sub-family C (CFTR/MRP), member 1                                                                           | 4.15          | 0.00        |
| 226363_at   | <b>ABCC5</b>    | 10057   | ATP-binding cassette, sub-family C (CFTR/MRP), member 5                                                                           | -12.76        | 0.06        |
| 200045_at   | <b>ABCF1</b>    | 23      | ATP-binding cassette, sub-family F (GCN20), member 1                                                                              | 7.79          | 0.00        |
| 211113_s_at | <b>ABCG1</b>    | 9619    | ATP-binding cassette, sub-family G (WHITE), member 1                                                                              | -2.57         | 0.10        |
| 237974_at   | <b>ABHD12B</b>  | 145447  | abhydrolase domain containing 12B                                                                                                 | -9.90         | 0.13        |
| 228490_at   | <b>ABHD2</b>    | 11057   | abhydrolase domain containing 2                                                                                                   | -4.72         | 0.00        |
| 213017_at   | <b>ABHD3</b>    | 171586  | abhydrolase domain containing 3                                                                                                   | -7.99         | 0.03        |
| 218739_at   | <b>ABHD5</b>    | 51099   | abhydrolase domain containing 5                                                                                                   | -4.79         | 0.00        |
| 239579_at   | <b>ABHD7</b>    | 253152  | abhydrolase domain containing 7                                                                                                   | 2.79          | 0.22        |
| 227631_at   | <b>ABI2</b>     | 10152   | Abl interactor 2                                                                                                                  | 2.47          | 0.37        |
| 231907_at   | <b>ABL2</b>     | 27      | v-abl Abelson murine leukemia viral oncogene homolog 2 (arg, Abelson-related gene) ankyrin repeat and BTB (POZ) domain containing | 2.12          | 0.37        |
| 229164_s_at | <b>ABTB1</b>    | 80325   | 1                                                                                                                                 | -7.27         | 0.00        |
| 209608_s_at | <b>ACAT2</b>    | 39      | acetyl-Coenzyme A acetyltransferase 2 (acetoacetyl Coenzyme A thiolase)                                                           | 4.82          | 0.58        |
| 225317_at   | <b>ACBD6</b>    | 84320   | acyl-Coenzyme A binding domain containing 6                                                                                       | 2.91          | 0.00        |
| 201128_s_at | <b>ACLY</b>     | 47      | ATP citrate lyase                                                                                                                 | -4.01         | 0.22        |
| 216103_at   | <b>ACOT11</b>   | 26027   | acyl-CoA thioesterase 11                                                                                                          | 2.15          | 0.22        |
| 221641_s_at | <b>ACOT9</b>    | 23597   | acyl-CoA thioesterase 9                                                                                                           | 2.72          | 0.00        |
| 227962_at   | <b>ACOX1</b>    | 51      | acyl-Coenzyme A oxidase 1, palmitoyl                                                                                              | -6.34         | 0.03        |
| 215227_x_at | <b>ACP1</b>     | 52      | acid phosphatase 1, soluble                                                                                                       | -6.62         | 0.06        |
| 222592_s_at | <b>ACSL5</b>    | 51703   | acyl-CoA synthetase long-chain family member 5                                                                                    | 51.52         | 0.00        |
| 208636_at   | <b>ACTN1</b>    | 87      | actinin, alpha 1                                                                                                                  | -2.13         | 0.00        |
| 203861_s_at | <b>ACTN2</b>    | 88      | actinin, alpha 2                                                                                                                  | -2.87         | 0.10        |
| 200601_at   | <b>ACTN4</b>    | 81      | actinin, alpha 4                                                                                                                  | -3.03         | 0.22        |
| 205209_at   | <b>ACVR1B</b>   | 91      | activin A receptor, type IB                                                                                                       | 2.08          | 0.37        |
| 214895_s_at | <b>ADAM10</b>   | 102     | ADAM metalloproteinase domain 10                                                                                                  | -2.42         | 0.37        |
| 205745_x_at | <b>ADAM17</b>   | 6868    | ADAM metalloproteinase domain 17 (tumor necrosis factor, alpha, converting enzyme)                                                | 2.04          | 0.00        |
| 209765_at   | <b>ADAM19</b>   | 8728    | ADAM metalloproteinase domain 19 (meltrin beta)                                                                                   | -16.31        | 0.00        |
| 206134_at   | <b>ADAMDEC1</b> | 27299   | ADAM-like, decysin 1                                                                                                              | 68.83         | 0.10        |
| 219384_s_at | <b>ADAT1</b>    | 23536   | adenosine deaminase, tRNA-specific 1                                                                                              | 2.41          | 0.37        |
| 235049_at   | <b>ADCY1</b>    | 107     | adenylate cyclase 1 (brain)                                                                                                       | 2.14          | 0.22        |
| 206281_at   | <b>ADCYAP1</b>  | 116     | adenylate cyclase activating polypeptide 1 (pituitary)                                                                            | 3.00          | 0.10        |
| 214736_s_at | <b>ADD1</b>     | 118     | adducin 1 (alpha)                                                                                                                 | -2.38         | 0.37        |
| 201752_s_at | <b>ADD3</b>     | 120     | adducin 3 (gamma)                                                                                                                 | -9.60         | 0.00        |
| 209122_at   | <b>ADFP</b>     | 123     | adipose differentiation-related protein alcohol dehydrogenase 5 (class III), chi                                                  | 9.01          | 0.22        |
| 208848_at   | <b>ADH5</b>     | 128     | polypeptide                                                                                                                       | 2.03          | 0.22        |
| 222400_s_at | <b>ADI1</b>     | 55256   | acireductone dioxygenase 1                                                                                                        | -3.37         | 0.37        |
| 203322_at   | <b>ADNP2</b>    | 22850   | ADNP homeobox 2                                                                                                                   | 3.89          | 0.06        |
| 205013_s_at | <b>ADORA2A</b>  | 135     | adenosine A2a receptor                                                                                                            | 14.50         | 0.00        |

|             |                  |                                                                                                               |        |      |
|-------------|------------------|---------------------------------------------------------------------------------------------------------------|--------|------|
| 228042_at   | <b>ADPRH</b>     | 141 ADP-ribosylarginine hydrolase                                                                             | 6.18   | 0.13 |
| 206170_at   | <b>ADRB2</b>     | 154 adrenergic, beta-2-, receptor, surface                                                                    | -8.09  | 0.03 |
| 243487_at   | <b>AFF4</b>      | 27125 AF4/FMR2 family, member 4                                                                               | 3.61   | 0.03 |
| 217939_s_at | <b>AFTPH</b>     | 54812 aftiphilin<br>1-acylglycerol-3-phosphate O-acyltransferase 6                                            | 2.21   | 0.03 |
| 224776_at   | <b>AGPAT6</b>    | 137964 (lysophosphatidic acid acyltransferase, zeta)                                                          | 3.04   | 0.03 |
| 204500_s_at | <b>AGTPBP1</b>   | 23287 ATP/GTP binding protein 1                                                                               | -5.86  | 0.00 |
| 210327_s_at | <b>AGXT</b>      | 189 alanine-glyoxylate aminotransferase                                                                       | 3.25   | 0.37 |
| 214766_s_at | <b>AHCTF1</b>    | 25909 AT hook containing transcription factor 1                                                               | -11.55 | 0.00 |
| 215051_x_at | <b>AIF1</b>      | 199 allograft inflammatory factor 1                                                                           | -2.54  | 0.00 |
| 223136_at   | <b>AIG1</b>      | 51390 androgen-induced 1                                                                                      | 4.35   | 0.37 |
|             | <b>AK3L1 ///</b> | 205 ///<br>adenylate kinase 3-like 1 ///<br>adenylate kinase 3-                                               |        |      |
|             | <b>AK3L2 ///</b> | 387851 ///<br>like 2 ///<br>similar to Adenylate kinase isoenzyme 4,                                          |        |      |
| 204348_s_at | <b>LOC645619</b> | 645619 mitochondrial (ATP-AMP transphosphorylase)                                                             | 33.07  | 0.13 |
| 205045_at   | <b>AKAP10</b>    | 11216 A kinase (PRKA) anchor protein 10                                                                       | -2.48  | 0.37 |
| 222024_s_at | <b>AKAP13</b>    | 11214 A kinase (PRKA) anchor protein 13                                                                       | -2.02  | 0.03 |
|             | <b>AKAP2 ///</b> |                                                                                                               |        |      |
|             | <b>PALM2-</b>    | 11217 ///<br>A kinase (PRKA) anchor protein 2 ///<br>PALM2-                                                   |        |      |
| 202759_s_at | <b>AKAP2</b>     | 445815 AKAP2 protein                                                                                          | 2.44   | 0.22 |
| 225701_at   | <b>AKNA</b>      | 80709 AT-hook transcription factor<br>aldo-keto reductase family 1, member A1                                 | -2.61  | 0.00 |
| 201900_s_at | <b>AKR1A1</b>    | 10327 (aldehyde reductase)                                                                                    | 10.42  | 0.00 |
| 207163_s_at | <b>AKT1</b>      | 207 v-akt murine thymoma viral oncogene homolog 1                                                             | -15.12 | 0.37 |
| 218373_at   | <b>AKTIP</b>     | 64400 AKT interacting protein                                                                                 | -9.94  | 0.00 |
| 201952_at   | <b>ALCAM</b>     | 214 activated leukocyte cell adhesion molecule                                                                | 2.31   | 0.37 |
| 201612_at   | <b>ALDH9A1</b>   | 223 aldehyde dehydrogenase 9 family, member A1                                                                | -4.62  | 0.00 |
| 208212_s_at | <b>ALK</b>       | 238 anaplastic lymphoma kinase (Ki-1)                                                                         | 3.68   | 0.58 |
| 207381_at   | <b>ALOX12B</b>   | 242 arachidonate 12-lipoxygenase, 12R type                                                                    | 2.52   | 0.22 |
| 207328_at   | <b>ALOX15</b>    | 246 arachidonate 15-lipoxygenase                                                                              | -3.44  | 0.37 |
| 204446_s_at | <b>ALOX5</b>     | 240 arachidonate 5-lipoxygenase                                                                               | -5.18  | 0.03 |
| 215783_s_at | <b>ALPL</b>      | 249 alkaline phosphatase, liver/bone/kidney                                                                   | -18.17 | 0.00 |
| 204664_at   | <b>ALPP</b>      | 250 alkaline phosphatase, placental (Regan isozyme)<br>amyotrophic lateral sclerosis 2 (juvenile)             | 6.11   | 0.22 |
| 226431_at   | <b>ALS2CR13</b>  | 150864 chromosome region, candidate 13<br>amyotrophic lateral sclerosis 2 (juvenile)                          | -17.74 | 0.58 |
| 1553956_at  | <b>ALS2CR4</b>   | 65062 chromosome region, candidate 4<br>adhesion molecule, interacts with CXADR antigen                       | 2.22   | 0.22 |
| 228094_at   | <b>AMICA1</b>    | 120425 1<br>Alport syndrome, mental retardation, midface<br>hypoplasia and elliptocytosis chromosomal region, | -7.77  | 0.00 |
| 204976_s_at | <b>AMMECR1</b>   | 9949 gene 1<br>APC11 anaphase promoting complex subunit 11                                                    | -4.58  | 0.58 |
| 224010_at   | <b>ANAPC11</b>   | 51529 homolog (yeast)                                                                                         | 3.02   | 0.06 |
| 237316_at   | <b>ANKDD1A</b>   | 348094 ankyrin repeat and death domain containing 1A                                                          | 9.04   | 0.03 |
| 228356_at   | <b>ANKRD11</b>   | 29123 ankyrin repeat domain 11                                                                                | -3.21  | 0.10 |
| 1565832_at  | <b>ANKRD15</b>   | 23189 Ankyrin repeat domain 15                                                                                | 3.51   | 0.10 |
| 231423_s_at | <b>ANKRD16</b>   | 54522 ankyrin repeat domain 16                                                                                | 2.64   | 0.00 |
| 238439_at   | <b>ANKRD22</b>   | 118932 ankyrin repeat domain 22                                                                               | 6.01   | 0.00 |
| 225731_at   | <b>ANKRD50</b>   | 57182 ankyrin repeat domain 50<br>ankyrin repeat and sterile alpha motif domain                               | -3.27  | 0.00 |
| 238626_at   | <b>ANKS6</b>     | 203286 containing 6<br>ankyrin repeat and zinc finger domain containing                                       | -3.03  | 0.03 |
| 218274_s_at | <b>ANKZF1</b>    | 55139 1                                                                                                       | -6.85  | 0.10 |

|              |                   |                                                                                                                        |        |      |
|--------------|-------------------|------------------------------------------------------------------------------------------------------------------------|--------|------|
|              |                   | alanyl (membrane) aminopeptidase<br>(aminopeptidase N, aminopeptidase M,<br>290 microsomal aminopeptidase, CD13, p150) | -2.32  | 0.22 |
| 202888_s_at  | <b>ANPEP</b>      |                                                                                                                        |        |      |
| 214783_s_at  | <b>ANXA11</b>     | 311 annexin A11                                                                                                        | -11.43 | 0.03 |
| 208816_x_at  | <b>ANXA2P2</b>    | 304 annexin A2 pseudogene 2                                                                                            | 3.99   | 0.58 |
| 209369_at    | <b>ANXA3</b>      | 306 annexin A3                                                                                                         | -7.17  | 0.06 |
| 200782_at    | <b>ANXA5</b>      | 308 annexin A5                                                                                                         | 6.56   | 0.00 |
| 205639_at    | <b>AOAH</b>       | 313 acyloxyacyl hydrolase (neutrophil)<br>amine oxidase, copper containing 3 (vascular<br>adhesion protein 1)          | -3.74  | 0.13 |
| 204894_s_at  | <b>AOC3</b>       | 8639                                                                                                                   | -5.75  | 0.37 |
| 223024_at    | <b>AP1M1</b>      | 8907 adaptor-related protein complex 1, mu 1 subunit<br>adaptor-related protein complex 2, sigma 1                     | -2.49  | 0.58 |
| 208074_s_at  | <b>AP2S1</b>      | 1175 subunit                                                                                                           | -2.04  | 0.37 |
| 204859_s_at  | <b>APAF1</b>      | 317 apoptotic peptidase activating factor 1                                                                            | -2.75  | 0.00 |
| 208703_s_at  | <b>APLP2</b>      | 334 amyloid beta (A4) precursor-like protein 2                                                                         | -2.08  | 0.00 |
| 219466_s_at  | <b>APOA2</b>      | 336 apolipoprotein A-II                                                                                                | 2.93   | 0.00 |
| 220023_at    | <b>APOB48R</b>    | 55911 apolipoprotein B48 receptor<br>apolipoprotein B mRNA editing enzyme, catalytic                                   | -2.12  | 0.58 |
| 207158_at    | <b>APOBEC1</b>    | 339 polypeptide 1<br>apolipoprotein B mRNA editing enzyme, catalytic                                                   | 2.32   | 0.00 |
| 204205_at    | <b>APOBEC3G</b>   | 60489 polypeptide-like 3G<br>apolipoprotein B mRNA editing enzyme, catalytic                                           | 2.69   | 0.37 |
| 1554545_at   | <b>APOBEC4</b>    | 403314 polypeptide-like 4 (putative)                                                                                   | 2.61   | 0.10 |
|              | <b>APOC2</b> ///  | 344 ///                                                                                                                |        |      |
| 204561_x_at  | <b>APOC4</b>      | 346 apolipoprotein C-II ///<br>apolipoprotein C-IV                                                                     | -2.42  | 0.03 |
| 209546_s_at  | <b>APOL1</b>      | 8542 apolipoprotein L, 1                                                                                               | 2.11   | 0.58 |
| 221087_s_at  | <b>APOL3</b>      | 80833 apolipoprotein L, 3                                                                                              | 10.75  | 0.06 |
| 219716_at    | <b>APOL6</b>      | 80830 apolipoprotein L, 6                                                                                              | 3.62   | 0.00 |
| 201176_s_at  | <b>ARCN1</b>      | 372 archain 1                                                                                                          | 2.93   | 0.22 |
| 201097_s_at  | <b>ARF4</b>       | 378 ADP-ribosylation factor 4                                                                                          | 2.45   | 0.00 |
| 218870_at    | <b>ARHGAP15</b>   | 55843 Rho GTPase activating protein 15                                                                                 | -7.53  | 0.13 |
| 37577_at     | <b>ARHGAP19</b>   | 84986 Rho GTPase activating protein 19                                                                                 | -13.62 | 0.13 |
| 226576_at    | <b>ARHGAP26</b>   | 23092 Rho GTPase activating protein 26                                                                                 | -4.01  | 0.03 |
| 225618_at    | <b>ARHGAP27</b>   | 201176 Rho GTPase activating protein 27                                                                                | -2.23  | 0.03 |
| 204425_at    | <b>ARHGAP4</b>    | 393 Rho GTPase activating protein 4                                                                                    | -7.73  | 0.06 |
| 226906_s_at  | <b>ARHGAP9</b>    | 64333 Rho GTPase activating protein 9                                                                                  | -2.30  | 0.00 |
| 201288_at    | <b>ARHGDI B</b>   | 397 Rho GDP dissociation inhibitor (GDI) beta<br>Rho guanine nucleotide exchange factor (GEF) 10-                      | -6.92  | 0.00 |
| 221656_s_at  | <b>ARHGEF10L</b>  | 55160 like<br>rho/rac guanine nucleotide exchange factor (GEF)                                                         | 6.43   | 0.06 |
| 213039_at    | <b>ARHGEF18</b>   | 23370 18<br>rho/rac guanine nucleotide exchange factor (GEF)                                                           | -4.20  | 0.37 |
| 1554783_s_at | <b>ARHGEF2</b>    | 9181 2<br>Rac/Cdc42 guanine nucleotide exchange factor                                                                 | 3.00   | 0.00 |
| 209539_at    | <b>ARHGEF6</b>    | 9459 (GEF) 6                                                                                                           | -5.35  | 0.10 |
| 218917_s_at  | <b>ARID1A</b>     | 8289 AT rich interactive domain 1A (SWI-like)                                                                          | -4.76  | 0.06 |
| 233339_s_at  | <b>ARID1B</b>     | 57492 AT rich interactive domain 1B (SWI1-like)<br>AT rich interactive domain 1B (SWI1-like) ///                       | -3.04  | 0.58 |
|              | <b>ARID1B</b> /// | 57492 ///<br>similar to AT rich interactive domain 1B (SWI1-                                                           |        |      |
| 225181_at    | <b>LOC729446</b>  | 729446 like) isoform 1                                                                                                 | -2.00  | 0.13 |
| 205062_x_at  | <b>ARID4A</b>     | 5926 AT rich interactive domain 4A (RBP1-like)                                                                         | -2.86  | 0.00 |
| 213138_at    | <b>ARID5A</b>     | 10865 AT rich interactive domain 5A (MRF1-like)                                                                        | -2.26  | 0.22 |
| 212614_at    | <b>ARID5B</b>     | 84159 AT rich interactive domain 5B (MRF1-like)                                                                        | 22.31  | 0.00 |
| 202641_at    | <b>ARL3</b>       | 403 ADP-ribosylation factor-like 3                                                                                     | -5.00  | 0.13 |
| 242727_at    | <b>ARL5B</b>      | 221079 ADP-ribosylation factor-like 5B                                                                                 | 27.21  | 0.00 |
| 225707_at    | <b>ARL6IP6</b>    | 151188 ADP-ribosylation-like factor 6 interacting protein 6                                                            | -4.56  | 0.06 |

|              |                  |                                                                                                                                             |        |      |
|--------------|------------------|---------------------------------------------------------------------------------------------------------------------------------------------|--------|------|
| 222442_s_at  | <b>ARL8B</b>     | 55207 ADP-ribosylation factor-like 8B                                                                                                       | 4.89   | 0.00 |
| 217858_s_at  | <b>ARMCX3</b>    | 51566 armadillo repeat containing, X-linked 3                                                                                               | 8.38   | 0.00 |
| 214749_s_at  | <b>ARMCX6</b>    | 54470 armadillo repeat containing, X-linked 6                                                                                               | 6.20   | 0.22 |
| 202655_at    | <b>ARMET</b>     | 7873 arginine-rich, mutated in early stage tumors                                                                                           | 2.53   | 0.22 |
| 230619_at    | <b>ARNT</b>      | 405 aryl hydrocarbon receptor nuclear translocator                                                                                          | -2.14  | 0.22 |
| 209824_s_at  | <b>ARNTL</b>     | 406 aryl hydrocarbon receptor nuclear translocator-like                                                                                     | -4.45  | 0.37 |
| 221482_s_at  | <b>ARPP-19</b>   | 10776 cyclic AMP phosphoprotein, 19 kD                                                                                                      | -2.28  | 0.13 |
| 226055_at    | <b>ARRDC2</b>    | 27106 arrestin domain containing 2                                                                                                          | 5.48   | 0.03 |
| 224797_at    | <b>ARRDC3</b>    | 57561 arrestin domain containing 3                                                                                                          | -3.26  | 0.03 |
| 204443_at    | <b>ARSA</b>      | 410 arylsulfatase A                                                                                                                         | -2.15  | 0.22 |
| 232197_x_at  | <b>ARSB</b>      | 411 arylsulfatase B                                                                                                                         | 5.86   | 0.00 |
| 1552632_a_at | <b>ARSG</b>      | 22901 arylsulfatase G                                                                                                                       | -4.85  | 0.13 |
| 1570479_at   | <b>ART1</b>      | 417 ADP-ribosyltransferase 1<br>N-acylsphingosine amidohydrolase (acid<br>ceramidase)-like                                                  | 4.60   | 0.58 |
| 227135_at    | <b>AS AHL</b>    | 27163 ceramidase)-like                                                                                                                      | -15.71 | 0.00 |
| 219996_at    | <b>ASB7</b>      | 140460 ankyrin repeat and SOCS box-containing 7                                                                                             | -2.80  | 0.58 |
| 226861_at    | <b>ASB8</b>      | 140461 ankyrin repeat and SOCS box-containing 8                                                                                             | -2.10  | 0.00 |
| 1554627_a_at | <b>ASCC1</b>     | 51008 activating signal cointegrator 1 complex subunit 1                                                                                    | 2.85   | 0.58 |
| 209988_s_at  | <b>ASCL1</b>     | 429 achaete-scute complex homolog 1 (Drosophila)<br>ash2 (absent, small, or homeotic)-like                                                  | 2.61   | 0.06 |
| 209517_s_at  | <b>ASH2L</b>     | 9070 (Drosophila)                                                                                                                           | -4.50  | 0.03 |
| 217987_at    | <b>ASNSD1</b>    | 54529 asparagine synthetase domain containing 1                                                                                             | -2.45  | 0.22 |
| 202672_s_at  | <b>ATF3</b>      | 467 activating transcription factor 3                                                                                                       | 14.57  | 0.06 |
| 204998_s_at  | <b>ATF5</b>      | 22809 activating transcription factor 5                                                                                                     | 15.14  | 0.00 |
| 226941_at    | <b>ATF6</b>      | 22926 activating transcription factor 6                                                                                                     | -2.75  | 0.10 |
| 229389_at    | <b>ATG16L2</b>   | 89849 ATG16 autophagy related 16-like 2 (S. cerevisiae)<br>ATG2 autophagy related 2 homolog B (S.                                           | -6.15  | 0.00 |
| 219164_s_at  | <b>ATG2B</b>     | 55102 cerevisiae)<br>ATG7 autophagy related 7 homolog (S.                                                                                   | -4.28  | 0.58 |
| 224025_s_at  | <b>ATG7</b>      | 10533 cerevisiae)<br>ATG9 autophagy related 9 homolog A (S.                                                                                 | 5.64   | 0.00 |
| 202492_at    | <b>ATG9A</b>     | 79065 cerevisiae)                                                                                                                           | -4.70  | 0.03 |
| 219359_at    | <b>ATHL1</b>     | 80162 ATH1, acid trehalase-like 1 (yeast)                                                                                                   | -3.65  | 0.00 |
| 212672_at    | <b>ATM</b>       | 472 ataxia telangiectasia mutated<br>ataxia telangiectasia mutated /// similar to Serine-<br>protein kinase ATM (Ataxia telangiectasia      | -6.10  | 0.03 |
| 208442_s_at  | <b>ATM ///</b>   | 472 ///                                                                                                                                     |        |      |
| 228890_at    | <b>LOC651610</b> | 651610 mutated) (A-T, mutated)                                                                                                              | -3.71  | 0.37 |
| 238811_at    | <b>ATOH8</b>     | 84913 atonal homolog 8 (Drosophila)                                                                                                         | 13.29  | 0.10 |
| 219558_at    | <b>ATP11B</b>    | 23200 ATPase, Class VI, type 11B                                                                                                            | -3.09  | 0.00 |
| 243585_at    | <b>ATP13A3</b>   | 79572 ATPase type 13A3                                                                                                                      | 11.24  | 0.00 |
|              | <b>ATP13A5</b>   | 344905 ATPase type 13A5                                                                                                                     | 2.74   | 0.22 |
| 220948_s_at  | <b>ATP1A1</b>    | 476 ATPase, Na <sup>+</sup> /K <sup>+</sup> transporting, alpha 1 polypeptide                                                               | 4.99   | 0.00 |
| 201243_s_at  | <b>ATP1B1</b>    | 481 ATPase, Na <sup>+</sup> /K <sup>+</sup> transporting, beta 1 polypeptide                                                                | 4.21   | 0.37 |
| 208836_at    | <b>ATP1B3</b>    | 483 ATPase, Na <sup>+</sup> /K <sup>+</sup> transporting, beta 3 polypeptide<br>ATPase, Ca <sup>++</sup> transporting, cardiac muscle, slow | 5.62   | 0.13 |
| 209186_at    | <b>ATP2A2</b>    | 488 twitch 2                                                                                                                                | 2.42   | 0.06 |
| 213036_x_at  | <b>ATP2A3</b>    | 489 ATPase, Ca <sup>++</sup> transporting, ubiquitous                                                                                       | -5.57  | 0.00 |
| 215716_s_at  | <b>ATP2B1</b>    | 490 ATPase, Ca <sup>++</sup> transporting, plasma membrane 1                                                                                | 2.53   | 0.00 |
| 212136_at    | <b>ATP2B4</b>    | 493 ATPase, Ca <sup>++</sup> transporting, plasma membrane 4                                                                                | -4.04  | 0.13 |

|              |                 |                                                                         |       |      |
|--------------|-----------------|-------------------------------------------------------------------------|-------|------|
| 209492_x_at  | <b>ATP5I</b>    | ATP synthase, H+ transporting, mitochondrial F0 521 complex, subunit E  | -2.12 | 0.37 |
| 207809_s_at  | <b>ATP6AP1</b>  | ATPase, H+ transporting, lysosomal accessory 537 protein 1              | 2.45  | 0.37 |
| 202874_s_at  | <b>ATP6V1C1</b> | ATPase, H+ transporting, lysosomal 42kDa, V1 528 subunit C1             | 4.68  | 0.00 |
| 208899_x_at  | <b>ATP6V1D</b>  | ATPase, H+ transporting, lysosomal 34kDa, V1 51382 subunit D            | 3.68  | 0.00 |
| 201527_at    | <b>ATP6V1F</b>  | ATPase, H+ transporting, lysosomal 14kDa, V1 9296 subunit F             | 3.19  | 0.10 |
| 208737_at    | <b>ATP6V1G1</b> | ATPase, H+ transporting, lysosomal 13kDa, V1 9550 subunit G1            | 3.98  | 0.00 |
| 221504_s_at  | <b>ATP6V1H</b>  | ATPase, H+ transporting, lysosomal 50/57kDa, V1 51606 subunit H         | 3.03  | 0.22 |
| 218671_s_at  | <b>ATPIF1</b>   | 93974 ATPase inhibitory factor 1                                        | -3.23 | 0.13 |
| 205539_at    | <b>AVIL</b>     | 10677 advillin                                                          | -3.29 | 0.58 |
| 225557_at    | <b>AXUD1</b>    | 64651 AXIN1 up-regulated 1                                              | 2.40  | 0.00 |
| 227889_at    | <b>AYTL1</b>    | 54947 acyltransferase like 1                                            | -2.20 | 0.37 |
| 201818_at    | <b>AYTL2</b>    | 79888 acyltransferase like 2                                            | 2.67  | 0.00 |
| 201772_at    | <b>AZIN1</b>    | 51582 antizyme inhibitor 1                                              | 3.68  | 0.06 |
| 1554835_a_at | <b>B3GNT5</b>   | 84002 UDP-GlcNAc:betaGal beta-1,3-N-acetylglucosaminyltransferase 5     | 5.71  | 0.00 |
| 212876_at    | <b>B4GALT4</b>  | 8702 UDP-Gal:betaGlcNAc beta 1,4-galactosyltransferase, polypeptide 4   | 3.62  | 0.22 |
| 203304_at    | <b>BAMBI</b>    | 25805 BMP and activin membrane-bound inhibitor homolog (Xenopus laevis) | 2.06  | 0.06 |
| 205965_at    | <b>BATF</b>     | 10538 basic leucine zipper transcription factor, ATF-like               | 12.02 | 0.00 |
| 228439_at    | <b>BATF2</b>    | 116071 2 basic leucine zipper transcription factor, ATF-like            | 18.88 | 0.00 |
| 203080_s_at  | <b>BAZ2B</b>    | 29994 bromodomain adjacent to zinc finger domain, 2B                    | -3.35 | 0.06 |
| 200837_at    | <b>BCAP31</b>   | 10134 B-cell receptor-associated protein 31                             | -3.08 | 0.10 |
| 214452_at    | <b>BCAT1</b>    | 586 branched chain aminotransferase 1, cytosolic                        | 41.65 | 0.13 |
| 219498_s_at  | <b>BCL11A</b>   | 53335 B-cell CLL/lymphoma 11A (zinc finger protein)                     | 4.14  | 0.37 |
| 225606_at    | <b>BCL2L11</b>  | 10018 BCL2-like 11 (apoptosis facilitator)                              | -4.62 | 0.06 |
| 227616_at    | <b>BCL9L</b>    | 283149 B-cell CLL/lymphoma 9-like                                       | 8.23  | 0.00 |
| 219433_at    | <b>BCOR</b>     | 54880 BCL6 co-repressor                                                 | 3.21  | 0.00 |
| 201169_s_at  | <b>BHLHB2</b>   | 8553 2 basic helix-loop-helix domain containing, class B,               | 4.73  | 0.00 |
| 229437_at    | <b>BIC</b>      | 114614 BIC transcript                                                   | 10.64 | 0.10 |
| 213154_s_at  | <b>BICD2</b>    | 23299 bicaudal D homolog 2 (Drosophila)                                 | -5.52 | 0.00 |
| 211725_s_at  | <b>BID</b>      | 637 BH3 interacting domain death agonist                                | 2.04  | 0.00 |
| 219191_s_at  | <b>BIN2</b>     | 51411 bridging integrator 2                                             | -2.35 | 0.00 |
| 210538_s_at  | <b>BIRC3</b>    | 330 baculoviral IAP repeat-containing 3                                 | 6.18  | 0.10 |
| 225858_s_at  | <b>BIRC4</b>    | 331 baculoviral IAP repeat-containing 4                                 | 2.82  | 0.13 |
| 203840_at    | <b>BLZF1</b>    | 8548 basic leucine zipper nuclear factor 1 (JEM-1)                      | 2.08  | 0.37 |
| 226530_at    | <b>BMF</b>      | 90427 Bcl2 modifying factor                                             | 9.46  | 0.00 |
| 214716_at    | <b>BMP2K</b>    | 55589 BMP2 inducible kinase                                             | -5.15 | 0.13 |
| 221478_at    | <b>BNIP3L</b>   | 665 BCL2/adenovirus E1B 19kDa interacting protein 3-like                | -2.24 | 0.00 |
| 205557_at    | <b>BPI</b>      | 671 bactericidal/permeability-increasing protein                        | -2.32 | 0.58 |
| 229436_x_at  | <b>BRCC3</b>    | 79184 BRCA1/BRCA2-containing complex, subunit 3                         | -5.11 | 0.58 |
| 204520_x_at  | <b>BRD1</b>     | 23774 bromodomain containing 1                                          | -2.40 | 0.13 |
| 202227_s_at  | <b>BRD8</b>     | 10902 bromodomain containing 8                                          | -9.47 | 0.58 |
| 205715_at    | <b>BST1</b>     | 683 bone marrow stromal cell antigen 1                                  | -6.04 | 0.13 |
| 226963_at    | <b>BTF3L4</b>   | 91408 basic transcription factor 3-like 4                               | 2.19  | 0.10 |
| 213134_x_at  | <b>BTG3</b>     | 10950 BTG family, member 3                                              | 57.73 | 0.10 |

|              |                     |                                                                  |        |      |
|--------------|---------------------|------------------------------------------------------------------|--------|------|
| 205504_at    | <b>BTK</b>          | 695 Bruton agammaglobulinemia tyrosine kinase                    | -2.68  | 0.58 |
| 205298_s_at  | <b>BTN2A2</b>       | 10385 butyrophilin, subfamily 2, member A2                       | 3.02   | 0.37 |
| 217207_s_at  | <b>BTNL3</b>        | 10917 butyrophilin-like 3                                        | -2.44  | 0.22 |
| 225866_at    | <b>BXDC1</b>        | 84154 brix domain containing 1                                   | 14.34  | 0.22 |
| 228068_at    | <b>C10orf132</b>    | 401647 chromosome 10 open reading frame 132                      | -2.02  | 0.13 |
| 225192_at    | <b>C10orf46</b>     | 143384 chromosome 10 open reading frame 46                       | -3.22  | 0.00 |
| 225373_at    | <b>C10orf54</b>     | 64115 chromosome 10 open reading frame 54                        | -2.39  | 0.00 |
| 1557531_a_at | <b>C10orf55</b>     | 414236 chromosome 10 open reading frame 55                       | 65.19  | 0.13 |
| 236027_at    | <b>C10orf78</b>     | 119392 chromosome 10 open reading frame 78                       | 3.37   | 0.13 |
| 222617_s_at  | <b>C10orf84</b>     | 63877 chromosome 10 open reading frame 84                        | -4.40  | 0.06 |
| 218213_s_at  | <b>C11orf10</b>     | 746 chromosome 11 open reading frame 10                          | 2.75   | 0.00 |
|              | <b>C11orf17</b> /// | 56672 ///<br>chromosome 11 open reading frame 17 ///             |        |      |
| 220987_s_at  | <b>NUAK2</b>        | 81788 family, SNF1-like kinase, 2                                | -28.48 | 0.00 |
| 220560_at    | <b>C11orf21</b>     | 29125 chromosome 11 open reading frame 21                        | -18.65 | 0.37 |
| 219012_s_at  | <b>C11orf30</b>     | 56946 chromosome 11 open reading frame 30                        | -2.53  | 0.06 |
| 212560_at    | <b>C11orf32</b>     | 442871 chromosome 11 open reading frame 32                       | -21.50 | 0.00 |
| 229851_s_at  | <b>C11orf54</b>     | 28970 chromosome 11 open reading frame 54                        | -4.32  | 0.03 |
| 219806_s_at  | <b>C11orf75</b>     | 56935 chromosome 11 open reading frame 75                        | 8.19   | 0.00 |
| 220060_s_at  | <b>C12orf48</b>     | 55010 chromosome 12 open reading frame 48                        | 4.18   | 0.10 |
| 1553142_at   | <b>C13orf31</b>     | 144811 chromosome 13 open reading frame 31                       | 14.31  | 0.00 |
| 223215_s_at  | <b>C14orf100</b>    | 51528 chromosome 14 open reading frame 100                       | -2.54  | 0.03 |
| 213246_at    | <b>C14orf109</b>    | 26175 chromosome 14 open reading frame 109                       | 3.01   | 0.00 |
| 223239_at    | <b>C14orf129</b>    | 51527 chromosome 14 open reading frame 129                       | -3.50  | 0.13 |
| 218940_at    | <b>C14orf138</b>    | 79609 chromosome 14 open reading frame 138                       | -14.55 | 0.06 |
| 218298_s_at  | <b>C14orf159</b>    | 80017 chromosome 14 open reading frame 159                       | -7.10  | 0.03 |
| 1563524_a_at | <b>C14orf85</b>     | 319085 chromosome 14 open reading frame 85                       | -13.09 | 0.37 |
| 218383_at    | <b>C14orf94</b>     | 54930 chromosome 14 open reading frame 94                        | -14.57 | 0.00 |
| 1552310_at   | <b>C15orf40</b>     | 123207 chromosome 15 open reading frame 40                       | -2.98  | 0.13 |
| 223484_at    | <b>C15orf48</b>     | 84419 chromosome 15 open reading frame 48                        | 450.80 | 0.00 |
| 229908_s_at  | <b>C16orf28</b>     | 65259 chromosome 16 open reading frame 28                        | 2.00   | 0.10 |
|              | <b>C16orf54</b> /// |                                                                  |        |      |
|              | <b>hCG_164488</b>   | 283897 ///<br>chromosome 16 open reading frame 54 ///<br>similar |        |      |
| 1559584_a_at | <b>4</b>            | 728070 to chromosome 16 open reading frame 54                    | -7.14  | 0.00 |
| 218060_s_at  | <b>C16orf57</b>     | 79650 chromosome 16 open reading frame 57                        | -2.04  | 0.37 |
| 218447_at    | <b>C16orf61</b>     | 56942 chromosome 16 open reading frame 61                        | 9.94   | 0.03 |
| 228452_at    | <b>C17orf39</b>     | 79018 chromosome 17 open reading frame 39                        | -3.46  | 0.37 |
| 227668_at    | <b>C17orf56</b>     | 146705 chromosome 17 open reading frame 56                       | -3.10  | 0.13 |
| 218130_at    | <b>C17orf62</b>     | 79415 chromosome 17 open reading frame 62                        | -4.63  | 0.37 |
| 218896_s_at  | <b>C17orf85</b>     | 55421 chromosome 17 open reading frame 85                        | -2.64  | 0.58 |
| 227881_s_at  | <b>C18orf17</b>     | 125488 Chromosome 18 open reading frame 17                       | 3.08   | 0.03 |
| 1553934_at   | <b>C18orf20</b>     | 221241 chromosome 18 open reading frame 20                       | 6.13   | 0.13 |
| 220178_at    | <b>C19orf28</b>     | 126321 chromosome 19 open reading frame 28                       | 3.48   | 0.10 |
| 235515_at    | <b>C19orf46</b>     | 163183 chromosome 19 open reading frame 46                       | 2.21   | 0.22 |
| 1553162_x_at | <b>C19orf55</b>     | 148137 chromosome 19 open reading frame 55                       | -2.25  | 0.58 |
| 235568_at    | <b>C19orf59</b>     | 199675 chromosome 19 open reading frame 59                       | 2.41   | 0.00 |
| 51200_at     | <b>C19orf60</b>     | 55049 chromosome 19 open reading frame 60                        | -6.43  | 0.10 |
| 221335_x_at  | <b>C19orf61</b>     | 56006 chromosome 19 open reading frame 61                        | 2.85   | 0.00 |
| 219283_at    | <b>C1GALT1C1</b>    | 29071 C1GALT1-specific chaperone 1                               | -3.44  | 0.22 |
| 220193_at    | <b>C1orf113</b>     | 79729 chromosome 1 open reading frame 113                        | 16.00  | 0.06 |
| 223123_s_at  | <b>C1orf128</b>     | 57095 chromosome 1 open reading frame 128                        | -2.12  | 0.22 |
| 221182_at    | <b>C1orf129</b>     | 80133 chromosome 1 open reading frame 129                        | 2.35   | 0.22 |
| 212003_at    | <b>C1orf144</b>     | 26099 chromosome 1 open reading frame 144                        | 2.07   | 0.13 |
| 213528_at    | <b>C1orf156</b>     | 92342 chromosome 1 open reading frame 156                        | -2.23  | 0.58 |
| 241809_at    | <b>C1orf183</b>     | 55924 chromosome 1 open reading frame 183                        | -10.73 | 0.00 |
| 1559638_at   | <b>C1orf200</b>     | 644997 chromosome 1 open reading frame 200                       | 2.66   | 0.22 |

|              |                    |                                                                       |        |      |
|--------------|--------------------|-----------------------------------------------------------------------|--------|------|
| 1559376_at   | <b>C1orf203</b>    | 84852 chromosome 1 open reading frame 203                             | 4.23   | 0.00 |
| 225638_at    | <b>C1orf31</b>     | 388753 chromosome 1 open reading frame 31                             | 7.36   | 0.00 |
| 241908_at    | <b>C1orf58</b>     | 148362 Chromosome 1 open reading frame 58                             | -2.25  | 0.58 |
| 225841_at    | <b>C1orf59</b>     | 113802 chromosome 1 open reading frame 59                             | -5.63  | 0.22 |
| 222301_at    | <b>C1orf61</b>     | 10485 Chromosome 1 open reading frame 61                              | 9.05   | 0.10 |
| 1554660_a_at | <b>C1orf71</b>     | 163882 chromosome 1 open reading frame 71                             | 3.67   | 0.58 |
| 225904_at    | <b>C1orf96</b>     | 126731 chromosome 1 open reading frame 96                             | -2.95  | 0.10 |
| 218983_at    | <b>C1RL</b>        | 51279 complement component 1, r subcomponent-like                     | -3.26  | 0.00 |
| 1552687_a_at | <b>C2orf152</b>    | 140894 chromosome 20 open reading frame 152                           | 2.34   | 0.13 |
| 231991_at    | <b>C2orf160</b>    | 140706 chromosome 20 open reading frame 160                           | 24.92  | 0.03 |
| 1567035_at   | <b>C2orf181</b>    | 140843 chromosome 20 open reading frame 181                           | 3.40   | 0.10 |
| 218586_at    | <b>C2orf20</b>     | 55257 chromosome 20 open reading frame 20                             | 3.16   | 0.13 |
| 206656_s_at  | <b>C2orf3</b>      | 57136 chromosome 20 open reading frame 3                              | -4.74  | 0.00 |
| 220888_s_at  | <b>C2orf32</b>     | 57091 chromosome 20 open reading frame 32                             | -31.93 | 0.22 |
| 225890_at    | <b>C2orf72</b>     | 92667 chromosome 20 open reading frame 72                             | -3.05  | 0.58 |
| 223360_at    | <b>C2orf56</b>     | 84221 chromosome 21 open reading frame 56                             | -3.06  | 0.03 |
| 244369_at    | <b>C2orf59</b>     | 56683 chromosome 21 open reading frame 59                             | 2.02   | 0.58 |
| 1556072_at   | <b>C2orf37</b>     | 200298 chromosome 22 open reading frame 37                            | 3.73   | 0.03 |
| 217118_s_at  | <b>C2orf9</b>      | 23313 chromosome 22 open reading frame 9                              | -3.04  | 0.37 |
| 1552740_at   | <b>C2orf15</b>     | 150590 chromosome 2 open reading frame 15                             | 2.00   | 0.03 |
| 200070_at    | <b>C2orf24</b>     | 27013 chromosome 2 open reading frame 24                              | -3.44  | 0.03 |
| 226951_at    | <b>C2orf49</b>     | 79074 chromosome 2 open reading frame 49                              | -2.32  | 0.37 |
|              |                    | 51072 ///                                                             |        |      |
|              | <b>C2orf4P ///</b> | 728556 ///<br>Methylation modifier for class I HLA ///<br>mediator of |        |      |
| 219065_s_at  | <b>MEMO1</b>       | 7795 cell motility 1 ///<br>C2orf4 pseudogene                         | -4.61  | 0.06 |
|              |                    |                                                                       |        |      |
|              | <b>C2orf59 ///</b> | 112597 ///<br>chromosome 2 open reading frame 59 ///                  |        |      |
| 225799_at    | <b>LOC541471</b>   | 541471 hypothetical LOC541471                                         | -2.71  | 0.00 |
| 209906_at    | <b>C3AR1</b>       | 719 complement component 3a receptor 1                                | 8.21   | 0.00 |
| 1553158_at   | <b>C3orf34</b>     | 84984 chromosome 3 open reading frame 34                              | -7.54  | 0.00 |
| 227599_at    | <b>C3orf59</b>     | 151963 chromosome 3 open reading frame 59                             | 7.28   | 0.58 |
| 219023_at    | <b>C4orf16</b>     | 55435 chromosome 4 open reading frame 16                              | 6.81   | 0.06 |
| 229152_at    | <b>C4orf7</b>      | 260436 chromosome 4 open reading frame 7                              | 2.01   | 0.06 |
| 203024_s_at  | <b>C5orf15</b>     | 56951 chromosome 5 open reading frame 15                              | 2.32   | 0.06 |
| 1552386_at   | <b>C5orf29</b>     | 202309 chromosome 5 open reading frame 29                             | 2.35   | 0.10 |
| 217925_s_at  | <b>C6orf106</b>    | 64771 chromosome 6 open reading frame 106                             | 2.16   | 0.00 |
| 232492_at    | <b>C6orf112</b>    | 154442 chromosome 6 open reading frame 112                            | 2.31   | 0.37 |
| 223361_at    | <b>C6orf115</b>    | 58527 chromosome 6 open reading frame 115                             | 2.94   | 0.10 |
| 212923_s_at  | <b>C6orf145</b>    | 221749 chromosome 6 open reading frame 145                            | 10.08  | 0.06 |
| 236178_at    | <b>C6orf162</b>    | 57150 chromosome 6 open reading frame 162                             | -5.52  | 0.58 |
| 220904_at    | <b>C6orf208</b>    | 80069 chromosome 6 open reading frame 208                             | 2.31   | 0.06 |
| 225576_at    | <b>C6orf72</b>     | 116254 chromosome 6 open reading frame 72                             | -3.71  | 0.37 |
| 224987_at    | <b>C6orf89</b>     | 221477 chromosome 6 open reading frame 89                             | 2.03   | 0.13 |
| 221573_at    | <b>C7orf25</b>     | 79020 chromosome 7 open reading frame 25                              | -5.19  | 0.37 |
| 226385_s_at  | <b>C7orf30</b>     | 115416 chromosome 7 open reading frame 30                             | -2.44  | 0.22 |
| 226018_at    | <b>C7orf41</b>     | 222166 chromosome 7 open reading frame 41                             | -9.58  | 0.06 |
| 220659_s_at  | <b>C7orf43</b>     | 55262 chromosome 7 open reading frame 43                              | -2.41  | 0.00 |
| 206497_at    | <b>C7orf44</b>     | 55744 chromosome 7 open reading frame 44                              | -2.72  | 0.37 |
| 1557866_at   | <b>C9orf117</b>    | 286207 chromosome 9 open reading frame 117                            | 2.63   | 0.00 |
| 1559340_at   | <b>C9orf148</b>    | 401550 chromosome 9 open reading frame 148                            | 2.00   | 0.37 |
| 225602_at    | <b>C9orf19</b>     | 152007 chromosome 9 open reading frame 19                             | -3.72  | 0.00 |
| 232270_at    | <b>C9orf3</b>      | 84909 Chromosome 9 open reading frame 3                               | 2.44   | 0.22 |
| 1553756_at   | <b>C9orf70</b>     | 84850 chromosome 9 open reading frame 70                              | 2.46   | 0.37 |
| 223398_at    | <b>C9orf89</b>     | 84270 chromosome 9 open reading frame 89                              | 3.47   | 0.13 |
| 221865_at    | <b>C9orf91</b>     | 203197 chromosome 9 open reading frame 91                             | 8.11   | 0.03 |

|              |                   |                                                                                                                                                  |        |      |
|--------------|-------------------|--------------------------------------------------------------------------------------------------------------------------------------------------|--------|------|
| 203963_at    | <b>CA12</b>       | 771 carbonic anhydrase XII                                                                                                                       | 2.80   | 0.13 |
| 209301_at    | <b>CA2</b>        | 760 carbonic anhydrase II                                                                                                                        | 2.18   | 0.13 |
| 217873_at    | <b>CAB39</b>      | 51719 calcium binding protein 39<br>chaperone, ABC1 activity of bc1 complex homolog                                                              | -2.00  | 0.03 |
| 218168_s_at  | <b>CABC1</b>      | 56997 (S. pombe)                                                                                                                                 | -11.68 | 0.00 |
| 37652_at     | <b>CABIN1</b>     | 23523 calcineurin binding protein 1                                                                                                              | -5.61  | 0.13 |
| 209563_x_at  | <b>CALM1</b>      | 801 calmodulin 1 (phosphorylase kinase, delta)                                                                                                   | -2.19  | 0.03 |
| 212953_x_at  | <b>CALR</b>       | 811 calreticulin                                                                                                                                 | 3.17   | 0.06 |
| 200757_s_at  | <b>CALU</b>       | 813 calumenin                                                                                                                                    | 3.28   | 0.03 |
| 235626_at    | <b>CAMK1D</b>     | 57118 calcium/calmodulin-dependent protein kinase ID                                                                                             | -13.30 | 0.00 |
| 226382_at    | <b>CAMK1D ///</b> | 283070 /// calcium/calmodulin-dependent protein kinase ID                                                                                        |        |      |
|              | <b>LOC283070</b>  | 57118 /// hypothetical protein LOC283070<br>Calcium/calmodulin-dependent protein kinase                                                          | -12.35 | 0.37 |
| 34846_at     | <b>CAMK2B</b>     | 816 (CaM kinase) II beta<br>calcium/calmodulin-dependent protein kinase                                                                          | -2.04  | 0.03 |
| 212757_s_at  | <b>CAMK2G</b>     | 818 (CaM kinase) II gamma                                                                                                                        | -7.19  | 0.00 |
| 241871_at    | <b>CAMK4</b>      | 814 calcium/calmodulin-dependent protein kinase IV                                                                                               | 2.57   | 0.10 |
| 210244_at    | <b>CAMP</b>       | 820 cathelicidin antimicrobial peptide                                                                                                           | -20.38 | 0.10 |
| 221732_at    | <b>CANT1</b>      | 124583 calcium activated nucleotidase 1                                                                                                          | -2.15  | 0.13 |
| 208852_s_at  | <b>CANX</b>       | 821 calnexin<br>CAP, adenylate cyclase-associated protein 1                                                                                      | 4.57   | 0.00 |
| 213798_s_at  | <b>CAP1</b>       | 10487 (yeast)                                                                                                                                    | -2.15  | 0.03 |
| 200752_s_at  | <b>CAPN1</b>      | 823 calpain 1, (mu/l) large subunit                                                                                                              | -2.88  | 0.13 |
| 220599_s_at  | <b>CARD14</b>     | 79092 caspase recruitment domain family, member 14                                                                                               | -2.20  | 0.37 |
| 228641_at    | <b>CARD8</b>      | 22900 caspase recruitment domain family, member 8<br>cysteinyl-tRNA synthetase 2, mitochondrial                                                  | -2.37  | 0.22 |
| 218153_at    | <b>CARS2</b>      | 79587 (putative)                                                                                                                                 | -3.13  | 0.00 |
| 224619_at    | <b>CASC4</b>      | 113201 cancer susceptibility candidate 4<br>caspase 2, apoptosis-related cysteine peptidase<br>(neural precursor cell expressed, developmentally | -4.12  | 0.00 |
| 208050_s_at  | <b>CASP2</b>      | 835 down-regulated 2)                                                                                                                            | -5.27  | 0.13 |
| 207500_at    | <b>CASP5</b>      | 838 caspase 5, apoptosis-related cysteine peptidase                                                                                              | 5.90   | 0.00 |
| 207181_s_at  | <b>CASP7</b>      | 840 caspase 7, apoptosis-related cysteine peptidase                                                                                              | 2.89   | 0.37 |
| 213373_s_at  | <b>CASP8</b>      | 841 caspase 8, apoptosis-related cysteine peptidase                                                                                              | -3.74  | 0.00 |
| 207317_s_at  | <b>CASQ2</b>      | 845 calsequestrin 2 (cardiac muscle)                                                                                                             | 3.04   | 0.06 |
| 238363_at    | <b>CAT</b>        | 847 Catalase                                                                                                                                     | -11.06 | 0.00 |
| 216903_s_at  | <b>CBARA1</b>     | 10367 calcium binding atopy-related autoantigen 1<br>core-binding factor, runt domain, alpha subunit 2;                                          | 2.66   | 0.10 |
| 208056_s_at  | <b>CBFA2T3</b>    | 863 translocated to, 3                                                                                                                           | -53.82 | 0.00 |
| 212816_s_at  | <b>CBS</b>        | 875 cystathionine-beta-synthase                                                                                                                  | -3.73  | 0.00 |
| 226193_x_at  | <b>CBWD1</b>      | 55871 COBW domain containing 1<br>chromobox homolog 1 (HP1 beta homolog                                                                          | -2.87  | 0.06 |
| 201518_at    | <b>CBX1</b>       | 10951 Drosophila )                                                                                                                               | -3.22  | 0.00 |
|              | <b>CBX3 ///</b>   | 11335 /// chromobox homolog 3 (HP1 gamma homolog,                                                                                                |        |      |
| 200037_s_at  | <b>LOC653972</b>  | 653972 Drosophila) /// similar to chromobox homolog 3                                                                                            | -2.10  | 0.13 |
| 212914_at    | <b>CBX7</b>       | 23492 chromobox homolog 7                                                                                                                        | -9.88  | 0.03 |
| 229063_s_at  | <b>CCDC107</b>    | 203260 coiled-coil domain containing 107                                                                                                         | 2.95   | 0.58 |
| 235208_at    | <b>CCDC112</b>    | 153733 coiled-coil domain containing 112                                                                                                         | -8.96  | 0.06 |
| 229082_at    | <b>CCDC125</b>    | 202243 coiled-coil domain containing 125                                                                                                         | -7.22  | 0.06 |
| 1554023_s_at | <b>CCDC13</b>     | 152206 coiled-coil domain containing 13                                                                                                          | -5.89  | 0.00 |
| 1557366_at   | <b>CCDC144B</b>   | 284047 coiled-coil domain containing 144B                                                                                                        | -2.61  | 0.22 |
| 220308_at    | <b>CCDC19</b>     | 25790 coiled-coil domain containing 19                                                                                                           | -3.45  | 0.10 |
| 209479_at    | <b>CCDC28A</b>    | 25901 coiled-coil domain containing 28A                                                                                                          | -7.16  | 0.00 |



|              |                   |                                                                 |        |      |
|--------------|-------------------|-----------------------------------------------------------------|--------|------|
| 218655_s_at  | <b>CCDC49</b>     | 54883 coiled-coil domain containing 49                          | 2.14   | 0.37 |
| 212886_at    | <b>CCDC69</b>     | 26112 coiled-coil domain containing 69                          | -2.04  | 0.10 |
| 223301_s_at  | <b>CCDC82</b>     | 79780 coiled-coil domain containing 82                          | 2.29   | 0.58 |
| 209689_at    | <b>CCDC93</b>     | 54520 coiled-coil domain containing 93                          | 4.67   | 0.00 |
| 210133_at    | <b>CCL11</b>      | 6356 chemokine (C-C motif) ligand 11                            | 2.84   | 0.03 |
|              |                   | chemokine (C-C motif) ligand 18 (pulmonary and                  |        |      |
| 209924_at    | <b>CCL18</b>      | 6362 activation-regulated)                                      | 16.71  | 0.10 |
| 216598_s_at  | <b>CCL2</b>       | 6347 chemokine (C-C motif) ligand 2                             | 67.78  | 0.00 |
| 205476_at    | <b>CCL20</b>      | 6364 chemokine (C-C motif) ligand 20                            | 423.34 | 0.00 |
| 210548_at    | <b>CCL23</b>      | 6368 chemokine (C-C motif) ligand 23                            | 9.94   | 0.22 |
|              |                   | chemokine (C-C motif) ligand 3 /// chemokine (C-                |        |      |
|              |                   | C motif) ligand 3-like 1 /// chemokine (C-C motif)              |        |      |
|              | <b>CCL3 ///</b>   | ligand 3-like 3 /// similar to Small inducible                  |        |      |
|              | <b>CCL3L1 ///</b> | 414062 /// cytokine A3-like 1 precursor (Tonsillar lymphocyte   |        |      |
|              | <b>CCL3L3 ///</b> | 6348 /// LD78 beta protein) (LD78-beta(1-70)) (G0/G1            |        |      |
|              | <b>LOC728830</b>  | 6349 /// switch regulatory protein 19-2) (GOS19-2 protein)      |        |      |
|              | <b>///</b>        | 728830 /// (PAT 464.2) /// similar to chemokine (C-C motif)     |        |      |
| 205114_s_at  | <b>LOC730422</b>  | 730422 ligand 3-like 3                                          | 8.29   | 0.00 |
| 204103_at    | <b>CCL4</b>       | 6351 chemokine (C-C motif) ligand 4                             | 30.32  | 0.00 |
| 204655_at    | <b>CCL5</b>       | 6352 chemokine (C-C motif) ligand 5                             | 4.89   | 0.37 |
| 223164_at    | <b>CCM2</b>       | 83605 cerebral cavernous malformation 2                         | -12.96 | 0.03 |
| 201700_at    | <b>CCND3</b>      | 896 cyclin D3                                                   | -3.99  | 0.00 |
| 223084_s_at  | <b>CCNDBP1</b>    | 23582 cyclin D-type binding-protein 1                           | -5.23  | 0.00 |
| 202769_at    | <b>CCNG2</b>      | 901 cyclin G2                                                   | -2.69  | 0.00 |
| 219227_at    | <b>CCNJL</b>      | 79616 cyclin J-like                                             | -31.82 | 0.00 |
| 204645_at    | <b>CCNT2</b>      | 905 cyclin T2                                                   | 2.20   | 0.13 |
| 224652_at    | <b>CCNY</b>       | 219771 cyclin Y                                                 | -5.60  | 0.00 |
| 214151_s_at  | <b>CCPG1</b>      | 9236 cell cycle progression 1                                   | -14.10 | 0.00 |
| 206991_s_at  | <b>CCR5</b>       | 1234 chemokine (C-C motif) receptor 5                           | 23.95  | 0.00 |
| 206337_at    | <b>CCR7</b>       | 1236 chemokine (C-C motif) receptor 7                           | 50.58  | 0.58 |
|              | <b>CCRL2 ///</b>  | 727811 /// chemokine (C-C motif) receptor-like 2 /// similar to |        |      |
| 211434_s_at  | <b>LOC727811</b>  | 9034 chemokine (C-C motif) receptor-like 2                      | 118.66 | 0.00 |
|              |                   | chaperonin containing TCP1, subunit 6A (zeta 1)                 |        |      |
| 227301_at    | <b>CCT6AP1</b>    | 643253 pseudogene 1                                             | -2.67  | 0.37 |
| 200873_s_at  | <b>CCT8</b>       | 10694 chaperonin containing TCP1, subunit 8 (theta)             | 2.13   | 0.37 |
| 215049_x_at  | <b>CD163</b>      | 9332 CD163 molecule                                             | 8.56   | 0.22 |
|              | <b>CD22 ///</b>   | 4099 ///                                                        |        |      |
| 217422_s_at  | <b>MAG</b>        | 933 CD22 molecule /// myelin associated glycoprotein            | 36.76  | 0.00 |
| 209771_x_at  | <b>CD24</b>       | 934 CD24 molecule                                               | -2.95  | 0.22 |
| 223834_at    | <b>CD274</b>      | 29126 CD274 molecule                                            | 7.10   | 0.00 |
| 1553043_a_at | <b>CD300LF</b>    | 146722 CD300 molecule-like family member f                      | -3.03  | 0.03 |
| 203799_at    | <b>CD302</b>      | 9936 CD302 molecule                                             | -31.89 | 0.00 |
| 205692_s_at  | <b>CD38</b>       | 952 CD38 molecule                                               | 2.45   | 0.22 |
|              |                   | CD40 molecule, TNF receptor superfamily                         |        |      |
| 35150_at     | <b>CD40</b>       | 958 member 5                                                    | 2.10   | 0.10 |
| 210916_s_at  | <b>CD44</b>       | 960 CD44 molecule (Indian blood group)                          | 5.15   | 0.00 |
| 207549_x_at  | <b>CD46</b>       | 4179 CD46 molecule, complement regulatory protein               | -3.97  | 0.00 |
| 237759_at    | <b>CD48</b>       | 962 CD48 molecule                                               | 16.70  | 0.00 |
| 34210_at     | <b>CD52</b>       | 1043 CD52 molecule                                              | -5.52  | 0.00 |
| 222061_at    | <b>CD58</b>       | 965 CD58 molecule                                               | 2.02   | 0.10 |
| 203507_at    | <b>CD68</b>       | 968 CD68 molecule                                               | 6.97   | 0.00 |
| 209795_at    | <b>CD69</b>       | 969 CD69 molecule                                               | 17.88  | 0.13 |
|              |                   | CD74 molecule, major histocompatibility complex,                |        |      |
| 1567627_at   | <b>CD74</b>       | 972 class II invariant chain                                    | 2.72   | 0.00 |
| 1554519_at   | <b>CD80</b>       | 941 CD80 molecule                                               | 6.48   | 0.00 |
| 203904_x_at  | <b>CD82</b>       | 3732 CD82 molecule                                              | 4.42   | 0.06 |

|             |                 |                                                                                                                                          |        |      |
|-------------|-----------------|------------------------------------------------------------------------------------------------------------------------------------------|--------|------|
| 204440_at   | <b>CD83</b>     | 9308 CD83 molecule                                                                                                                       | 60.66  | 0.00 |
| 202878_s_at | <b>CD93</b>     | 22918 CD93 molecule                                                                                                                      | -2.07  | 0.13 |
| 202910_s_at | <b>CD97</b>     | 976 CD97 molecule                                                                                                                        | -3.17  | 0.06 |
| 205627_at   | <b>CDA</b>      | 978 cytidine deaminase                                                                                                                   | -14.02 | 0.22 |
| 201725_at   | <b>CDC123</b>   | 8872 cell division cycle 123 homolog (S. cerevisiae)<br>CDC14 cell division cycle 14 homolog A (S. cerevisiae)                           | -4.75  | 0.00 |
| 210441_at   | <b>CDC14A</b>   | 8556 cerevisiae)                                                                                                                         | 2.09   | 0.22 |
| 212899_at   | <b>CDC2L6</b>   | 23097 cell division cycle 2-like 6 (CDK8-like)                                                                                           | -3.59  | 0.10 |
| 212540_at   | <b>CDC34</b>    | 997 cell division cycle 34 homolog (S. cerevisiae)                                                                                       | -2.96  | 0.58 |
| 203376_at   | <b>CDC40</b>    | 51362 cell division cycle 40 homolog (S. cerevisiae)                                                                                     | -2.11  | 0.13 |
| 203968_s_at | <b>CDC6</b>     | 990 cell division cycle 6 homolog (S. cerevisiae)                                                                                        | 3.46   | 0.00 |
| 226056_at   | <b>CDGAP</b>    | 57514 Cdc42 GTPase-activating protein                                                                                                    | 16.03  | 0.00 |
| 203440_at   | <b>CDH2</b>     | 1000 cadherin 2, type 1, N-cadherin (neuronal)<br>CDP-diacylglycerol--inositol 3-phosphatidyltransferase (phosphatidylinositol synthase) | -2.70  | 0.13 |
| 201253_s_at | <b>CDIPT</b>    | 10423 synthase)                                                                                                                          | -4.53  | 0.00 |
| 211804_s_at | <b>CDK2</b>     | 1017 cyclin-dependent kinase 2                                                                                                           | 2.33   | 0.37 |
| 201938_at   | <b>CDK2AP1</b>  | 8099 CDK2-associated protein 1                                                                                                           | -6.89  | 0.00 |
| 218740_s_at | <b>CDK5RAP3</b> | 80279 CDK5 regulatory subunit associated protein 3                                                                                       | -2.68  | 0.22 |
| 202284_s_at | <b>CDKN1A</b>   | 1026 cyclin-dependent kinase inhibitor 1A (p21, Cip1)                                                                                    | 42.61  | 0.00 |
| 209112_at   | <b>CDKN1B</b>   | 1027 cyclin-dependent kinase inhibitor 1B (p27, Kip1)                                                                                    | -4.90  | 0.00 |
| 218929_at   | <b>CDKN2AIP</b> | 55602 CDKN2A interacting protein<br>carcinoembryonic antigen-related cell adhesion molecule 1 (biliary glycoprotein)                     | -4.06  | 0.58 |
| 209498_at   | <b>CEACAM1</b>  | 634 molecule 1 (biliary glycoprotein)<br>carcinoembryonic antigen-related cell adhesion molecule 8                                       | 2.77   | 0.03 |
| 206676_at   | <b>CEACAM8</b>  | 1088 molecule 8                                                                                                                          | -3.25  | 0.22 |
| 203973_s_at | <b>CEBPD</b>    | 1052 CCAAT/enhancer binding protein (C/EBP), delta                                                                                       | -2.41  | 0.00 |
| 203341_at   | <b>CEBPZ</b>    | 10153 CCAAT/enhancer binding protein zeta                                                                                                | 2.54   | 0.37 |
| 231772_x_at | <b>CENPH</b>    | 64946 centromere protein H                                                                                                               | 2.07   | 0.58 |
| 205212_s_at | <b>CENTB1</b>   | 9744 centaurin, beta 1                                                                                                                   | -3.30  | 0.00 |
| 213618_at   | <b>CENTD1</b>   | 116984 centaurin, delta 1                                                                                                                | 3.29   | 0.22 |
| 218950_at   | <b>CENTD3</b>   | 64411 centaurin, delta 3                                                                                                                 | -2.20  | 0.06 |
| 225789_at   | <b>CENTG3</b>   | 116988 centaurin, gamma 3                                                                                                                | 5.29   | 0.00 |
| 207719_x_at | <b>CEP170</b>   | 9859 centrosomal protein 170kDa                                                                                                          | 2.66   | 0.58 |
| 222151_s_at | <b>CEP63</b>    | 80254 centrosomal protein 63kDa                                                                                                          | -7.34  | 0.00 |
| 212675_s_at | <b>CEP68</b>    | 23177 centrosomal protein 68kDa                                                                                                          | 2.11   | 0.13 |
| 1561884_at  | <b>CEPT1</b>    | 10390 choline/ethanolamine phosphotransferase 1                                                                                          | 3.32   | 0.58 |
| 209194_at   | <b>CETN2</b>    | 1069 centrin, EF-hand protein, 2                                                                                                         | -2.54  | 0.13 |
| 202357_s_at | <b>CFB</b>      | 629 complement factor B                                                                                                                  | 34.28  | 0.00 |
| 203166_at   | <b>CFDP1</b>    | 10428 craniofacial development protein 1                                                                                                 | 2.80   | 0.00 |
| 224663_s_at | <b>CFL2</b>     | 1073 cofilin 2 (muscle)                                                                                                                  | 5.47   | 0.37 |
| 213375_s_at | <b>CG018</b>    | 90634 hypothetical gene CG018<br>coiled-coil-helix-coiled-coil-helix domain                                                              | 5.86   | 0.37 |
| 229595_at   | <b>CHCHD4</b>   | 131474 containing 4                                                                                                                      | -7.02  | 0.58 |
| 243751_at   | <b>CHD2</b>     | 1106 Chromodomain helicase DNA binding protein 2<br>chondroitin beta1,4 N-acetyltransferase                                              | -2.64  | 0.22 |
| 219049_at   | <b>ChGn</b>     | 55790 acetylgalactosaminyltransferase                                                                                                    | -5.43  | 0.06 |
| 213060_s_at | <b>CHI3L2</b>   | 1117 chitinase 3-like 2                                                                                                                  | 29.64  | 0.00 |
| 210069_at   | <b>CHKB ///</b> | 1120 /// choline kinase beta /// carnitine                                                                                               |        |      |
| 210069_at   | <b>CPT1B</b>    | 1375 palmitoyltransferase 1B (muscle)                                                                                                    | -2.33  | 0.37 |
| 218178_s_at | <b>CHMP1B</b>   | 57132 chromatin modifying protein 1B                                                                                                     | -3.56  | 0.10 |
| 202536_at   | <b>CHMP2B</b>   | 25978 chromatin modifying protein 2B<br>Cysteine and histidine-rich domain (CHORD)-                                                      | 2.29   | 0.00 |
| 239436_at   | <b>CHORDC1</b>  | 26973 containing 1                                                                                                                       | -4.05  | 0.03 |
| 221675_s_at | <b>CHPT1</b>    | 56994 choline phosphotransferase 1                                                                                                       | -5.51  | 0.00 |

|              |                     |                                                                                        |        |      |
|--------------|---------------------|----------------------------------------------------------------------------------------|--------|------|
| 206533_at    | <b>CHRNA5</b>       | 1138 cholinergic receptor, nicotinic, alpha 5 carbohydrate (N-acetylglucosamine 6-O)   | 2.13   | 0.37 |
| 206756_at    | <b>CHST7</b>        | 56548 sulfotransferase 7                                                               | 4.10   | 0.00 |
| 203044_at    | <b>CHSY1</b>        | 22856 carbohydrate (chondroitin) synthase 1                                            | -3.47  | 0.00 |
| 212784_at    | <b>CIC</b>          | 23152 capicua homolog (Drosophila)                                                     | -2.88  | 0.00 |
| 230142_s_at  | <b>CIRBP</b>        | 1153 cold inducible RNA binding protein                                                | -3.01  | 0.03 |
| 219161_s_at  | <b>CKLF</b>         | 51192 chemokine-like factor                                                            | -2.79  | 0.00 |
| 206207_at    | <b>CLC</b>          | 1178 Charcot-Leyden crystal protein claudin 11 (oligodendrocyte transmembrane protein) | -5.87  | 0.03 |
| 228335_at    | <b>CLDN11</b>       | 5010 protein)                                                                          | 6.91   | 0.58 |
| 1552398_a_at | <b>CLEC12A</b>      | 160364 C-type lectin domain family 12, member A                                        | -2.87  | 0.10 |
| 233500_x_at  | <b>CLEC2D</b>       | 29121 C-type lectin domain family 2, member D                                          | 2.62   | 0.58 |
| 1552552_s_at | <b>CLEC4C</b>       | 170482 C-type lectin domain family 4, member C                                         | -6.30  | 0.58 |
| 222934_s_at  | <b>CLEC4E</b>       | 26253 C-type lectin domain family 4, member E                                          | 2.13   | 0.00 |
| 219890_at    | <b>CLEC5A</b>       | 23601 C-type lectin domain family 5, member A                                          | 22.76  | 0.00 |
| 221881_s_at  | <b>CLIC4</b>        | 25932 chloride intracellular channel 4                                                 | 23.82  | 0.00 |
| 1558924_s_at | <b>CLIP1</b>        | 6249 CAP-GLY domain containing linker protein 1                                        | -2.36  | 0.37 |
| 204809_at    | <b>CLPX</b>         | 10845 ClpX caseinolytic peptidase X homolog (E. coli)                                  | -5.08  | 0.13 |
| 201561_s_at  | <b>CLSTN1</b>       | 22883 calyculin 1                                                                      | -2.17  | 0.37 |
| 200960_x_at  | <b>CLTA</b>         | 1211 clathrin, light chain (Lca)                                                       | 2.08   | 0.37 |
| 206284_x_at  | <b>CLTB</b>         | 1212 clathrin, light chain (Lcb)                                                       | -2.89  | 0.13 |
| 200614_at    | <b>CLTC</b>         | 1213 clathrin, heavy chain (Hc)                                                        | 2.09   | 0.10 |
| 1555738_at   | <b>CMTM1</b>        | 113540 containing 1 CKLF-like MARVEL transmembrane domain                              | -13.70 | 0.03 |
| 229967_at    | <b>CMTM2</b>        | 146225 containing 2 CNDP dipeptidase 2 (metallopeptidase M20)                          | -41.63 | 0.00 |
| 217752_s_at  | <b>CNDP2</b>        | 55748 family)                                                                          | 2.33   | 0.37 |
| 223993_s_at  | <b>CNIH4</b>        | 29097 cornichon homolog 4 (Drosophila)                                                 | -2.00  | 0.06 |
| 220739_s_at  | <b>CNNM3</b>        | 26505 cyclin M3                                                                        | -3.26  | 0.37 |
| 226153_s_at  | <b>CNOT6L</b>       | 246175 CCR4-NOT transcription complex, subunit 6-like                                  | -3.59  | 0.58 |
|              | <b>CNTNAP3 ///</b>  | contactin associated protein-like 3 ///                                                |        |      |
|              | <b>CNTNAP3B ///</b> | 389734 ///                                                                             |        |      |
|              | <b>728577 ///</b>   | 728577 ///                                                                             |        |      |
| 223796_at    | <b>LOC728577</b>    | 79937 recognition molecule Caspr3)                                                     | -23.69 | 0.13 |
| 211809_x_at  | <b>COL13A1</b>      | 1305 collagen, type XIII, alpha 1                                                      | 13.24  | 0.00 |
| 1555953_at   | <b>COL18A1</b>      | 80781 collagen, type XVIII, alpha 1                                                    | -4.63  | 0.06 |
| 209132_s_at  | <b>COMMD4</b>       | 54939 COMM domain containing 4 COP9 constitutive photomorphogenic homolog              | 3.02   | 0.00 |
| 202078_at    | <b>COPS3</b>        | 8533 subunit 3 (Arabidopsis)                                                           | -3.72  | 0.37 |
| 209083_at    | <b>CORO1A</b>       | 11151 coronin, actin binding protein, 1A                                               | -3.94  | 0.00 |
| 219040_at    | <b>CORO7</b>        | 79585 coronin 7                                                                        | -2.09  | 0.22 |
| 221059_s_at  | <b>COTL1</b>        | 23406 coactosin-like 1 (Dictyostelium) COX17 cytochrome c oxidase assembly homolog     | -3.18  | 0.00 |
| 203880_at    | <b>COX17</b>        | 10063 (S. cerevisiae) COX19 cytochrome c oxidase assembly homolog                      | 2.92   | 0.00 |
| 231831_at    | <b>COX19</b>        | 90639 (S. cerevisiae)                                                                  | -5.36  | 0.58 |
| 217451_at    | <b>COX5A</b>        | 9377 cytochrome c oxidase subunit Va                                                   | 4.71   | 0.58 |
| 204662_at    | <b>CP110</b>        | 9738 CP110 protein                                                                     | -2.21  | 0.37 |
| 229600_s_at  | <b>CPD</b>          | 1362 Carboxypeptidase D cytoplasmic polyadenylation element binding                    | 3.30   | 0.00 |
| 226939_at    | <b>CPEB2</b>        | 132864 protein 2                                                                       | -4.43  | 0.06 |
| 241706_at    | <b>CPNE8</b>        | 144402 copine VIII complement component (3b/4b) receptor 1                             | 2.52   | 0.03 |
| 208488_s_at  | <b>CR1</b>          | 1378 (Knops blood group)                                                               | -14.35 | 0.00 |

|              |                            |            |                                                     |        |      |
|--------------|----------------------------|------------|-----------------------------------------------------|--------|------|
|              |                            |            | complement component (3b/4b) receptor 1             |        |      |
|              | <b>CR1</b> /// <b>CR1L</b> | 1378 ///   | (Knops blood group) /// complement component        |        |      |
|              | ///                        | 1379 ///   | (3b/4b) receptor 1-like /// similar to complement   |        |      |
| 239205_s_at  | <b>LOC653907</b>           | 653907     | component (3b/4b) receptor 1 isoform F precursor    | -16.83 | 0.13 |
| 212345_s_at  | <b>CREB3L2</b>             | 64764      | cAMP responsive element binding protein 3-like 2    | 7.52   | 0.00 |
| 205931_s_at  | <b>CREB5</b>               | 9586       | cAMP responsive element binding protein 5           | -7.82  | 0.00 |
| 201200_at    | <b>CREG1</b>               | 8804       | cellular repressor of E1A-stimulated genes 1        | 3.43   | 0.10 |
| 209967_s_at  | <b>CREM</b>                | 1390       | cAMP responsive element modulator                   | 35.14  | 0.00 |
|              |                            |            | cysteine-rich secretory protein LCCL domain         |        |      |
| 221541_at    | <b>CRISPLD2</b>            | 83716      | containing 2                                        | -26.68 | 0.00 |
| 208303_s_at  | <b>CRLF2</b>               | 64109      | cytokine receptor-like factor 2                     | 5.32   | 0.37 |
| 205474_at    | <b>CRLF3</b>               | 51379      | cytokine receptor-like factor 3                     | -2.55  | 0.06 |
| 226307_at    | <b>CRTC2</b>               | 200186     | CREB regulated transcription coactivator 2          | 2.80   | 0.58 |
| 221139_s_at  | <b>CSAD</b>                | 51380      | cysteine sulfinic acid decarboxylase                | -9.21  | 0.22 |
|              |                            |            | colony stimulating factor 2 receptor, alpha, low-   |        |      |
| 211286_x_at  | <b>CSF2RA</b>              | 1438       | affinity (granulocyte-macrophage)                   | -2.21  | 0.03 |
| 207442_at    | <b>CSF3</b>                | 1440       | colony stimulating factor 3 (granulocyte)           | 66.07  | 0.00 |
| 203591_s_at  | <b>CSF3R</b>               | 1441       | colony stimulating factor 3 receptor (granulocyte)  | -3.76  | 0.00 |
| 221799_at    | <b>CSG1cA-T</b>            | 54480      | chondroitin sulfate glucuronyltransferase           | -2.02  | 0.37 |
|              |                            |            | cystatin C (amyloid angiopathy and cerebral         |        |      |
| 201360_at    | <b>CST3</b>                | 1471       | hemorrhage)                                         | -2.96  | 0.03 |
| 210140_at    | <b>CST7</b>                | 8530       | cystatin F (leukocystatin)                          | -7.28  | 0.00 |
| 204971_at    | <b>CSTA</b>                | 1475       | cystatin A (stefin A)                               | -2.08  | 0.00 |
| 201201_at    | <b>CSTB</b>                | 1476       | cystatin B (stefin B)                               | 2.00   | 0.00 |
|              |                            |            | cleavage stimulation factor, 3' pre-RNA, subunit 3, |        |      |
| 229666_s_at  | <b>CSTF3</b>               | 1479       | 77kDa                                               | 6.54   | 0.00 |
| 218923_at    | <b>CTBS</b>                | 1486       | chitobiase, di-N-acetyl-                            | -2.61  | 0.00 |
| 202521_at    | <b>CTCF</b>                | 10664      | CCCTC-binding factor (zinc finger protein)          | -2.50  | 0.03 |
|              |                            |            | CTD (carboxy-terminal domain, RNA polymerase        |        |      |
| 217844_at    | <b>CTDSP1</b>              | 58190      | II, polypeptide A) small phosphatase 1              | -2.85  | 0.03 |
|              |                            |            | CTD (carboxy-terminal domain, RNA polymerase        |        |      |
| 203445_s_at  | <b>CTDSP2</b>              | 10106      | II, polypeptide A) small phosphatase 2              | -7.10  | 0.00 |
|              |                            |            | CTD (carboxy-terminal domain, RNA polymerase        |        |      |
| 201904_s_at  | <b>CTDSPL</b>              | 10217      | II, polypeptide A) small phosphatase-like           | 2.52   | 0.13 |
|              |                            |            | CTD (carboxy-terminal domain, RNA polymerase        |        |      |
| 1555106_a_at | <b>CTDSPL2</b>             | 51496      | II, polypeptide A) small phosphatase like 2         | -4.35  | 0.37 |
|              |                            |            | CTGLF1 ///                                          |        |      |
|              | <b>CTGLF1</b> ///          | 119016 /// | centaurin, gamma-like family, member 1 ///          |        |      |
|              | <b>CTGLF3</b> ///          | 119385 /// | KIAA1975 protein similar to MRIP2 /// centaurin,    |        |      |
|              | <b>CTGLF4</b> ///          | 414189 /// | gamma-like family, member 3 /// centaurin,          |        |      |
|              | <b>CTGLF5</b> ///          | 653268 /// | gamma-like family, member 4 /// centaurin,          |        |      |
|              | <b>CTGLF9P</b> ///         | 728005 /// | gamma-like family, member 9 pseudogene ///          |        |      |
| 221850_x_at  | <b>KIAA1975</b>            | 728404     | centaurin, gamma-like family, member 5              | -3.71  | 0.58 |
| 200839_s_at  | <b>CTSB</b>                | 1508       | cathepsin B                                         | 3.31   | 0.10 |
| 201487_at    | <b>CTSC</b>                | 1075       | cathepsin C                                         | -3.26  | 0.37 |
| 200766_at    | <b>CTSD</b>                | 1509       | cathepsin D                                         | 2.16   | 0.03 |
| 202295_s_at  | <b>CTSH</b>                | 1512       | cathepsin H                                         | 4.53   | 0.37 |
| 202087_s_at  | <b>CTSL1</b>               | 1514       | cathepsin L1                                        | 62.22  | 0.00 |

|              |                                                     |                                                                                                                                        |        |      |
|--------------|-----------------------------------------------------|----------------------------------------------------------------------------------------------------------------------------------------|--------|------|
| 210074_at    | <b>CTSL2</b>                                        | 1515 cathepsin L2                                                                                                                      | 11.01  | 0.22 |
| 1555467_a_at | <b>CUGBP1</b>                                       | 10658 CUG triplet repeat, RNA binding protein 1                                                                                        | 2.89   | 0.00 |
| 202157_s_at  | <b>CUGBP2</b>                                       | 10659 CUG triplet repeat, RNA binding protein 2                                                                                        | -5.56  | 0.00 |
| 202213_s_at  | <b>CUL4B</b>                                        | 8450 cullin 4B<br>chemokine (C-X-C motif) ligand 1 (melanoma)                                                                          | -4.92  | 0.03 |
| 204470_at    | <b>CXCL1</b>                                        | 2919 growth stimulating activity, alpha)                                                                                               | 4.00   | 0.00 |
| 204533_at    | <b>CXCL10</b>                                       | 3627 chemokine (C-X-C motif) ligand 10                                                                                                 | 28.49  | 0.10 |
| 210163_at    | <b>CXCL11</b>                                       | 6373 chemokine (C-X-C motif) ligand 11                                                                                                 | 3.31   | 0.06 |
| 223454_at    | <b>CXCL16</b>                                       | 58191 chemokine (C-X-C motif) ligand 16                                                                                                | 2.39   | 0.00 |
| 209774_x_at  | <b>CXCL2</b>                                        | 2920 chemokine (C-X-C motif) ligand 2                                                                                                  | 14.67  | 0.00 |
| 207850_at    | <b>CXCL3</b>                                        | 2921 chemokine (C-X-C motif) ligand 3                                                                                                  | 185.85 | 0.22 |
| 214974_x_at  | <b>CXCL5</b>                                        | 6374 chemokine (C-X-C motif) ligand 5                                                                                                  | 78.45  | 0.37 |
| 1553457_at   | <b>CXorf62</b>                                      | 439943 chromosome X open reading frame 62                                                                                              | 2.04   | 0.22 |
| 224735_at    | <b>CYBASC3</b>                                      | 220002 cytochrome b, ascorbate dependent 3<br>cytochrome b-245, beta polypeptide (chronic                                              | 4.41   | 0.03 |
| 203922_s_at  | <b>CYBB</b>                                         | 1536 granulomatous disease)                                                                                                            | 3.70   | 0.03 |
| 214272_at    | <b>CYLD</b>                                         | 1540 cylindromatosis (turban tumor syndrome)<br>cytochrome P450, family 27, subfamily B,                                               | 4.44   | 0.00 |
| 205676_at    | <b>CYP27B1</b>                                      | 1594 polypeptide 1<br>cytochrome P450, family 4, subfamily F,                                                                          | 6.55   | 0.22 |
| 210452_x_at  | <b>CYP4F2</b>                                       | 8529 polypeptide 2<br>cytochrome P450, family 4, subfamily F,                                                                          | -7.34  | 0.00 |
| 206514_s_at  | <b>CYP4F2 ///</b><br><b>CYP4F3</b>                  | 4051 ///<br>8529 polypeptide 3 /// cytochrome P450, family 4,<br>subfamily F, polypeptide 2<br>cytochrome P450, family 4, subfamily F, | -9.49  | 0.00 |
| 206515_at    | <b>CYP4F3</b>                                       | 4051 polypeptide 3                                                                                                                     | -7.74  | 0.00 |
| 231747_at    | <b>CYSLTR1</b>                                      | 10800 cysteinyl leukotriene receptor 1                                                                                                 | -4.26  | 0.06 |
| 220813_at    | <b>CYSLTR2</b>                                      | 57105 cysteinyl leukotriene receptor 2                                                                                                 | -6.11  | 0.10 |
| 200046_at    | <b>DAD1</b>                                         | 1603 defender against cell death 1                                                                                                     | 2.33   | 0.00 |
| 201095_at    | <b>DAP</b>                                          | 1611 death-associated protein                                                                                                          | 2.74   | 0.13 |
| 206324_s_at  | <b>DAPK2</b>                                        | 23604 death-associated protein kinase 2                                                                                                | -14.57 | 0.00 |
| 201624_at    | <b>DARS</b>                                         | 1615 aspartyl-tRNA synthetase                                                                                                          | 3.00   | 0.58 |
| 223001_at    | <b>DC2</b>                                          | 58505 DC2 protein                                                                                                                      | 7.87   | 0.00 |
| 216725_at    | <b>DCLK2</b>                                        | 166614 Doublecortin-like kinase 2<br>DCP1 decapping enzyme homolog A (S.                                                               | -2.13  | 0.00 |
| 225443_at    | <b>DCP1A</b>                                        | 55802 cerevisiae)                                                                                                                      | 4.28   | 0.03 |
| 235258_at    | <b>DCP2</b>                                         | 167227 DCP2 decapping enzyme homolog (S. cerevisiae)<br>DCN1, defective in cullin neddylation 1, domain                                | -2.46  | 0.10 |
| 239648_at    | <b>DCUN1D3</b>                                      | 123879 containing 3 (S. cerevisiae)<br>development and differentiation enhancing factor                                                | 6.13   | 0.00 |
| 224796_at    | <b>DDEF1</b>                                        | 50807 1                                                                                                                                | -2.19  | 0.00 |
| 225970_at    | <b>DDHD1</b>                                        | 80821 DDHD domain containing 1                                                                                                         | 3.19   | 0.58 |
| 209383_at    | <b>DDIT3</b>                                        | 1649 DNA-damage-inducible transcript 3                                                                                                 | 2.75   | 0.00 |
| 202887_s_at  | <b>DDIT4</b>                                        | 54541 DNA-damage-inducible transcript 4                                                                                                | 15.95  | 0.00 |
| 208897_s_at  | <b>DDX18</b>                                        | 8886 DEAD (Asp-Glu-Ala-Asp) box polypeptide 18                                                                                         | 3.60   | 0.03 |
| 208152_s_at  | <b>DDX21</b>                                        | 9188 DEAD (Asp-Glu-Ala-Asp) box polypeptide 21<br>DEAD/H (Asp-Glu-Ala-Asp/His) box polypeptide                                         | 4.86   | 0.00 |
| 227485_at    | <b>DDX26B</b>                                       | 203522 26B                                                                                                                             | -4.24  | 0.03 |
| 201584_s_at  | <b>DDX39</b>                                        | 10212 DEAD (Asp-Glu-Ala-Asp) box polypeptide 39<br>differentially expressed in FDCP 6 homolog                                          | 4.92   | 0.37 |
| 226659_at    | <b>DEF6</b>                                         | 50619 (mouse)<br>differentially expressed in FDCP 8 homolog                                                                            | -16.37 | 0.37 |
| 219646_at    | <b>DEF8</b><br><b>DEFA1 ///</b><br><b>DEFA3 ///</b> | 54849 (mouse)<br>1667 ///<br>1668 /// defensin, alpha 1 /// defensin, alpha 3, neutrophil-                                             | -4.56  | 0.10 |
| 205033_s_at  | <b>LOC728358</b>                                    | 728358 specific                                                                                                                        | -3.44  | 0.03 |
| 1568377_x_at | <b>DEFB124</b>                                      | 245937 defensin, beta 124                                                                                                              | 4.23   | 0.22 |

|             |                                     |                                                                                                  |        |      |
|-------------|-------------------------------------|--------------------------------------------------------------------------------------------------|--------|------|
| 221081_s_at | <b>DENND2D</b>                      | 79961 DENN/MADD domain containing 2D                                                             | 10.43  | 0.00 |
| 212975_at   | <b>DENND3</b>                       | 22898 DENN/MADD domain containing 3                                                              | -4.40  | 0.03 |
| 214787_at   | <b>DENND4A</b>                      | 10260 DENN/MADD domain containing 4A                                                             | 8.56   | 0.13 |
| 221509_at   | <b>DENR</b>                         | 8562 density-regulated protein                                                                   | -2.16  | 0.13 |
| 222543_at   | <b>DERL1</b>                        | 79139 Der1-like domain family, member 1                                                          | 2.29   | 0.37 |
| 214198_s_at | <b>DGCR2</b>                        | 9993 DiGeorge syndrome critical region gene 2                                                    | -3.86  | 0.10 |
| 208072_s_at | <b>DGKD</b>                         | 8527 diacylglycerol kinase, delta 130kDa                                                         | -6.82  | 0.10 |
| 207556_s_at | <b>DGKZ</b>                         | 8525 diacylglycerol kinase, zeta 104kDa<br>dehydrogenase/reductase (SDR family) member           | -6.85  | 0.37 |
| 204800_s_at | <b>DHRS12</b>                       | 79758 12                                                                                         | -4.57  | 0.06 |
| 210788_s_at | <b>DHRS7</b>                        | 51635 dehydrogenase/reductase (SDR family) member 7                                              | -2.85  | 0.00 |
| 219799_s_at | <b>DHRS9</b>                        | 10170 dehydrogenase/reductase (SDR family) member 9<br>dehydrogenase E1 and transketolase domain | -9.88  | 0.00 |
| 227094_at   | <b>DHTKD1</b>                       | 55526 containing 1                                                                               | -13.39 | 0.10 |
| 203694_s_at | <b>DHX16</b>                        | 8449 DEAH (Asp-Glu-Ala-His) box polypeptide 16                                                   | -2.87  | 0.37 |
| 223138_s_at | <b>DHX36</b>                        | 170506 DEAH (Asp-Glu-Ala-His) box polypeptide 36                                                 | 3.50   | 0.06 |
| 219364_at   | <b>DHX58</b>                        | 79132 DEXH (Asp-Glu-X-His) box polypeptide 58                                                    | 4.58   | 0.37 |
| 205603_s_at | <b>DIAPH2</b>                       | 1730 diaphanous homolog 2 (Drosophila)                                                           | 5.66   | 0.00 |
| 206061_s_at | <b>DICER1</b>                       | 23405 Dicer1, Dcr-1 homolog (Drosophila)                                                         | -2.27  | 0.00 |
| 1559326_at  | <b>DIO3OS</b>                       | 64150 deiodinase, iodothyronine, type III opposite strand                                        | 2.17   | 0.00 |
| 226026_at   | <b>DIRC2</b>                        | 84925 disrupted in renal carcinoma 2                                                             | -4.23  | 0.06 |
| 231886_at   | <b>DKFZP434B</b><br><b>2016</b>     | 642780 similar to hypothetical protein LOC284701                                                 | -5.60  | 0.00 |
| 211050_x_at | <b>DKFZP434B</b><br><b>2016 ///</b> | 642780 ///                                                                                       |        |      |
|             | <b>LOC643313</b>                    | 643313 similar to hypothetical protein LOC284701                                                 | -2.19  | 0.00 |
| 235167_at   | <b>DKFZp547E</b><br><b>087</b>      | 283846 hypothetical gene LOC283846                                                               | -3.49  | 0.03 |
|             | <b>DKFZp547E</b><br><b>087 ///</b>  |                                                                                                  |        |      |
|             | <b>LOC23117 ///</b>                 |                                                                                                  |        |      |
|             | <b>LOC440345</b><br><b>///</b>      | 23117 ///                                                                                        |        |      |
|             | <b>LOC440353</b>                    | 283846 ///                                                                                       |        |      |
|             | <b>///</b>                          | 440345 /// KIAA0220-like protein /// hypothetical gene                                           |        |      |
|             | <b>LOC613037</b>                    | 440353 /// LOC283846 /// hypothetical protein LOC440345 ///                                      |        |      |
|             | <b>///</b>                          | 613037 /// nuclear pore complex interacting protein                                              |        |      |
| 211996_s_at | <b>LOC728888</b>                    | 728888 pseudogene /// similar to Protein KIAA0220                                                | 2.26   | 0.22 |
|             | <b>087 ///</b>                      |                                                                                                  |        |      |
|             | <b>LOC440345</b><br><b>///</b>      |                                                                                                  |        |      |
|             | <b>LOC440354</b><br><b>///</b>      | 23049 ///                                                                                        |        |      |
|             | <b>LOC595101</b>                    | 283846 ///                                                                                       |        |      |
|             | <b>///</b>                          | 440345 /// PI-3-kinase-related kinase SMG-1 /// hypothetical                                     |        |      |
|             | <b>LOC728423</b>                    | 440354 /// gene LOC283846 /// hypothetical protein                                               |        |      |
|             | <b>///</b>                          | 595101 /// LOC440345 /// PI-3-kinase-related kinase SMG-1                                        |        |      |
|             | <b>LOC730099</b>                    | 728423 /// pseudogene /// similar to PI-3-kinase-related                                         |        |      |
| 214984_at   | <b>/// SMG1</b>                     | 730099 kinase SMG-1                                                                              | 4.09   | 0.13 |
| 236079_at   | <b>DKFZp667E</b><br><b>0512</b>     | 202025 hypothetical protein DKFZp667E0512                                                        | -5.13  | 0.22 |
| 224740_at   | <b>DKFZP686E</b><br><b>2158</b>     | 643155 hypothetical protein LOC643155                                                            | 2.79   | 0.13 |
| 231412_at   | <b>DKFZp686L</b><br><b>14188</b>    | 441366 hypothetical gene supported by BX538329                                                   | 21.10  | 0.37 |

|             |                 |                                                                                                               |        |      |
|-------------|-----------------|---------------------------------------------------------------------------------------------------------------|--------|------|
| 224215_s_at | <b>DLL1</b>     | 28514 delta-like 1 ( <i>Drosophila</i> )                                                                      | 52.21  | 0.37 |
| 242940_x_at | <b>DLX6</b>     | 1750 distal-less homeobox 6                                                                                   | 4.08   | 0.00 |
| 212820_at   | <b>DMXL2</b>    | 23312 Dmx-like 2                                                                                              | 3.01   | 0.00 |
| 1553470_at  | <b>DNAH17</b>   | 8632 dynein, axonemal, heavy chain 17                                                                         | 12.74  | 0.37 |
| 200664_s_at | <b>DNAJB1</b>   | 3337 DnaJ (Hsp40) homolog, subfamily B, member 1                                                              | 4.89   | 0.10 |
| 223054_at   | <b>DNAJB11</b>  | 51726 DnaJ (Hsp40) homolog, subfamily B, member 11                                                            | 3.24   | 0.00 |
| 202843_at   | <b>DNAJB9</b>   | 4189 DnaJ (Hsp40) homolog, subfamily B, member 9                                                              | 13.81  | 0.00 |
| 222620_s_at | <b>DNAJC1</b>   | 64215 DnaJ (Hsp40) homolog, subfamily C, member 1                                                             | 2.76   | 0.13 |
| 205545_x_at | <b>DNAJC8</b>   | 22826 DnaJ (Hsp40) homolog, subfamily C, member 8                                                             | 4.18   | 0.58 |
| 226281_at   | <b>DNER</b>     | 92737 delta/notch-like EGF repeat containing deoxynucleotidyltransferase, terminal, interacting               | 3.05   | 0.22 |
| 202776_at   | <b>DNTTIP2</b>  | 30836 protein 2                                                                                               | 5.40   | 0.00 |
| 219279_at   | <b>DOCK10</b>   | 55619 dedicator of cytokinesis 10                                                                             | 2.32   | 0.37 |
| 226875_at   | <b>DOCK11</b>   | 139818 dedicator of cytokinesis 11                                                                            | -4.24  | 0.03 |
| 213160_at   | <b>DOCK2</b>    | 1794 dedicator of cytokinesis 2                                                                               | -3.03  | 0.10 |
| 244840_x_at | <b>DOCK4</b>    | 9732 dedicator of cytokinesis 4                                                                               | 10.75  | 0.00 |
| 219921_s_at | <b>DOCK5</b>    | 80005 dedicator of cytokinesis 5                                                                              | -2.74  | 0.00 |
| 232843_s_at | <b>DOCK8</b>    | 81704 dedicator of cytokinesis 8                                                                              | -2.99  | 0.00 |
| 212538_at   | <b>DOCK9</b>    | 23348 dedicator of cytokinesis 9                                                                              | -3.93  | 0.58 |
| 219452_at   | <b>DPEP2</b>    | 64174 dipeptidase 2                                                                                           | -20.91 | 0.00 |
| 225633_at   | <b>DPY19L3</b>  | 147991 dpy-19-like 3 ( <i>C. elegans</i> )                                                                    | -4.31  | 0.37 |
| 218627_at   | <b>DRAM</b>     | 55332 damage-regulated autophagy modulator                                                                    | 4.59   | 0.00 |
| 218854_at   | <b>DSE</b>      | 29940 dermatan sulfate epimerase<br>D-tyrosyl-tRNA deacylase 1 homolog ( <i>S.</i>                            | 3.89   | 0.00 |
| 234107_s_at | <b>DTD1</b>     | 92675 cerevisiae)                                                                                             | -15.28 | 0.00 |
| 223445_at   | <b>DTNBP1</b>   | 84062 dystrobrevin binding protein 1                                                                          | 2.44   | 0.58 |
| 215501_s_at | <b>DUSP10</b>   | 11221 dual specificity phosphatase 10                                                                         | 34.26  | 0.00 |
| 224336_s_at | <b>DUSP16</b>   | 80824 dual specificity phosphatase 16                                                                         | 4.20   | 0.00 |
| 204794_at   | <b>DUSP2</b>    | 1844 dual specificity phosphatase 2                                                                           | 33.19  | 0.06 |
| 218845_at   | <b>DUSP22</b>   | 56940 dual specificity phosphatase 22                                                                         | -5.83  | 0.58 |
| 223402_at   | <b>DUSP23</b>   | 54935 dual specificity phosphatase 23<br>dual specificity phosphatase 3 ( <i>vaccinia virus</i>               | -4.11  | 0.22 |
| 201537_s_at | <b>DUSP3</b>    | 1845 phosphatase VH1-related)                                                                                 | 2.67   | 0.03 |
| 209457_at   | <b>DUSP5</b>    | 1847 dual specificity phosphatase 5                                                                           | 22.59  | 0.13 |
| 208956_x_at | <b>DUT</b>      | 1854 dUTP pyrophosphatase                                                                                     | -2.98  | 0.37 |
| 217976_s_at | <b>DYNC1LI1</b> | 51143 dynein, cytoplasmic 1, light intermediate chain 1<br>dual-specificity tyrosine-(Y)-phosphorylation      | -2.74  | 0.10 |
| 210151_s_at | <b>DYRK3</b>    | 8444 regulated kinase 3<br>dysferlin, limb girdle muscular dystrophy 2B                                       | 3.04   | 0.13 |
| 218660_at   | <b>DYSF</b>     | 8291 (autosomal recessive)                                                                                    | -2.90  | 0.22 |
| 226952_at   | <b>EAF1</b>     | 85403 ELL associated factor 1                                                                                 | 3.96   | 0.00 |
| 202623_at   | <b>EAPP</b>     | 55837 E2F-associated phosphoprotein                                                                           | -4.32  | 0.22 |
| 219424_at   | <b>EBI3</b>     | 10148 Epstein-Barr virus induced gene 3                                                                       | 16.95  | 0.58 |
| 219974_x_at | <b>ECHDC1</b>   | 55862 enoyl Coenzyme A hydratase domain containing 1<br>endothelial differentiation, lysophosphatidic acid G- | -2.44  | 0.22 |
| 206437_at   | <b>EDG6</b>     | 8698 protein-coupled receptor, 6                                                                              | -18.49 | 0.03 |
| 222802_at   | <b>EDN1</b>     | 1906 endothelin 1                                                                                             | 89.15  | 0.00 |
| 225545_at   | <b>EEF2K</b>    | 29904 eukaryotic elongation factor-2 kinase                                                                   | -7.07  | 0.22 |
| 233375_at   | <b>EFCAB2</b>   | 84288 EF-hand calcium binding domain 2                                                                        | -5.22  | 0.37 |
| 220523_at   | <b>EFHC2</b>    | 80258 EF-hand domain (C-terminal) containing 2                                                                | -4.51  | 0.10 |

|              |                    |                                                            |        |      |
|--------------|--------------------|------------------------------------------------------------|--------|------|
|              |                    | elongation factor Tu GTP binding domain                    |        |      |
| 218973_at    | <b>EFTUD1</b>      | 79631 containing 1                                         | 2.09   | 0.22 |
| 221497_x_at  | <b>EGLN1</b>       | 54583 egl nine homolog 1 (C. elegans)                      | -14.90 | 0.00 |
| 206115_at    | <b>EGR3</b>        | 1960 early growth response 3                               | 15.46  | 0.03 |
| 209037_s_at  | <b>EHD1</b>        | 10938 EH-domain containing 1                               | 2.95   | 0.37 |
| 209536_s_at  | <b>EHD4</b>        | 30844 EH-domain containing 4                               | 5.17   | 0.03 |
|              |                    | eukaryotic translation initiation factor 1A, X-linked      |        |      |
|              | <b>EIF1AP1</b> /// | 1964 ///                                                   |        |      |
|              | <b>EIF1AX</b>      | 280661 pseudogene 1                                        | 2.16   | 0.37 |
| 201019_s_at  | <b>EIF1B</b>       | 10289 Eukaryotic translation initiation factor 1B          | 2.66   | 0.00 |
| 237988_at    | <b>EIF1B</b>       | 10289 Eukaryotic translation initiation factor 1B          | 2.66   | 0.00 |
| 227930_at    | <b>EIF2C4</b>      | 192670 eukaryotic translation initiation factor 2C, 4      | -5.51  | 0.00 |
|              |                    | eukaryotic translation initiation factor 2, subunit 1      |        |      |
| 201144_s_at  | <b>EIF2S1</b>      | 1965 alpha, 35kDa                                          | 3.34   | 0.37 |
|              |                    | eukaryotic translation initiation factor 2, subunit 2      |        |      |
| 208726_s_at  | <b>EIF2S2</b>      | 8894 beta, 38kDa                                           | 2.02   | 0.03 |
| 208756_at    | <b>EIF3I</b>       | 8668 eukaryotic translation initiation factor 3, subunit I | 2.64   | 0.37 |
|              |                    | eukaryotic translation initiation factor 4A, isoform       |        |      |
| 211787_s_at  | <b>EIF4A1</b>      | 1973 1                                                     | 2.62   | 0.10 |
|              |                    | eukaryotic translation initiation factor 4A, isoform       |        |      |
| 201303_at    | <b>EIF4A3</b>      | 9775 3                                                     | 2.81   | 0.06 |
|              |                    | eukaryotic translation initiation factor 4E family         |        |      |
| 238461_at    | <b>EIF4E3</b>      | 317649 member 3                                            | -3.63  | 0.00 |
| 208624_s_at  | <b>EIF4G1</b>      | 1981 eukaryotic translation initiation factor 4 gamma, 1   | 2.24   | 0.22 |
| 208708_x_at  | <b>EIF5</b>        | 1983 eukaryotic translation initiation factor 5            | 2.81   | 0.00 |
| 213757_at    | <b>EIF5A</b>       | 1984 Eukaryotic translation initiation factor 5A           | 2.06   | 0.13 |
|              |                    | ELAV (embryonic lethal, abnormal vision,                   |        |      |
| 201727_s_at  | <b>ELAVL1</b>      | 1994 Drosophila)-like 1 (Hu antigen R)                     | -2.38  | 0.37 |
| 212418_at    | <b>ELF1</b>        | 1997 E74-like factor 1 (ets domain transcription factor)   | 2.04   | 0.00 |
| 210376_x_at  | <b>ELK1</b>        | 2002 ELK1, member of ETS oncogene family                   | 3.22   | 0.22 |
| 226099_at    | <b>ELL2</b>        | 22936 elongation factor, RNA polymerase II, 2              | 4.81   | 0.00 |
| 209477_at    | <b>EMD</b>         | 2010 emerin (Emery-Dreifuss muscular dystrophy)            | 2.73   | 0.00 |
| 204398_s_at  | <b>EML2</b>        | 24139 echinoderm microtubule associated protein like 2     | 4.04   | 0.00 |
| 201324_at    | <b>EMP1</b>        | 2012 epithelial membrane protein 1                         | 10.96  | 0.58 |
|              |                    | egf-like module containing, mucin-like, hormone            |        |      |
| 207111_at    | <b>EMR1</b>        | 2015 receptor-like 1                                       | 15.85  | 0.00 |
|              |                    | egf-like module containing, mucin-like, hormone            |        |      |
| 210724_at    | <b>EMR3</b>        | 84658 receptor-like 3                                      | -3.73  | 0.00 |
| 201231_s_at  | <b>ENO1</b>        | 2023 enolase 1, (alpha)                                    | 2.03   | 0.37 |
|              |                    | ectonucleoside triphosphate diphosphohydrolase             |        |      |
| 209473_at    | <b>ENTPD1</b>      | 953 1                                                      | -9.89  | 0.00 |
| 217050_at    | <b>EPAG</b>        | 10824 early lymphoid activation protein                    | 11.81  | 0.58 |
|              |                    | erythrocyte membrane protein band 4.1                      |        |      |
| 225051_at    | <b>EPB41</b>       | 2035 (elliptocytosis 1, RH-linked)                         | -3.00  | 0.00 |
| 211776_s_at  | <b>EPB41L3</b>     | 23136 erythrocyte membrane protein band 4.1-like 3         | 9.86   | 0.37 |
| 202894_at    | <b>EPHB4</b>       | 2050 EPH receptor B4                                       | -32.52 | 0.00 |
| 202909_at    | <b>EPM2AIP1</b>    | 9852 EPM2A (laforin) interacting protein 1                 | 5.61   | 0.03 |
| 232164_s_at  | <b>EPPK1</b>       | 83481 epiplakin 1                                          | 2.90   | 0.10 |
|              |                    | epidermal growth factor receptor pathway                   |        |      |
| 217886_at    | <b>EPS15</b>       | 2060 substrate 15                                          | -3.86  | 0.03 |
| 227609_at    | <b>EPSTI1</b>      | 94240 epithelial stromal interaction 1 (breast)            | 5.83   | 0.00 |
| 1563315_s_at | <b>ERICH1</b>      | 157697 glutamate-rich 1                                    | -7.50  | 0.03 |
| 202444_s_at  | <b>ERLIN1</b>      | 10613 ER lipid raft associated 1                           | -3.23  | 0.03 |
| 222646_s_at  | <b>ERO1L</b>       | 30001 ERO1-like (S. cerevisiae)                            | -2.56  | 0.37 |
| 201574_at    | <b>ETF1</b>        | 2107 eukaryotic translation termination factor 1           | 2.69   | 0.00 |
| 219017_at    | <b>ETNK1</b>       | 55500 ethanolamine kinase 1                                | 6.47   | 0.00 |



| V-ets erythroblastosis virus E26 oncogene |                   |                                                                                                                               |        |      |
|-------------------------------------------|-------------------|-------------------------------------------------------------------------------------------------------------------------------|--------|------|
| 241193_at                                 | <b>ETS2</b>       | 2114 homolog 2 (avian)                                                                                                        | 4.41   | 0.03 |
| 230102_at                                 | <b>ETV5</b>       | 2119 Ets variant gene 5 (ets-related molecule)                                                                                | 31.47  | 0.00 |
| 235056_at                                 | <b>ETV6</b>       | 2120 ets variant gene 6 (TEL oncogene)                                                                                        | -2.78  | 0.10 |
| 221680_s_at                               | <b>ETV7</b>       | 51513 ets variant gene 7 (TEL2 oncogene)                                                                                      | 3.32   | 0.06 |
| 211742_s_at                               | <b>EVI2B</b>      | 2124 ecotropic viral integration site 2B                                                                                      | -5.39  | 0.00 |
| 208297_s_at                               | <b>EVI5</b>       | 7813 ecotropic viral integration site 5                                                                                       | -5.92  | 0.10 |
| 210011_s_at                               | <b>EWSR1</b>      | 2130 Ewing sarcoma breakpoint region 1                                                                                        | 2.31   | 0.00 |
|                                           | <b>EWSR1 ///</b>  | 2130 /// Ewing sarcoma breakpoint region 1 /// Friend                                                                         |        |      |
| 211825_s_at                               | <b>FLI1</b>       | 2313 leukemia virus integration 1                                                                                             | -11.57 | 0.00 |
| 1553907_a_at                              | <b>EXDL1</b>      | 161829 exonuclease 3'-5' domain-like 1                                                                                        | 2.30   | 0.22 |
| 226259_at                                 | <b>EXOC6</b>      | 54536 exocyst complex component 6                                                                                             | -7.72  | 0.03 |
| 58696_at                                  | <b>EXOSC4</b>     | 54512 exosome component 4                                                                                                     | 2.51   | 0.03 |
| 209202_s_at                               | <b>EXTL3</b>      | 2137 exostoses (multiple)-like 3                                                                                              | -2.43  | 0.06 |
| 226170_at                                 | <b>EYA3</b>       | 2140 eyes absent homolog 3 (Drosophila)                                                                                       | 2.35   | 0.00 |
| 203249_at                                 | <b>EZH1</b>       | 2145 enhancer of zeste homolog 1 (Drosophila)<br>coagulation factor III (thromboplastin, tissue                               | -13.09 | 0.03 |
| 204363_at                                 | <b>F3</b>         | 2152 factor)                                                                                                                  | 5.74   | 0.37 |
| 204714_s_at                               | <b>F5</b>         | 2153 coagulation factor V (proaccelerin, labile factor)                                                                       | -15.83 | 0.10 |
| 202535_at                                 | <b>FADD</b>       | 8772 Fas (TNFRSF6)-associated via death domain                                                                                | -6.20  | 0.03 |
| 226905_at                                 | <b>FAM101B</b>    | 359845 family with sequence similarity 101, member B                                                                          | -10.89 | 0.00 |
| 225436_at                                 | <b>FAM108C1</b>   | 58489 family with sequence similarity 108, member C1                                                                          | 9.96   | 0.22 |
| 227711_at                                 | <b>FAM112B</b>    | 121355 family with sequence similarity 112, member B                                                                          | 2.63   | 0.37 |
| 221249_s_at                               | <b>FAM117A</b>    | 81558 family with sequence similarity 117, member A                                                                           | -6.86  | 0.13 |
| 1555948_s_at                              | <b>FAM120A</b>    | 23196 family with sequence similarity 120A<br>family with sequence similarity 120A opposite                                   | -3.31  | 0.00 |
| 225395_s_at                               | <b>FAM120AOS</b>  | 158293 strand                                                                                                                 | -2.11  | 0.10 |
| 226443_at                                 | <b>FAM122A</b>    | 116224 family with sequence similarity 122A                                                                                   | -6.42  | 0.22 |
| 231874_at                                 | <b>FAM126B</b>    | 285172 family with sequence similarity 126, member B                                                                          | -6.23  | 0.00 |
| 218037_at                                 | <b>FAM134A</b>    | 79137 family with sequence similarity 134, member A                                                                           | -2.19  | 0.37 |
| 218532_s_at                               | <b>FAM134B</b>    | 54463 family with sequence similarity 134, member B                                                                           | 6.41   | 0.00 |
| 212697_at                                 | <b>FAM134C</b>    | 162427 family with sequence similarity 134, member C                                                                          | -2.15  | 0.06 |
|                                           | <b>FAM21A ///</b> | 387680 /// family with sequence similarity 21, member B ///                                                                   |        |      |
| 212370_x_at                               | <b>FAM21B</b>     | 55747 family with sequence similarity 21, member A                                                                            | 4.37   | 0.00 |
|                                           | <b>FAM21A ///</b> | 253725 /// family with sequence similarity 21, member B ///                                                                   |        |      |
|                                           | <b>FAM21B ///</b> | 387680 /// family with sequence similarity 21, member C ///                                                                   |        |      |
|                                           | <b>FAM21C ///</b> | 55747 /// family with sequence similarity 21, member A ///                                                                    |        |      |
| 214946_x_at                               | <b>FAM21D</b>     | 653450 family with sequence similarity 21, member D                                                                           | 3.73   | 0.00 |
|                                           | <b>FAM21C ///</b> | 253725 /// family with sequence similarity 21, member C ///                                                                   |        |      |
| 211068_x_at                               | <b>FAM21D</b>     | 653450 family with sequence similarity 21, member D                                                                           | 3.80   | 0.03 |
|                                           | <b>FAM41C ///</b> |                                                                                                                               |        |      |
|                                           | <b>MGC70863</b>   | 118433 /// ribosomal protein L23a pseudogene 7 /// family<br>/// 284593 /// with sequence similarity 41, member C /// similar |        |      |
| 232899_at                                 | <b>RPL23AP7</b>   | 284942 to RPL23AP7 protein                                                                                                    | -3.00  | 0.03 |
| 227410_at                                 | <b>FAM43A</b>     | 131583 family with sequence similarity 43, member A                                                                           | -9.87  | 0.58 |
| 225351_at                                 | <b>FAM45A</b>     | 404636 family with sequence similarity 45, member A<br>family with sequence similarity 45, member B ///                       | -9.27  | 0.00 |
|                                           | <b>FAM45A ///</b> | 404636 /// family with sequence similarity 45, member A ///                                                                   |        |      |
|                                           | <b>FAM45B ///</b> | 55855 /// similar to family with sequence similarity 45,                                                                      |        |      |
| 221804_s_at                               | <b>LOC731832</b>  | 731832 member A                                                                                                               | -10.94 | 0.00 |
| 226330_s_at                               | <b>FAM48A</b>     | 55578 family with sequence similarity 48, member A                                                                            | -3.28  | 0.37 |
| 203262_s_at                               | <b>FAM50A</b>     | 9130 family with sequence similarity 50, member A                                                                             | 2.55   | 0.37 |

|              |                                    |                                                                                                                                                                                                                                               |        |      |
|--------------|------------------------------------|-----------------------------------------------------------------------------------------------------------------------------------------------------------------------------------------------------------------------------------------------|--------|------|
| 203206_at    | <b>FAM53B</b>                      | 9679 family with sequence similarity 53, member B                                                                                                                                                                                             | -13.50 | 0.03 |
| 220147_s_at  | <b>FAM60A</b>                      | 58516 family with sequence similarity 60, member A<br>family with sequence similarity 62 (C2 domain                                                                                                                                           | 3.16   | 0.22 |
| 208858_s_at  | <b>FAM62A</b>                      | 23344 containing), member A                                                                                                                                                                                                                   | -2.99  | 0.58 |
| 221856_s_at  | <b>FAM63A</b>                      | 55793 family with sequence similarity 63, member A                                                                                                                                                                                            | -3.25  | 0.00 |
| 229764_at    | <b>FAM79B</b>                      | 285386 family with sequence similarity 79, member B                                                                                                                                                                                           | 2.11   | 0.37 |
| 229344_x_at  | <b>FAM80B</b>                      | 57494 family with sequence similarity 80, member B                                                                                                                                                                                            | 6.86   | 0.03 |
| 1564204_at   | <b>FAM91A2</b>                     | 57234 family with sequence similarity 91, member A2                                                                                                                                                                                           | -2.69  | 0.10 |
| 225132_at    | <b>FBXL3</b>                       | 26224 F-box and leucine-rich repeat protein 3                                                                                                                                                                                                 | -2.57  | 0.03 |
| 203255_at    | <b>FBXO11</b>                      | 80204 F-box protein 11                                                                                                                                                                                                                        | -5.54  | 0.58 |
| 202272_s_at  | <b>FBXO28</b>                      | 23219 F-box protein 28                                                                                                                                                                                                                        | 2.80   | 0.37 |
| 227521_at    | <b>FBXO33</b>                      | 254170 F-box protein 33                                                                                                                                                                                                                       | -3.47  | 0.37 |
| 224369_s_at  | <b>FBXO38</b>                      | 81545 F-box protein 38                                                                                                                                                                                                                        | -2.02  | 0.58 |
| 212987_at    | <b>FBXO9</b>                       | 26268 F-box protein 9                                                                                                                                                                                                                         | -3.25  | 0.13 |
| 211307_s_at  | <b>FCAR</b>                        | 2204 Fc fragment of IgA, receptor for<br>Fc fragment of IgE, high affinity I, receptor for;                                                                                                                                                   | 3.31   | 0.00 |
| 1554899_s_at | <b>FCER1G</b>                      | 2207 gamma polypeptide<br>Fc fragment of IgG, high affinity Ia, receptor                                                                                                                                                                      | 2.52   | 0.00 |
| 216950_s_at  | <b>FCGR1A</b>                      | 2209 (CD64)<br>Fc fragment of IgG, low affinity IIb, receptor                                                                                                                                                                                 | 2.08   | 0.22 |
| 210889_s_at  | <b>FCGR2B</b> ///<br><b>FCGR2C</b> | 2213 ///<br>9103 (CD32) /// Fc fragment of IgG, low affinity IIc,<br>receptor for (CD32)                                                                                                                                                      | -5.46  | 0.13 |
| 204006_s_at  | <b>FCGR3A</b> ///<br><b>FCGR3B</b> | 2214 ///<br>2215 (CD16a) /// Fc fragment of IgG, low affinity IIIb,<br>receptor (CD16b)                                                                                                                                                       | -3.58  | 0.00 |
| 218831_s_at  | <b>FCGR3C</b>                      | 2217 Fc fragment of IgG, receptor, transporter, alpha                                                                                                                                                                                         | -8.45  | 0.00 |
| 228220_at    | <b>FCHO2</b>                       | 115548 FCH domain only 2                                                                                                                                                                                                                      | -10.18 | 0.13 |
| 203620_s_at  | <b>FCHSD2</b>                      | 9873 FCH and double SH3 domains 2                                                                                                                                                                                                             | 2.78   | 0.03 |
| 205237_at    | <b>FCN1</b>                        | 2219 ficolin (collagen/fibrinogen domain containing) 1                                                                                                                                                                                        | -27.89 | 0.00 |
| 210950_s_at  | <b>FDFT1</b>                       | 2222 farnesyl-diphosphate farnesyltransferase 1                                                                                                                                                                                               | -6.93  | 0.06 |
| 227811_at    | <b>FGD3</b>                        | 89846 FYVE, RhoGEF and PH domain containing 3<br>fibroblast growth factor receptor 2 (bacteria-<br>expressed kinase, keratinocyte growth factor<br>receptor, craniofacial dysostosis 1, Crouzon<br>syndrome, Pfeiffer syndrome, Jackson-Weiss | -2.27  | 0.00 |
| 208229_at    | <b>FGFR2</b>                       | 2263 syndrome)                                                                                                                                                                                                                                | 4.23   | 0.00 |
| 204834_at    | <b>FGL2</b>                        | 10875 fibrinogen-like 2<br>fission 1 (mitochondrial outer membrane) homolog                                                                                                                                                                   | -17.40 | 0.00 |
| 218034_at    | <b>FIS1</b>                        | 51024 ( <i>S. cerevisiae</i> )                                                                                                                                                                                                                | -3.36  | 0.37 |
| 31826_at     | <b>FKBP15</b>                      | 23307 FK506 binding protein 15, 133kDa                                                                                                                                                                                                        | 2.21   | 0.37 |
| 203391_at    | <b>FKBP2</b>                       | 2286 FK506 binding protein 2, 13kDa                                                                                                                                                                                                           | 4.09   | 0.00 |
| 224856_at    | <b>FKBP5</b>                       | 2289 FK506 binding protein 5                                                                                                                                                                                                                  | -4.75  | 0.00 |
| 40850_at     | <b>FKBP8</b>                       | 23770 FK506 binding protein 8, 38kDa                                                                                                                                                                                                          | -4.43  | 0.22 |
| 1552664_at   | <b>FLCN</b>                        | 201163 folliculin                                                                                                                                                                                                                             | 3.05   | 0.00 |
| 210786_s_at  | <b>FLI1</b>                        | 2313 Friend leukemia virus integration 1                                                                                                                                                                                                      | -8.85  | 0.00 |
| 222065_s_at  | <b>FLII</b>                        | 2314 flightless I homolog ( <i>Drosophila</i> )                                                                                                                                                                                               | -3.13  | 0.10 |
| 227302_s_at  | <b>FLI1</b> ///<br><b>FLII</b> /// | 2314 ///<br>3996 flightless I homolog ( <i>Drosophila</i> ) /// lethal giant<br>larvae homolog 1 ( <i>Drosophila</i> )                                                                                                                        | -2.64  | 0.37 |
| 224318_s_at  | <b>LLGL1</b>                       | 55683 hypothetical protein FLJ10081                                                                                                                                                                                                           | 2.69   | 0.37 |
| 241627_x_at  | <b>FLJ10081</b>                    | 55701 hypothetical protein FLJ10357                                                                                                                                                                                                           | -7.02  | 0.00 |
| 217940_s_at  | <b>FLJ10357</b>                    | 55739 hypothetical protein FLJ10769                                                                                                                                                                                                           | 3.64   | 0.37 |
| 222686_s_at  | <b>FLJ10769</b>                    | 55313 hypothetical protein FLJ11151                                                                                                                                                                                                           | -13.55 | 0.00 |
| 202852_s_at  | <b>FLJ11151</b>                    | 79719 hypothetical protein FLJ11506                                                                                                                                                                                                           | 4.00   | 0.06 |
| 220912_at    | <b>FLJ11506</b>                    | 80163 hypothetical protein FLJ11827                                                                                                                                                                                                           | 2.14   | 0.13 |
| 233210_at    | <b>FLJ11827</b>                    | 388439 hypothetical LOC388439<br>hypothetical gene supported by AK022396;                                                                                                                                                                     | 3.42   | 0.37 |
| 232664_at    | <b>FLJ12120</b>                    | 400946 AK097927                                                                                                                                                                                                                               | -2.16  | 0.00 |
|              | <b>FLJ12334</b>                    |                                                                                                                                                                                                                                               |        |      |

|              |                  |                                                                                            |        |      |
|--------------|------------------|--------------------------------------------------------------------------------------------|--------|------|
| 220719_at    | <b>FLJ13769</b>  | 80079 hypothetical protein FLJ13769                                                        | 2.04   | 0.13 |
| 1555486_a_at | <b>FLJ14213</b>  | 79899 hypothetical protein FLJ14213                                                        | 6.58   | 0.13 |
| 218986_s_at  | <b>FLJ20035</b>  | 55601 hypothetical protein FLJ20035                                                        | 8.53   | 0.03 |
| 220137_at    | <b>FLJ20674</b>  | 54621 hypothetical protein FLJ20674                                                        | -4.88  | 0.37 |
| 220467_at    | <b>FLJ21272</b>  | 80100 hypothetical protein FLJ21272                                                        | 17.43  | 0.13 |
| 218454_at    | <b>FLJ22662</b>  | 79887 hypothetical protein FLJ22662                                                        | -28.38 | 0.00 |
| 220674_at    | <b>FLJ22814</b>  | 79978 hypothetical protein FLJ22814                                                        | 26.15  | 0.10 |
| 1564157_at   | <b>FLJ33544</b>  | 728283 hypothetical protein LOC728283                                                      | 4.16   | 0.13 |
| 1566760_at   | <b>FLJ34208</b>  | 401106 hypothetical gene supported by AK091527                                             | 9.37   | 0.06 |
| 1562217_at   | <b>FLJ34521</b>  | 646383 hypothetical protein LOC646383                                                      | -3.08  | 0.58 |
| 231698_at    | <b>FLJ36848</b>  | 647115 hypothetical LOC647115                                                              | 2.74   | 0.37 |
| 235235_s_at  | <b>FLJ36874</b>  | 219988 FLJ36874 protein<br>similar to Contactin-associated protein-like 3                  | 2.40   | 0.00 |
| 244065_at    | <b>FLJ37512</b>  | 643792 precursor (Cell recognition molecule Caspr3)                                        | -8.79  | 0.37 |
| 227925_at    | <b>FLJ39051</b>  | 399972 Hypothetical gene supported by AK096370                                             | -5.01  | 0.13 |
| 226207_at    | <b>FLJ39378</b>  | 353116 hypothetical protein FLJ39378                                                       | -4.23  | 0.58 |
| 243547_at    | <b>FLJ39639</b>  | 283876 hypothetical protein FLJ39639                                                       | -5.21  | 0.00 |
| 229559_at    | <b>FLJ40125</b>  | 147699 hypothetical protein FLJ40125                                                       | 2.96   | 0.37 |
| 240411_at    | <b>FLJ40243</b>  | 133558 hypothetical protein FLJ40243<br>similar to protein immuno-reactive with anti-PTH   | 2.70   | 0.22 |
| 1556183_at   | <b>FLJ40330</b>  | 645784 polyclonal antibodies                                                               | 3.69   | 0.58 |
| 200859_x_at  | <b>FLNA</b>      | 2316 filamin A, alpha (actin binding protein 280)                                          | 5.14   | 0.22 |
| 211299_s_at  | <b>FLOT2</b>     | 2319 flotillin 2                                                                           | -2.50  | 0.00 |
| 242665_at    | <b>FMNL2</b>     | 114793 formin-like 2                                                                       | 2.70   | 0.13 |
| 232249_at    | <b>FMNL3</b>     | 91010 formin-like 3                                                                        | 70.88  | 0.00 |
| 241611_s_at  | <b>FNDC3A</b>    | 22862 fibronectin type III domain containing 3A                                            | 2.90   | 0.13 |
| 218618_s_at  | <b>FNDC3B</b>    | 64778 fibronectin type III domain containing 3B                                            | 4.81   | 0.00 |
| 206371_at    | <b>FOLR3</b>     | 2352 folate receptor 3 (gamma)<br>v-fos FBJ murine osteosarcoma viral oncogene             | -12.36 | 0.00 |
| 209189_at    | <b>FOS</b>       | 2353 homolog                                                                               | -2.59  | 0.37 |
| 203734_at    | <b>FOXJ2</b>     | 55810 forkhead box J2                                                                      | 2.77   | 0.10 |
| 206708_at    | <b>FOXN2</b>     | 3344 forkhead box N2                                                                       | -4.60  | 0.03 |
| 205022_s_at  | <b>FOXN3</b>     | 1112 forkhead box N3                                                                       | -2.50  | 0.00 |
| 202724_s_at  | <b>FOXO1</b>     | 2308 forkhead box O1                                                                       | -16.81 | 0.00 |
| 204132_s_at  | <b>FOXO3</b>     | 2309 forkhead box O3<br>frequently rearranged in advanced T-cell                           | -5.29  | 0.06 |
| 219889_at    | <b>FRAT1</b>     | 10023 lymphomas<br>frequently rearranged in advanced T-cell                                | -28.81 | 0.00 |
| 209864_at    | <b>FRAT2</b>     | 23401 lymphomas 2                                                                          | -17.37 | 0.00 |
| 228233_at    | <b>FREM1</b>     | 158326 FRAS1 related extracellular matrix 1                                                | 3.58   | 0.03 |
| 204072_s_at  | <b>FRY</b>       | 10129 furry homolog (Drosophila)<br>fascin homolog 1, actin-bundling protein               | -10.90 | 0.00 |
| 210933_s_at  | <b>FSCN1</b>     | 6624 (Strongylocentrotus purpuratus)                                                       | 17.00  | 0.00 |
| 208782_at    | <b>FSTL1</b>     | 11167 follistatin-like 1                                                                   | 3.55   | 0.00 |
| 214211_at    | <b>FTH1</b> ///  | 2495 /// ferritin, heavy polypeptide 1 /// ferritin, heavy                                 |        |      |
| 212824_at    | <b>FTHL16</b>    | 2508 polypeptide-like 16                                                                   | 2.21   | 0.00 |
| 201945_at    | <b>FUBP3</b>     | 8939 far upstream element (FUSE) binding protein 3                                         | 2.25   | 0.58 |
| 201945_at    | <b>FURIN</b>     | 5045 furin (paired basic amino acid cleaving enzyme)<br>fucosyltransferase 7 (alpha (1,3)) | -2.79  | 0.58 |
| 217696_at    | <b>FUT7</b>      | 2529 fucosyltransferase)                                                                   | -18.88 | 0.00 |
| 217655_at    | <b>FXYD5</b>     | 53827 FXYP domain containing ion transport regulator 5                                     | 2.99   | 0.10 |
| 224642_at    | <b>FYTTD1</b>    | 84248 forty-two-three domain containing 1                                                  | 3.01   | 0.00 |
| 213524_s_at  | <b>G0S2</b>      | 50486 G0/G1switch 2                                                                        | 5.65   | 0.00 |
| 202275_at    | <b>G6PD</b>      | 2539 glucose-6-phosphate dehydrogenase                                                     | -2.83  | 0.06 |
| 208868_s_at  | <b>GABARAPL1</b> | 23710 GABA(A) receptor-associated protein like 1                                           | -2.10  | 0.10 |

|              |                           |                                                                                                                               |        |      |
|--------------|---------------------------|-------------------------------------------------------------------------------------------------------------------------------|--------|------|
| 213560_at    | <b>GADD45B</b>            | 4616 Growth arrest and DNA-damage-inducible, beta                                                                             | 2.96   | 0.00 |
|              | <b>GAL3ST4</b> ///        | 221914 ///                                                                                                                    |        |      |
| 239422_at    | <b>GPC2</b>               | 79690 galactose-3-O-sulfotransferase 4 /// glypican 2                                                                         | -2.50  | 0.37 |
| 211810_s_at  | <b>GALC</b>               | 2581 galactosylceramidase                                                                                                     | 3.30   | 0.13 |
| 222235_s_at  | <b>GALNACT-2</b>          | 55454 chondroitin sulfate GalNAcT-2                                                                                           | 2.34   | 0.03 |
|              |                           | UDP-N-acetyl-alpha-D-galactosamine:polypeptide                                                                                |        |      |
| 1568618_a_at | <b>GALNT1</b>             | 2589 N-acetylgalactosaminyltransferase 1 (GalNAc-T1)                                                                          | -2.81  | 0.00 |
|              |                           | UDP-N-acetyl-alpha-D-galactosamine:polypeptide                                                                                |        |      |
| 203397_s_at  | <b>GALNT3</b>             | 2591 N-acetylgalactosaminyltransferase 3 (GalNAc-T3)                                                                          | -6.23  | 0.22 |
|              |                           | UDP-N-acetyl-alpha-D-galactosamine:polypeptide                                                                                |        |      |
| 231832_at    | <b>GALNT4</b>             | 8693 N-acetylgalactosaminyltransferase 4 (GalNAc-T4)                                                                          | -3.88  | 0.37 |
|              |                           | UDP-N-acetyl-alpha-D-galactosamine:polypeptide                                                                                |        |      |
| 218313_s_at  | <b>GALNT7</b>             | 51809 N-acetylgalactosaminyltransferase 7 (GalNAc-T7)                                                                         | -3.75  | 0.13 |
| 213280_at    | <b>GARNL4</b>             | 23108 GTPase activating Rap/RanGAP domain-like 4                                                                              | -22.59 | 0.00 |
| 208693_s_at  | <b>GARS</b>               | 2617 glycyl-tRNA synthetase                                                                                                   | 2.57   | 0.00 |
| 210872_x_at  | <b>GAS7</b>               | 8522 growth arrest-specific 7                                                                                                 | 3.08   | 0.06 |
|              |                           | glucan (1,4-alpha-), branching enzyme 1<br>(glycogen branching enzyme, Andersen disease,<br>glycogen storage disease type IV) |        |      |
| 203282_at    | <b>GBE1</b>               | 2632 glycogen storage disease type IV)                                                                                        | 5.01   | 0.00 |
|              |                           | guanylate binding protein 1, interferon-inducible,                                                                            |        |      |
| 231577_s_at  | <b>GBP1</b>               | 2633 67kDa                                                                                                                    | 4.20   | 0.00 |
| 223434_at    | <b>GBP3</b>               | 2635 guanylate binding protein 3                                                                                              | 30.84  | 0.00 |
| 235574_at    | <b>GBP4</b>               | 115361 guanylate binding protein 4                                                                                            | 9.90   | 0.00 |
| 238581_at    | <b>GBP5</b>               | 115362 guanylate binding protein 5                                                                                            | 4.77   | 0.00 |
| 204224_s_at  | <b>GCH1</b>               | 2643 GTP cyclohydrolase 1 (dopa-responsive dystonia)                                                                          | 8.08   | 0.00 |
| 203925_at    | <b>GCLM</b>               | 2730 glutamate-cysteine ligase, modifier subunit<br>ganglioside-induced differentiation-associated                            | 7.21   | 0.00 |
| 226271_at    | <b>GDAP1</b>              | 54332 protein 1                                                                                                               | 2.02   | 0.37 |
|              |                           | glycerophosphodiester phosphodiesterase                                                                                       |        |      |
| 219722_s_at  | <b>GDPD3</b>              | 79153 domain containing 3                                                                                                     | -10.52 | 0.00 |
|              |                           | glycerophosphodiester phosphodiesterase                                                                                       |        |      |
| 213343_s_at  | <b>GDPD5</b>              | 81544 domain containing 5                                                                                                     | 2.98   | 0.58 |
|              |                           | golgi associated, gamma adaptin ear containing,                                                                               |        |      |
| 50277_at     | <b>GGA1</b>               | 26088 ARF binding protein 1                                                                                                   | 5.15   | 0.06 |
| 237647_at    | <b>GHRL</b>               | 51738 Ghrelin/obestatin preprohormone                                                                                         | 5.31   | 0.37 |
| 219243_at    | <b>GIMAP4</b>             | 55303 GTPase, IMAP family member 4                                                                                            | -2.80  | 0.00 |
| 218805_at    | <b>GIMAP5</b>             | 55340 GTPase, IMAP family member 5                                                                                            | 6.78   | 0.03 |
| 204982_at    | <b>GIT2</b>               | 9815 G protein-coupled receptor kinase interactor 2                                                                           | -2.79  | 0.13 |
| 223278_at    | <b>GJB2</b>               | 2706 gap junction protein, beta 2, 26kDa                                                                                      | 106.92 | 0.00 |
| 217167_x_at  | <b>GK</b>                 | 2710 glycerol kinase                                                                                                          | 2.25   | 0.00 |
|              |                           | 2710 ///                                                                                                                      |        |      |
| 216316_x_at  | <b>GK</b> /// <b>GK3P</b> | 2713 glycerol kinase /// glycerol kinase 3 pseudogene                                                                         | 2.13   | 0.00 |
| 215966_x_at  | <b>GK3P</b>               | 2713 glycerol kinase 3 pseudogene                                                                                             | 2.59   | 0.00 |
| 1553772_at   | <b>GK5</b>                | 256356 glycerol kinase 5 (putative)                                                                                           | 2.32   | 0.06 |
| 214430_at    | <b>GLA</b>                | 2717 galactosidase, alpha                                                                                                     | 3.14   | 0.06 |
| 201576_s_at  | <b>GLB1</b>               | 2720 galactosidase, beta 1                                                                                                    | -3.17  | 0.37 |
| 227525_at    | <b>GLCCI1</b>             | 113263 glucocorticoid induced transcript 1                                                                                    | -6.31  | 0.37 |
| 214085_x_at  | <b>GLIPR1</b>             | 11010 GLI pathogenesis-related 1 (glioma)                                                                                     | -15.39 | 0.00 |
| 219933_at    | <b>GLRX2</b>              | 51022 glutaredoxin 2                                                                                                          | -6.16  | 0.58 |

|              |                   |                                                                                                        |        |      |
|--------------|-------------------|--------------------------------------------------------------------------------------------------------|--------|------|
| 203159_at    | <b>GLS</b>        | 2744 glutaminase                                                                                       | 2.30   | 0.10 |
| 229770_at    | <b>GLT1D1</b>     | 144423 glycosyltransferase 1 domain containing 1                                                       | -4.48  | 0.00 |
| 209883_at    | <b>GLT25D2</b>    | 23127 glycosyltransferase 25 domain containing 2                                                       | 2.22   | 0.37 |
| 219267_at    | <b>GLTP</b>       | 51228 glycolipid transfer protein                                                                      | 3.61   | 0.13 |
| 218458_at    | <b>GMCL1</b>      | 64395 germ cell-less homolog 1 (Drosophila)                                                            | -6.78  | 0.13 |
| 204220_at    | <b>GMFG</b>       | 9535 glia maturation factor, gamma<br>guanine nucleotide binding protein (G protein),                  | -2.64  | 0.00 |
| 205349_at    | <b>GNA15</b>      | 2769 alpha 15 (Gq class)<br>guanine nucleotide binding protein (G protein),                            | 10.15  | 0.10 |
| 201040_at    | <b>GNAI2</b>      | 2771 alpha inhibiting activity polypeptide 2<br>Guanine nucleotide binding protein (G protein), q      | -2.88  | 0.03 |
| 224863_at    | <b>GNAQ</b>       | 2776 polypeptide                                                                                       | -6.20  | 0.00 |
| 200981_x_at  | <b>GNAS</b>       | 2778 GNAS complex locus<br>guanine nucleotide binding protein (G protein),                             | -3.54  | 0.00 |
| 223487_x_at  | <b>GNB4</b>       | 59345 beta polypeptide 4<br>guanine nucleotide binding protein (G protein),                            | -3.95  | 0.00 |
| 1555766_a_at | <b>GNG2</b>       | 54331 gamma 2<br>guanine nucleotide binding protein (G protein),                                       | 4.29   | 0.00 |
| 206896_s_at  | <b>GNG7</b>       | 2788 gamma 7                                                                                           | -5.66  | 0.37 |
| 203307_at    | <b>GNL1</b>       | 2794 guanine nucleotide binding protein-like 1<br>guanine nucleotide binding protein-like 2            | 2.91   | 0.13 |
| 201948_at    | <b>GNL2</b>       | 29889 (nucleolar)<br>guanine nucleotide binding protein-like 3                                         | 3.47   | 0.58 |
| 217850_at    | <b>GNL3</b>       | 26354 (nucleolar)<br>guanine nucleotide binding protein-like 3                                         | 3.24   | 0.58 |
| 222109_at    | <b>GNL3L</b>      | 54552 (nucleolar)-like                                                                                 | -2.56  | 0.58 |
| 37145_at     | <b>GPLY</b>       | 10578 granulysin                                                                                       | 8.64   | 0.37 |
| 202382_s_at  | <b>GNPDA1</b>     | 10007 glucosamine-6-phosphate deaminase 1<br>N-acetylglucosamine-1-phosphate transferase,              | 15.05  | 0.10 |
| 224887_at    | <b>GNPTG</b>      | 84572 gamma subunit<br>glucosamine (N-acetyl)-6-sulfatase (Sanfilippo                                  | 2.31   | 0.13 |
| 203676_at    | <b>GNS</b>        | 2799 disease IIID)<br>golgin-like protein /// golgi autoantigen, golgin                                | 2.36   | 0.00 |
|              | <b>GOLGA ///</b>  | 342096 /// subfamily a, 6 /// similar to Golgin subfamily A                                            |        |      |
|              | <b>GOLGA6 ///</b> | 55889 /// member 6 (Golgin linked to PML) (Golgin-like                                                 |        |      |
| 207575_at    | <b>LOC653641</b>  | 653641 protein)                                                                                        | 3.43   | 0.22 |
| 207812_s_at  | <b>GORASP2</b>    | 26003 golgi reassembly stacking protein 2, 55kDa                                                       | 2.27   | 0.13 |
| 201141_at    | <b>GPMB</b>       | 10457 glycoprotein (transmembrane) nmb                                                                 | 12.91  | 0.22 |
| 237690_at    | <b>GPR115</b>     | 221393 G protein-coupled receptor 115                                                                  | 2.08   | 0.37 |
| 223887_at    | <b>GPR132</b>     | 29933 G protein-coupled receptor 132                                                                   | 3.95   | 0.00 |
| 204137_at    | <b>GPR137B</b>    | 7107 G protein-coupled receptor 137B                                                                   | 8.14   | 0.03 |
| 208524_at    | <b>GPR15</b>      | 2838 G protein-coupled receptor 15                                                                     | 2.06   | 0.03 |
| 239533_at    | <b>GPR155</b>     | 151556 G protein-coupled receptor 155                                                                  | -3.60  | 0.06 |
| 228950_s_at  | <b>GPR177</b>     | 79971 G protein-coupled receptor 177<br>G protein-coupled receptor 37 (endothelin                      | -46.52 | 0.00 |
| 214586_at    | <b>GPR37</b>      | 2861 receptor type B-like)                                                                             | 2.36   | 0.37 |
| 223767_at    | <b>GPR84</b>      | 53831 G protein-coupled receptor 84                                                                    | 98.94  | 0.00 |
| 214091_s_at  | <b>GPX3</b>       | 2878 glutathione peroxidase 3 (plasma)<br>glutathione peroxidase 4 (phospholipid                       | 2.83   | 0.58 |
| 201106_at    | <b>GPX4</b>       | 2879 hydroperoxidase)                                                                                  | 2.38   | 0.37 |
| 244808_at    | <b>GRAMD1A</b>    | 57655 GRAM domain containing 1A                                                                        | 3.67   | 0.00 |
| 219313_at    | <b>GRAMD1C</b>    | 54762 GRAM domain containing 1C                                                                        | -30.36 | 0.00 |
| 212090_at    | <b>GRINA</b>      | glutamate receptor, ionotropic, N-methyl D-<br>2907 aspartate-associated protein 1 (glutamate binding) | 5.43   | 0.10 |
| 210981_s_at  | <b>GRK6</b>       | 2870 G protein-coupled receptor kinase 6                                                               | -3.34  | 0.22 |
| 200696_s_at  | <b>GSN</b>        | 2934 gelsolin (amyloidosis, Finnish type)                                                              | -3.25  | 0.22 |
| 1557915_s_at | <b>GSTO1</b>      | 9446 glutathione S-transferase omega 1                                                                 | 4.47   | 0.00 |

|             |                                                                                           |                                    |                                                                                                                                                                                                                                                           |        |      |
|-------------|-------------------------------------------------------------------------------------------|------------------------------------|-----------------------------------------------------------------------------------------------------------------------------------------------------------------------------------------------------------------------------------------------------------|--------|------|
| 202453_s_at | <b>GTF2H1</b>                                                                             | 2965                               | general transcription factor IIH, polypeptide 1, 62kDa                                                                                                                                                                                                    | 4.68   | 0.58 |
| 223758_s_at | <b>GTF2H2</b><br><b>GTF2I</b> ///                                                         | 2966                               | general transcription factor IIH, polypeptide 2, 44kDa                                                                                                                                                                                                    | -2.01  | 0.22 |
| 210891_s_at | <b>GTF2IP1</b> ///<br><b>LOC1000936</b> 1 ///<br><b>31</b> ///<br><b>LOC732437</b> 732437 | 10009363<br>2969<br>2970<br>732437 | general transcription factor II, i ///<br>general transcription factor II, i, pseudogene 1 ///<br>general transcription factor II, i isoform 1 ///<br>general transcription factor II, i, pseudogene<br>general transcription factor IIIC, polypeptide 6, | -2.79  | 0.00 |
| 225083_at   | <b>GTF3C6</b>                                                                             | 112495                             | alpha 35kDa                                                                                                                                                                                                                                               | 10.17  | 0.00 |
| 218238_at   | <b>GTPBP4</b>                                                                             | 23560                              | GTP binding protein 4                                                                                                                                                                                                                                     | 5.40   | 0.00 |
| 213089_at   | <b>GUSBP1</b>                                                                             | 153561                             | glucuronidase, beta pseudogene 1                                                                                                                                                                                                                          | -5.75  | 0.00 |
| 201554_x_at | <b>GYG1</b>                                                                               | 2992                               | glycogenin 1                                                                                                                                                                                                                                              | -3.12  | 0.03 |
| 202487_s_at | <b>H2AFV</b>                                                                              | 94239                              | H2A histone family, member V                                                                                                                                                                                                                              | -3.73  | 0.58 |
| 212524_x_at | <b>H2AFX</b>                                                                              | 3014                               | H2A histone family, member X                                                                                                                                                                                                                              | -2.35  | 0.13 |
| 207168_s_at | <b>H2AFY</b>                                                                              | 9555                               | H2A histone family, member Y                                                                                                                                                                                                                              | -4.81  | 0.03 |
| 200853_at   | <b>H2AFZ</b>                                                                              | 3015                               | H2A histone family, member Z                                                                                                                                                                                                                              | -3.59  | 0.00 |
| 208579_x_at | <b>H2BFS</b>                                                                              | 54145                              | H2B histone family, member S                                                                                                                                                                                                                              | -3.76  | 0.03 |
| 206643_at   | <b>HAL</b>                                                                                | 3034                               | histidine ammonia-lyase                                                                                                                                                                                                                                   | -9.64  | 0.00 |
| 207316_at   | <b>HAS1</b>                                                                               | 3036                               | hyaluronan synthase 1                                                                                                                                                                                                                                     | 32.13  | 0.22 |
| 235458_at   | <b>HAVCR2</b>                                                                             | 84868                              | hepatitis A virus cellular receptor 2                                                                                                                                                                                                                     | 6.03   | 0.37 |
| 201145_at   | <b>HAX1</b>                                                                               | 10456                              | HCLS1 associated protein X-1                                                                                                                                                                                                                              | 2.56   | 0.03 |
| 202299_s_at | <b>HBXIP</b>                                                                              | 10542                              | hepatitis B virus x interacting protein                                                                                                                                                                                                                   | -2.49  | 0.00 |
| 200886_s_at | <b>hCG_201513</b> 5223 ///<br><b>8</b> ///<br><b>PGAM1</b> 642969                         | 5223<br>642969                     | phosphoglycerate mutase 1 (brain) ///<br>phosphoglycerate mutase 1 pseudogene                                                                                                                                                                             | -2.98  | 0.00 |
| 214754_at   | <b>hCG_40738</b>                                                                          | 200424                             | hypothetical protein MGC22014                                                                                                                                                                                                                             | 3.25   | 0.00 |
| 1559050_at  | <b>HCG27</b>                                                                              | 253018                             | HLA complex group 27                                                                                                                                                                                                                                      | -19.18 | 0.13 |
| 206685_at   | <b>HCG4</b>                                                                               | 54435                              | HLA complex group 4                                                                                                                                                                                                                                       | 2.73   | 0.37 |
| 215974_at   | <b>HCG4P6</b>                                                                             | 80868                              | HLA complex group 4 pseudogene 6                                                                                                                                                                                                                          | 10.90  | 0.22 |
| 216174_at   | <b>HCRP1</b>                                                                              | 387535                             | hepatocellular carcinoma-related HCRP1                                                                                                                                                                                                                    | -3.08  | 0.37 |
| 217937_s_at | <b>HDAC7A</b>                                                                             | 51564                              | histone deacetylase 7A                                                                                                                                                                                                                                    | -3.05  | 0.00 |
| 216484_x_at | <b>HDGF</b>                                                                               | 3068                               | Hepatoma-derived growth factor (high-mobility group protein 1-like)                                                                                                                                                                                       | 6.53   | 0.00 |
| 209525_at   | <b>HDGFRP3</b>                                                                            | 50810                              | Hepatoma-derived growth factor, related protein 3                                                                                                                                                                                                         | -6.28  | 0.22 |
| 203430_at   | <b>HEBP2</b>                                                                              | 23593                              | heme binding protein 2                                                                                                                                                                                                                                    | -9.09  | 0.00 |
| 225910_at   | <b>HELZ</b>                                                                               | 9931                               | helicase with zinc finger                                                                                                                                                                                                                                 | -3.25  | 0.22 |
| 217902_s_at | <b>HERC2</b>                                                                              | 8924                               | hect domain and RLD 2                                                                                                                                                                                                                                     | -3.96  | 0.00 |
| 206183_s_at | <b>HERC3</b>                                                                              | 8916                               | hect domain and RLD 3                                                                                                                                                                                                                                     | -2.21  | 0.37 |
| 219863_at   | <b>HERC5</b>                                                                              | 51191                              | hect domain and RLD 5                                                                                                                                                                                                                                     | 3.52   | 0.03 |
| 219352_at   | <b>HERC6</b>                                                                              | 55008                              | hect domain and RLD 6                                                                                                                                                                                                                                     | 6.04   | 0.37 |
| 201765_s_at | <b>HEXA</b>                                                                               | 3073                               | hexosaminidase A (alpha polypeptide)                                                                                                                                                                                                                      | 2.06   | 0.03 |
| 238591_at   | <b>HEXDC</b>                                                                              | 284004                             | Hexosaminidase (glycosyl hydrolase family 20, catalytic domain) containing homogentisate 1,2-dioxygenase (homogentisate                                                                                                                                   | -3.75  | 0.22 |
| 214307_at   | <b>HGD</b>                                                                                | 3081                               | oxidase)                                                                                                                                                                                                                                                  | 2.03   | 0.58 |
| 215933_s_at | <b>HHEX</b>                                                                               | 3087                               | hematopoietically expressed homeobox                                                                                                                                                                                                                      | -12.00 | 0.06 |
| 225222_at   | <b>HIAT1</b>                                                                              | 64645                              | hippocampus abundant transcript 1                                                                                                                                                                                                                         | 3.11   | 0.00 |
| 223073_at   | <b>HIATL1</b>                                                                             | 84641                              | hippocampus abundant transcript-like 1 hypoxia-inducible factor 1, alpha subunit (basic                                                                                                                                                                   | -2.48  | 0.03 |
| 200989_at   | <b>HIF1A</b>                                                                              | 3091                               | helix-loop-helix transcription factor)                                                                                                                                                                                                                    | 3.26   | 0.00 |
| 218507_at   | <b>HIG2</b>                                                                               | 29923                              | hypoxia-inducible protein 2                                                                                                                                                                                                                               | 4.93   | 0.10 |
| 200093_s_at | <b>HINT1</b>                                                                              | 3094                               | histidine triad nucleotide binding protein 1                                                                                                                                                                                                              | 3.56   | 0.03 |
| 212293_at   | <b>HIPK1</b>                                                                              | 204851                             | homeodomain interacting protein kinase 1                                                                                                                                                                                                                  | -2.10  | 0.03 |
| 207764_s_at | <b>HIPK3</b>                                                                              | 10114                              | homeodomain interacting protein kinase 3                                                                                                                                                                                                                  | -2.23  | 0.00 |

|             |                   |                                                            |        |      |
|-------------|-------------------|------------------------------------------------------------|--------|------|
| 203253_s_at | <b>HISPPD1</b>    | 23262 histidine acid phosphatase domain containing 1       | -10.03 | 0.58 |
| 208569_at   | <b>HIST1H2AB</b>  | 8335 histone cluster 1, H2ab                               | -2.35  | 0.58 |
| 215071_s_at | <b>HIST1H2AC</b>  | 8334 histone cluster 1, H2ac                               | -10.73 | 0.00 |
| 214542_x_at | <b>HIST1H2AI</b>  | 8329 histone cluster 1, H2ai                               | -3.51  | 0.00 |
| 208583_x_at | <b>HIST1H2AJ</b>  | 8331 histone cluster 1, H2aj                               | -3.51  | 0.03 |
| 236193_at   | <b>HIST1H2BC</b>  | 8347 histone cluster 1, H2bc                               | -5.72  | 0.03 |
|             | <b>HIST1H2BC</b>  |                                                            |        |      |
|             | ///               | 8339 ///                                                   |        |      |
| 214455_at   | <b>HIST1H2BG</b>  | 8347 histone cluster 1, H2bg /// histone cluster 1, H2bc   | -3.37  | 0.10 |
| 209911_x_at | <b>HIST1H2BD</b>  | 3017 histone cluster 1, H2bd                               | -3.73  | 0.10 |
| 208527_x_at | <b>HIST1H2BE</b>  | 8344 histone cluster 1, H2be                               | -3.94  | 0.06 |
| 208490_x_at | <b>HIST1H2BF</b>  | 8343 histone cluster 1, H2bf                               | -3.80  | 0.03 |
| 208546_x_at | <b>HIST1H2BH</b>  | 8345 histone cluster 1, H2bh                               | -3.27  | 0.13 |
| 208523_x_at | <b>HIST1H2BI</b>  | 8346 histone cluster 1, H2bi                               | -3.17  | 0.10 |
| 214540_at   | <b>HIST1H2BO</b>  | 8348 histone cluster 1, H2bo                               | -2.24  | 0.37 |
| 214522_x_at | <b>HIST1H3D</b>   | 8351 histone cluster 1, H3d                                | -2.67  | 0.00 |
|             | <b>HIST2H2AA3</b> |                                                            |        |      |
|             | ///               | 723790 /// histone cluster 2, H2aa3 /// histone cluster 2, |        |      |
| 214290_s_at | <b>HIST2H2AA4</b> | 8337 H2aa4                                                 | -2.72  | 0.22 |
| 231681_x_at | <b>HIST3H2A</b>   | 92815 Histone cluster 3, H2a                               | -3.64  | 0.06 |
|             |                   | human immunodeficiency virus type I enhancer               |        |      |
| 204512_at   | <b>HIVEP1</b>     | 3096 binding protein 1                                     | 3.18   | 0.00 |
|             |                   | human immunodeficiency virus type I enhancer               |        |      |
| 243254_at   | <b>HIVEP2</b>     | 3097 binding protein 2                                     | 7.20   | 0.00 |
| 205936_s_at | <b>HK3</b>        | 3101 hexokinase 3 (white cell)                             | -10.03 | 0.37 |
| 205671_s_at | <b>HLA-DOB</b>    | 3112 major histocompatibility complex, class II, DO beta   | 2.61   | 0.58 |
|             |                   | major histocompatibility complex, class II, DR             |        |      |
| 208894_at   | <b>HLA-DRA</b>    | 3122 alpha                                                 | 4.49   | 0.00 |
| 214438_at   | <b>HLX</b>        | 3142 H2.0-like homeobox                                    | -4.16  | 0.00 |
| 224615_x_at | <b>HM13</b>       | 81502 histocompatibility (minor) 13                        | 2.95   | 0.00 |
| 235944_at   | <b>HMCN1</b>      | 83872 hemicentin 1                                         | 3.27   | 0.58 |
| 212597_s_at | <b>HMG2L1</b>     | 10042 high-mobility group protein 2-like 1                 | 4.60   | 0.00 |
| 206074_s_at | <b>HMGA1</b>      | 3159 high mobility group AT-hook 1                         | 3.10   | 0.13 |
| 224731_at   | <b>HMGB1</b>      | 3146 high-mobility group box 1                             | -2.19  | 0.00 |
| 208808_s_at | <b>HMGB2</b>      | 3148 high-mobility group box 2                             | -2.88  | 0.03 |
| 212873_at   | <b>HMHA1</b>      | 23526 histocompatibility (minor) HA-1                      | -2.07  | 0.06 |
| 203665_at   | <b>HMOX1</b>      | 3162 heme oxygenase (decycling) 1                          | 3.74   | 0.00 |
| 217755_at   | <b>HN1</b>        | 51155 hematological and neurological expressed 1           | -7.84  | 0.00 |
|             |                   | heterogeneous nuclear ribonucleoprotein A3                 |        |      |
| 206808_at   | <b>HNRPA3P1</b>   | 10151 pseudogene 1                                         | 2.34   | 0.03 |
| 201376_s_at | <b>HNRPF</b>      | 3185 heterogeneous nuclear ribonucleoprotein F             | 3.48   | 0.03 |
| 222264_at   | <b>HNRPUL2</b>    | 221092 heterogeneous nuclear ribonucleoprotein U-like 2    | -2.64  | 0.22 |
| 213793_s_at | <b>HOMER1</b>     | 9456 homer homolog 1 (Drosophila)                          | 2.57   | 0.22 |
|             | <b>HOM-TES-</b>   |                                                            |        |      |
|             | <b>103</b>        | 25900 hypothetical protein LOC25900                        | -5.05  | 0.58 |
| 228642_at   | <b>HOXA2</b>      | 3199 Homeobox A2                                           | -4.03  | 0.13 |
| 208224_at   | <b>HOXB1</b>      | 3211 homeobox B1                                           | 2.01   | 0.13 |
| 206697_s_at | <b>HP</b>         | 3240 haptoglobin                                           | -2.78  | 0.00 |
|             |                   | 3240 ///                                                   |        |      |
| 208470_s_at | <b>HP /// HPR</b> | 3250 haptoglobin /// haptoglobin-related protein           | -3.95  | 0.22 |
| 229204_at   | <b>HP1BP3</b>     | 50809 Heterochromatin protein 1, binding protein 3         | -3.78  | 0.00 |
| 204934_s_at | <b>HPN</b>        | 3249 hepsin (transmembrane protease, serine 1)             | 8.62   | 0.37 |
| 204544_at   | <b>HPS5</b>       | 11234 Hermansky-Pudlak syndrome 5                          | 3.91   | 0.37 |
| 216879_at   | <b>HR44</b>       | 27251 Hr44 antigen                                         | 3.04   | 0.10 |

|             |                     |                                                                                                                        |        |      |
|-------------|---------------------|------------------------------------------------------------------------------------------------------------------------|--------|------|
| 205579_at   | <b>HRH1</b>         | 3269 histamine receptor H1<br>heparan sulfate (glucosamine) 3-O-                                                       | 22.67  | 0.22 |
| 221062_at   | <b>HS3ST3B1</b>     | 9953 sulfotransferase 3B1                                                                                              | 70.12  | 0.00 |
| 217989_at   | <b>HSD17B11</b>     | 51170 hydroxysteroid (17-beta) dehydrogenase 11                                                                        | -4.43  | 0.00 |
| 201413_at   | <b>HSD17B4</b>      | 3295 hydroxysteroid (17-beta) dehydrogenase 4                                                                          | 2.15   | 0.58 |
| 209513_s_at | <b>HSDL2</b>        | 84263 hydroxysteroid dehydrogenase like 2                                                                              | -7.80  | 0.00 |
| 1552623_at  | <b>HSH2D</b>        | 84941 hematopoietic SH2 domain containing<br>heat shock protein 90kDa alpha (cytosolic), class                         | -7.49  | 0.00 |
| 211969_at   | <b>HSP90AA1</b>     | 3320 A member 1<br>heat shock protein 90kDa alpha (cytosolic), class                                                   | 2.22   | 0.00 |
| 200064_at   | <b>HSP90AB1</b>     | 3326 B member 1                                                                                                        | 2.29   | 0.22 |
| 200599_s_at | <b>HSP90B1</b>      | 7184 heat shock protein 90kDa beta (Grp94), member 1                                                                   | 4.83   | 0.00 |
| 202581_at   | <b>HSPA1B</b>       | 3304 heat shock 70kDa protein 1B<br>heat shock 70kDa protein 5 (glucose-regulated                                      | 3.37   | 0.00 |
| 211936_at   | <b>HSPA5</b>        | 3309 protein, 78kDa)                                                                                                   | 2.40   | 0.00 |
| 213418_at   | <b>HSPA6</b>        | 3310 heat shock 70kDa protein 6 (HSP70B')                                                                              | -2.43  | 0.00 |
| 200690_at   | <b>HSPA9</b>        | 3313 heat shock 70kDa protein 9 (mortalin)                                                                             | 6.72   | 0.03 |
| 219998_at   | <b>HSPC159</b>      | 29094 galectin-related protein                                                                                         | 2.23   | 0.37 |
| 221597_s_at | <b>HSPC171</b>      | 29100 HSPC171 protein                                                                                                  | 2.98   | 0.58 |
| 205133_s_at | <b>HSPE1</b>        | 3336 heat shock 10kDa protein 1 (chaperonin 10)                                                                        | 2.63   | 0.37 |
| 208744_x_at | <b>HSPH1</b>        | 10808 heat shock 105kDa/110kDa protein 1                                                                               | 3.88   | 0.22 |
| 200825_s_at | <b>HYOU1</b>        | 10525 hypoxia up-regulated 1<br>isoamyl acetate-hydrolyzing esterase 1 homolog                                         | 2.42   | 0.37 |
| 230621_at   | <b>IAH1</b>         | 285148 ( <i>S. cerevisiae</i> )                                                                                        | 2.75   | 0.00 |
| 207062_at   | <b>IAPP</b>         | 3375 islet amyloid polypeptide                                                                                         | 2.05   | 0.37 |
| 239012_at   | <b>IBRDC2</b>       | 255488 IBR domain containing 2<br>intercellular adhesion molecule 1 (CD54), human                                      | 2.46   | 0.00 |
| 202638_s_at | <b>ICAM1</b>        | 3383 rhinovirus receptor                                                                                               | 16.70  | 0.00 |
| 204949_at   | <b>ICAM3</b>        | 3385 intercellular adhesion molecule 3                                                                                 | -3.82  | 0.00 |
| 204569_at   | <b>ICK</b>          | 22858 intestinal cell (MAK-like) kinase<br>inhibitor of DNA binding 2, dominant negative                               | -2.62  | 0.58 |
| 201565_s_at | <b>ID2</b>          | 3398 helix-loop-helix protein<br>inhibitor of DNA binding 2, dominant negative                                         | 3.90   | 0.00 |
| 213931_at   | <b>ID2 /// ID2B</b> | 3398 /// 84099 helix-loop-helix protein /// inhibitor of DNA binding<br>2B, dominant negative helix-loop-helix protein | 3.34   | 0.03 |
| 201193_at   | <b>IDH1</b>         | 3417 isocitrate dehydrogenase 1 (NADP+), soluble                                                                       | -4.48  | 0.58 |
| 210014_x_at | <b>IDH3B</b>        | 3420 isocitrate dehydrogenase 3 (NAD+) beta                                                                            | -2.20  | 0.22 |
| 208881_x_at | <b>IDI1</b>         | 3422 isopentenyl-diphosphate delta isomerase 1                                                                         | -2.25  | 0.58 |
| 201631_s_at | <b>IER3</b>         | 8870 immediate early response 3                                                                                        | 2.26   | 0.00 |
| 218611_at   | <b>IER5</b>         | 51278 immediate early response 5                                                                                       | 3.98   | 0.00 |
| 202411_at   | <b>IFI27</b>        | 3429 interferon, alpha-inducible protein 27                                                                            | 6.02   | 0.03 |
| 201422_at   | <b>IFI30</b>        | 10437 interferon, gamma-inducible protein 30                                                                           | 2.61   | 0.00 |
| 214453_s_at | <b>IFI44</b>        | 10561 interferon-induced protein 44                                                                                    | 4.97   | 0.03 |
| 204415_at   | <b>IFI6</b>         | 2537 interferon, alpha-inducible protein 6                                                                             | 2.16   | 0.03 |
| 1555464_at  | <b>IFIH1</b>        | 64135 interferon induced with helicase C domain 1<br>interferon-induced protein with tetratricopeptide                 | 6.98   | 0.00 |
| 229450_at   | <b>IFIT3</b>        | 3437 repeats 3<br>interferon-induced protein with tetratricopeptide                                                    | 2.45   | 0.00 |
| 203595_s_at | <b>IFIT5</b>        | 24138 repeats 5                                                                                                        | 3.17   | 0.00 |
| 225661_at   | <b>IFNAR1</b>       | 3454 interferon (alpha, beta and omega) receptor 1                                                                     | -2.30  | 0.03 |
| 204786_s_at | <b>IFNAR2</b>       | 3455 interferon (alpha, beta and omega) receptor 2<br>intraflagellar transport 20 homolog                              | -2.37  | 0.03 |
| 210312_s_at | <b>IFT20</b>        | 90410 ( <i>Chlamydomonas</i> )<br>intraflagellar transport 57 homolog                                                  | -2.25  | 0.22 |
| 218100_s_at | <b>IFT57</b>        | 55081 ( <i>Chlamydomonas</i> )                                                                                         | 19.17  | 0.06 |
| 243358_at   | <b>IGF1R</b>        | 3480 insulin-like growth factor 1 receptor                                                                             | -14.07 | 0.10 |



|              |                |                                                         |        |      |
|--------------|----------------|---------------------------------------------------------|--------|------|
|              |                | Immunoglobulin heavy constant gamma 1 (G1m              |        |      |
| 211648_at    | <b>IGHG1</b>   | 3500 marker)                                            | 8.86   | 0.22 |
| 236249_at    | <b>IKIP</b>    | 121457 IKK interacting protein                          | -29.62 | 0.00 |
| 226680_at    | <b>IKZF5</b>   | 64376 IKAROS family zinc finger 5 (Pegasus)             | -3.11  | 0.58 |
| 207433_at    | <b>IL10</b>    | 3586 interleukin 10                                     | 41.13  | 0.10 |
| 204912_at    | <b>IL10RA</b>  | 3587 interleukin 10 receptor, alpha                     | 6.58   | 0.00 |
|              |                | interleukin 12B (natural killer cell stimulatory factor |        |      |
| 207901_at    | <b>IL12B</b>   | 3593 2, cytotoxic lymphocyte maturation factor 2, p40)  | 66.38  | 0.00 |
| 201888_s_at  | <b>IL13RA1</b> | 3597 interleukin 13 receptor, alpha 1                   | -4.35  | 0.00 |
| 207375_s_at  | <b>IL15RA</b>  | 3601 interleukin 15 receptor, alpha                     | 36.36  | 0.03 |
| 209827_s_at  | <b>IL16</b>    | 3603 interleukin 16 (lymphocyte chemoattractant factor) | -6.99  | 0.00 |
| 205707_at    | <b>IL17RA</b>  | 23765 interleukin 17 receptor A                         | -4.34  | 0.00 |
| 224283_x_at  | <b>IL18BP</b>  | 10068 interleukin 18 binding protein                    | 21.89  | 0.10 |
| 210118_s_at  | <b>IL1A</b>    | 3552 interleukin 1, alpha                               | 199.11 | 0.00 |
| 205067_at    | <b>IL1B</b>    | 3553 interleukin 1, beta                                | 3.69   | 0.00 |
| 220322_at    | <b>IL1F9</b>   | 56300 interleukin 1 family, member 9                    | 28.52  | 0.22 |
| 215561_s_at  | <b>IL1R1</b>   | 3554 interleukin 1 receptor, type I                     | 4.63   | 0.37 |
| 211372_s_at  | <b>IL1R2</b>   | 7850 interleukin 1 receptor, type II                    | -2.51  | 0.22 |
| 205227_at    | <b>IL1RAP</b>  | 3556 interleukin 1 receptor accessory protein           | -6.85  | 0.00 |
| 212659_s_at  | <b>IL1RN</b>   | 3557 interleukin 1 receptor antagonist                  | 5.53   | 0.00 |
| 220054_at    | <b>IL23A</b>   | 51561 interleukin 23, alpha subunit p19                 | 42.37  | 0.00 |
| 206341_at    | <b>IL2RA</b>   | 3559 interleukin 2 receptor, alpha                      | 45.50  | 0.03 |
|              |                | interleukin 2 receptor, gamma (severe combined          |        |      |
| 204116_at    | <b>IL2RG</b>   | 3561 immunodeficiency)                                  | 2.04   | 0.03 |
| 230966_at    | <b>IL4I1</b>   | 259307 interleukin 4 induced 1                          | 91.27  | 0.03 |
| 205207_at    | <b>IL6</b>     | 3569 interleukin 6 (interferon, beta 2)                 | 145.39 | 0.00 |
|              |                | Interleukin 6 signal transducer (gp130, oncostatin      |        |      |
| 212196_at    | <b>IL6ST</b>   | 3572 M receptor)                                        | 5.02   | 0.00 |
| 202859_x_at  | <b>IL8</b>     | 3576 interleukin 8                                      | 5.39   | 0.00 |
| 207094_at    | <b>IL8RA</b>   | 3577 interleukin 8 receptor, alpha                      | -31.73 | 0.00 |
| 207008_at    | <b>IL8RB</b>   | 3579 interleukin 8 receptor, beta                       | -7.72  | 0.00 |
| 208930_s_at  | <b>ILF3</b>    | 3609 interleukin enhancer binding factor 3, 90kDa       | 3.53   | 0.37 |
| 203126_at    | <b>IMPA2</b>   | 3613 inositol(myo)-1(or 4)-monophosphatase 2            | -31.83 | 0.00 |
| 210029_at    | <b>INDO</b>    | 3620 indoleamine-pyrrole 2,3 dioxygenase                | 38.51  | 0.00 |
| 1568638_a_at | <b>INDOL1</b>  | 169355 indoleamine-pyrrole 2,3 dioxygenase-like 1       | 100.82 | 0.03 |
| 208415_x_at  | <b>ING1</b>    | 3621 inhibitor of growth family, member 1               | -4.26  | 0.06 |
| 213544_at    | <b>ING2</b>    | 3622 Inhibitor of growth family, member 2               | -3.31  | 0.58 |
| 210511_s_at  | <b>INHBA</b>   | 3624 inhibin, beta A                                    | 14.22  | 0.22 |
| 203332_s_at  | <b>INPP5D</b>  | 3635 inositol polyphosphate-5-phosphatase, 145kDa       | -3.22  | 0.13 |
| 201627_s_at  | <b>INSIG1</b>  | 3638 insulin induced gene 1                             | 10.07  | 0.00 |
| 206502_s_at  | <b>INSM1</b>   | 3642 insulinoma-associated 1                            | 5.04   | 0.58 |
| 229632_s_at  | <b>INTS10</b>  | 55174 integrator complex subunit 10                     | -3.00  | 0.10 |
| 235283_at    | <b>INTS6</b>   | 26512 integrator complex subunit 6                      | -6.44  | 0.03 |
| 218905_at    | <b>INTS8</b>   | 55656 integrator complex subunit 8                      | -2.63  | 0.13 |
| 238488_at    | <b>IPO11</b>   | 51194 importin 11                                       | 26.29  | 0.00 |
| 219092_s_at  | <b>IPPK</b>    | 64768 inositol 1,3,4,5,6-pentakisphosphate 2-kinase     | 2.41   | 0.22 |
| 210840_s_at  | <b>IQGAP1</b>  | 8826 IQ motif containing GTPase activating protein 1    | -2.41  | 0.00 |
| 203474_at    | <b>IQGAP2</b>  | 10788 IQ motif containing GTPase activating protein 2   | -7.61  | 0.00 |
| 203907_s_at  | <b>IQSEC1</b>  | 9922 IQ motif and Sec7 domain 1                         | -3.02  | 0.00 |
| 217908_s_at  | <b>IQWD1</b>   | 55827 IQ motif and WD repeats 1                         | -2.40  | 0.00 |
| 231779_at    | <b>IRAK2</b>   | 3656 interleukin-1 receptor-associated kinase 2         | 41.74  | 0.00 |
| 1568830_at   | <b>IRAK3</b>   | 11213 Interleukin-1 receptor-associated kinase 3        | 15.20  | 0.00 |
| 208436_s_at  | <b>IRF7</b>    | 3665 interferon regulatory factor 7                     | 4.37   | 0.58 |
|              |                | iron-sulfur cluster assembly 1 homolog (S.              |        |      |
| 209274_s_at  | <b>ISCA1</b>   | 81689 cerevisiae)                                       | -5.95  | 0.37 |

|              |                       |                                                                                                     |        |      |
|--------------|-----------------------|-----------------------------------------------------------------------------------------------------|--------|------|
| 205483_s_at  | <b>ISG15</b>          | 9636 ISG15 ubiquitin-like modifier                                                                  | 4.22   | 0.06 |
| 203882_at    | <b>ISGF3G</b>         | 10379 interferon-stimulated transcription factor 3, gamma 48kDa                                     | 2.33   | 0.06 |
| 225632_s_at  | <b>ISY1 /// RAB43</b> | 339122 /// ISY1 splicing factor homolog (S. cerevisiae) /// 57461 RAB43, member RAS oncogene family | -4.40  | 0.37 |
| 206493_at    | <b>ITGA2B</b>         | 3674 integrin, alpha 2b (platelet glycoprotein IIb of IIb/IIIa complex, antigen CD41)               | -2.02  | 0.58 |
| 201656_at    | <b>ITGA6</b>          | 3655 integrin, alpha 6                                                                              | -17.44 | 0.37 |
| 205786_s_at  | <b>ITGAM</b>          | 3684 integrin, alpha M (complement component 3 receptor 3 subunit)                                  | -2.26  | 0.00 |
| 215878_at    | <b>ITGB1</b>          | 3688 integrin, beta 1 (fibronectin receptor, beta polypeptide, antigen CD29 includes MDF2, MSK12)   | 2.78   | 0.58 |
| 1555349_a_at | <b>ITGB2</b>          | 3689 integrin, beta 2 (complement component 3 receptor 3 and 4 subunit)                             | -3.91  | 0.00 |
| 205816_at    | <b>ITGB8</b>          | 3696 integrin, beta 8                                                                               | 7.87   | 0.10 |
| 210740_s_at  | <b>ITPK1</b>          | 3705 inositol 1,3,4-triphosphate 5/6 kinase                                                         | -5.43  | 0.00 |
| 203723_at    | <b>ITPKB</b>          | 3707 inositol 1,4,5-triphosphate 3-kinase B                                                         | -2.70  | 0.37 |
| 203710_at    | <b>ITPR1</b>          | 3708 inositol 1,4,5-triphosphate receptor, type 1                                                   | 5.11   | 0.00 |
| 35776_at     | <b>ITSN1</b>          | 6453 intersectin 1 (SH3 domain protein)                                                             | 3.22   | 0.00 |
| 244235_at    | <b>IVNS1ABP</b>       | 10625 influenza virus NS1A binding protein                                                          | 4.53   | 0.00 |
| 231183_s_at  | <b>JAG1</b>           | 182 Jagged 1 (Alagille syndrome)                                                                    | 37.85  | 0.00 |
| 223104_at    | <b>JAGN1</b>          | 84522 jagunal homolog 1 (Drosophila)                                                                | 3.11   | 0.10 |
| 226371_at    | <b>JARID1A</b>        | 5927 jumonji, AT rich interactive domain 1A                                                         | -3.54  | 0.06 |
| 203298_s_at  | <b>JARID2</b>         | 3720 jumonji, AT rich interactive domain 2                                                          | -3.71  | 0.00 |
| 225798_at    | <b>JAZF1</b>          | 221895 JAZF zinc finger 1                                                                           | -7.28  | 0.00 |
| 221778_at    | <b>JHDM1D</b>         | jumonji C domain-containing histone demethylase 80853 1 homolog D (S. cerevisiae)                   | -3.05  | 0.03 |
| 203205_at    | <b>JMJD2A</b>         | 9682 jumonji domain containing 2A                                                                   | -4.35  | 0.58 |
| 212496_s_at  | <b>JMJD2B</b>         | 23030 jumonji domain containing 2B                                                                  | -7.46  | 0.00 |
| 212722_s_at  | <b>JMJD6</b>          | 23210 jumonji domain containing 6                                                                   | 2.19   | 0.58 |
| 229294_at    | <b>JPH3</b>           | 57338 junctophilin 3                                                                                | 3.18   | 0.13 |
| 201464_x_at  | <b>JUN</b>            | 3725 jun oncogene                                                                                   | 2.96   | 0.13 |
| 200840_at    | <b>KARS</b>           | 3735 lysyl-tRNA synthetase                                                                          | 3.02   | 0.06 |
| 223412_at    | <b>KBTBD7</b>         | 84078 kelch repeat and BTB (POZ) domain containing 7 potassium voltage-gated channel, Shaw-related  | -12.96 | 0.03 |
| 243893_at    | <b>KCNC3</b>          | 3748 subfamily, member 3                                                                            | 3.50   | 0.22 |
| 207635_s_at  | <b>KCNH1</b>          | 3756 (eag-related), member 1                                                                        | 3.34   | 0.22 |
| 224099_at    | <b>KCNH7</b>          | potassium voltage-gated channel, subfamily H (eag-related), member 7                                | -3.12  | 0.06 |
| 221307_at    | <b>KCNIP1</b>         | 30820 Kv channel interacting protein 1                                                              | 2.47   | 0.06 |
| 204487_s_at  | <b>KCNQ1</b>          | 3784 subfamily, member 1                                                                            | -17.52 | 0.58 |
| 205737_at    | <b>KCNQ2</b>          | 3785 subfamily, member 2                                                                            | 2.76   | 0.00 |
| 233234_at    | <b>KCTD16</b>         | 57528 potassium channel tetramerisation domain containing 16                                        | 3.62   | 0.13 |
| 200698_at    | <b>KDELR2</b>         | KDEL (Lys-Asp-Glu-Leu) endoplasmic reticulum protein retention receptor 2                           | 2.76   | 0.06 |
| 203143_s_at  | <b>KIAA0040</b>       | 9674 KIAA0040                                                                                       | -2.80  | 0.00 |
| 212523_s_at  | <b>KIAA0146</b>       | 23514 KIAA0146                                                                                      | -3.03  | 0.10 |
| 201985_at    | <b>KIAA0196</b>       | 9897 KIAA0196                                                                                       | 2.67   | 0.22 |
| 209256_s_at  | <b>KIAA0265</b>       | 23008 KIAA0265 protein                                                                              | -2.08  | 0.58 |
| 222468_at    | <b>KIAA0319L</b>      | 79932 KIAA0319-like                                                                                 | -5.90  | 0.13 |
| 1558697_a_at | <b>KIAA0430</b>       | 9665 KIAA0430                                                                                       | -2.47  | 0.00 |
| 204546_at    | <b>KIAA0513</b>       | 9764 KIAA0513                                                                                       | -4.14  | 0.37 |
| 212201_at    | <b>KIAA0692</b>       | 23141 KIAA0692                                                                                      | 3.55   | 0.37 |

|             |                    |                                                                                                                                                                                                                                                                                                                                                                                                                                                                                                                            |        |      |
|-------------|--------------------|----------------------------------------------------------------------------------------------------------------------------------------------------------------------------------------------------------------------------------------------------------------------------------------------------------------------------------------------------------------------------------------------------------------------------------------------------------------------------------------------------------------------------|--------|------|
| 213118_at   | <b>KIAA0701</b>    | 23074 KIAA0701 protein                                                                                                                                                                                                                                                                                                                                                                                                                                                                                                     | -3.19  | 0.13 |
| 204157_s_at | <b>KIAA0999</b>    | 23387 KIAA0999 protein                                                                                                                                                                                                                                                                                                                                                                                                                                                                                                     | 4.10   | 0.03 |
| 212942_s_at | <b>KIAA1199</b>    | 57214 KIAA1199                                                                                                                                                                                                                                                                                                                                                                                                                                                                                                             | 69.71  | 0.00 |
| 243349_at   | <b>KIAA1324</b>    | 57535 KIAA1324                                                                                                                                                                                                                                                                                                                                                                                                                                                                                                             | -13.55 | 0.06 |
| 228984_at   | <b>KIAA1394</b>    | 57571 KIAA1394 protein                                                                                                                                                                                                                                                                                                                                                                                                                                                                                                     | -2.38  | 0.22 |
| 225922_at   | <b>KIAA1450</b>    | 57600 KIAA1450 protein                                                                                                                                                                                                                                                                                                                                                                                                                                                                                                     | 32.20  | 0.00 |
| 225506_at   | <b>KIAA1468</b>    | 57614 KIAA1468                                                                                                                                                                                                                                                                                                                                                                                                                                                                                                             | -3.12  | 0.37 |
| 233893_s_at | <b>KIAA1530</b>    | 57654 KIAA1530 protein                                                                                                                                                                                                                                                                                                                                                                                                                                                                                                     | -4.39  | 0.00 |
| 211433_x_at | <b>KIAA1539</b>    | 80256 KIAA1539                                                                                                                                                                                                                                                                                                                                                                                                                                                                                                             | -3.03  | 0.00 |
| 225703_at   | <b>KIAA1545</b>    | 57666 KIAA1545 protein                                                                                                                                                                                                                                                                                                                                                                                                                                                                                                     | -3.45  | 0.13 |
| 226155_at   | <b>KIAA1600</b>    | 57700 KIAA1600                                                                                                                                                                                                                                                                                                                                                                                                                                                                                                             | -25.98 | 0.00 |
| 231956_at   | <b>KIAA1618</b>    | 57714 KIAA1618                                                                                                                                                                                                                                                                                                                                                                                                                                                                                                             | 2.50   | 0.22 |
| 234048_s_at | <b>KIAA1632</b>    | 57724 KIAA1632                                                                                                                                                                                                                                                                                                                                                                                                                                                                                                             | 2.52   | 0.03 |
| 214723_x_at | <b>KIAA1641</b>    | 57730 KIAA1641                                                                                                                                                                                                                                                                                                                                                                                                                                                                                                             | 3.75   | 0.58 |
| 216848_at   | <b>KIAA1660</b>    | 85374 KIAA1660 protein                                                                                                                                                                                                                                                                                                                                                                                                                                                                                                     | 2.34   | 0.22 |
| 229891_x_at | <b>KIAA1704</b>    | 55425 KIAA1704                                                                                                                                                                                                                                                                                                                                                                                                                                                                                                             | 2.35   | 0.58 |
| 226599_at   | <b>KIAA1727</b>    | 85462 KIAA1727 protein                                                                                                                                                                                                                                                                                                                                                                                                                                                                                                     | 9.58   | 0.03 |
| 226909_at   | <b>KIAA1729</b>    | 85460 KIAA1729 protein                                                                                                                                                                                                                                                                                                                                                                                                                                                                                                     | -3.78  | 0.22 |
| 229878_at   | <b>KIAA1731</b>    | 85459 KIAA1731                                                                                                                                                                                                                                                                                                                                                                                                                                                                                                             | -2.06  | 0.37 |
| 226691_at   | <b>KIAA1856</b>    | 84629 KIAA1856 protein                                                                                                                                                                                                                                                                                                                                                                                                                                                                                                     | -4.86  | 0.03 |
| 227370_at   | <b>KIAA1946</b>    | 165215 KIAA1946                                                                                                                                                                                                                                                                                                                                                                                                                                                                                                            | 3.19   | 0.58 |
| 224708_at   | <b>KIAA2013</b>    | 90231 KIAA2013                                                                                                                                                                                                                                                                                                                                                                                                                                                                                                             | -3.51  | 0.03 |
| 242508_at   | <b>KIAA2018</b>    | 205717 KIAA2018                                                                                                                                                                                                                                                                                                                                                                                                                                                                                                            | 2.68   | 0.58 |
| 238490_at   | <b>KIAA2026</b>    | 158358 KIAA2026                                                                                                                                                                                                                                                                                                                                                                                                                                                                                                            | -2.19  | 0.13 |
| 230990_at   | <b>KIF13A</b>      | 63971 Kinesin family member 13A                                                                                                                                                                                                                                                                                                                                                                                                                                                                                            | -3.92  | 0.10 |
| 204411_at   | <b>KIF21B</b>      | 23046 kinesin family member 21B                                                                                                                                                                                                                                                                                                                                                                                                                                                                                            | -5.50  | 0.58 |
| 203943_at   | <b>KIF3B</b>       | 9371 kinesin family member 3B                                                                                                                                                                                                                                                                                                                                                                                                                                                                                              | 5.16   | 0.13 |
| 1557089_at  | <b>KIF5C</b>       | 3800 kinesin family member 5C                                                                                                                                                                                                                                                                                                                                                                                                                                                                                              | 33.92  | 0.00 |
| 209661_at   | <b>KIFC3</b>       | 3801 kinesin family member C3                                                                                                                                                                                                                                                                                                                                                                                                                                                                                              | 15.95  | 0.13 |
|             |                    | killer cell immunoglobulin-like receptor, two domains, long cytoplasmic tail, 1 /// killer cell immunoglobulin-like receptor, two domains, long cytoplasmic tail, 2 /// killer cell immunoglobulin-like receptor, two domains, long cytoplasmic tail, 3 /// killer cell immunoglobulin-like receptor, two domains, short cytoplasmic tail, 1 /// killer cell immunoglobulin-like receptor, two domains, short cytoplasmic tail, 2 /// killer cell immunoglobulin-like receptor, two domains, short cytoplasmic tail, 3 /// |        |      |
|             | <b>KIR2DL1 ///</b> | 115653 ///                                                                                                                                                                                                                                                                                                                                                                                                                                                                                                                 |        |      |
|             | <b>KIR2DL2 ///</b> | 3802 ///                                                                                                                                                                                                                                                                                                                                                                                                                                                                                                                   |        |      |
|             | <b>KIR2DL3 ///</b> | 3803 ///                                                                                                                                                                                                                                                                                                                                                                                                                                                                                                                   |        |      |
|             | <b>KIR2DS1 ///</b> | 3804 ///                                                                                                                                                                                                                                                                                                                                                                                                                                                                                                                   |        |      |
|             | <b>KIR2DS2 ///</b> | 3806 ///                                                                                                                                                                                                                                                                                                                                                                                                                                                                                                                   |        |      |
|             | <b>KIR2DS3 ///</b> | 3807 ///                                                                                                                                                                                                                                                                                                                                                                                                                                                                                                                   |        |      |
|             | <b>KIR2DS4 ///</b> | 3808 ///                                                                                                                                                                                                                                                                                                                                                                                                                                                                                                                   |        |      |
|             | <b>KIR2DS5 ///</b> | 3809 ///                                                                                                                                                                                                                                                                                                                                                                                                                                                                                                                   |        |      |
|             | <b>KIR3DL1 ///</b> | 3810 ///                                                                                                                                                                                                                                                                                                                                                                                                                                                                                                                   |        |      |
|             | <b>KIR3DL2 ///</b> | 3811 ///                                                                                                                                                                                                                                                                                                                                                                                                                                                                                                                   |        |      |
|             | <b>KIR3DL3 ///</b> | 3812 ///                                                                                                                                                                                                                                                                                                                                                                                                                                                                                                                   |        |      |
| 211397_x_at | <b>KIR3DS1</b>     | 3813<br>cytoplasmic tail, 3<br>killer cell immunoglobulin-like receptor, two domains, long cytoplasmic tail, 4<br>killer cell immunoglobulin-like receptor, three domains, long cytoplasmic tail, 3                                                                                                                                                                                                                                                                                                                        | 2.60   | 0.37 |
| 208426_x_at | <b>KIR2DL4</b>     | 3805<br>killer cell immunoglobulin-like receptor, three domains, long cytoplasmic tail, 3                                                                                                                                                                                                                                                                                                                                                                                                                                  | 3.30   | 0.37 |
| 216676_x_at | <b>KIR3DL3</b>     | 115653 domains, long cytoplasmic tail, 3                                                                                                                                                                                                                                                                                                                                                                                                                                                                                   | 3.09   | 0.06 |
| 220825_s_at | <b>KIRREL</b>      | 55243 kin of IRRE like (Drosophila)                                                                                                                                                                                                                                                                                                                                                                                                                                                                                        | 2.45   | 0.22 |

|              |                 |                                                                                                     |        |      |
|--------------|-----------------|-----------------------------------------------------------------------------------------------------|--------|------|
| 202393_s_at  | <b>KLF10</b>    | 7071 Kruppel-like factor 10                                                                         | 8.94   | 0.00 |
| 208467_at    | <b>KLF12</b>    | 11278 Kruppel-like factor 12                                                                        | -2.38  | 0.13 |
| 219878_s_at  | <b>KLF13</b>    | 51621 Kruppel-like factor 13                                                                        | -3.26  | 0.58 |
| 221302_at    | <b>KLF15</b>    | 28999 Kruppel-like factor 15                                                                        | 3.10   | 0.58 |
| 219371_s_at  | <b>KLF2</b>     | 10365 Kruppel-like factor 2 (lung)                                                                  | -2.74  | 0.00 |
| 222913_at    | <b>KLF3</b>     | 51274 Kruppel-like factor 3 (basic)                                                                 | -6.12  | 0.00 |
| 209211_at    | <b>KLF5</b>     | 688 Kruppel-like factor 5 (intestinal)                                                              | 6.26   | 0.10 |
| 204334_at    | <b>KLF7</b>     | 8609 Kruppel-like factor 7 (ubiquitous)                                                             | -8.92  | 0.00 |
| 208784_s_at  | <b>KLHDC3</b>   | 116138 kelch domain containing 3                                                                    | -3.32  | 0.06 |
| 219157_at    | <b>KLHL2</b>    | 11275 kelch-like 2, Mayven (Drosophila)                                                             | -2.59  | 0.06 |
| 49329_at     | <b>KLHL22</b>   | 84861 kelch-like 22 (Drosophila)                                                                    | -7.48  | 0.13 |
| 204733_at    | <b>KLK6</b>     | 5653 kallikrein-related peptidase 6                                                                 | 2.01   | 0.03 |
| 202055_at    | <b>KPNA1</b>    | 3836 karyopherin alpha 1 (importin alpha 5)<br>KRR1, small subunit (SSU) processome                 | -3.11  | 0.37 |
| 203202_at    | <b>KRR1</b>     | 11103 component, homolog (yeast)                                                                    | -5.82  | 0.00 |
| 218963_s_at  | <b>KRT23</b>    | 25984 keratin 23 (histone deacetylase inducible)                                                    | -2.61  | 0.00 |
| 235252_at    | <b>KSR1</b>     | 8844 Kinase suppressor of ras 1                                                                     | -3.42  | 0.10 |
| 244572_at    | <b>KY</b>       | 339855 kyphoscoliosis peptidase                                                                     | -5.64  | 0.00 |
| 217388_s_at  | <b>KYNU</b>     | 8942 kynureninase (L-kynurenine hydrolase)                                                          | 12.61  | 0.00 |
| 1552486_s_at | <b>LACTB</b>    | 114294 lactamase, beta                                                                              | 4.56   | 0.00 |
| 203287_at    | <b>LAD1</b>     | 3898 ladinin 1                                                                                      | 2.20   | 0.06 |
| 206486_at    | <b>LAG3</b>     | 3902 lymphocyte-activation gene 3<br>leukocyte-associated immunoglobulin-like                       | -2.00  | 0.10 |
| 207509_s_at  | <b>LAIR2</b>    | 3904 receptor 2                                                                                     | 31.93  | 0.13 |
| 216264_s_at  | <b>LAMB2</b>    | 3913 laminin, beta 2 (laminin S)                                                                    | -2.44  | 0.37 |
| 209270_at    | <b>LAMB3</b>    | 3914 laminin, beta 3                                                                                | 39.03  | 0.00 |
| 205569_at    | <b>LAMP3</b>    | 27074 lysosomal-associated membrane protein 3                                                       | 34.26  | 0.00 |
| 217933_s_at  | <b>LAP3</b>     | 51056 leucine aminopeptidase 3                                                                      | 11.40  | 0.00 |
| 215543_s_at  | <b>LARGE</b>    | 9215 like-glycosyltransferase                                                                       | 2.41   | 0.22 |
| 222212_s_at  | <b>LASS2</b>    | 29956 LAG1 homolog, ceramide synthase 2                                                             | -2.99  | 0.03 |
| 221581_s_at  | <b>LAT2</b>     | 7462 linker for activation of T cells family, member 2                                              | -2.71  | 0.00 |
| 201795_at    | <b>LBR</b>      | 3930 lamin B receptor                                                                               | -2.22  | 0.00 |
| 212531_at    | <b>LCN2</b>     | 3934 lipocalin 2 (oncogene 24p3)<br>Leo1, Paf1/RNA polymerase II complex                            | 5.72   | 0.03 |
| 235096_at    | <b>LEO1</b>     | 123169 component, homolog (S. cerevisiae)                                                           | 2.83   | 0.37 |
| 207092_at    | <b>LEP</b>      | 3952 leptin (obesity homolog, mouse)                                                                | 2.55   | 0.10 |
| 202595_s_at  | <b>LEPROTL1</b> | 23484 leptin receptor overlapping transcript-like 1                                                 | -6.75  | 0.03 |
| 201105_at    | <b>LGALS1</b>   | 3956 lectin, galactoside-binding, soluble, 1 (galectin 1)                                           | 3.93   | 0.13 |
| 208949_s_at  | <b>LGALS3</b>   | 3958 lectin, galactoside-binding, soluble, 3                                                        | 25.30  | 0.00 |
| 208934_s_at  | <b>LGALS8</b>   | 3964 lectin, galactoside-binding, soluble, 8 (galectin 8)                                           | 2.14   | 0.37 |
| 238061_at    | <b>LGI3</b>     | 203190 leucine-rich repeat LGI family, member 3                                                     | 3.02   | 0.13 |
| 201212_at    | <b>LGMN</b>     | 5641 legumain                                                                                       | 21.43  | 0.37 |
| 205876_at    | <b>LIFR</b>     | 3977 leukemia inhibitory factor receptor alpha<br>leukocyte immunoglobulin-like receptor, subfamily | 2.16   | 0.13 |
| 210660_at    | <b>LILRA1</b>   | 11024 A (with TM domain), member 1<br>leukocyte immunoglobulin-like receptor, subfamily             | -10.44 | 0.00 |
| 211102_s_at  | <b>LILRA2</b>   | 11027 A (with TM domain), member 2<br>leukocyte immunoglobulin-like receptor, subfamily             | -5.39  | 0.03 |
| 206881_s_at  | <b>LILRA3</b>   | 11026 A (without TM domain), member 3                                                               | 2.12   | 0.37 |
| 218600_at    | <b>LIMD2</b>    | 80774 LIM domain containing 2                                                                       | -9.21  | 0.00 |
| 212687_at    | <b>LIMS1</b>    | 3987 LIM and senescent cell antigen-like domains 1                                                  | 14.10  | 0.00 |
| 223800_s_at  | <b>LIMS3</b>    | 96626 LIM and senescent cell antigen-like domains 3                                                 | 17.92  | 0.22 |
| 206440_at    | <b>LIN7A</b>    | 8825 lin-7 homolog A (C. elegans)                                                                   | -10.69 | 0.00 |

|              |                     | likely ortholog of mouse lung-inducible Neutralized-            |        |      |
|--------------|---------------------|-----------------------------------------------------------------|--------|------|
| 232593_at    | <b>LINCR</b>        | 93082 related C3HC4 RING domain protein                         | 48.49  | 0.00 |
| 236163_at    | <b>LIX1</b>         | 167410 Lix1 homolog (mouse)                                     | 2.80   | 0.22 |
| 218191_s_at  | <b>LMBRD1</b>       | 55788 LMBR1 domain containing 1                                 | -4.93  | 0.00 |
| 204249_s_at  | <b>LMO2</b>         | 4005 LIM domain only 2 (rhombotin-like 1)                       | -2.44  | 0.00 |
| 209205_s_at  | <b>LMO4</b>         | 8543 LIM domain only 4                                          | -4.31  | 0.37 |
|              | <b>LOC1000497</b>   |                                                                 |        |      |
| 228647_at    | <b>16</b>           | 1E+08 unknown                                                   | 2.57   | 0.37 |
| 1553974_at   | <b>LOC128977</b>    | 128977 hypothetical protein LOC128977                           | -4.70  | 0.22 |
| 226702_at    | <b>LOC129607</b>    | 129607 hypothetical protein LOC129607                           | 4.43   | 0.00 |
| 212017_at    | <b>LOC130074</b>    | 130074 p20                                                      | 3.85   | 0.13 |
| 244289_at    | <b>LOC134466</b>    | 134466 hypothetical protein LOC134466                           | 8.94   | 0.00 |
| 238903_at    | <b>LOC137886</b>    | 137886 hypothetical protein LOC137886                           | -2.29  | 0.00 |
| 225493_at    | <b>LOC144438</b>    | 144438 hypothetical protein LOC144438                           | 2.67   | 0.06 |
| 226513_at    | <b>LOC145758</b>    | 145758 hypothetical protein LOC145758                           | -8.00  | 0.22 |
| 1558202_at   | <b>LOC145783</b>    | 145783 hypothetical protein LOC145783                           | 2.28   | 0.58 |
| 1557049_at   | <b>LOC149478</b>    | 149478 Hypothetical protein LOC149478                           | 37.54  | 0.10 |
| 229101_at    | <b>LOC150166</b>    | 150166 Hypothetical protein LOC150166                           | -3.06  | 0.00 |
| 212098_at    | <b>LOC151162</b>    | 151162 hypothetical protein LOC151162                           | -2.84  | 0.37 |
| 1560679_at   | <b>LOC151438</b>    | 151438 hypothetical protein LOC151438                           | -8.71  | 0.03 |
| 231377_at    | <b>LOC158830</b>    | 158830 similar to Ab2-183                                       | 2.77   | 0.58 |
| 1559651_at   | <b>LOC161635</b>    | 161635 similar to casein kinase I alpha                         | 2.37   | 0.22 |
| 227037_at    | <b>LOC201164</b>    | 201164 similar to CG12314 gene product                          | 4.91   | 0.03 |
| 235587_at    | <b>LOC202781</b>    | 202781 hypothetical protein LOC202781                           | 4.99   | 0.03 |
| 232034_at    | <b>LOC203274</b>    | 203274 hypothetical protein LOC203274                           | -14.01 | 0.00 |
| 1564385_at   | <b>LOC219688</b>    | 219688 hypothetical protein LOC219688                           | 3.75   | 0.22 |
|              | <b>LOC23117 ///</b> |                                                                 |        |      |
|              | <b>LOC339047</b>    |                                                                 |        |      |
|              | <b>///</b>          |                                                                 |        |      |
|              | <b>LOC642778</b>    | 23117 ///                                                       |        |      |
|              | <b>///</b>          | 339047 ///                                                      |        |      |
|              | <b>LOC642799</b>    | 642778 ///<br>KIAA0220-like protein ///<br>hypothetical protein |        |      |
|              | <b>///</b>          | 642799 ///<br>LOC339047 ///<br>similar to nuclear pore complex  |        |      |
| 215123_at    | <b>LOC728888</b>    | 728888 interacting protein ///<br>similar to Protein KIAA0220   | 3.10   | 0.06 |
| 239919_at    | <b>LOC255480</b>    | 255480 hypothetical protein LOC255480                           | 2.06   | 0.37 |
| 1563745_a_at | <b>LOC283050</b>    | 283050 hypothetical protein LOC283050                           | 16.87  | 0.06 |
| 1557113_at   | <b>LOC283588</b>    | 283588 hypothetical protein LOC283588                           | -15.31 | 0.22 |
| 1564373_a_at | <b>LOC283887</b>    | 283887 hypothetical protein LOC283887                           | -2.24  | 0.13 |
| 1558525_at   | <b>LOC283901</b>    | 283901 hypothetical protein LOC283901                           | -14.87 | 0.10 |
| 234664_at    | <b>LOC284701</b>    | 284701 hypothetical protein LOC284701                           | -4.18  | 0.10 |
| 227466_at    | <b>LOC285550</b>    | 285550 hypothetical protein LOC285550                           | -4.73  | 0.22 |
| 226159_at    | <b>LOC285636</b>    | 285636 hypothetical protein LOC285636                           | 3.95   | 0.00 |
| 1557359_at   | <b>LOC285758</b>    | 285758 hypothetical protein LOC285758                           | 64.43  | 0.13 |
| 230937_at    | <b>LOC285835</b>    | 285835 hypothetical protein LOC285835                           | -3.83  | 0.22 |
| 222662_at    | <b>LOC286044</b>    | 286044 hypothetical protein LOC286044                           | -4.50  | 0.00 |
| 241370_at    | <b>LOC286052</b>    | 286052 hypothetical protein LOC286052                           | -8.39  | 0.37 |
| 224158_s_at  | <b>LOC286144</b>    | 286144 hypothetical protein LOC286144                           | -3.36  | 0.03 |
| 238893_at    | <b>LOC338758</b>    | 338758 hypothetical protein LOC338758                           | 8.97   | 0.37 |
| 1561723_at   | <b>LOC339894</b>    | 339894 hypothetical protein LOC339894                           | 2.15   | 0.58 |

|              |                  |                                                                                                                                  |        |      |
|--------------|------------------|----------------------------------------------------------------------------------------------------------------------------------|--------|------|
|              | <b>LOC340089</b> |                                                                                                                                  |        |      |
|              | ///              |                                                                                                                                  |        |      |
|              | <b>LOC441081</b> |                                                                                                                                  |        |      |
|              | ///              |                                                                                                                                  |        |      |
|              | <b>LOC643367</b> |                                                                                                                                  |        |      |
|              | ///              |                                                                                                                                  |        |      |
|              | <b>LOC728452</b> |                                                                                                                                  |        |      |
|              | ///              |                                                                                                                                  |        |      |
|              | <b>LOC728488</b> |                                                                                                                                  |        |      |
|              | ///              |                                                                                                                                  |        |      |
|              | <b>LOC728499</b> | 340089 ///                                                                                                                       |        |      |
|              | ///              | 441081 ///                                                                                                                       |        |      |
|              | ///              | 643367 ///                                                                                                                       |        |      |
|              | <b>LOC728506</b> | 728452 ///                                                                                                                       |        |      |
|              | ///              | 728488 ///                                                                                                                       |        |      |
|              | <b>LOC728526</b> | 728499 ///                                                                                                                       |        |      |
|              | ///              | 728506 ///                                                                                                                       |        |      |
|              | <b>LOC728540</b> | 728526 /// POM121 membrane glycoprotein (rat)                                                                                    |        |      |
|              | ///              | 728540 /// pseudogene /// similar to Nuclear envelope pore                                                                       |        |      |
|              | <b>LOC728575</b> | 728575 /// membrane protein POM 121 (Pore membrane                                                                               |        |      |
| 1558011_at   | ///              | 730392 protein of 121 kDa) (P145)                                                                                                | -4.82  | 0.06 |
| 1558423_at   | <b>LOC349114</b> | 349114 hypothetical LOC349114                                                                                                    | -5.86  | 0.00 |
| 244889_at    | <b>LOC388210</b> | 388210 Similar to CG15828-PA, isoform A                                                                                          | 4.51   | 0.03 |
| 226608_at    | <b>LOC388272</b> | 388272 similar to RIKEN cDNA 4921524J17                                                                                          | 4.09   | 0.22 |
| 221878_at    | <b>LOC388969</b> | 388969 hypothetical LOC388969                                                                                                    | -2.51  | 0.37 |
| 224890_s_at  | <b>LOC389541</b> | 389541 similar to CG14977-PA                                                                                                     | -4.24  | 0.00 |
| 230815_at    | <b>LOC389765</b> | 389765 similar to KIF27C                                                                                                         | -8.38  | 0.13 |
| 217211_at    | <b>LOC390861</b> | 390861 similar to cytoplasmic beta-actin                                                                                         | -2.83  | 0.00 |
| 1558075_at   | <b>LOC399491</b> | 399491 LOC399491 protein                                                                                                         | 3.16   | 0.03 |
| 1560058_at   | <b>LOC399900</b> | 399900 hypothetical gene supported by AK093779<br>hypothetical gene supported by BC013370;                                       | 5.17   | 0.13 |
| 1561514_at   | <b>LOC400655</b> | 400655 BC034583                                                                                                                  | 2.08   | 0.22 |
| 232953_at    | <b>LOC400723</b> | 400723 hypothetical LOC400723<br>similar to HIV TAT specific factor 1; cofactor                                                  | -5.71  | 0.00 |
| 1558882_at   | <b>LOC401233</b> | 401233 required for Tat activation of HIV-1 transcription                                                                        | -3.33  | 0.37 |
| 1558345_a_at | <b>LOC439911</b> | 439911 hypothetical gene supported by NM_194304                                                                                  | -6.45  | 0.06 |
|              | <b>LOC440345</b> |                                                                                                                                  |        |      |
|              | ///              |                                                                                                                                  |        |      |
|              | <b>LOC641298</b> | 440345 /// hypothetical protein LOC440345 /// PI-3-kinase-<br>641298 /// related kinase SMG-1 - like locus /// similar to PI-3-  |        |      |
|              | ///              |                                                                                                                                  |        |      |
| 231989_s_at  | <b>LOC730099</b> | 730099 kinase-related kinase SMG-1                                                                                               | 2.18   | 0.00 |
| 215090_x_at  | <b>LOC440434</b> | 440434 hypothetical protein FLJ11822                                                                                             | -2.37  | 0.06 |
| 230796_at    | <b>LOC440900</b> | 440900 hypothetical LOC440900                                                                                                    | 5.60   | 0.58 |
| 238727_at    | <b>LOC440934</b> | 440934 Hypothetical gene supported by BC008048<br>MRNA; cDNA DKFZp686D10250 (from clone<br>DKFZp686D10250) /// Hypothetical gene | 152.50 | 0.00 |
| 1560128_x_at | <b>LOC441108</b> | 441108 supported by AK128882                                                                                                     | 2.99   | 0.03 |
| 238788_at    | <b>LOC494150</b> | 494150 prohibitin pseudogene                                                                                                     | -3.53  | 0.58 |
| 232135_at    | <b>LOC56755</b>  | 56755 hypothetical protein LOC56755                                                                                              | -5.23  | 0.13 |
|              | <b>LOC641798</b> |                                                                                                                                  |        |      |
|              | ///              |                                                                                                                                  |        |      |
| 244322_at    | <b>LOC646329</b> | 641798 /// hypothetical protein LOC641798 /// hypothetical<br>646329 LOC646329                                                   | 3.27   | 0.13 |
|              | <b>LOC641845</b> |                                                                                                                                  |        |      |
|              | ///              |                                                                                                                                  |        |      |
| 224752_at    | <b>LOC647087</b> | 641845 /// hypothetical protein LOC641845 /// hypothetical<br>647087 LOC647087                                                   | -7.98  | 0.03 |
|              | <b>LOC641912</b> |                                                                                                                                  |        |      |
|              | ///              |                                                                                                                                  |        |      |
| 238319_at    | <b>LOC644090</b> | 641912 /// hypothetical protein LOC641912 /// hypothetical<br>644090 LOC644090                                                   | 6.14   | 0.06 |
|              |                  | similar to FRG1 protein (FSHD region gene 1                                                                                      |        |      |
| 215160_x_at  | <b>LOC642236</b> | 642236 protein)                                                                                                                  | -4.00  | 0.06 |

|              |                                                                                                                                   |                                                          |                                                                                                                                                                                                                                                                                                                                                                                                          |        |      |
|--------------|-----------------------------------------------------------------------------------------------------------------------------------|----------------------------------------------------------|----------------------------------------------------------------------------------------------------------------------------------------------------------------------------------------------------------------------------------------------------------------------------------------------------------------------------------------------------------------------------------------------------------|--------|------|
| 243656_at    | <b>LOC642852</b>                                                                                                                  | 642852                                                   | hypothetical LOC642852<br>RNA binding motif protein 39 /// similar to RNA-binding region-containing protein 2                                                                                                                                                                                                                                                                                            | -2.18  | 0.13 |
| 227223_at    | <b>LOC643167</b><br>/// <b>RBM39</b>                                                                                              | 643167<br>9584                                           | /// (Hepatocellular carcinoma protein 1) (Splicing factor HCC1)                                                                                                                                                                                                                                                                                                                                          | -2.64  | 0.58 |
| 226808_at    | <b>LOC643641</b>                                                                                                                  | 643641                                                   | hypothetical protein LOC643641                                                                                                                                                                                                                                                                                                                                                                           | -6.06  | 0.10 |
| 1557055_s_at | <b>LOC643837</b>                                                                                                                  | 643837                                                   | hypothetical protein LOC643837                                                                                                                                                                                                                                                                                                                                                                           | 11.86  | 0.10 |
| 239117_at    | <b>LOC643950</b>                                                                                                                  | 643950                                                   | hypothetical LOC643950<br>v-maf musculoaponeurotic fibrosarcoma oncogene homolog G (avian) /// similar to v-maf musculoaponeurotic fibrosarcoma oncogene                                                                                                                                                                                                                                                 | -17.47 | 0.03 |
| 204970_s_at  | <b>LOC644132</b><br>/// <b>MAFG</b>                                                                                               | 4097<br>644132                                           | /// family, protein G                                                                                                                                                                                                                                                                                                                                                                                    | 6.94   | 0.00 |
| 201874_at    | <b>LOC644387</b><br>/// <b>MPZL1</b>                                                                                              | 644387<br>9019                                           | /// myelin protein zero-like 1 /// similar to myelin protein zero-like 1 isoform a<br>ARP3 actin-related protein 3 homolog B                                                                                                                                                                                                                                                                             | -5.29  | 0.03 |
| 224424_x_at  | <b>LOC644773</b>                                                                                                                  | 644773                                                   | pseudogene<br>THO complex 4 /// similar to THO complex subunit 4 (Tho4) (Ally of AML-1 and LEF-1)                                                                                                                                                                                                                                                                                                        | 2.04   | 0.22 |
| 226319_s_at  | <b>LOC644811</b><br>/// <b>THOC4</b>                                                                                              | 10189<br>644811                                          | /// (Transcriptional coactivator Aly/REF) (bZIP-enhancing factor BEF)                                                                                                                                                                                                                                                                                                                                    | 2.34   | 0.37 |
| 1560007_at   | <b>LOC645984</b><br><b>LOC646208</b><br>///<br><b>LOC654174</b>                                                                   | 645984<br>11049                                          | hypothetical LOC645984<br>///<br>/// YDD19 protein /// hypothetical LOC646208 ///<br>/// similar to CG4775-PA /// similar to lethal (2)                                                                                                                                                                                                                                                                  | 2.24   | 0.13 |
| 215207_x_at  | <b>LOC729148</b><br>/// <b>YDD19</b>                                                                                              | 654174<br>729148                                         | /// k00619 CG4775-PA                                                                                                                                                                                                                                                                                                                                                                                     | 4.68   | 0.22 |
| 230775_s_at  | <b>LOC646871</b>                                                                                                                  | 646871                                                   | hypothetical LOC646871                                                                                                                                                                                                                                                                                                                                                                                   | 5.89   | 0.06 |
| 226789_at    | <b>LOC647121</b>                                                                                                                  | 647121                                                   | similar to embigin homolog                                                                                                                                                                                                                                                                                                                                                                               | -5.72  | 0.00 |
| 214084_x_at  | <b>LOC648998</b><br>///<br><b>LOC652625</b><br>///<br><b>LOC652699</b><br>/// <b>NCF1</b> ///<br><b>NCF1B</b> ///<br><b>NCF1C</b> | 648998<br>652625<br>652699<br>653361<br>654816<br>654817 | similar to Neutrophil cytosol factor 1 (NCF-1) (Neutrophil NADPH oxidase factor 1) (47 kDa neutrophil oxidase factor) (p47-phox) (NCF-47K)<br>/// (47 kDa autosomal chronic granulomatous disease protein) (NOXO2) /// neutrophil cytosolic factor 1, (chronic granulomatous disease, autosomal 1) /// neutrophil cytosolic factor 1B<br>/// pseudogene /// neutrophil cytosolic factor 1C<br>pseudogene | -2.23  | 0.03 |
| 1569871_at   | <b>LOC650392</b><br><b>LOC652526</b><br>///<br><b>LOC727927</b>                                                                   | 650392<br>652526<br>727927                               | protein LOC650392<br>/// phosphodiesterase 4D interacting protein (myomegalin) /// similar to phosphodiesterase 4D                                                                                                                                                                                                                                                                                       | 3.39   | 0.10 |
| 212392_s_at  | <b>LOC652725</b><br>/// <b>PDE4DIP</b><br><b>LOC652725</b><br>/// <b>NAV3</b>                                                     | 9659<br>652725<br>89795                                  | interacting protein isoform 2<br>///<br>neuron navigator 3 /// similar to neuron navigator 3                                                                                                                                                                                                                                                                                                             | 13.64  | 0.00 |
| 1562234_a_at | <b>LOC652993</b><br>/// <b>PHLDA1</b>                                                                                             | 22822<br>652993                                          | /// pleckstrin homology-like domain, family A, member 1 /// hypothetical LOC652993                                                                                                                                                                                                                                                                                                                       | 7.08   | 0.37 |
| 217998_at    | <b>LOC653390</b><br>///<br><b>LOC730092</b><br>/// <b>RRN3</b>                                                                    | 54700<br>653390<br>730092                                | /// homolog (S. cerevisiae) /// RRN3 RNA polymerase I transcription factor homolog (S. cerevisiae) pseudogene                                                                                                                                                                                                                                                                                            | 40.06  | 0.00 |
| 216902_s_at  | <b>LOC653441</b><br>/// <b>PHC1</b>                                                                                               | 1911<br>653441                                           | /// polyhomeotic homolog 1 (Drosophila) /// similar to polyhomeotic 1-like<br>signal peptidase complex subunit 2 homolog (S. cerevisiae) /// signal peptidase complex subunit 2                                                                                                                                                                                                                          | 13.18  | 0.37 |
| 218338_at    | <b>LOC653566</b><br>/// <b>SPCS2</b>                                                                                              | 653566<br>9789                                           | /// homolog pseudogene                                                                                                                                                                                                                                                                                                                                                                                   | 32.79  | 0.00 |
| 201239_s_at  | <b>LOC653879</b>                                                                                                                  | 653879                                                   | similar to Complement C3 precursor                                                                                                                                                                                                                                                                                                                                                                       | 2.76   | 0.22 |
| 217767_at    |                                                                                                                                   |                                                          |                                                                                                                                                                                                                                                                                                                                                                                                          | 77.43  | 0.00 |

|             |                                         |                          |                                                                                                                                                                                                                                                                                                                                                            |        |      |
|-------------|-----------------------------------------|--------------------------|------------------------------------------------------------------------------------------------------------------------------------------------------------------------------------------------------------------------------------------------------------------------------------------------------------------------------------------------------------|--------|------|
|             |                                         |                          | phosphodiesterase 4D interacting protein                                                                                                                                                                                                                                                                                                                   |        |      |
| 212390_at   | <b>LOC727893</b><br>/// <b>PDE4DIP</b>  | 727893 ///<br>9659       | (myomegalin) /// similar to phosphodiesterase 4D<br>interacting protein isoform 1<br>similar to phosphodiesterase 4D interacting                                                                                                                                                                                                                           | 3.34   | 0.00 |
| 214129_at   | <b>LOC727942</b>                        | 727942                   | protein isoform 2                                                                                                                                                                                                                                                                                                                                          | 12.40  | 0.03 |
| 1558794_at  | <b>LOC728190</b><br><b>LOC728320</b>    | 728190<br>4057 ///       | Hypothetical protein LOC728190                                                                                                                                                                                                                                                                                                                             | -2.09  | 0.06 |
| 202018_s_at | /// <b>LTF</b>                          | 728320                   | lactotransferrin /// similar to lactotransferrin                                                                                                                                                                                                                                                                                                           | -2.19  | 0.03 |
| 213605_s_at | <b>LOC728411</b><br><b>LOC728453</b>    | 728411<br>/// 728453 /// | Similar to Beta-glucuronidase precursor                                                                                                                                                                                                                                                                                                                    | -7.95  | 0.37 |
| 216380_x_at | <b>LOC730288</b><br><b>LOC728661</b>    | 730288<br>728661 ///     | similar to 40S ribosomal protein S28<br>solute carrier family 35, member E2 /// similar to                                                                                                                                                                                                                                                                 | 3.13   | 0.13 |
| 217122_s_at | /// <b>SLC35E2</b><br><b>LOC728866</b>  | 9906                     | solute carrier family 35, member E2                                                                                                                                                                                                                                                                                                                        | -7.74  | 0.00 |
| 224899_s_at | /// <b>RP11-</b><br><b>217H1.1</b>      | 728866 ///<br>84061      | implantation-associated protein /// similar to<br>implantation-associated protein                                                                                                                                                                                                                                                                          | 3.20   | 0.03 |
| 227710_s_at | <b>LOC728913</b><br><b>LOC729030</b>    | 728913<br>729030 ///     | Similar to Reticulocalbin-1 precursor /// Pp13759<br>NCK adaptor protein 2 /// similar to NCK adaptor                                                                                                                                                                                                                                                      | 2.74   | 0.03 |
| 203315_at   | /// <b>NCK2</b><br><b>LOC729144</b>     | 8440<br>4217 ///         | protein 2<br>mitogen-activated protein kinase kinase kinase 5                                                                                                                                                                                                                                                                                              | -2.12  | 0.03 |
| 203837_at   | /// <b>MAP3K5</b>                       | 729144                   | /// hypothetical protein LOC729144                                                                                                                                                                                                                                                                                                                         | -2.07  | 0.22 |
| 1556180_at  | <b>LOC729678</b>                        | 729678                   | hypothetical protein LOC729678<br>RRN3 RNA polymerase I transcription factor                                                                                                                                                                                                                                                                               | 2.71   | 0.22 |
| 216908_x_at | <b>LOC730092</b>                        | 730092                   | homolog (S. cerevisiae) pseudogene                                                                                                                                                                                                                                                                                                                         | 31.45  | 0.00 |
| 215756_at   | <b>LOC730227</b>                        | 730227                   | hypothetical protein LOC730227                                                                                                                                                                                                                                                                                                                             | 4.59   | 0.22 |
| 240287_at   | <b>LOC730249</b>                        | 730249                   | similar to Immune-responsive protein 1<br>protein kinase, cAMP-dependent, catalytic, alpha                                                                                                                                                                                                                                                                 | 53.16  | 0.00 |
| 216234_s_at | <b>LOC730418</b><br>/// <b>PRKACA</b>   | 5566 ///<br>730418       | /// similar to protein kinase, cAMP-dependent,<br>catalytic, gamma<br>phosphatase and tensin homolog (mutated in<br>multiple advanced cancers 1) /// phosphatase and<br>tensin homolog (mutated in multiple advanced<br>cancers 1), pseudogene 1 /// similar to<br>Phosphatidylinositol-3,4,5-trisphosphate 3-<br>phosphatase and dual-specificity protein | -3.15  | 0.37 |
| 217492_s_at | <b>LOC731292</b><br>/// <b>PTEN</b> /// | 11191 ///<br>5728 ///    | phosphatase PTEN (Phosphatase and tensin<br>homolog) (Mutated in multiple advanced cancers<br>1)                                                                                                                                                                                                                                                           | -2.81  | 0.00 |
| 1569095_at  | <b>PTENP1</b>                           | 731292                   |                                                                                                                                                                                                                                                                                                                                                            | 6.27   | 0.00 |
| 226842_at   | <b>LOC731424</b>                        | 731424                   | hypothetical protein LOC731424                                                                                                                                                                                                                                                                                                                             | -9.44  | 0.13 |
| 228993_s_at | <b>LOC90110</b>                         | 90110                    | hypothetical protein LOC90110                                                                                                                                                                                                                                                                                                                              | -2.42  | 0.00 |
| 214791_at   | <b>LOC92482</b><br><b>LOC93349</b>      | 92482<br>93349           | hypothetical protein LOC92482<br>hypothetical protein BC004921<br>LON peptidase N-terminal domain and ring finger                                                                                                                                                                                                                                          | 2.51   | 0.58 |
| 226038_at   | <b>LONRF1</b>                           | 91694                    | 1                                                                                                                                                                                                                                                                                                                                                          | 2.96   | 0.13 |
| 202651_at   | <b>LPGAT1</b>                           | 9926                     | lysophosphatidylglycerol acyltransferase 1                                                                                                                                                                                                                                                                                                                 | -3.48  | 0.00 |
| 202459_s_at | <b>LPIN2</b>                            | 9663                     | lipin 2                                                                                                                                                                                                                                                                                                                                                    | -4.41  | 0.00 |
| 219759_at   | <b>LRAP</b>                             | 64167                    | leukocyte-derived arginine aminopeptidase<br>leucine rich repeat and fibronectin type III domain                                                                                                                                                                                                                                                           | 4.98   | 0.10 |
| 232486_at   | <b>LRFN1</b>                            | 57622                    | containing 1                                                                                                                                                                                                                                                                                                                                               | -2.31  | 0.22 |
| 228648_at   | <b>LRG1</b>                             | 116844                   | leucine-rich alpha-2-glycoprotein 1                                                                                                                                                                                                                                                                                                                        | -2.53  | 0.37 |
| 35974_at    | <b>LRMP</b>                             | 4033                     | lymphoid-restricted membrane protein<br>low density lipoprotein-related protein 1 (alpha-2-                                                                                                                                                                                                                                                                | -19.41 | 0.00 |
| 200784_s_at | <b>LRP1</b>                             | 4035                     | macroglobulin receptor)                                                                                                                                                                                                                                                                                                                                    | 2.19   | 0.03 |
| 201412_at   | <b>LRP10</b>                            | 26020                    | low density lipoprotein receptor-related protein 10<br>low density lipoprotein receptor-related protein                                                                                                                                                                                                                                                    | -2.18  | 0.00 |
| 201186_at   | <b>LRPAP1</b>                           | 4043                     | associated protein 1                                                                                                                                                                                                                                                                                                                                       | -3.38  | 0.03 |
| 32062_at    | <b>LRRC14</b>                           | 9684                     | leucine rich repeat containing 14                                                                                                                                                                                                                                                                                                                          | -2.19  | 0.00 |



|              |                  |                                                                                                         |        |      |
|--------------|------------------|---------------------------------------------------------------------------------------------------------|--------|------|
| 203835_at    | <b>LRRC32</b>    | 2615 leucine rich repeat containing 32                                                                  | 2.62   | 0.37 |
| 229231_at    | <b>LRRC37B</b>   | 114659 leucine rich repeat containing 37B                                                               | -2.36  | 0.22 |
| 223552_at    | <b>LRRC4</b>     | 64101 leucine rich repeat containing 4                                                                  | -7.55  | 0.06 |
| 206483_at    | <b>LRRC6</b>     | 23639 leucine rich repeat containing 6                                                                  | -3.05  | 0.22 |
| 229584_at    | <b>LRRK2</b>     | 120892 leucine-rich repeat kinase 2                                                                     | -2.30  | 0.00 |
| 1568667_s_at | <b>LSDP5</b>     | 440503 lipid storage droplet protein 5                                                                  | 3.99   | 0.00 |
| 214181_x_at  | <b>LST1</b>      | 7940 leukocyte specific transcript 1                                                                    | -2.96  | 0.00 |
| 208771_s_at  | <b>LTA4H</b>     | 4048 leukotriene A4 hydrolase                                                                           | -3.39  | 0.22 |
| 207339_s_at  | <b>LTB</b>       | 4050 lymphotoxin beta (TNF superfamily, member 3)                                                       | -2.39  | 0.00 |
| 243852_at    | <b>LUC7L2</b>    | 51631 LUC7-like 2 (S. cerevisiae)                                                                       | 3.08   | 0.22 |
| 202145_at    | <b>LY6E</b>      | 4061 lymphocyte antigen 6 complex, locus E                                                              | 3.46   | 0.00 |
| 205668_at    | <b>LY75</b>      | 4065 lymphocyte antigen 75                                                                              | -5.48  | 0.22 |
| 226996_at    | <b>LYCAT</b>     | 253558 lysocardiolipin acyltransferase                                                                  | -4.74  | 0.10 |
| 226851_at    | <b>LYPLAL1</b>   | 127018 lysophospholipase-like 1                                                                         | -3.54  | 0.22 |
| 239960_x_at  | <b>LYRM7</b>     | 90624 Lym7 homolog (mouse)                                                                              | 2.80   | 0.37 |
| 203518_at    | <b>LYST</b>      | 1130 lysosomal trafficking regulator                                                                    | -2.63  | 0.00 |
| 1555745_a_at | <b>LYZ</b>       | 4069 lysozyme (renal amyloidosis)<br>mannose-6-phosphate receptor (cation<br>dependent)                 | -2.25  | 0.00 |
| 200900_s_at  | <b>M6PR</b>      | 4074 dependent)                                                                                         | 7.85   | 0.00 |
| 210252_s_at  | <b>MADD</b>      | 8567 MAP-kinase activating death domain<br>v-maf musculoaponeurotic fibrosarcoma                        | -3.21  | 0.37 |
| 218559_s_at  | <b>MAFB</b>      | 9935 oncogene homolog B (avian)<br>v-maf musculoaponeurotic fibrosarcoma                                | 15.22  | 0.00 |
| 36711_at     | <b>MAFF</b>      | 23764 oncogene homolog F (avian)                                                                        | 23.00  | 0.00 |
| 224480_s_at  | <b>MAG1</b>      | 84803 lung cancer metastasis-associated protein                                                         | -4.54  | 0.00 |
| 218176_at    | <b>MAGEF1</b>    | 64110 melanoma antigen family F, 1                                                                      | -2.52  | 0.58 |
| 220302_at    | <b>MAK</b>       | 4117 male germ cell-associated kinase                                                                   | -4.16  | 0.00 |
| 235457_at    | <b>MAML2</b>     | 84441 mastermind-like 2 (Drosophila)                                                                    | 23.34  | 0.00 |
| 242794_at    | <b>MAML3</b>     | 55534 mastermind-like 3 (Drosophila)                                                                    | -8.63  | 0.10 |
| 208116_s_at  | <b>MAN1A1</b>    | 4121 mannosidase, alpha, class 1A, member 1                                                             | -5.50  | 0.00 |
| 226538_at    | <b>MAN2A1</b>    | 4124 Mannosidase, alpha, class 2A, member 1                                                             | -5.62  | 0.10 |
| 202032_s_at  | <b>MAN2A2</b>    | 4122 mannosidase, alpha, class 2A, member 2                                                             | -3.39  | 0.00 |
| 214703_s_at  | <b>MAN2B2</b>    | 23324 mannosidase, alpha, class 2B, member 2                                                            | -3.59  | 0.22 |
| 208786_s_at  | <b>MAP1LC3B</b>  | 81631 microtubule-associated protein 1 light chain 3 beta                                               | 2.03   | 0.03 |
| 202670_at    | <b>MAP2K1</b>    | 5604 mitogen-activated protein kinase kinase 1<br>mitogen-activated protein kinase kinase 1             | 2.60   | 0.06 |
| 217971_at    | <b>MAP2K1IP1</b> | 8649 interacting protein 1                                                                              | 2.31   | 0.00 |
| 203266_s_at  | <b>MAP2K4</b>    | 6416 mitogen-activated protein kinase kinase 4                                                          | -19.64 | 0.00 |
| 225927_at    | <b>MAP3K1</b>    | 4214 mitogen-activated protein kinase kinase kinase 1                                                   | -3.22  | 0.00 |
| 226979_at    | <b>MAP3K2</b>    | 10746 mitogen-activated protein kinase kinase kinase 2                                                  | -2.31  | 0.00 |
| 203514_at    | <b>MAP3K3</b>    | 4215 mitogen-activated protein kinase kinase kinase 3                                                   | -12.04 | 0.00 |
| 205027_s_at  | <b>MAP3K8</b>    | 1326 mitogen-activated protein kinase kinase kinase 8<br>mitogen-activated protein kinase kinase kinase | 10.96  | 0.00 |
| 222547_at    | <b>MAP4K4</b>    | 9448 kinase 4                                                                                           | 2.75   | 0.00 |
| 202890_at    | <b>MAP7</b>      | 9053 microtubule-associated protein 7                                                                   | -2.09  | 0.37 |
| 229847_at    | <b>MAPK1</b>     | 5594 Mitogen-activated protein kinase 1                                                                 | -3.98  | 0.00 |
| 210449_x_at  | <b>MAPK14</b>    | 1432 mitogen-activated protein kinase 14                                                                | -6.80  | 0.00 |
| 204708_at    | <b>MAPK4</b>     | 5596 mitogen-activated protein kinase 4                                                                 | -2.01  | 0.00 |
| 207121_s_at  | <b>MAPK6</b>     | 5597 mitogen-activated protein kinase 6                                                                 | 11.63  | 0.00 |
| 210075_at    | <b>MARCH2</b>    | 51257 membrane-associated ring finger (C3HC4) 2                                                         | -3.53  | 0.22 |
| 230112_at    | <b>MARCH4</b>    | 57574 membrane-associated ring finger (C3HC4) 4                                                         | -2.27  | 0.37 |
| 221824_s_at  | <b>MARCH8</b>    | 220972 membrane-associated ring finger (C3HC4) 8                                                        | -2.73  | 0.37 |

|              |                  |                                                                                                   |        |      |
|--------------|------------------|---------------------------------------------------------------------------------------------------|--------|------|
|              |                  | myristoylated alanine-rich protein kinase C                                                       |        |      |
| 225897_at    | <b>MARCKS</b>    | 4082 substrate                                                                                    | 2.16   | 0.00 |
| 202568_s_at  | <b>MARK3</b>     | 4140 MAP/microtubule affinity-regulating kinase 3<br>MYC-associated zinc finger protein (purine-  | 2.19   | 0.03 |
| 212064_x_at  | <b>MAZ</b>       | 4150 binding transcription factor)                                                                | -3.49  | 0.03 |
| 209579_s_at  | <b>MBD4</b>      | 8930 methyl-CpG binding domain protein 4                                                          | -2.88  | 0.00 |
| 233015_at    | <b>MBNL1</b>     | 4154 Muscleblind-like (Drosophila)                                                                | -2.44  | 0.22 |
| 227379_at    | <b>MBOAT1</b>    | 154141 membrane bound O-acyltransferase domain<br>containing 1                                    | -17.40 | 0.00 |
| 226726_at    | <b>MBOAT2</b>    | 129642 membrane bound O-acyltransferase domain<br>containing 2                                    | -19.71 | 0.03 |
| 1559427_at   | <b>MCF2L</b>     | MCF.2 cell line derived transforming sequence-<br>23263 like                                      | 2.48   | 0.10 |
| 202556_s_at  | <b>MCRS1</b>     | 10445 microspherule protein 1                                                                     | 2.23   | 0.58 |
| 220122_at    | <b>MCTP1</b>     | 79772 multiple C2 domains, transmembrane 1                                                        | 2.36   | 0.00 |
| 243109_at    | <b>MCTP2</b>     | 55784 multiple C2 domains, transmembrane 2                                                        | -8.55  | 0.03 |
| 204059_s_at  | <b>ME1</b>       | 4199 malic enzyme 1, NADP(+)-dependent, cytosolic<br>malic enzyme 2, NAD(+)-dependent,            | 2.21   | 0.22 |
| 209397_at    | <b>ME2</b>       | 4200 mitochondrial                                                                                | -3.01  | 0.13 |
| 202618_s_at  | <b>MECP2</b>     | 4204 methyl CpG binding protein 2 (Rett syndrome)                                                 | 2.14   | 0.03 |
| 212207_at    | <b>MED13L</b>    | 23389 mediator complex subunit 13-like                                                            | -2.10  | 0.03 |
| 218846_at    | <b>MED23</b>     | 9439 mediator complex subunit 23                                                                  | -2.25  | 0.58 |
| 1553993_s_at | <b>MED25</b>     | 81857 mediator complex subunit 25                                                                 | -9.15  | 0.06 |
| 218438_s_at  | <b>MED28</b>     | 80306 mediator complex subunit 28                                                                 | 2.90   | 0.10 |
| 1553978_at   | <b>MEF2B</b>     | 4207 myocyte enhancer factor 2B                                                                   | -2.88  | 0.13 |
| 212830_at    | <b>MEGF9</b>     | 1955 multiple EGF-like-domains 9                                                                  | -2.25  | 0.00 |
| 206028_s_at  | <b>MERTK</b>     | 10461 c-mer proto-oncogene tyrosine kinase<br>met proto-oncogene (hepatocyte growth factor        | 2.05   | 0.03 |
| 211599_x_at  | <b>MET</b>       | 4233 receptor)                                                                                    | 2.59   | 0.13 |
| 207761_s_at  | <b>METTL7A</b>   | 25840 methyltransferase like 7A                                                                   | -5.08  | 0.06 |
| 203406_at    | <b>MFAP1</b>     | 4236 microfibrillar-associated protein 1<br>MFNG O-fucosylpeptide 3-beta-N-                       | 2.74   | 0.00 |
| 204153_s_at  | <b>MFNG</b>      | 4242 acetylglucosaminyltransferase                                                                | -8.53  | 0.13 |
| 243407_at    | <b>MFSD8</b>     | 256471 Major facilitator superfamily domain containing 8                                          | 2.83   | 0.22 |
| 230848_s_at  | <b>MGA</b>       | 23269 MAX gene associated                                                                         | 6.76   | 0.13 |
| 206522_at    | <b>MGAM</b>      | 8972 maltase-glucoamylase (alpha-glucosidase)<br>mannosyl (alpha-1,3-)-glycoprotein beta-1,2-N-   | -5.34  | 0.00 |
| 201126_s_at  | <b>MGAT1</b>     | 4245 acetylglucosaminyltransferase<br>mannosyl (alpha-1,6-)-glycoprotein beta-1,2-N-              | 2.43   | 0.03 |
| 211061_s_at  | <b>MGAT2</b>     | 4247 acetylglucosaminyltransferase                                                                | 2.48   | 0.58 |
| 224507_s_at  | <b>MGC12916</b>  | 84815 hypothetical protein MGC12916                                                               | 8.29   | 0.03 |
| 1553747_at   | <b>MGC16025</b>  | 85009 hypothetical protein MGC16025                                                               | 2.37   | 0.06 |
| 236248_x_at  | <b>MGC21874</b>  | 93624 transcriptional adaptor 2 (ADA2 homolog, yeast)-<br>beta                                    | -3.50  | 0.10 |
|              | <b>MGC31957</b>  | tumor necrosis factor receptor superfamily,<br>///                                                |        |      |
| 210484_s_at  | <b>TNFRSF10C</b> | 254896 /// member 10c, decoy without an intracellular<br>domain /// hypothetical protein MGC31957 | -18.15 | 0.00 |
| 220305_at    | <b>MGC3260</b>   | 78993 hypothetical protein MGC3260                                                                | -5.45  | 0.10 |
| 226657_at    | <b>MGC33894</b>  | 256302 transcript expressed during hematopoiesis 2                                                | -12.08 | 0.00 |
| 239186_at    | <b>MGC39372</b>  | 221756 hypothetical protein MGC39372                                                              | 43.88  | 0.00 |
| 227983_at    | <b>MGC7036</b>   | 196383 hypothetical protein MGC7036                                                               | 2.45   | 0.00 |
| 200899_s_at  | <b>MGEA5</b>     | 10724 meningioma expressed antigen 5 (hyaluronidase)                                              | -2.29  | 0.00 |
| 211026_s_at  | <b>MGLL</b>      | 11343 monoglyceride lipase<br>Microtubule associated monooxygenase, calponin                      | 24.05  | 0.06 |
| 236475_at    | <b>MICAL2</b>    | 9645 and LIM domain containing 2                                                                  | -19.76 | 0.00 |

|              |                 |                                                                                                                                                      |        |      |
|--------------|-----------------|------------------------------------------------------------------------------------------------------------------------------------------------------|--------|------|
| 1555862_s_at | <b>MICALL2</b>  | 79778 MICAL-like 2                                                                                                                                   | -2.52  | 0.58 |
| 206247_at    | <b>MICB</b>     | 4277 MHC class I polypeptide-related sequence B                                                                                                      | 2.35   | 0.06 |
| 226214_at    | <b>MIR16</b>    | 51573 membrane interacting protein of RGS16<br>MIT, microtubule interacting and transport, domain                                                    | -5.56  | 0.10 |
| 226329_s_at  | <b>MITD1</b>    | 129531 containing 1                                                                                                                                  | 3.58   | 0.00 |
| 222530_s_at  | <b>MKKS</b>     | 8195 McKusick-Kaufman syndrome                                                                                                                       | 3.54   | 0.06 |
| 215292_s_at  | <b>MKL1</b>     | 57591 megakaryoblastic leukemia (translocation) 1<br>muskelin 1, intracellular mediator containing kelch                                             | -4.34  | 0.00 |
| 204423_at    | <b>MKLN1</b>    | 4289 motifs                                                                                                                                          | -3.27  | 0.58 |
| 222510_s_at  | <b>MKRN2</b>    | 23609 makorin, ring finger protein, 2<br>mutL homolog 1, colon cancer, nonpolyposis type                                                             | -3.86  | 0.58 |
| 202520_s_at  | <b>MLH1</b>     | 4292 2 (E. coli)                                                                                                                                     | 5.51   | 0.13 |
| 227528_s_at  | <b>MLL2</b>     | 8085 myeloid/lymphoid or mixed-lineage leukemia 2<br>Myeloid/lymphoid or mixed-lineage leukemia<br>(trithorax homolog, Drosophila); translocated to, | -2.08  | 0.22 |
| 216480_x_at  | <b>MLLT10</b>   | 8028 10<br><br>myeloid/lymphoid or mixed-lineage leukemia                                                                                            | -2.22  | 0.00 |
| 224784_at    | <b>MLLT6</b>    | 4302 (trithorax homolog, Drosophila); translocated to, 6                                                                                             | 9.79   | 0.03 |
| 239108_at    | <b>MLSTD1</b>   | 55711 Male sterility domain containing 1                                                                                                             | -3.42  | 0.22 |
| 224866_at    | <b>MLSTD2</b>   | 84188 male sterility domain containing 2                                                                                                             | -2.99  | 0.03 |
| 202519_at    | <b>MLXIP</b>    | 22877 MLX interacting protein<br>methylmalonic aciduria (cobalamin deficiency)                                                                       | -3.02  | 0.37 |
| 239852_at    | <b>MMAA</b>     | 166785 cblA type                                                                                                                                     | 4.39   | 0.00 |
| 203434_s_at  | <b>MME</b>      | 4311 membrane metallo-endopeptidase                                                                                                                  | -38.72 | 0.00 |
| 202828_s_at  | <b>MMP14</b>    | 4323 matrix metallopeptidase 14 (membrane-inserted)                                                                                                  | 74.59  | 0.00 |
| 207289_at    | <b>MMP25</b>    | 64386 matrix metallopeptidase 25<br>matrix metallopeptidase 9 (gelatinase B, 92kDa)                                                                  | -6.04  | 0.00 |
| 203936_s_at  | <b>MMP9</b>     | 4318 gelatinase, 92kDa type IV collagenase)                                                                                                          | -3.04  | 0.10 |
| 204959_at    | <b>MNDA</b>     | 4332 myeloid cell nuclear differentiation antigen<br>MOB1, Mps One Binder kinase activator-like 2A                                                   | -7.66  | 0.00 |
| 225530_at    | <b>MOBKL2A</b>  | 126308 (yeast)<br>MOB1, Mps One Binder kinase activator-like 2C                                                                                      | -2.10  | 0.00 |
| 227066_at    | <b>MOBKL2C</b>  | 148932 (yeast)                                                                                                                                       | 6.97   | 0.22 |
| 201994_at    | <b>MORF4L2</b>  | 9643 mortality factor 4 like 2<br>MOCO sulphurase C-terminal domain containing                                                                       | 2.91   | 0.00 |
| 218865_at    | <b>MOSC1</b>    | 64757 1                                                                                                                                              | -11.82 | 0.00 |
| 64883_at     | <b>MOSPD2</b>   | 158747 motile sperm domain containing 2                                                                                                              | -2.24  | 0.37 |
| 226841_at    | <b>MPEG1</b>    | 219972 macrophage expressed gene 1                                                                                                                   | -3.23  | 0.00 |
| 203949_at    | <b>MPO</b>      | 4353 myeloperoxidase<br>membrane protein, palmitoylated 7 (MAGUK p55)                                                                                | -4.04  | 0.00 |
| 1564308_a_at | <b>MPP7</b>     | 143098 subfamily member 7)                                                                                                                           | -5.72  | 0.00 |
| 206764_x_at  | <b>MPPE1</b>    | 65258 metallophosphoesterase 1                                                                                                                       | -12.94 | 0.00 |
| 210594_x_at  | <b>MPZL1</b>    | 9019 myelin protein zero-like 1                                                                                                                      | -4.52  | 0.13 |
| 203780_at    | <b>MPZL2</b>    | 10205 myelin protein zero-like 2                                                                                                                     | -3.75  | 0.37 |
| 227747_at    | <b>MPZL3</b>    | 196264 myelin protein zero-like 3                                                                                                                    | -3.65  | 0.00 |
| 210224_at    | <b>MR1</b>      | 3140 major histocompatibility complex, class I-related                                                                                               | 7.32   | 0.00 |
| 219648_at    | <b>MREG</b>     | 55686 melanoregulin                                                                                                                                  | 20.89  | 0.03 |
| 212199_at    | <b>MRFAP1L1</b> | 114932 Morf4 family associated protein 1-like 1                                                                                                      | -3.62  | 0.13 |
| 1553293_at   | <b>MRGPRX3</b>  | 117195 MAS-related GPR, member X3                                                                                                                    | 2.65   | 0.06 |
| 225201_s_at  | <b>MRPL14</b>   | 64928 mitochondrial ribosomal protein L14                                                                                                            | 7.35   | 0.00 |
| 218270_at    | <b>MRPL24</b>   | 79590 mitochondrial ribosomal protein L24                                                                                                            | 5.93   | 0.22 |
| 225581_s_at  | <b>MRPL50</b>   | 54534 mitochondrial ribosomal protein L50                                                                                                            | 11.33  | 0.22 |
| 226241_s_at  | <b>MRPL52</b>   | 122704 mitochondrial ribosomal protein L52                                                                                                           | 11.49  | 0.00 |
| 226047_at    | <b>MRVI1</b>    | 10335 murine retrovirus integration site 1 homolog                                                                                                   | -7.94  | 0.03 |

|              |                 |                                                                                                              |        |      |
|--------------|-----------------|--------------------------------------------------------------------------------------------------------------|--------|------|
| 219607_s_at  | <b>MS4A4A</b>   | 51338 membrane-spanning 4-domains, subfamily A, member 4                                                     | 20.54  | 0.37 |
| 219666_at    | <b>MS4A6A</b>   | 64231 membrane-spanning 4-domains, subfamily A, member 6A                                                    | -19.01 | 0.00 |
| 202911_at    | <b>MSH6</b>     | 2956 mutS homolog 6 (E. coli)                                                                                | -3.66  | 0.03 |
| 226720_at    | <b>MST101</b>   | 114825 MSTP101                                                                                               | -3.79  | 0.13 |
|              | <b>MT1A</b> /// | 4489 ///                                                                                                     |        |      |
|              | <b>MT1M</b> /// | 4499 ///<br>metallothionein 1A ///<br>metallothionein 1M ///                                                 |        |      |
| 216336_x_at  | <b>MT1P2</b>    | 645745 metallothionein 1 pseudogene 2                                                                        | 6.54   | 0.00 |
| 212859_x_at  | <b>MT1E</b>     | 4493 metallothionein 1E                                                                                      | 18.67  | 0.10 |
| 213629_x_at  | <b>MT1F</b>     | 4494 metallothionein 1F                                                                                      | 36.13  | 0.06 |
| 204745_x_at  | <b>MT1G</b>     | 4495 metallothionein 1G                                                                                      | 22.28  | 0.10 |
|              | <b>MT1H</b> /// | 4496 ///<br>metallothionein 1H ///<br>metallothionein 1                                                      |        |      |
| 206461_x_at  | <b>MT1P2</b>    | 645745 pseudogene 2                                                                                          | 24.90  | 0.03 |
| 211456_x_at  | <b>MT1P2</b>    | 645745 metallothionein 1 pseudogene 2                                                                        | 11.68  | 0.00 |
| 204326_x_at  | <b>MT1X</b>     | 4501 metallothionein 1X                                                                                      | 19.86  | 0.00 |
| 212185_x_at  | <b>MT2A</b>     | 4502 metallothionein 2A                                                                                      | 19.85  | 0.00 |
| 217395_at    | <b>MT4</b>      | 84560 metallothionein 4                                                                                      | 2.80   | 0.37 |
| 205322_s_at  | <b>MTF1</b>     | 4520 metal-regulatory transcription factor 1<br>metal response element binding transcription                 | 5.89   | 0.00 |
| 209705_at    | <b>MTF2</b>     | 22823 factor 2<br>methylenetetrahydrofolate dehydrogenase<br>(NADP+ dependent) 2, methenyltetrahydrofolate   | -2.82  | 0.58 |
| 201761_at    | <b>MTHFD2</b>   | 10797 cyclohydrolase                                                                                         | 7.98   | 0.03 |
| 223356_s_at  | <b>MTIF3</b>    | 219402 mitochondrial translational initiation factor 3                                                       | -3.68  | 0.06 |
| 36920_at     | <b>MTM1</b>     | 4534 myotubularin 1                                                                                          | -4.82  | 0.06 |
| 225810_at    | <b>MTMR10</b>   | 54893 myotubularin related protein 10                                                                        | -3.44  | 0.00 |
| 225232_at    | <b>MTMR12</b>   | 54545 myotubularin related protein 12                                                                        | -10.48 | 0.22 |
| 231941_s_at  | <b>MUC20</b>    | 200958 mucin 20, cell surface associated                                                                     | 2.13   | 0.22 |
| 223348_x_at  | <b>MUM1</b>     | 84939 melanoma associated antigen (mutated) 1<br>myxovirus (influenza virus) resistance 1, interferon-       | 2.80   | 0.13 |
| 202086_at    | <b>MX1</b>      | 4599 inducible protein p78 (mouse)                                                                           | 3.64   | 0.00 |
| 202364_at    | <b>MXI1</b>     | 4601 MAX interactor 1                                                                                        | -5.33  | 0.37 |
| 225673_at    | <b>MYADM</b>    | 91663 myeloid-associated differentiation marker<br>v-myb myeloblastosis viral oncogene homolog               | -5.33  | 0.00 |
| 204798_at    | <b>MYB</b>      | 4602 (avian)                                                                                                 | -6.07  | 0.58 |
| 206304_at    | <b>MYBPH</b>    | 4608 myosin binding protein H                                                                                | 2.47   | 0.03 |
| 203359_s_at  | <b>MYCBP</b>    | 26292 c-myc binding protein                                                                                  | -3.24  | 0.10 |
| 228133_s_at  | <b>MYH11</b>    | 4629 myosin, heavy chain 11, smooth muscle                                                                   | -2.12  | 0.00 |
| 227761_at    | <b>MYO5A</b>    | 4644 myosin VA (heavy chain 12, myoxin)                                                                      | -11.12 | 0.03 |
| 225299_at    | <b>MYO5B</b>    | 4645 myosin VB                                                                                               | 2.21   | 0.03 |
| 204601_at    | <b>N4BP1</b>    | 9683 Nedd4 binding protein 1                                                                                 | 2.79   | 0.03 |
| 1557998_at   | <b>NAALADL2</b> | 254827 N-acetylated alpha-linked acidic dipeptidase-like 2<br>NGFI-A binding protein 1 (EGR1 binding protein | 2.05   | 0.37 |
| 209272_at    | <b>NAB1</b>     | 4664 1)                                                                                                      | 2.87   | 0.00 |
|              | <b>NAIP</b> /// | 4671 ///<br>NLR family, apoptosis inhibitory protein ///                                                     |        |      |
| 204860_s_at  | <b>NAIP1B</b>   | 728519 neuronal apoptosis inhibitory protein (centromeric)                                                   | -7.28  | 0.00 |
| 228063_s_at  | <b>NAP1L5</b>   | 266812 nucleosome assembly protein 1-like 5<br>N-ethylmaleimide-sensitive factor attachment                  | -6.91  | 0.13 |
| 206491_s_at  | <b>NAPA</b>     | 8775 protein, alpha                                                                                          | 2.45   | 0.10 |
| 219862_s_at  | <b>NARF</b>     | 26502 nuclear prelamin A recognition factor<br>nuclear autoantigenic sperm protein (histone-                 | -5.61  | 0.00 |
| 201970_s_at  | <b>NASP</b>     | 4678 binding)                                                                                                | -2.18  | 0.13 |
| 1556606_at   | <b>NAV2</b>     | 89797 neuron navigator 2                                                                                     | 2.01   | 0.37 |
| 1552658_a_at | <b>NAV3</b>     | 89795 neuron navigator 3                                                                                     | 7.68   | 0.03 |
| 217299_s_at  | <b>NBN</b>      | 4683 nibrin                                                                                                  | 11.74  | 0.00 |

|             |                  |                                         |                                                                                          |             |
|-------------|------------------|-----------------------------------------|------------------------------------------------------------------------------------------|-------------|
|             |                  | neutrophil cytosolic factor 1, (chronic |                                                                                          |             |
|             | <b>NCF1</b> ///  | 653361 ///                              | granulomatous disease, autosomal 1) ///                                                  |             |
|             | <b>NCF1B</b> /// | 654816 ///                              | neutrophil cytosolic factor 1B pseudogene ///                                            |             |
| 204961_s_at | <b>NCF1C</b>     | 654817                                  | neutrophil cytosolic factor 1C pseudogene                                                | -2.52 0.10  |
| 200610_s_at | <b>NCL</b>       | 4691                                    | nucleolin                                                                                | 2.36 0.00   |
| 215857_at   | <b>NCLN</b>      | 56926                                   | nicalin homolog (zebrafish)                                                              | -25.20 0.00 |
| 209106_at   | <b>NCOA1</b>     | 8648                                    | nuclear receptor coactivator 1                                                           | -5.42 0.03  |
| 205731_s_at | <b>NCOA2</b>     | 10499                                   | nuclear receptor coactivator 2                                                           | -4.54 0.06  |
| 207700_s_at | <b>NCOA3</b>     | 8202                                    | nuclear receptor coactivator 3                                                           | -2.13 0.22  |
| 208979_at   | <b>NCOA6</b>     | 23054                                   | nuclear receptor coactivator 6                                                           | -4.00 0.37  |
| 204162_at   | <b>NDC80</b>     | 10403                                   | NDC80 homolog, kinetochore complex component<br>(S. cerevisiae)                          | -2.37 0.58  |
| 218414_s_at | <b>NDE1</b>      | 54820                                   | nudE nuclear distribution gene E homolog 1 (A.<br>nidulans)                              | -2.16 0.58  |
| 208093_s_at | <b>NDEL1</b>     | 81565                                   | nudE nuclear distribution gene E homolog (A.<br>nidulans)-like 1                         | -2.52 0.03  |
| 217286_s_at | <b>NDRG3</b>     | 57446                                   | NDRG family member 3                                                                     | -8.13 0.58  |
| 209224_s_at | <b>NDUFA2</b>    | 4695                                    | NADH dehydrogenase (ubiquinone) 1 alpha<br>subcomplex, 2, 8kDa                           | -2.38 0.13  |
| 228301_x_at | <b>NDUFB10</b>   | 4716                                    | NADH dehydrogenase (ubiquinone) 1 beta<br>subcomplex, 10, 22kDa                          | -2.43 0.37  |
| 203613_s_at | <b>NDUFB6</b>    | 4712                                    | NADH dehydrogenase (ubiquinone) 1 beta<br>subcomplex, 6, 17kDa                           | -3.75 0.00  |
| 202941_at   | <b>NDUFV2</b>    | 4729                                    | NADH dehydrogenase (ubiquinone) flavoprotein<br>2, 24kDa                                 | 3.27 0.00   |
| 209300_s_at | <b>NECAP1</b>    | 25977                                   | NECAP endocytosis associated 1                                                           | 5.91 0.00   |
| 220731_s_at | <b>NECAP2</b>    | 55707                                   | NECAP endocytosis associated 2                                                           | 2.47 0.06   |
| 201840_at   | <b>NEDD8</b>     | 4738                                    | neural precursor cell expressed, developmentally<br>down-regulated 8                     | -2.34 0.37  |
| 1564093_at  | <b>NEK1</b>      | 4750                                    | NIMA (never in mitosis gene a)-related kinase 1                                          | 2.07 0.58   |
| 212530_at   | <b>NEK7</b>      | 140609                                  | NIMA (never in mitosis gene a)-related kinase 7                                          | -3.18 0.00  |
| 218406_x_at | <b>NENF</b>      | 29937                                   | neuron derived neurotrophic factor                                                       | 2.43 0.58   |
| 208926_at   | <b>NEU1</b>      | 4758                                    | sialidase 1 (lysosomal sialidase)                                                        | 4.49 0.00   |
| 224984_at   | <b>NFAT5</b>     | 10725                                   | nuclear factor of activated T-cells 5, tonicity-<br>responsive                           | 2.51 0.22   |
| 209930_s_at | <b>NFE2</b>      | 4778                                    | nuclear factor (erythroid-derived 2), 45kDa                                              | -10.90 0.00 |
| 201146_at   | <b>NFE2L2</b>    | 4780                                    | nuclear factor (erythroid-derived 2)-like 2                                              | 3.47 0.03   |
| 206929_s_at | <b>NFIC</b>      | 4782                                    | nuclear factor I/C (CCAAT-binding transcription<br>factor)                               | -2.74 0.13  |
| 209239_at   | <b>NFKB1</b>     | 4790                                    | nuclear factor of kappa light polypeptide gene<br>enhancer in B-cells 1 (p105)           | 8.49 0.03   |
| 209636_at   | <b>NFKB2</b>     | 4791                                    | nuclear factor of kappa light polypeptide gene<br>enhancer in B-cells 2 (p49/p100)       | 8.63 0.00   |
| 201502_s_at | <b>NFKBIA</b>    | 4792                                    | nuclear factor of kappa light polypeptide gene<br>enhancer in B-cells inhibitor, alpha   | 3.05 0.00   |
| 203927_at   | <b>NFKBIE</b>    | 4794                                    | nuclear factor of kappa light polypeptide gene<br>enhancer in B-cells inhibitor, epsilon | 11.43 0.00  |
| 223217_s_at | <b>NFKBIZ</b>    | 64332                                   | nuclear factor of kappa light polypeptide gene<br>enhancer in B-cells inhibitor, zeta    | 2.79 0.00   |
| 218128_at   | <b>NFYB</b>      | 4801                                    | nuclear transcription factor Y, beta                                                     | -5.13 0.22  |
| 242800_at   | <b>NHS</b>       | 4810                                    | Nance-Horan syndrome (congenital cataracts and<br>dental anomalies)                      | -11.44 0.37 |
| 202007_at   | <b>NID1</b>      | 4811                                    | nidogen 1                                                                                | 2.13 0.10   |
| 225921_at   | <b>NIN</b>       | 51199                                   | ninein (GSK3B interacting protein)                                                       | -4.30 0.00  |
| 201708_s_at | <b>NIPSNAP1</b>  | 8508                                    | nipsnap homolog 1 (C. elegans)                                                           | -11.64 0.13 |
| 213915_at   | <b>NKG7</b>      | 4818                                    | natural killer cell group 7 sequence                                                     | 3.36 0.37   |
| 225930_at   | <b>NKIRAS1</b>   | 28512                                   | NFKB inhibitor interacting Ras-like 1                                                    | 10.94 0.13  |

|              |                           |                                                                                                                                   |        |      |
|--------------|---------------------------|-----------------------------------------------------------------------------------------------------------------------------------|--------|------|
| 229306_at    | <b>NLF2</b>               | 388125 Nuclear localized factor 2                                                                                                 | 24.46  | 0.37 |
| 225944_at    | <b>NLN</b>                | 57486 neurolysin (metallopeptidase M3 family)                                                                                     | 22.83  | 0.13 |
| 226474_at    | <b>NLRC5</b>              | 84166 NLR family, CARD domain containing 5                                                                                        | 2.26   | 0.00 |
| 210113_s_at  | <b>NLRP1</b>              | 22861 NLR family, pyrin domain containing 1                                                                                       | -16.76 | 0.00 |
| 1552531_a_at | <b>NLRP11</b>             | 204801 NLR family, pyrin domain containing 11                                                                                     | 2.48   | 0.10 |
| 1554952_s_at | <b>NLRP12</b>             | 91662 NLR family, pyrin domain containing 12                                                                                      | -13.11 | 0.03 |
| 231870_s_at  | <b>NMD3</b>               | 51068 NMD3 homolog (S. cerevisiae)<br>non-metastatic cells 7, protein expressed in                                                | 3.20   | 0.58 |
| 219553_at    | <b>NME7</b>               | 29922 (nucleoside-diphosphate kinase)                                                                                             | 4.63   | 0.22 |
| 210097_s_at  | <b>NOL7</b>               | 51406 nucleolar protein 7, 27kDa                                                                                                  | 2.34   | 0.03 |
| 223096_at    | <b>NOP5/NOP5<br/>8</b>    | 51602 nucleolar protein NOP5/NOP58<br>Notch homolog 1, translocation-associated                                                   | 3.59   | 0.06 |
| 218902_at    | <b>NOTCH1</b>             | 4851 (Drosophila)                                                                                                                 | -4.98  | 0.00 |
| 204501_at    | <b>NOV</b>                | 4856 nephroblastoma overexpressed gene                                                                                            | -3.69  | 0.13 |
| 202679_at    | <b>NPC1</b>               | 4864 Niemann-Pick disease, type C1                                                                                                | 3.08   | 0.37 |
| 235033_at    | <b>NPEPL1</b>             | 79716 Aminopeptidase-like 1                                                                                                       | -5.76  | 0.06 |
| 201455_s_at  | <b>NPEPPS</b>             | 9520 aminopeptidase puromycin sensitive                                                                                           | -5.67  | 0.03 |
| 213471_at    | <b>NPHP4</b>              | 261734 nephronophthysis 4<br>thyroid hormone receptor, alpha (erythroblastic<br>leukemia viral (v-erb-a) oncogene homolog, avian) | 3.57   | 0.10 |
| 204760_s_at  | <b>NR1D1 ///<br/>THRA</b> | 7067 ///<br>9572 1 /// nuclear receptor subfamily 1, group D, member                                                              | 14.13  | 0.22 |
| 203920_at    | <b>NR1H3</b>              | 10062 nuclear receptor subfamily 1, group H, member 3                                                                             | 7.25   | 0.22 |
| 225477_s_at  | <b>NR2C2</b>              | 7182 nuclear receptor subfamily 2, group C, member 2                                                                              | -2.48  | 0.37 |
| 209959_at    | <b>NR4A3</b>              | 8013 nuclear receptor subfamily 4, group A, member 3<br>neuroblastoma RAS viral (v-ras) oncogene                                  | 10.06  | 0.06 |
| 224985_at    | <b>NRAS</b>               | 4893 homolog                                                                                                                      | 2.09   | 0.37 |
| 223650_s_at  | <b>NRBF2</b>              | 29982 nuclear receptor binding factor 2                                                                                           | -2.14  | 0.10 |
| 202599_s_at  | <b>NRIP1</b>              | 8204 nuclear receptor interacting protein 1                                                                                       | 4.00   | 0.13 |
| 219557_s_at  | <b>NRIP3</b>              | 56675 nuclear receptor interacting protein 3                                                                                      | 9.64   | 0.22 |
| 217831_s_at  | <b>NSFL1C</b>             | 55968 NSFL1 (p97) cofactor (p47)<br>NSL1, MIND kinetochore complex component,                                                     | -4.46  | 0.00 |
| 209484_s_at  | <b>NSL1</b>               | 25936 homolog (S. cerevisiae)<br>neutral sphingomyelinase (N-SMase) activation                                                    | -3.28  | 0.58 |
| 203269_at    | <b>NSMAF</b>              | 8439 associated factor<br>non-SMC element 2, MMS21 homolog (S.                                                                    | 2.92   | 0.00 |
| 226536_at    | <b>NSMCE2</b>             | 286053 cerevisiae)                                                                                                                | 4.81   | 0.00 |
| 223178_s_at  | <b>NT5DC1</b>             | 221294 5'-nucleotidase domain containing 1                                                                                        | -3.03  | 0.22 |
| 233072_at    | <b>NTNG2</b>              | 84628 netrin G2<br>nudix (nucleoside diphosphate linked moiety X)-                                                                | -6.70  | 0.00 |
| 235002_at    | <b>NUDT16</b>             | 131870 type motif 16<br>nudix (nucleoside diphosphate linked moiety X)-                                                           | -5.63  | 0.03 |
| 224477_s_at  | <b>NUDT16L1</b>           | 84309 type motif 16-like 1<br>nudix (nucleoside diphosphate linked moiety X)-                                                     | -4.65  | 0.37 |
| 212181_s_at  | <b>NUDT4</b>              | 11163 type motif 4<br>nudix (nucleoside diphosphate linked moiety X)-                                                             | -3.22  | 0.06 |
| 223100_s_at  | <b>NUDT5</b>              | 11164 type motif 5                                                                                                                | -8.22  | 0.03 |
| 202155_s_at  | <b>NUP214</b>             | 8021 nucleoporin 214kDa                                                                                                           | -8.13  | 0.00 |
| 213682_at    | <b>NUP50</b>              | 10762 nucleoporin 50kDa                                                                                                           | -2.48  | 0.13 |
| 207740_s_at  | <b>NUP62</b>              | 23636 nucleoporin 62kDa                                                                                                           | 3.15   | 0.03 |
| 204435_at    | <b>NUPL1</b>              | 9818 nucleoporin like 1<br>nuclear undecaprenyl pyrophosphate synthase 1                                                          | 3.05   | 0.22 |
| 225071_at    | <b>NUS1</b>               | 116150 homolog (S. cerevisiae)                                                                                                    | 3.89   | 0.22 |
| 218708_at    | <b>NXT1</b>               | 29107 NTF2-like export factor 1                                                                                                   | 4.34   | 0.58 |
| 205552_s_at  | <b>OAS1</b>               | 4938 2',5'-oligoadenylate synthetase 1, 40/46kDa                                                                                  | 9.31   | 0.00 |

|             |                 |                                                                                                                                                |        |      |
|-------------|-----------------|------------------------------------------------------------------------------------------------------------------------------------------------|--------|------|
| 204972_at   | <b>OAS2</b>     | 4939 2'-5'-oligoadenylate synthetase 2, 69/71kDa                                                                                               | 7.09   | 0.00 |
| 218400_at   | <b>OAS3</b>     | 4940 2'-5'-oligoadenylate synthetase 3, 100kDa                                                                                                 | 6.76   | 0.10 |
| 205660_at   | <b>OASL</b>     | 8638 2'-5'-oligoadenylate synthetase-like                                                                                                      | 2.03   | 0.03 |
| 215952_s_at | <b>OAZ1</b>     | 4946 ornithine decarboxylase antizyme 1                                                                                                        | -3.44  | 0.06 |
| 201365_at   | <b>OAZ2</b>     | 4947 ornithine decarboxylase antizyme 2                                                                                                        | -2.37  | 0.00 |
| 219582_at   | <b>OGFRL1</b>   | 79627 opioid growth factor receptor-like 1<br>O-linked N-acetylglucosamine (GlcNAc)<br>transferase (UDP-N-<br>acetylglucosamine:polypeptide-N- | -2.01  | 0.03 |
| 229787_s_at | <b>OGT</b>      | 8473 acetylglucosaminyl transferase)                                                                                                           | -6.81  | 0.03 |
| 224525_s_at | <b>OLA1</b>     | 29789 Obg-like ATPase 1                                                                                                                        | 2.13   | 0.22 |
| 212768_s_at | <b>OLFM4</b>    | 10562 olfactomedin 4<br>oxidized low density lipoprotein (lectin-like)                                                                         | 2.46   | 0.22 |
| 210004_at   | <b>OLR1</b>     | 4973 receptor 1<br>ORAI calcium release-activated calcium                                                                                      | 11.80  | 0.58 |
| 218812_s_at | <b>ORAI2</b>    | 80228 modulator 2                                                                                                                              | -4.00  | 0.22 |
| 205040_at   | <b>ORM1</b>     | 5004 orosomuroid 1                                                                                                                             | 12.44  | 0.03 |
|             | <b>ORM1 ///</b> | 5004 ///                                                                                                                                       |        |      |
| 205041_s_at | <b>ORM2</b>     | 5005 orosomuroid 1 /// orosomuroid 2                                                                                                           | 10.67  | 0.00 |
| 201800_s_at | <b>OSBP</b>     | 5007 oxysterol binding protein                                                                                                                 | 2.94   | 0.06 |
| 222586_s_at | <b>OSBPL11</b>  | 114885 oxysterol binding protein-like 11                                                                                                       | -3.77  | 0.00 |
| 209485_s_at | <b>OSBPL1A</b>  | 114876 oxysterol binding protein-like 1A                                                                                                       | -5.96  | 0.22 |
| 218047_at   | <b>OSBPL9</b>   | 114883 oxysterol binding protein-like 9                                                                                                        | -4.64  | 0.58 |
| 230170_at   | <b>OSM</b>      | 5008 oncostatin M                                                                                                                              | 8.79   | 0.00 |
| 204479_at   | <b>OSTF1</b>    | 26578 osteoclast stimulating factor 1<br>osteopetrosis associated transmembrane protein                                                        | -2.27  | 0.03 |
| 218196_at   | <b>OSTM1</b>    | 28962 1                                                                                                                                        | 3.44   | 0.00 |
| 224745_x_at | <b>OTUD5</b>    | 55593 OTU domain containing 5                                                                                                                  | 3.20   | 0.03 |
| 223879_s_at | <b>OXR1</b>     | 55074 oxidation resistance 1<br>purinergic receptor P2X, ligand-gated ion channel,                                                             | -3.23  | 0.13 |
| 204088_at   | <b>P2RX4</b>    | 5025 4<br>purinergic receptor P2X, ligand-gated ion channel,                                                                                   | 25.06  | 0.00 |
| 207091_at   | <b>P2RX7</b>    | 5027 7                                                                                                                                         | 7.37   | 0.00 |
| 214615_at   | <b>P2RY10</b>   | 27334 purinergic receptor P2Y, G-protein coupled, 10                                                                                           | -2.83  | 0.22 |
| 220005_at   | <b>P2RY13</b>   | 53829 purinergic receptor P2Y, G-protein coupled, 13                                                                                           | -12.96 | 0.00 |
| 206277_at   | <b>P2RY2</b>    | 5029 purinergic receptor P2Y, G-protein coupled, 2                                                                                             | 7.04   | 0.00 |
| 207543_s_at | <b>P4HA1</b>    | 5033 procollagen-proline, 2-oxoglutarate 4-dioxygenase<br>(proline 4-hydroxylase), alpha polypeptide I                                         | 5.36   | 0.03 |
| 200654_at   | <b>P4HB</b>     | 5034 procollagen-proline, 2-oxoglutarate 4-dioxygenase<br>(proline 4-hydroxylase), beta polypeptide                                            | 3.88   | 0.10 |
| 218957_s_at | <b>PAAF1</b>    | 80227 proteasomal ATPase-associated factor 1                                                                                                   | -2.31  | 0.10 |
| 224658_x_at | <b>PACS1</b>    | 55690 phosphofurin acidic cluster sorting protein 1<br>protein kinase C and casein kinase substrate in                                         | -14.54 | 0.10 |
| 227053_at   | <b>PACSIN1</b>  | 29993 neurons 1                                                                                                                                | -2.25  | 0.37 |
| 220001_at   | <b>PADI4</b>    | 23569 peptidyl arginine deiminase, type IV<br>phosphoprotein associated with glycosphingolipid                                                 | -9.03  | 0.00 |
| 225626_at   | <b>PAG1</b>     | 55824 microdomains 1                                                                                                                           | 2.19   | 0.00 |
| 206897_at   | <b>PAGE1</b>    | 8712 P antigen family, member 1 (prostate associated)<br>p21/Cdc42/Rac1-activated kinase 1 (STE20)                                             | 2.35   | 0.13 |
| 226507_at   | <b>PAK1</b>     | 5058 homolog, yeast)                                                                                                                           | -6.70  | 0.00 |
| 1557535_at  | <b>PALLD</b>    | 23022 Palladin, cytoskeletal associated protein<br>PAN3 polyA specific ribonuclease subunit                                                    | 3.61   | 0.37 |
| 225563_at   | <b>PAN3</b>     | 255967 homolog (S. cerevisiae)                                                                                                                 | -2.18  | 0.00 |
| 239067_s_at | <b>PANX2</b>    | 56666 pannexin 2                                                                                                                               | -14.66 | 0.00 |
| 229043_at   | <b>PAPD5</b>    | 64282 PAP associated domain containing 5                                                                                                       | -3.50  | 0.22 |

|             |                    |                                                                                                                          |        |      |
|-------------|--------------------|--------------------------------------------------------------------------------------------------------------------------|--------|------|
| 218543_s_at | <b>PARP12</b>      | 64761 poly (ADP-ribose) polymerase family, member 12                                                                     | 3.73   | 0.22 |
| 219034_at   | <b>PARP16</b>      | 54956 poly (ADP-ribose) polymerase family, member 16                                                                     | -4.39  | 0.37 |
| 219033_at   | <b>PARP8</b>       | 79668 poly (ADP-ribose) polymerase family, member 8                                                                      | -2.20  | 0.06 |
| 223220_s_at | <b>PARP9</b>       | 83666 poly (ADP-ribose) polymerase family, member 9                                                                      | 2.70   | 0.00 |
| 243468_at   | <b>PATE</b>        | 160065 expressed in prostate and testis                                                                                  | 2.14   | 0.37 |
| 202876_s_at | <b>PBX2</b>        | 5089 pre-B-cell leukemia homeobox 2<br>pre-B-cell leukemia homeobox interacting protein                                  | -2.34  | 0.13 |
| 214177_s_at | <b>PBXIP1</b>      | 57326 1                                                                                                                  | -4.69  | 0.00 |
| 203845_at   | <b>PCAF</b>        | 8850 p300/CBP-associated factor                                                                                          | -3.58  | 0.22 |
| 211365_s_at | <b>PCDHA2</b>      | 56146 protocadherin alpha 2                                                                                              | 2.31   | 0.13 |
|             |                    | 26025 /// protocadherin gamma subfamily C, 3 ///                                                                         |        |      |
|             |                    | 5098 /// protocadherin gamma subfamily B, 4 ///                                                                          |        |      |
|             |                    | 56097 /// protocadherin gamma subfamily A, 8 ///                                                                         |        |      |
|             |                    | 56098 /// protocadherin gamma subfamily A, 12 ///                                                                        |        |      |
|             |                    | 56099 /// protocadherin gamma subfamily C, 5 ///                                                                         |        |      |
|             |                    | 56100 /// protocadherin gamma subfamily C, 4 ///                                                                         |        |      |
|             |                    | 56101 /// protocadherin gamma subfamily B, 7 ///                                                                         |        |      |
|             |                    | 56102 /// protocadherin gamma subfamily B, 6 ///                                                                         |        |      |
|             |                    | 56103 /// protocadherin gamma subfamily B, 5 ///                                                                         |        |      |
|             |                    | 56104 /// protocadherin gamma subfamily B, 3 ///                                                                         |        |      |
|             |                    | 56105 /// protocadherin gamma subfamily B, 2 ///                                                                         |        |      |
|             |                    | 56106 /// protocadherin gamma subfamily B, 1 ///                                                                         |        |      |
|             |                    | 56107 /// protocadherin gamma subfamily A, 11 ///                                                                        |        |      |
|             |                    | 56108 /// protocadherin gamma subfamily A, 10 ///                                                                        |        |      |
|             |                    | 56109 /// protocadherin gamma subfamily A, 9 ///                                                                         |        |      |
|             |                    | 56110 /// protocadherin gamma subfamily A, 7 ///                                                                         |        |      |
|             |                    | 56111 /// protocadherin gamma subfamily A, 6 ///                                                                         |        |      |
|             |                    | 56112 /// protocadherin gamma subfamily A, 5 ///                                                                         |        |      |
|             |                    | 56113 /// protocadherin gamma subfamily A, 4 ///                                                                         |        |      |
|             |                    | 56114 /// protocadherin gamma subfamily A, 3 ///                                                                         |        |      |
|             |                    | 8641 /// protocadherin gamma subfamily A, 2 ///                                                                          |        |      |
| 211066_x_at | <b>#####</b>       | 9708 protocadherin gamma subfamily A, 1                                                                                  | 2.21   | 0.22 |
|             | <b>PCDHGA10</b>    |                                                                                                                          |        |      |
|             | ///                |                                                                                                                          |        |      |
|             | <b>PCDHGA11</b>    | 26025 /// protocadherin gamma subfamily A, 12 ///                                                                        |        |      |
|             | ///                | 56105 /// protocadherin gamma subfamily A, 11 ///                                                                        |        |      |
|             | <b>PCDHGA12</b>    | 56106 /// protocadherin gamma subfamily A, 10 ///                                                                        |        |      |
|             | /// <b>PCDHGA3</b> | 56109 /// protocadherin gamma subfamily A, 6 ///                                                                         |        |      |
|             | /// <b>PCDHGA5</b> | 56110 /// protocadherin gamma subfamily A, 5 ///                                                                         |        |      |
| 211876_x_at | /// <b>PCDHGA6</b> | 56112 protocadherin gamma subfamily A, 3                                                                                 | 2.04   | 0.03 |
| 209996_x_at | <b>PCM1</b>        | 5108 pericentriolar material 1<br>protein-L-isoaspartate (D-aspartate) O-                                                | -3.53  | 0.03 |
| 212406_s_at | <b>PCMTD2</b>      | 55251 methyltransferase domain containing 2                                                                              | -12.27 | 0.00 |
| 213173_at   | <b>PCNX</b>        | 22990 pecanex homolog (Drosophila)                                                                                       | -2.26  | 0.22 |
| 212422_at   | <b>PDCD11</b>      | 22984 programmed cell death 11<br>programmed cell death 4 (neoplastic                                                    | 2.46   | 0.06 |
| 212593_s_at | <b>PDCD4</b>       | 27250 transformation inhibitor)                                                                                          | -2.29  | 0.03 |
| 204134_at   | <b>PDE2A</b>       | 5138 phosphodiesterase 2A, cGMP-stimulated                                                                               | 57.41  | 0.00 |
| 208591_s_at | <b>PDE3B</b>       | 5140 phosphodiesterase 3B, cGMP-inhibited<br>phosphodiesterase 4B, cAMP-specific<br>(phosphodiesterase E4 dunce homolog, | -12.41 | 0.22 |
| 203708_at   | <b>PDE4B</b>       | 5142 Drosophila)<br>phosphodiesterase 4D interacting protein                                                             | 2.11   | 0.10 |
| 205872_x_at | <b>PDE4DIP</b>     | 9659 (myomegalin)                                                                                                        | 12.59  | 0.00 |



|             |                |                                                                                                     |        |      |
|-------------|----------------|-----------------------------------------------------------------------------------------------------|--------|------|
| 208911_s_at | <b>PDHB</b>    | 5162 pyruvate dehydrogenase (lipoamide) beta                                                        | -3.34  | 0.00 |
| 208612_at   | <b>PDIA3</b>   | 2923 protein disulfide isomerase family A, member 3                                                 | 2.62   | 0.00 |
| 211048_s_at | <b>PDIA4</b>   | 9601 protein disulfide isomerase family A, member 4                                                 | 3.60   | 0.58 |
| 208639_x_at | <b>PDIA6</b>   | 10130 protein disulfide isomerase family A, member 6                                                | 2.40   | 0.10 |
| 226452_at   | <b>PDK1</b>    | 5163 pyruvate dehydrogenase kinase, isozyme 1                                                       | -3.37  | 0.00 |
| 221957_at   | <b>PDK3</b>    | 5165 pyruvate dehydrogenase kinase, isozyme 3                                                       | -11.20 | 0.03 |
| 219165_at   | <b>PDLIM2</b>  | 64236 PDZ and LIM domain 2 (mystique)                                                               | -4.83  | 0.58 |
| 221898_at   | <b>PDPN</b>    | 10630 podoplanin<br>PDS5, regulator of cohesion maintenance,                                        | 9.33   | 0.13 |
| 207956_x_at | <b>PDS5B</b>   | 23047 homolog B (S. cerevisiae)                                                                     | -4.05  | 0.03 |
| 213549_at   | <b>PDZD8</b>   | 118987 PDZ domain containing 8                                                                      | -7.65  | 0.13 |
| 200788_s_at | <b>PEA15</b>   | 8682 phosphoprotein enriched in astrocytes 15<br>platelet/endothelial cell adhesion molecule (CD31  | 2.73   | 0.37 |
| 208982_at   | <b>PECAM1</b>  | 5175 antigen)                                                                                       | -6.44  | 0.00 |
| 232304_at   | <b>PELI1</b>   | 57162 Pellino homolog 1 (Drosophila)                                                                | -3.85  | 0.10 |
| 219132_at   | <b>PELI2</b>   | 57161 pellino homolog 2 (Drosophila)                                                                | -6.28  | 0.00 |
| 218472_s_at | <b>PELO</b>    | 53918 pelota homolog (Drosophila)                                                                   | -2.46  | 0.37 |
| 214753_at   | <b>PFAAP5</b>  | 10443 Phosphonoformate immuno-associated protein 5                                                  | 2.25   | 0.37 |
| 218336_at   | <b>PFDN2</b>   | 5202 prefoldin subunit 2<br>6-phosphofructo-2-kinase/fructose-2,6-                                  | 3.26   | 0.37 |
| 228499_at   | <b>PFKFB4</b>  | 5210 biphosphatase 4                                                                                | -12.70 | 0.13 |
| 204604_at   | <b>PFTK1</b>   | 5218 PFTAIRE protein kinase 1                                                                       | -2.12  | 0.37 |
| 201118_at   | <b>PGD</b>     | 5226 phosphogluconate dehydrogenase                                                                 | -2.18  | 0.00 |
| 207384_at   | <b>PGLYRP1</b> | 8993 peptidoglycan recognition protein 1                                                            | -8.21  | 0.10 |
| 201968_s_at | <b>PGM1</b>    | 5236 phosphoglucomutase 1                                                                           | -8.65  | 0.22 |
| 223738_s_at | <b>PGM2</b>    | 55276 phosphoglucomutase 2                                                                          | -12.47 | 0.03 |
| 1560431_at  | <b>PGM5P1</b>  | 653394 phosphoglucomutase 5 pseudogene 1                                                            | -2.35  | 0.22 |
| 213638_at   | <b>PHACTR1</b> | 221692 phosphatase and actin regulator 1                                                            | 17.73  | 0.00 |
| 204048_s_at | <b>PHACTR2</b> | 9749 phosphatase and actin regulator 2                                                              | 7.49   | 0.13 |
| 225958_at   | <b>PHC1</b>    | 1911 polyhomeotic homolog 1 (Drosophila)                                                            | 12.55  | 0.00 |
| 200919_at   | <b>PHC2</b>    | 1912 polyhomeotic homolog 2 (Drosophila)                                                            | -4.35  | 0.00 |
| 234939_s_at | <b>PHF12</b>   | 57649 PHD finger protein 12                                                                         | -4.18  | 0.22 |
| 225820_at   | <b>PHF17</b>   | 79960 PHD finger protein 17                                                                         | -8.52  | 0.10 |
| 219606_at   | <b>PHF20L1</b> | 51105 PHD finger protein 20-like 1                                                                  | -2.07  | 0.37 |
| 203278_s_at | <b>PHF21A</b>  | 51317 PHD finger protein 21A                                                                        | -3.45  | 0.00 |
| 217951_s_at | <b>PHF3</b>    | 23469 PHD finger protein 3                                                                          | -2.90  | 0.03 |
| 212542_s_at | <b>PHIP</b>    | 55023 pleckstrin homology domain interacting protein<br>pleckstrin homology-like domain, family A,  | -2.96  | 0.22 |
| 217996_at   | <b>PHLDA1</b>  | 22822 member 1<br>pleckstrin homology-like domain, family A,                                        | 73.93  | 0.03 |
| 209803_s_at | <b>PHLDA2</b>  | 7262 member 2<br>PH domain and leucine rich repeat protein                                          | 536.48 | 0.00 |
| 212719_at   | <b>PHLPP</b>   | 23239 phosphatase                                                                                   | -5.82  | 0.00 |
| 215285_s_at | <b>PHTF1</b>   | 10745 putative homeodomain transcription factor 1                                                   | -6.72  | 0.58 |
| 41469_at    | <b>PI3</b>     | 5266 peptidase inhibitor 3, skin-derived (SKALP)                                                    | 5.18   | 0.00 |
| 222631_at   | <b>PI4K2B</b>  | 55300 phosphatidylinositol 4-kinase type 2 beta<br>phosphatidylinositol glycan anchor biosynthesis, | 5.18   | 0.22 |
| 242760_x_at | <b>PIGB</b>    | 9488 class B<br>phosphatidylinositol glycan anchor biosynthesis,                                    | -9.69  | 0.00 |
| 209707_at   | <b>PIGK</b>    | 10026 class K<br>phosphatidylinositol glycan anchor biosynthesis,                                   | -4.68  | 0.03 |
| 1552291_at  | <b>PIGX</b>    | 54965 class X                                                                                       | -10.92 | 0.00 |
| 1554508_at  | <b>PIK3AP1</b> | 118788 phosphoinositide-3-kinase adaptor protein 1<br>phosphoinositide-3-kinase, catalytic, delta   | 5.35   | 0.00 |
| 203879_at   | <b>PIK3CD</b>  | 5293 polypeptide                                                                                    | -3.35  | 0.00 |
| 209019_s_at | <b>PINK1</b>   | 65018 PTEN induced putative kinase 1                                                                | -7.36  | 0.00 |
| 214735_at   | <b>PIP3-E</b>  | 26034 phosphoinositide-binding protein PIP3-E                                                       | -6.86  | 0.06 |

|              |                |                                                                                       |        |      |
|--------------|----------------|---------------------------------------------------------------------------------------|--------|------|
| 212829_at    | <b>PIP4K2A</b> | 5305 phosphatidylinositol-5-phosphate 4-kinase, type II, alpha                        | -2.44  | 0.37 |
| 219155_at    | <b>PITPNC1</b> | 26207 phosphatidylinositol transfer protein, cytoplasmic 1                            | -6.16  | 0.58 |
| 1561849_at   | <b>PKD1L2</b>  | 114780 polycystic kidney disease 1-like 2                                             | 2.53   | 0.37 |
| 212629_s_at  | <b>PKN2</b>    | 5586 protein kinase N2                                                                | -6.89  | 0.00 |
| 204196_x_at  | <b>PKNOX1</b>  | 5316 PBX/knotted 1 homeobox 1                                                         | -4.07  | 0.58 |
| 206214_at    | <b>PLA2G7</b>  | 7941 phospholipase A2, group VII (platelet-activating factor acetylhydrolase, plasma) | 29.11  | 0.00 |
| 219014_at    | <b>PLAC8</b>   | 51316 placenta-specific 8                                                             | 15.76  | 0.00 |
| 202925_s_at  | <b>PLAGL2</b>  | 5326 pleiomorphic adenoma gene-like 2                                                 | 18.65  | 0.00 |
| 205479_s_at  | <b>PLAU</b>    | 5328 plasminogen activator, urokinase                                                 | 53.59  | 0.00 |
| 211924_s_at  | <b>PLAUR</b>   | 5329 plasminogen activator, urokinase receptor                                        | 6.19   | 0.00 |
| 204046_at    | <b>PLCB2</b>   | 5330 phospholipase C, beta 2                                                          | -9.24  | 0.58 |
| 213309_at    | <b>PLCL2</b>   | 23228 phospholipase C-like 2                                                          | -6.00  | 0.37 |
| 226636_at    | <b>PLD1</b>    | 5337 phospholipase D1, phosphatidylcholine-specific                                   | 2.76   | 0.58 |
| 224892_at    | <b>PLDN</b>    | 26258 pallidin homolog (mouse)                                                        | 3.41   | 0.06 |
| 203470_s_at  | <b>PLEK</b>    | 5341 pleckstrin                                                                       | 2.68   | 0.00 |
| 201411_s_at  | <b>PLEKHB2</b> | 55041 pleckstrin homology domain containing, family B (evectins) member 2             | 4.63   | 0.00 |
| 217044_s_at  | <b>PLEKHG3</b> | 26030 pleckstrin homology domain containing, family G (with RhoGef domain) member 3   | -3.45  | 0.03 |
| 220073_s_at  | <b>PLEKHG6</b> | 55200 pleckstrin homology domain containing, family G (with RhoGef domain) member 6   | -3.12  | 0.10 |
| 218290_at    | <b>PLEKHJ1</b> | 55111 pleckstrin homology domain containing, family J member 1                        | -2.95  | 0.22 |
| 230120_s_at  | <b>PLGLB1</b>  | 5343 plasminogen-like B1                                                              | -3.14  | 0.37 |
| 214415_at    | <b>PLGLB2</b>  | 5342 plasminogen-like B2 /// plasminogen-like B1                                      | -5.40  | 0.10 |
| 204958_at    | <b>PLK3</b>    | 1263 polo-like kinase 3 (Drosophila)                                                  | 6.87   | 0.03 |
| 201136_at    | <b>PLP2</b>    | 5355 proteolipid protein 2 (colonic epithelium-enriched)                              | -3.03  | 0.13 |
| 202430_s_at  | <b>PLSCR1</b>  | 5359 phospholipid scramblase 1                                                        | 3.80   | 0.00 |
| 227276_at    | <b>PLXDC2</b>  | 84898 plexin domain containing 2                                                      | -16.40 | 0.00 |
| 207290_at    | <b>PLXNA2</b>  | 5362 plexin A2                                                                        | 3.02   | 0.58 |
| 1553139_s_at | <b>PLXNA3</b>  | 55558 plexin A3                                                                       | 4.10   | 0.37 |
| 206470_at    | <b>PLXNC1</b>  | 10154 plexin C1                                                                       | -2.01  | 0.03 |
| 38671_at     | <b>PLXND1</b>  | 23129 plexin D1                                                                       | 4.78   | 0.06 |
| 204285_s_at  | <b>PMAIP1</b>  | 5366 phorbol-12-myristate-13-acetate-induced protein 1                                | 2.60   | 0.00 |
| 209640_at    | <b>PML</b>     | 5371 promyelocytic leukemia                                                           | 3.66   | 0.22 |
| 210139_s_at  | <b>PMP22</b>   | 5376 peripheral myelin protein 22                                                     | 4.02   | 0.22 |
| 223310_x_at  | <b>PNPLA8</b>  | 50640 patatin-like phospholipase domain containing 8                                  | 3.10   | 0.00 |
| 204835_at    | <b>POLA1</b>   | 5422 polymerase (DNA directed), alpha 1                                               | -2.79  | 0.06 |
| 210910_s_at  | <b>POMZP3</b>  | 22932 POM (POM121 homolog, rat) and ZP3 fusion                                        | 3.44   | 0.58 |
| 217848_s_at  | <b>PPA1</b>    | 5464 pyrophosphatase (inorganic) 1                                                    | 6.63   | 0.06 |
| 212230_at    | <b>PPAP2B</b>  | 8613 phosphatidic acid phosphatase type 2B                                            | 153.35 | 0.00 |
| 201490_s_at  | <b>PPIF</b>    | 10105 peptidylprolyl isomerase F (cyclophilin F)                                      | 11.31  | 0.00 |
| 242154_x_at  | <b>PPIL5</b>   | 122769 peptidylprolyl isomerase (cyclophilin)-like 5                                  | -3.66  | 0.58 |
| 231370_at    | <b>PPM1A</b>   | 5494 protein phosphatase 1A (formerly 2C), magnesium-dependent, alpha isoform         | -2.24  | 0.00 |
| 213225_at    | <b>PPM1B</b>   | 5495 protein phosphatase 1B (formerly 2C), magnesium-dependent, beta isoform          | -2.43  | 0.00 |
| 233911_s_at  | <b>PPM1H</b>   | 57460 protein phosphatase 1H (PP2C domain containing)                                 | -2.30  | 0.58 |
| 1566301_at   | <b>PPP1R11</b> | 6992 Protein phosphatase 1, regulatory (inhibitor) subunit 11                         | 2.40   | 0.37 |

|              |                 |                                                                                                                                      |        |      |
|--------------|-----------------|--------------------------------------------------------------------------------------------------------------------------------------|--------|------|
| 201958_s_at  | <b>PPP1R12B</b> | 4660 protein phosphatase 1, regulatory (inhibitor) subunit 12B                                                                       | -25.71 | 0.00 |
| 202014_at    | <b>PPP1R15A</b> | 23645 protein phosphatase 1, regulatory (inhibitor) subunit 15A                                                                      | 4.55   | 0.00 |
| 211169_s_at  | <b>PPP1R3A</b>  | 5506 protein phosphatase 1, regulatory (inhibitor) subunit 3A (glycogen and sarcoplasmic reticulum binding subunit, skeletal muscle) | 2.11   | 0.13 |
| 204554_at    | <b>PPP1R3D</b>  | 5509 protein phosphatase 1, regulatory (inhibitor) subunit 3D                                                                        | -6.08  | 0.03 |
| 202187_s_at  | <b>PPP2R5A</b>  | 5525 protein phosphatase 2, regulatory subunit B', alpha isoform                                                                     | -10.40 | 0.00 |
| 202425_x_at  | <b>PPP3CA</b>   | 5530 protein phosphatase 3 (formerly 2B), catalytic subunit, alpha isoform                                                           | -3.68  | 0.00 |
| 201594_s_at  | <b>PPP4R1</b>   | 9989 protein phosphatase 4, regulatory subunit 1                                                                                     | -11.22 | 0.00 |
| 225429_at    | <b>PPP6C</b>    | 5537 protein phosphatase 6, catalytic subunit palmitoyl-protein thioesterase 1 (ceroid-lipofuscinosis, neuronal 1, infantile)        | -2.35  | 0.58 |
| 200975_at    | <b>PPT1</b>     | 5538 lipofuscinosis, neuronal 1, infantile                                                                                           | -5.41  | 0.00 |
| 241742_at    | <b>PRAM1</b>    | 84106 PML-RARA regulated adaptor molecule 1                                                                                          | -3.61  | 0.03 |
| 201494_at    | <b>PRCP</b>     | 5547 prolylcarboxypeptidase (angiotensinase C)                                                                                       | -3.71  | 0.00 |
| 208680_at    | <b>PRDX1</b>    | 5052 peroxiredoxin 1                                                                                                                 | 3.61   | 0.58 |
| 201619_at    | <b>PRDX3</b>    | 10935 peroxiredoxin 3                                                                                                                | -3.67  | 0.06 |
| 211743_s_at  | <b>PRG2</b>     | 5553 proteoglycan 2, bone marrow (natural killer cell activator, eosinophil granule major basic protein)                             | 3.27   | 0.00 |
| 226069_at    | <b>PRICKLE1</b> | 144165 prickle homolog 1 (Drosophila)                                                                                                | -2.29  | 0.10 |
| 218292_s_at  | <b>PRKAG2</b>   | 51422 protein kinase, AMP-activated, gamma 2 non-catalytic subunit                                                                   | 2.14   | 0.03 |
| 223904_at    | <b>PRKAG3</b>   | 53632 protein kinase, AMP-activated, gamma 3 non-catalytic subunit                                                                   | 2.07   | 0.22 |
| 225011_at    | <b>PRKAR2A</b>  | 5576 Protein kinase, cAMP-dependent, regulatory, type II, alpha                                                                      | -2.98  | 0.22 |
| 209685_s_at  | <b>PRKCB1</b>   | 5579 protein kinase C, beta 1                                                                                                        | -2.34  | 0.00 |
| 206099_at    | <b>PRKCH</b>    | 5583 protein kinase C, eta                                                                                                           | 14.83  | 0.00 |
| 210543_s_at  | <b>PRKDC</b>    | 5591 protein kinase, DNA-activated, catalytic polypeptide                                                                            | -7.79  | 0.00 |
| 231758_at    | <b>PRM3</b>     | 58531 protamine 3                                                                                                                    | 2.06   | 0.37 |
| 1564520_s_at | <b>PRMT5</b>    | 10419 protein arginine methyltransferase 5                                                                                           | -4.02  | 0.58 |
| 201300_s_at  | <b>PRNP</b>     | 5621 prion protein (p27-30) (Creutzfeldt-Jakob disease, Gerstmann-Strausler-Scheinker syndrome, fatal familial insomnia)             | 8.61   | 0.37 |
| 232629_at    | <b>PROK2</b>    | 60675 prokineticin 2                                                                                                                 | -4.17  | 0.00 |
| 221546_at    | <b>PRPF18</b>   | 8559 PRP18 pre-mRNA processing factor 18 homolog (S. cerevisiae)                                                                     | -3.37  | 0.13 |
| 202529_at    | <b>PRPSAP1</b>  | 5635 phosphoribosyl pyrophosphate synthetase-associated protein 1                                                                    | 3.11   | 0.13 |
| 238513_at    | <b>PRRG4</b>    | 79056 Proline rich Gla (G-carboxyglutamic acid) 4 (transmembrane)                                                                    | -3.33  | 0.00 |
| 209337_at    | <b>PSIP1</b>    | 11168 PC4 and SFRS1 interacting protein 1                                                                                            | -4.38  | 0.37 |
| 201676_x_at  | <b>PSMA1</b>    | 5682 proteasome (prosome, macropain) subunit, alpha type, 1                                                                          | 2.74   | 0.03 |
| 201532_at    | <b>PSMA3</b>    | 5684 proteasome (prosome, macropain) subunit, alpha type, 3                                                                          | 2.93   | 0.10 |
| 201274_at    | <b>PSMA5</b>    | 5686 proteasome (prosome, macropain) subunit, alpha type, 5                                                                          | 3.87   | 0.00 |
| 208805_at    | <b>PSMA6</b>    | 5687 proteasome (prosome, macropain) subunit, alpha type, 6                                                                          | 5.02   | 0.00 |
| 200786_at    | <b>PSMB7</b>    | 5695 proteasome (prosome, macropain) subunit, beta type, 7                                                                           | -2.18  | 0.58 |
| 201068_s_at  | <b>PSMC2</b>    | 5701 proteasome (prosome, macropain) 26S subunit, ATPase, 2                                                                          | 2.61   | 0.00 |

|              |                  |                                                                                                                      |        |      |
|--------------|------------------|----------------------------------------------------------------------------------------------------------------------|--------|------|
| 203447_at    | <b>PSMD5</b>     | 5711 proteasome (prosome, macropain) 26S subunit, non-ATPase, 5                                                      | 4.48   | 0.03 |
| 1555884_at   | <b>PSMD6</b>     | 9861 Proteasome (prosome, macropain) 26S subunit, non-ATPase, 6                                                      | -3.53  | 0.06 |
| 200820_at    | <b>PSMD8</b>     | 5714 proteasome (prosome, macropain) 26S subunit, non-ATPase, 8                                                      | 2.52   | 0.58 |
| 207805_s_at  | <b>PSMD9</b>     | 5715 proteasome (prosome, macropain) 26S subunit, non-ATPase, 9                                                      | -2.74  | 0.03 |
| 201762_s_at  | <b>PSME2</b>     | 5721 proteasome (prosome, macropain) activator subunit 2 (PA28 beta)                                                 | 2.94   | 0.00 |
| 211178_s_at  | <b>PSTPIP1</b>   | 9051 proline-serine-threonine phosphatase interacting protein 1                                                      | -2.87  | 0.22 |
| 219938_s_at  | <b>PSTPIP2</b>   | 9050 proline-serine-threonine phosphatase interacting protein 2                                                      | 5.64   | 0.00 |
| 204053_x_at  | <b>PTEN</b>      | 5728 phosphatase and tensin homolog (mutated in multiple advanced cancers 1)                                         | -2.69  | 0.00 |
| 217494_s_at  | <b>PTENP1</b>    | 11191 phosphatase and tensin homolog (mutated in multiple advanced cancers 1), pseudogene 1                          | -3.39  | 0.00 |
| 206631_at    | <b>PTGER2</b>    | 5732 prostaglandin E receptor 2 (subtype EP2), 53kDa                                                                 | 6.90   | 0.00 |
| 204897_at    | <b>PTGER4</b>    | 5734 prostaglandin E receptor 4 (subtype EP4)                                                                        | 3.05   | 0.00 |
| 210367_s_at  | <b>PTGES</b>     | 9536 prostaglandin E synthase                                                                                        | 13.26  | 0.00 |
| 238669_at    | <b>PTGS1</b>     | 5742 prostaglandin-endoperoxide synthase 1 (prostaglandin G/H synthase and cyclooxygenase)                           | -2.50  | 0.22 |
| 1554997_a_at | <b>PTGS2</b>     | 5743 prostaglandin-endoperoxide synthase 2 (prostaglandin G/H synthase and cyclooxygenase)                           | 3.31   | 0.03 |
| 206574_s_at  | <b>PTP4A3</b>    | 11156 protein tyrosine phosphatase type IVA, member 3 protein tyrosine phosphatase-like A domain                     | 2.39   | 0.13 |
| 244050_at    | <b>PTPLAD2</b>   | 401494 containing 2                                                                                                  | -11.49 | 0.00 |
| 203555_at    | <b>PTPN18</b>    | 26469 protein tyrosine phosphatase, non-receptor type 18 (brain-derived)                                             | -3.01  | 0.58 |
| 213137_s_at  | <b>PTPN2</b>     | 5771 protein tyrosine phosphatase, non-receptor type 2                                                               | 3.07   | 0.10 |
| 223150_s_at  | <b>PTPN23</b>    | 25930 protein tyrosine phosphatase, non-receptor type 23                                                             | 4.08   | 0.22 |
| 206157_at    | <b>PTX3</b>      | 5806 pentraxin-related gene, rapidly induced by IL-1 beta                                                            | 12.22  | 0.06 |
| 1552274_at   | <b>PXK</b>       | 54899 PX domain containing serine/threonine kinase                                                                   | -3.08  | 0.22 |
| 201087_at    | <b>PXN</b>       | 5829 paxillin                                                                                                        | -5.52  | 0.00 |
| 221666_s_at  | <b>PYCARD</b>    | 29108 PYD and CARD domain containing phosphorylase, glycogen; liver (Hers disease, glycogen storage disease type VI) | -7.31  | 0.13 |
| 202990_at    | <b>PYGL</b>      | 5836 glycogen storage disease type VI                                                                                | -29.28 | 0.00 |
| 219681_s_at  | <b>RAB11FIP1</b> | 80223 RAB11 family interacting protein 1 (class I)                                                                   | -6.60  | 0.00 |
| 202252_at    | <b>RAB13</b>     | 5872 RAB13, member RAS oncogene family                                                                               | 3.24   | 0.00 |
| 207791_s_at  | <b>RAB1A</b>     | 5861 RAB1A, member RAS oncogene family                                                                               | 2.30   | 0.00 |
| 219622_at    | <b>RAB20</b>     | 55647 RAB20, member RAS oncogene family                                                                              | 6.75   | 0.00 |
| 203885_at    | <b>RAB21</b>     | 23011 RAB21, member RAS oncogene family                                                                              | 2.55   | 0.00 |
| 217762_s_at  | <b>RAB31</b>     | 11031 RAB31, member RAS oncogene family                                                                              | -2.34  | 0.00 |
| 228113_at    | <b>RAB37</b>     | 326624 RAB37, member RAS oncogene family                                                                             | -12.35 | 0.00 |
| 225001_at    | <b>RAB3D</b>     | 9545 RAB3D, member RAS oncogene family                                                                               | -3.53  | 0.00 |
| 203581_at    | <b>RAB4A</b>     | 5867 RAB4A, member RAS oncogene family                                                                               | -2.85  | 0.22 |
| 203136_at    | <b>RABAC1</b>    | 10567 Rab acceptor 1 (prenylated)                                                                                    | -2.59  | 0.22 |
| 203150_at    | <b>RABEPK</b>    | 10244 Rab9 effector protein with kelch motifs                                                                        | -2.86  | 0.58 |
| 203020_at    | <b>RABGAP1L</b>  | 9910 RAB GTPase activating protein 1-like                                                                            | -9.94  | 0.00 |
| 218310_at    | <b>RABGEF1</b>   | 27342 RAB guanine nucleotide exchange factor (GEF) 1                                                                 | 3.93   | 0.06 |
| 201046_s_at  | <b>RAD23A</b>    | 5886 RAD23 homolog A (S. cerevisiae)                                                                                 | 3.93   | 0.13 |

|             |                   |                                                                                                     |        |      |
|-------------|-------------------|-----------------------------------------------------------------------------------------------------|--------|------|
| 201244_s_at | <b>RAF1</b>       | 5894 v-raf-1 murine leukemia viral oncogene homolog 1                                               | -2.48  | 0.10 |
| 202844_s_at | <b>RALBP1</b>     | 10928 ralA binding protein 1                                                                        | -12.30 | 0.00 |
| 209050_s_at | <b>RALGDS</b>     | 5900 ral guanine nucleotide dissociation stimulator                                                 | 109.60 | 0.00 |
| 210552_s_at | <b>RALGPS1</b>    | 9649 Ral GEF with PH domain and SH3 binding motif 1                                                 | 2.67   | 0.00 |
| 232112_at   | <b>RALGPS2</b>    | 55103 Ral GEF with PH domain and SH3 binding motif 2                                                | -5.29  | 0.10 |
| 201271_s_at | <b>RALY</b>       | RNA binding protein, autoantigenic (hnRNP-<br>22913 associated with lethal yellow homolog (mouse))  | -3.60  | 0.58 |
| 201713_s_at | <b>RANBP2</b>     | 5903 RAN binding protein 2                                                                          | 5.37   | 0.00 |
|             | <b>RANBP2 ///</b> | 285190 ///                                                                                          |        |      |
|             | <b>RGPD1 ///</b>  | 400966 ///                                                                                          |        |      |
|             | <b>RGPD2 ///</b>  | 5903 ///                                                                                            |        |      |
|             | <b>RGPD3 ///</b>  | 652919 ///                                                                                          |        |      |
|             | <b>RGPD4 ///</b>  | 653489 ///                                                                                          |        |      |
|             | <b>RGPD5 ///</b>  | 727851 ///                                                                                          |        |      |
|             | <b>RGPD6 ///</b>  | 729540 ///                                                                                          |        |      |
|             | <b>RGPD7 ///</b>  | 729857 ///                                                                                          |        |      |
| 242712_x_at | <b>RGPD8</b>      | 84220 domain containing 2                                                                           | 3.12   | 0.22 |
| 218668_s_at | <b>RAP2C</b>      | 57826 RAP2C, member of RAS oncogene family                                                          | 2.15   | 0.37 |
| 203097_s_at | <b>RAPGEF2</b>    | 9693 Rap guanine nucleotide exchange factor (GEF) 2                                                 | -2.36  | 0.00 |
| 203749_s_at | <b>RARA</b>       | 5914 retinoic acid receptor, alpha<br>retinoic acid receptor responder (tazarotene                  | -2.45  | 0.37 |
| 204070_at   | <b>RARRES3</b>    | 5920 induced) 3<br>RAS guanyl releasing protein 2 (calcium and DAG-                                 | 3.07   | 0.00 |
| 208206_s_at | <b>RASGRP2</b>    | 10235 regulated)                                                                                    | -4.81  | 0.00 |
| 240862_at   | <b>RASGRP4</b>    | 115727 RAS guanyl releasing protein 4                                                               | -4.79  | 0.00 |
| 204346_s_at | <b>RASSF1</b>     | 11186 Ras association (RalGDS/AF-6) domain family 1                                                 | -7.44  | 0.06 |
| 226436_at   | <b>RASSF4</b>     | 83937 Ras association (RalGDS/AF-6) domain family 4                                                 | 5.99   | 0.06 |
| 202034_x_at | <b>RB1CC1</b>     | 9821 RB1-inducible coiled-coil 1                                                                    | -3.06  | 0.03 |
| 212783_at   | <b>RBBP6</b>      | 5930 retinoblastoma binding protein 6                                                               | 2.05   | 0.13 |
| 232751_at   | <b>RBBP9</b>      | 10741 retinoblastoma binding protein 9                                                              | 2.64   | 0.13 |
| 212331_at   | <b>RBL2</b>       | 5934 retinoblastoma-like 2 (p130)                                                                   | -6.83  | 0.00 |
| 224781_s_at | <b>RBM17</b>      | 84991 RNA binding motif protein 17                                                                  | 2.48   | 0.03 |
| 218593_at   | <b>RBM28</b>      | 55131 RNA binding motif protein 28                                                                  | 4.52   | 0.58 |
| 225839_at   | <b>RBM33</b>      | 155435 RNA binding motif protein 33                                                                 | -2.34  | 0.10 |
| 214943_s_at | <b>RBM34</b>      | 23029 RNA binding motif protein 34                                                                  | 3.46   | 0.03 |
| 225139_at   | <b>RBM35B</b>     | 80004 RNA binding motif protein 35B                                                                 | -4.47  | 0.03 |
| 238066_at   | <b>RBP7</b>       | 116362 retinol binding protein 7, cellular<br>recombination signal binding protein for              | -39.76 | 0.00 |
| 207785_s_at | <b>RBPJ</b>       | 3516 immunoglobulin kappa J region                                                                  | -3.34  | 0.00 |
| 208370_s_at | <b>RCAN1</b>      | 1827 regulator of calcineurin 1<br>regulator of chromosome condensation (RCC1)                      | 4.41   | 0.00 |
| 204759_at   | <b>RCBTB2</b>     | 1102 and BTB (POZ) domain containing protein 2<br>ring finger and CHY zinc finger domain containing | -12.57 | 0.00 |
| 214281_s_at | <b>RCHY1</b>      | 25898 1                                                                                             | 2.83   | 0.03 |
| 61734_at    | <b>RCN3</b>       | 57333 reticulocalbin 3, EF-hand calcium binding domain                                              | -2.83  | 0.10 |
| 222605_at   | <b>RCOR3</b>      | 55758 REST corepressor 3                                                                            | -2.06  | 0.22 |

|              |                |                                                                                                                                                    |        |      |
|--------------|----------------|----------------------------------------------------------------------------------------------------------------------------------------------------|--------|------|
| 205407_at    | <b>RECK</b>    | reversion-inducing-cysteine-rich protein with kazal<br>8434 motifs                                                                                 | 5.25   | 0.58 |
| 208873_s_at  | <b>REEP5</b>   | 7905 receptor accessory protein 5<br>v-rel reticuloendotheliosis viral oncogene homolog                                                            | -7.15  | 0.00 |
| 206035_at    | <b>REL</b>     | 5966 (avian)                                                                                                                                       | 3.80   | 0.00 |
| 201783_s_at  | <b>RELA</b>    | v-rel reticuloendotheliosis viral oncogene homolog<br>A, nuclear factor of kappa light polypeptide gene<br>5970 enhancer in B-cells 3, p65 (avian) | 3.68   | 0.03 |
| 227425_at    | <b>REPS2</b>   | 9185 RALBP1 associated Eps domain containing 2                                                                                                     | -7.64  | 0.00 |
| 200940_s_at  | <b>RERE</b>    | 473 arginine-glutamic acid dipeptide (RE) repeats                                                                                                  | -3.80  | 0.00 |
| 220570_at    | <b>RETN</b>    | 56729 resistin                                                                                                                                     | 7.52   | 0.00 |
| 234950_s_at  | <b>RFWD2</b>   | 64326 ring finger and WD repeat domain 2<br>regulatory factor X, 2 (influences HLA class II<br>expression)                                         | -2.75  | 0.00 |
| 208031_s_at  | <b>RFX2</b>    | 5990 RNA (guanine-9-) methyltransferase domain<br>containing 2                                                                                     | -2.42  | 0.37 |
| 231877_at    | <b>RG9MTD2</b> | 93587 ral guanine nucleotide dissociation stimulator-like                                                                                          | -2.55  | 0.37 |
| 209568_s_at  | <b>RGL1</b>    | 23179 1                                                                                                                                            | 23.72  | 0.00 |
| 202988_s_at  | <b>RGS1</b>    | 5996 regulator of G-protein signaling 1                                                                                                            | 4.01   | 0.58 |
| 38290_at     | <b>RGS14</b>   | 10636 regulator of G-protein signaling 14                                                                                                          | -16.51 | 0.00 |
| 209325_s_at  | <b>RGS16</b>   | 6004 regulator of G-protein signaling 16                                                                                                           | 3.59   | 0.22 |
| 223809_at    | <b>RGS18</b>   | 64407 regulator of G-protein signaling 18                                                                                                          | -14.00 | 0.00 |
| 202388_at    | <b>RGS2</b>    | 5997 regulator of G-protein signaling 2, 24kDa                                                                                                     | -2.18  | 0.00 |
| 219202_at    | <b>RHBDF2</b>  | 79651 rhomboid 5 homolog 2 (Drosophila)                                                                                                            | 10.36  | 0.37 |
| 1552502_s_at | <b>RHBDL2</b>  | 54933 rhomboid, veinlet-like 2 (Drosophila)                                                                                                        | 3.17   | 0.37 |
| 1555780_a_at | <b>RHEB</b>    | 6009 Ras homolog enriched in brain                                                                                                                 | 2.08   | 0.03 |
| 212099_at    | <b>RHOB</b>    | 388 ras homolog gene family, member B                                                                                                              | -3.36  | 0.00 |
| 200885_at    | <b>RHOC</b>    | 389 ras homolog gene family, member C                                                                                                              | 8.50   | 0.00 |
| 219045_at    | <b>RHOF</b>    | 54509 ras homolog gene family, member F (in filopodia)                                                                                             | 2.62   | 0.58 |
| 204951_at    | <b>RHOH</b>    | 399 ras homolog gene family, member H                                                                                                              | 13.43  | 0.06 |
| 223168_at    | <b>RHOU</b>    | 58480 ras homolog gene family, member U                                                                                                            | 10.02  | 0.10 |
| 226312_at    | <b>RICTOR</b>  | 253260 rapamycin-insensitive companion of mTOR                                                                                                     | -2.77  | 0.00 |
| 209684_at    | <b>RIN2</b>    | 54453 Ras and Rab interactor 2                                                                                                                     | 5.63   | 0.37 |
| 219457_s_at  | <b>RIN3</b>    | 79890 Ras and Rab interactor 3                                                                                                                     | -12.15 | 0.58 |
| 209544_at    | <b>RIPK2</b>   | 8767 receptor-interacting serine-threonine kinase 2                                                                                                | 4.75   | 0.06 |
| 204243_at    | <b>RLF</b>     | 6018 rearranged L-myc fusion<br>RMI1, RecQ mediated genome instability 1,                                                                          | 2.79   | 0.13 |
| 218979_at    | <b>RMI1</b>    | 80010 homolog (S. cerevisiae)<br>required for meiotic nuclear division 5 homolog A                                                                 | -8.40  | 0.00 |
| 212482_at    | <b>RMND5A</b>  | 64795 (S. cerevisiae)<br>ribonuclease, RNase A family, 2 (liver, eosinophil-                                                                       | -2.11  | 0.22 |
| 206111_at    | <b>RNASE2</b>  | 6036 derived neurotoxin)                                                                                                                           | -7.92  | 0.37 |
| 217984_at    | <b>RNASET2</b> | 8635 ribonuclease T2                                                                                                                               | -15.93 | 0.00 |
| 208632_at    | <b>RNF10</b>   | 9921 ring finger protein 10                                                                                                                        | -2.53  | 0.37 |
| 217865_at    | <b>RNF130</b>  | 55819 ring finger protein 130                                                                                                                      | -2.12  | 0.06 |
| 223591_at    | <b>RNF135</b>  | 84282 ring finger protein 135                                                                                                                      | -5.09  | 0.13 |
| 226106_at    | <b>RNF141</b>  | 50862 ring finger protein 141                                                                                                                      | -5.93  | 0.00 |
| 227726_at    | <b>RNF166</b>  | 115992 ring finger protein 166                                                                                                                     | -2.95  | 0.06 |
| 229932_at    | <b>RNF181</b>  | 51255 Ring finger protein 181                                                                                                                      | 34.37  | 0.13 |
| 224750_at    | <b>RNF185</b>  | 91445 ring finger protein 185                                                                                                                      | 3.14   | 0.13 |
| 225931_s_at  | <b>RNF213</b>  | 57674 ring finger protein 213                                                                                                                      | 2.24   | 0.00 |
| 234461_at    | <b>RNF215</b>  | 200312 ring finger protein 215                                                                                                                     | 2.22   | 0.00 |
| 210706_s_at  | <b>RNF24</b>   | 11237 ring finger protein 24                                                                                                                       | -4.04  | 0.00 |
| 218528_s_at  | <b>RNF38</b>   | 152006 ring finger protein 38                                                                                                                      | -3.74  | 0.10 |
| 203286_at    | <b>RNF44</b>   | 22838 ring finger protein 44                                                                                                                       | -4.33  | 0.00 |
| 211387_x_at  | <b>RNGTT</b>   | 8732 RNA guanylyltransferase and 5'-phosphatase                                                                                                    | 6.18   | 0.10 |

|             |                          |                                                                                                               |        |      |
|-------------|--------------------------|---------------------------------------------------------------------------------------------------------------|--------|------|
| 202683_s_at | <b>RNMT</b>              | 8731 RNA (guanine-7-) methyltransferase                                                                       | 4.60   | 0.37 |
| 226975_at   | <b>RNPC3</b>             | 55599 RNA-binding region (RNP1, RRM) containing 3                                                             | -2.09  | 0.13 |
| 218301_at   | <b>RNPEPL1</b>           | 57140 arginyl aminopeptidase (aminopeptidase B)-like 1<br>Rho-associated, coiled-coil containing protein      | -9.04  | 0.06 |
| 202762_at   | <b>ROCK2</b>             | 9475 kinase 2                                                                                                 | -2.54  | 0.37 |
| 214697_s_at | <b>ROD1</b>              | 9991 ROD1 regulator of differentiation 1 (S. pombe)                                                           | -2.05  | 0.00 |
| 223609_at   | <b>ROPN1L</b>            | 83853 ropporin 1-like                                                                                         | -7.62  | 0.06 |
| 220436_at   | <b>RP11-138L21.1</b>     | 389722 similar to cell recognition molecule CASPR3                                                            | -9.01  | 0.58 |
| 1559884_at  | <b>RP11-145E5.4</b>      | 1E+08 antisense noncoding RNA in the INK4 locus                                                               | 2.72   | 0.37 |
| 1569932_at  | <b>RP11-262D11.5</b>     | 340527 similar to Nance-Horan syndrome protein                                                                | -4.20  | 0.22 |
| 214748_at   | <b>RP4-298P3.3</b>       | 88523 CG016                                                                                                   | 3.67   | 0.06 |
| 1553299_at  | <b>RP5-621O15.2</b>      | 200107 hypothetical protein FLJ31401                                                                          | 2.53   | 0.37 |
| 224835_at   | <b>RP6-1022P6.2</b>      | 56261 hypothetical protein KIAA1434<br>retinitis pigmentosa GTPase regulator interacting                      | -3.90  | 0.13 |
| 206608_s_at | <b>RPGRIP1</b>           | 57096 protein 1<br>ribose 5-phosphate isomerase A (ribose 5-                                                  | -2.27  | 0.37 |
| 212973_at   | <b>RPIA</b>              | 22934 phosphate epimerase)                                                                                    | -2.76  | 0.58 |
| 241703_at   | <b>RPIB9</b>             | 154661 Rap2-binding protein 9                                                                                 | 2.50   | 0.10 |
| 221989_at   | <b>RPL10</b>             | 6134 ribosomal protein L10                                                                                    | 2.34   | 0.22 |
| 215224_at   | <b>RPL23</b>             | 9349 ribosomal protein L23                                                                                    | 2.37   | 0.06 |
| 200013_at   | <b>RPL24</b>             | 6152 ribosomal protein L24                                                                                    | 2.16   | 0.06 |
| 214143_x_at | <b>RPL24 /// SLC36A2</b> | 153201 /// ribosomal protein L24 /// solute carrier family 36<br>6152 (proton/amino acid symporter), member 2 | 2.04   | 0.06 |
| 226335_at   | <b>RPS6KA3</b>           | 6197 ribosomal protein S6 kinase, 90kDa, polypeptide 3                                                        | -4.32  | 0.06 |
| 204635_at   | <b>RPS6KA5</b>           | 9252 ribosomal protein S6 kinase, 90kDa, polypeptide 5                                                        | -8.99  | 0.10 |
| 204803_s_at | <b>RRAD</b>              | 6236 Ras-related associated with diabetes                                                                     | 2.44   | 0.00 |
| 218088_s_at | <b>RRAGC</b>             | 64121 Ras-related GTP binding C<br>Ribosome binding protein 1 homolog 180kDa                                  | 2.17   | 0.00 |
| 213495_s_at | <b>RRBP1</b>             | 6238 (dog)                                                                                                    | -2.75  | 0.37 |
| 223342_at   | <b>RRM2B</b>             | 50484 ribonucleotide reductase M2 B (TP53 inducible)<br>ribosomal RNA processing 12 homolog (S.               | -5.05  | 0.06 |
| 216913_s_at | <b>RRP12</b>             | 23223 cerevisiae)<br>radical S-adenosyl methionine domain containing                                          | -14.01 | 0.00 |
| 242625_at   | <b>RSAD2</b>             | 91543 2                                                                                                       | 10.89  | 0.00 |
| 213694_at   | <b>RSBN1</b>             | 54665 round spermatid basic protein 1                                                                         | -3.27  | 0.13 |
| 226387_at   | <b>RSBN1L</b>            | 222194 round spermatid basic protein 1-like                                                                   | -9.65  | 0.00 |
| 223713_at   | <b>RSPH3</b>             | 83861 radial spoke head 3 homolog (Chlamydomonas)                                                             | -3.01  | 0.22 |
| 201980_s_at | <b>RSU1</b>              | 6251 Ras suppressor protein 1                                                                                 | -6.88  | 0.22 |
| 219549_s_at | <b>RTN3</b>              | 10313 reticulon 3                                                                                             | -4.00  | 0.00 |
| 219684_at   | <b>RTP4</b>              | 64108 receptor (chemosensory) transporter protein 4                                                           | 6.49   | 0.58 |
| 232231_at   | <b>RUNX2</b>             | 860 runt-related transcription factor 2                                                                       | -12.57 | 0.10 |
| 204197_s_at | <b>RUNX3</b>             | 864 runt-related transcription factor 3                                                                       | 3.17   | 0.10 |
| 205087_at   | <b>RWDD3</b>             | 25950 RWD domain containing 3                                                                                 | -3.12  | 0.37 |
| 209148_at   | <b>RXRB</b>              | 6257 retinoid X receptor, beta                                                                                | -4.42  | 0.00 |
| 212440_at   | <b>RY1</b>               | 11017 putative nucleic acid binding protein RY-1                                                              | 2.21   | 0.10 |
| 203186_s_at | <b>S100A4</b>            | 6275 S100 calcium binding protein A4                                                                          | -13.18 | 0.00 |
| 217728_at   | <b>S100A6</b>            | 6277 S100 calcium binding protein A6                                                                          | -13.31 | 0.00 |
| 204351_at   | <b>S100P</b>             | 6286 S100 calcium binding protein P                                                                           | -2.74  | 0.00 |

|              |                 |                                                                                                    |        |      |
|--------------|-----------------|----------------------------------------------------------------------------------------------------|--------|------|
| 213635_s_at  | <b>SAFB</b>     | 6294 Scaffold attachment factor B                                                                  | 2.13   | 0.22 |
| 1553876_at   | <b>SAMD3</b>    | 154075 sterile alpha motif domain containing 3                                                     | 2.45   | 0.58 |
| 235643_at    | <b>SAMD9L</b>   | 219285 sterile alpha motif domain containing 9-like SAM domain, SH3 domain and nuclear             | 2.01   | 0.00 |
| 1555638_a_at | <b>SAMSN1</b>   | 64092 localization signals 1                                                                       | 13.56  | 0.00 |
| 219129_s_at  | <b>SAP30L</b>   | 79685 SAP30-like                                                                                   | -3.28  | 0.37 |
| 218254_s_at  | <b>SAR1B</b>    | 51128 SAR1 gene homolog B (S. cerevisiae) squamous cell carcinoma antigen recognized by T          | 4.00   | 0.03 |
| 200051_at    | <b>SART1</b>    | 9092 cells squamous cell carcinoma antigen recognized by T                                         | -2.01  | 0.22 |
| 200069_at    | <b>SART3</b>    | 9733 cells 3 Shwachman-Bodian-Diamond syndrome ///                                                 | 3.38   | 0.22 |
|              | <b>SBDS ///</b> | 155370 ///                                                                                         |        |      |
| 222669_s_at  | <b>SBDSP</b>    | 51119 pseudogene                                                                                   | 2.24   | 0.37 |
| 212417_at    | <b>SCAMP1</b>   | 9522 secretory carrier membrane protein 1                                                          | -2.73  | 0.37 |
| 212329_at    | <b>SCAP</b>     | 22937 SREBF chaperone                                                                              | -10.61 | 0.37 |
| 209741_x_at  | <b>SCAPER</b>   | 49855 S phase cyclin A-associated protein in the ER                                                | 2.83   | 0.58 |
| 1554705_at   | <b>SCARA5</b>   | 286133 scavenger receptor class A, member 5 (putative)                                             | 5.08   | 0.13 |
| 1555021_a_at | <b>SCARF1</b>   | 8578 scavenger receptor class F, member 1                                                          | 4.37   | 0.00 |
| 201826_s_at  | <b>SCCPDH</b>   | 51097 saccharopine dehydrogenase (putative)                                                        | 3.46   | 0.22 |
| 219196_at    | <b>SCG3</b>     | 29106 secretogranin III                                                                            | 8.27   | 0.03 |
| 1569495_at   | <b>SCLT1</b>    | 132320 sodium channel and clathrin linker 1                                                        | -8.32  | 0.13 |
| 205508_at    | <b>SCN1B</b>    | 6324 sodium channel, voltage-gated, type I, beta                                                   | 49.45  | 0.22 |
| 218217_at    | <b>SCPEP1</b>   | 59342 serine carboxypeptidase 1                                                                    | -2.50  | 0.37 |
| 212154_at    | <b>SDC2</b>     | 6383 syndecan 2                                                                                    | 5.55   | 0.58 |
| 202071_at    | <b>SDC4</b>     | 6385 syndecan 4                                                                                    | 4.96   | 0.06 |
| 1555539_at   | <b>SDS</b>      | 10993 serine dehydratase SEC22 vesicle trafficking protein homolog B (S.                           | 2.05   | 0.13 |
| 214257_s_at  | <b>SEC22B</b>   | 9554 cerevisiae)                                                                                   | 2.42   | 0.00 |
| 210293_s_at  | <b>SEC23B</b>   | 10483 Sec23 homolog B (S. cerevisiae) SEC24 related gene family, member A (S.                      | 5.99   | 0.03 |
| 212900_at    | <b>SEC24A</b>   | 10802 cerevisiae) SEC24 related gene family, member D (S.                                          | 7.55   | 0.22 |
| 202375_at    | <b>SEC24D</b>   | 9871 cerevisiae)                                                                                   | 2.42   | 0.13 |
| 200945_s_at  | <b>SEC31A</b>   | 22872 SEC31 homolog A (S. cerevisiae)                                                              | 3.81   | 0.37 |
| 217716_s_at  | <b>SEC61A1</b>  | 29927 Sec61 alpha 1 subunit (S. cerevisiae)                                                        | 2.84   | 0.37 |
| 203484_at    | <b>SEC61G</b>   | 23480 Sec61 gamma subunit                                                                          | 2.10   | 0.06 |
| 204563_at    | <b>SELL</b>     | 6402 selectin L (lymphocyte adhesion molecule 1)                                                   | -8.05  | 0.00 |
| 209879_at    | <b>SELPLG</b>   | 6404 selectin P ligand                                                                             | -13.45 | 0.00 |
| 223209_s_at  | <b>SELS</b>     | 55829 selenoprotein S sema domain, immunoglobulin domain (Ig), transmembrane domain (TM) and short | 5.18   | 0.00 |
| 234725_s_at  | <b>SEMA4B</b>   | 10509 cytoplasmic domain, (semaphorin) 4B sema domain, transmembrane domain (TM), and              | -2.03  | 0.13 |
| 223449_at    | <b>SEMA6A</b>   | 57556 cytoplasmic domain, (semaphorin) 6A                                                          | 9.84   | 0.13 |
| 57703_at     | <b>SENP5</b>    | 205564 SUMO1/sentrin specific peptidase 5                                                          | 2.19   | 0.37 |
| 202318_s_at  | <b>SENP6</b>    | 26054 SUMO1/sentrin specific peptidase 6                                                           | -2.90  | 0.00 |
| 220735_s_at  | <b>SENP7</b>    | 57337 SUMO1/sentrin specific peptidase 7                                                           | -3.10  | 0.37 |
| 213151_s_at  | <b>SEPT7</b>    | 989 septin 7                                                                                       | -2.12  | 0.10 |
| 208657_s_at  | <b>SEPT9</b>    | 10801 septin 9 serpin peptidase inhibitor, clade A (alpha-1                                        | -2.39  | 0.13 |
| 208531_at    | <b>SERPINA2</b> | 390502 antiproteinase, antitrypsin), member 2 serpin peptidase inhibitor, clade B (ovalbumin),     | 2.60   | 0.58 |
| 206034_at    | <b>SERPINB8</b> | 5271 member 8 serpin peptidase inhibitor, clade B (ovalbumin),                                     | 6.92   | 0.00 |
| 209723_at    | <b>SERPINB9</b> | 5272 member 9                                                                                      | 9.16   | 0.00 |



|             |                  |                                                                                                 |        |      |
|-------------|------------------|-------------------------------------------------------------------------------------------------|--------|------|
|             |                  | serpin peptidase inhibitor, clade G (C1 inhibitor),                                             |        |      |
| 200986_at   | <b>SERPING1</b>  | 710 member 1, (angioedema, hereditary)                                                          | 2.22   | 0.58 |
| 202656_s_at | <b>SERTAD2</b>   | 9792 SERTA domain containing 2                                                                  | -2.33  | 0.10 |
| 235684_s_at | <b>SESN3</b>     | 143686 sestrin 3                                                                                | -5.99  | 0.00 |
| 213153_at   | <b>SETD1B</b>    | 23067 SET domain containing 1B                                                                  | -2.80  | 0.00 |
| 235339_at   | <b>SETDB2</b>    | 83852 SET domain, bifurcated 2                                                                  | 3.44   | 0.00 |
| 232229_at   | <b>SETX</b>      | 23064 senataxin                                                                                 | -2.32  | 0.22 |
| 240709_at   | <b>SEZ6L</b>     | 23544 seizure related 6 homolog (mouse)-like                                                    | 3.24   | 0.00 |
| 227210_at   | <b>SFMBT2</b>    | 57713 Scm-like with four mbt domains 2<br>splicing factor, arginine/serine-rich 10 (transformer | 16.81  | 0.00 |
| 200893_at   | <b>SFRS10</b>    | 6434 2 homolog, Drosophila)                                                                     | 2.91   | 0.13 |
| 214092_x_at | <b>SFRS14</b>    | 10147 splicing factor, arginine/serine-rich 14                                                  | -2.11  | 0.58 |
| 225849_s_at | <b>SFT2D1</b>    | 113402 SFT2 domain containing 1                                                                 | 2.01   | 0.00 |
| 214354_x_at | <b>SFTPB</b>     | 6439 surfactant, pulmonary-associated protein B                                                 | 7.89   | 0.00 |
| 238567_at   | <b>SGPP2</b>     | 130367 sphingosine-1-phosphate phosphatase 2<br>small glutamine-rich tetratricopeptide repeat   | 166.20 | 0.00 |
| 232084_at   | <b>SGTB</b>      | 54557 (TPR)-containing, beta                                                                    | 12.06  | 0.00 |
| 222169_x_at | <b>SH2D3A</b>    | 10045 SH2 domain containing 3A<br>SH3 domain binding glutamic acid-rich protein like            | 2.72   | 0.10 |
| 221269_s_at | <b>SH3BGL3</b>   | 83442 3                                                                                         | -2.56  | 0.03 |
| 223265_at   | <b>SH3BP5L</b>   | 80851 SH3-binding domain protein 5-like                                                         | -4.91  | 0.37 |
| 1567027_at  | <b>SH3GLP2</b>   | 6459 SH3-domain GRB2-like pseudogene 2                                                          | 2.02   | 0.13 |
| 223082_at   | <b>SH3KBP1</b>   | 30011 SH3-domain kinase binding protein 1                                                       | -2.80  | 0.03 |
| 209980_s_at | <b>SHMT1</b>     | 6470 serine hydroxymethyltransferase 1 (soluble)                                                | 2.23   | 0.03 |
| 218765_at   | <b>SIDT2</b>     | 51092 SID1 transmembrane family, member 2                                                       | -2.95  | 0.22 |
| 225056_at   | <b>SIPA1L2</b>   | 57568 signal-induced proliferation-associated 1 like 2                                          | -2.14  | 0.37 |
| 206934_at   | <b>SIRPB1</b>    | 10326 signal-regulatory protein beta 1                                                          | -3.90  | 0.00 |
| 1559034_at  | <b>SIRPB2</b>    | 284759 signal-regulatory protein beta 2                                                         | -6.68  | 0.06 |
| 232891_at   | <b>SIRPD</b>     | 128646 signal-regulatory protein delta                                                          | -3.49  | 0.37 |
| 204362_at   | <b>SKAP2</b>     | 8935 src kinase associated phosphoprotein 2                                                     | -2.19  | 0.00 |
| 229265_at   | <b>SKI</b>       | 6497 v-ski sarcoma viral oncogene homolog (avian)                                               | -2.67  | 0.10 |
| 232379_at   | <b>SKIL</b>      | 6498 SKI-like oncogene<br>signaling lymphocytic activation molecule family                      | 9.75   | 0.00 |
| 206181_at   | <b>SLAMF1</b>    | 6504 member 1                                                                                   | 29.31  | 0.37 |
| 219159_s_at | <b>SLAMF7</b>    | 57823 SLAM family member 7                                                                      | 82.45  | 0.00 |
| 206052_s_at | <b>SLBP</b>      | 7884 stem-loop (histone) binding protein                                                        | -5.82  | 0.58 |
| 203124_s_at | <b>SLC11A2</b>   | 4891 metal ion transporters), member 2<br>solute carrier family 11 (proton-coupled divalent     | 103.70 | 0.00 |
| 220371_s_at | <b>SLC12A9</b>   | 56996 transporters), member 9                                                                   | -19.47 | 0.00 |
| 225057_at   | <b>SLC15A4</b>   | 121260 solute carrier family 15, member 4<br>solute carrier family 16, member 10 (aromatic      | -2.87  | 0.00 |
| 222939_s_at | <b>SLC16A10</b>  | 117247 amino acid transporter)                                                                  | 76.87  | 0.58 |
| 206600_s_at | <b>SLC16A5</b>   | 9121 (monocarboxylic acid transporter 6)<br>solute carrier family 16, member 6                  | -2.68  | 0.13 |
| 207038_at   | <b>SLC16A6</b>   | 9120 (monocarboxylic acid transporter 7)<br>solute carrier family 19 (folate transporter),      | -2.40  | 0.13 |
| 211576_s_at | <b>SLC19A1</b>   | 6573 member 1<br>solute carrier family 1 (glutamate/neutral amino                               | -8.61  | 0.10 |
| 212811_x_at | <b>SLC1A4</b>    | 6509 acid transporter), member 4<br>solute carrier family 22 (organic cation                    | 3.60   | 0.58 |
| 228497_at   | <b>SLC22A15</b>  | 55356 transporter), member 15                                                                   | -3.79  | 0.58 |
| 206097_at   | <b>SLC22A18A</b> | solute carrier family 22 (organic cation                                                        |        |      |
|             | <b>S</b>         | 5003 transporter), member 18 antisense                                                          | 4.86   | 0.22 |
| 205896_at   | <b>SLC22A4</b>   | solute carrier family 22 (organic cation<br>transporter), member 4                              | -5.11  | 0.37 |

|              |                 |                                                                                                         |        |      |
|--------------|-----------------|---------------------------------------------------------------------------------------------------------|--------|------|
| 211842_s_at  | <b>SLC24A1</b>  | 9187 1<br>solute carrier family 24<br>(sodium/potassium/calcium exchanger), member                      | 18.18  | 0.37 |
| 243969_at    | <b>SLC24A4</b>  | 123041 4<br>solute carrier family 24<br>(sodium/potassium/calcium exchanger), member                    | -11.74 | 0.37 |
| 203775_at    | <b>SLC25A13</b> | 10165 solute carrier family 25, member 13 (citrin)                                                      | 49.24  | 0.00 |
| 242335_at    | <b>SLC25A37</b> | 51312 solute carrier family 25, member 37                                                               | -2.02  | 0.00 |
| 226679_at    | <b>SLC26A11</b> | 284129 solute carrier family 26, member 11<br>solute carrier family 29 (nucleoside transporters),       | 6.56   | 0.37 |
| 201802_at    | <b>SLC29A1</b>  | 2030 member 1                                                                                           | -5.64  | 0.13 |
| 1555500_s_at | <b>SLC2A4RG</b> | 56731 SLC2A4 regulator<br>solute carrier family 2 (facilitated glucose                                  | 5.77   | 0.10 |
| 220091_at    | <b>SLC2A6</b>   | 11182 transporter), member 6<br>solute carrier family 30 (zinc transporter), member                     | 6.41   | 0.22 |
| 207035_at    | <b>SLC30A3</b>  | 7781 3<br>solute carrier family 30 (zinc transporter), member                                           | -5.25  | 0.13 |
| 207362_at    | <b>SLC30A4</b>  | 7782 4<br>solute carrier family 35 (UDP-galactose                                                       | 19.15  | 0.00 |
| 209326_at    | <b>SLC35A2</b>  | 7355 transporter), member A2                                                                            | 3.89   | 0.00 |
| 224716_at    | <b>SLC35B2</b>  | 347734 solute carrier family 35, member B2<br>solute carrier family 37 (glycerol-3-phosphate            | 9.61   | 0.00 |
| 223304_at    | <b>SLC37A3</b>  | 84255 transporter), member 3<br>solute carrier family 39 (zinc transporter), member                     | -11.91 | 0.00 |
| 217778_at    | <b>SLC39A1</b>  | 27173 1<br>solute carrier family 39 (zinc transporter), member                                          | 3.13   | 0.58 |
| 1553126_a_at | <b>SLC39A12</b> | 221074 12<br>solute carrier family 39 (zinc transporter), member                                        | 2.10   | 0.22 |
| 209267_s_at  | <b>SLC39A8</b>  | 64116 8<br>solute carrier family 3 (activators of dibasic and                                           | 91.85  | 0.00 |
| 200924_s_at  | <b>SLC3A2</b>   | 6520 neutral amino acid transport), member 2<br>solute carrier family 40 (iron-regulated                | 3.74   | 0.22 |
| 223044_at    | <b>SLC40A1</b>  | 30061 transporter), member 1                                                                            | -21.13 | 0.00 |
| 223798_at    | <b>SLC41A2</b>  | 84102 solute carrier family 41, member 2                                                                | 13.64  | 0.58 |
| 210692_s_at  | <b>SLC43A3</b>  | 29015 solute carrier family 43, member 3                                                                | 190.79 | 0.00 |
| 225175_s_at  | <b>SLC44A2</b>  | 57153 solute carrier family 44, member 2                                                                | -27.44 | 0.00 |
| 225598_at    | <b>SLC45A4</b>  | 57210 solute carrier family 45, member 4                                                                | -6.29  | 0.03 |
| 202111_at    | <b>SLC4A2</b>   | solute carrier family 4, anion exchanger, member<br>6522 2 (erythrocyte membrane protein band 3-like 1) | 6.60   | 0.58 |
| 202219_at    | <b>SLC6A8</b>   | solute carrier family 6 (neurotransmitter<br>6535 transporter, creatine), member 8                      | -5.24  | 0.58 |
| 209921_at    | <b>SLC7A11</b>  | solute carrier family 7, (cationic amino acid<br>23657 transporter, y+ system) member 11                | 16.56  | 0.00 |
| 204588_s_at  | <b>SLC7A7</b>   | solute carrier family 7 (cationic amino acid<br>9056 transporter, y+ system), member 7                  | 7.09   | 0.00 |
| 235518_at    | <b>SLC8A1</b>   | solute carrier family 8 (sodium/calcium<br>6546 exchanger), member 1                                    | -2.84  | 0.37 |
| 201349_at    | <b>SLC9A3R1</b> | solute carrier family 9 (sodium/hydrogen<br>9368 exchanger), member 3 regulator 1                       | -6.29  | 0.22 |
| 227367_at    | <b>SLCO3A1</b>  | solute carrier organic anion transporter family,<br>28232 member 3A1                                    | -5.31  | 0.22 |
| 219911_s_at  | <b>SLCO4A1</b>  | solute carrier organic anion transporter family,<br>28231 member 4A1                                    | 47.74  | 0.00 |
| 222071_s_at  | <b>SLCO4C1</b>  | solute carrier organic anion transporter family,<br>353189 member 4C1                                   | -8.45  | 0.03 |
| 226743_at    | <b>SLFN11</b>   | 91607 schlafen family member 11                                                                         | 2.42   | 0.13 |
| 1553055_a_at | <b>SLFN5</b>    | 162394 schlafen family member 5                                                                         | 34.78  | 0.00 |
| 225243_s_at  | <b>SLMAP</b>    | 7871 sarcolemma associated protein                                                                      | -3.45  | 0.03 |
| 203021_at    | <b>SLPI</b>     | 6590 secretory leukocyte peptidase inhibitor                                                            | 4.66   | 0.00 |

|              |                 |           |                                                                                                                                           |        |      |
|--------------|-----------------|-----------|-------------------------------------------------------------------------------------------------------------------------------------------|--------|------|
| 238446_at    | <b>SMA4</b>     | 11039     | Glucuronidase, beta pseudogene                                                                                                            | -3.14  | 0.22 |
|              | <b>SMA4 ///</b> | 11039 /// |                                                                                                                                           |        |      |
| 215043_s_at  | <b>SMA5</b>     | 11042     | glucuronidase, beta pseudogene                                                                                                            | -3.23  | 0.10 |
| 218284_at    | <b>SMAD3</b>    | 4088      | SMAD family member 3                                                                                                                      | 15.29  | 0.00 |
| 1565703_at   | <b>SMAD4</b>    | 4089      | SMAD family member 4                                                                                                                      | -3.76  | 0.13 |
| 225282_at    | <b>SMAP1L</b>   | 64744     | stromal membrane-associated protein 1-like<br>SWI/SNF related, matrix associated, actin<br>dependent regulator of chromatin, subfamily a, | -4.15  | 0.00 |
| 206542_s_at  | <b>SMARCA2</b>  | 6595      | member 2<br>SWI/SNF related, matrix associated, actin<br>dependent regulator of chromatin, subfamily c,                                   | -6.95  | 0.00 |
| 201075_s_at  | <b>SMARCC1</b>  | 6599      | member 1<br>SWI/SNF related, matrix associated, actin<br>dependent regulator of chromatin, subfamily d,                                   | -4.30  | 0.03 |
| 201827_at    | <b>SMARCD2</b>  | 6603      | member 2                                                                                                                                  | -2.71  | 0.03 |
| 201589_at    | <b>SMC1A</b>    | 8243      | structural maintenance of chromosomes 1A                                                                                                  | -2.37  | 0.13 |
| 209258_s_at  | <b>SMC3</b>     | 9126      | structural maintenance of chromosomes 3<br>structural maintenance of chromosomes flexible                                                 | -2.39  | 0.13 |
| 212569_at    | <b>SMCHD1</b>   | 23347     | hinge domain containing 1<br>Smith-Magenis syndrome chromosome region,                                                                    | -2.35  | 0.00 |
| 235896_s_at  | <b>SMCR7</b>    | 125170    | candidate 7<br>Smith-Magenis syndrome chromosome region,                                                                                  | -2.16  | 0.00 |
| 1557986_s_at | <b>SMCR8</b>    | 140775    | candidate 8<br>sphingomyelin phosphodiesterase 2, neutral                                                                                 | 2.27   | 0.37 |
| 205622_at    | <b>SMPD2</b>    | 6610      | membrane (neutral sphingomyelinase)                                                                                                       | 2.15   | 0.03 |
| 213624_at    | <b>SMPDL3A</b>  | 10924     | sphingomyelin phosphodiesterase, acid-like 3A                                                                                             | 7.37   | 0.22 |
| 205596_s_at  | <b>SMURF2</b>   | 64750     | SMAD specific E3 ubiquitin protein ligase 2                                                                                               | -2.56  | 0.37 |
| 226683_at    | <b>SNAG1</b>    | 112574    | Sorting nexin associated golgi protein 1<br>small nuclear RNA activating complex,                                                         | -2.58  | 0.03 |
| 205443_at    | <b>SNAPC1</b>   | 6617      | polypeptide 1, 43kDa<br>staphylococcal nuclease and tudor domain                                                                          | 16.67  | 0.00 |
| 201622_at    | <b>SND1</b>     | 27044     | containing 1<br>SNF8, ESCRT-II complex subunit, homolog (S.                                                                               | 6.02   | 0.22 |
| 242790_at    | <b>SNF8</b>     | 11267     | cerevisiae)<br>small nucleolar RNA host gene (non-protein                                                                                 | 3.01   | 0.58 |
| 1564906_at   | <b>SNHG4</b>    | 724102    | coding) 4                                                                                                                                 | 3.39   | 0.13 |
| 209481_at    | <b>SNRK</b>     | 54861     | SNF related kinase<br>small nuclear ribonucleoprotein 70kDa                                                                               | -2.11  | 0.03 |
| 201221_s_at  | <b>SNRP70</b>   | 6625      | polypeptide (RNP antigen)<br>small nuclear ribonucleoprotein D1 polypeptide                                                               | -2.19  | 0.10 |
| 202690_s_at  | <b>SNRPD1</b>   | 6632      | 16kDa                                                                                                                                     | 2.77   | 0.22 |
| 207438_s_at  | <b>SNUPN</b>    | 10073     | snurportin 1                                                                                                                              | -3.64  | 0.37 |
| 214531_s_at  | <b>SNX1</b>     | 6642      | sorting nexin 1<br>sterol O-acyltransferase (acyl-Coenzyme A:                                                                             | -2.59  | 0.22 |
| 244661_at    | <b>SOAT1</b>    | 6646      | cholesterol acyltransferase) 1                                                                                                            | -4.01  | 0.03 |
| 210677_at    | <b>SOAT2</b>    | 8435      | sterol O-acyltransferase 2                                                                                                                | 2.14   | 0.06 |
| 213337_s_at  | <b>SOCS1</b>    | 8651      | suppressor of cytokine signaling 1                                                                                                        | 11.64  | 0.06 |
| 206359_at    | <b>SOCS3</b>    | 9021      | suppressor of cytokine signaling 3                                                                                                        | 3.77   | 0.00 |
| 215078_at    | <b>SOD2</b>     | 6648      | superoxide dismutase 2, mitochondrial                                                                                                     | 2.77   | 0.00 |
| 201563_at    | <b>SORD</b>     | 6652      | sorbitol dehydrogenase<br>sortilin-related receptor, L(DLR class) A repeats-                                                              | -7.46  | 0.00 |
| 230707_at    | <b>SORL1</b>    | 6653      | containing                                                                                                                                | -16.65 | 0.00 |
| 217644_s_at  | <b>SOS2</b>     | 6655      | son of sevenless homolog 2 (Drosophila)                                                                                                   | -7.53  | 0.00 |
| 213721_at    | <b>SOX2</b>     | 6657      | SRY (sex determining region Y)-box 2                                                                                                      | 2.36   | 0.58 |
| 1563454_at   | <b>SOX6</b>     | 55553     | SRY (sex determining region Y)-box 6                                                                                                      | 2.09   | 0.10 |
| 224760_at    | <b>SP1</b>      | 6667      | Sp1 transcription factor                                                                                                                  | -4.13  | 0.00 |
| 207777_s_at  | <b>SP140</b>    | 11262     | SP140 nuclear body protein                                                                                                                | 3.54   | 0.03 |
| 1553579_a_at | <b>SPAG11B</b>  | 10407     | sperm associated antigen 11B                                                                                                              | 2.11   | 0.58 |

|              |                  |                                                          |        |      |
|--------------|------------------|----------------------------------------------------------|--------|------|
| 212470_at    | <b>SPAG9</b>     | 9043 sperm associated antigen 9                          | 2.40   | 0.00 |
| 221057_at    | <b>SPATA1</b>    | 64173 spermatogenesis associated 1                       | -3.30  | 0.13 |
| 1556601_a_at | <b>SPATA13</b>   | 221178 Spermatogenesis associated 13                     | -2.58  | 0.37 |
| 218164_at    | <b>SPATA20</b>   | 64847 spermatogenesis associated 20                      | 2.39   | 0.06 |
|              |                  | signal peptidase complex subunit 2 homolog (S.           |        |      |
| 201240_s_at  | <b>SPCS2</b>     | 9789 cerevisiae)                                         | 2.09   | 0.00 |
|              |                  | sperm antigen with calponin homology and coiled-         |        |      |
| 244461_at    | <b>SPECC1</b>    | 92521 coil domains 1                                     | -7.40  | 0.00 |
|              |                  | spen homolog, transcriptional regulator                  |        |      |
| 201997_s_at  | <b>SPEN</b>      | 23013 (Drosophila)                                       | -4.01  | 0.58 |
| 212526_at    | <b>SPG20</b>     | 23111 spastic paraplegia 20 (Troyer syndrome)            | 5.17   | 0.00 |
| 219257_s_at  | <b>SPHK1</b>     | 8877 sphingosine kinase 1                                | 45.36  | 0.00 |
| 206239_s_at  | <b>SPINK1</b>    | 6690 serine peptidase inhibitor, Kazal type 1            | 33.11  | 0.22 |
|              |                  | serine peptidase inhibitor-like, with Kunitz and         |        |      |
| 206318_at    | <b>SPINLW1</b>   | 57119 WAP domains 1 (eppin)                              | 3.39   | 0.03 |
| 202826_at    | <b>SPINT1</b>    | 6692 serine peptidase inhibitor, Kunitz type 1           | -2.27  | 0.06 |
| 210715_s_at  | <b>SPINT2</b>    | 10653 serine peptidase inhibitor, Kunitz type, 2         | 4.21   | 0.00 |
|              |                  | secreted phosphoprotein 1 (osteopontin, bone             |        |      |
| 209875_s_at  | <b>SPP1</b>      | 6696 sialoprotein I, early T-lymphocyte activation 1)    | 8.93   | 0.00 |
| 226353_at    | <b>SPPL2A</b>    | 84888 signal peptide peptidase-like 2A                   | 3.66   | 0.00 |
|              |                  | spIA/ryanodine receptor domain and SOCS box              |        |      |
| 46256_at     | <b>SPSB3</b>     | 90864 containing 3                                       | -2.32  | 0.03 |
|              |                  | serine palmitoyltransferase, long chain base             |        |      |
| 203128_at    | <b>SPTLC2</b>    | 9517 subunit 2                                           | -9.47  | 0.03 |
| 244804_at    | <b>SQSTM1</b>    | 8878 Sequestosome 1                                      | 11.37  | 0.00 |
|              |                  | v-src sarcoma (Schmidt-Ruppin A-2) viral                 |        |      |
| 213324_at    | <b>SRC</b>       | 6714 oncogene homolog (avian)                            | 21.64  | 0.03 |
| 208095_s_at  | <b>SRP72</b>     | 6731 signal recognition particle 72kDa                   | 4.45   | 0.58 |
| 202200_s_at  | <b>SRPK1</b>     | 6732 SFRS protein kinase 1                               | -4.04  | 0.00 |
| 1558254_s_at | <b>SRPK2</b>     | 6733 SFRS protein kinase 2                               | -14.59 | 0.00 |
| 202591_s_at  | <b>SSBP1</b>     | 6742 single-stranded DNA binding protein 1               | 2.30   | 0.58 |
| 210829_s_at  | <b>SSBP2</b>     | 23635 single-stranded DNA binding protein 2              | -6.95  | 0.37 |
| 221752_at    | <b>SSH1</b>      | 54434 Slingshot homolog 1 (Drosophila)                   | -3.80  | 0.22 |
| 226080_at    | <b>SSH2</b>      | 85464 slingshot homolog 2 (Drosophila)                   | -5.75  | 0.00 |
|              |                  | signal sequence receptor, beta (translocon-              |        |      |
| 200652_at    | <b>SSR2</b>      | 6746 associated protein beta)                            | 2.27   | 0.03 |
|              |                  | suppression of tumorigenicity 13 (colon                  |        |      |
| 208666_s_at  | <b>ST13</b>      | 6767 carcinoma) (Hsp70 interacting protein)              | 2.37   | 0.13 |
| 203759_at    | <b>ST3GAL4</b>   | 6484 ST3 beta-galactoside alpha-2,3-sialyltransferase 4  | -4.03  | 0.37 |
|              |                  | ST6 (alpha-N-acetyl-neuraminyl-2,3-beta-                 |        |      |
|              | <b>ST6GALNAC</b> | galactosyl-1,3)-N-acetylgalactosaminide alpha-2,6-       |        |      |
| 204542_at    | <b>2</b>         | 10610 sialyltransferase 2                                | -9.97  | 0.00 |
| 1559208_at   | <b>ST7OT4</b>    | 338069 ST7 overlapping transcript 4 (non-coding RNA)     | 2.01   | 0.58 |
|              |                  | ST8 alpha-N-acetyl-neuraminide alpha-2,8-                |        |      |
| 206925_at    | <b>ST8SIA4</b>   | 7903 sialyltransferase 4                                 | -3.67  | 0.00 |
|              |                  | StAR-related lipid transfer (START) domain               |        |      |
| 213820_s_at  | <b>STARD5</b>    | 80765 containing 5                                       | -9.67  | 0.22 |
|              |                  | signal transducer and activator of transcription 2,      |        |      |
| 225636_at    | <b>STAT2</b>     | 6773 113kDa                                              | 2.33   | 0.00 |
| 206118_at    | <b>STAT4</b>     | 6775 signal transducer and activator of transcription 4  | 23.98  | 0.06 |
| 212549_at    | <b>STAT5B</b>    | 6777 signal transducer and activator of transcription 5B | -2.73  | 0.00 |
|              |                  | signal transducer and activator of transcription 6,      |        |      |
| 201331_s_at  | <b>STAT6</b>     | 6778 interleukin-4 induced                               | -3.26  | 0.00 |
|              |                  | stress 70 protein chaperone, microsome-                  |        |      |
| 202557_at    | <b>STCH</b>      | 6782 associated, 60kDa                                   | 23.47  | 0.00 |
| 225987_at    | <b>STEAP4</b>    | 79689 STEAP family member 4                              | -2.22  | 0.00 |

|              |                  |                                                                                                         |        |      |
|--------------|------------------|---------------------------------------------------------------------------------------------------------|--------|------|
| 228394_at    | <b>STK10</b>     | 6793 serine/threonine kinase 10                                                                         | -2.59  | 0.22 |
| 209622_at    | <b>STK16</b>     | 8576 serine/threonine kinase 16                                                                         | -2.71  | 0.37 |
| 205214_at    | <b>STK17B</b>    | 9262 serine/threonine kinase 17b<br>serine/threonine kinase 24 (STE20 homolog,                          | -3.72  | 0.22 |
| 208855_s_at  | <b>STK24</b>     | 8428 yeast)                                                                                             | -2.33  | 0.00 |
| 212572_at    | <b>STK38L</b>    | 23012 serine/threonine kinase 38 like                                                                   | -5.45  | 0.10 |
| 201061_s_at  | <b>STOM</b>      | 2040 stomatin                                                                                           | 4.96   | 0.00 |
| 205520_at    | <b>STRN</b>      | 6801 striatin, calmodulin binding protein<br>STT3, subunit of the oligosaccharyltransferase             | -6.31  | 0.00 |
| 202223_at    | <b>STT3A</b>     | 3703 complex, homolog A ( <i>S. cerevisiae</i> )                                                        | 4.15   | 0.22 |
| 212625_at    | <b>STX10</b>     | 8677 syntaxin 10                                                                                        | -5.81  | 0.37 |
| 221500_s_at  | <b>STX16</b>     | 8675 syntaxin 16                                                                                        | -2.07  | 0.03 |
| 203530_s_at  | <b>STX4</b>      | 6810 syntaxin 4                                                                                         | 3.10   | 0.00 |
| 203310_at    | <b>STXBP3</b>    | 6814 syntaxin binding protein 3                                                                         | -2.56  | 0.10 |
| 217874_at    | <b>SUCLG1</b>    | 8802 succinate-CoA ligase, GDP-forming, alpha subunit                                                   | -3.85  | 0.13 |
| 224724_at    | <b>SULF2</b>     | 55959 sulfatase 2<br>sulfotransferase family, cytosolic, 1A, phenol-                                    | -7.83  | 0.03 |
| 203615_x_at  | <b>SULT1A1</b>   | 6817 preferring, member 1<br>sulfotransferase family, cytosolic, 1A, phenol-                            | -4.53  | 0.06 |
| 207122_x_at  | <b>SULT1A2</b>   | 6799 preferring, member 2                                                                               | -4.34  | 0.22 |
| 207601_at    | <b>SULT1B1</b>   | 27284 sulfotransferase family, cytosolic, 1B, member 1                                                  | -8.06  | 0.22 |
| 226850_at    | <b>SUMF1</b>     | 285362 sulfatase modifying factor 1                                                                     | -4.43  | 0.03 |
| 222979_s_at  | <b>SURF4</b>     | 6836 surfeit 4<br>suppressor of variegation 4-20 homolog 1                                              | 3.10   | 0.10 |
| 222759_at    | <b>SUV420H1</b>  | 51111 ( <i>Drosophila</i> )                                                                             | -2.74  | 0.13 |
| 209307_at    | <b>SWAP70</b>    | 23075 SWAP-70 protein                                                                                   | 2.02   | 0.06 |
| 226068_at    | <b>SYK</b>       | 6850 spleen tyrosine kinase                                                                             | -2.98  | 0.00 |
| 1558392_at   | <b>SYNE2</b>     | 23224 spectrin repeat containing, nuclear envelope 2                                                    | -7.19  | 0.06 |
| 212828_at    | <b>SYNJ2</b>     | 8871 synaptojanin 2                                                                                     | 8.72   | 0.22 |
| 243313_at    | <b>SYNPO2L</b>   | 79933 synaptopodin 2-like<br>SYS1 Golgi-localized integral membrane protein                             | 2.52   | 0.13 |
| 224669_at    | <b>SYS1</b>      | 90196 homolog ( <i>S. cerevisiae</i> )                                                                  | 2.34   | 0.58 |
| 1560879_a_at | <b>SYT15</b>     | 83849 synaptotagmin XV                                                                                  | 2.02   | 0.37 |
| 238423_at    | <b>SYTL3</b>     | 94120 synaptotagmin-like 3<br>transforming, acidic coiled-coil containing protein                       | -2.61  | 0.58 |
| 217437_s_at  | <b>TACC1</b>     | 6867 1<br>transforming, acidic coiled-coil containing protein                                           | -2.25  | 0.13 |
| 218308_at    | <b>TACC3</b>     | 10460 3                                                                                                 | -20.99 | 0.00 |
| 235135_at    | <b>TAF10</b>     | 6881 TAF10 RNA polymerase II, TATA box binding<br>protein (TBP)-associated factor, 30kDa                | -2.31  | 0.06 |
| 205966_at    | <b>TAF13</b>     | 6884 TAF13 RNA polymerase II, TATA box binding<br>protein (TBP)-associated factor, 18kDa                | 2.85   | 0.03 |
| 203893_at    | <b>TAF9</b>      | 6880 TAF9 RNA polymerase II, TATA box binding<br>protein (TBP)-associated factor, 32kDa                 | 5.93   | 0.00 |
| 221617_at    | <b>TAF9B</b>     | 51616 TAF9B RNA polymerase II, TATA box binding<br>protein (TBP)-associated factor, 31kDa               | 2.88   | 0.37 |
| 200916_at    | <b>TAGLN2</b>    | 8407 transgelin 2                                                                                       | -2.65  | 0.00 |
| 201463_s_at  | <b>TALDO1</b>    | 6888 transaldolase 1                                                                                    | -2.06  | 0.13 |
| 207616_s_at  | <b>TANK</b>      | 10010 TRAF family member-associated NFkB activator<br>transporter 2, ATP-binding cassette, sub-family B | 4.87   | 0.00 |
| 225973_at    | <b>TAP2</b>      | 6891 (MDR/TAP)<br>transmembrane anterior posterior transformation                                       | 2.05   | 0.13 |
| 227407_at    | <b>TAPT1</b>     | 202018 1                                                                                                | -2.80  | 0.37 |
|              | <b>TARP ///</b>  | 445347 ///<br>T cell receptor gamma constant 2 ///<br>T cell                                            |        |      |
|              | <b>TRGC2 ///</b> | 6967 ///<br>receptor gamma variable 9 ///<br>TCR gamma                                                  |        |      |
| 216920_s_at  | <b>TRGV9</b>     | 6983<br>alternate reading frame protein                                                                 | 25.76  | 0.00 |

|             |                   |                                                                                                                                                         |        |      |
|-------------|-------------------|---------------------------------------------------------------------------------------------------------------------------------------------------------|--------|------|
| 221397_at   | <b>TAS2R10</b>    | 50839 taste receptor, type 2, member 10                                                                                                                 | -2.09  | 0.58 |
| 1553556_at  | <b>TAS2R40</b>    | 259286 taste receptor, type 2, member 40                                                                                                                | -10.98 | 0.03 |
| 228867_at   | <b>TATDN3</b>     | 128387 TatD DNase domain containing 3                                                                                                                   | -4.72  | 0.58 |
| 203977_at   | <b>TAZ</b>        | 6901 tafazzin (cardiomyopathy, dilated 3A (X-linked);<br>endocardial fibroelastosis 2; Barth syndrome)<br>TBC1 (tre-2/USP6, BUB2, cdc16) domain family, | -2.47  | 0.37 |
| 1569566_at  | <b>TBC1D1</b>     | 23216 member 1                                                                                                                                          | -2.70  | 0.10 |
| 228258_at   | <b>TBC1D10C</b>   | 374403 TBC1 domain family, member 10C                                                                                                                   | -9.65  | 0.13 |
| 224622_at   | <b>TBC1D14</b>    | 57533 TBC1 domain family, member 14                                                                                                                     | -4.43  | 0.22 |
| 223461_at   | <b>TBC1D7</b>     | 51256 TBC1 domain family, member 7<br>TBC1 domain family, member 8B (with GRAM                                                                          | 7.91   | 0.03 |
| 1563272_at  | <b>TBC1D8B</b>    | 54885 domain)                                                                                                                                           | 3.05   | 0.58 |
| 201804_x_at | <b>TBCB</b>       | 1155 tubulin folding cofactor B                                                                                                                         | -2.14  | 0.58 |
| 218520_at   | <b>TBK1</b>       | 29110 TANK-binding kinase 1                                                                                                                             | 3.22   | 0.00 |
| 201868_s_at | <b>TBL1X</b>      | 6907 transducin (beta)-like 1X-linked                                                                                                                   | -3.79  | 0.00 |
| 207689_at   | <b>TBX10</b>      | 347853 T-box 10                                                                                                                                         | 3.34   | 0.37 |
| 229565_x_at | <b>TBX3</b>       | 6926 T-box 3 (ulnar mammary syndrome)<br>thromboxane A synthase 1 (platelet, cytochrome                                                                 | 2.54   | 0.37 |
| 208130_s_at | <b>TBXAS1</b>     | 6916 P450, family 5, subfamily A)                                                                                                                       | -4.73  | 0.03 |
| 213142_x_at | <b>tcag7.1314</b> | 54103 hypothetical protein LOC54103                                                                                                                     | 18.00  | 0.00 |
| 238678_at   | <b>tcag7.907</b>  | 402483 hypothetical LOC402483<br>transcription elongation factor B (SIII), polypeptide                                                                  | -8.32  | 0.03 |
| 200085_s_at | <b>TCEB2</b>      | 6923 2 (18kDa, elongin B)<br>transcription factor 7-like 2 (T-cell specific, HMG-                                                                       | -3.16  | 0.22 |
| 212761_at   | <b>TCF7L2</b>     | 6934 box)                                                                                                                                               | 3.83   | 0.58 |
| 235694_at   | <b>TCFL5</b>      | 10732 transcription factor-like 5 (basic helix-loop-helix)                                                                                              | 25.00  | 0.00 |
| 223455_at   | <b>TCHP</b>       | 84260 trichoplein, keratin filament binding                                                                                                             | -2.34  | 0.03 |
| 221624_at   | <b>TCL6</b>       | 27004 T-cell leukemia/lymphoma 6                                                                                                                        | 3.85   | 0.00 |
| 222011_s_at | <b>TCP1</b>       | 6950 t-complex 1                                                                                                                                        | 6.60   | 0.00 |
| 1553861_at  | <b>TCP11L2</b>    | 255394 t-complex 11 (mouse)-like 2                                                                                                                      | -30.87 | 0.00 |
| 232692_at   | <b>TDRD6</b>      | 221400 tudor domain containing 6                                                                                                                        | 15.63  | 0.10 |
| 218104_at   | <b>TEX10</b>      | 54881 testis expressed 10                                                                                                                               | 3.90   | 0.22 |
| 203176_s_at | <b>TFAM</b>       | 7019 transcription factor A, mitochondrial                                                                                                              | -2.95  | 0.58 |
| 50221_at    | <b>TFEB</b>       | 7942 transcription factor EB                                                                                                                            | -5.63  | 0.03 |
| 232383_at   | <b>TFEC</b>       | 22797 transcription factor EC                                                                                                                           | 79.46  | 0.00 |
| 217839_at   | <b>TFG</b>        | 10342 TRK-fused gene                                                                                                                                    | 2.19   | 0.10 |
| 202750_s_at | <b>TFIP11</b>     | 24144 tuftelin interacting protein 11                                                                                                                   | 2.46   | 0.10 |
| 209278_s_at | <b>TFPI2</b>      | 7980 tissue factor pathway inhibitor 2                                                                                                                  | 8.74   | 0.37 |
| 207332_s_at | <b>TFRC</b>       | 7037 transferrin receptor (p90, CD71)                                                                                                                   | 54.87  | 0.00 |
| 205016_at   | <b>TGFA</b>       | 7039 transforming growth factor, alpha<br>transforming growth factor, beta receptor II                                                                  | -7.54  | 0.00 |
| 208944_at   | <b>TGFBR2</b>     | 7048 (70/80kDa)                                                                                                                                         | -6.45  | 0.00 |
| 203313_s_at | <b>TGIF1</b>      | 7050 TGFB-induced factor homeobox 1<br>transglutaminase 2 (C polypeptide, protein-                                                                      | 9.30   | 0.00 |
| 211003_x_at | <b>TGM2</b>       | 7052 glutamine-gamma-glutamyltransferase)<br>trimethylguanosine synthase homolog (S.                                                                    | 12.13  | 0.00 |
| 219231_at   | <b>TGS1</b>       | 96764 cerevisiae)                                                                                                                                       | 2.14   | 0.00 |
| 1566888_at  | <b>THADA</b>      | 63892 Thyroid adenoma associated                                                                                                                        | -2.07  | 0.03 |
| 203887_s_at | <b>THBD</b>       | 7056 thrombomodulin                                                                                                                                     | -4.99  | 0.00 |
| 201110_s_at | <b>THBS1</b>      | 7057 thrombospondin 1                                                                                                                                   | 8.31   | 0.10 |
| 223804_s_at | <b>THUMPD3</b>    | 25917 THUMP domain containing 3                                                                                                                         | 2.81   | 0.58 |
| 223711_s_at | <b>THYN1</b>      | 29087 thymocyte nuclear protein 1                                                                                                                       | -2.25  | 0.58 |
| 213191_at   | <b>TICAM1</b>     | 148022 toll-like receptor adaptor molecule 1<br>TRAF-interacting protein with a forkhead-                                                               | 18.93  | 0.37 |
| 238858_at   | <b>TIFA</b>       | 92610 associated domain                                                                                                                                 | 6.55   | 0.00 |
| 229789_at   | <b>TIGD3</b>      | 220359 tigger transposable element derived 3                                                                                                            | -14.97 | 0.00 |

|             |                    |                                                                         |        |      |
|-------------|--------------------|-------------------------------------------------------------------------|--------|------|
| 218408_at   | <b>TIMM10</b>      | translocase of inner mitochondrial membrane 10<br>26519 homolog (yeast) | 10.70  | 0.00 |
|             |                    | translocase of inner mitochondrial membrane 17                          |        |      |
| 201821_s_at | <b>TIMM17A</b>     | 10440 homolog A (yeast)                                                 | 3.65   | 0.06 |
| 201666_at   | <b>TIMP1</b>       | 7076 TIMP metalloproteinase inhibitor 1                                 | 5.95   | 0.10 |
| 231579_s_at | <b>TIMP2</b>       | 7077 TIMP metalloproteinase inhibitor 2                                 | -3.86  | 0.00 |
| 47608_at    | <b>TJAP1</b>       | 93643 tight junction associated protein 1 (peripheral)                  | 7.23   | 0.06 |
| 208700_s_at | <b>TKT</b>         | 7086 transketolase (Wernicke-Korsakoff syndrome)                        | -9.57  | 0.00 |
| 216370_s_at | <b>TKTL1</b>       | 8277 transketolase-like 1                                               | 3.98   | 0.00 |
|             |                    | transducin-like enhancer of split 4 (E(sp1))                            |        |      |
| 214688_at   | <b>TLE4</b>        | 7091 homolog, Drosophila)                                               | -3.12  | 0.03 |
| 212997_s_at | <b>TLK2</b>        | 11011 tousled-like kinase 2                                             | -2.02  | 0.10 |
| 210176_at   | <b>TLR1</b>        | 7096 toll-like receptor 1                                               | -5.16  | 0.00 |
| 223750_s_at | <b>TLR10</b>       | 81793 toll-like receptor 10                                             | -3.33  | 0.58 |
| 210166_at   | <b>TLR5</b>        | 7100 toll-like receptor 5                                               | -18.31 | 0.03 |
| 207446_at   | <b>TLR6</b>        | 10333 toll-like receptor 6                                              | -8.89  | 0.03 |
| 220832_at   | <b>TLR8</b>        | 51311 toll-like receptor 8                                              | -2.67  | 0.00 |
| 212198_s_at | <b>TM9SF4</b>      | 9777 transmembrane 9 superfamily protein member 4                       | 4.38   | 0.22 |
| 213349_at   | <b>TMCC1</b>       | 23023 transmembrane and coiled-coil domain family 1                     | -4.16  | 0.10 |
| 226489_at   | <b>TMCC3</b>       | 57458 transmembrane and coiled-coil domain family 3                     | -7.26  | 0.00 |
| 226050_at   | <b>TMCO3</b>       | 55002 transmembrane and coiled-coil domains 3                           | -3.30  | 0.22 |
| 213550_s_at | <b>TMCO6</b>       | 55374 transmembrane and coiled-coil domains 6                           | -2.84  | 0.10 |
|             |                    | transmembrane emp24-like trafficking protein 10                         |        |      |
| 200929_at   | <b>TMED10</b>      | 10972 (yeast)                                                           | 3.85   | 0.00 |
|             |                    | transmembrane emp24 protein transport domain                            |        |      |
| 214658_at   | <b>TMED7</b>       | 51014 containing 7                                                      | 2.25   | 0.06 |
|             |                    | transmembrane emp24 protein transport domain                            |        |      |
| 205812_s_at | <b>TMED9</b>       | 54732 containing 9                                                      | 2.34   | 0.10 |
| 212682_s_at | <b>TMEM112B</b>    | 91289 transmembrane protein 112B                                        | -3.04  | 0.37 |
| 225588_s_at | <b>TMEM129</b>     | 92305 transmembrane protein 129                                         | -3.59  | 0.37 |
|             | <b>TMEM14B</b> /// | 51522 ///                                                               |        |      |
| 223105_s_at | <b>TMEM14C</b>     | transmembrane protein 14C ///                                           |        |      |
|             |                    | 81853 protein 14B                                                       | -2.16  | 0.37 |
| 226752_at   | <b>TMEM157</b>     | 345757 transmembrane protein 157                                        | -19.99 | 0.00 |
| 213338_at   | <b>TMEM158</b>     | 25907 transmembrane protein 158                                         | 15.08  | 0.37 |
| 223202_s_at | <b>TMEM164</b>     | 84187 transmembrane protein 164                                         | -4.53  | 0.00 |
| 224906_at   | <b>TMEM16F</b>     | 196527 transmembrane protein 16F                                        | 3.73   | 0.22 |
| 218113_at   | <b>TMEM2</b>       | 23670 transmembrane protein 2                                           | -3.59  | 0.00 |
| 222735_at   | <b>TMEM38B</b>     | 55151 transmembrane protein 38B                                         | 7.84   | 0.22 |
| 241392_at   | <b>TMEM39A</b>     | 55254 Transmembrane protein 39A                                         | 9.87   | 0.03 |
| 209796_s_at | <b>TMEM4</b>       | 10330 transmembrane protein 4                                           | 3.09   | 0.06 |
| 217795_s_at | <b>TMEM43</b>      | 79188 transmembrane protein 43                                          | -6.46  | 0.00 |
|             | <b>TMEM54</b> ///  | 10975 ///                                                               |        |      |
| 202090_s_at | <b>UQCR</b>        | ubiquinol-cytochrome c reductase, 6.4kDa subunit<br>113452 ///          | -4.27  | 0.10 |
| 226338_at   | <b>TMEM55A</b>     | 55529 transmembrane protein 55A                                         | -7.16  | 0.00 |
| 225287_s_at | <b>TMEM55B</b>     | 90809 transmembrane protein 55B                                         | 2.84   | 0.06 |
| 241342_at   | <b>TMEM65</b>      | 157378 transmembrane protein 65                                         | -5.09  | 0.37 |
| 200847_s_at | <b>TMEM66</b>      | 51669 transmembrane protein 66                                          | -2.53  | 0.00 |
| 226483_at   | <b>TMEM68</b>      | 137695 transmembrane protein 68                                         | 4.09   | 0.58 |
| 238429_at   | <b>TMEM71</b>      | 137835 transmembrane protein 71                                         | -22.85 | 0.00 |
|             |                    | transmembrane protein 8 (five membrane-                                 |        |      |
| 221882_s_at | <b>TMEM8</b>       | 58986 spanning domains)                                                 | -3.34  | 0.22 |
| 229957_at   | <b>TMEM91</b>      | 641649 transmembrane protein 91                                         | -6.81  | 0.00 |
| 222449_at   | <b>TMEPAI</b>      | 56937 transmembrane, prostate androgen induced RNA                      | -2.98  | 0.06 |

|             |                    |                                                                                                              |        |      |
|-------------|--------------------|--------------------------------------------------------------------------------------------------------------|--------|------|
| 223659_at   | <b>TMPRSS13</b>    | 84000 transmembrane protease, serine 13<br>transmembrane and tetratricopeptide repeat                        | 2.21   | 0.37 |
| 224397_s_at | <b>TMTC1</b>       | 83857 containing 1<br>tumor necrosis factor (TNF superfamily, member                                         | -5.60  | 0.13 |
| 207113_s_at | <b>TNF</b>         | 7124 2)                                                                                                      | 9.69   | 0.00 |
| 202643_s_at | <b>TNFAIP3</b>     | 7128 tumor necrosis factor, alpha-induced protein 3                                                          | 36.15  | 0.00 |
| 206025_s_at | <b>TNFAIP6</b>     | 7130 tumor necrosis factor, alpha-induced protein 6<br>tumor necrosis factor, alpha-induced protein 8-like   | 9.91   | 0.00 |
| 223583_at   | <b>TNFAIP8L2</b>   | 79626 2<br>tumor necrosis factor receptor superfamily,                                                       | -3.07  | 0.37 |
| 231775_at   | <b>TNFRSF10A</b>   | 8797 member 10a<br>tumor necrosis factor receptor superfamily,<br>member 10c, decoy without an intracellular | 2.87   | 0.22 |
| 211163_s_at | <b>TNFRSF10C</b>   | 8794 domain<br>tumor necrosis factor receptor superfamily,                                                   | -20.85 | 0.00 |
| 224090_s_at | <b>TNFRSF19</b>    | 55504 member 19<br>tumor necrosis factor receptor superfamily,                                               | 2.18   | 0.00 |
| 203508_at   | <b>TNFRSF1B</b>    | 7133 member 1B<br>tumor necrosis factor receptor superfamily,                                                | 2.19   | 0.00 |
| 214581_x_at | <b>TNFRSF21</b>    | 27242 member 21<br>tumor necrosis factor receptor superfamily,                                               | 8.39   | 0.58 |
| 206729_at   | <b>TNFRSF8</b>     | 943 member 8<br>tumor necrosis factor receptor superfamily,                                                  | 3.35   | 0.13 |
| 207536_s_at | <b>TNFRSF9</b>     | 3604 member 9<br>tumor necrosis factor (ligand) superfamily,                                                 | 2.35   | 0.37 |
| 202687_s_at | <b>TNFSF10</b>     | 8743 member 10                                                                                               | -2.96  | 0.00 |
|             | <b>TNFSF12-</b>    | tumor necrosis factor (ligand) superfamily,                                                                  |        |      |
|             | <b>TNFSF13 ///</b> | 407977 ///<br>member 13 ///<br>tumor necrosis factor (ligand)                                                |        |      |
| 209500_x_at | <b>TNFSF13</b>     | 8741 superfamily, member 12-member 13<br>tumor necrosis factor (ligand) superfamily,                         | -5.13  | 0.13 |
| 223501_at   | <b>TNFSF13B</b>    | 10673 member 13b<br>tumor necrosis factor (ligand) superfamily,                                              | -2.66  | 0.00 |
| 221085_at   | <b>TNFSF15</b>     | 9966 member 15<br>tumor necrosis factor (ligand) superfamily,                                                | 15.66  | 0.00 |
| 206907_at   | <b>TNFSF9</b>      | 8744 member 9                                                                                                | 34.70  | 0.10 |
| 207196_s_at | <b>TNIP1</b>       | 10318 TNFAIP3 interacting protein 1                                                                          | 2.29   | 0.00 |
| 220655_at   | <b>TNIP3</b>       | 79931 TNFAIP3 interacting protein 3                                                                          | 120.69 | 0.00 |
| 212635_at   | <b>TNPO1</b>       | 3842 transportin 1                                                                                           | -2.43  | 0.06 |
| 217931_at   | <b>TNRC5</b>       | 10695 trinucleotide repeat containing 5                                                                      | -6.88  | 0.00 |
| 240044_x_at | <b>TNRC6B</b>      | 23112 Trinucleotide repeat containing 6B                                                                     | -6.03  | 0.00 |
| 222820_at   | <b>TNRC6C</b>      | 57690 trinucleotide repeat containing 6C                                                                     | -3.03  | 0.37 |
| 202807_s_at | <b>TOM1</b>        | 10043 target of myb1 (chicken)                                                                               | 4.34   | 0.00 |
| 226198_at   | <b>TOM1L2</b>      | 146691 target of myb1-like 2 (chicken)<br>translocase of outer mitochondrial membrane 40                     | -5.80  | 0.06 |
| 226059_at   | <b>TOMM40L</b>     | 84134 homolog (yeast)-like                                                                                   | 7.70   | 0.22 |
| 202633_at   | <b>TOPBP1</b>      | 11073 topoisomerase (DNA) II binding protein 1                                                               | -4.12  | 0.37 |
| 204071_s_at | <b>TOPORS</b>      | 10210 topoisomerase I binding, arginine/serine-rich                                                          | -3.95  | 0.00 |
| 203050_at   | <b>TP53BP1</b>     | 7158 tumor protein p53 binding protein 1                                                                     | 3.19   | 0.03 |
| 203421_at   | <b>TP53I11</b>     | 9537 tumor protein p53 inducible protein 11                                                                  | -7.58  | 0.00 |
| 225912_at   | <b>TP53INP1</b>    | 94241 tumor protein p53 inducible nuclear protein 1                                                          | -3.85  | 0.00 |
| 235194_at   | <b>TPCN2</b>       | 219931 two pore segment channel 2                                                                            | -3.14  | 0.03 |
| 200742_s_at | <b>TPP1</b>        | 1200 tripeptidyl peptidase I<br>translocated promoter region (to activated MET                               | 4.38   | 0.00 |
| 201731_s_at | <b>TPR</b>         | 7175 oncogene)                                                                                               | -2.95  | 0.00 |
| 205599_at   | <b>TRAF1</b>       | 7185 TNF receptor-associated factor 1                                                                        | 71.62  | 0.00 |
| 208315_x_at | <b>TRAF3</b>       | 7187 TNF receptor-associated factor 3                                                                        | 7.35   | 0.00 |
| 215411_s_at | <b>TRAF3IP2</b>    | 10758 TRAF3 interacting protein 2                                                                            | 9.72   | 0.00 |
| 205804_s_at | <b>TRAF3IP3</b>    | 80342 TRAF3 interacting protein 3                                                                            | 2.74   | 0.00 |
| 202871_at   | <b>TRAF4</b>       | 9618 TNF receptor-associated factor 4                                                                        | 8.05   | 0.37 |



|             |                   |                                                                                                        |        |      |
|-------------|-------------------|--------------------------------------------------------------------------------------------------------|--------|------|
| 201399_s_at | <b>TRAM1</b>      | 23471 translocation associated membrane protein 1                                                      | 2.66   | 0.10 |
| 203511_s_at | <b>TRAPPC3</b>    | 27095 trafficking protein particle complex 3<br>triggering receptor expressed on myeloid cells-like    | 3.47   | 0.22 |
| 219748_at   | <b>TREML2</b>     | 79865 2                                                                                                | -2.60  | 0.03 |
| 229016_s_at | <b>TRERF1</b>     | 55809 transcriptional regulating factor 1                                                              | -12.42 | 0.10 |
| 218145_at   | <b>TRIB3</b>      | 57761 tribbles homolog 3 (Drosophila)                                                                  | 13.59  | 0.37 |
| 210541_s_at | <b>TRIM27</b>     | 5987 tripartite motif-containing 27                                                                    | -5.96  | 0.00 |
| 211001_at   | <b>TRIM29</b>     | 23650 tripartite motif-containing 29                                                                   | 2.01   | 0.22 |
|             | <b>TRIM34 ///</b> |                                                                                                        |        |      |
|             | <b>TRIM6-</b>     | 445372 ///<br>tripartite motif-containing 34 ///<br>tripartite motif-                                  |        |      |
| 221044_s_at | <b>TRIM34</b>     | 53840 containing 6 and tripartite motif-containing 34                                                  | -2.71  | 0.58 |
| 219736_at   | <b>TRIM36</b>     | 55521 tripartite motif-containing 36                                                                   | 11.10  | 0.58 |
| 1568592_at  | <b>TRIM69</b>     | 140691 tripartite motif-containing 69                                                                  | 2.26   | 0.00 |
| 221012_s_at | <b>TRIM8</b>      | 81603 tripartite motif-containing 8                                                                    | -6.92  | 0.00 |
| 202734_at   | <b>TRIP10</b>     | 9322 thyroid hormone receptor interactor 10<br>TRM5 tRNA methyltransferase 5 homolog (S.               | 39.56  | 0.00 |
| 221952_x_at | <b>TRMT5</b>      | 57570 cerevisiae)                                                                                      | -2.46  | 0.00 |
| 222768_s_at | <b>TRMT6</b>      | 51605 tRNA methyltransferase 6 homolog (S. cerevisiae)<br>transient receptor potential cation channel, | 3.58   | 0.37 |
| 205708_s_at | <b>TRPM2</b>      | 7226 subfamily M, member 2<br>Transient receptor potential cation channel,                             | 2.30   | 0.37 |
| 240389_at   | <b>TRPM6</b>      | 140803 subfamily M, member 6<br>transient receptor potential cation channel,                           | -10.64 | 0.00 |
| 223324_s_at | <b>TRPM7</b>      | 54822 subfamily M, member 7<br>transient receptor potential cation channel,                            | 6.96   | 0.13 |
| 1552586_at  | <b>TRPV3</b>      | 162514 subfamily V, member 3<br>TruB pseudouridine (psi) synthase homolog 1 (E.                        | 2.49   | 0.37 |
| 241606_s_at | <b>TRUB1</b>      | 142940 coli)                                                                                           | 2.29   | 0.37 |
| 204094_s_at | <b>TSC22D2</b>    | 9819 TSC22 domain family, member 2                                                                     | 2.34   | 0.03 |
| 208763_s_at | <b>TSC22D3</b>    | 1831 TSC22 domain family, member 3<br>tRNA splicing endonuclease 34 homolog (S.                        | -3.16  | 0.00 |
| 218132_s_at | <b>TSEN34</b>     | 79042 cerevisiae)                                                                                      | -5.94  | 0.00 |
| 214331_at   | <b>TSFM</b>       | 10102 Ts translation elongation factor, mitochondrial                                                  | -3.77  | 0.37 |
| 238973_s_at | <b>TSNAX</b>      | 7257 translin-associated factor X                                                                      | 2.10   | 0.00 |
| 221002_s_at | <b>TSPAN14</b>    | 81619 tetraspanin 14                                                                                   | 2.39   | 0.22 |
| 218693_at   | <b>TSPAN15</b>    | 23555 tetraspanin 15                                                                                   | 2.12   | 0.37 |
| 242179_s_at | <b>TSPAN16</b>    | 26526 tetraspanin 16                                                                                   | -5.47  | 0.06 |
| 227236_at   | <b>TSPAN2</b>     | 10100 tetraspanin 2                                                                                    | -14.02 | 0.10 |
| 202242_at   | <b>TSPAN7</b>     | 7102 tetraspanin 7                                                                                     | 2.05   | 0.37 |
| 201434_at   | <b>TTC1</b>       | 7265 tetratricopeptide repeat domain 1                                                                 | 2.43   | 0.22 |
| 1554672_at  | <b>TTC26</b>      | 79989 tetratricopeptide repeat domain 26                                                               | 2.52   | 0.13 |
| 203584_at   | <b>TTC35</b>      | 9694 tetratricopeptide repeat domain 35                                                                | 3.32   | 0.03 |
| 226120_at   | <b>TTC8</b>       | 123016 tetratricopeptide repeat domain 8                                                               | -2.21  | 0.22 |
| 227386_s_at | <b>TTMB</b>       | 399474 TTMB protein                                                                                    | -3.52  | 0.00 |
| 209118_s_at | <b>TUBA1A</b>     | 7846 tubulin, alpha 1a                                                                                 | -3.36  | 0.00 |
| 212639_x_at | <b>TUBA1B</b>     | 10376 tubulin, alpha 1b                                                                                | -2.02  | 0.00 |
| 211750_x_at | <b>TUBA1C</b>     | 84790 tubulin, alpha 1c                                                                                | -3.38  | 0.00 |
| 210527_x_at | <b>TUBA3C</b>     | 7278 tubulin, alpha 3c                                                                                 | -2.40  | 0.13 |
| 212242_at   | <b>TUBA4A</b>     | 7277 tubulin, alpha 4a                                                                                 | -2.47  | 0.00 |
| 207490_at   | <b>TUBA4B</b>     | 80086 tubulin, alpha 4b (pseudogene)                                                                   | -3.03  | 0.00 |
| 204141_at   | <b>TUBB2A</b>     | 7280 tubulin, beta 2A                                                                                  | 17.68  | 0.37 |
| 214876_s_at | <b>TUBGCP5</b>    | 114791 tubulin, gamma complex associated protein 5                                                     | 3.35   | 0.37 |
| 223325_at   | <b>TXNDC11</b>    | 51061 thioredoxin domain containing 11                                                                 | 2.16   | 0.22 |
| 201580_s_at | <b>TXNDC13</b>    | 56255 thioredoxin domain containing 13                                                                 | -11.88 | 0.00 |
| 201175_at   | <b>TXNDC14</b>    | 51075 thioredoxin domain containing 14                                                                 | 4.50   | 0.22 |
| 201008_s_at | <b>TXNIP</b>      | 10628 thioredoxin interacting protein                                                                  | -3.07  | 0.00 |

|             |               |                                                                                        |       |      |
|-------------|---------------|----------------------------------------------------------------------------------------|-------|------|
| 205546_s_at | <b>TYK2</b>   | 7297 tyrosine kinase 2                                                                 | -3.72 | 0.06 |
| 209947_at   | <b>UBAP2L</b> | 9898 ubiquitin associated protein 2-like                                               | 2.23  | 0.58 |
| 205890_s_at | <b>UBD</b>    | 10537 ubiquitin D                                                                      | 17.02 | 0.00 |
| 203281_s_at | <b>UBE1L</b>  | 7318 ubiquitin-activating enzyme E1-like<br>ubiquitin-conjugating enzyme E2D 1 (UBC4/5 | -3.67 | 0.10 |
| 214590_s_at | <b>UBE2D1</b> | 7321 homolog, yeast)<br>ubiquitin-conjugating enzyme E2E 1 (UBC4/5                     | -2.91 | 0.00 |
| 212519_at   | <b>UBE2E1</b> | 7324 homolog, yeast)<br>ubiquitin-conjugating enzyme E2E 3 (UBC4/5                     | 3.15  | 0.00 |
| 210024_s_at | <b>UBE2E3</b> | 10477 homolog, yeast)<br>ubiquitin-conjugating enzyme E2G 1 (UBC7                      | -3.73 | 0.37 |
| 209141_at   | <b>UBE2G1</b> | 7326 homolog, yeast)<br>ubiquitin-conjugating enzyme E2H (UBC8                         | -2.75 | 0.22 |
| 221962_s_at | <b>UBE2H</b>  | 7328 homolog, yeast)<br>ubiquitin-conjugating enzyme E2, J1 (UBC6                      | 2.93  | 0.58 |
| 217823_s_at | <b>UBE2J1</b> | 51465 homolog, yeast)                                                                  | -2.78 | 0.06 |
| 201649_at   | <b>UBE2L6</b> | 9246 ubiquitin-conjugating enzyme E2L 6                                                | 2.16  | 0.00 |
| 217750_s_at | <b>UBE2Z</b>  | 65264 ubiquitin-conjugating enzyme E2Z                                                 | 6.23  | 0.00 |
| 202317_s_at | <b>UBE4B</b>  | 10277 ubiquitination factor E4B (UFD2 homolog, yeast)                                  | -3.55 | 0.00 |
| 205687_at   | <b>UBFD1</b>  | 56061 ubiquitin family domain containing 1                                             | 4.97  | 0.58 |
| 207253_s_at | <b>UBN1</b>   | 29855 ubinuclein 1                                                                     | -2.30 | 0.00 |
| 224513_s_at | <b>UBQLN4</b> | 56893 ubiquilin 4<br>ubiquitin protein ligase E3 component n-recognin                  | 7.66  | 0.58 |
| 238528_at   | <b>UBR1</b>   | 197131 1<br>ubiquitin protein ligase E3 component n-recognin                           | 5.90  | 0.10 |
| 212756_s_at | <b>UBR2</b>   | 23304 2<br>ubiquitin protein ligase E3 component n-recognin                            | -5.47 | 0.00 |
| 211950_at   | <b>UBR4</b>   | 23352 4<br>Ubiquitin protein ligase E3 component n-recognin                            | 3.26  | 0.37 |
| 1555888_at  | <b>UBR5</b>   | 51366 5                                                                                | -6.04 | 0.00 |
| 224827_at   | <b>UBTD2</b>  | 92181 ubiquitin domain containing 2<br>upstream binding transcription factor, RNA      | 3.66  | 0.10 |
| 214881_s_at | <b>UBTF</b>   | 7343 polymerase I                                                                      | -3.26 | 0.37 |
| 223012_at   | <b>UBXD1</b>  | 80700 UBX domain containing 1                                                          | -3.65 | 0.10 |
| 218050_at   | <b>UFM1</b>   | 51569 ubiquitin-fold modifier 1                                                        | 3.01  | 0.00 |
| 224967_at   | <b>UGCG</b>   | 7357 UDP-glucose ceramide glucosyltransferase                                          | 2.58  | 0.00 |
| 220746_s_at | <b>UIMC1</b>  | 51720 ubiquitin interaction motif containing 1                                         | -3.14 | 0.03 |
| 209333_at   | <b>ULK1</b>   | 8408 unc-51-like kinase 1 (C. elegans)                                                 | -4.16 | 0.22 |
| 203271_s_at | <b>UNC119</b> | 9094 unc-119 homolog (C. elegans)                                                      | 2.25  | 0.10 |
| 206189_at   | <b>UNC5C</b>  | 8633 unc-5 homolog C (C. elegans)                                                      | 3.20  | 0.37 |
| 230210_at   | <b>UNC84A</b> | 23353 unc-84 homolog A (C. elegans)                                                    | 2.51  | 0.37 |
| 212144_at   | <b>UNC84B</b> | 25777 unc-84 homolog B (C. elegans)                                                    | -2.09 | 0.13 |
| 228219_s_at | <b>UPB1</b>   | 51733 ureidopropionase, beta<br>UPF2 regulator of nonsense transcripts homolog         | 19.54 | 0.06 |
| 203519_s_at | <b>UPF2</b>   | 26019 (yeast)<br>UPF3 regulator of nonsense transcripts homolog                        | -2.87 | 0.00 |
| 218757_s_at | <b>UPF3B</b>  | 65109 B (yeast)                                                                        | 2.43  | 0.58 |
| 210064_s_at | <b>UPK1B</b>  | 7348 uroplakin 1B                                                                      | 2.12  | 0.37 |
| 218601_at   | <b>URG4</b>   | 55665 up-regulated gene 4                                                              | 5.30  | 0.13 |
| 202152_x_at | <b>USF2</b>   | 7392 upstream transcription factor 2, c-fos interacting                                | 2.04  | 0.22 |
| 209137_s_at | <b>USP10</b>  | 9100 ubiquitin specific peptidase 10                                                   | -4.87 | 0.00 |
| 213327_s_at | <b>USP12</b>  | 219333 ubiquitin specific peptidase 12                                                 | 2.04  | 0.10 |
| 209475_at   | <b>USP15</b>  | 9958 ubiquitin specific peptidase 15                                                   | -2.40 | 0.00 |
| 212513_s_at | <b>USP33</b>  | 23032 ubiquitin specific peptidase 33                                                  | -2.14 | 0.37 |
| 202682_s_at | <b>USP4</b>   | 7375 ubiquitin specific peptidase 4 (proto-oncogene)                                   | -2.05 | 0.03 |
| 220784_s_at | <b>UTS2</b>   | 10911 urotensin 2                                                                      | 2.21  | 0.13 |

|             |                |                                                                                                    |        |      |
|-------------|----------------|----------------------------------------------------------------------------------------------------|--------|------|
| 203241_at   | <b>UVRAG</b>   | 7405 UV radiation resistance associated gene                                                       | 3.28   | 0.22 |
| 208846_s_at | <b>VDAC3</b>   | 7419 voltage-dependent anion channel 3                                                             | -2.98  | 0.00 |
| 201831_s_at | <b>VDP</b>     | 8615 vesicle docking protein p115                                                                  | 2.75   | 0.00 |
| 211527_x_at | <b>VEGFA</b>   | 7422 vascular endothelial growth factor A                                                          | 22.43  | 0.00 |
| 214004_s_at | <b>VGLL4</b>   | 9686 vestigial like 4 (Drosophila)                                                                 | 3.98   | 0.37 |
| 209950_s_at | <b>VILL</b>    | 50853 villin-like<br>vacuolar protein sorting 13 homolog C (S.                                     | 3.69   | 0.37 |
| 218396_at   | <b>VPS13C</b>  | 54832 cerevisiae)                                                                                  | 3.93   | 0.00 |
| 212323_s_at | <b>VPS13D</b>  | 55187 cerevisiae)<br>vacuolar protein sorting 13 homolog D (S.                                     | 3.86   | 0.22 |
| 223346_at   | <b>VPS18</b>   | 57617 cerevisiae)                                                                                  | 3.88   | 0.06 |
| 222437_s_at | <b>VPS24</b>   | 51652 cerevisiae)<br>vacuolar protein sorting 24 homolog (S.                                       | -2.01  | 0.22 |
| 225483_at   | <b>VPS26B</b>  | 112936 vacuolar protein sorting 26 homolog B (S. pombe)<br>vacuolar protein sorting 41 homolog (S. | -5.35  | 0.22 |
| 235625_at   | <b>VPS41</b>   | 27072 cerevisiae)                                                                                  | -2.67  | 0.37 |
| 200629_at   | <b>WARS</b>    | 7453 tryptophanyl-tRNA synthetase<br>Wiskott-Aldrich syndrome (eczema-                             | 4.08   | 0.00 |
| 205400_at   | <b>WAS</b>     | 7454 thrombocytopenia)                                                                             | -2.12  | 0.06 |
| 224563_at   | <b>WASF2</b>   | 10163 WAS protein family, member 2<br>Williams Beuren syndrome chromosome region                   | -4.18  | 0.13 |
| 239194_at   | <b>WBSCR18</b> | 84277 18                                                                                           | 2.04   | 0.22 |
| 233559_s_at | <b>WDFY1</b>   | 57590 WD repeat and FYVE domain containing 1                                                       | 2.69   | 0.37 |
| 209216_at   | <b>WDR45</b>   | 11152 WD repeat domain 45                                                                          | -3.37  | 0.13 |
| 65591_at    | <b>WDR48</b>   | 57599 WD repeat domain 48                                                                          | 3.52   | 0.22 |
| 224076_s_at | <b>WHSC1L1</b> | 54904 Wolf-Hirschhorn syndrome candidate 1-like 1                                                  | -11.34 | 0.00 |
| 213836_s_at | <b>WIPI1</b>   | 55062 WD repeat domain, phosphoinositide interacting 1                                             | -5.18  | 0.06 |
| 204710_s_at | <b>WIPI2</b>   | 26100 WD repeat domain, phosphoinositide interacting 2                                             | -3.50  | 0.00 |
| 210561_s_at | <b>WSB1</b>    | 26118 WD repeat and SOCS box-containing 1                                                          | 2.04   | 0.00 |
| 214759_at   | <b>WTAP</b>    | 9589 Wilms tumor 1 associated protein                                                              | 4.92   | 0.00 |
| 222738_at   | <b>WWC2</b>    | 80014 WW and C2 domain containing 2                                                                | 2.52   | 0.06 |
| 219520_s_at | <b>WWC3</b>    | 55841 WWC family member 3                                                                          | -5.50  | 0.22 |
| 228617_at   | <b>XAF1</b>    | 54739 XIAP associated factor-1                                                                     | 6.76   | 0.00 |
| 200670_at   | <b>XBP1</b>    | 7494 X-box binding protein 1                                                                       | 25.26  | 0.00 |
| 224589_at   | <b>XIST</b>    | 7503 X (inactive)-specific transcript<br>XK, Kell blood group complex subunit-related              | -2.41  | 0.37 |
| 218753_at   | <b>XKR8</b>    | 55113 family, member 8<br>xeroderma pigmentosum, complementation group                             | -4.62  | 0.37 |
| 209375_at   | <b>XPC</b>     | 7508 C                                                                                             | -2.54  | 0.37 |
| 214784_x_at | <b>XPO6</b>    | 23214 exportin 6<br>X-ray repair complementing defective repair in                                 | -8.65  | 0.00 |
| 205071_x_at | <b>XRCC4</b>   | 7518 Chinese hamster cells 4                                                                       | -5.34  | 0.37 |
| 1570394_at  | <b>XRN1</b>    | 54464 5'-3' exoribonuclease 1                                                                      | 3.56   | 0.22 |
| 212341_at   | <b>YIPF6</b>   | 286451 Yip1 domain family, member 6                                                                | 2.05   | 0.10 |
| 216304_x_at | <b>YME1L1</b>  | 10730 YME1-like 1 (S. cerevisiae)                                                                  | 2.00   | 0.06 |
| 232077_s_at | <b>YPEL3</b>   | 83719 yippee-like 3 (Drosophila)                                                                   | -10.80 | 0.00 |
| 217812_at   | <b>YTHDF2</b>  | 51441 YTH domain family, member 2                                                                  | 2.10   | 0.10 |
| 224718_at   | <b>YY1</b>     | 7528 YY1 transcription factor                                                                      | -2.62  | 0.13 |
| 227608_at   | <b>YY1AP1</b>  | 55249 YY1 associated protein 1                                                                     | -2.26  | 0.06 |
| 213376_at   | <b>ZBTB1</b>   | 22890 zinc finger and BTB domain containing 1                                                      | 3.94   | 0.03 |
| 203601_s_at | <b>ZBTB17</b>  | 7709 zinc finger and BTB domain containing 17                                                      | 2.10   | 0.22 |
| 214482_at   | <b>ZBTB25</b>  | 7597 zinc finger and BTB domain containing 25                                                      | 5.18   | 0.06 |
| 227111_at   | <b>ZBTB34</b>  | 403341 zinc finger and BTB domain containing 34                                                    | -3.05  | 0.06 |
| 226148_at   | <b>ZBTB44</b>  | 29068 zinc finger and BTB domain containing 44                                                     | -5.90  | 0.00 |

|              |                |                                                 |        |      |
|--------------|----------------|-------------------------------------------------|--------|------|
| 227329_at    | <b>ZBTB46</b>  | 140685 zinc finger and BTB domain containing 46 | 8.81   | 0.22 |
| 218810_at    | <b>ZC3H12A</b> | 80149 zinc finger CCCH-type containing 12A      | 3.34   | 0.00 |
| 231899_at    | <b>ZC3H12C</b> | 85463 zinc finger CCCH-type containing 12C      | 42.01  | 0.03 |
| 218348_s_at  | <b>ZC3H7A</b>  | 29066 zinc finger CCCH-type containing 7A       | 2.30   | 0.10 |
| 221193_s_at  | <b>ZCCHC10</b> | 54819 zinc finger, CCHC domain containing 10    | 4.44   | 0.00 |
| 242776_at    | <b>ZCCHC6</b>  | 79670 zinc finger, CCHC domain containing 6     | -2.24  | 0.00 |
| 212982_at    | <b>ZDHHC17</b> | 23390 zinc finger, DHHC-type containing 17      | -2.88  | 0.00 |
| 222731_at    | <b>ZDHHC2</b>  | 51201 zinc finger, DHHC-type containing 2       | -4.25  | 0.10 |
| 218606_at    | <b>ZDHHC7</b>  | 55625 zinc finger, DHHC-type containing 7       | -2.55  | 0.13 |
| 203603_s_at  | <b>ZEB2</b>    | 9839 zinc finger E-box binding homeobox 2       | 3.86   | 0.00 |
| 202456_s_at  | <b>ZER1</b>    | 10444 zer-1 homolog (C. elegans)                | -6.72  | 0.10 |
| 226168_at    | <b>ZFAND2B</b> | 130617 zinc finger, AN1-type domain 2B          | -3.07  | 0.13 |
| 217781_s_at  | <b>ZFP106</b>  | 64397 zinc finger protein 106 homolog (mouse)   | -2.58  | 0.13 |
| 201368_at    | <b>ZFP36L2</b> | 678 zinc finger protein 36, C3H type-like 2     | -4.50  | 0.00 |
| 1555011_at   | <b>ZFYVE16</b> | 9765 zinc finger, FYVE domain containing 16     | 4.06   | 0.37 |
| 213073_at    | <b>ZFYVE26</b> | 23503 zinc finger, FYVE domain containing 26    | 7.92   | 0.00 |
| 203556_at    | <b>ZHX2</b>    | 22882 zinc fingers and homeoboxes 2             | 2.62   | 0.00 |
| 224782_at    | <b>ZMAT2</b>   | 153527 zinc finger, matrin type 2               | -2.23  | 0.13 |
| 212124_at    | <b>ZMIZ1</b>   | 57178 zinc finger, MIZ-type containing 1        | 2.46   | 0.00 |
| 202778_s_at  | <b>ZMYM2</b>   | 7750 zinc finger, MYM-type 2                    | -4.17  | 0.58 |
| 1560854_s_at | <b>ZNF107</b>  | 51427 zinc finger protein 107                   | -3.11  | 0.37 |
| 204523_at    | <b>ZNF140</b>  | 7699 zinc finger protein 140                    | 3.89   | 0.10 |
| 208019_at    | <b>ZNF157</b>  | 7712 zinc finger protein 157                    | 2.43   | 0.00 |
| 205252_at    | <b>ZNF174</b>  | 7727 zinc finger protein 174                    | -2.26  | 0.22 |
| 203585_at    | <b>ZNF185</b>  | 7739 zinc finger protein 185 (LIM domain)       | -13.20 | 0.00 |
| 207513_s_at  | <b>ZNF189</b>  | 7743 zinc finger protein 189                    | 3.04   | 0.37 |
| 203739_at    | <b>ZNF217</b>  | 7764 zinc finger protein 217                    | -3.32  | 0.00 |
| 218005_at    | <b>ZNF22</b>   | 7570 zinc finger protein 22 (KOX 15)            | 2.67   | 0.03 |
| 207128_s_at  | <b>ZNF223</b>  | 7766 zinc finger protein 223                    | 3.59   | 0.37 |
| 212774_at    | <b>ZNF238</b>  | 10472 zinc finger protein 238                   | -3.71  | 0.00 |
| 203248_at    | <b>ZNF24</b>   | 7572 zinc finger protein 24                     | 2.75   | 0.03 |
| 206862_at    | <b>ZNF254</b>  | 9534 zinc finger protein 254                    | -2.95  | 0.00 |
| 204937_s_at  | <b>ZNF274</b>  | 10782 zinc finger protein 274                   | 2.12   | 0.06 |
| 218401_s_at  | <b>ZNF281</b>  | 23528 zinc finger protein 281                   | -2.46  | 0.00 |
| 212368_at    | <b>ZNF292</b>  | 23036 zinc finger protein 292                   | 2.81   | 0.03 |
| 203521_s_at  | <b>ZNF318</b>  | 24149 zinc finger protein 318                   | 8.13   | 0.37 |
| 231864_at    | <b>ZNF33A</b>  | 7581 zinc finger protein 33A                    | -3.39  | 0.00 |
| 215022_x_at  | <b>ZNF33B</b>  | 7582 zinc finger protein 33B                    | -4.55  | 0.00 |
| 207296_at    | <b>ZNF343</b>  | 79175 zinc finger protein 343                   | 3.97   | 0.10 |
| 205427_at    | <b>ZNF354A</b> | 6940 zinc finger protein 354A                   | -3.63  | 0.06 |
| 226468_at    | <b>ZNF364</b>  | 27246 zinc finger protein 364                   | 3.99   | 0.10 |
| 229551_x_at  | <b>ZNF367</b>  | 195828 zinc finger protein 367                  | 2.77   | 0.37 |
| 235414_at    | <b>ZNF383</b>  | 163087 zinc finger protein 383                  | -14.82 | 0.22 |
| 214714_at    | <b>ZNF394</b>  | 84124 zinc finger protein 394                   | -2.24  | 0.37 |
| 227768_at    | <b>ZNF407</b>  | 55628 zinc finger protein 407                   | 2.24   | 0.37 |
| 229743_at    | <b>ZNF438</b>  | 220929 zinc finger protein 438                  | 3.09   | 0.03 |
| 241066_at    | <b>ZNF449</b>  | 203523 zinc finger protein 449                  | 2.06   | 0.37 |
| 214746_s_at  | <b>ZNF467</b>  | 168544 zinc finger protein 467                  | -14.41 | 0.00 |
| 203604_at    | <b>ZNF516</b>  | 9658 zinc finger protein 516                    | -4.21  | 0.22 |
| 230205_at    | <b>ZNF561</b>  | 93134 zinc finger protein 561                   | -3.31  | 0.13 |
| 219711_at    | <b>ZNF586</b>  | 54807 zinc finger protein 586                   | -5.38  | 0.03 |
| 227507_at    | <b>ZNF592</b>  | 9640 zinc finger protein 592                    | -3.51  | 0.10 |
| 232367_x_at  | <b>ZNF598</b>  | 90850 zinc finger protein 598                   | -4.42  | 0.10 |
| 235179_at    | <b>ZNF641</b>  | 121274 zinc finger protein 641                  | -2.31  | 0.37 |
| 230029_x_at  | <b>ZNF650</b>  | 130507 zinc finger protein 650                  | -4.26  | 0.22 |

|             |               |                                                    |       |      |
|-------------|---------------|----------------------------------------------------|-------|------|
| 225266_at   | <b>ZNF652</b> | 22834 zinc finger protein 652                      | -8.57 | 0.00 |
| 222851_at   | <b>ZNF654</b> | 55279 zinc finger protein 654                      | 3.34  | 0.37 |
| 227445_at   | <b>ZNF689</b> | 115509 zinc finger protein 689                     | -4.24 | 0.13 |
| 227080_at   | <b>ZNF697</b> | 90874 zinc finger protein 697                      | 6.07  | 0.00 |
| 227132_at   | <b>ZNF706</b> | 51123 zinc finger protein 706                      | 2.14  | 0.13 |
| 39891_at    | <b>ZNF710</b> | 374655 zinc finger protein 710                     | 2.23  | 0.00 |
| 225848_at   | <b>ZNF746</b> | 155061 zinc finger protein 746                     | -6.30 | 0.03 |
| 221968_s_at | <b>ZNF771</b> | 51333 Zinc finger protein 771                      | 2.08  | 0.03 |
| 239838_at   | <b>ZNF776</b> | 284309 Zinc finger protein 776                     | -2.77 | 0.37 |
| 225131_at   | <b>ZRANB1</b> | 54764 zinc finger, RAN-binding domain containing 1 | -3.00 | 0.37 |
| 225338_at   | <b>ZYG11B</b> | 79699 zyg-11 homolog B (C. elegans)                | -8.22 | 0.10 |
| 200808_s_at | <b>ZYX</b>    | 7791 zyxin                                         | -5.16 | 0.00 |
| 207190_at   | <b>ZZEF1</b>  | 23140 zinc finger, ZZ-type with EF-hand domain 1   | -2.49 | 0.37 |

**Gene expression significantly perturbed in response to GM+I (fold change = GM+I/Control)**

| Gene ID      | Gene Symbol                    | Gene ID            | Gene Name                                                                                                                  | Fold Change | q-value (%) |
|--------------|--------------------------------|--------------------|----------------------------------------------------------------------------------------------------------------------------|-------------|-------------|
| 1554915_a_at | <b>2'-PDE</b>                  | 201626             | 2'-phosphodiesterase                                                                                                       | 6.83        | 0.06        |
| 205986_at    | <b>AATK</b>                    | 9625               | apoptosis-associated tyrosine kinase<br>ATP-binding cassette, sub-family A (ABC1),                                         | -2.11       | 0.16        |
| 203504_s_at  | <b>ABCA1</b>                   | 19                 | member 1<br>ATP-binding cassette, sub-family A (ABC1),                                                                     | -3.33       | 0.13        |
| 217504_at    | <b>ABCA6</b>                   | 23460              | member 6<br>ATP-binding cassette, sub-family A (ABC1),                                                                     | 2.09        | 0.06        |
| 219577_s_at  | <b>ABCA7</b>                   | 10347              | member 7<br>ATP-binding cassette, sub-family C (CFTR/MRP),                                                                 | -12.01      | 0.13        |
| 202805_s_at  | <b>ABCC1</b>                   | 4363               | member 1<br>ATP-binding cassette, sub-family C (CFTR/MRP),                                                                 | 5.19        | 0.00        |
| 226363_at    | <b>ABCC5</b>                   | 10057              | member 5<br>ATP-binding cassette, sub-family E (OABP),<br>member 1 /// similar to ATP-binding cassette sub-                | -12.13      | 0.03        |
| 201872_s_at  | <b>ABCE1 ///<br/>LOC647150</b> | 6059 ///<br>647150 | family E member 1 (RNase L inhibitor)<br>(Ribonuclease 4 inhibitor) (RNS4I)<br>ATP-binding cassette, sub-family F (GCN20), | 8.02        | 0.13        |
| 200045_at    | <b>ABCF1</b>                   | 23                 | member 1<br>ATP-binding cassette, sub-family G (WHITE),                                                                    | 11.50       | 0.02        |
| 211113_s_at  | <b>ABCG1</b>                   | 9619               | member 1                                                                                                                   | -2.64       | 0.13        |
| 237974_at    | <b>ABHD12B</b>                 | 145447             | abhydrolase domain containing 12B                                                                                          | -20.05      | 0.08        |
| 235348_at    | <b>ABHD13</b>                  | 84945              | abhydrolase domain containing 13                                                                                           | -2.91       | 0.51        |
| 225337_at    | <b>ABHD2</b>                   | 11057              | abhydrolase domain containing 2                                                                                            | -2.19       | 0.00        |
| 213017_at    | <b>ABHD3</b>                   | 171586             | abhydrolase domain containing 3                                                                                            | -5.28       | 0.07        |
| 242023_at    | <b>ABHD4</b>                   | 63874              | Abhydrolase domain containing 4                                                                                            | -2.09       | 0.08        |
| 218739_at    | <b>ABHD5</b>                   | 51099              | abhydrolase domain containing 5                                                                                            | -7.14       | 0.00        |
| 227631_at    | <b>ABI2</b>                    | 10152              | Abl interactor 2<br>v-abl Abelson murine leukemia viral oncogene                                                           | 2.29        | 0.34        |
| 231907_at    | <b>ABL2</b>                    | 27                 | homolog 2 (arg, Abelson-related gene)<br>ankyrin repeat and BTB (POZ) domain containing                                    | 6.03        | 0.08        |
| 229164_s_at  | <b>ABTB1</b>                   | 80325              | 1<br>acetyl-Coenzyme A acetyltransferase 2                                                                                 | -10.32      | 0.00        |
| 209608_s_at  | <b>ACAT2</b>                   | 39                 | (acetoacetyl Coenzyme A thiolase)                                                                                          | 3.09        | 0.02        |
| 207561_s_at  | <b>ACCN3</b>                   | 9311               | amiloride-sensitive cation channel 3                                                                                       | -2.73       | 0.51        |
| 218981_at    | <b>ACN9</b>                    | 57001              | ACN9 homolog (S. cerevisiae)                                                                                               | 5.87        | 0.08        |
| 216103_at    | <b>ACOT11</b>                  | 26027              | acyl-CoA thioesterase 11                                                                                                   | 2.09        | 0.34        |
| 221641_s_at  | <b>ACOT9</b>                   | 23597              | acyl-CoA thioesterase 9                                                                                                    | 2.16        | 0.06        |
| 227962_at    | <b>ACOX1</b>                   | 51                 | acyl-Coenzyme A oxidase 1, palmitoyl                                                                                       | -6.83       | 0.00        |
| 215227_x_at  | <b>ACP1</b>                    | 52                 | acid phosphatase 1, soluble                                                                                                | -2.14       | 0.51        |
| 237030_at    | <b>ACPP</b>                    | 55                 | acid phosphatase, prostate                                                                                                 | -3.72       | 0.34        |
| 238825_at    | <b>ACRC</b>                    | 93953              | acidic repeat containing                                                                                                   | -4.10       | 0.13        |

|             |                  |                                                                                                    |        |      |
|-------------|------------------|----------------------------------------------------------------------------------------------------|--------|------|
| 222592_s_at | <b>ACSL5</b>     | 51703 acyl-CoA synthetase long-chain family member 5                                               | 40.39  | 0.00 |
| 208637_x_at | <b>ACTN1</b>     | 87 actinin, alpha 1                                                                                | -4.98  | 0.00 |
| 203861_s_at | <b>ACTN2</b>     | 88 actinin, alpha 2                                                                                | -2.75  | 0.08 |
| 200601_at   | <b>ACTN4</b>     | 81 actinin, alpha 4                                                                                | -2.79  | 0.25 |
| 226950_at   | <b>ACVRL1</b>    | 94 activin A receptor type II-like 1                                                               | 10.61  | 0.00 |
| 225421_at   | <b>ACY1L2</b>    | 135293 aminoacylase 1-like 2                                                                       | 2.69   | 0.34 |
| 209765_at   | <b>ADAM19</b>    | 8728 ADAM metalloproteinase domain 19 (meltrin beta)                                               | -11.07 | 0.00 |
| 205997_at   | <b>ADAM28</b>    | 10863 ADAM metalloproteinase domain 28<br>ADAM metalloproteinase domain 9 (meltrin                 | -3.29  | 0.79 |
| 202381_at   | <b>ADAM9</b>     | 8754 gamma)<br>ADAM metalloproteinase with thrombospondin                                          | 2.59   | 0.08 |
| 230167_at   | <b>ADAMTS14</b>  | 140766 type 1 motif, 14                                                                            | 2.31   | 0.79 |
| 205882_x_at | <b>ADD3</b>      | 120 adducin 3 (gamma)                                                                              | -6.78  | 0.00 |
| 209122_at   | <b>ADFP</b>      | 123 adipose differentiation-related protein<br>alcohol dehydrogenase 5 (class III), chi            | 9.74   | 0.00 |
| 208848_at   | <b>ADH5</b>      | 128 polypeptide                                                                                    | 2.12   | 0.51 |
| 203322_at   | <b>ADNP2</b>     | 22850 ADNP homeobox 2                                                                              | 2.78   | 0.13 |
| 205013_s_at | <b>ADORA2A</b>   | 135 adenosine A2a receptor                                                                         | 9.36   | 0.00 |
| 228042_at   | <b>ADPRH</b>     | 141 ADP-ribosylarginine hydrolase                                                                  | 5.26   | 0.06 |
| 206170_at   | <b>ADRB2</b>     | 154 adrenergic, beta-2-, receptor, surface                                                         | -5.84  | 0.03 |
| 225229_at   | <b>AFF4</b>      | 27125 AF4/FMR2 family, member 4<br>advanced glycosylation end product-specific                     | 2.23   | 0.02 |
| 217046_s_at | <b>AGER</b>      | 177 receptor<br>1-acylglycerol-3-phosphate O-acyltransferase 6                                     | -2.71  | 0.00 |
| 224776_at   | <b>AGPAT6</b>    | 137964 (lysophosphatidic acid acyltransferase, zeta)                                               | 2.05   | 0.34 |
| 204500_s_at | <b>AGTPBP1</b>   | 23287 ATP/GTP binding protein 1                                                                    | -5.18  | 0.00 |
| 214766_s_at | <b>AHCTF1</b>    | 25909 AT hook containing transcription factor 1<br>apoptosis-inducing factor, mitochondrion-       | -4.65  | 0.00 |
| 228445_at   | <b>AIFM2</b>     | 84883 associated, 2                                                                                | 2.15   | 0.34 |
| 223136_at   | <b>AIG1</b>      | 51390 androgen-induced 1                                                                           | 5.91   | 0.00 |
| 206513_at   | <b>AIM2</b>      | 9447 absent in melanoma 2                                                                          | 2.13   | 0.25 |
| 212175_s_at | <b>AK2</b>       | 204 adenylate kinase 2                                                                             | 2.83   | 0.00 |
|             | <b>AK3L1 ///</b> | 205 ///<br>adenylate kinase 3-like 1 ///<br>adenylate kinase 3-                                    |        |      |
|             | <b>AK3L2 ///</b> | 387851 ///<br>like 2 ///<br>similar to Adenylate kinase isoenzyme 4,                               |        |      |
| 204348_s_at | <b>LOC645619</b> | 645619 mitochondrial (ATP-AMP transphosphorylase)                                                  | 21.76  | 0.51 |
| 225342_at   | <b>AK3L2</b>     | 387851 adenylate kinase 3-like 2                                                                   | 6.00   | 0.00 |
| 205045_at   | <b>AKAP10</b>    | 11216 A kinase (PRKA) anchor protein 10                                                            | -2.44  | 0.00 |
|             | <b>AKAP2 ///</b> |                                                                                                    |        |      |
|             | <b>PALM2-</b>    | 11217 ///<br>A kinase (PRKA) anchor protein 2 ///<br>PALM2-                                        |        |      |
| 202760_s_at | <b>AKAP2</b>     | 445815 AKAP2 protein                                                                               | 9.74   | 0.02 |
| 225701_at   | <b>AKNA</b>      | 80709 AT-hook transcription factor<br>aldo-keto reductase family 1, member A1                      | -2.79  | 0.00 |
| 201900_s_at | <b>AKR1A1</b>    | 10327 (aldehyde reductase)                                                                         | 30.30  | 0.02 |
| 207163_s_at | <b>AKT1</b>      | 207 v-akt murine thymoma viral oncogene homolog 1<br>V-akt murine thymoma viral oncogene homolog 3 | -7.66  | 0.51 |
| 212609_s_at | <b>AKT3</b>      | 10000 (protein kinase B, gamma)                                                                    | 2.95   | 0.25 |
| 218373_at   | <b>AKTIP</b>     | 64400 AKT interacting protein                                                                      | -5.31  | 0.03 |
| 201952_at   | <b>ALCAM</b>     | 214 activated leukocyte cell adhesion molecule                                                     | 2.91   | 0.34 |
| 207016_s_at | <b>ALDH1A2</b>   | 8854 aldehyde dehydrogenase 1 family, member A2                                                    | 51.08  | 0.06 |
| 201612_at   | <b>ALDH9A1</b>   | 223 aldehyde dehydrogenase 9 family, member A1                                                     | -2.04  | 0.13 |
| 207381_at   | <b>ALOX12B</b>   | 242 arachidonate 12-lipoxygenase, 12R type                                                         | 2.41   | 0.34 |
| 207328_at   | <b>ALOX15</b>    | 246 arachidonate 15-lipoxygenase                                                                   | -5.94  | 0.16 |
| 204446_s_at | <b>ALOX5</b>     | 240 arachidonate 5-lipoxygenase                                                                    | -3.42  | 0.00 |
| 215783_s_at | <b>ALPL</b>      | 249 alkaline phosphatase, liver/bone/kidney                                                        | -76.74 | 0.00 |

|             |                  |            |                                                                                                                           |        |      |
|-------------|------------------|------------|---------------------------------------------------------------------------------------------------------------------------|--------|------|
| 226431_at   | <b>ALS2CR13</b>  | 150864     | amyotrophic lateral sclerosis 2 (juvenile)<br>chromosome region, candidate 13                                             | -13.77 | 0.51 |
| 228094_at   | <b>AMICA1</b>    | 120425     | 1<br>adhesion molecule, interacts with CXADR antigen                                                                      | -13.48 | 0.00 |
| 212360_at   | <b>AMPD2</b>     | 271        | L)<br>adenosine monophosphate deaminase 2 (isoform                                                                        | -4.05  | 0.00 |
|             | <b>AMY1A</b> /// | 276 ///    | amylase, alpha 1A (salivary) ///                                                                                          |        |      |
|             | <b>AMY1B</b> /// | 277 ///    | (salivary) ///                                                                                                            |        |      |
|             | <b>AMY1C</b> /// | 278 ///    | amylase, alpha 1C (salivary) ///                                                                                          |        |      |
|             | <b>AMY2A</b> /// | 279 ///    | amylase, alpha 2A (pancreatic) ///                                                                                        |        |      |
|             | <b>AMY2B</b> /// | 280 ///    | 2B (pancreatic) ///                                                                                                       |        |      |
| 208498_s_at | <b>LOC730924</b> | 730924     | similar to Pancreatic alpha-<br>amylase precursor (PA) (1,4-alpha-D-glucan<br>glucanohydrolase)                           | -4.13  | 0.34 |
| 231973_s_at | <b>ANAPC1</b>    | 64682      | anaphase promoting complex subunit 1                                                                                      | -7.38  | 0.34 |
| 238642_at   | <b>ANKRD13D</b>  | 338692     | ankyrin repeat domain 13 family, member D                                                                                 | -7.53  | 0.79 |
| 231423_s_at | <b>ANKRD16</b>   | 54522      | ankyrin repeat domain 16                                                                                                  | 2.24   | 0.13 |
| 238439_at   | <b>ANKRD22</b>   | 118932     | ankyrin repeat domain 22                                                                                                  | 34.47  | 0.00 |
| 211717_at   | <b>ANKRD40</b>   | 91369      | ankyrin repeat domain 40                                                                                                  | 5.41   | 0.34 |
| 219496_at   | <b>ANKRD57</b>   | 65124      | ankyrin repeat domain 57                                                                                                  | 2.12   | 0.34 |
|             |                  |            | ankyrin repeat and sterile alpha motif domain                                                                             |        |      |
| 238626_at   | <b>ANKS6</b>     | 203286     | containing 6                                                                                                              | -3.11  | 0.03 |
|             |                  |            | ankyrin repeat and zinc finger domain containing                                                                          |        |      |
| 218274_s_at | <b>ANKZF1</b>    | 55139      | 1<br>acidic (leucine-rich) nuclear phosphoprotein 32                                                                      | -2.66  | 0.34 |
| 208103_s_at | <b>ANP32E</b>    | 81611      | family, member E<br>alanyl (membrane) aminopeptidase<br>(aminopeptidase N, aminopeptidase M,                              | 2.46   | 0.00 |
| 202888_s_at | <b>ANPEP</b>     | 290        | microsomal aminopeptidase, CD13, p150)                                                                                    | -5.15  | 0.03 |
| 225524_at   | <b>ANTXR2</b>    | 118429     | anthrax toxin receptor 2                                                                                                  | -2.13  | 0.51 |
| 244206_at   | <b>ANUBL1</b>    | 93550      | AN1, ubiquitin-like, homolog ( <i>Xenopus laevis</i> )                                                                    | 2.07   | 0.25 |
| 214783_s_at | <b>ANXA11</b>    | 311        | annexin A11                                                                                                               | -6.19  | 0.07 |
| 201590_x_at | <b>ANXA2</b>     | 302        | annexin A2                                                                                                                | 4.73   | 0.06 |
| 208816_x_at | <b>ANXA2P2</b>   | 304        | annexin A2 pseudogene 2                                                                                                   | 6.81   | 0.00 |
| 211241_at   | <b>ANXA2P3</b>   | 305        | annexin A2 pseudogene 3                                                                                                   | 2.37   | 0.79 |
| 209369_at   | <b>ANXA3</b>     | 306        | annexin A3                                                                                                                | -2.68  | 0.25 |
| 201301_s_at | <b>ANXA4</b>     | 307        | annexin A4                                                                                                                | 3.32   | 0.08 |
| 200782_at   | <b>ANXA5</b>     | 308        | annexin A5                                                                                                                | 4.31   | 0.00 |
| 201366_at   | <b>ANXA7</b>     | 310        | annexin A7                                                                                                                | 2.94   | 0.00 |
| 205639_at   | <b>AOAH</b>      | 313        | acyloxyacyl hydrolase (neutrophil)<br>amine oxidase, copper containing 3 (vascular                                        | -3.76  | 0.08 |
| 204894_s_at | <b>AOC3</b>      | 8639       | adhesion protein 1)<br>adaptor-related protein complex 1, sigma 3                                                         | -5.14  | 0.25 |
| 237159_x_at | <b>AP1S3</b>     | 130340     | subunit                                                                                                                   | 21.83  | 0.02 |
| 204859_s_at | <b>APAF1</b>     | 317        | apoptotic peptidase activating factor 1<br>amyloid beta (A4) precursor protein-binding,                                   | -2.74  | 0.00 |
| 230925_at   | <b>APBB1IP</b>   | 54518      | family B, member 1 interacting protein<br>amyloid beta (A4) precursor protein-binding,                                    | -2.14  | 0.00 |
| 204650_s_at | <b>APBB3</b>     | 10307      | family B, member 3                                                                                                        | -3.59  | 0.79 |
| 219465_at   | <b>APOA2</b>     | 336        | apolipoprotein A-II                                                                                                       | 5.44   | 0.51 |
| 220023_at   | <b>APOB48R</b>   | 55911      | apolipoprotein B48 receptor<br>apolipoprotein B mRNA editing enzyme, catalytic                                            | -2.73  | 0.16 |
| 214994_at   | <b>APOBEC3F</b>  | 200316     | polypeptide-like 3F                                                                                                       | 4.34   | 0.06 |
|             | <b>APOBEC3F</b>  |            | apolipoprotein B mRNA editing enzyme, catalytic                                                                           |        |      |
|             | ///              | 200316 /// | polypeptide-like 3G ///                                                                                                   |        |      |
| 214995_s_at | <b>APOBEC3G</b>  | 60489      | apolipoprotein B mRNA<br>editing enzyme, catalytic polypeptide-like 3F<br>apolipoprotein B mRNA editing enzyme, catalytic | 6.77   | 0.51 |
| 204205_at   | <b>APOBEC3G</b>  | 60489      | polypeptide-like 3G                                                                                                       | 4.03   | 0.00 |
|             | <b>APOC2</b> /// | 344 ///    |                                                                                                                           |        |      |
| 204561_x_at | <b>APOC4</b>     | 346        | apolipoprotein C-II ///                                                                                                   | -2.16  | 0.07 |
|             |                  |            | apolipoprotein C-IV                                                                                                       |        |      |

|             |                  |                                                             |        |      |
|-------------|------------------|-------------------------------------------------------------|--------|------|
| 209546_s_at | <b>APOL1</b>     | 8542 apolipoprotein L, 1                                    | 4.76   | 0.00 |
| 221087_s_at | <b>APOL3</b>     | 80833 apolipoprotein L, 3                                   | 22.98  | 0.00 |
| 223801_s_at | <b>APOL4</b>     | 80832 apolipoprotein L, 4                                   | 18.41  | 0.00 |
| 219716_at   | <b>APOL6</b>     | 80830 apolipoprotein L, 6                                   | 4.66   | 0.00 |
| 221620_s_at | <b>APOO</b>      | 79135 apolipoprotein O                                      | 9.62   | 0.51 |
| 244187_at   | <b>APOOL</b>     | 139322 Apolipoprotein O-like                                | 2.21   | 0.79 |
| 218527_at   | <b>APTX</b>      | 54840 aprataxin                                             | 3.82   | 0.08 |
| 39248_at    | <b>AQP3</b>      | 360 aquaporin 3 (Gill blood group)                          | 19.97  | 0.34 |
| 201176_s_at | <b>ARCN1</b>     | 372 archain 1                                               | 2.15   | 0.34 |
| 201096_s_at | <b>ARF4</b>      | 378 ADP-ribosylation factor 4                               | 3.57   | 0.00 |
|             |                  | ADP-ribosylation factor guanine nucleotide-                 |        |      |
| 222518_at   | <b>ARFGEF2</b>   | 10564 exchange factor 2 (brefeldin A-inhibited)             | 5.13   | 0.00 |
|             |                  | ADP-ribosylation factor interacting protein 1               |        |      |
| 218230_at   | <b>ARFIP1</b>    | 27236 (arfaptin 1)                                          | 2.05   | 0.00 |
|             |                  | ADP-ribosylation factor interacting protein 2               |        |      |
| 202109_at   | <b>ARFIP2</b>    | 23647 (arfaptin 2)                                          | 2.25   | 0.16 |
| 206177_s_at | <b>ARG1</b>      | 383 arginase, liver                                         | -3.21  | 0.79 |
| 218870_at   | <b>ARHGAP15</b>  | 55843 Rho GTPase activating protein 15                      | -5.37  | 0.16 |
| 225173_at   | <b>ARHGAP18</b>  | 93663 Rho GTPase activating protein 18                      | 4.34   | 0.00 |
| 37577_at    | <b>ARHGAP19</b>  | 84986 Rho GTPase activating protein 19                      | -13.06 | 0.13 |
| 205069_s_at | <b>ARHGAP26</b>  | 23092 Rho GTPase activating protein 26                      | -4.66  | 0.03 |
| 225618_at   | <b>ARHGAP27</b>  | 201176 Rho GTPase activating protein 27                     | -2.16  | 0.03 |
| 204425_at   | <b>ARHGAP4</b>   | 393 Rho GTPase activating protein 4                         | -5.42  | 0.08 |
| 213606_s_at | <b>ARHGDI A</b>  | 396 Rho GDP dissociation inhibitor (GDI) alpha              | 5.48   | 0.00 |
| 201288_at   | <b>ARHGDI B</b>  | 397 Rho GDP dissociation inhibitor (GDI) beta               | -2.78  | 0.00 |
|             |                  | Rho guanine nucleotide exchange factor (GEF) 10-            |        |      |
| 221656_s_at | <b>ARHGEF10L</b> | 55160 like                                                  | 6.94   | 0.06 |
| 238730_at   | <b>ARHGEF11</b>  | 9826 Rho guanine nucleotide exchange factor (GEF) 11        | 2.40   | 0.13 |
|             |                  | rho/rac guanine nucleotide exchange factor (GEF)            |        |      |
| 213039_at   | <b>ARHGEF18</b>  | 23370 18                                                    | -3.31  | 0.34 |
| 218501_at   | <b>ARHGEF3</b>   | 50650 Rho guanine nucleotide exchange factor (GEF) 3        | 3.69   | 0.34 |
|             |                  | Rac/Cdc42 guanine nucleotide exchange factor                |        |      |
| 209539_at   | <b>ARHGEF6</b>   | 9459 (GEF) 6                                                | -8.39  | 0.07 |
| 218917_s_at | <b>ARID1A</b>    | 8289 AT rich interactive domain 1A (SWI-like)               | -2.76  | 0.25 |
| 233339_s_at | <b>ARID1B</b>    | 57492 AT rich interactive domain 1B (SWI1-like)             | -2.87  | 0.79 |
| 205062_x_at | <b>ARID4A</b>    | 5926 AT rich interactive domain 4A (RBP1-like)              | -3.13  | 0.00 |
| 224322_at   | <b>ARID4B</b>    | 51742 AT rich interactive domain 4B (RBP1-like)             | -2.32  | 0.25 |
| 212614_at   | <b>ARID5B</b>    | 84159 AT rich interactive domain 5B (MRF1-like)             | 8.05   | 0.25 |
| 201659_s_at | <b>ARL1</b>      | 400 ADP-ribosylation factor-like 1                          | 2.46   | 0.13 |
| 202564_x_at | <b>ARL2</b>      | 402 ADP-ribosylation factor-like 2                          | 12.12  | 0.51 |
| 202641_at   | <b>ARL3</b>      | 403 ADP-ribosylation factor-like 3                          | -6.33  | 0.07 |
| 205020_s_at | <b>ARL4A</b>     | 10124 ADP-ribosylation factor-like 4A                       | 2.06   | 0.51 |
| 242727_at   | <b>ARL5B</b>     | 221079 ADP-ribosylation factor-like 5B                      | 23.77  | 0.00 |
| 225707_at   | <b>ARL6IP6</b>   | 151188 ADP-ribosylation-like factor 6 interacting protein 6 | -3.05  | 0.13 |
| 222442_s_at | <b>ARL8B</b>     | 55207 ADP-ribosylation factor-like 8B                       | 4.21   | 0.00 |
| 217858_s_at | <b>ARMCX3</b>    | 51566 armadillo repeat containing, X-linked 3               | 5.07   | 0.00 |
| 214749_s_at | <b>ARMCX6</b>    | 54470 armadillo repeat containing, X-linked 6               | 9.11   | 0.34 |
| 202655_at   | <b>ARMET</b>     | 7873 arginine-rich, mutated in early stage tumors           | 2.44   | 0.02 |
| 209824_s_at | <b>ARNTL</b>     | 406 aryl hydrocarbon receptor nuclear translocator-like     | -3.33  | 0.51 |
|             |                  | aryl hydrocarbon receptor nuclear translocator-like         |        |      |
| 220658_s_at | <b>ARNTL2</b>    | 56938 2                                                     | 3.77   | 0.51 |
| 226405_s_at | <b>ARRDC1</b>    | 92714 arrestin domain containing 1                          | -3.18  | 0.51 |
| 226055_at   | <b>ARRDC2</b>    | 27106 arrestin domain containing 2                          | 4.12   | 0.25 |
| 224797_at   | <b>ARRDC3</b>    | 57561 arrestin domain containing 3                          | -5.13  | 0.00 |



|              |                  |                                                                                                                                             |        |      |
|--------------|------------------|---------------------------------------------------------------------------------------------------------------------------------------------|--------|------|
| 232197_x_at  | <b>ARSB</b>      | 411 arylsulfatase B                                                                                                                         | 2.97   | 0.51 |
| 1552632_a_at | <b>ARSG</b>      | 22901 arylsulfatase G<br>N-acylsphingosine amidohydrolase (acid                                                                             | -6.64  | 0.08 |
| 227135_at    | <b>ASAH1</b>     | 27163 ceramidase)-like                                                                                                                      | -3.15  | 0.08 |
| 226861_at    | <b>ASB8</b>      | 140461 ankyrin repeat and SOCS box-containing 8                                                                                             | -2.29  | 0.00 |
| 1554627_a_at | <b>ASCC1</b>     | 51008 activating signal cointegrator 1 complex subunit 1                                                                                    | 2.51   | 0.13 |
| 212815_at    | <b>ASCC3</b>     | 10973 activating signal cointegrator 1 complex subunit 3                                                                                    | 5.33   | 0.13 |
| 209985_s_at  | <b>ASCL1</b>     | 429 achaete-scute complex homolog 1 (Drosophila)                                                                                            | 2.06   | 0.25 |
| 227014_at    | <b>ASPHD2</b>    | 57168 aspartate beta-hydroxylase domain containing 2                                                                                        | 10.31  | 0.00 |
| 224850_at    | <b>ATAD1</b>     | 84896 ATPase family, AAA domain containing 1                                                                                                | 3.68   | 0.00 |
| 1558233_s_at | <b>ATF1</b>      | 466 activating transcription factor 1                                                                                                       | 2.18   | 0.34 |
| 202672_s_at  | <b>ATF3</b>      | 467 activating transcription factor 3                                                                                                       | 26.33  | 0.00 |
| 204998_s_at  | <b>ATF5</b>      | 22809 activating transcription factor 5                                                                                                     | 21.26  | 0.00 |
| 226941_at    | <b>ATF6</b>      | 22926 activating transcription factor 6                                                                                                     | -3.20  | 0.00 |
| 229389_at    | <b>ATG16L2</b>   | 89849 ATG16 autophagy related 16-like 2 (S. cerevisiae)<br>ATG5 autophagy related 5 homolog (S.                                             | -10.15 | 0.00 |
| 202511_s_at  | <b>ATG5</b>      | 9474 cerevisiae)<br>ATG7 autophagy related 7 homolog (S.                                                                                    | 2.96   | 0.16 |
| 218673_s_at  | <b>ATG7</b>      | 10533 cerevisiae)<br>ATG9 autophagy related 9 homolog A (S.                                                                                 | 5.18   | 0.06 |
| 202492_at    | <b>ATG9A</b>     | 79065 cerevisiae)                                                                                                                           | -3.01  | 0.07 |
| 219359_at    | <b>ATHL1</b>     | 80162 ATH1, acid trehalase-like 1 (yeast)                                                                                                   | -7.45  | 0.00 |
| 208758_at    | <b>ATIC</b>      | 5-aminoimidazole-4-carboxamide ribonucleotide<br>471 formyltransferase/IMP cyclohydrolase                                                   | 5.14   | 0.34 |
| 212672_at    | <b>ATM</b>       | 472 ataxia telangiectasia mutated<br>ataxia telangiectasia mutated /// similar to Serine-                                                   | -2.81  | 0.08 |
| 208442_s_at  | <b>ATM ///</b>   | 472 /// protein kinase ATM (Ataxia telangiectasia                                                                                           |        |      |
| 203454_s_at  | <b>LOC651610</b> | 651610 mutated) (A-T, mutated)                                                                                                              | -3.04  | 0.25 |
| 213238_at    | <b>ATOX1</b>     | 475 ATX1 antioxidant protein 1 homolog (yeast)                                                                                              | 4.76   | 0.00 |
| 1564064_a_at | <b>ATP10D</b>    | 57205 ATPase, Class V, type 10D                                                                                                             | 3.26   | 0.00 |
| 219558_at    | <b>ATP11B</b>    | 23200 ATPase, Class VI, type 11B                                                                                                            | -2.02  | 0.00 |
|              | <b>ATP13A3</b>   | 79572 ATPase type 13A3                                                                                                                      | 5.67   | 0.00 |
| 220948_s_at  | <b>ATP1A1</b>    | 476 ATPase, Na <sup>+</sup> /K <sup>+</sup> transporting, alpha 1 polypeptide                                                               | 4.55   | 0.00 |
| 201243_s_at  | <b>ATP1B1</b>    | 481 ATPase, Na <sup>+</sup> /K <sup>+</sup> transporting, beta 1 polypeptide                                                                | 28.54  | 0.02 |
| 208836_at    | <b>ATP1B3</b>    | 483 ATPase, Na <sup>+</sup> /K <sup>+</sup> transporting, beta 3 polypeptide<br>ATPase, Ca <sup>++</sup> transporting, cardiac muscle, slow | 10.48  | 0.00 |
| 209186_at    | <b>ATP2A2</b>    | 488 twitch 2                                                                                                                                | 4.18   | 0.00 |
| 213036_x_at  | <b>ATP2A3</b>    | 489 ATPase, Ca <sup>++</sup> transporting, ubiquitous                                                                                       | -2.93  | 0.34 |
| 212136_at    | <b>ATP2B4</b>    | 493 ATPase, Ca <sup>++</sup> transporting, plasma membrane 4                                                                                | -6.04  | 0.07 |
| 212255_s_at  | <b>ATP2C1</b>    | 27032 ATPase, Ca <sup>++</sup> transporting, type 2C, member 1<br>ATP synthase, H <sup>+</sup> transporting, mitochondrial F0               | 2.25   | 0.25 |
| 207508_at    | <b>ATP5G3</b>    | 518 complex, subunit C3 (subunit 9)<br>ATPase, H <sup>+</sup> transporting, lysosomal accessory                                             | 2.36   | 0.06 |
| 207809_s_at  | <b>ATP6AP1</b>   | 537 protein 1<br>ATPase, H <sup>+</sup> transporting, lysosomal accessory                                                                   | 2.60   | 0.08 |
| 201444_s_at  | <b>ATP6AP2</b>   | 10159 protein 2<br>ATPase, H <sup>+</sup> transporting, lysosomal 42kDa, V1                                                                 | 2.18   | 0.25 |
| 202872_at    | <b>ATP6V1C1</b>  | 528 subunit C1                                                                                                                              | 4.15   | 0.00 |

|              |                  |                                                                                                                  |       |      |
|--------------|------------------|------------------------------------------------------------------------------------------------------------------|-------|------|
| 208898_at    | <b>ATP6V1D</b>   | ATPase, H+ transporting, lysosomal 34kDa, V1<br>51382 subunit D                                                  | 2.83  | 0.00 |
| 201527_at    | <b>ATP6V1F</b>   | ATPase, H+ transporting, lysosomal 14kDa, V1<br>9296 subunit F                                                   | 3.30  | 0.02 |
| 208737_at    | <b>ATP6V1G1</b>  | ATPase, H+ transporting, lysosomal 13kDa, V1<br>9550 subunit G1                                                  | 4.43  | 0.00 |
| 221504_s_at  | <b>ATP6V1H</b>   | ATPase, H+ transporting, lysosomal 50/57kDa, V1<br>51606 subunit H                                               | 3.21  | 0.16 |
| 205197_s_at  | <b>ATP7A</b>     | ATPase, Cu++ transporting, alpha polypeptide<br>538 (Menkes syndrome)                                            | -2.27 | 0.34 |
| 204624_at    | <b>ATP7B</b>     | ATPase, Cu++ transporting, beta polypeptide<br>540                                                               | -4.54 | 0.79 |
| 209903_s_at  | <b>ATR</b>       | 545 ataxia telangiectasia and Rad3 related                                                                       | 5.46  | 0.16 |
| 1568706_s_at | <b>AVIL</b>      | 10677 Advillin                                                                                                   | -6.67 | 0.79 |
| 225557_at    | <b>AXUD1</b>     | 64651 AXIN1 up-regulated 1                                                                                       | 2.40  | 0.00 |
| 218043_s_at  | <b>AZI2</b>      | 64343 5-azacytidine induced 2                                                                                    | 3.20  | 0.79 |
| 201772_at    | <b>AZIN1</b>     | 51582 antizyme inhibitor 1                                                                                       | 3.94  | 0.00 |
| 225612_s_at  | <b>B3GNT5</b>    | UDP-GlcNAc:betaGal beta-1,3-N-<br>84002 acetylglucosaminyltransferase 5                                          | 3.19  | 0.00 |
| 212876_at    | <b>B4GALT4</b>   | UDP-Gal:betaGlcNAc beta 1,4-<br>8702 galactosyltransferase, polypeptide 4                                        | 4.59  | 0.00 |
| 217911_s_at  | <b>BAG3</b>      | 9531 BCL2-associated athanogene 3                                                                                | 2.69  | 0.25 |
| 227371_at    | <b>BAIAP2L1</b>  | 55971 BAI1-associated protein 2-like 1<br>brain abundant, membrane attached signal                               | 2.84  | 0.25 |
| 202391_at    | <b>BASP1</b>     | 10409 protein 1                                                                                                  | -3.31 | 0.00 |
| 205965_at    | <b>BATF</b>      | 10538 basic leucine zipper transcription factor, ATF-like<br>basic leucine zipper transcription factor, ATF-like | 6.33  | 0.08 |
| 228439_at    | <b>BATF2</b>     | 116071 2                                                                                                         | 31.13 | 0.00 |
| 203080_s_at  | <b>BAZ2B</b>     | 29994 bromodomain adjacent to zinc finger domain, 2B                                                             | -8.36 | 0.00 |
| 214452_at    | <b>BCAT1</b>     | 586 branched chain aminotransferase 1, cytosolic                                                                 | 26.81 | 0.16 |
| 227322_s_at  | <b>BCCIP</b>     | 56647 BRCA2 and CDKN1A interacting protein                                                                       | 4.12  | 0.16 |
| 212312_at    | <b>BCL2L1</b>    | 598 BCL2-like 1                                                                                                  | 5.40  | 0.06 |
| 227616_at    | <b>BCL9L</b>     | 283149 B-cell CLL/lymphoma 9-like                                                                                | 4.96  | 0.51 |
| 219433_at    | <b>BCOR</b>      | 54880 BCL6 co-repressor<br>basic helix-loop-helix domain containing, class B,                                    | 2.48  | 0.02 |
| 201170_s_at  | <b>BHLHB2</b>    | 8553 2<br>basic helix-loop-helix domain containing, class B,                                                     | 10.05 | 0.00 |
| 223185_s_at  | <b>BHLHB3</b>    | 79365 3                                                                                                          | 10.55 | 0.00 |
| 229437_at    | <b>BIC</b>       | 114614 BIC transcript                                                                                            | 33.31 | 0.00 |
| 213154_s_at  | <b>BICD2</b>     | 23299 bicaudal D homolog 2 (Drosophila)                                                                          | -2.78 | 0.00 |
| 219191_s_at  | <b>BIN2</b>      | 51411 bridging integrator 2                                                                                      | -2.07 | 0.00 |
| 210538_s_at  | <b>BIRC3</b>     | 330 baculoviral IAP repeat-containing 3                                                                          | 4.93  | 0.16 |
| 225859_at    | <b>BIRC4</b>     | 331 baculoviral IAP repeat-containing 4                                                                          | 2.98  | 0.00 |
| 229109_s_at  | <b>BLVRA</b>     | 644 Biliverdin reductase A                                                                                       | 4.03  | 0.06 |
| 226530_at    | <b>BMF</b>       | 90427 Bcl2 modifying factor                                                                                      | 3.88  | 0.25 |
| 226853_at    | <b>BMP2K</b>     | 55589 BMP2 inducible kinase<br>BCL2/adenovirus E1B 19kDa interacting protein 3-                                  | -3.93 | 0.25 |
| 221478_at    | <b>BNIP3L</b>    | 665 like                                                                                                         | -3.14 | 0.00 |
| 209836_x_at  | <b>BOLA2 ///</b> | 552900 /// bolA homolog 2 (E. coli) /// bolA homolog 2B (E.                                                      |       |      |
| 232909_s_at  | <b>BOLA2B</b>    | 654483 coli)                                                                                                     | 4.89  | 0.06 |
| 202427_s_at  | <b>BPTF</b>      | 2186 bromodomain PHD finger transcription factor                                                                 | -2.65 | 0.25 |
| 235156_at    | <b>BRP44</b>     | 25874 brain protein 44<br>bromodomain and WD repeat domain containing                                            | -4.05 | 0.79 |
| 201641_at    | <b>BRWD3</b>     | 254065 3                                                                                                         | -2.45 | 0.51 |
| 226963_at    | <b>BST2</b>      | 684 bone marrow stromal cell antigen 2                                                                           | 3.28  | 0.06 |
| 200921_s_at  | <b>BTF3L4</b>    | 91408 basic transcription factor 3-like 4                                                                        | 2.64  | 0.02 |
|              | <b>BTG1</b>      | 694 B-cell translocation gene 1, anti-proliferative                                                              | -2.79 | 0.00 |

|              |                     |                                                                       |        |      |
|--------------|---------------------|-----------------------------------------------------------------------|--------|------|
| 213134_x_at  | <b>BTG3</b>         | 10950 BTG family, member 3                                            | 55.79  | 0.16 |
| 215493_x_at  | <b>BTN2A1</b>       | 11120 butyrophilin, subfamily 2, member A1                            | 2.06   | 0.79 |
| 205298_s_at  | <b>BTN2A2</b>       | 10385 butyrophilin, subfamily 2, member A2                            | 4.41   | 0.13 |
| 209846_s_at  | <b>BTN3A2</b>       | 11118 butyrophilin, subfamily 3, member A2                            | 2.41   | 0.06 |
| 217207_s_at  | <b>BTNL3</b>        | 10917 butyrophilin-like 3                                             | -2.78  | 0.16 |
|              | <b>BTNL8</b> ///    | 653117 ///<br>butyrophilin-like 8 ///<br>similar to Butyrophilin-like |        |      |
| 220421_at    | <b>LOC653117</b>    | 79908 protein 8 precursor                                             | -4.51  | 0.51 |
| 225866_at    | <b>BXDC1</b>        | 84154 brix domain containing 1                                        | 23.07  | 0.00 |
| 219177_at    | <b>BXDC2</b>        | 55299 brix domain containing 2                                        | 3.32   | 0.34 |
| 218462_at    | <b>BXDC5</b>        | 80135 brix domain containing 5                                        | 2.89   | 0.13 |
| 224664_at    | <b>C10orf104</b>    | 119504 chromosome 10 open reading frame 104                           | 2.04   | 0.06 |
| 219844_at    | <b>C10orf118</b>    | 55088 chromosome 10 open reading frame 118                            | -2.71  | 0.51 |
| 218331_s_at  | <b>C10orf18</b>     | 54906 chromosome 10 open reading frame 18                             | 2.39   | 0.51 |
| 225192_at    | <b>C10orf46</b>     | 143384 chromosome 10 open reading frame 46                            | -3.31  | 0.00 |
| 225372_at    | <b>C10orf54</b>     | 64115 chromosome 10 open reading frame 54                             | -2.36  | 0.00 |
| 1557531_a_at | <b>C10orf55</b>     | 414236 chromosome 10 open reading frame 55                            | 35.15  | 0.00 |
| 218213_s_at  | <b>C11orf10</b>     | 746 chromosome 11 open reading frame 10                               | 2.81   | 0.06 |
|              | <b>C11orf17</b> /// | 56672 ///<br>chromosome 11 open reading frame 17 ///<br>NUAK          |        |      |
| 220987_s_at  | <b>NUAK2</b>        | 81788 family, SNF1-like kinase, 2                                     | -21.71 | 0.00 |
| 220560_at    | <b>C11orf21</b>     | 29125 chromosome 11 open reading frame 21                             | -9.72  | 0.51 |
| 224677_x_at  | <b>C11orf31</b>     | 280636 chromosome 11 open reading frame 31                            | 4.09   | 0.06 |
| 212560_at    | <b>C11orf32</b>     | 442871 chromosome 11 open reading frame 32                            | -16.81 | 0.00 |
| 229851_s_at  | <b>C11orf54</b>     | 28970 chromosome 11 open reading frame 54                             | -2.29  | 0.13 |
| 219806_s_at  | <b>C11orf75</b>     | 56935 chromosome 11 open reading frame 75                             | 14.18  | 0.00 |
| 224759_s_at  | <b>C12orf23</b>     | 90488 chromosome 12 open reading frame 23                             | 2.98   | 0.25 |
| 218374_s_at  | <b>C12orf4</b>      | 57102 chromosome 12 open reading frame 4                              | 8.50   | 0.00 |
| 226349_at    | <b>C12orf45</b>     | 121053 chromosome 12 open reading frame 45                            | 4.39   | 0.25 |
| 225772_s_at  | <b>C12orf62</b>     | 84987 chromosome 12 open reading frame 62                             | 3.18   | 0.51 |
| 218723_s_at  | <b>C13orf15</b>     | 28984 chromosome 13 open reading frame 15                             | 6.78   | 0.34 |
| 44790_s_at   | <b>C13orf18</b>     | 80183 chromosome 13 open reading frame 18                             | -6.61  | 0.00 |
| 228937_at    | <b>C13orf31</b>     | 144811 chromosome 13 open reading frame 31                            | 18.74  | 0.00 |
| 225675_at    | <b>C14orf101</b>    | 54916 chromosome 14 open reading frame 101                            | -3.92  | 0.79 |
| 219166_at    | <b>C14orf104</b>    | 55172 chromosome 14 open reading frame 104                            | 2.09   | 0.51 |
| 213246_at    | <b>C14orf109</b>    | 26175 chromosome 14 open reading frame 109                            | 3.99   | 0.02 |
| 229520_s_at  | <b>C14orf118</b>    | 55668 chromosome 14 open reading frame 118                            | 3.99   | 0.06 |
| 223060_at    | <b>C14orf119</b>    | 55017 chromosome 14 open reading frame 119                            | 2.27   | 0.00 |
| 218940_at    | <b>C14orf138</b>    | 79609 chromosome 14 open reading frame 138                            | -6.00  | 0.08 |
| 220107_s_at  | <b>C14orf140</b>    | 79696 chromosome 14 open reading frame 140                            | -2.12  | 0.00 |
| 221434_s_at  | <b>C14orf156</b>    | 81892 chromosome 14 open reading frame 156                            | 2.65   | 0.00 |
| 218298_s_at  | <b>C14orf159</b>    | 80017 chromosome 14 open reading frame 159                            | -2.51  | 0.34 |
| 217768_at    | <b>C14orf166</b>    | 51637 chromosome 14 open reading frame 166                            | 3.41   | 0.34 |
| 52741_at     | <b>C14orf172</b>    | 115708 chromosome 14 open reading frame 172                           | 2.04   | 0.16 |
| 225514_at    | <b>C14orf21</b>     | 161424 chromosome 14 open reading frame 21                            | 2.21   | 0.34 |
|              |                     | FCF1 small subunit (SSU) processome                                   |        |      |
|              | <b>C14orf32</b> /// | 51077 ///<br>component homolog (S. cerevisiae) ///<br>FCF1            |        |      |
| 212499_s_at  | <b>FCF1</b>         | 93487 chromosome 14 open reading frame 32                             | 2.59   | 0.51 |
| 227544_at    | <b>C14orf83</b>     | 161145 chromosome 14 open reading frame 83                            | 2.12   | 0.34 |
| 1563524_a_at | <b>C14orf85</b>     | 319085 chromosome 14 open reading frame 85                            | -20.80 | 0.25 |
| 218383_at    | <b>C14orf94</b>     | 54930 chromosome 14 open reading frame 94                             | -9.10  | 0.00 |
| 217915_s_at  | <b>C15orf15</b>     | 51187 chromosome 15 open reading frame 15                             | 2.13   | 0.06 |
| 242649_x_at  | <b>C15orf21</b>     | 283651 chromosome 15 open reading frame 21                            | 4.81   | 0.79 |
| 223484_at    | <b>C15orf48</b>     | 84419 chromosome 15 open reading frame 48                             | 351.48 | 0.00 |
| 229908_s_at  | <b>C16orf28</b>     | 65259 chromosome 16 open reading frame 28                             | 2.12   | 0.00 |
|              | <b>C16orf54</b> /// |                                                                       |        |      |
|              | <b>hCG_164488</b>   | 283897 ///<br>chromosome 16 open reading frame 54 ///<br>similar      |        |      |
| 1559584_a_at | <b>4</b>            | 728070 to chromosome 16 open reading frame 54                         | -5.09  | 0.00 |

|              |                  |                                                        |        |      |
|--------------|------------------|--------------------------------------------------------|--------|------|
| 218447_at    | <b>C16orf61</b>  | 56942 chromosome 16 open reading frame 61              | 15.55  | 0.00 |
| 225088_at    | <b>C16orf63</b>  | 123811 chromosome 16 open reading frame 63             | 3.04   | 0.06 |
| 225374_at    | <b>C17orf32</b>  | 147007 chromosome 17 open reading frame 32             | 2.76   | 0.13 |
| 227668_at    | <b>C17orf56</b>  | 146705 chromosome 17 open reading frame 56             | -2.51  | 0.16 |
| 218464_s_at  | <b>C17orf63</b>  | 55731 chromosome 17 open reading frame 63              | 2.32   | 0.34 |
| 221621_at    | <b>C17orf86</b>  | 654434 chromosome 17 open reading frame 86             | 2.82   | 0.34 |
| 225967_s_at  | <b>C17orf89</b>  | 284184 chromosome 17 open reading frame 89             | 3.01   | 0.08 |
| 227881_s_at  | <b>C18orf17</b>  | 125488 Chromosome 18 open reading frame 17             | 2.43   | 0.16 |
| 235022_at    | <b>C18orf19</b>  | 125228 chromosome 18 open reading frame 19             | 7.08   | 0.51 |
| 1553934_at   | <b>C18orf20</b>  | 221241 chromosome 18 open reading frame 20             | 2.42   | 0.51 |
| 229582_at    | <b>C18orf37</b>  | 125476 chromosome 18 open reading frame 37             | 2.11   | 0.25 |
| 1570552_at   | <b>C18orf50</b>  | 619463 chromosome 18 open reading frame 50             | 5.80   | 0.06 |
| 221739_at    | <b>C19orf10</b>  | 56005 chromosome 19 open reading frame 10              | 9.48   | 0.25 |
| 223983_s_at  | <b>C19orf12</b>  | 83636 chromosome 19 open reading frame 12              | 5.66   | 0.34 |
| 55705_at     | <b>C19orf22</b>  | 91300 chromosome 19 open reading frame 22              | -2.67  | 0.00 |
| 220178_at    | <b>C19orf28</b>  | 126321 chromosome 19 open reading frame 28             | 3.79   | 0.08 |
| 228154_at    | <b>C19orf44</b>  | 84167 chromosome 19 open reading frame 44              | 2.85   | 0.06 |
| 204700_x_at  | <b>C1orf107</b>  | 27042 chromosome 1 open reading frame 107              | 12.63  | 0.16 |
| 212004_at    | <b>C1orf144</b>  | 26099 chromosome 1 open reading frame 144              | 3.71   | 0.13 |
| 241809_at    | <b>C1orf183</b>  | 55924 chromosome 1 open reading frame 183              | -13.72 | 0.00 |
| 1559638_at   | <b>C1orf200</b>  | 644997 chromosome 1 open reading frame 200             | 2.27   | 0.06 |
| 1559376_at   | <b>C1orf203</b>  | 84852 chromosome 1 open reading frame 203              | 4.06   | 0.00 |
| 1556633_at   | <b>C1orf204</b>  | 284677 chromosome 1 open reading frame 204             | 2.27   | 0.51 |
| 225404_at    | <b>C1orf212</b>  | 113444 chromosome 1 open reading frame 212             | 2.11   | 0.51 |
| 212791_at    | <b>C1orf216</b>  | 127703 chromosome 1 open reading frame 216             | 13.68  | 0.51 |
| 225638_at    | <b>C1orf31</b>   | 388753 chromosome 1 open reading frame 31              | 11.89  | 0.00 |
| 1555226_s_at | <b>C1orf43</b>   | 25912 chromosome 1 open reading frame 43               | 2.20   | 0.00 |
| 219506_at    | <b>C1orf54</b>   | 79630 chromosome 1 open reading frame 54               | 20.40  | 0.16 |
| 244103_at    | <b>C1orf55</b>   | 163859 chromosome 1 open reading frame 55              | 2.20   | 0.06 |
| 221222_s_at  | <b>C1orf56</b>   | 54964 chromosome 1 open reading frame 56               | -3.83  | 0.13 |
| 225841_at    | <b>C1orf59</b>   | 113802 chromosome 1 open reading frame 59              | -6.29  | 0.13 |
| 205103_at    | <b>C1orf61</b>   | 10485 chromosome 1 open reading frame 61               | 6.26   | 0.16 |
| 209007_s_at  | <b>C1orf63</b>   | 57035 chromosome 1 open reading frame 63               | -2.00  | 0.07 |
| 1554660_a_at | <b>C1orf71</b>   | 163882 chromosome 1 open reading frame 71              | 3.11   | 0.51 |
| 231835_at    | <b>C1orf93</b>   | 127281 chromosome 1 open reading frame 93              | 4.22   | 0.13 |
| 225904_at    | <b>C1orf96</b>   | 126731 chromosome 1 open reading frame 96              | -2.54  | 0.03 |
| 202953_at    | <b>C1QB</b>      | 713 chain<br>complement component 1, q subcomponent, B | 9.16   | 0.51 |
| 214214_s_at  | <b>C1QBP</b>     | 708 binding protein                                    | 3.58   | 0.25 |
| 239349_at    | <b>C1QTNF7</b>   | 114905 C1q and tumor necrosis factor related protein 7 | 4.58   | 0.25 |
| 218983_at    | <b>C1RL</b>      | 51279 complement component 1, r subcomponent-like      | -2.80  | 0.00 |
| 225224_at    | <b>C20orf112</b> | 140688 chromosome 20 open reading frame 112            | -5.20  | 0.51 |
| 233571_x_at  | <b>C20orf149</b> | 79144 chromosome 20 open reading frame 149             | 3.46   | 0.16 |
| 225313_at    | <b>C20orf177</b> | 63939 chromosome 20 open reading frame 177             | -4.86  | 0.25 |
| 1567035_at   | <b>C20orf181</b> | 140843 chromosome 20 open reading frame 181            | 2.50   | 0.02 |
| 218586_at    | <b>C20orf20</b>  | 55257 chromosome 20 open reading frame 20              | 2.03   | 0.34 |
| 206656_s_at  | <b>C20orf3</b>   | 57136 chromosome 20 open reading frame 3               | -3.49  | 0.00 |
| 224584_at    | <b>C20orf30</b>  | 29058 chromosome 20 open reading frame 30              | 2.11   | 0.51 |
| 220888_s_at  | <b>C20orf32</b>  | 57091 chromosome 20 open reading frame 32              | -7.20  | 0.25 |
| 202217_at    | <b>C21orf33</b>  | 8209 chromosome 21 open reading frame 33               | 2.78   | 0.51 |
| 223360_at    | <b>C21orf56</b>  | 84221 chromosome 21 open reading frame 56              | -2.67  | 0.03 |
| 225794_s_at  | <b>C22orf32</b>  | 91689 chromosome 22 open reading frame 32              | 4.35   | 0.25 |
| 209906_at    | <b>C3AR1</b>     | 719 complement component 3a receptor 1                 | 7.98   | 0.00 |
| 1554147_s_at | <b>C3orf15</b>   | 89876 chromosome 3 open reading frame 15               | 6.51   | 0.02 |

|              |                 |                                                                     |        |      |
|--------------|-----------------|---------------------------------------------------------------------|--------|------|
| 225281_at    | <b>C3orf17</b>  | 25871 chromosome 3 open reading frame 17                            | 3.22   | 0.34 |
| 1554176_a_at | <b>C3orf33</b>  | 285315 chromosome 3 open reading frame 33                           | 3.77   | 0.00 |
| 1553158_at   | <b>C3orf34</b>  | 84984 chromosome 3 open reading frame 34                            | -7.95  | 0.00 |
| 226524_at    | <b>C3orf38</b>  | 285237 chromosome 3 open reading frame 38                           | 4.38   | 0.08 |
| 227599_at    | <b>C3orf59</b>  | 151963 chromosome 3 open reading frame 59                           | 5.26   | 0.00 |
| 241817_at    | <b>C3orf62</b>  | 375341 chromosome 3 open reading frame 62                           | -2.06  | 0.51 |
| 219023_at    | <b>C4orf16</b>  | 55435 chromosome 4 open reading frame 16                            | 15.19  | 0.00 |
| 218449_at    | <b>C4orf20</b>  | 55325 chromosome 4 open reading frame 20                            | 2.34   | 0.51 |
| 227856_at    | <b>C4orf32</b>  | 132720 chromosome 4 open reading frame 32                           | 6.33   | 0.06 |
| 220088_at    | <b>C5AR1</b>    | 728 complement component 5a receptor 1                              | -2.36  | 0.00 |
| 203024_s_at  | <b>C5orf15</b>  | 56951 chromosome 5 open reading frame 15                            | 3.63   | 0.00 |
| 226306_at    | <b>C6orf1</b>   | 221491 chromosome 6 open reading frame 1                            | 2.31   | 0.06 |
| 217924_at    | <b>C6orf106</b> | 64771 chromosome 6 open reading frame 106                           | 7.64   | 0.00 |
| 39817_s_at   | <b>C6orf108</b> | 10591 chromosome 6 open reading frame 108                           | 3.07   | 0.16 |
| 223361_at    | <b>C6orf115</b> | 58527 chromosome 6 open reading frame 115                           | 2.85   | 0.02 |
| 242557_at    | <b>C6orf12</b>  | 80862 Chromosome 6 open reading frame 12                            | 4.90   | 0.34 |
| 225723_at    | <b>C6orf129</b> | 154467 chromosome 6 open reading frame 129                          | 5.65   | 0.06 |
| 212923_s_at  | <b>C6orf145</b> | 221749 chromosome 6 open reading frame 145                          | 13.29  | 0.06 |
| 1559051_s_at | <b>C6orf150</b> | 115004 chromosome 6 open reading frame 150                          | 7.34   | 0.13 |
| 236178_at    | <b>C6orf162</b> | 57150 chromosome 6 open reading frame 162                           | -5.83  | 0.34 |
| 1564002_a_at | <b>C6orf199</b> | 221264 chromosome 6 open reading frame 199                          | 2.49   | 0.34 |
| 218195_at    | <b>C6orf211</b> | 79624 chromosome 6 open reading frame 211                           | 2.08   | 0.00 |
| 209829_at    | <b>C6orf32</b>  | 9750 chromosome 6 open reading frame 32                             | -2.17  | 0.00 |
| 218233_s_at  | <b>C6orf49</b>  | 29964 chromosome 6 open reading frame 49                            | 5.07   | 0.00 |
| 219006_at    | <b>C6orf66</b>  | 29078 chromosome 6 open reading frame 66                            | 4.68   | 0.34 |
| 225576_at    | <b>C6orf72</b>  | 116254 chromosome 6 open reading frame 72                           | -2.93  | 0.34 |
| 224987_at    | <b>C6orf89</b>  | 221477 chromosome 6 open reading frame 89                           | 2.32   | 0.16 |
| 215380_s_at  | <b>C7orf24</b>  | 79017 chromosome 7 open reading frame 24                            | 8.87   | 0.02 |
| 221573_at    | <b>C7orf25</b>  | 79020 chromosome 7 open reading frame 25                            | -2.69  | 0.79 |
| 231435_at    | <b>C7orf34</b>  | 135927 chromosome 7 open reading frame 34                           | -3.25  | 0.34 |
| 229762_at    | <b>C7orf38</b>  | 221786 Chromosome 7 open reading frame 38                           | 2.36   | 0.34 |
| 225699_at    | <b>C7orf40</b>  | 285958 chromosome 7 open reading frame 40                           | 3.08   | 0.51 |
| 226018_at    | <b>C7orf41</b>  | 222166 chromosome 7 open reading frame 41                           | -7.69  | 0.07 |
| 220659_s_at  | <b>C7orf43</b>  | 55262 chromosome 7 open reading frame 43                            | -2.41  | 0.00 |
| 206497_at    | <b>C7orf44</b>  | 55744 chromosome 7 open reading frame 44                            | -3.80  | 0.08 |
| 225534_at    | <b>C8orf40</b>  | 114926 chromosome 8 open reading frame 40                           | 5.00   | 0.51 |
| 226165_at    | <b>C8orf59</b>  | 401466 chromosome 8 open reading frame 59                           | 2.92   | 0.00 |
| 225702_at    | <b>C8orf76</b>  | 84933 chromosome 8 open reading frame 76                            | 2.48   | 0.34 |
| 1557866_at   | <b>C9orf117</b> | 286207 chromosome 9 open reading frame 117                          | 2.48   | 0.00 |
| 232270_at    | <b>C9orf3</b>   | 84909 Chromosome 9 open reading frame 3                             | 2.05   | 0.16 |
| 223368_s_at  | <b>C9orf32</b>  | 28989 chromosome 9 open reading frame 32                            | 3.81   | 0.08 |
| 1553809_a_at | <b>C9orf71</b>  | 169693 chromosome 9 open reading frame 71                           | -25.13 | 0.51 |
| 219276_x_at  | <b>C9orf82</b>  | 79886 chromosome 9 open reading frame 82                            | 2.59   | 0.16 |
| 223398_at    | <b>C9orf89</b>  | 84270 chromosome 9 open reading frame 89                            | 2.04   | 0.51 |
| 221865_at    | <b>C9orf91</b>  | 203197 chromosome 9 open reading frame 91                           | 9.88   | 0.06 |
| 209301_at    | <b>CA2</b>      | 760 carbonic anhydrase II                                           | 3.91   | 0.02 |
| 206209_s_at  | <b>CA4</b>      | 762 carbonic anhydrase IV                                           | -10.62 | 0.79 |
| 218168_s_at  | <b>CABC1</b>    | 56997 (S. pombe)<br>chaperone, ABC1 activity of bc1 complex homolog | -13.62 | 0.00 |
| 37652_at     | <b>CABIN1</b>   | 23523 calcineurin binding protein 1                                 | -4.36  | 0.16 |
| 201381_x_at  | <b>CACYBP</b>   | 27101 calcyclin binding protein                                     | 2.34   | 0.25 |
| 209031_at    | <b>CADM1</b>    | 23705 cell adhesion molecule 1                                      | 2.25   | 0.06 |
| 235076_at    | <b>CALCOCO2</b> | 10241 calcium binding and coiled-coil domain 2                      | 2.37   | 0.08 |
| 212953_x_at  | <b>CALR</b>     | 811 calreticulin                                                    | 4.75   | 0.00 |
| 214845_s_at  | <b>CALU</b>     | 813 calumenin                                                       | 7.60   | 0.00 |

|              |                   |        |                                                                                                   |        |      |
|--------------|-------------------|--------|---------------------------------------------------------------------------------------------------|--------|------|
| 220246_at    | <b>CAMK1D</b>     | 57118  | calcium/calmodulin-dependent protein kinase ID                                                    | -4.19  | 0.00 |
|              | <b>CAMK1D</b> /// | 283070 | /// calcium/calmodulin-dependent protein kinase ID                                                |        |      |
| 226382_at    | <b>LOC283070</b>  | 57118  | /// hypothetical protein LOC283070                                                                | -4.92  | 0.51 |
| 215161_at    | <b>CAMK1G</b>     | 57172  | calcium/calmodulin-dependent protein kinase IG<br>Calcium/calmodulin-dependent protein kinase     | 10.83  | 0.51 |
| 34846_at     | <b>CAMK2B</b>     | 816    | (CaM kinase) II beta<br>Calcium/calmodulin-dependent protein kinase                               | -3.10  | 0.00 |
| 231042_s_at  | <b>CAMK2D</b>     | 817    | (CaM kinase) II delta<br>calcium/calmodulin-dependent protein kinase                              | 6.47   | 0.34 |
| 212757_s_at  | <b>CAMK2G</b>     | 818    | (CaM kinase) II gamma                                                                             | -6.93  | 0.00 |
| 210244_at    | <b>CAMP</b>       | 820    | cathelicidin antimicrobial peptide                                                                | -31.91 | 0.07 |
| 46323_at     | <b>CANT1</b>      | 124583 | calcium activated nucleotidase 1                                                                  | -2.18  | 0.00 |
| 208852_s_at  | <b>CANX</b>       | 821    | calnexin                                                                                          | 4.60   | 0.00 |
| 201850_at    | <b>CAPG</b>       | 822    | capping protein (actin filament), gelsolin-like                                                   | 4.18   | 0.02 |
| 200723_s_at  | <b>CAPRIN1</b>    | 4076   | cell cycle associated protein 1<br>cysteinyl-tRNA synthetase 2, mitochondrial                     | 2.42   | 0.25 |
| 218153_at    | <b>CARS2</b>      | 79587  | (putative)                                                                                        | -2.49  | 0.00 |
| 224619_at    | <b>CASC4</b>      | 113201 | cancer susceptibility candidate 4                                                                 | -3.86  | 0.00 |
| 207181_s_at  | <b>CASP7</b>      | 840    | caspase 7, apoptosis-related cysteine peptidase                                                   | 5.87   | 0.06 |
| 207686_s_at  | <b>CASP8</b>      | 841    | caspase 8, apoptosis-related cysteine peptidase                                                   | -4.99  | 0.00 |
| 207317_s_at  | <b>CASQ2</b>      | 845    | calsequestrin 2 (cardiac muscle)                                                                  | 3.26   | 0.08 |
| 211922_s_at  | <b>CAT</b>        | 847    | catalase                                                                                          | -12.24 | 0.00 |
| 216903_s_at  | <b>CBARA1</b>     | 10367  | calcium binding atopy-related autoantigen 1<br>core-binding factor, runt domain, alpha subunit 2; | 3.00   | 0.00 |
| 208056_s_at  | <b>CBFA2T3</b>    | 863    | translocated to, 3                                                                                | -36.10 | 0.00 |
| 202370_s_at  | <b>CBFB</b>       | 865    | core-binding factor, beta subunit                                                                 | 2.40   | 0.06 |
| 212816_s_at  | <b>CBS</b>        | 875    | cystathionine-beta-synthase<br>chromobox homolog 1 (HP1 beta homolog                              | -3.34  | 0.03 |
| 201518_at    | <b>CBX1</b>       | 10951  | Drosophila )<br>chromobox homolog 5 (HP1 alpha homolog,                                           | -3.12  | 0.00 |
| 209715_at    | <b>CBX5</b>       | 23468  | Drosophila)                                                                                       | 17.63  | 0.16 |
| 212914_at    | <b>CBX7</b>       | 23492  | chromobox homolog 7                                                                               | -9.98  | 0.03 |
| 224737_x_at  | <b>CCAR1</b>      | 55749  | cell division cycle and apoptosis regulator 1                                                     | 2.58   | 0.34 |
| 48117_at     | <b>CCDC101</b>    | 112869 | coiled-coil domain containing 101                                                                 | 2.77   | 0.34 |
| 229063_s_at  | <b>CCDC107</b>    | 203260 | coiled-coil domain containing 107                                                                 | 3.68   | 0.25 |
| 229082_at    | <b>CCDC125</b>    | 202243 | coiled-coil domain containing 125                                                                 | -4.49  | 0.08 |
| 1554023_s_at | <b>CCDC13</b>     | 152206 | coiled-coil domain containing 13                                                                  | -7.29  | 0.00 |
| 232989_s_at  | <b>CCDC136</b>    | 64753  | coiled-coil domain containing 136                                                                 | -2.55  | 0.79 |
| 1557366_at   | <b>CCDC144B</b>   | 284047 | coiled-coil domain containing 144B                                                                | -2.79  | 0.03 |
| 220308_at    | <b>CCDC19</b>     | 25790  | coiled-coil domain containing 19                                                                  | -2.65  | 0.16 |
| 209479_at    | <b>CCDC28A</b>    | 25901  | coiled-coil domain containing 28A                                                                 | -7.29  | 0.00 |
| 225331_at    | <b>CCDC50</b>     | 152137 | coiled-coil domain containing 50                                                                  | 4.52   | 0.34 |
| 222792_s_at  | <b>CCDC59</b>     | 29080  | coiled-coil domain containing 59                                                                  | 2.15   | 0.08 |
| 220094_s_at  | <b>CCDC90A</b>    | 63933  | coiled-coil domain containing 90A                                                                 | 3.52   | 0.79 |
| 218288_s_at  | <b>CCDC90B</b>    | 60492  | coiled-coil domain containing 90B                                                                 | 3.00   | 0.51 |
| 209688_s_at  | <b>CCDC93</b>     | 54520  | coiled-coil domain containing 93                                                                  | 3.77   | 0.00 |
| 226521_s_at  | <b>CCDC98</b>     | 84142  | coiled-coil domain containing 98                                                                  | 2.73   | 0.34 |
| 210133_at    | <b>CCL11</b>      | 6356   | chemokine (C-C motif) ligand 11                                                                   | 3.67   | 0.06 |
| 216714_at    | <b>CCL13</b>      | 6357   | chemokine (C-C motif) ligand 13                                                                   | 93.01  | 0.00 |
| 207900_at    | <b>CCL17</b>      | 6361   | chemokine (C-C motif) ligand 17<br>chemokine (C-C motif) ligand 18 (pulmonary and                 | 7.35   | 0.16 |
| 32128_at     | <b>CCL18</b>      | 6362   | activation-regulated)                                                                             | 3.10   | 0.25 |
| 216598_s_at  | <b>CCL2</b>       | 6347   | chemokine (C-C motif) ligand 2                                                                    | 120.52 | 0.00 |
| 205476_at    | <b>CCL20</b>      | 6364   | chemokine (C-C motif) ligand 20                                                                   | 169.03 | 0.00 |

|              |                   |                                                                                                                                                   |        |      |
|--------------|-------------------|---------------------------------------------------------------------------------------------------------------------------------------------------|--------|------|
|              |                   | chemokine (C-C motif) ligand 3 /// chemokine (C-C motif) ligand 3-like 1 /// chemokine (C-C motif) ligand 3-like 3 /// similar to Small inducible |        |      |
|              | <b>CCL3</b> ///   |                                                                                                                                                   |        |      |
|              | <b>CCL3L1</b> /// | 414062 /// cytokine A3-like 1 precursor (Tonsillar lymphocyte                                                                                     |        |      |
|              | <b>CCL3L3</b> /// | 6348 /// LD78 beta protein) (LD78-beta(1-70)) (G0/G1                                                                                              |        |      |
|              | <b>LOC728830</b>  | 6349 /// switch regulatory protein 19-2) (GOS19-2 protein)                                                                                        |        |      |
|              | ///               | 728830 /// (PAT 464.2) /// similar to chemokine (C-C motif)                                                                                       |        |      |
| 205114_s_at  | <b>LOC730422</b>  | 730422 ligand 3-like 3                                                                                                                            | 7.89   | 0.00 |
| 204103_at    | <b>CCL4</b>       | 6351 chemokine (C-C motif) ligand 4                                                                                                               | 27.47  | 0.00 |
| 1555759_a_at | <b>CCL5</b>       | 6352 chemokine (C-C motif) ligand 5                                                                                                               | 2.97   | 0.25 |
| 208075_s_at  | <b>CCL7</b>       | 6354 chemokine (C-C motif) ligand 7                                                                                                               | 50.18  | 0.00 |
| 214038_at    | <b>CCL8</b>       | 6355 chemokine (C-C motif) ligand 8                                                                                                               | 91.74  | 0.00 |
| 223164_at    | <b>CCM2</b>       | 83605 cerebral cavernous malformation 2                                                                                                           | -6.65  | 0.07 |
| 201955_at    | <b>CCNC</b>       | 892 cyclin C                                                                                                                                      | 2.46   | 0.51 |
| 200953_s_at  | <b>CCND2</b>      | 894 cyclin D2                                                                                                                                     | 4.47   | 0.00 |
| 201700_at    | <b>CCND3</b>      | 896 cyclin D3                                                                                                                                     | -2.14  | 0.00 |
| 223084_s_at  | <b>CCNDBP1</b>    | 23582 cyclin D-type binding-protein 1                                                                                                             | -3.65  | 0.00 |
| 202769_at    | <b>CCNG2</b>      | 901 cyclin G2                                                                                                                                     | -4.38  | 0.00 |
| 204093_at    | <b>CCNH</b>       | 902 cyclin H                                                                                                                                      | 2.97   | 0.02 |
| 219470_x_at  | <b>CCNJ</b>       | 54619 cyclin J                                                                                                                                    | 3.94   | 0.51 |
| 219227_at    | <b>CCNJL</b>      | 79616 cyclin J-like                                                                                                                               | -42.14 | 0.00 |
| 206967_at    | <b>CCNT1</b>      | 904 cyclin T1                                                                                                                                     | 2.53   | 0.79 |
| 224652_at    | <b>CCNY</b>       | 219771 cyclin Y                                                                                                                                   | -4.15  | 0.00 |
| 221156_x_at  | <b>CCPG1</b>      | 9236 cell cycle progression 1                                                                                                                     | -9.97  | 0.00 |
| 206991_s_at  | <b>CCR5</b>       | 1234 chemokine (C-C motif) receptor 5                                                                                                             | 29.95  | 0.00 |
| 205271_s_at  | <b>CCRK</b>       | 23552 cell cycle related kinase                                                                                                                   | 2.14   | 0.25 |
|              | <b>CCRL2</b> ///  | 727811 /// chemokine (C-C motif) receptor-like 2 /// similar to                                                                                   |        |      |
| 211434_s_at  | <b>LOC727811</b>  | 9034 chemokine (C-C motif) receptor-like 2                                                                                                        | 118.80 | 0.00 |
|              |                   | CCR4 carbon catabolite repression 4-like (S.                                                                                                      |        |      |
| 1554283_at   | <b>CCRN4L</b>     | 25819 cerevisiae)                                                                                                                                 | 12.28  | 0.02 |
| 201947_s_at  | <b>CCT2</b>       | 10576 chaperonin containing TCP1, subunit 2 (beta)                                                                                                | 5.72   | 0.00 |
| 200910_at    | <b>CCT3</b>       | 7203 chaperonin containing TCP1, subunit 3 (gamma)                                                                                                | 5.00   | 0.34 |
| 200877_at    | <b>CCT4</b>       | 10575 chaperonin containing TCP1, subunit 4 (delta)                                                                                               | 4.67   | 0.06 |
| 201327_s_at  | <b>CCT6A</b>      | 908 chaperonin containing TCP1, subunit 6A (zeta 1)                                                                                               | 3.22   | 0.06 |
|              |                   | chaperonin containing TCP1, subunit 6A (zeta 1)                                                                                                   |        |      |
| 227301_at    | <b>CCT6AP1</b>    | 643253 pseudogene 1                                                                                                                               | -2.63  | 0.34 |
| 200873_s_at  | <b>CCT8</b>       | 10694 chaperonin containing TCP1, subunit 8 (theta)                                                                                               | 5.17   | 0.02 |
| 215049_x_at  | <b>CD163</b>      | 9332 CD163 molecule                                                                                                                               | 5.34   | 0.00 |
| 206749_at    | <b>CD1B</b>       | 910 CD1b molecule                                                                                                                                 | 41.45  | 0.79 |
| 215784_at    | <b>CD1E</b>       | 913 CD1e molecule                                                                                                                                 | 15.48  | 0.08 |
| 207277_at    | <b>CD209</b>      | 30835 CD209 molecule                                                                                                                              | 63.12  | 0.02 |
|              | <b>CD22</b> ///   | 4099 ///                                                                                                                                          |        |      |
| 38521_at     | <b>MAG</b>        | 933 CD22 molecule /// myelin associated glycoprotein                                                                                              | 10.82  | 0.00 |
| 207315_at    | <b>CD226</b>      | 10666 CD226 molecule                                                                                                                              | 3.16   | 0.08 |
| 223834_at    | <b>CD274</b>      | 29126 CD274 molecule                                                                                                                              | 7.57   | 0.00 |
| 203799_at    | <b>CD302</b>      | 9936 CD302 molecule                                                                                                                               | -31.97 | 0.00 |
| 206488_s_at  | <b>CD36</b>       | 948 CD36 molecule (thrombospondin receptor)                                                                                                       | 3.22   | 0.51 |
| 205692_s_at  | <b>CD38</b>       | 952 CD38 molecule                                                                                                                                 | 2.43   | 0.51 |
|              |                   | CD40 molecule, TNF receptor superfamily                                                                                                           |        |      |
| 215346_at    | <b>CD40</b>       | 958 member 5                                                                                                                                      | 37.80  | 0.00 |
| 210916_s_at  | <b>CD44</b>       | 960 CD44 molecule (Indian blood group)                                                                                                            | 4.02   | 0.00 |
| 204118_at    | <b>CD48</b>       | 962 CD48 molecule                                                                                                                                 | 3.21   | 0.00 |
| 203507_at    | <b>CD68</b>       | 968 CD68 molecule                                                                                                                                 | 4.92   | 0.06 |
| 209795_at    | <b>CD69</b>       | 969 CD69 molecule                                                                                                                                 | 43.13  | 0.00 |

|              |                   |                                                                                                    |        |      |
|--------------|-------------------|----------------------------------------------------------------------------------------------------|--------|------|
|              |                   | CD74 molecule, major histocompatibility complex,                                                   |        |      |
| 1567627_at   | <b>CD74</b>       | 972 class II invariant chain                                                                       | 18.11  | 0.00 |
| 207176_s_at  | <b>CD80</b>       | 941 CD80 molecule                                                                                  | 3.23   | 0.16 |
| 200675_at    | <b>CD81</b>       | 975 CD81 molecule                                                                                  | 4.82   | 0.02 |
| 204440_at    | <b>CD83</b>       | 9308 CD83 molecule                                                                                 | 64.43  | 0.00 |
| 211190_x_at  | <b>CD84</b>       | 8832 CD84 molecule                                                                                 | 2.60   | 0.51 |
| 210895_s_at  | <b>CD86</b>       | 942 CD86 molecule                                                                                  | 5.24   | 0.08 |
| 202878_s_at  | <b>CD93</b>       | 22918 CD93 molecule                                                                                | -2.63  | 0.00 |
| 202910_s_at  | <b>CD97</b>       | 976 CD97 molecule                                                                                  | -2.14  | 0.25 |
| 205627_at    | <b>CDA</b>        | 978 cytidine deaminase<br>cytidine and dCMP deaminase domain containing                            | -14.94 | 0.16 |
| 233564_s_at  | <b>CDADC1</b>     | 81602 1                                                                                            | 2.44   | 0.51 |
| 201725_at    | <b>CDC123</b>     | 8872 cell division cycle 123 homolog (S. cerevisiae)<br>CDC14 cell division cycle 14 homolog B (S. | -2.08  | 0.03 |
| 211348_s_at  | <b>CDC14B</b>     | 8555 cerevisiae)                                                                                   | 2.34   | 0.25 |
| 212897_at    | <b>CDC2L6</b>     | 23097 cell division cycle 2-like 6 (CDK8-like)                                                     | -7.91  | 0.00 |
| 203968_s_at  | <b>CDC6</b>       | 990 cell division cycle 6 homolog (S. cerevisiae)                                                  | 2.34   | 0.00 |
| 226056_at    | <b>CDGAP</b>      | 57514 Cdc42 GTPase-activating protein                                                              | 24.44  | 0.06 |
| 203440_at    | <b>CDH2</b>       | 1000 cadherin 2, type 1, N-cadherin (neuronal)                                                     | -7.11  | 0.00 |
| 233391_at    | <b>CDH26</b>      | 60437 cadherin-like 26                                                                             | 2.60   | 0.00 |
| 201938_at    | <b>CDK2AP1</b>    | 8099 CDK2-associated protein 1                                                                     | -4.98  | 0.00 |
| 202246_s_at  | <b>CDK4</b>       | 1019 cyclin-dependent kinase 4<br>cyclin-dependent kinase 5, regulatory subunit 1                  | 8.84   | 0.08 |
| 204995_at    | <b>CDK5R1</b>     | 8851 (p35)                                                                                         | -4.60  | 0.79 |
| 202284_s_at  | <b>CDKN1A</b>     | 1026 cyclin-dependent kinase inhibitor 1A (p21, Cip1)                                              | 56.76  | 0.00 |
| 209112_at    | <b>CDKN1B</b>     | 1027 cyclin-dependent kinase inhibitor 1B (p27, Kip1)                                              | -7.98  | 0.00 |
| 238412_at    | <b>CDR2</b>       | 1039 Cerebellar degeneration-related protein 2, 62kDa                                              | 7.71   | 0.16 |
| 206387_at    | <b>CDX2</b>       | 1045 caudal type homeobox 2<br>carcinoembryonic antigen-related cell adhesion                      | 2.49   | 0.51 |
| 209498_at    | <b>CEACAM1</b>    | 634 molecule 1 (biliary glycoprotein)<br>carcinoembryonic antigen-related cell adhesion            | 3.15   | 0.02 |
| 207205_at    | <b>CEACAM4</b>    | 1089 molecule 4<br>carcinoembryonic antigen-related cell adhesion                                  | -10.36 | 0.79 |
| 206676_at    | <b>CEACAM8</b>    | 1088 molecule 8                                                                                    | -3.03  | 0.16 |
| 203973_s_at  | <b>CEBPD</b>      | 1052 CCAAT/enhancer binding protein (C/EBP), delta                                                 | -7.11  | 0.00 |
| 203341_at    | <b>CEBPZ</b>      | 10153 CCAAT/enhancer binding protein zeta<br>cat eye syndrome chromosome region, candidate         | 4.32   | 0.02 |
| 218592_s_at  | <b>CECR5</b>      | 27440 5                                                                                            | 6.30   | 0.25 |
| 228559_at    | <b>CENPN</b>      | 55839 centromere protein N                                                                         | 2.22   | 0.79 |
| 205212_s_at  | <b>CENTB1</b>     | 9744 centaurin, beta 1                                                                             | -2.39  | 0.34 |
| 213618_at    | <b>CENTD1</b>     | 116984 centaurin, delta 1                                                                          | 11.84  | 0.00 |
| 218950_at    | <b>CENTD3</b>     | 64411 centaurin, delta 3                                                                           | -3.43  | 0.00 |
| 225789_at    | <b>CENTG3</b>     | 116988 centaurin, gamma 3                                                                          | 6.23   | 0.00 |
| 212746_s_at  | <b>CEP170</b>     | 9859 centrosomal protein 170kDa                                                                    | 2.31   | 0.08 |
|              | <b>CEP170 ///</b> | 645455 ///<br>centrosomal protein 170kDa ///<br>centrosomal                                        |        |      |
| 1552717_s_at | <b>CEP170L</b>    | 9859 protein 170kDa-like                                                                           | 3.16   | 0.06 |
| 229181_s_at  | <b>CEP27</b>      | 55142 centrosomal protein 27kDa                                                                    | 2.58   | 0.08 |
| 233650_at    | <b>CEP63</b>      | 80254 centrosomal protein 63kDa                                                                    | -5.07  | 0.00 |
| 1561884_at   | <b>CEPT1</b>      | 10390 choline/ethanolamine phosphotransferase 1                                                    | 2.06   | 0.34 |
| 218421_at    | <b>CERK</b>       | 64781 ceramide kinase                                                                              | -2.24  | 0.51 |
| 202357_s_at  | <b>CFB</b>        | 629 complement factor B                                                                            | 14.22  | 0.00 |
| 203166_at    | <b>CFDP1</b>      | 10428 craniofacial development protein 1                                                           | 3.83   | 0.00 |
| 224663_s_at  | <b>CFL2</b>       | 1073 cofilin 2 (muscle)                                                                            | 6.54   | 0.34 |
| 206380_s_at  | <b>CFP</b>        | 5199 complement factor properdin                                                                   | -3.21  | 0.00 |



|              |                  |                                                                                     |        |      |
|--------------|------------------|-------------------------------------------------------------------------------------|--------|------|
| 213375_s_at  | <b>CG018</b>     | 90634 hypothetical gene CG018                                                       | 10.21  | 0.00 |
| 206932_at    | <b>CH25H</b>     | 9023 cholesterol 25-hydroxylase<br>coiled-coil-helix-coiled-coil-helix domain       | 11.05  | 0.02 |
| 217720_at    | <b>CHCHD2</b>    | 51142 containing 2<br>chromodomain helicase DNA binding protein 1-                  | 3.01   | 0.00 |
| 1556988_s_at | <b>CHD1L</b>     | 9557 like                                                                           | 2.45   | 0.34 |
| 218829_s_at  | <b>CHD7</b>      | 55636 chromodomain helicase DNA binding protein 7<br>chondroitin beta1,4 N-         | -3.69  | 0.07 |
| 219049_at    | <b>ChGn</b>      | 55790 acetylgalactosaminyltransferase                                               | -11.86 | 0.00 |
| 213060_s_at  | <b>CHI3L2</b>    | 1117 chitinase 3-like 2                                                             | 17.85  | 0.00 |
| 207099_s_at  | <b>CHM</b>       | 1121 choroideremia (Rab escort protein 1)                                           | 2.86   | 0.51 |
| 218178_s_at  | <b>CHMP1B</b>    | 57132 chromatin modifying protein 1B                                                | -7.07  | 0.00 |
| 202537_s_at  | <b>CHMP2B</b>    | 25978 chromatin modifying protein 2B                                                | 2.82   | 0.00 |
| 218571_s_at  | <b>CHMP4A</b>    | 29082 chromatin modifying protein 4A<br>Cysteine and histidine-rich domain (CHORD)- | 2.49   | 0.13 |
| 239436_at    | <b>CHORDC1</b>   | 26973 containing 1                                                                  | -2.76  | 0.03 |
| 207993_s_at  | <b>CHP</b>       | 11261 calcium binding protein P22                                                   | -2.08  | 0.16 |
| 221675_s_at  | <b>CHPT1</b>     | 56994 choline phosphotransferase 1                                                  | -4.46  | 0.00 |
| 218927_s_at  | <b>CHST12</b>    | 55501 carbohydrate (chondroitin 4) sulfotransferase 12                              | 2.11   | 0.06 |
| 203044_at    | <b>CHSY1</b>     | 22856 carbohydrate (chondroitin) synthase 1                                         | -2.20  | 0.00 |
| 212784_at    | <b>CIC</b>       | 23152 capicua homolog (Drosophila)<br>class II, major histocompatibility complex,   | -3.21  | 0.00 |
| 210925_at    | <b>CIITA</b>     | 4261 transactivator                                                                 | 39.28  | 0.16 |
| 1554451_s_at | <b>CIP29 ///</b> | 84324 /// cytokine induced protein 29 kDa /// DnaJ (Hsp40)                          |        |      |
| 230142_s_at  | <b>DNAJC14</b>   | 85406 homolog, subfamily C, member 14                                               | 2.09   | 0.25 |
| 223377_x_at  | <b>CIRBP</b>     | 1153 cold inducible RNA binding protein                                             | -3.44  | 0.00 |
| 240757_at    | <b>CISH</b>      | 1154 cytokine inducible SH2-containing protein                                      | 6.49   | 0.00 |
| 212306_at    | <b>CLASP1</b>    | 23332 Cytoplasmic linker associated protein 1                                       | -2.05  | 0.08 |
| 206207_at    | <b>CLASP2</b>    | 23122 cytoplasmic linker associated protein 2                                       | 2.30   | 0.25 |
| 213628_at    | <b>CLC</b>       | 1178 Charcot-Leyden crystal protein                                                 | -2.77  | 0.03 |
| 203950_s_at  | <b>CLCC1</b>     | 23155 chloride channel CLIC-like 1                                                  | -13.20 | 0.51 |
| 209235_at    | <b>CLCN6</b>     | 1185 chloride channel 6                                                             | 3.70   | 0.51 |
| 228707_at    | <b>CLCN7</b>     | 1186 chloride channel 7                                                             | 7.84   | 0.08 |
| 206682_at    | <b>CLDN23</b>    | 137075 claudin 23                                                                   | 2.60   | 0.16 |
| 219859_at    | <b>CLEC10A</b>   | 10462 C-type lectin domain family 10, member A                                      | 7.50   | 0.34 |
| 219890_at    | <b>CLEC4E</b>    | 26253 C-type lectin domain family 4, member E                                       | 3.27   | 0.00 |
| 221881_s_at  | <b>CLEC5A</b>    | 23601 C-type lectin domain family 5, member A                                       | 25.76  | 0.00 |
| 1558924_s_at | <b>CLIC4</b>     | 25932 chloride intracellular channel 4                                              | 14.67  | 0.00 |
| 214683_s_at  | <b>CLIP1</b>     | 6249 CAP-GLY domain containing linker protein 1                                     | -2.99  | 0.16 |
| 241403_at    | <b>CLK1</b>      | 1195 CDC-like kinase 1                                                              | -2.39  | 0.16 |
|              | <b>CLK4</b>      | 57396 CDC-like kinase 4                                                             | -2.15  | 0.25 |
| 221845_s_at  | <b>CLPB</b>      | 81570 ClpB caseinolytic peptidase B homolog (E. coli)                               | 2.88   | 0.25 |
| 226935_s_at  | <b>CLPTM1L</b>   | 81037 CLPTM1-like                                                                   | 2.32   | 0.79 |
| 204809_at    | <b>CLPX</b>      | 10845 ClpX caseinolytic peptidase X homolog (E. coli)                               | -3.07  | 0.25 |
| 200960_x_at  | <b>CLTA</b>      | 1211 clathrin, light chain (Lca)<br>CKLF-like MARVEL transmembrane domain           | 3.09   | 0.02 |
| 1555738_at   | <b>CMTM1</b>     | 113540 containing 1<br>CKLF-like MARVEL transmembrane domain                        | -9.86  | 0.03 |
| 229967_at    | <b>CMTM2</b>     | 146225 containing 2<br>CNDP dipeptidase 2 (metallopeptidase M20)                    | -18.90 | 0.00 |
| 217752_s_at  | <b>CNDP2</b>     | 55748 family)                                                                       | 7.45   | 0.00 |
| 201605_x_at  | <b>CNN2</b>      | 1265 calponin 2                                                                     | -2.54  | 0.00 |
| 220739_s_at  | <b>CNNM3</b>     | 26505 cyclin M3                                                                     | -2.56  | 0.79 |
| 226153_s_at  | <b>CNOT6L</b>    | 246175 CCR4-NOT transcription complex, subunit 6-like                               | -2.62  | 0.79 |

|              |                            |                                                                                               |                                           |      |
|--------------|----------------------------|-----------------------------------------------------------------------------------------------|-------------------------------------------|------|
|              | <b>CNTNAP3</b> ///         | contactin associated protein-like 3 ///                                                       |                                           |      |
|              | <b>CNTNAP3B</b> 389734 /// | associated protein-like 3B ///                                                                |                                           |      |
|              | ///                        | 728577 ///                                                                                    | associated protein-like 3 precursor (Cell |      |
| 223796_at    | <b>LOC728577</b> 79937     | recognition molecule Caspr3)                                                                  | -44.42                                    | 0.08 |
| 211343_s_at  | <b>COL13A1</b>             | 1305 collagen, type XIII, alpha 1                                                             | 10.58                                     | 0.00 |
| 1555953_at   | <b>COL18A1</b>             | 80781 collagen, type XVIII, alpha 1                                                           | -3.67                                     | 0.08 |
| 216898_s_at  | <b>COL4A3</b>              | 1285 collagen, type IV, alpha 3 (Goodpasture antigen)                                         | 2.39                                      | 0.51 |
| 204724_s_at  | <b>COL9A3</b>              | 1299 collagen, type IX, alpha 3                                                               | -12.89                                    | 0.08 |
| 222637_at    | <b>COMMD10</b>             | 51397 COMM domain containing 10                                                               | 4.81                                      | 0.13 |
| 206441_s_at  | <b>COMMD4</b>              | 54939 COMM domain containing 4                                                                | 4.50                                      | 0.00 |
| 224387_at    | <b>COMMD5</b>              | 28991 COMM domain containing 5                                                                | 3.03                                      | 0.00 |
| 208818_s_at  | <b>COMT</b>                | 1312 catechol-O-methyltransferase                                                             | 2.97                                      | 0.34 |
| 222386_s_at  | <b>COPZ1</b>               | 22818 coatomer protein complex, subunit zeta 1                                                | 5.62                                      | 0.06 |
| 209083_at    | <b>CORO1A</b>              | 11151 coronin, actin binding protein, 1A                                                      | -3.86                                     | 0.00 |
| 203880_at    | <b>COX17</b>               | 10063 COX17 cytochrome c oxidase assembly homolog (S. cerevisiae)                             | 3.63                                      | 0.00 |
| 231831_at    | <b>COX19</b>               | 90639 COX19 cytochrome c oxidase assembly homolog (S. cerevisiae)                             | -3.87                                     | 0.51 |
| 201597_at    | <b>COX7A2</b>              | 1347 cytochrome c oxidase subunit VIIa polypeptide 2 (liver)                                  | 2.10                                      | 0.00 |
| 201119_s_at  | <b>COX8A</b>               | 1351 cytochrome c oxidase subunit 8A (ubiquitous) cytoplasmic polyadenylation element binding | 2.02                                      | 0.06 |
| 235479_at    | <b>CPEB2</b>               | 132864 protein 2                                                                              | -5.13                                     | 0.03 |
| 235706_at    | <b>CPM</b>                 | 1368 carboxypeptidase M                                                                       | 2.69                                      | 0.51 |
| 202119_s_at  | <b>CPNE3</b>               | 8895 copine III                                                                               | -3.85                                     | 0.13 |
| 208488_s_at  | <b>CR1</b>                 | 1378 complement component (3b/4b) receptor 1 (Knops blood group)                              | -12.67                                    | 0.00 |
|              | <b>CR1</b> ///             | 1378 complement component (3b/4b) receptor 1 (Knops blood group) ///                          |                                           |      |
|              | <b>CR1L</b> 1379 ///       | (3b/4b) receptor 1-like ///                                                                   |                                           |      |
|              | ///                        | similar to complement component (3b/4b) receptor 1 isoform F precursor                        |                                           |      |
| 239205_s_at  | <b>LOC653907</b> 653907    | component (3b/4b) receptor 1 isoform F precursor                                              | -9.97                                     | 0.13 |
| 209432_s_at  | <b>CREB3</b>               | 10488 cAMP responsive element binding protein 3                                               | 3.49                                      | 0.02 |
| 212345_s_at  | <b>CREB3L2</b>             | 64764 cAMP responsive element binding protein 3-like 2                                        | 9.16                                      | 0.02 |
| 205931_s_at  | <b>CREB5</b>               | 9586 cAMP responsive element binding protein 5                                                | -5.61                                     | 0.00 |
| 201200_at    | <b>CREG1</b>               | 8804 cellular repressor of E1A-stimulated genes 1                                             | 4.85                                      | 0.00 |
| 209967_s_at  | <b>CREM</b>                | 1390 cAMP responsive element modulator                                                        | 57.40                                     | 0.00 |
| 208978_at    | <b>CRIP2</b>               | 1397 cysteine-rich protein 2                                                                  | 2.31                                      | 0.02 |
|              |                            | cysteine-rich secretory protein LCCL domain                                                   |                                           |      |
| 221541_at    | <b>CRISPLD2</b>            | 83716 containing 2                                                                            | -4.63                                     | 0.00 |
| 221139_s_at  | <b>CSAD</b>                | 51380 cysteine sulfinic acid decarboxylase                                                    | -5.64                                     | 0.25 |
| 209716_at    | <b>CSF1</b>                | 1435 colony stimulating factor 1 (macrophage)                                                 | 10.75                                     | 0.16 |
|              |                            | colony stimulating factor 2 receptor, alpha, low-                                             |                                           |      |
| 211287_x_at  | <b>CSF2RA</b>              | 1438 affinity (granulocyte-macrophage)                                                        | -2.86                                     | 0.25 |
| 1553297_a_at | <b>CSF3R</b>               | 1441 colony stimulating factor 3 receptor (granulocyte)                                       | -4.58                                     | 0.00 |
| 227767_at    | <b>CSNK1G3</b>             | 1456 casein kinase 1, gamma 3                                                                 | -3.84                                     | 0.79 |
|              |                            | cystatin C (amyloid angiopathy and cerebral                                                   |                                           |      |
| 201360_at    | <b>CST3</b>                | 1471 hemorrhage)                                                                              | -2.12                                     | 0.08 |
| 210140_at    | <b>CST7</b>                | 8530 cystatin F (leukocystatin)                                                               | -10.76                                    | 0.00 |
|              |                            | cleavage stimulation factor, 3' pre-RNA, subunit 3,                                           |                                           |      |
| 229666_s_at  | <b>CSTF3</b>               | 1479 77kDa                                                                                    | 8.96                                      | 0.02 |
|              | <b>CTA-</b>                |                                                                                               |                                           |      |
| 202937_x_at  | <b>126B4.3</b>             | 27341 CGI-96 protein                                                                          | 3.14                                      | 0.51 |
| 218923_at    | <b>CTBS</b>                | 1486 chitinase, di-N-acetyl-                                                                  | -2.16                                     | 0.13 |
| 202521_at    | <b>CTCF</b>                | 10664 CCCTC-binding factor (zinc finger protein)                                              | -2.32                                     | 0.03 |

|              |                     |            |                                                                                    |        |      |
|--------------|---------------------|------------|------------------------------------------------------------------------------------|--------|------|
|              | <b>CTCFL</b> ///    | 10357 ///  | high-mobility group box 1 ///                                                      |        |      |
|              | <b>HMG1L1</b> ///   | 140690 /// | (nonhistone chromosomal) protein 1-like 1 ///                                      |        |      |
|              | <b>HMG1L6</b> ///   | 3146 ///   | high-mobility group (nonhistone chromosomal)                                       |        |      |
| 216508_x_at  | <b>HMGB1</b>        | 645292     | protein 1-like 6                                                                   | -2.30  | 0.16 |
|              |                     |            | CTD (carboxy-terminal domain, RNA polymerase                                       |        |      |
| 217844_at    | <b>CTDSP1</b>       | 58190      | II, polypeptide A) small phosphatase 1                                             | -3.03  | 0.03 |
|              |                     |            | CTD (carboxy-terminal domain, RNA polymerase                                       |        |      |
| 208735_s_at  | <b>CTDSP2</b>       | 10106      | II, polypeptide A) small phosphatase 2                                             | -5.40  | 0.00 |
|              |                     |            |                                                                                    |        |      |
|              | <b>CTGLF1</b> ///   | 119016 /// | centaurin, gamma-like family, member 1 ///                                         |        |      |
|              | <b>CTGLF3</b> ///   | 119385 /// | KIAA1975 protein similar to MRIP2 ///                                              |        |      |
|              | <b>CTGLF4</b> ///   | 414189 /// | gamma-like family, member 3 ///                                                    |        |      |
|              | <b>CTGLF5</b> ///   | 653268 /// | gamma-like family, member 4 ///                                                    |        |      |
|              | <b>CTGLF9P</b> ///  | 728005 /// | gamma-like family, member 9 pseudogene ///                                         |        |      |
| 221850_x_at  | <b>KIAA1975</b>     | 728404     | centaurin, gamma-like family, member 5                                             | -3.19  | 0.79 |
| 211240_x_at  | <b>CTNND1</b>       | 1500       | catenin (cadherin-associated protein), delta 1                                     | 3.48   | 0.00 |
| 36566_at     | <b>CTNS</b>         | 1497       | cystinosis, nephropathic                                                           | 3.56   | 0.13 |
| 200661_at    | <b>CTSA</b>         | 5476       | cathepsin A                                                                        | 2.11   | 0.02 |
| 200838_at    | <b>CTSB</b>         | 1508       | cathepsin B                                                                        | 10.41  | 0.00 |
| 200766_at    | <b>CTSD</b>         | 1509       | cathepsin D                                                                        | 3.09   | 0.00 |
| 205653_at    | <b>CTSG</b>         | 1511       | cathepsin G                                                                        | -8.65  | 0.79 |
| 202295_s_at  | <b>CTSH</b>         | 1512       | cathepsin H                                                                        | 5.96   | 0.06 |
| 202087_s_at  | <b>CTSL1</b>        | 1514       | cathepsin L1                                                                       | 59.50  | 0.00 |
| 210074_at    | <b>CTSL2</b>        | 1515       | cathepsin L2                                                                       | 7.83   | 0.06 |
| 1563445_x_at | <b>CTSL3</b>        | 1518       | cathepsin L-like 3                                                                 | 9.54   | 0.02 |
| 202157_s_at  | <b>CUGBP2</b>       | 10659      | CUG triplet repeat, RNA binding protein 2                                          | -2.52  | 0.00 |
| 207614_s_at  | <b>CUL1</b>         | 8454       | cullin 1                                                                           | 3.86   | 0.16 |
| 201423_s_at  | <b>CUL4A</b>        | 8451       | cullin 4A                                                                          | 3.63   | 0.13 |
| 202213_s_at  | <b>CUL4B</b>        | 8450       | cullin 4B                                                                          | -4.56  | 0.00 |
| 203533_s_at  | <b>CUL5</b>         | 8065       | cullin 5                                                                           | 2.74   | 0.34 |
| 205898_at    | <b>CX3CR1</b>       | 1524       | chemokine (C-X3-C motif) receptor 1<br>chemokine (C-X-C motif) ligand 1 (melanoma) | -9.57  | 0.00 |
| 204470_at    | <b>CXCL1</b>        | 2919       | growth stimulating activity, alpha)                                                | 2.61   | 0.00 |
| 204533_at    | <b>CXCL10</b>       | 3627       | chemokine (C-X-C motif) ligand 10                                                  | 190.28 | 0.00 |
| 211122_s_at  | <b>CXCL11</b>       | 6373       | chemokine (C-X-C motif) ligand 11                                                  | 55.47  | 0.00 |
| 223454_at    | <b>CXCL16</b>       | 58191      | chemokine (C-X-C motif) ligand 16                                                  | 2.27   | 0.00 |
| 209774_x_at  | <b>CXCL2</b>        | 2920       | chemokine (C-X-C motif) ligand 2                                                   | 7.95   | 0.00 |
| 207850_at    | <b>CXCL3</b>        | 2921       | chemokine (C-X-C motif) ligand 3                                                   | 53.33  | 0.00 |
| 214974_x_at  | <b>CXCL5</b>        | 6374       | chemokine (C-X-C motif) ligand 5                                                   | 50.40  | 0.02 |
| 203915_at    | <b>CXCL9</b>        | 4283       | chemokine (C-X-C motif) ligand 9                                                   | 13.67  | 0.06 |
| 223294_at    | <b>CXorf26</b>      | 51260      | chromosome X open reading frame 26                                                 | 6.95   | 0.51 |
|              |                     |            |                                                                                    |        |      |
|              | <b>CXorf40A</b> /// | 541578 /// | chromosome X open reading frame 40A ///                                            |        |      |
| 214112_s_at  | <b>CXorf40B</b>     | 91966      | chromosome X open reading frame 40B                                                | 2.38   | 0.08 |
| 207843_x_at  | <b>CY5A</b>         | 1528       | cytochrome b5 type A (microsomal)                                                  | 2.55   | 0.13 |
| 224735_at    | <b>CYBASC3</b>      | 220002     | cytochrome b, ascorbate dependent 3<br>cytochrome b-245, beta polypeptide (chronic | 2.84   | 0.34 |
| 203922_s_at  | <b>CYBB</b>         | 1536       | granulomatous disease)                                                             | 6.39   | 0.00 |
| 208905_at    | <b>CYCS</b>         | 54205      | cytochrome c, somatic                                                              | 9.06   | 0.08 |
| 208923_at    | <b>CYFIP1</b>       | 23191      | cytoplasmic FMR1 interacting protein 1                                             | 4.70   | 0.79 |
| 215785_s_at  | <b>CYFIP2</b>       | 26999      | cytoplasmic FMR1 interacting protein 2                                             | -3.37  | 0.34 |

|             |                                    |                    |                                                                                                                       |        |      |
|-------------|------------------------------------|--------------------|-----------------------------------------------------------------------------------------------------------------------|--------|------|
| 214272_at   | <b>CYLD</b>                        | 1540               | cylindromatosis (turban tumor syndrome)<br>cytochrome P450, family 27, subfamily B,                                   | 2.58   | 0.25 |
| 205676_at   | <b>CYP27B1</b>                     | 1594               | polypeptide 1<br>cytochrome P450, family 4, subfamily F,                                                              | 2.27   | 0.06 |
| 206153_at   | <b>CYP4F11</b>                     | 57834              | polypeptide 11<br>cytochrome P450, family 4, subfamily F,                                                             | 2.10   | 0.34 |
| 210452_x_at | <b>CYP4F2</b>                      | 8529               | polypeptide 2<br>cytochrome P450, family 4, subfamily F,                                                              | -7.47  | 0.00 |
| 206514_s_at | <b>CYP4F2</b> ///<br><b>CYP4F3</b> | 4051 ///<br>8529   | polypeptide 3 /// cytochrome P450, family 4,<br>subfamily F, polypeptide 2<br>cytochrome P450, family 4, subfamily F, | -7.73  | 0.00 |
| 206515_at   | <b>CYP4F3</b>                      | 4051               | polypeptide 3                                                                                                         | -8.11  | 0.00 |
| 231747_at   | <b>CYSLTR1</b>                     | 10800              | cysteinyl leukotriene receptor 1                                                                                      | -3.72  | 0.07 |
| 220813_at   | <b>CYSLTR2</b>                     | 57105              | cysteinyl leukotriene receptor 2<br>DNA segment, Chr 15, Wayne State University                                       | -4.78  | 0.16 |
| 212527_at   | <b>D15Wsu75e</b>                   | 27351              | 75, expressed<br>dishevelled associated activator of                                                                  | 4.66   | 0.00 |
| 216060_s_at | <b>DAAM1</b>                       | 23002              | morphogenesis 1<br>disabled homolog 2, mitogen-responsive                                                             | -4.85  | 0.79 |
| 210757_x_at | <b>DAB2</b>                        | 1601               | phosphoprotein (Drosophila)                                                                                           | 4.74   | 0.51 |
| 200046_at   | <b>DAD1</b>                        | 1603               | defender against cell death 1<br>dystroglycan 1 (dystrophin-associated                                                | 2.40   | 0.02 |
| 212128_s_at | <b>DAG1</b>                        | 1605               | glycoprotein 1)                                                                                                       | 2.22   | 0.51 |
| 201095_at   | <b>DAP</b>                         | 1611               | death-associated protein                                                                                              | 2.43   | 0.51 |
| 215184_at   | <b>DAPK2</b>                       | 23604              | death-associated protein kinase 2                                                                                     | -12.13 | 0.00 |
| 201623_s_at | <b>DARS</b>                        | 1615               | aspartyl-tRNA synthetase                                                                                              | 6.05   | 0.02 |
| 218443_s_at | <b>DAZAP1</b>                      | 26528              | DAZ associated protein 1                                                                                              | 4.15   | 0.08 |
| 205818_at   | <b>DBC1</b>                        | 1620               | deleted in bladder cancer 1                                                                                           | -2.14  | 0.34 |
| 223001_at   | <b>DC2</b>                         | 58505              | DC2 protein                                                                                                           | 8.68   | 0.25 |
| 203302_at   | <b>DCK</b>                         | 1633               | deoxycytidine kinase<br>DCP1 decapping enzyme homolog A (S.                                                           | 2.35   | 0.51 |
| 225443_at   | <b>DCP1A</b>                       | 55802              | cerevisiae)                                                                                                           | 3.96   | 0.06 |
| 235258_at   | <b>DCP2</b>                        | 167227             | DCP2 decapping enzyme homolog (S. cerevisiae)                                                                         | -2.95  | 0.07 |
| 242988_at   | <b>DCST2</b>                       | 127579             | DC-STAMP domain containing 2                                                                                          | 2.13   | 0.34 |
| 204296_at   | <b>DCTN1</b>                       | 1639               | dynactin 1 (p150, glued homolog, Drosophila)                                                                          | 17.80  | 0.00 |
| 209231_s_at | <b>DCTN5</b>                       | 84516              | dynactin 5 (p25)                                                                                                      | 3.07   | 0.34 |
| 203261_at   | <b>DCTN6</b>                       | 10671              | dynactin 6<br>DCN1, defective in cullin neddylation 1, domain                                                         | 2.68   | 0.34 |
| 239648_at   | <b>DCUN1D3</b>                     | 123879             | containing 3 (S. cerevisiae)<br>development and differentiation enhancing factor                                      | 18.13  | 0.00 |
| 224796_at   | <b>DDEF1</b>                       | 50807              | 1                                                                                                                     | -2.22  | 0.00 |
| 243705_at   | <b>DDHD1</b>                       | 80821              | DDHD domain containing 1                                                                                              | 2.02   | 0.13 |
| 209383_at   | <b>DDIT3</b>                       | 1649               | DNA-damage-inducible transcript 3                                                                                     | 3.02   | 0.08 |
| 202887_s_at | <b>DDIT4</b>                       | 54541              | DNA-damage-inducible transcript 4                                                                                     | 7.37   | 0.34 |
| 222134_at   | <b>DDO</b>                         | 8528               | D-aspartate oxidase                                                                                                   | 4.87   | 0.79 |
| 230180_at   | <b>DDX17</b>                       | 10521              | DEAD (Asp-Glu-Ala-Asp) box polypeptide 17                                                                             | -2.95  | 0.08 |
| 205763_s_at | <b>DDX18</b>                       | 8886               | DEAD (Asp-Glu-Ala-Asp) box polypeptide 18                                                                             | 7.38   | 0.02 |
| 202577_s_at | <b>DDX19A</b>                      | 55308              | DEAD (Asp-Glu-Ala-As) box polypeptide 19A                                                                             | 2.49   | 0.34 |
| 202576_s_at | <b>DDX19A</b> ///<br><b>DDX19B</b> | 11269 ///<br>55308 | DEAD (Asp-Glu-Ala-As) box polypeptide 19B ///<br>DEAD (Asp-Glu-Ala-As) box polypeptide 19A                            | 6.49   | 0.06 |
| 208152_s_at | <b>DDX21</b>                       | 9188               | DEAD (Asp-Glu-Ala-Asp) box polypeptide 21                                                                             | 7.36   | 0.00 |
| 200694_s_at | <b>DDX24</b>                       | 57062              | DEAD (Asp-Glu-Ala-Asp) box polypeptide 24                                                                             | 3.89   | 0.08 |
| 221780_s_at | <b>DDX27</b>                       | 55661              | DEAD (Asp-Glu-Ala-Asp) box polypeptide 27                                                                             | 3.04   | 0.13 |
| 201584_s_at | <b>DDX39</b>                       | 10212              | DEAD (Asp-Glu-Ala-Asp) box polypeptide 39                                                                             | 11.72  | 0.16 |
| 220890_s_at | <b>DDX47</b>                       | 51202              | DEAD (Asp-Glu-Ala-Asp) box polypeptide 47                                                                             | 5.17   | 0.51 |
| 221699_s_at | <b>DDX50</b>                       | 79009              | DEAD (Asp-Glu-Ala-Asp) box polypeptide 50                                                                             | 2.86   | 0.02 |

|              |                  |                                                                                                  |       |      |
|--------------|------------------|--------------------------------------------------------------------------------------------------|-------|------|
| 210320_s_at  | <b>DDX52</b>     | 11056 DEAD (Asp-Glu-Ala-Asp) box polypeptide 52                                                  | 2.40  | 0.79 |
| 225434_at    | <b>DEDD2</b>     | 162989 death effector domain containing 2<br>differentially expressed in FDCP 6 homolog          | -2.10 | 0.51 |
| 221293_s_at  | <b>DEF6</b>      | 50619 (mouse)<br>differentially expressed in FDCP 8 homolog                                      | -2.86 | 0.34 |
| 225637_at    | <b>DEF8</b>      | 54849 (mouse)                                                                                    | -9.15 | 0.03 |
|              | <b>DEFA1 ///</b> | 1667 ///                                                                                         |       |      |
|              | <b>DEFA3 ///</b> | 1668 /// defensin, alpha 1 /// defensin, alpha 3, neutrophil-                                    |       |      |
| 205033_s_at  | <b>LOC728358</b> | 728358 specific                                                                                  | -3.71 | 0.00 |
| 1568377_x_at | <b>DEFB124</b>   | 245937 defensin, beta 124                                                                        | 2.80  | 0.02 |
| 233166_at    | <b>DEFB126</b>   | 81623 defensin, beta 126                                                                         | -2.04 | 0.16 |
| 221081_s_at  | <b>DENND2D</b>   | 79961 DENN/MADD domain containing 2D                                                             | 8.80  | 0.02 |
| 212975_at    | <b>DENND3</b>    | 22898 DENN/MADD domain containing 3                                                              | -3.41 | 0.03 |
| 1554352_s_at | <b>DENND4A</b>   | 10260 DENN/MADD domain containing 4A                                                             | 11.32 | 0.25 |
| 219402_s_at  | <b>DERL1</b>     | 79139 Der1-like domain family, member 1                                                          | 2.85  | 0.06 |
| 203733_at    | <b>DEXI</b>      | 28955 dexamethasone-induced transcript<br>DNA fragmentation factor, 45kDa, alpha                 | 2.43  | 0.34 |
| 223518_at    | <b>DFFA</b>      | 1676 polypeptide<br>diacylglycerol O-acyltransferase homolog 1                                   | 5.56  | 0.34 |
| 203669_s_at  | <b>DGAT1</b>     | 8694 (mouse)                                                                                     | -6.49 | 0.79 |
| 214198_s_at  | <b>DGCR2</b>     | 9993 DiGeorge syndrome critical region gene 2                                                    | -3.94 | 0.00 |
|              | <b>DGCR6 ///</b> | 8214 /// DiGeorge syndrome critical region gene 6 ///                                            |       |      |
| 208024_s_at  | <b>DGCR6L</b>    | 85359 DiGeorge syndrome critical region gene 6-like                                              | 2.32  | 0.16 |
| 208072_s_at  | <b>DGKD</b>      | 8527 diacylglycerol kinase, delta 130kDa                                                         | -3.86 | 0.08 |
| 1554623_x_at | <b>DGKE</b>      | 8526 diacylglycerol kinase, epsilon 64kDa                                                        | 2.21  | 0.06 |
| 207556_s_at  | <b>DGKZ</b>      | 8525 diacylglycerol kinase, zeta 104kDa                                                          | -4.30 | 0.34 |
| 202534_x_at  | <b>DHFR</b>      | 1719 dihydrofolate reductase<br>dehydrogenase/reductase (SDR family) member                      | -2.76 | 0.51 |
| 204800_s_at  | <b>DHRS12</b>    | 79758 12<br>dehydrogenase/reductase (SDR family) member                                          | -2.23 | 0.51 |
| 226121_at    | <b>DHRS13</b>    | 147015 13<br>Dehydrogenase/reductase (SDR family) member                                         | -4.60 | 0.00 |
| 213868_s_at  | <b>DHRS7</b>     | 51635 7                                                                                          | -3.42 | 0.00 |
| 219799_s_at  | <b>DHRS9</b>     | 10170 dehydrogenase/reductase (SDR family) member 9<br>dehydrogenase E1 and transketolase domain | -2.05 | 0.34 |
| 227094_at    | <b>DHTKD1</b>    | 55526 containing 1                                                                               | -5.22 | 0.16 |
| 201385_at    | <b>DHX15</b>     | 1665 DEAH (Asp-Glu-Ala-His) box polypeptide 15                                                   | 2.79  | 0.34 |
| 223138_s_at  | <b>DHX36</b>     | 170506 DEAH (Asp-Glu-Ala-His) box polypeptide 36                                                 | 4.87  | 0.00 |
| 219364_at    | <b>DHX58</b>     | 79132 DEXH (Asp-Glu-X-His) box polypeptide 58                                                    | 2.89  | 0.79 |
| 205726_at    | <b>DIAPH2</b>    | 1730 diaphanous homolog 2 (Drosophila)                                                           | 5.05  | 0.16 |
| 206061_s_at  | <b>DICER1</b>    | 23405 Dicer1, Dcr-1 homolog (Drosophila)                                                         | -3.49 | 0.00 |
| 226026_at    | <b>DIRC2</b>     | 84925 disrupted in renal carcinoma 2                                                             | -2.69 | 0.08 |
| 222607_s_at  | <b>DIS3</b>      | 22894 DIS3 mitotic control homolog (S. cerevisiae)                                               | 2.37  | 0.79 |
| 206090_s_at  | <b>DISC1</b>     | 27185 disrupted in schizophrenia 1                                                               | -3.01 | 0.51 |
| 216212_s_at  | <b>DKC1</b>      | 1736 dyskeratosis congenita 1, dyskerin                                                          | 3.46  | 0.25 |
|              | <b>DKFZP434B</b> |                                                                                                  |       |      |
| 231886_at    | <b>2016</b>      | 642780 similar to hypothetical protein LOC284701                                                 | -6.27 | 0.00 |
|              | <b>DKFZP434B</b> |                                                                                                  |       |      |
|              | <b>2016 ///</b>  | 642780 ///                                                                                       |       |      |
| 211050_x_at  | <b>LOC643313</b> | 643313 similar to hypothetical protein LOC284701                                                 | -2.20 | 0.00 |
|              | <b>DKFZp547E</b> |                                                                                                  |       |      |
| 235167_at    | <b>087</b>       | 283846 hypothetical gene LOC283846                                                               | -3.07 | 0.07 |

|              |                     |            |                                                                                             |                                    |
|--------------|---------------------|------------|---------------------------------------------------------------------------------------------|------------------------------------|
|              | <b>DKFZp547E</b>    |            |                                                                                             |                                    |
|              | <b>087</b> ///      |            |                                                                                             |                                    |
|              | <b>LOC23117</b> /// |            |                                                                                             |                                    |
|              | <b>LOC440345</b>    |            |                                                                                             |                                    |
|              | ///                 | 23117 ///  |                                                                                             |                                    |
|              | <b>LOC440353</b>    | 283846 /// |                                                                                             |                                    |
|              | ///                 | 440345 /// | KIAA0220-like protein ///                                                                   | hypothetical gene                  |
|              | <b>LOC613037</b>    | 440353 /// | LOC283846 ///                                                                               | hypothetical protein LOC440345 /// |
|              | ///                 | 613037 /// | nuclear pore complex interacting protein                                                    |                                    |
| 211996_s_at  | <b>LOC728888</b>    | 728888     | pseudogene ///                                                                              | similar to Protein KIAA0220        |
|              | <b>087</b> ///      |            |                                                                                             |                                    |
|              | <b>LOC440345</b>    |            |                                                                                             |                                    |
|              | ///                 |            |                                                                                             |                                    |
|              | <b>LOC440354</b>    |            |                                                                                             |                                    |
|              | ///                 | 23049 ///  |                                                                                             |                                    |
|              | <b>LOC595101</b>    | 283846 /// |                                                                                             |                                    |
|              | ///                 | 440345 /// | PI-3-kinase-related kinase SMG-1 ///                                                        | hypothetical                       |
|              | <b>LOC728423</b>    | 440354 /// | gene LOC283846 ///                                                                          | hypothetical protein               |
|              | ///                 | 595101 /// | LOC440345 ///                                                                               | PI-3-kinase-related kinase SMG-1   |
|              | <b>LOC730099</b>    | 728423 /// | pseudogene ///                                                                              | similar to PI-3-kinase-related     |
| 214984_at    | <b>SMG1</b>         | 730099     | kinase SMG-1                                                                                |                                    |
|              | <b>DKFZP564C</b>    |            |                                                                                             |                                    |
| 215953_at    | <b>196</b>          | 284649     | DKFZP564C196 protein                                                                        |                                    |
|              | <b>DKFZp667E</b>    |            |                                                                                             |                                    |
| 236079_at    | <b>0512</b>         | 202025     | hypothetical protein DKFZp667E0512                                                          |                                    |
|              | <b>DKFZp667F</b>    |            |                                                                                             |                                    |
| 1559756_at   | <b>0711</b>         | 399716     | hypothetical protein DKFZp667F0711                                                          |                                    |
|              | <b>DKFZp667G</b>    |            |                                                                                             |                                    |
| 214030_at    | <b>2110</b>         | 131544     | hypothetical protein DKFZp667G2110                                                          |                                    |
|              | <b>DKFZP686E</b>    |            |                                                                                             |                                    |
| 224740_at    | <b>2158</b>         | 643155     | hypothetical protein LOC643155                                                              |                                    |
|              | <b>DKFZp686L</b>    |            |                                                                                             |                                    |
| 231412_at    | <b>14188</b>        | 441366     | hypothetical gene supported by BX538329                                                     |                                    |
| 242854_x_at  | <b>DLEU2</b>        | 8847       | deleted in lymphocytic leukemia, 2                                                          |                                    |
| 1562278_at   | <b>DNAH1</b>        | 25981      | dynein, axonemal, heavy chain 1                                                             |                                    |
| 223054_at    | <b>DNAJB11</b>      | 51726      | DnaJ (Hsp40) homolog, subfamily B, member 11                                                |                                    |
| 202500_at    | <b>DNAJB2</b>       | 3300       | DnaJ (Hsp40) homolog, subfamily B, member 2                                                 |                                    |
| 203811_s_at  | <b>DNAJB4</b>       | 11080      | DnaJ (Hsp40) homolog, subfamily B, member 4                                                 |                                    |
| 1554462_a_at | <b>DNAJB9</b>       | 4189       | DnaJ (Hsp40) homolog, subfamily B, member 9                                                 |                                    |
| 222620_s_at  | <b>DNAJC1</b>       | 64215      | DnaJ (Hsp40) homolog, subfamily C, member 1                                                 |                                    |
| 221782_at    | <b>DNAJC10</b>      | 54431      | DnaJ (Hsp40) homolog, subfamily C, member 10                                                |                                    |
| 218435_at    | <b>DNAJC15</b>      | 29103      | DnaJ (Hsp40) homolog, subfamily C, member 15                                                |                                    |
| 223371_s_at  | <b>DNAJC4</b>       | 3338       | DnaJ (Hsp40) homolog, subfamily C, member 4                                                 |                                    |
| 205545_x_at  | <b>DNAJC8</b>       | 22826      | DnaJ (Hsp40) homolog, subfamily C, member 8                                                 |                                    |
| 201697_s_at  | <b>DNMT1</b>        | 1786       | DNA (cytosine-5-)-methyltransferase 1<br>deoxynucleotidyltransferase, terminal, interacting |                                    |
| 202776_at    | <b>DNTTIP2</b>      | 30836      | protein 2                                                                                   |                                    |
| 219279_at    | <b>DOCK10</b>       | 55619      | dedicator of cytokinesis 10                                                                 |                                    |
| 226875_at    | <b>DOCK11</b>       | 139818     | dedicator of cytokinesis 11                                                                 |                                    |
| 213160_at    | <b>DOCK2</b>        | 1794       | dedicator of cytokinesis 2                                                                  |                                    |

|             |                 |                                                           |        |      |
|-------------|-----------------|-----------------------------------------------------------|--------|------|
| 205003_at   | <b>DOCK4</b>    | 9732 dedicator of cytokinesis 4                           | 6.65   | 0.00 |
| 219921_s_at | <b>DOCK5</b>    | 80005 dedicator of cytokinesis 5                          | -2.36  | 0.00 |
| 212538_at   | <b>DOCK9</b>    | 23348 dedicator of cytokinesis 9                          | -3.57  | 0.51 |
| 208141_s_at | <b>DOHH</b>     | 83475 deoxyhypusine hydroxylase/monooxygenase             | 4.11   | 0.51 |
| 223553_s_at | <b>DOK3</b>     | 79930 docking protein 3                                   | -4.18  | 0.00 |
| 209691_s_at | <b>DOK4</b>     | 55715 docking protein 4                                   | -18.45 | 0.51 |
| 219452_at   | <b>DPEP2</b>    | 64174 dipeptidase 2                                       | -25.63 | 0.00 |
| 220179_at   | <b>DPEP3</b>    | 64180 dipeptidase 3                                       | -14.55 | 0.79 |
| 225195_at   | <b>DPH3</b>     | 285381 DPH3, KTI11 homolog (S. cerevisiae)                | 2.25   | 0.79 |
| 225633_at   | <b>DPY19L3</b>  | 147991 dpy-19-like 3 (C. elegans)                         | -2.58  | 0.79 |
| 218627_at   | <b>DRAM</b>     | 55332 damage-regulated autophagy modulator                | 3.53   | 0.00 |
| 203405_at   | <b>DSCR2</b>    | 8624 Down syndrome critical region gene 2                 | 3.61   | 0.06 |
| 203635_at   | <b>DSCR3</b>    | 10311 Down syndrome critical region gene 3                | 2.67   | 0.00 |
| 218854_at   | <b>DSE</b>      | 29940 dermatan sulfate epimerase                          | 2.60   | 0.00 |
|             |                 | D-tyrosyl-tRNA deacylase 1 homolog (S.                    |        |      |
| 234107_s_at | <b>DTD1</b>     | 92675 cerevisiae)                                         | -2.47  | 0.51 |
| 223445_at   | <b>DTNBP1</b>   | 84062 dystrobrevin binding protein 1                      | 3.96   | 0.00 |
| 212611_at   | <b>DTX4</b>     | 23220 deltex 4 homolog (Drosophila)                       | -5.30  | 0.51 |
| 201041_s_at | <b>DUSP1</b>    | 1843 dual specificity phosphatase 1                       | -5.09  | 0.07 |
| 215501_s_at | <b>DUSP10</b>   | 11221 dual specificity phosphatase 10                     | 24.92  | 0.00 |
| 204794_at   | <b>DUSP2</b>    | 1844 dual specificity phosphatase 2                       | 9.62   | 0.06 |
|             |                 | dual specificity phosphatase 3 (vaccinia virus            |        |      |
| 201537_s_at | <b>DUSP3</b>    | 1845 phosphatase VH1-related)                             | 2.85   | 0.00 |
| 209457_at   | <b>DUSP5</b>    | 1847 dual specificity phosphatase 5                       | 46.54  | 0.00 |
| 208956_x_at | <b>DUT</b>      | 1854 dUTP pyrophosphatase                                 | -2.29  | 0.34 |
| 57532_at    | <b>DVL2</b>     | 1856 dishevelled, dsh homolog 2 (Drosophila)              | 4.49   | 0.34 |
| 211684_s_at | <b>DYNC1I2</b>  | 1781 dynein, cytoplasmic 1, intermediate chain 2          | 5.54   | 0.79 |
| 203303_at   | <b>DYNLT3</b>   | 6990 dynein, light chain, Tctex-type 3                    | 11.41  | 0.00 |
|             |                 | dysferlin, limb girdle muscular dystrophy 2B              |        |      |
| 218660_at   | <b>DYSF</b>     | 8291 (autosomal recessive)                                | -5.12  | 0.13 |
| 241713_s_at | <b>DYX1C1</b>   | 161582 dyslexia susceptibility 1 candidate 1              | -7.66  | 0.79 |
| 203957_at   | <b>E2F6</b>     | 1876 E2F transcription factor 6                           | 5.46   | 0.16 |
| 226952_at   | <b>EAF1</b>     | 85403 ELL associated factor 1                             | 2.87   | 0.00 |
| 202623_at   | <b>EAPP</b>     | 55837 E2F-associated phosphoprotein                       | -2.80  | 0.25 |
|             |                 | Epstein-Barr virus induced gene 2 (lymphocyte-            |        |      |
| 205419_at   | <b>EBI2</b>     | 1880 specific G protein-coupled receptor)                 | -3.22  | 0.34 |
| 219424_at   | <b>EBI3</b>     | 10148 Epstein-Barr virus induced gene 3                   | 5.89   | 0.00 |
| 201323_at   | <b>EBNA1BP2</b> | 10969 EBNA1 binding protein 2                             | 5.03   | 0.34 |
|             |                 | enoyl Coenzyme A hydratase, short chain, 1,               |        |      |
| 201135_at   | <b>ECHS1</b>    | 1892 mitochondrial                                        | 3.98   | 0.51 |
|             |                 | ER degradation enhancer, mannosidase alpha-               |        |      |
| 203279_at   | <b>EDEM1</b>    | 9695 like 1                                               | 5.66   | 0.06 |
|             |                 | ER degradation enhancer, mannosidase alpha-               |        |      |
| 218282_at   | <b>EDEM2</b>    | 55741 like 2                                              | 2.41   | 0.51 |
| 209059_s_at | <b>EDF1</b>     | 8721 endothelial differentiation-related factor 1         | 2.23   | 0.02 |
|             |                 | endothelial differentiation, lysophosphatidic acid G-     |        |      |
| 204038_s_at | <b>EDG2</b>     | 1902 protein-coupled receptor, 2                          | 5.03   | 0.00 |
|             |                 | endothelial differentiation, lysophosphatidic acid G-     |        |      |
| 206723_s_at | <b>EDG4</b>     | 9170 protein-coupled receptor, 4                          | -4.49  | 0.00 |
|             |                 | endothelial differentiation, sphingolipid G-protein-      |        |      |
| 227684_at   | <b>EDG5</b>     | 9294 coupled receptor, 5                                  | 8.14   | 0.34 |
|             |                 | endothelial differentiation, lysophosphatidic acid G-     |        |      |
| 206437_at   | <b>EDG6</b>     | 8698 protein-coupled receptor, 6                          | -21.46 | 0.03 |
|             |                 | endothelial differentiation, sphingolipid G-protein-      |        |      |
| 230464_at   | <b>EDG8</b>     | 53637 coupled receptor, 8                                 | 16.61  | 0.06 |
| 222802_at   | <b>EDN1</b>     | 1906 endothelin 1                                         | 60.51  | 0.00 |
| 204905_s_at | <b>EEF1E1</b>   | 9521 eukaryotic translation elongation factor 1 epsilon 1 | 2.00   | 0.34 |

|             |                    |                                                                                                                     |        |      |
|-------------|--------------------|---------------------------------------------------------------------------------------------------------------------|--------|------|
| 204102_s_at | <b>EEF2</b>        | 1938 eukaryotic translation elongation factor 2                                                                     | 2.45   | 0.34 |
| 233375_at   | <b>EFCAB2</b>      | 84288 EF-hand calcium binding domain 2                                                                              | 3.10   | 0.02 |
| 220523_at   | <b>EFHC2</b>       | 80258 EF-hand domain (C-terminal) containing 2                                                                      | -5.20  | 0.07 |
| 221497_x_at | <b>EGLN1</b>       | 54583 egl nine homolog 1 (C. elegans)<br>early growth response 2 (Krox-20 homolog,                                  | -14.39 | 0.00 |
| 205249_at   | <b>EGR2</b>        | 1959 Drosophila)                                                                                                    | 19.50  | 0.00 |
| 206115_at   | <b>EGR3</b>        | 1960 early growth response 3                                                                                        | 17.08  | 0.00 |
| 209536_s_at | <b>EHD4</b>        | 30844 EH-domain containing 4                                                                                        | 9.37   | 0.00 |
| 216396_s_at | <b>EI24</b>        | 9538 etoposide induced 2.4 mRNA<br>eukaryotic translation initiation factor 1A, X-linked                            | 2.49   | 0.79 |
|             | <b>EIF1AP1</b> /// | 1964 ///                                                                                                            |        |      |
| 201019_s_at | <b>EIF1AX</b>      | 280661 pseudogene 1                                                                                                 | 4.62   | 0.06 |
| 201738_at   | <b>EIF1B</b>       | 10289 eukaryotic translation initiation factor 1B                                                                   | 2.06   | 0.00 |
| 223015_at   | <b>EIF2A</b>       | 83939 eukaryotic translation initiation factor 2A, 65kDa<br>eukaryotic translation initiation factor 2B, subunit 5  | 4.80   | 0.16 |
| 212351_at   | <b>EIF2B5</b>      | 8893 epsilon, 82kDa                                                                                                 | 3.77   | 0.34 |
| 213310_at   | <b>EIF2C2</b>      | 27161 Eukaryotic translation initiation factor 2C, 2                                                                | -5.33  | 0.08 |
| 227930_at   | <b>EIF2C4</b>      | 192670 eukaryotic translation initiation factor 2C, 4<br>eukaryotic translation initiation factor 2, subunit 1      | -6.84  | 0.00 |
| 201144_s_at | <b>EIF2S1</b>      | 1965 alpha, 35kDa<br>eukaryotic translation initiation factor 2, subunit 2                                          | 7.47   | 0.00 |
| 208726_s_at | <b>EIF2S2</b>      | 8894 beta, 38kDa                                                                                                    | 3.60   | 0.02 |
| 200595_s_at | <b>EIF3A</b>       | 8661 eukaryotic translation initiation factor 3, subunit A                                                          | 2.14   | 0.00 |
| 208688_x_at | <b>EIF3B</b>       | 8662 eukaryotic translation initiation factor 3, subunit B<br>eukaryotic translation initiation factor 3, subunit C | 4.26   | 0.34 |
|             | <b>EIF3C</b> ///   | 728689 ///                                                                                                          |        |      |
| 210949_s_at | <b>EIF3CL</b>      | 8663 C-like                                                                                                         | 4.66   | 0.02 |
| 208697_s_at | <b>EIF3E</b>       | 3646 eukaryotic translation initiation factor 3, subunit E                                                          | 2.92   | 0.08 |
| 201592_at   | <b>EIF3H</b>       | 8667 eukaryotic translation initiation factor 3, subunit H                                                          | 2.41   | 0.00 |
| 208756_at   | <b>EIF3I</b>       | 8668 eukaryotic translation initiation factor 3, subunit I                                                          | 4.71   | 0.08 |
| 208985_s_at | <b>EIF3J</b>       | 8669 eukaryotic translation initiation factor 3, subunit J                                                          | 7.28   | 0.02 |
|             | <b>EIF3J</b> ///   | 730021 ///                                                                                                          |        |      |
| 217364_x_at | <b>LOC730021</b>   | 8669 hypothetical protein LOC730021                                                                                 | 3.88   | 0.13 |
| 202231_at   | <b>EIF3M</b>       | 10480 eukaryotic translation initiation factor 3, subunit M<br>eukaryotic translation initiation factor 4A, isoform | 3.09   | 0.08 |
| 201530_x_at | <b>EIF4A1</b>      | 1973 1<br>eukaryotic translation initiation factor 4A, isoform                                                      | 4.41   | 0.00 |
| 201303_at   | <b>EIF4A3</b>      | 9775 3                                                                                                              | 4.23   | 0.06 |
| 201437_s_at | <b>EIF4E</b>       | 1977 eukaryotic translation initiation factor 4E<br>eukaryotic translation initiation factor 4E family              | 2.33   | 0.00 |
| 213571_s_at | <b>EIF4E2</b>      | 9470 member 2                                                                                                       | 2.22   | 0.34 |
| 208624_s_at | <b>EIF4G1</b>      | 1981 eukaryotic translation initiation factor 4 gamma, 1                                                            | 3.33   | 0.00 |
| 208708_x_at | <b>EIF5</b>        | 1983 eukaryotic translation initiation factor 5                                                                     | 2.90   | 0.00 |
| 213757_at   | <b>EIF5A</b>       | 1984 Eukaryotic translation initiation factor 5A                                                                    | 2.67   | 0.00 |
| 220198_s_at | <b>EIF5A2</b>      | 56648 eukaryotic translation initiation factor 5A2                                                                  | 3.28   | 0.25 |
| 201024_x_at | <b>EIF5B</b>       | 9669 eukaryotic translation initiation factor 5B                                                                    | 4.74   | 0.00 |
| 222869_s_at | <b>ELAC1</b>       | 55520 elaC homolog 1 (E. coli)                                                                                      | 2.51   | 0.16 |
| 210376_x_at | <b>ELK1</b>        | 2002 ELK1, member of ETS oncogene family                                                                            | 4.78   | 0.02 |
| 226099_at   | <b>ELL2</b>        | 22936 elongation factor, RNA polymerase II, 2                                                                       | 2.30   | 0.25 |
| 219517_at   | <b>ELL3</b>        | 80237 elongation factor RNA polymerase II-like 3                                                                    | 2.01   | 0.79 |



|              |                  |                                                                                                         |        |      |
|--------------|------------------|---------------------------------------------------------------------------------------------------------|--------|------|
| 204513_s_at  | <b>ELMO1</b>     | 9844 engulfment and cell motility 1<br>elastin (supravalvular aortic stenosis, Williams-                | -3.91  | 0.79 |
| 212670_at    | <b>ELN</b>       | 2006 Beuren syndrome)                                                                                   | 2.95   | 0.06 |
| 227075_at    | <b>ELP3</b>      | 55140 elongation protein 3 homolog (S. cerevisiae)                                                      | 2.23   | 0.25 |
| 209477_at    | <b>EMD</b>       | 2010 emerin (Emery-Dreifuss muscular dystrophy)                                                         | 2.44   | 0.00 |
| 209233_at    | <b>EMG1</b>      | 10436 EMG1 nucleolar protein homolog (S. cerevisiae)                                                    | 2.28   | 0.34 |
| 204398_s_at  | <b>EML2</b>      | 24139 echinoderm microtubule associated protein like 2                                                  | 5.13   | 0.00 |
| 220386_s_at  | <b>EML4</b>      | 27436 echinoderm microtubule associated protein like 4                                                  | 2.05   | 0.00 |
| 201324_at    | <b>EMP1</b>      | 2012 epithelial membrane protein 1<br>egf-like module containing, mucin-like, hormone                   | 27.67  | 0.13 |
| 210724_at    | <b>EMR3</b>      | 84658 receptor-like 3                                                                                   | -6.60  | 0.00 |
| 201231_s_at  | <b>ENO1</b>      | 2023 enolase 1, (alpha)                                                                                 | 3.88   | 0.06 |
| 204845_s_at  | <b>ENPEP</b>     | 2028 glutamyl aminopeptidase (aminopeptidase A)<br>ectonucleoside triphosphate diphosphohydrolase       | -3.59  | 0.34 |
| 209473_at    | <b>ENTPD1</b>    | 953 1                                                                                                   | -7.36  | 0.00 |
| 211776_s_at  | <b>EPB41L3</b>   | 23136 erythrocyte membrane protein band 4.1-like 3                                                      | 5.61   | 0.79 |
| 202894_at    | <b>EPHB4</b>     | 2050 EPH receptor B4                                                                                    | -22.21 | 0.00 |
| 232164_s_at  | <b>EPPK1</b>     | 83481 epiplakin 1                                                                                       | 2.39   | 0.34 |
| 218180_s_at  | <b>EPS8L2</b>    | 64787 EPS8-like 2                                                                                       | -2.00  | 0.34 |
| 227609_at    | <b>EPSTI1</b>    | 94240 epithelial stromal interaction 1 (breast)<br>endoplasmic reticulum-golgi intermediate             | 6.67   | 0.00 |
| 223847_s_at  | <b>ERGIC1</b>    | 57222 compartment (ERGIC) 1                                                                             | -2.34  | 0.00 |
| 1563315_s_at | <b>ERICH1</b>    | 157697 glutamate-rich 1                                                                                 | -3.30  | 0.07 |
| 202441_at    | <b>ERLIN1</b>    | 10613 ER lipid raft associated 1                                                                        | 4.79   | 0.00 |
| 222646_s_at  | <b>ERO1L</b>     | 30001 ERO1-like (S. cerevisiae)<br>ESF1, nucleolar pre-rRNA processing protein,                         | -2.04  | 0.51 |
| 218859_s_at  | <b>ESF1</b>      | 51575 homolog (S. cerevisiae)                                                                           | 2.80   | 0.34 |
| 201574_at    | <b>ETF1</b>      | 2107 eukaryotic translation termination factor 1<br>electron-transfer-flavoprotein, alpha polypeptide   | 2.64   | 0.00 |
| 201931_at    | <b>ETFA</b>      | 2108 (glutaric aciduria II)                                                                             | 2.17   | 0.34 |
| 33494_at     | <b>ETFDH</b>     | 2110 electron-transferring-flavoprotein dehydrogenase                                                   | 2.71   | 0.79 |
| 219017_at    | <b>ETNK1</b>     | 55500 ethanolamine kinase 1<br>v-ets erythroblastosis virus E26 oncogene                                | 8.03   | 0.00 |
| 201328_at    | <b>ETS2</b>      | 2114 homolog 2 (avian)                                                                                  | 3.62   | 0.06 |
| 224225_s_at  | <b>ETV7</b>      | 51513 ets variant gene 7 (TEL2 oncogene)                                                                | 17.49  | 0.00 |
| 211742_s_at  | <b>EVI2B</b>     | 2124 ecotropic viral integration site 2B                                                                | -4.11  | 0.00 |
| 208297_s_at  | <b>EVI5</b>      | 7813 ecotropic viral integration site 5                                                                 | -4.96  | 0.08 |
| 210011_s_at  | <b>EWSR1</b>     | 2130 Ewing sarcoma breakpoint region 1                                                                  | 2.01   | 0.02 |
| 211825_s_at  | <b>EWSR1 ///</b> | 2130 /// Ewing sarcoma breakpoint region 1 /// Friend                                                   |        |      |
| 58696_at     | <b>FLI1</b>      | 2313 leukemia virus integration 1                                                                       | -4.36  | 0.07 |
| 227696_at    | <b>EXOSC4</b>    | 54512 exosome component 4                                                                               | 4.11   | 0.00 |
| 212627_s_at  | <b>EXOSC6</b>    | 118460 Exosome component 6                                                                              | 2.88   | 0.51 |
| 205061_s_at  | <b>EXOSC7</b>    | 23016 exosome component 7                                                                               | 4.06   | 0.16 |
| 209202_s_at  | <b>EXOSC9</b>    | 5393 exosome component 9                                                                                | 3.15   | 0.25 |
| 226170_at    | <b>EXTL3</b>     | 2137 exostoses (multiple)-like 3                                                                        | -2.63  | 0.03 |
| 203249_at    | <b>EYA3</b>      | 2140 eyes absent homolog 3 (Drosophila)                                                                 | 3.08   | 0.06 |
| 203358_s_at  | <b>EZH1</b>      | 2145 enhancer of zeste homolog 1 (Drosophila)                                                           | -7.82  | 0.03 |
| 226482_s_at  | <b>EZH2</b>      | 2146 enhancer of zeste homolog 2 (Drosophila)                                                           | 15.55  | 0.00 |
| 204363_at    | <b>F11R</b>      | 50848 F11 receptor<br>coagulation factor III (thromboplastin, tissue                                    | -2.59  | 0.13 |
| 231029_at    | <b>F3</b>        | 2152 factor)                                                                                            | 36.23  | 0.00 |
| 203274_at    | <b>F5</b>        | 2153 coagulation factor V (proaccelerin, labile factor)<br>coagulation factor VIII-associated (intronic | -28.44 | 0.07 |
|              | <b>F8A1</b>      | 8263 transcript) 1                                                                                      | -2.20  | 0.51 |

|              |                   |                                                     |                                                      |                                                   |
|--------------|-------------------|-----------------------------------------------------|------------------------------------------------------|---------------------------------------------------|
|              | <b>FABP5</b> ///  | fatty acid binding protein 5 (psoriasis-associated) |                                                      |                                                   |
|              | <b>LOC728641</b>  | 2171 ///                                            | /// similar to Fatty acid-binding protein, epidermal |                                                   |
|              |                   | ///                                                 | 728641 ///                                           | (E-FABP) (Psoriasis-associated fatty acid-binding |
| 202345_s_at  | <b>LOC729163</b>  | 729163                                              | protein homolog) (PA-FABP)                           | 10.46 0.08                                        |
| 202535_at    | <b>FADD</b>       | 8772                                                | Fas (TNFRSF6)-associated via death domain            | -3.24 0.07                                        |
| 226905_at    | <b>FAM101B</b>    | 359845                                              | family with sequence similarity 101, member B        | -5.21 0.00                                        |
| 221249_s_at  | <b>FAM117A</b>    | 81558                                               | family with sequence similarity 117, member A        | -4.45 0.16                                        |
| 226475_at    | <b>FAM118A</b>    | 55007                                               | family with sequence similarity 118, member A        | -3.39 0.51                                        |
| 1555948_s_at | <b>FAM120A</b>    | 23196                                               | family with sequence similarity 120A                 | -2.37 0.00                                        |
| 1556643_at   | <b>FAM125A</b>    | 93343                                               | Family with sequence similarity 125, member A        | 2.41 0.13                                         |
| 1554178_a_at | <b>FAM126B</b>    | 285172                                              | family with sequence similarity 126, member B        | -2.13 0.00                                        |
| 212697_at    | <b>FAM134C</b>    | 162427                                              | family with sequence similarity 134, member C        | -2.15 0.07                                        |
| 218446_s_at  | <b>FAM18B</b>     | 51030                                               | family with sequence similarity 18, member B         | 2.91 0.25                                         |
|              | <b>FAM21A</b> /// | 387680 ///                                          | family with sequence similarity 21, member B ///     |                                                   |
| 212370_x_at  | <b>FAM21B</b>     | 55747                                               | family with sequence similarity 21, member A         | 4.10 0.00                                         |
|              | <b>FAM21A</b> /// | 253725 ///                                          | family with sequence similarity 21, member B ///     |                                                   |
|              | <b>FAM21B</b> /// | 387680 ///                                          | family with sequence similarity 21, member C ///     |                                                   |
|              | <b>FAM21C</b> /// | 55747 ///                                           | family with sequence similarity 21, member A ///     |                                                   |
| 214946_x_at  | <b>FAM21D</b>     | 653450                                              | family with sequence similarity 21, member D         | 3.47 0.02                                         |
|              | <b>FAM21C</b> /// | 253725 ///                                          | family with sequence similarity 21, member C ///     |                                                   |
| 211068_x_at  | <b>FAM21D</b>     | 653450                                              | family with sequence similarity 21, member D         | 3.43 0.00                                         |
| 228362_s_at  | <b>FAM26F</b>     | 441168                                              | Family with sequence similarity 26, member F         | 8.58 0.00                                         |
| 227194_at    | <b>FAM3B</b>      | 54097                                               | family with sequence similarity 3, member B          | -2.09 0.07                                        |
|              | <b>FAM41C</b> /// |                                                     |                                                      |                                                   |
|              | <b>MGC70863</b>   | 118433 ///                                          | ribosomal protein L23a pseudogene 7 ///              | family                                            |
|              |                   | ///                                                 | 284593 ///                                           | with sequence similarity 41, member C ///         |
|              |                   | ///                                                 | similar                                              |                                                   |
| 232899_at    | <b>RPL23AP7</b>   | 284942                                              | to RPL23AP7 protein                                  | -2.84 0.03                                        |
| 235009_at    | <b>FAM44A</b>     | 259282                                              | family with sequence similarity 44, member A         | -2.12 0.00                                        |
| 225030_at    | <b>FAM44B</b>     | 91272                                               | family with sequence similarity 44, member B         | 5.46 0.08                                         |
| 225351_at    | <b>FAM45A</b>     | 404636                                              | family with sequence similarity 45, member A         | -5.95 0.00                                        |
|              |                   |                                                     | family with sequence similarity 45, member B ///     |                                                   |
|              | <b>FAM45A</b> /// | 404636 ///                                          | family with sequence similarity 45, member A ///     |                                                   |
|              | <b>FAM45B</b> /// | 55855 ///                                           | similar to family with sequence similarity 45,       |                                                   |
| 221804_s_at  | <b>LOC731832</b>  | 731832                                              | member A                                             | -11.02 0.00                                       |
| 226330_s_at  | <b>FAM48A</b>     | 55578                                               | family with sequence similarity 48, member A         | -2.91 0.34                                        |
| 209683_at    | <b>FAM49A</b>     | 81553                                               | family with sequence similarity 49, member A         | -3.62 0.00                                        |
| 203262_s_at  | <b>FAM50A</b>     | 9130                                                | family with sequence similarity 50, member A         | 3.48 0.06                                         |
| 203206_at    | <b>FAM53B</b>     | 9679                                                | family with sequence similarity 53, member B         | -4.11 0.08                                        |
| 218023_s_at  | <b>FAM53C</b>     | 51307                                               | family with sequence similarity 53, member C         | -2.51 0.03                                        |
| 220147_s_at  | <b>FAM60A</b>     | 58516                                               | family with sequence similarity 60, member A         | 2.42 0.51                                         |
|              | <b>FAM60A</b> /// |                                                     |                                                      |                                                   |
|              | <b>LOC650369</b>  | 58516 ///                                           | family with sequence similarity 60, member A ///     |                                                   |
|              |                   | ///                                                 | 650369 ///                                           | similar to teratocarcinoma expressed, serine rich |
| 223038_s_at  | <b>LOC728115</b>  | 728115                                              | /// similar to Protein FAM60A (Tera protein)         | 2.50 0.51                                         |
| 221856_s_at  | <b>FAM63A</b>     | 55793                                               | family with sequence similarity 63, member A         | -3.93 0.00                                        |
| 1553749_at   | <b>FAM76B</b>     | 143684                                              | family with sequence similarity 76, member B         | 2.40 0.06                                         |
| 229764_at    | <b>FAM79B</b>     | 285386                                              | family with sequence similarity 79, member B         | 2.62 0.51                                         |
| 242870_at    | <b>FAM80B</b>     | 57494                                               | Family with sequence similarity 80, member B         | 8.86 0.00                                         |
| 218126_at    | <b>FAM82C</b>     | 55177                                               | family with sequence similarity 82, member C         | 2.46 0.51                                         |
| 1564204_at   | <b>FAM91A2</b>    | 57234                                               | family with sequence similarity 91, member A2        | -2.43 0.13                                        |
| 218074_at    | <b>FAM96B</b>     | 51647                                               | family with sequence similarity 96, member B         | 2.59 0.25                                         |
| 236029_at    | <b>FAT3</b>       | 120114                                              | FAT tumor suppressor homolog 3 (Drosophila)          | 2.31 0.51                                         |

|              |                   |                                                                                                                                                                                                                   |        |      |
|--------------|-------------------|-------------------------------------------------------------------------------------------------------------------------------------------------------------------------------------------------------------------|--------|------|
| 211623_s_at  | <b>FBL</b>        | 2091 fibrillarlin                                                                                                                                                                                                 | 5.28   | 0.00 |
| 215717_s_at  | <b>FBN2</b>       | 2201 fibrillin 2 (congenital contractural arachnodactyly)                                                                                                                                                         | 2.72   | 0.08 |
| 209696_at    | <b>FBP1</b>       | 2203 fructose-1,6-bisphosphatase 1                                                                                                                                                                                | 19.58  | 0.02 |
| 226215_s_at  | <b>FBXL10</b>     | 84678 F-box and leucine-rich repeat protein 10                                                                                                                                                                    | 2.68   | 0.79 |
| 235089_at    | <b>FBXL20</b>     | 84961 F-box and leucine-rich repeat protein 20                                                                                                                                                                    | -39.94 | 0.34 |
| 225132_at    | <b>FBXL3</b>      | 26224 F-box and leucine-rich repeat protein 3                                                                                                                                                                     | -2.67  | 0.07 |
| 225736_at    | <b>FBXO22</b>     | 26263 F-box protein 22                                                                                                                                                                                            | 2.71   | 0.25 |
| 227521_at    | <b>FBXO33</b>     | 254170 F-box protein 33                                                                                                                                                                                           | -5.04  | 0.16 |
| 212987_at    | <b>FBXO9</b>      | 26268 F-box protein 9                                                                                                                                                                                             | -2.34  | 0.16 |
| 1554899_s_at | <b>FCER1G</b>     | 2207 Fc fragment of IgE, high affinity I, receptor for; gamma polypeptide                                                                                                                                         | 2.42   | 0.00 |
| 206759_at    | <b>FCER2</b>      | 2208 (CD23) Fc fragment of IgE, low affinity II, receptor for                                                                                                                                                     | 8.33   | 0.25 |
| 216950_s_at  | <b>FCGR1A</b>     | 2209 (CD64) Fc fragment of IgG, high affinity Ia, receptor                                                                                                                                                        | 4.79   | 0.00 |
| 214511_x_at  | <b>FCGR1B</b>     | 2210 (CD64) Fc fragment of IgG, high affinity Ib, receptor                                                                                                                                                        | 3.82   | 0.00 |
| 211395_x_at  | <b>FCGR2C</b>     | 9103 (CD32) Fc fragment of IgG, low affinity IIc, receptor for                                                                                                                                                    | -2.29  | 0.00 |
|              |                   | Fc fragment of IgG, low affinity IIIa, receptor                                                                                                                                                                   |        |      |
| 204006_s_at  | <b>FCGR3A</b> /// | 2214 /// (CD16a) /// Fc fragment of IgG, low affinity IIIb,                                                                                                                                                       |        |      |
| 218831_s_at  | <b>FCGR3B</b>     | 2215 receptor (CD16b)                                                                                                                                                                                             | -2.85  | 0.00 |
| 228220_at    | <b>FCGRT</b>      | 2217 Fc fragment of IgG, receptor, transporter, alpha                                                                                                                                                             | -3.93  | 0.00 |
| 203620_s_at  | <b>FCHO2</b>      | 115548 FCH domain only 2                                                                                                                                                                                          | -11.67 | 0.13 |
|              | <b>FCHSD2</b>     | 9873 FCH and double SH3 domains 2                                                                                                                                                                                 | 2.13   | 0.06 |
| 205237_at    | <b>FCN1</b>       | 2219 ficolin (collagen/fibrinogen domain containing) 1                                                                                                                                                            | -3.84  | 0.07 |
| 203646_at    | <b>FDX1</b>       | 2230 ferredoxin 1                                                                                                                                                                                                 | 3.79   | 0.34 |
| 201798_s_at  | <b>FER1L3</b>     | 26509 fer-1-like 3, myoferlin (C. elegans) fasciculation and elongation protein zeta 1 (zygin                                                                                                                     | 35.63  | 0.16 |
| 203562_at    | <b>FEZ1</b>       | 9638 l)                                                                                                                                                                                                           | 2.44   | 0.79 |
| 1555407_s_at | <b>FGD3</b>       | 89846 FYVE, RhoGEF and PH domain containing 3                                                                                                                                                                     | -5.54  | 0.03 |
| 230559_x_at  | <b>FGD4</b>       | 121512 FYVE, RhoGEF and PH domain containing 4                                                                                                                                                                    | -2.39  | 0.79 |
| 219901_at    | <b>FGD6</b>       | 55785 FYVE, RhoGEF and PH domain containing 6                                                                                                                                                                     | 2.71   | 0.25 |
| 205110_s_at  | <b>FGF13</b>      | 2258 fibroblast growth factor 13                                                                                                                                                                                  | 13.30  | 0.16 |
| 1556283_s_at | <b>FGFR1OP2</b>   | 26127 FGFR1 oncogene partner 2 fibroblast growth factor receptor 2 (bacteria-expressed kinase, keratinocyte growth factor receptor, craniofacial dysostosis 1, Crouzon syndrome, Pfeiffer syndrome, Jackson-Weiss | 5.14   | 0.02 |
| 208229_at    | <b>FGFR2</b>      | 2263 syndrome)                                                                                                                                                                                                    | 3.93   | 0.08 |
| 204834_at    | <b>FGL2</b>       | 10875 fibrinogen-like 2                                                                                                                                                                                           | -3.03  | 0.00 |
| 203033_x_at  | <b>FH</b>         | 2271 fumarate hydratase                                                                                                                                                                                           | 3.65   | 0.06 |
| 203391_at    | <b>FKBP2</b>      | 2286 FK506 binding protein 2, 13kDa                                                                                                                                                                               | 5.46   | 0.00 |
| 200894_s_at  | <b>FKBP4</b>      | 2288 FK506 binding protein 4, 59kDa                                                                                                                                                                               | 5.00   | 0.00 |
| 224856_at    | <b>FKBP5</b>      | 2289 FK506 binding protein 5                                                                                                                                                                                      | -4.75  | 0.00 |
| 40850_at     | <b>FKBP8</b>      | 23770 FK506 binding protein 8, 38kDa                                                                                                                                                                              | -5.39  | 0.16 |
| 1552664_at   | <b>FLCN</b>       | 201163 folliculin                                                                                                                                                                                                 | 2.36   | 0.02 |
| 210786_s_at  | <b>FLI1</b>       | 2313 Friend leukemia virus integration 1                                                                                                                                                                          | -3.91  | 0.00 |
| 222065_s_at  | <b>FLII</b>       | 2314 flightless I homolog (Drosophila)                                                                                                                                                                            | -3.38  | 0.03 |
|              | <b>FLII</b> ///   | 2314 /// flightless I homolog (Drosophila) /// lethal giant                                                                                                                                                       |        |      |
| 227302_s_at  | <b>LLGL1</b>      | 3996 larvae homolog 1 (Drosophila)                                                                                                                                                                                | -2.31  | 0.25 |
| 224318_s_at  | <b>FLJ10081</b>   | 55683 hypothetical protein FLJ10081                                                                                                                                                                               | 2.91   | 0.13 |
| 218038_at    | <b>FLJ10241</b>   | 55101 hypothetical protein FLJ10241                                                                                                                                                                               | 2.76   | 0.51 |
| 237954_x_at  | <b>FLJ10357</b>   | 55701 Hypothetical protein FLJ10357                                                                                                                                                                               | -20.85 | 0.00 |
| 1562904_s_at | <b>FLJ10661</b>   | 286042 similar to CG7889-PA                                                                                                                                                                                       | -2.62  | 0.79 |
| 222686_s_at  | <b>FLJ11151</b>   | 55313 hypothetical protein FLJ11151                                                                                                                                                                               | -9.50  | 0.00 |

|              |                 |                                                     |        |      |
|--------------|-----------------|-----------------------------------------------------|--------|------|
| 202852_s_at  | <b>FLJ11506</b> | 79719 hypothetical protein FLJ11506                 | 3.69   | 0.13 |
| 1555486_a_at | <b>FLJ14213</b> | 79899 hypothetical protein FLJ14213                 | 11.20  | 0.00 |
| 218986_s_at  | <b>FLJ20035</b> | 55601 hypothetical protein FLJ20035                 | 6.65   | 0.00 |
| 220467_at    | <b>FLJ21272</b> | 80100 hypothetical protein FLJ21272                 | 6.93   | 0.00 |
| 218454_at    | <b>FLJ22662</b> | 79887 hypothetical protein FLJ22662                 | -7.21  | 0.00 |
| 220674_at    | <b>FLJ22814</b> | 79978 hypothetical protein FLJ22814                 | 5.50   | 0.51 |
| 230561_s_at  | <b>FLJ23861</b> | 151050 hypothetical protein FLJ23861                | 2.18   | 0.51 |
| 1553797_a_at | <b>FLJ30594</b> | 150622 hypothetical locus FLJ30594                  | -2.55  | 0.16 |
| 1564157_at   | <b>FLJ33544</b> | 728283 hypothetical protein LOC728283               | 2.73   | 0.00 |
| 1562217_at   | <b>FLJ34521</b> | 646383 hypothetical protein LOC646383               | -4.08  | 0.25 |
| 212547_at    | <b>FLJ35348</b> | 266655 FLJ35348                                     | -7.00  | 0.16 |
| 231698_at    | <b>FLJ36848</b> | 647115 hypothetical LOC647115                       | 4.88   | 0.02 |
| 235235_s_at  | <b>FLJ36874</b> | 219988 FLJ36874 protein                             | 2.44   | 0.06 |
| 1565806_at   | <b>FLJ37035</b> | 399821 FLJ37035 protein                             | 2.74   | 0.34 |
|              |                 | similar to Contactin-associated protein-like 3      |        |      |
| 244065_at    | <b>FLJ37512</b> | 643792 precursor (Cell recognition molecule Caspr3) | -9.01  | 0.34 |
| 230999_at    | <b>FLJ39051</b> | 399972 Hypothetical gene supported by AK096370      | -4.77  | 0.13 |
| 243547_at    | <b>FLJ39639</b> | 283876 hypothetical protein FLJ39639                | -3.70  | 0.07 |
| 229054_at    | <b>FLJ39779</b> | 400223 FLJ39779 protein                             | -4.39  | 0.25 |
| 229559_at    | <b>FLJ40125</b> | 147699 hypothetical protein FLJ40125                | 3.58   | 0.08 |
| 214752_x_at  | <b>FLNA</b>     | 2316 filamin A, alpha (actin binding protein 280)   | 3.09   | 0.34 |
| 211299_s_at  | <b>FLOT2</b>    | 2319 flotillin 2                                    | -2.68  | 0.00 |
|              |                 | feline leukemia virus subgroup C cellular receptor  |        |      |
| 219316_s_at  | <b>FLVCR2</b>   | 55640 family, member 2                              | 2.41   | 0.13 |
| 1569257_at   | <b>FMNL1</b>    | 752 formin-like 1                                   | -2.34  | 0.07 |
| 242665_at    | <b>FMNL2</b>    | 114793 formin-like 2                                | 4.37   | 0.08 |
| 232249_at    | <b>FMNL3</b>    | 91010 formin-like 3                                 | 52.19  | 0.00 |
| 216442_x_at  | <b>FN1</b>      | 2335 fibronectin 1                                  | 5.71   | 0.00 |
| 212232_at    | <b>FNBP4</b>    | 23360 formin binding protein 4                      | 2.68   | 0.25 |
| 202304_at    | <b>FNDC3A</b>   | 22862 fibronectin type III domain containing 3A     | 3.87   | 0.08 |
| 218618_s_at  | <b>FNDC3B</b>   | 64778 fibronectin type III domain containing 3B     | 3.16   | 0.00 |
| 206371_at    | <b>FOLR3</b>    | 2352 folate receptor 3 (gamma)                      | -34.03 | 0.00 |
|              |                 | v-fos FBJ murine osteosarcoma viral oncogene        |        |      |
| 209189_at    | <b>FOS</b>      | 2353 homolog                                        | -6.37  | 0.07 |
| 204420_at    | <b>FOSL1</b>    | 8061 FOS-like antigen 1                             | 3.63   | 0.34 |
| 225262_at    | <b>FOSL2</b>    | 2355 FOS-like antigen 2                             | -3.76  | 0.03 |
| 202724_s_at  | <b>FOXO1</b>    | 2308 forkhead box O1                                | -23.26 | 0.00 |
| 204132_s_at  | <b>FOXO3</b>    | 2309 forkhead box O3                                | -5.71  | 0.03 |
| 205451_at    | <b>FOXO4</b>    | 4303 forkhead box O4                                | -3.94  | 0.03 |
| 224838_at    | <b>FOXP1</b>    | 27086 forkhead box P1                               | -3.15  | 0.25 |
| 205118_at    | <b>FPR1</b>     | 2357 formyl peptide receptor 1                      | -7.78  | 0.08 |
| 214560_at    | <b>FPRL2</b>    | 2359 formyl peptide receptor-like 2                 | 25.87  | 0.00 |
|              |                 | frequently rearranged in advanced T-cell            |        |      |
| 219889_at    | <b>FRAT1</b>    | 10023 lymphomas                                     | -24.12 | 0.00 |
|              |                 | frequently rearranged in advanced T-cell            |        |      |
| 209864_at    | <b>FRAT2</b>    | 23401 lymphomas 2                                   | -11.79 | 0.00 |
| 228233_at    | <b>FREM1</b>    | 158326 FRAS1 related extracellular matrix 1         | 2.95   | 0.00 |
| 230645_at    | <b>FRMD3</b>    | 257019 FERM domain containing 3                     | 9.06   | 0.08 |
| 1570207_at   | <b>FRRS1</b>    | 391059 ferric-chelate reductase 1                   | 2.55   | 0.51 |
| 204072_s_at  | <b>FRY</b>      | 10129 furry homolog (Drosophila)                    | -44.95 | 0.00 |
|              |                 | fascin homolog 1, actin-bundling protein            |        |      |
| 210933_s_at  | <b>FSCN1</b>    | 6624 (Strongylocentrotus purpuratus)                | 13.16  | 0.00 |
| 204948_s_at  | <b>FST</b>      | 10468 follistatin                                   | 2.61   | 0.00 |
| 208782_at    | <b>FSTL1</b>    | 11167 follistatin-like 1                            | 2.38   | 0.08 |
| 223120_at    | <b>FUCA2</b>    | 2519 fucosidase, alpha-L- 2, plasma                 | 6.18   | 0.06 |
| 223042_s_at  | <b>FUNDC2</b>   | 65991 FUN14 domain containing 2                     | 6.78   | 0.00 |

|             |                    |                                                                                                                                                                                                                                                                                                                                                                                  |        |      |
|-------------|--------------------|----------------------------------------------------------------------------------------------------------------------------------------------------------------------------------------------------------------------------------------------------------------------------------------------------------------------------------------------------------------------------------|--------|------|
| 201945_at   | <b>FURIN</b>       | 5045 furin (paired basic amino acid cleaving enzyme)                                                                                                                                                                                                                                                                                                                             | -2.18  | 0.34 |
|             |                    | FUS interacting protein (serine/arginine-rich) 1 /// similar to FUS interacting protein (serine-arginine rich) 1 /// similar to FUS-interacting serine-arginine rich protein 1 (TLS-associated protein with Ser-Arg repeats) (TLS-associated protein with SR repeats) (TASR) (TLS-associated serine-arginine protein) (TLS-associated SR protein) (Neural-specific SR protein... |        |      |
|             | <b>FUSIP1</b> ///  |                                                                                                                                                                                                                                                                                                                                                                                  |        |      |
|             | <b>LOC642558</b>   | 10772 ///                                                                                                                                                                                                                                                                                                                                                                        |        |      |
|             |                    | 642558 ///                                                                                                                                                                                                                                                                                                                                                                       |        |      |
| 213594_x_at | <b>LOC727922</b>   | 727922                                                                                                                                                                                                                                                                                                                                                                           | 2.77   | 0.08 |
|             |                    | FUS interacting protein (serine/arginine-rich) 1 /// similar to FUS-interacting serine-arginine-rich protein 1 (TLS-associated protein with Ser-Arg repeats) (TLS-associated protein with SR repeats) (TASR) (TLS-associated serine-arginine protein) (TLS-associated SR protein) (Neural-specific SR protein...                                                                 |        |      |
|             | <b>FUSIP1</b> ///  | 10772 ///                                                                                                                                                                                                                                                                                                                                                                        |        |      |
| 204299_at   | <b>LOC727922</b>   | 727922                                                                                                                                                                                                                                                                                                                                                                           | 2.13   | 0.13 |
|             |                    | fucosyltransferase 4 (alpha (1,3)                                                                                                                                                                                                                                                                                                                                                |        |      |
| 209893_s_at | <b>FUT4</b>        | 2526 fucosyltransferase, myeloid-specific)                                                                                                                                                                                                                                                                                                                                       | 2.61   | 0.34 |
|             |                    | fucosyltransferase 7 (alpha (1,3)                                                                                                                                                                                                                                                                                                                                                |        |      |
| 217696_at   | <b>FUT7</b>        | 2529 fucosyltransferase)                                                                                                                                                                                                                                                                                                                                                         | -18.97 | 0.00 |
|             |                    | fucosyltransferase 9 (alpha (1,3)                                                                                                                                                                                                                                                                                                                                                |        |      |
| 214046_at   | <b>FUT9</b>        | 10690 fucosyltransferase)                                                                                                                                                                                                                                                                                                                                                        | -2.40  | 0.25 |
| 202419_at   | <b>FVT1</b>        | 2531 follicular lymphoma variant translocation 1                                                                                                                                                                                                                                                                                                                                 | 5.90   | 0.00 |
| 217981_s_at | <b>FXC1</b>        | 26515 fracture callus 1 homolog (rat)                                                                                                                                                                                                                                                                                                                                            | 4.45   | 0.25 |
| 217655_at   | <b>FXYD5</b>       | 53827 FXYD domain containing ion transport regulator 5                                                                                                                                                                                                                                                                                                                           | 2.81   | 0.13 |
| 224642_at   | <b>FYTTD1</b>      | 84248 forty-two-three domain containing 1                                                                                                                                                                                                                                                                                                                                        | 5.90   | 0.00 |
| 213524_s_at | <b>G0S2</b>        | 50486 G0/G1switch 2                                                                                                                                                                                                                                                                                                                                                              | 5.86   | 0.00 |
|             |                    | GTPase activating protein (SH3 domain) binding                                                                                                                                                                                                                                                                                                                                   |        |      |
| 201503_at   | <b>G3BP1</b>       | 10146 protein 1                                                                                                                                                                                                                                                                                                                                                                  | 2.34   | 0.06 |
| 202275_at   | <b>G6PD</b>        | 2539 glucose-6-phosphate dehydrogenase                                                                                                                                                                                                                                                                                                                                           | -2.04  | 0.16 |
| 225998_at   | <b>GAB1</b>        | 2549 GRB2-associated binding protein 1                                                                                                                                                                                                                                                                                                                                           | -13.13 | 0.13 |
|             |                    | GA binding protein transcription factor, beta                                                                                                                                                                                                                                                                                                                                    |        |      |
| 204618_s_at | <b>GABPB2</b>      | 2553 subunit 2                                                                                                                                                                                                                                                                                                                                                                   | 4.17   | 0.00 |
| 203725_at   | <b>GADD45A</b>     | 1647 growth arrest and DNA-damage-inducible, alpha                                                                                                                                                                                                                                                                                                                               | -3.51  | 0.79 |
| 213560_at   | <b>GADD45B</b>     | 4616 Growth arrest and DNA-damage-inducible, beta                                                                                                                                                                                                                                                                                                                                | 2.94   | 0.00 |
|             | <b>GAL3ST4</b> /// | 221914 ///                                                                                                                                                                                                                                                                                                                                                                       |        |      |
| 239422_at   | <b>GPC2</b>        | 79690 galactose-3-O-sulfotransferase 4 /// glypican 2                                                                                                                                                                                                                                                                                                                            | -2.77  | 0.08 |
| 211810_s_at | <b>GALC</b>        | 2581 galactosylceramidase                                                                                                                                                                                                                                                                                                                                                        | 3.20   | 0.51 |
| 222235_s_at | <b>GALNACT-2</b>   | 55454 chondroitin sulfate GalNAcT-2                                                                                                                                                                                                                                                                                                                                              | 2.02   | 0.08 |
| 213280_at   | <b>GARNL4</b>      | 23108 GTPase activating Rap/RanGAP domain-like 4                                                                                                                                                                                                                                                                                                                                 | -7.63  | 0.00 |
| 208693_s_at | <b>GARS</b>        | 2617 glycyl-tRNA synthetase                                                                                                                                                                                                                                                                                                                                                      | 3.55   | 0.00 |
| 238756_at   | <b>GAS2L3</b>      | 283431 Growth arrest-specific 2 like 3                                                                                                                                                                                                                                                                                                                                           | 19.26  | 0.51 |
| 211067_s_at | <b>GAS7</b>        | 8522 growth arrest-specific 7                                                                                                                                                                                                                                                                                                                                                    | 2.19   | 0.34 |
| 238076_at   | <b>GATAD2B</b>     | 57459 GATA zinc finger domain containing 2B                                                                                                                                                                                                                                                                                                                                      | -5.34  | 0.16 |
|             |                    | glucan (1,4-alpha-), branching enzyme 1 (glycogen branching enzyme, Andersen disease, guanylate binding protein 1, interferon-inducible,                                                                                                                                                                                                                                         |        |      |
| 203282_at   | <b>GBE1</b>        | 2632 glycogen storage disease type IV)                                                                                                                                                                                                                                                                                                                                           | 3.13   | 0.00 |
| 231577_s_at | <b>GBP1</b>        | 2633 67kDa                                                                                                                                                                                                                                                                                                                                                                       | 4.46   | 0.00 |
| 223434_at   | <b>GBP3</b>        | 2635 guanylate binding protein 3                                                                                                                                                                                                                                                                                                                                                 | 32.60  | 0.00 |
| 235574_at   | <b>GBP4</b>        | 115361 guanylate binding protein 4                                                                                                                                                                                                                                                                                                                                               | 15.66  | 0.00 |
| 238581_at   | <b>GBP5</b>        | 115362 guanylate binding protein 5                                                                                                                                                                                                                                                                                                                                               | 7.58   | 0.00 |
| 204224_s_at | <b>GCH1</b>        | 2643 GTP cyclohydrolase 1 (dopa-responsive dystonia)                                                                                                                                                                                                                                                                                                                             | 8.01   | 0.00 |
| 202922_at   | <b>GCLC</b>        | 2729 glutamate-cysteine ligase, catalytic subunit                                                                                                                                                                                                                                                                                                                                | 2.11   | 0.34 |

|             |                |                                                                                                       |        |      |
|-------------|----------------|-------------------------------------------------------------------------------------------------------|--------|------|
| 203925_at   | <b>GCLM</b>    | 2730 glutamate-cysteine ligase, modifier subunit                                                      | 11.49  | 0.00 |
| 229868_s_at | <b>GDF15</b>   | 9518 Growth differentiation factor 15                                                                 | 8.58   | 0.51 |
| 219722_s_at | <b>GDPD3</b>   | 79153 domain containing 3                                                                             | -9.17  | 0.00 |
| 225161_at   | <b>GFM1</b>    | 85476 G elongation factor, mitochondrial 1                                                            | 5.93   | 0.13 |
| 202722_s_at | <b>GFPT1</b>   | 2673 glutamine-fructose-6-phosphate transaminase 1<br>golgi associated, gamma adaptin ear containing, | 6.14   | 0.13 |
| 218114_at   | <b>GGA1</b>    | 26088 ARF binding protein 1                                                                           | 6.80   | 0.08 |
| 202322_s_at | <b>GGPS1</b>   | 9453 geranylgeranyl diphosphate synthase 1                                                            | 2.70   | 0.08 |
| 211508_s_at | <b>GH2</b>     | 2689 growth hormone 2                                                                                 | 3.81   | 0.00 |
| 1552318_at  | <b>GIMAP1</b>  | 170575 GTPase, IMAP family member 1                                                                   | 2.06   | 0.25 |
| 232024_at   | <b>GIMAP2</b>  | 26157 GTPase, IMAP family member 2                                                                    | 3.69   | 0.13 |
| 218805_at   | <b>GIMAP5</b>  | 55340 GTPase, IMAP family member 5                                                                    | 17.43  | 0.00 |
| 219777_at   | <b>GIMAP6</b>  | 474344 GTPase, IMAP family member 6                                                                   | 3.29   | 0.51 |
| 204982_at   | <b>GIT2</b>    | 9815 G protein-coupled receptor kinase interactor 2                                                   | -2.25  | 0.08 |
| 215966_x_at | <b>GK3P</b>    | 2713 glycerol kinase 3 pseudogene                                                                     | 2.10   | 0.00 |
| 214430_at   | <b>GLA</b>     | 2717 galactosidase, alpha                                                                             | 3.77   | 0.06 |
| 201576_s_at | <b>GLB1</b>    | 2720 galactosidase, beta 1                                                                            | -2.19  | 0.51 |
| 227525_at   | <b>GLCCI1</b>  | 113263 glucocorticoid induced transcript 1                                                            | -12.40 | 0.13 |
| 214085_x_at | <b>GLIPR1</b>  | 11010 GLI pathogenesis-related 1 (glioma)                                                             | -5.22  | 0.00 |
| 223079_s_at | <b>GLS</b>     | 2744 glutaminase                                                                                      | 5.82   | 0.00 |
| 229770_at   | <b>GLT1D1</b>  | 144423 glycosyltransferase 1 domain containing 1                                                      | -6.00  | 0.00 |
| 218458_at   | <b>GMCL1</b>   | 64395 germ cell-less homolog 1 (Drosophila)                                                           | -6.83  | 0.08 |
| 202543_s_at | <b>GMFB</b>    | 2764 glia maturation factor, beta                                                                     | 2.31   | 0.02 |
| 204220_at   | <b>GMFG</b>    | 9535 glia maturation factor, gamma                                                                    | -2.13  | 0.00 |
| 218913_s_at | <b>GMIP</b>    | 51291 GEM interacting protein                                                                         | -2.95  | 0.07 |
| 222710_at   | <b>GMPPB</b>   | 29925 GDP-mannose pyrophosphorylase B<br>guanine nucleotide binding protein (G protein),              | 3.46   | 0.25 |
| 205349_at   | <b>GNA15</b>   | 2769 alpha 15 (Gq class)<br>guanine nucleotide binding protein (G protein),                           | 6.17   | 0.08 |
| 201040_at   | <b>GNAI2</b>   | 2771 alpha inhibiting activity polypeptide 2<br>Guanine nucleotide binding protein (G protein), q     | -2.37  | 0.07 |
| 224863_at   | <b>GNAQ</b>    | 2776 polypeptide                                                                                      | -4.13  | 0.00 |
| 200981_x_at | <b>GNAS</b>    | 2778 GNAS complex locus<br>guanine nucleotide binding protein (G protein),                            | -2.03  | 0.00 |
| 223564_s_at | <b>GNB1L</b>   | 54584 beta polypeptide 1-like<br>guanine nucleotide binding protein (G protein),                      | -2.07  | 0.34 |
| 206896_s_at | <b>GNG7</b>    | 2788 gamma 7<br>guanine nucleotide binding protein-like 2                                             | -4.53  | 0.34 |
| 201948_at   | <b>GNL2</b>    | 29889 (nucleolar)<br>guanine nucleotide binding protein-like 3                                        | 8.24   | 0.13 |
| 217850_at   | <b>GNL3</b>    | 26354 (nucleolar)                                                                                     | 9.21   | 0.00 |
| 205495_s_at | <b>GNLY</b>    | 10578 granulysin                                                                                      | 3.57   | 0.34 |
| 202382_s_at | <b>GNPDA1</b>  | 10007 glucosamine-6-phosphate deaminase 1<br>N-acetylglucosamine-1-phosphate transferase,             | 14.94  | 0.00 |
| 212959_s_at | <b>GNPTAB</b>  | 79158 alpha and beta subunits<br>N-acetylglucosamine-1-phosphate transferase,                         | 2.38   | 0.79 |
| 224887_at   | <b>GNPTG</b>   | 84572 gamma subunit<br>gonadotropin-releasing hormone 1 (luteinizing-                                 | 3.00   | 0.06 |
| 235540_at   | <b>GNRH1</b>   | 2796 releasing hormone)<br>glucosamine (N-acetyl)-6-sulfatase (Sanfilippo                             | -6.40  | 0.34 |
| 212335_at   | <b>GNS</b>     | 2799 disease IIID)                                                                                    | 2.13   | 0.00 |
| 214997_at   | <b>GOLGA1</b>  | 2800 Golgi autoantigen, golgin subfamily a, 1                                                         | 2.17   | 0.00 |
| 218193_s_at | <b>GOLT1B</b>  | 51026 golgi transport 1 homolog B (S. cerevisiae)                                                     | 5.99   | 0.06 |
| 207812_s_at | <b>GORASP2</b> | 26003 golgi reassembly stacking protein 2, 55kDa                                                      | 2.47   | 0.34 |
| 224632_at   | <b>GPATCH4</b> | 54865 G patch domain containing 4                                                                     | 4.44   | 0.51 |
| 201141_at   | <b>GNPMB</b>   | 10457 glycoprotein (transmembrane) nmb                                                                | 29.68  | 0.06 |

|              |                                   |                                                                                                        |        |      |
|--------------|-----------------------------------|--------------------------------------------------------------------------------------------------------|--------|------|
| 239533_at    | <b>GPR155</b>                     | 151556 G protein-coupled receptor 155                                                                  | -7.57  | 0.03 |
| 228950_s_at  | <b>GPR177</b>                     | 79971 G protein-coupled receptor 177                                                                   | -16.54 | 0.00 |
| 212070_at    | <b>GPR56</b>                      | 9289 G protein-coupled receptor 56                                                                     | 2.55   | 0.51 |
| 214467_at    | <b>GPR65</b>                      | 8477 G protein-coupled receptor 65                                                                     | 2.17   | 0.00 |
| 223767_at    | <b>GPR84</b>                      | 53831 G protein-coupled receptor 84                                                                    | 99.80  | 0.00 |
| 1553723_at   | <b>GPR97</b>                      | 222487 G protein-coupled receptor 97<br>glutathione peroxidase 4 (phospholipid                         | -2.61  | 0.07 |
| 201106_at    | <b>GPX4</b>                       | 2879 hydroperoxidase)                                                                                  | 4.47   | 0.08 |
| 219313_at    | <b>GRAMD1C</b>                    | 54762 GRAM domain containing 1C                                                                        | -9.18  | 0.03 |
| 212090_at    | <b>GRINA</b>                      | 2907 glutamate receptor, ionotropic, N-methyl D-<br>aspartate-associated protein 1 (glutamate binding) | 4.79   | 0.06 |
| 210981_s_at  | <b>GRK6</b>                       | 2870 G protein-coupled receptor kinase 6                                                               | -3.92  | 0.08 |
| 201912_s_at  | <b>GSPT1</b>                      | 2935 G1 to S phase transition 1                                                                        | 4.08   | 0.13 |
| 225609_at    | <b>GSR</b>                        | 2936 glutathione reductase                                                                             | 2.07   | 0.00 |
| 204149_s_at  | <b>GSTM4</b>                      | 2948 glutathione S-transferase M4                                                                      | -4.59  | 0.13 |
| 1557915_s_at | <b>GSTO1</b>                      | 9446 glutathione S-transferase omega 1<br>general transcription factor IIF, polypeptide 2,             | 5.28   | 0.00 |
| 209595_at    | <b>GTF2F2</b>                     | 2963 30kDa<br>general transcription factor IIH, polypeptide 1,                                         | 2.46   | 0.79 |
| 202453_s_at  | <b>GTF2H1</b><br><b>GTF2I</b> /// | 2965 62kDa                                                                                             | 4.81   | 0.06 |
|              | <b>GTF2IP1</b> ///                | 10009363 general transcription factor II, i ///                                                        |        |      |
|              | <b>LOC1000936</b> 1 ///           | 2969 transcription factor II, i, pseudogene 1 ///                                                      |        |      |
|              | <b>31</b> ///                     | 2970 ///                                                                                               |        |      |
| 210891_s_at  | <b>LOC732437</b>                  | 732437 general transcription factor II, i, pseudogene                                                  | -3.93  | 0.00 |
| 201338_x_at  | <b>GTF3A</b>                      | 2971 general transcription factor IIIA<br>general transcription factor IIIC, polypeptide 6,            | 2.37   | 0.08 |
| 225083_at    | <b>GTF3C6</b>                     | 112495 alpha 35kDa                                                                                     | 6.60   | 0.02 |
| 218238_at    | <b>GTPBP4</b>                     | 23560 GTP binding protein 4                                                                            | 14.04  | 0.00 |
| 242685_at    | <b>GTPBP8</b>                     | 29083 GTP-binding protein 8 (putative)                                                                 | 4.28   | 0.25 |
| 243909_x_at  | <b>GUSBL2</b>                     | 375513 glucuronidase, beta-like 2                                                                      | 2.32   | 0.34 |
| 213089_at    | <b>GUSBP1</b>                     | 153561 glucuronidase, beta pseudogene 1                                                                | -4.10  | 0.00 |
| 202947_s_at  | <b>GYPC</b>                       | 2995 glycophorin C (Gerbich blood group)<br>granzyme B (granzyme 2, cytotoxic T-lymphocyte-            | 3.33   | 0.16 |
| 210164_at    | <b>GZMB</b>                       | 3002 associated serine esterase 1)                                                                     | 8.85   | 0.51 |
| 208886_at    | <b>H1F0</b>                       | 3005 H1 histone family, member 0                                                                       | 2.72   | 0.34 |
| 212524_x_at  | <b>H2AFX</b>                      | 3014 H2A histone family, member X                                                                      | -2.38  | 0.13 |
| 200853_at    | <b>H2AFZ</b>                      | 3015 H2A histone family, member Z                                                                      | -3.03  | 0.00 |
| 208579_x_at  | <b>H2BFS</b>                      | 54145 H2B histone family, member S                                                                     | -4.07  | 0.03 |
| 206643_at    | <b>HAL</b>                        | 3034 histidine ammonia-lyase                                                                           | -20.77 | 0.00 |
| 227262_at    | <b>HAPLN3</b>                     | 145864 hyaluronan and proteoglycan link protein 3                                                      | 2.63   | 0.06 |
| 235458_at    | <b>HAVCR2</b>                     | 84868 hepatitis A virus cellular receptor 2                                                            | 7.28   | 0.00 |
| 201145_at    | <b>HAX1</b>                       | 10456 HCLS1 associated protein X-1                                                                     | 2.79   | 0.06 |
| 214414_x_at  | <b>HBA2</b>                       | 3040 hemoglobin, alpha 2                                                                               | -4.38  | 0.51 |
| 38037_at     | <b>HBEGF</b>                      | 1839 heparin-binding EGF-like growth factor                                                            | 19.26  | 0.00 |
| 227089_at    | <b>HBP1</b>                       | 26959 HMG-box transcription factor 1<br>holocytochrome c synthase (cytochrome c heme-                  | -2.55  | 0.00 |
| 203746_s_at  | <b>HCCS</b>                       | 3052 lyase)                                                                                            | 4.06   | 0.16 |
| 202474_s_at  | <b>HCFC1</b>                      | 3054 host cell factor C1 (VP16-accessory protein)                                                      | 12.31  | 0.06 |
| 1559050_at   | <b>HCG27</b>                      | 253018 HLA complex group 27                                                                            | -27.53 | 0.08 |
| 206685_at    | <b>HCG4</b>                       | 54435 HLA complex group 4                                                                              | 2.68   | 0.06 |
| 215974_at    | <b>HCG4P6</b>                     | 80868 HLA complex group 4 pseudogene 6                                                                 | 7.70   | 0.00 |
| 216174_at    | <b>HCRP1</b>                      | 387535 hepatocellular carcinoma-related HCRP1                                                          | -4.07  | 0.16 |
| 223640_at    | <b>HCST</b>                       | 10870 hematopoietic cell signal transducer                                                             | 4.53   | 0.06 |
| 217937_s_at  | <b>HDAC7A</b>                     | 51564 histone deacetylase 7A<br>hepatoma-derived growth factor (high-mobility                          | -3.79  | 0.00 |
| 200896_x_at  | <b>HDGF</b>                       | 3068 group protein 1-like)                                                                             | 4.31   | 0.00 |

|             |                                      |                                                                                                                                                 |       |      |
|-------------|--------------------------------------|-------------------------------------------------------------------------------------------------------------------------------------------------|-------|------|
| 209525_at   | <b>HDGFRP3</b>                       | 50810 Hepatoma-derived growth factor, related protein 3                                                                                         | -5.68 | 0.25 |
| 224129_s_at | <b>HDPY-30</b>                       | 84661 dpy-30-like protein                                                                                                                       | -2.71 | 0.34 |
| 218450_at   | <b>HEBP1</b>                         | 50865 heme binding protein 1                                                                                                                    | 4.21  | 0.06 |
| 203430_at   | <b>HEBP2</b>                         | 23593 heme binding protein 2                                                                                                                    | -6.61 | 0.00 |
| 213069_at   | <b>HEG1</b>                          | 57493 HEG homolog 1 (zebrafish)                                                                                                                 | 7.52  | 0.06 |
| 1552787_at  | <b>HELB</b>                          | 92797 helicase (DNA) B                                                                                                                          | 3.79  | 0.06 |
| 240486_at   | <b>HELZ</b>                          | 9931 Helicase with zinc finger<br>hect (homologous to the E6-AP (UBE3A) carboxyl<br>terminus) domain and RCC1 (CHC1)-like domain                | -3.59 | 0.08 |
| 218306_s_at | <b>HERC1</b>                         | 8925 (RLD) 1                                                                                                                                    | -2.84 | 0.51 |
| 203393_at   | <b>HES1</b>                          | 3280 hairy and enhancer of split 1, (Drosophila)                                                                                                | 2.86  | 0.34 |
| 201765_s_at | <b>HEXA</b>                          | 3073 hexosaminidase A (alpha polypeptide)                                                                                                       | 2.32  | 0.00 |
| 218839_at   | <b>HEY1</b>                          | 23462 hairy/enhancer-of-split related with YRPW motif 1                                                                                         | -7.27 | 0.00 |
| 204689_at   | <b>HHEX</b>                          | 3087 hematopoietically expressed homeobox                                                                                                       | -9.35 | 0.07 |
| 225222_at   | <b>HIAT1</b>                         | 64645 hippocampus abundant transcript 1<br>hypoxia-inducible factor 1, alpha subunit (basic<br>hypoxia-inducible factor 1, alpha subunit (basic | 3.13  | 0.00 |
| 200989_at   | <b>HIF1A</b>                         | 3091 helix-loop-helix transcription factor)                                                                                                     | 2.38  | 0.00 |
| 209328_x_at | <b>HIGD2A</b>                        | 192286 HIG1 domain family, member 2A                                                                                                            | 2.72  | 0.79 |
| 207721_x_at | <b>HINT1</b>                         | 3094 histidine triad nucleotide binding protein 1                                                                                               | 6.41  | 0.00 |
| 228697_at   | <b>HINT3</b>                         | 135114 histidine triad nucleotide binding protein 3                                                                                             | 2.30  | 0.02 |
| 226297_at   | <b>HIPK3</b>                         | 10114 Homeodomain interacting protein kinase 3                                                                                                  | -2.24 | 0.00 |
| 209398_at   | <b>HIST1H1C</b>                      | 3006 histone cluster 1, H1c                                                                                                                     | -4.49 | 0.51 |
| 208569_at   | <b>HIST1H2AB</b>                     | 8335 histone cluster 1, H2ab                                                                                                                    | -2.39 | 0.34 |
| 215071_s_at | <b>HIST1H2AC</b>                     | 8334 histone cluster 1, H2ac                                                                                                                    | -9.43 | 0.00 |
| 207156_at   | <b>HIST1H2AG</b>                     | 8969 histone cluster 1, H2ag                                                                                                                    | -4.18 | 0.51 |
| 214542_x_at | <b>HIST1H2AI</b>                     | 8329 histone cluster 1, H2ai                                                                                                                    | -3.21 | 0.03 |
| 208583_x_at | <b>HIST1H2AJ</b>                     | 8331 histone cluster 1, H2aj                                                                                                                    | -3.16 | 0.03 |
| 236193_at   | <b>HIST1H2BC</b><br><b>HIST1H2BC</b> | 8347 histone cluster 1, H2bc                                                                                                                    | -7.93 | 0.03 |
|             | <b>///</b>                           | 8339 <b>///</b>                                                                                                                                 |       |      |
| 214455_at   | <b>HIST1H2BG</b>                     | 8347 histone cluster 1, H2bg <b>///</b> histone cluster 1, H2bc                                                                                 | -5.34 | 0.07 |
| 209911_x_at | <b>HIST1H2BD</b>                     | 3017 histone cluster 1, H2bd                                                                                                                    | -4.68 | 0.00 |
| 208527_x_at | <b>HIST1H2BE</b>                     | 8344 histone cluster 1, H2be                                                                                                                    | -4.76 | 0.03 |
| 208490_x_at | <b>HIST1H2BF</b>                     | 8343 histone cluster 1, H2bf                                                                                                                    | -4.57 | 0.00 |
| 208546_x_at | <b>HIST1H2BH</b>                     | 8345 histone cluster 1, H2bh                                                                                                                    | -3.98 | 0.08 |
| 208523_x_at | <b>HIST1H2BI</b>                     | 8346 histone cluster 1, H2bi                                                                                                                    | -4.07 | 0.07 |
| 214540_at   | <b>HIST1H2BO</b>                     | 8348 histone cluster 1, H2bo                                                                                                                    | -3.55 | 0.00 |
| 214522_x_at | <b>HIST1H3D</b>                      | 8351 histone cluster 1, H3d                                                                                                                     | -2.73 | 0.00 |
| 206110_at   | <b>HIST1H3H</b>                      | 8357 histone cluster 1, H3h                                                                                                                     | -4.94 | 0.25 |
|             | <b>HIST2H2AA3</b>                    |                                                                                                                                                 |       |      |
|             | <b>///</b>                           | 723790 <b>///</b> histone cluster 2, H2aa3 <b>///</b> histone cluster 2,<br>H2aa4                                                               |       |      |
| 214290_s_at | <b>HIST2H2AA4</b>                    | 8337 H2aa4                                                                                                                                      | -2.30 | 0.34 |
| 202708_s_at | <b>HIST2H2BE</b>                     | 8349 histone cluster 2, H2be                                                                                                                    | -2.38 | 0.07 |
| 231681_x_at | <b>HIST3H2A</b>                      | 92815 Histone cluster 3, H2a<br>human immunodeficiency virus type I enhancer                                                                    | -3.98 | 0.07 |
| 212641_at   | <b>HIVEP2</b>                        | 3097 binding protein 2                                                                                                                          | 3.82  | 0.00 |
| 205936_s_at | <b>HK3</b>                           | 3101 hexokinase 3 (white cell)<br>major histocompatibility complex, class II, DM                                                                | -4.92 | 0.51 |
| 217478_s_at | <b>HLA-DMA</b>                       | 3108 alpha<br>major histocompatibility complex, class II, DM                                                                                    | 4.83  | 0.02 |
| 203932_at   | <b>HLA-DMB</b>                       | 3109 beta                                                                                                                                       | 4.23  | 0.06 |
| 205671_s_at | <b>HLA-DOB</b>                       | 3112 major histocompatibility complex, class II, DO beta<br>major histocompatibility complex, class II, DP                                      | 4.49  | 0.16 |
| 213537_at   | <b>HLA-DPA1</b>                      | 3113 alpha 1                                                                                                                                    | 16.27 | 0.00 |



|              |                   |        |                                                                                                         |       |      |
|--------------|-------------------|--------|---------------------------------------------------------------------------------------------------------|-------|------|
| 201137_s_at  | <b>HLA-DPB1</b>   | 3115   | 1 major histocompatibility complex, class II, DP beta                                                   | 3.92  | 0.02 |
| 213831_at    | <b>HLA-DQA1</b>   | 3117   | alpha 1 major histocompatibility complex, class II, DQ                                                  | 8.41  | 0.00 |
|              | <b>HLA-DQA1</b>   |        | major histocompatibility complex, class II, DQ                                                          |       |      |
|              | <b>HLA-DQA1</b>   |        | alpha 1 /// major histocompatibility complex, class                                                     |       |      |
|              | <b>HLA-DQA2</b>   | 3117   | /// II, DQ alpha 2 /// similar to HLA class II                                                          |       |      |
| 212671_s_at  | <b>LOC731682</b>  | 731682 | 3118 /// histocompatibility antigen, DQ(1) alpha chain precursor (DC-4 alpha chain)                     | 14.39 | 0.00 |
| 212998_x_at  | <b>HLA-DQB1</b>   | 3119   | 1 major histocompatibility complex, class II, DQ beta                                                   | 19.63 | 0.00 |
|              | <b>HLA-DQB1</b>   |        | major histocompatibility complex, class II, DQ beta                                                     |       |      |
|              | <b>HLA-DQB1</b>   |        | 1 /// similar to HLA class II histocompatibility                                                        |       |      |
| 211654_x_at  | <b>LOC650557</b>  | 650557 | 3119 /// antigen, DQ(W1.1) beta chain precursor (DQB1*0501)                                             | 17.33 | 0.00 |
| 208894_at    | <b>HLA-DRA</b>    | 3122   | alpha major histocompatibility complex, class II, DR                                                    | 12.76 | 0.00 |
| 208306_x_at  | <b>HLA-DRB1</b>   | 3123   | 1 Major histocompatibility complex, class II, DR beta                                                   | 5.32  | 0.02 |
|              | <b>HLA-DRB1</b>   |        |                                                                                                         |       |      |
|              | <b>HLA-DRB3</b>   | 3123   | /// major histocompatibility complex, class II, DR beta                                                 |       |      |
| 215193_x_at  | <b>LOC730415</b>  | 730415 | 3125 /// 1 /// major histocompatibility complex, class II, DR beta 3 /// hypothetical protein LOC730415 | 12.25 | 0.00 |
|              | <b>HLA-DRB1</b>   |        |                                                                                                         |       |      |
| 209312_x_at  | <b>LOC730415</b>  | 730415 | 3123 /// major histocompatibility complex, class II, DR beta 1 /// hypothetical protein LOC730415       | 6.45  | 0.00 |
| 209728_at    | <b>HLA-DRB4</b>   | 3126   | 4 major histocompatibility complex, class II, DR beta                                                   | 8.39  | 0.13 |
| 217362_x_at  | <b>HLA-DRB6</b>   | 3128   | 6 (pseudogene) major histocompatibility complex, class II, DR beta                                      | 4.10  | 0.00 |
| 232209_x_at  | <b>HM13</b>       | 81502  | histocompatibility (minor) 13                                                                           | 2.24  | 0.16 |
| 212597_s_at  | <b>HMG2L1</b>     | 10042  | high-mobility group protein 2-like 1                                                                    | 4.94  | 0.16 |
| 206074_s_at  | <b>HMGA1</b>      | 3159   | high mobility group AT-hook 1                                                                           | 5.91  | 0.06 |
| 208808_s_at  | <b>HMGB2</b>      | 3148   | high-mobility group box 2                                                                               | -3.89 | 0.00 |
| 202772_at    | <b>HMGCL</b>      | 3155   | lyase (hydroxymethylglutaricaciduria) 3-hydroxymethyl-3-methylglutaryl-Coenzyme A                       | 3.05  | 0.34 |
|              |                   |        | 3-hydroxy-3-methylglutaryl-Coenzyme A synthase                                                          |       |      |
| 221750_at    | <b>HMGCS1</b>     | 3157   | 1 (soluble)                                                                                             | 5.31  | 0.16 |
| 203665_at    | <b>HMOX1</b>      | 3162   | heme oxygenase (decycling) 1                                                                            | 4.04  | 0.00 |
| 217755_at    | <b>HN1</b>        | 51155  | hematological and neurological expressed 1                                                              | -7.06 | 0.00 |
| 204111_at    | <b>HNMT</b>       | 3176   | histamine N-methyltransferase                                                                           | 2.16  | 0.00 |
| 208766_s_at  | <b>HNRNPR</b>     | 10236  | heterogeneous nuclear ribonucleoprotein R                                                               | 3.86  | 0.00 |
| 211932_at    | <b>HNRPA3</b>     | 220988 | heterogeneous nuclear ribonucleoprotein A3                                                              | 2.11  | 0.25 |
|              |                   |        | heterogeneous nuclear ribonucleoprotein A3                                                              |       |      |
| 206808_at    | <b>HNRPA3P1</b>   | 10151  | pseudogene 1                                                                                            | 2.13  | 0.16 |
| 201277_s_at  | <b>HNRPAB</b>     | 3182   | heterogeneous nuclear ribonucleoprotein A/B                                                             | 2.12  | 0.13 |
| 1554678_s_at | <b>HNRPDL</b>     | 9987   | heterogeneous nuclear ribonucleoprotein D-like                                                          | 2.04  | 0.00 |
| 201376_s_at  | <b>HNRPF</b>      | 3185   | heterogeneous nuclear ribonucleoprotein F                                                               | 4.88  | 0.00 |
| 228642_at    | <b>HOXA2</b>      | 3199   | Homeobox A2                                                                                             | -4.73 | 0.08 |
| 206697_s_at  | <b>HP</b>         | 3240   | haptoglobin                                                                                             | -3.57 | 0.00 |
|              |                   |        |                                                                                                         |       |      |
| 208470_s_at  | <b>HP /// HPR</b> | 3250   | haptoglobin /// haptoglobin-related protein                                                             | -5.35 | 0.13 |
| 229204_at    | <b>HP1BP3</b>     | 50809  | Heterochromatin protein 1, binding protein 3                                                            | -2.21 | 0.07 |
| 208471_at    | <b>HPR</b>        | 3250   | haptoglobin-related protein                                                                             | 3.01  | 0.06 |
| 204544_at    | <b>HPS5</b>       | 11234  | Hermansky-Pudlak syndrome 5                                                                             | 4.68  | 0.51 |
| 216879_at    | <b>HR44</b>       | 27251  | Hr44 antigen                                                                                            | 3.13  | 0.06 |
| 205579_at    | <b>HRH1</b>       | 3269   | histamine receptor H1                                                                                   | 3.25  | 0.00 |
| 220805_at    | <b>HRH2</b>       | 3274   | histamine receptor H2                                                                                   | -2.69 | 0.25 |

|             |                   |                                                       |        |      |
|-------------|-------------------|-------------------------------------------------------|--------|------|
|             |                   | heparan sulfate (glucosamine) 3-O-                    |        |      |
| 227361_at   | <b>HS3ST3B1</b>   | 9953 sulfotransferase 3B1                             | 15.42  | 0.00 |
| 217989_at   | <b>HSD17B11</b>   | 51170 hydroxysteroid (17-beta) dehydrogenase 11       | -4.12  | 0.00 |
| 201413_at   | <b>HSD17B4</b>    | 3295 hydroxysteroid (17-beta) dehydrogenase 4         | 2.34   | 0.25 |
|             |                   | hydroxy-delta-5-steroid dehydrogenase, 3 beta-        |        |      |
| 222817_at   | <b>HSD3B7</b>     | 80270 and steroid delta-isomerase 7                   | 14.13  | 0.79 |
| 209513_s_at | <b>HSDL2</b>      | 84263 hydroxysteroid dehydrogenase like 2             | -11.21 | 0.00 |
| 1552623_at  | <b>HSH2D</b>      | 84941 hematopoietic SH2 domain containing             | -12.35 | 0.00 |
|             |                   | heat shock protein 90kDa alpha (cytosolic), class     |        |      |
| 211969_at   | <b>HSP90AA1</b>   | 3320 A member 1                                       | 3.00   | 0.00 |
|             |                   | heat shock protein 90kDa alpha (cytosolic), class     |        |      |
| 1557910_at  | <b>HSP90AB1</b>   | 3326 B member 1                                       | 11.21  | 0.00 |
|             |                   |                                                       |        |      |
| 200599_s_at | <b>HSP90B1</b>    | 7184 heat shock protein 90kDa beta (Grp94), member 1  | 4.40   | 0.00 |
|             | <b>HSPA1A</b> /// | 3303 ///                                              |        |      |
|             | <b>HSPA1B</b>     | 3304 heat shock 70kDa protein 1A /// heat shock 70kDa |        |      |
| 200800_s_at | <b>HSPA1B</b>     | 3304 protein 1B                                       | -2.74  | 0.00 |
| 208815_x_at | <b>HSPA4</b>      | 3308 heat shock 70kDa protein 4                       | 2.88   | 0.00 |
|             |                   | heat shock 70kDa protein 5 (glucose-regulated         |        |      |
| 211936_at   | <b>HSPA5</b>      | 3309 protein, 78kDa)                                  | 2.22   | 0.00 |
| 213418_at   | <b>HSPA6</b>      | 3310 heat shock 70kDa protein 6 (HSP70B')             | -5.35  | 0.00 |
| 200692_s_at | <b>HSPA9</b>      | 3313 heat shock 70kDa protein 9 (mortalin)            | 15.30  | 0.00 |
| 203023_at   | <b>HSPC111</b>    | 51491 hypothetical protein HSPC111                    | 3.62   | 0.00 |
| 221597_s_at | <b>HSPC171</b>    | 29100 HSPC171 protein                                 | 6.18   | 0.00 |
| 205133_s_at | <b>HSPE1</b>      | 3336 heat shock 10kDa protein 1 (chaperonin 10)       | 7.41   | 0.00 |
| 206976_s_at | <b>HSPH1</b>      | 10808 heat shock 105kDa/110kDa protein 1              | 18.68  | 0.00 |
| 202602_s_at | <b>HTATSF1</b>    | 27336 HIV-1 Tat specific factor 1                     | 2.71   | 0.51 |
| 217618_x_at | <b>HUS1</b>       | 3364 HUS1 checkpoint homolog (S. pombe)               | 3.94   | 0.51 |
| 226879_at   | <b>HVCN1</b>      | 84329 hydrogen voltage-gated channel 1                | -4.09  | 0.79 |
| 233809_at   | <b>HYPK</b>       | 25764 Huntingtin interacting protein K                | 3.69   | 0.00 |
|             |                   | isoamyl acetate-hydrolyzing esterase 1 homolog        |        |      |
| 230621_at   | <b>IAH1</b>       | 285148 (S. cerevisiae)                                | 2.08   | 0.00 |
|             |                   | inhibitor of Bruton agammaglobulinemia tyrosine       |        |      |
| 210970_s_at | <b>IBTK</b>       | 25998 kinase                                          | 9.07   | 0.34 |
|             |                   | intercellular adhesion molecule 1 (CD54), human       |        |      |
| 202638_s_at | <b>ICAM1</b>      | 3383 rhinovirus receptor                              | 18.83  | 0.00 |
| 213620_s_at | <b>ICAM2</b>      | 3384 intercellular adhesion molecule 2                | 10.20  | 0.34 |
| 204949_at   | <b>ICAM3</b>      | 3385 intercellular adhesion molecule 3                | -3.86  | 0.00 |
|             |                   | inhibitor of DNA binding 4, dominant negative         |        |      |
| 209291_at   | <b>ID4</b>        | 3400 helix-loop-helix protein                         | 3.15   | 0.16 |
| 202070_s_at | <b>IDH3A</b>      | 3419 isocitrate dehydrogenase 3 (NAD+) alpha          | 3.37   | 0.25 |
| 201631_s_at | <b>IER3</b>       | 8870 immediate early response 3                       | 2.00   | 0.00 |
| 218611_at   | <b>IER5</b>       | 51278 immediate early response 5                      | 2.92   | 0.00 |
| 202411_at   | <b>IFI27</b>      | 3429 interferon, alpha-inducible protein 27           | 6.54   | 0.13 |
| 201422_at   | <b>IFI30</b>      | 10437 interferon, gamma-inducible protein 30          | 2.97   | 0.00 |
| 209417_s_at | <b>IFI35</b>      | 3430 interferon-induced protein 35                    | 5.86   | 0.00 |
| 214453_s_at | <b>IFI44</b>      | 10561 interferon-induced protein 44                   | 2.34   | 0.25 |
| 204439_at   | <b>IFI44L</b>     | 10964 interferon-induced protein 44-like              | 5.13   | 0.79 |
| 219209_at   | <b>IFIH1</b>      | 64135 interferon induced with helicase C domain 1     | 4.91   | 0.00 |
|             |                   | interferon-induced protein with tetratricopeptide     |        |      |
| 203153_at   | <b>IFIT1</b>      | 3434 repeats 1                                        | -5.71  | 0.03 |
|             |                   | interferon-induced protein with tetratricopeptide     |        |      |
| 229450_at   | <b>IFIT3</b>      | 3437 repeats 3                                        | 2.47   | 0.00 |
|             |                   | interferon-induced protein with tetratricopeptide     |        |      |
| 203595_s_at | <b>IFIT5</b>      | 24138 repeats 5                                       | 2.07   | 0.34 |
|             |                   | interferon induced transmembrane protein 2 (1-        |        |      |
| 201315_x_at | <b>IFITM2</b>     | 10581 8D)                                             | -2.14  | 0.00 |
| 225669_at   | <b>IFNAR1</b>     | 3454 interferon (alpha, beta and omega) receptor 1    | -2.28  | 0.16 |
|             |                   | intraflagellar transport 57 homolog                   |        |      |
| 218100_s_at | <b>IFT57</b>      | 55081 (Chlamydomonas)                                 | 3.18   | 0.08 |

|              |                  |                                                         |        |      |
|--------------|------------------|---------------------------------------------------------|--------|------|
| 243358_at    | <b>IGF1R</b>     | 3480 insulin-like growth factor 1 receptor              | -15.63 | 0.08 |
|              |                  | insulin-like growth factor 2 mRNA binding protein       |        |      |
| 203820_s_at  | <b>IGF2BP3</b>   | 10643 3                                                 | 5.43   | 0.51 |
|              |                  | immunoglobulin heavy constant alpha 1 ///               |        |      |
|              | <b>IGHA1 ///</b> | 28396 ///                                               |        |      |
|              | <b>IGHG1 ///</b> | 3493 ///                                                |        |      |
|              | <b>IGHG3 ///</b> | 3500 ///                                                |        |      |
|              | <b>IGHM ///</b>  | 3502 ///                                                |        |      |
| 216557_x_at  | <b>IGHV4-31</b>  | 3507 31                                                 | -2.01  | 0.51 |
| 235202_x_at  | <b>IKIP</b>      | 121457 IKK interacting protein                          | -11.97 | 0.00 |
| 227344_at    | <b>IKZF1</b>     | 10320 IKAROS family zinc finger 1 (Ikaros)              | -5.26  | 0.07 |
| 226759_at    | <b>IKZF4</b>     | 64375 IKAROS family zinc finger 4 (Eos)                 | 18.30  | 0.08 |
| 204912_at    | <b>IL10RA</b>    | 3587 interleukin 10 receptor, alpha                     | 5.76   | 0.00 |
| 239522_at    | <b>IL12RB1</b>   | 3594 Interleukin 12 receptor, beta 1                    | 2.17   | 0.25 |
| 201888_s_at  | <b>IL13RA1</b>   | 3597 interleukin 13 receptor, alpha 1                   | -2.84  | 0.00 |
| 207375_s_at  | <b>IL15RA</b>    | 3601 interleukin 15 receptor, alpha                     | 43.69  | 0.08 |
| 209827_s_at  | <b>IL16</b>      | 3603 interleukin 16 (lymphocyte chemoattractant factor) | -10.35 | 0.00 |
| 205707_at    | <b>IL17RA</b>    | 23765 interleukin 17 receptor A                         | -3.28  | 0.00 |
| 222868_s_at  | <b>IL18BP</b>    | 10068 interleukin 18 binding protein                    | 76.38  | 0.00 |
| 207072_at    | <b>IL18RAP</b>   | 8807 interleukin 18 receptor accessory protein          | -2.16  | 0.79 |
| 210118_s_at  | <b>IL1A</b>      | 3552 interleukin 1, alpha                               | 203.33 | 0.00 |
| 205067_at    | <b>IL1B</b>      | 3553 interleukin 1, beta                                | 3.38   | 0.00 |
| 205227_at    | <b>IL1RAP</b>    | 3556 interleukin 1 receptor accessory protein           | -2.80  | 0.00 |
| 212659_s_at  | <b>IL1RN</b>     | 3557 interleukin 1 receptor antagonist                  | 4.46   | 0.00 |
| 219971_at    | <b>IL21R</b>     | 50615 interleukin 21 receptor                           | -2.16  | 0.25 |
| 211269_s_at  | <b>IL2RA</b>     | 3559 interleukin 2 receptor, alpha                      | 29.96  | 0.00 |
| 203828_s_at  | <b>IL32</b>      | 9235 interleukin 32                                     | 12.84  | 0.08 |
| 206148_at    | <b>IL3RA</b>     | 3563 interleukin 3 receptor, alpha (low affinity)       | 2.81   | 0.06 |
| 230966_at    | <b>IL4I1</b>     | 259307 interleukin 4 induced 1                          | 96.27  | 0.00 |
| 210744_s_at  | <b>IL5RA</b>     | 3568 interleukin 5 receptor, alpha                      | -2.20  | 0.34 |
| 205207_at    | <b>IL6</b>       | 3569 interleukin 6 (interferon, beta 2)                 | 38.50  | 0.00 |
|              |                  | interleukin 6 signal transducer (gp130, oncostatin      |        |      |
| 204863_s_at  | <b>IL6ST</b>     | 3572 M receptor)                                        | 5.03   | 0.00 |
| 202859_x_at  | <b>IL8</b>       | 3576 interleukin 8                                      | 5.14   | 0.00 |
| 207094_at    | <b>IL8RA</b>     | 3577 interleukin 8 receptor, alpha                      | -40.25 | 0.00 |
| 207008_at    | <b>IL8RB</b>     | 3579 interleukin 8 receptor, beta                       | -6.59  | 0.00 |
| 200052_s_at  | <b>ILF2</b>      | 3608 interleukin enhancer binding factor 2, 45kDa       | 7.09   | 0.08 |
| 211375_s_at  | <b>ILF3</b>      | 3609 interleukin enhancer binding factor 3, 90kDa       | 5.29   | 0.00 |
|              |                  | integrin-linked kinase-associated serine/threonine      |        |      |
| 221548_s_at  | <b>ILKAP</b>     | 80895 phosphatase 2C                                    | 2.27   | 0.34 |
| 203126_at    | <b>IMPA2</b>     | 3613 inositol(myo)-1(or 4)-monophosphatase 2            | -37.62 | 0.00 |
| 224744_at    | <b>IMPAD1</b>    | 54928 inositol monophosphatase domain containing 1      | 2.98   | 0.51 |
| 210029_at    | <b>INDO</b>      | 3620 indoleamine-pyrrole 2,3 dioxygenase                | 50.71  | 0.00 |
| 1568638_a_at | <b>INDOL1</b>    | 169355 indoleamine-pyrrole 2,3 dioxygenase-like 1       | 39.61  | 0.34 |
| 213544_at    | <b>ING2</b>      | 3622 Inhibitor of growth family, member 2               | -3.13  | 0.79 |
| 204926_at    | <b>INHBA</b>     | 3624 inhibin, beta A                                    | 102.19 | 0.00 |
| 225357_s_at  | <b>INOC1</b>     | 54617 INO80 complex homolog 1 (S. cerevisiae)           | 2.73   | 0.51 |
| 1554757_a_at | <b>INPP5A</b>    | 3632 inositol polyphosphate-5-phosphatase, 40kDa        | -2.82  | 0.25 |
| 203332_s_at  | <b>INPP5D</b>    | 3635 inositol polyphosphate-5-phosphatase, 145kDa       | -2.77  | 0.16 |
| 229632_s_at  | <b>INTS10</b>    | 55174 integrator complex subunit 10                     | -2.93  | 0.13 |
| 218819_at    | <b>INTS6</b>     | 26512 integrator complex subunit 6                      | -3.75  | 0.07 |
| 218905_at    | <b>INTS8</b>     | 55656 integrator complex subunit 8                      | -2.32  | 0.16 |
| 239878_at    | <b>IPMK</b>      | 253430 inositol polyphosphate multikinase               | -3.10  | 0.16 |
| 238488_at    | <b>IPO11</b>     | 51194 importin 11                                       | 15.37  | 0.06 |
| 200993_at    | <b>IPO7</b>      | 10527 importin 7                                        | 3.56   | 0.08 |
| 210840_s_at  | <b>IQGAP1</b>    | 8826 IQ motif containing GTPase activating protein 1    | -2.36  | 0.00 |

|              |                 |                                                                                                                    |        |      |
|--------------|-----------------|--------------------------------------------------------------------------------------------------------------------|--------|------|
| 203474_at    | <b>IQGAP2</b>   | 10788 IQ motif containing GTPase activating protein 2                                                              | -6.42  | 0.00 |
| 203906_at    | <b>IQSEC1</b>   | 9922 IQ motif and Sec7 domain 1                                                                                    | -3.33  | 0.00 |
| 201587_s_at  | <b>IRAK1</b>    | 3654 interleukin-1 receptor-associated kinase 1                                                                    | 3.70   | 0.06 |
| 231779_at    | <b>IRAK2</b>    | 3656 interleukin-1 receptor-associated kinase 2                                                                    | 33.64  | 0.00 |
| 220034_at    | <b>IRAK3</b>    | 11213 interleukin-1 receptor-associated kinase 3                                                                   | 3.03   | 0.06 |
| 205469_s_at  | <b>IRF5</b>     | 3663 interferon regulatory factor 5                                                                                | 6.54   | 0.02 |
| 208436_s_at  | <b>IRF7</b>     | 3665 interferon regulatory factor 7                                                                                | 4.34   | 0.25 |
| 204057_at    | <b>IRF8</b>     | 3394 interferon regulatory factor 8                                                                                | 3.04   | 0.51 |
| 209185_s_at  | <b>IRS2</b>     | 8660 insulin receptor substrate 2<br>iron-sulfur cluster assembly 1 homolog (S.                                    | -2.49  | 0.03 |
| 209274_s_at  | <b>ISCA1</b>    | 81689 cerevisiae)                                                                                                  | -3.29  | 0.79 |
| 205483_s_at  | <b>ISG15</b>    | 9636 ISG15 ubiquitin-like modifier                                                                                 | 3.06   | 0.13 |
| 204698_at    | <b>ISG20</b>    | 3669 interferon stimulated exonuclease gene 20kDa<br>interferon stimulated exonuclease gene 20kDa-                 | 2.26   | 0.00 |
| 219361_s_at  | <b>ISG20L1</b>  | 64782 like 1                                                                                                       | 6.38   | 0.34 |
| 225632_s_at  | <b>ISY1 ///</b> | 339122 /// ISY1 splicing factor homolog (S. cerevisiae) ///                                                        |        |      |
| 201656_at    | <b>RAB43</b>    | 57461 RAB43, member RAS oncogene family                                                                            | -4.57  | 0.25 |
| 216331_at    | <b>ITGA6</b>    | 3655 integrin, alpha 6                                                                                             | -6.38  | 0.51 |
|              | <b>ITGA7</b>    | 3679 integrin, alpha 7<br>integrin, beta 1 (fibronectin receptor, beta<br>polypeptide, antigen CD29 includes MDF2, | -2.02  | 0.51 |
| 1553530_a_at | <b>ITGB1</b>    | 3688 MSK12)                                                                                                        | 2.36   | 0.16 |
| 210740_s_at  | <b>ITPK1</b>    | 3705 inositol 1,3,4-triphosphate 5/6 kinase                                                                        | -3.53  | 0.00 |
| 203723_at    | <b>ITPKB</b>    | 3707 inositol 1,4,5-triphosphate 3-kinase B                                                                        | -4.71  | 0.13 |
| 203710_at    | <b>ITPR1</b>    | 3708 inositol 1,4,5-triphosphate receptor, type 1                                                                  | 11.98  | 0.00 |
| 35776_at     | <b>ITSN1</b>    | 6453 intersectin 1 (SH3 domain protein)                                                                            | 2.98   | 0.00 |
| 240941_at    | <b>ITSN2</b>    | 50618 Intersectin 2                                                                                                | -2.03  | 0.34 |
| 244235_at    | <b>IVNS1ABP</b> | 10625 influenza virus NS1A binding protein                                                                         | 3.50   | 0.00 |
| 231183_s_at  | <b>JAG1</b>     | 182 Jagged 1 (Alagille syndrome)                                                                                   | 31.00  | 0.00 |
| 223104_at    | <b>JAGN1</b>    | 84522 jagunal homolog 1 (Drosophila)                                                                               | 2.00   | 0.79 |
| 205888_s_at  | <b>JAKMIP2</b>  | 9832 janus kinase and microtubule interacting protein 2                                                            | 8.99   | 0.25 |
| 226371_at    | <b>JARID1A</b>  | 5927 jumonji, AT rich interactive domain 1A                                                                        | -2.67  | 0.16 |
| 203298_s_at  | <b>JARID2</b>   | 3720 jumonji, AT rich interactive domain 2                                                                         | -3.22  | 0.00 |
| 225798_at    | <b>JAZF1</b>    | 221895 JAZF zinc finger 1                                                                                          | -2.94  | 0.07 |
| 226267_at    | <b>JDP2</b>     | 122953 jun dimerization protein 2<br>jumonji C domain-containing histone demethylase                               | -3.73  | 0.13 |
| 221778_at    | <b>JHDM1D</b>   | 80853 1 homolog D (S. cerevisiae)                                                                                  | -2.83  | 0.00 |
| 210878_s_at  | <b>JMJD1B</b>   | 51780 jumonji domain containing 1B                                                                                 | -2.41  | 0.08 |
| 221763_at    | <b>JMJD1C</b>   | 221037 jumonji domain containing 1C                                                                                | -2.82  | 0.07 |
| 212496_s_at  | <b>JMJD2B</b>   | 23030 jumonji domain containing 2B                                                                                 | -5.38  | 0.03 |
| 212723_at    | <b>JMJD6</b>    | 23210 jumonji domain containing 6                                                                                  | 3.05   | 0.79 |
| 229294_at    | <b>JPH3</b>     | 57338 junctophilin 3                                                                                               | 2.20   | 0.51 |
| 213281_at    | <b>JUN</b>      | 3725 Jun oncogene                                                                                                  | 5.84   | 0.00 |
| 200079_s_at  | <b>KARS</b>     | 3735 lysyl-tRNA synthetase                                                                                         | 8.70   | 0.00 |
| 223412_at    | <b>KBTBD7</b>   | 84078 kelch repeat and BTB (POZ) domain containing 7                                                               | -16.28 | 0.00 |
| 242887_at    | <b>KCMF1</b>    | 56888 potassium channel modulatory factor 1<br>potassium voltage-gated channel, Shaw-related                       | -3.41  | 0.34 |
| 243893_at    | <b>KCNC3</b>    | 3748 subfamily, member 3<br>potassium voltage-gated channel, Isk-related                                           | 4.68   | 0.00 |
| 227647_at    | <b>KCNE3</b>    | 10008 family, member 3<br>potassium voltage-gated channel, subfamily H                                             | -2.58  | 0.00 |
| 224099_at    | <b>KCNH7</b>    | 90134 (eag-related), member 7                                                                                      | -5.38  | 0.03 |
| 219615_s_at  | <b>KCNK5</b>    | 8645 potassium channel, subfamily K, member 5                                                                      | 2.50   | 0.51 |
| 223823_at    | <b>KCNMB2</b>   | potassium large conductance calcium-activated<br>10242 channel, subfamily M, beta member 2                         | 2.43   | 0.51 |

|              |                  |                                                                           |        |      |
|--------------|------------------|---------------------------------------------------------------------------|--------|------|
| 204487_s_at  | <b>KCNQ1</b>     | 3784 potassium voltage-gated channel, KQT-like subfamily, member 1        | -13.37 | 0.51 |
| 205737_at    | <b>KCNQ2</b>     | 3785 potassium voltage-gated channel, KQT-like subfamily, member 2        | 2.19   | 0.00 |
| 233234_at    | <b>KCTD16</b>    | 57528 potassium channel tetramerisation domain containing 16              | 3.81   | 0.06 |
| 205561_at    | <b>KCTD17</b>    | 79734 potassium channel tetramerisation domain containing 17              | 2.94   | 0.79 |
| 200698_at    | <b>KDELR2</b>    | KDEL (Lys-Asp-Glu-Leu) endoplasmic reticulum protein retention receptor 2 | 2.83   | 0.00 |
| 203712_at    | <b>KIAA0020</b>  | 9933 KIAA0020                                                             | 3.05   | 0.34 |
| 212395_s_at  | <b>KIAA0090</b>  | 23065 KIAA0090                                                            | 9.05   | 0.13 |
| 212150_at    | <b>KIAA0143</b>  | 23167 KIAA0143 protein                                                    | 2.22   | 0.08 |
| 212523_s_at  | <b>KIAA0146</b>  | 23514 KIAA0146                                                            | -3.76  | 0.03 |
| 201985_at    | <b>KIAA0196</b>  | 9897 KIAA0196                                                             | 2.37   | 0.79 |
| 212441_at    | <b>KIAA0232</b>  | 9778 KIAA0232                                                             | -4.98  | 0.25 |
| 212621_at    | <b>KIAA0286</b>  | 23306 KIAA0286 protein                                                    | 2.32   | 0.16 |
| 1554989_at   | <b>KIAA0317</b>  | 9870 KIAA0317                                                             | -2.02  | 0.03 |
| 222468_at    | <b>KIAA0319L</b> | 79932 KIAA0319-like                                                       | -5.88  | 0.08 |
| 203171_s_at  | <b>KIAA0409</b>  | 23378 KIAA0409                                                            | 2.16   | 0.16 |
| 209912_s_at  | <b>KIAA0415</b>  | 9907 KIAA0415                                                             | 3.44   | 0.16 |
| 1558697_a_at | <b>KIAA0430</b>  | 9665 KIAA0430                                                             | -3.93  | 0.00 |
| 204546_at    | <b>KIAA0513</b>  | 9764 KIAA0513                                                             | -4.07  | 0.34 |
| 212943_at    | <b>KIAA0528</b>  | 9847 KIAA0528                                                             | 2.20   | 0.16 |
| 203364_s_at  | <b>KIAA0652</b>  | 9776 KIAA0652                                                             | -3.87  | 0.51 |
| 213118_at    | <b>KIAA0701</b>  | 23074 KIAA0701 protein                                                    | -2.62  | 0.13 |
| 230028_at    | <b>KIAA0907</b>  | 22889 KIAA0907                                                            | 3.98   | 0.25 |
| 209654_at    | <b>KIAA0947</b>  | 23379 KIAA0947 protein                                                    | 4.34   | 0.79 |
| 214929_s_at  | <b>KIAA1109</b>  | 84162 KIAA1109                                                            | -2.58  | 0.51 |
| 223162_s_at  | <b>KIAA1147</b>  | 57189 KIAA1147                                                            | 2.38   | 0.51 |
| 227479_at    | <b>KIAA1244</b>  | 57221 KIAA1244                                                            | 2.01   | 0.51 |
| 1554852_a_at | <b>KIAA1257</b>  | 57501 KIAA1257                                                            | -6.92  | 0.79 |
| 243349_at    | <b>KIAA1324</b>  | 57535 KIAA1324                                                            | -14.98 | 0.07 |
| 228984_at    | <b>KIAA1394</b>  | 57571 KIAA1394 protein                                                    | -2.96  | 0.13 |
| 225922_at    | <b>KIAA1450</b>  | 57600 KIAA1450 protein                                                    | 27.72  | 0.00 |
| 233893_s_at  | <b>KIAA1530</b>  | 57654 KIAA1530 protein                                                    | -2.01  | 0.25 |
| 211433_x_at  | <b>KIAA1539</b>  | 80256 KIAA1539                                                            | -3.87  | 0.00 |
| 1569385_s_at | <b>KIAA1546</b>  | 54790 KIAA1546                                                            | -3.05  | 0.00 |
| 226155_at    | <b>KIAA1600</b>  | 57700 KIAA1600                                                            | -11.68 | 0.00 |
| 232155_at    | <b>KIAA1618</b>  | 57714 KIAA1618                                                            | 3.35   | 0.25 |
| 235552_at    | <b>KIAA1627</b>  | 57721 KIAA1627 protein                                                    | 2.29   | 0.51 |
| 227638_at    | <b>KIAA1632</b>  | 57724 KIAA1632                                                            | 6.80   | 0.06 |
| 229891_x_at  | <b>KIAA1704</b>  | 55425 KIAA1704                                                            | 2.67   | 0.08 |
| 226599_at    | <b>KIAA1727</b>  | 85462 KIAA1727 protein                                                    | 5.55   | 0.08 |
| 226909_at    | <b>KIAA1729</b>  | 85460 KIAA1729 protein                                                    | -3.06  | 0.16 |
| 1565829_at   | <b>KIAA1731</b>  | 85459 KIAA1731                                                            | -2.43  | 0.51 |
| 226691_at    | <b>KIAA1856</b>  | 84629 KIAA1856 protein                                                    | -3.28  | 0.13 |
| 224708_at    | <b>KIAA2013</b>  | 90231 KIAA2013                                                            | -2.27  | 0.08 |
| 209234_at    | <b>KIF1B</b>     | 23095 kinesin family member 1B                                            | -2.83  | 0.13 |
| 209244_s_at  | <b>KIF1C</b>     | 10749 kinesin family member 1C                                            | 2.54   | 0.79 |
| 204411_at    | <b>KIF21B</b>    | 23046 kinesin family member 21B                                           | -3.90  | 0.79 |
| 1557089_at   | <b>KIF5C</b>     | 3800 kinesin family member 5C                                             | 8.92   | 0.00 |
| 202393_s_at  | <b>KLF10</b>     | 7071 Kruppel-like factor 10                                               | 8.36   | 0.00 |
| 208467_at    | <b>KLF12</b>     | 11278 Kruppel-like factor 12                                              | -2.51  | 0.13 |
| 221302_at    | <b>KLF15</b>     | 28999 Kruppel-like factor 15                                              | 2.21   | 0.51 |
| 219371_s_at  | <b>KLF2</b>      | 10365 Kruppel-like factor 2 (lung)                                        | -2.72  | 0.00 |

|              |                    |                                                                              |       |      |
|--------------|--------------------|------------------------------------------------------------------------------|-------|------|
| 219657_s_at  | <b>KLF3</b>        | 51274 Kruppel-like factor 3 (basic)                                          | -5.14 | 0.00 |
| 209211_at    | <b>KLF5</b>        | 688 Kruppel-like factor 5 (intestinal)                                       | 7.67  | 0.00 |
| 204334_at    | <b>KLF7</b>        | 8609 Kruppel-like factor 7 (ubiquitous)                                      | -7.26 | 0.00 |
| 208784_s_at  | <b>KLHDC3</b>      | 116138 kelch domain containing 3                                             | -2.15 | 0.34 |
| 242088_at    | <b>KLHL24</b>      | 54800 kelch-like 24 (Drosophila)                                             | -2.75 | 0.25 |
| 228167_at    | <b>KLHL6</b>       | 89857 kelch-like 6 (Drosophila)                                              | 3.62  | 0.06 |
|              |                    | killer cell lectin-like receptor subfamily B, member                         |       |      |
| 214470_at    | <b>KLRB1</b>       | 3820 1                                                                       | 4.69  | 0.00 |
|              |                    | killer cell lectin-like receptor subfamily C, member                         |       |      |
|              | <b>KLRC4</b> ///   | 22914 ///<br>4 ///<br>4 ///<br>killer cell lectin-like receptor subfamily K, |       |      |
| 1555691_a_at | <b>KLRK1</b>       | 8302 member 1                                                                | 6.18  | 0.51 |
| 202055_at    | <b>KPNA1</b>       | 3836 karyopherin alpha 1 (importin alpha 5)                                  | -2.27 | 0.34 |
|              |                    | karyopherin alpha 2 (RAG cohort 1, importin alpha                            |       |      |
| 201088_at    | <b>KPNA2</b>       | 3838 1)                                                                      | -2.10 | 0.13 |
|              |                    | KRR1, small subunit (SSU) processome                                         |       |      |
| 203202_at    | <b>KRR1</b>        | 11103 component, homolog (yeast)                                             | -3.30 | 0.00 |
| 230835_at    | <b>KRTDAP</b>      | 388533 keratinocyte differentiation-associated protein                       | 3.21  | 0.16 |
| 235252_at    | <b>KSR1</b>        | 8844 Kinase suppressor of ras 1                                              | -3.84 | 0.07 |
|              | <b>Kua-UEV</b> /// | 387522 ///<br>ubiquitin-conjugating enzyme E2 variant 1 ///                  |       |      |
|              | <b>LOC730052</b>   | 730052 ///<br>similar to ubiquitin-conjugating enzyme E2 variant             |       |      |
| 216315_x_at  | <b>UBE2V1</b>      | 7335 1 isoform d                                                             | 2.27  | 0.34 |
|              | <b>Kua-UEV</b> /// | 387522 ///<br>ubiquitin-conjugating enzyme E2 variant 1                      |       |      |
| 201001_s_at  | <b>UBE2V1</b>      | 7335                                                                         | 2.25  | 0.16 |
| 244572_at    | <b>KY</b>          | 339855 kyphoscoliosis peptidase                                              | -2.93 | 0.08 |
| 217388_s_at  | <b>KYNU</b>        | 8942 kynureninase (L-kynurenine hydrolase)                                   | 9.32  | 0.00 |
| 1552486_s_at | <b>LACTB</b>       | 114294 lactamase, beta                                                       | 7.52  | 0.00 |
| 222714_s_at  | <b>LACTB2</b>      | 51110 lactamase, beta 2                                                      | 5.56  | 0.08 |
| 221982_x_at  | <b>LAGE3</b>       | 8270 L antigen family, member 3                                              | 14.02 | 0.06 |
| 209270_at    | <b>LAMB3</b>       | 3914 laminin, beta 3                                                         | 23.83 | 0.00 |
| 205569_at    | <b>LAMP3</b>       | 27074 lysosomal-associated membrane protein 3                                | 27.36 | 0.16 |
| 217933_s_at  | <b>LAP3</b>        | 51056 leucine aminopeptidase 3                                               | 27.55 | 0.00 |
| 212137_at    | <b>LARP1</b>       | 23367 La ribonucleoprotein domain family, member 1                           | 4.74  | 0.06 |
| 238959_at    | <b>LARP4</b>       | 113251 La ribonucleoprotein domain family, member 4                          | 2.18  | 0.25 |
| 235463_s_at  | <b>LASS6</b>       | 253782 LAG1 homolog, ceramide synthase 6                                     | 5.97  | 0.08 |
| 221581_s_at  | <b>LAT2</b>        | 7462 linker for activation of T cells family, member 2                       | -2.02 | 0.00 |
| 213261_at    | <b>LBA1</b>        | 9881 lupus brain antigen 1                                                   | -2.54 | 0.25 |
| 201795_at    | <b>LBR</b>         | 3930 lamin B receptor                                                        | -2.33 | 0.00 |
| 212531_at    | <b>LCN2</b>        | 3934 lipocalin 2 (oncogene 24p3)                                             | -2.77 | 0.16 |
| 1563899_at   | <b>LCTL</b>        | 197021 lactase-like                                                          | 2.23  | 0.02 |
| 210712_at    | <b>LDHAL6B</b>     | 92483 lactate dehydrogenase A-like 6B                                        | 2.02  | 0.51 |
| 232018_at    | <b>LENG1</b>       | 79165 leukocyte receptor cluster (LRC) member 1                              | 2.11  | 0.16 |
|              |                    | Leo1, Paf1/RNA polymerase II complex                                         |       |      |
| 235096_at    | <b>LEO1</b>        | 123169 component, homolog (S. cerevisiae)                                    | 6.92  | 0.25 |
| 207092_at    | <b>LEP</b>         | 3952 leptin (obesity homolog, mouse)                                         | 2.39  | 0.34 |
| 201105_at    | <b>LGALS1</b>      | 3956 lectin, galactoside-binding, soluble, 1 (galectin 1)                    | 3.81  | 0.51 |
| 208949_s_at  | <b>LGALS3</b>      | 3958 lectin, galactoside-binding, soluble, 3                                 | 21.91 | 0.00 |
| 208934_s_at  | <b>LGALS8</b>      | 3964 lectin, galactoside-binding, soluble, 8 (galectin 8)                    | 3.92  | 0.08 |
| 201212_at    | <b>LGMN</b>        | 5641 legumain                                                                | 33.00 | 0.00 |
| 212658_at    | <b>LHFPL2</b>      | 10184 lipoma HMGIC fusion partner-like 2                                     | 13.79 | 0.00 |
| 208333_at    | <b>LHX5</b>        | 64211 LIM homeobox 5                                                         | 2.47  | 0.00 |
|              |                    | leukocyte immunoglobulin-like receptor, subfamily                            |       |      |
| 210660_at    | <b>LILRA1</b>      | 11024 A (with TM domain), member 1                                           | -4.68 | 0.00 |
|              |                    | leukocyte immunoglobulin-like receptor, subfamily                            |       |      |
| 207857_at    | <b>LILRA2</b>      | 11027 A (with TM domain), member 2                                           | -2.21 | 0.00 |

|              |                  |                                                                                           |        |      |
|--------------|------------------|-------------------------------------------------------------------------------------------|--------|------|
|              |                  | leukocyte immunoglobulin-like receptor, subfamily                                         |        |      |
| 1555643_s_at | <b>LILRA5</b>    | 353514 A (with TM domain), member 5                                                       | -3.10  | 0.34 |
| 218600_at    | <b>LIMD2</b>     | 80774 LIM domain containing 2                                                             | -6.71  | 0.00 |
| 212687_at    | <b>LIMS1</b>     | 3987 LIM and senescent cell antigen-like domains 1                                        | 5.07   | 0.00 |
| 206440_at    | <b>LIN7A</b>     | 8825 lin-7 homolog A (C. elegans)                                                         | -12.81 | 0.00 |
| 223350_x_at  | <b>LIN7C</b>     | 55327 lin-7 homolog C (C. elegans)                                                        | 3.67   | 0.00 |
|              |                  | likely ortholog of mouse lung-inducible Neutralized-                                      |        |      |
| 232593_at    | <b>LINCR</b>     | 93082 related C3HC4 RING domain protein<br>lipase A, lysosomal acid, cholesterol esterase | 5.67   | 0.06 |
| 201847_at    | <b>LIPA</b>      | 3988 (Wolman disease)                                                                     | 28.46  | 0.08 |
| 224629_at    | <b>LMAN1</b>     | 3998 Lectin, mannose-binding, 1                                                           | 5.22   | 0.34 |
| 218191_s_at  | <b>LMBRD1</b>    | 55788 LMBR1 domain containing 1                                                           | -4.49  | 0.00 |
| 225808_at    | <b>LOC124512</b> | 124512 hypothetical protein LOC124512                                                     | 3.26   | 0.00 |
|              |                  | 128192 ///                                                                                |        |      |
|              |                  | 131691 ///                                                                                |        |      |
|              |                  | 202227 ///                                                                                |        |      |
|              |                  | 341457 ///                                                                                |        |      |
|              |                  | 342541 ///                                                                                |        |      |
|              |                  | 390299 ///                                                                                |        |      |
|              |                  | 390419 ///                                                                                |        |      |
|              |                  | 390791 ///                                                                                |        |      |
|              |                  | 391532 ///                                                                                |        |      |
|              |                  | 401859 ///                                                                                |        |      |
|              |                  | 402213 ///                                                                                |        |      |
|              |                  | 439953 ///                                                                                |        |      |
|              |                  | 440063 ///                                                                                |        |      |
|              |                  | 442336 ///                                                                                |        |      |
|              |                  | 442713 ///                                                                                |        |      |
|              |                  | 5478 /// peptidylprolyl isomerase A (cyclophilin A) ///                                   |        |      |
|              |                  | 643997 /// similar to peptidylprolyl isomerase A isoform 1 ///                            |        |      |
|              |                  | 653214 /// peptidylprolyl isomerase A (cyclophilin A)                                     |        |      |
|              |                  | 654188 /// pseudogene 8 /// similar to peptidylprolyl                                     |        |      |
|              |                  | 728322 /// isomerase A /// peptidylprolyl isomerase A                                     |        |      |
| 217346_at    | <b>#####</b>     | 730794 (cyclophilin A)-like 3                                                             | -2.67  | 0.07 |
| 226702_at    | <b>LOC129607</b> | 129607 hypothetical protein LOC129607                                                     | 3.33   | 0.00 |
| 225493_at    | <b>LOC144438</b> | 144438 hypothetical protein LOC144438                                                     | 2.28   | 0.16 |
| 226513_at    | <b>LOC145758</b> | 145758 hypothetical protein LOC145758                                                     | -3.03  | 0.51 |
| 1557049_at   | <b>LOC149478</b> | 149478 Hypothetical protein LOC149478                                                     | 17.15  | 0.34 |
| 230502_s_at  | <b>LOC149832</b> | 149832 Hypothetical protein LOC149832                                                     | -2.37  | 0.34 |
| 229101_at    | <b>LOC150166</b> | 150166 Hypothetical protein LOC150166                                                     | -3.03  | 0.00 |
| 1560679_at   | <b>LOC151438</b> | 151438 hypothetical protein LOC151438                                                     | -14.51 | 0.03 |
| 1558565_at   | <b>LOC158267</b> | 158267 hypothetical protein LOC158267                                                     | -2.90  | 0.34 |
| 227792_at    | <b>LOC162073</b> | 162073 hypothetical protein LOC162073                                                     | 11.98  | 0.02 |
| 227037_at    | <b>LOC201164</b> | 201164 similar to CG12314 gene product                                                    | 2.77   | 0.51 |
| 232034_at    | <b>LOC203274</b> | 203274 hypothetical protein LOC203274                                                     | -13.56 | 0.00 |
| 1564385_at   | <b>LOC219688</b> | 219688 hypothetical protein LOC219688                                                     | 3.63   | 0.16 |

|              |                             |                                               |                                          |                                  |
|--------------|-----------------------------|-----------------------------------------------|------------------------------------------|----------------------------------|
|              | <b>LOC23117</b> ///         |                                               |                                          |                                  |
|              | <b>LOC339047</b>            |                                               |                                          |                                  |
|              | ///                         |                                               |                                          |                                  |
|              | <b>LOC642778</b> 23117 ///  |                                               |                                          |                                  |
|              | ///                         | 339047 ///                                    |                                          |                                  |
|              | <b>LOC642799</b> 642778 /// | KIAA0220-like protein ///                     | hypothetical protein                     |                                  |
|              | ///                         | 642799 ///                                    | LOC339047 ///                            | similar to nuclear pore complex  |
| 215123_at    | <b>LOC728888</b> 728888     | interacting protein ///                       | similar to Protein KIAA0220              | 2.71 0.06                        |
| 222154_s_at  | <b>LOC26010</b> 26010       | viral DNA polymerase-transactivated protein 6 |                                          | 4.70 0.25                        |
| 237032_x_at  | <b>LOC283567</b> 283567     | hypothetical protein LOC283567                |                                          | 4.68 0.13                        |
| 1559363_at   | <b>LOC283587</b> 283587     | hypothetical protein LOC283587                |                                          | 12.50 0.25                       |
| 1557113_at   | <b>LOC283588</b> 283588     | hypothetical protein LOC283588                |                                          | -8.49 0.25                       |
| 1564373_a_at | <b>LOC283887</b> 283887     | hypothetical protein LOC283887                |                                          | -2.09 0.79                       |
| 1558525_at   | <b>LOC283901</b> 283901     | hypothetical protein LOC283901                |                                          | -17.31 0.07                      |
| 234664_at    | <b>LOC284701</b> 284701     | hypothetical protein LOC284701                |                                          | -2.98 0.34                       |
| 242852_at    | <b>LOC285147</b> 285147     | hypothetical protein LOC285147                |                                          | -3.27 0.51                       |
| 226159_at    | <b>LOC285636</b> 285636     | hypothetical protein LOC285636                |                                          | 4.23 0.00                        |
| 1557359_at   | <b>LOC285758</b> 285758     | hypothetical protein LOC285758                |                                          | 17.85 0.34                       |
| 1560762_at   | <b>LOC285972</b> 285972     | hypothetical protein LOC285972                |                                          | 26.03 0.25                       |
| 222662_at    | <b>LOC286044</b> 286044     | hypothetical protein LOC286044                |                                          | -5.03 0.00                       |
| 241370_at    | <b>LOC286052</b> 286052     | hypothetical protein LOC286052                |                                          | -10.44 0.34                      |
| 243304_at    | <b>LOC286109</b> 286109     | hypothetical protein LOC286109                |                                          | -3.13 0.07                       |
| 224158_s_at  | <b>LOC286144</b> 286144     | hypothetical protein LOC286144                |                                          | -3.33 0.03                       |
| 225659_at    | <b>LOC339745</b> 339745     | hypothetical protein LOC339745                |                                          | -2.06 0.00                       |
| 1562638_at   | <b>LOC339874</b> 339874     | hypothetical LOC339874                        |                                          | 2.97 0.08                        |
|              | <b>LOC340089</b>            |                                               |                                          |                                  |
|              | ///                         |                                               |                                          |                                  |
|              | <b>LOC441081</b>            |                                               |                                          |                                  |
|              | ///                         |                                               |                                          |                                  |
|              | <b>LOC643367</b>            |                                               |                                          |                                  |
|              | ///                         |                                               |                                          |                                  |
|              | <b>LOC728452</b>            |                                               |                                          |                                  |
|              | ///                         |                                               |                                          |                                  |
|              | <b>LOC728488</b>            |                                               |                                          |                                  |
|              | ///                         |                                               |                                          |                                  |
|              | <b>LOC728499</b> 340089 /// |                                               |                                          |                                  |
|              | ///                         | 441081 ///                                    |                                          |                                  |
|              | ///                         | 643367 ///                                    |                                          |                                  |
|              | <b>LOC728506</b> 728452 /// |                                               |                                          |                                  |
|              | ///                         | 728488 ///                                    |                                          |                                  |
|              | <b>LOC728526</b> 728499 /// |                                               |                                          |                                  |
|              | ///                         | 728506 ///                                    |                                          |                                  |
|              | <b>LOC728540</b> 728526 /// | POM121 membrane glycoprotein (rat)            |                                          |                                  |
|              | ///                         | 728540 ///                                    | pseudogene ///                           | similar to Nuclear envelope pore |
|              | <b>LOC728575</b> 728575 /// | membrane protein POM 121 (Pore membrane       |                                          |                                  |
| 1558011_at   | ///                         | 730392                                        | protein of 121 kDa) (P145)               | -5.61 0.00                       |
| 1558425_x_at | <b>LOC349114</b> 349114     | hypothetical LOC349114                        |                                          | -6.95 0.00                       |
| 232801_at    | <b>LOC375748</b> 375748     | RAD26L hypothetical protein                   |                                          | -2.36 0.51                       |
| 230445_at    | <b>LOC388419</b> 388419     | galectin-3-binding protein-like               |                                          | -2.03 0.00                       |
| 241998_at    | <b>LOC389073</b> 389073     | similar to RIKEN cDNA D630023F18              |                                          | 13.72 0.06                       |
| 1560841_at   | <b>LOC389247</b> 389247     | hypothetical gene supported by BC038563       |                                          | -2.45 0.00                       |
| 224890_s_at  | <b>LOC389541</b> 389541     | similar to CG14977-PA                         |                                          | -3.26 0.00                       |
| 230815_at    | <b>LOC389765</b> 389765     | similar to KIF27C                             |                                          | -10.59 0.13                      |
|              | <b>LOC390354</b> 390354 /// | ribosomal protein L18a ///                    | similar to ribosomal                     |                                  |
| 200869_at    | ///                         | <b>RPL18A</b> 6142                            | protein L18a; 60S ribosomal protein L18a | 2.10 0.51                        |
| 216387_x_at  | <b>LOC390411</b> 390411     | similar to nucleophosmin 1 isoform 1          |                                          | 2.68 0.16                        |
| 1558075_at   | <b>LOC399491</b> 399491     | LOC399491 protein                             |                                          | 3.80 0.06                        |



|              |                   |                                                                                                                                                                                   |        |      |
|--------------|-------------------|-----------------------------------------------------------------------------------------------------------------------------------------------------------------------------------|--------|------|
| 200063_s_at  | <b>LOC399804</b>  | 399804 /// nucleophosmin (nucleolar phosphoprotein B23, numatrin) /// similar to nucleophosmin 1 isoform 1                                                                        | 2.48   | 0.00 |
| 236532_at    | /// <b>NPM1</b>   | 4869                                                                                                                                                                              |        |      |
| 243957_at    | <b>LOC399947</b>  | 399947 similar to expressed sequence AI593442                                                                                                                                     | 2.32   | 0.25 |
| 232953_at    | <b>LOC400464</b>  | 400464 similar to FLJ43276 protein                                                                                                                                                | 2.93   | 0.06 |
|              | <b>LOC400723</b>  | 400723 hypothetical LOC400723<br>similar to HIV TAT specific factor 1; cofactor                                                                                                   | -2.40  | 0.79 |
| 1558882_at   | <b>LOC401233</b>  | 401233 required for Tat activation of HIV-1 transcription                                                                                                                         | -3.00  | 0.25 |
| 1558345_a_at | <b>LOC439911</b>  | 439911 hypothetical gene supported by NM_194304                                                                                                                                   | -7.56  | 0.07 |
|              | <b>LOC440345</b>  | ///                                                                                                                                                                               |        |      |
|              | <b>LOC641298</b>  | 440345 /// hypothetical protein LOC440345 /// PI-3-kinase-641298 /// related kinase SMG-1 - like locus /// similar to PI-3-kinase-related kinase SMG-1                            | 3.03   | 0.00 |
| 231989_s_at  | <b>LOC730099</b>  | 730099                                                                                                                                                                            |        |      |
| 238727_at    | <b>LOC440934</b>  | 440934 Hypothetical gene supported by BC008048                                                                                                                                    | 87.94  | 0.00 |
|              | <b>LOC442240</b>  | 442240 /// zinc finger protein 259 /// similar to zinc finger protein 259                                                                                                         | 12.12  | 0.00 |
| 200054_at    | /// <b>ZNF259</b> | 8882                                                                                                                                                                              |        |      |
| 238788_at    | <b>LOC494150</b>  | 494150 prohibitin pseudogene                                                                                                                                                      | -3.19  | 0.51 |
| 225029_at    | <b>LOC550643</b>  | 550643 hypothetical protein LOC550643                                                                                                                                             | 7.71   | 0.13 |
| 232135_at    | <b>LOC56755</b>   | 56755 hypothetical protein LOC56755                                                                                                                                               | -5.97  | 0.13 |
| 238449_at    | <b>LOC595101</b>  | 595101 PI-3-kinase-related kinase SMG-1 pseudogene                                                                                                                                | 2.63   | 0.51 |
|              | <b>LOC641912</b>  | ///                                                                                                                                                                               |        |      |
| 1562749_at   | <b>LOC644090</b>  | 641912 /// hypothetical protein LOC641912 /// hypothetical LOC644090                                                                                                              | 2.35   | 0.16 |
| 243656_at    | <b>LOC642852</b>  | 642852 hypothetical LOC642852                                                                                                                                                     | -3.55  | 0.00 |
| 228412_at    | <b>LOC643072</b>  | 643072 hypothetical LOC643072                                                                                                                                                     | -10.49 | 0.51 |
| 229224_x_at  | <b>LOC643085</b>  | 643085 hypothetical LOC643085<br>RNA binding motif protein 39 /// similar to RNA-binding region-containing protein 2                                                              | 3.16   | 0.08 |
|              | <b>LOC643167</b>  | 643167 /// (Hepatocellular carcinoma protein 1) (Splicing factor HCC1)                                                                                                            | -2.46  | 0.16 |
| 226404_at    | /// <b>RBM39</b>  | 9584                                                                                                                                                                              |        |      |
| 226808_at    | <b>LOC643641</b>  | 643641 hypothetical protein LOC643641                                                                                                                                             | -5.37  | 0.03 |
| 1557055_s_at | <b>LOC643837</b>  | 643837 hypothetical protein LOC643837                                                                                                                                             | 16.08  | 0.00 |
| 239117_at    | <b>LOC643950</b>  | 643950 hypothetical LOC643950<br>v-maf musculoaponeurotic fibrosarcoma oncogene homolog G (avian) /// similar to v-maf musculoaponeurotic fibrosarcoma oncogene family, protein G | -5.30  | 0.13 |
| 224466_s_at  | <b>LOC644132</b>  | 4097 ///                                                                                                                                                                          | 4.94   | 0.00 |
|              | /// <b>MAFG</b>   | 644132                                                                                                                                                                            |        |      |
|              | <b>LOC644166</b>  | ///                                                                                                                                                                               |        |      |
|              | <b>LOC644191</b>  | 6231 ///                                                                                                                                                                          |        |      |
|              | ///               | 644166 ///                                                                                                                                                                        |        |      |
| 217753_s_at  | <b>LOC728937</b>  | 644191 /// ribosomal protein S26 /// similar to 40S ribosomal protein S26                                                                                                         | 2.98   | 0.02 |
|              | /// <b>RPS26</b>  | 728937                                                                                                                                                                            |        |      |
| 201874_at    | <b>LOC644387</b>  | 644387 /// myelin protein zero-like 1 /// similar to myelin protein zero-like 1 isoform a                                                                                         | -15.94 | 0.00 |
|              | /// <b>MPZL1</b>  | 9019                                                                                                                                                                              |        |      |
|              | <b>LOC645899</b>  | ///                                                                                                                                                                               |        |      |
|              | ///               | 6234 ///                                                                                                                                                                          |        |      |
| 208904_s_at  | <b>LOC646195</b>  | 645899 /// ribosomal protein S28 /// ribosomal protein S28 pseudogene                                                                                                             | 2.40   | 0.02 |
|              | /// <b>RPS28</b>  | 646195                                                                                                                                                                            |        |      |
|              | <b>LOC646208</b>  | ///                                                                                                                                                                               |        |      |
|              | <b>LOC654174</b>  | 11049 ///                                                                                                                                                                         |        |      |
|              | ///               | 646208 /// YDD19 protein /// hypothetical LOC646208 ///                                                                                                                           |        |      |
| 215207_x_at  | <b>LOC729148</b>  | 654174 /// similar to CG4775-PA /// similar to lethal (2)                                                                                                                         | 5.82   | 0.06 |
| 231467_at    | /// <b>YDD19</b>  | 729148                                                                                                                                                                            |        |      |
| 230775_s_at  | <b>LOC646590</b>  | 646590 Hypothetical LOC646590                                                                                                                                                     | -2.47  | 0.25 |
| 226789_at    | <b>LOC646871</b>  | 646871 hypothetical LOC646871                                                                                                                                                     | 7.77   | 0.00 |
|              | <b>LOC647121</b>  | 647121 similar to embigin homolog                                                                                                                                                 | -5.75  | 0.00 |

|              |                                                                                                                      |                                                     |                                                                                                                                                                                                                  |        |      |
|--------------|----------------------------------------------------------------------------------------------------------------------|-----------------------------------------------------|------------------------------------------------------------------------------------------------------------------------------------------------------------------------------------------------------------------|--------|------|
| 1566473_a_at | <b>LOC647305</b>                                                                                                     | 647305                                              | Similar to all-trans-13,14-dihydroretinol saturase                                                                                                                                                               | -2.15  | 0.34 |
|              |                                                                                                                      |                                                     | SET domain containing (lysine methyltransferase) 8 /// similar to Histone-lysine N-methyltransferase, H4 lysine-20 specific (Histone H4-K20 methyltransferase) (H4-K20-HMTase) (SET                              |        |      |
| 220200_s_at  | <b>LOC647597</b><br>/// <b>SETD8</b>                                                                                 | 387893 ///<br>647597                                | domain-containing protein 8) (PR/SET domain-containing protein 07) (PR/SET07) (PR-Set7)                                                                                                                          | -3.05  | 0.51 |
|              | <b>LOC648998</b><br>///                                                                                              |                                                     | similar to Neutrophil cytosol factor 1 (NCF-1) (Neutrophil NADPH oxidase factor 1) (47 kDa neutrophil oxidase factor) (p47-phox) (NCF-47K)                                                                       |        |      |
|              | <b>LOC652625</b><br>///                                                                                              | 648998 ///<br>652625 ///                            | (47 kDa autosomal chronic granulomatous disease protein) (NOXO2) /// neutrophil cytosolic                                                                                                                        |        |      |
|              | <b>LOC652699</b><br>/// <b>NCF1</b> ///                                                                              | 652699 ///<br>653361 ///                            | factor 1, (chronic granulomatous disease, autosomal 1) /// neutrophil cytosolic factor 1B                                                                                                                        |        |      |
| 214084_x_at  | <b>NCF1B</b> ///<br><b>NCF1C</b>                                                                                     | 654816 ///<br>654817                                | pseudogene /// neutrophil cytosolic factor 1C pseudogene                                                                                                                                                         | -2.18  | 0.00 |
|              |                                                                                                                      |                                                     | Full-length cDNA clone CS0DF015YK23 of Fetal brain of Homo sapiens (human) /// Hypothetical                                                                                                                      |        |      |
| 1569871_at   | <b>LOC650392</b>                                                                                                     | 650392                                              | protein LOC650392                                                                                                                                                                                                | 4.44   | 0.02 |
| 219762_s_at  | <b>LOC651600</b><br>/// <b>RPL36</b><br><b>LOC653390</b><br>///                                                      | 25873 ///<br>651600<br>54700 ///                    | ribosomal protein L36 /// similar to ribosomal protein L36<br>RRN3 RNA polymerase I transcription factor homolog (S. cerevisiae) /// RRN3 RNA                                                                    | 2.41   | 0.13 |
| 216902_s_at  | <b>LOC730092</b><br>/// <b>RRN3</b>                                                                                  | 653390 ///<br>730092                                | polymerase I transcription factor homolog (S. cerevisiae) pseudogene                                                                                                                                             | 16.14  | 0.13 |
| 218338_at    | <b>LOC653441</b><br>/// <b>PHC1</b>                                                                                  | 1911 ///<br>653441                                  | polyhomeotic homolog 1 (Drosophila) /// similar to polyhomeotic 1-like                                                                                                                                           | 32.06  | 0.06 |
|              |                                                                                                                      |                                                     | meteorin, glial cell differentiation regulator-like ///                                                                                                                                                          |        |      |
| 225955_at    | <b>LOC653506</b><br>/// <b>METRNL</b>                                                                                | 284207 ///<br>653506                                | similar to meteorin, glial cell differentiation regulator-like                                                                                                                                                   | 2.82   | 0.51 |
|              |                                                                                                                      |                                                     | signal peptidase complex subunit 2 homolog (S. cerevisiae) /// signal peptidase complex subunit 2                                                                                                                |        |      |
| 201239_s_at  | <b>LOC653566</b><br>/// <b>SPCS2</b>                                                                                 | 653566 ///<br>9789                                  | homolog pseudogene                                                                                                                                                                                               | 2.35   | 0.25 |
| 217767_at    | <b>LOC653879</b>                                                                                                     | 653879                                              | similar to Complement C3 precursor similar to PRP38 pre-mRNA processing factor 38                                                                                                                                | 25.46  | 0.06 |
| 1561169_at   | <b>LOC727818</b>                                                                                                     | 727818                                              | (yeast) domain containing B                                                                                                                                                                                      | -2.03  | 0.34 |
| 200624_s_at  | <b>LOC727839</b><br>/// <b>MATR3</b>                                                                                 | 727839 ///<br>9782                                  | matrin 3 /// similar to Matrin-3 (Nuclear scaffold protein P130/MAT3)                                                                                                                                            | 2.07   | 0.02 |
| 214129_at    | <b>LOC727942</b>                                                                                                     | 727942                                              | similar to phosphodiesterase 4D interacting protein isoform 2                                                                                                                                                    | 6.89   | 0.08 |
| 230543_at    | <b>LOC728177</b><br><b>LOC728320</b><br>/// <b>LTF</b>                                                               | 728177<br>4057 ///                                  | hypothetical protein LOC728177                                                                                                                                                                                   | -2.29  | 0.51 |
| 202018_s_at  |                                                                                                                      | 728320                                              | lactotransferrin /// similar to lactotransferrin                                                                                                                                                                 | -2.14  | 0.08 |
| 213605_s_at  | <b>LOC728411</b><br><b>LOC728453</b><br>///                                                                          | 728411<br>728453 ///                                | Similar to Beta-glucuronidase precursor                                                                                                                                                                          | -5.24  | 0.51 |
| 216380_x_at  | <b>LOC730288</b><br><b>LOC728661</b><br>/// <b>SLC35E2</b><br><b>LOC728866</b><br>/// <b>RP11-</b><br><b>217H1.1</b> | 730288<br>728661 ///<br>9906<br>728866 ///<br>84061 | similar to 40S ribosomal protein S28<br>solute carrier family 35, member E2 /// similar to solute carrier family 35, member E2<br>implantation-associated protein /// similar to implantation-associated protein | 4.79   | 0.00 |
| 224899_s_at  |                                                                                                                      |                                                     |                                                                                                                                                                                                                  | -10.77 | 0.00 |
| 227710_s_at  | <b>LOC728913</b><br><b>LOC729030</b><br>/// <b>NCK2</b>                                                              | 728913<br>729030 ///<br>8440                        | Similar to Reticulocalbin-1 precursor /// Pp13759<br>NCK adaptor protein 2 /// similar to NCK adaptor protein 2                                                                                                  | 2.12   | 0.00 |
| 203315_at    |                                                                                                                      |                                                     |                                                                                                                                                                                                                  | -2.35  | 0.07 |

|              |                   |               |                                                                                                |        |      |
|--------------|-------------------|---------------|------------------------------------------------------------------------------------------------|--------|------|
| 203837_at    | <b>LOC729144</b>  | 4217          | /// mitogen-activated protein kinase kinase 5                                                  |        |      |
| 1570541_s_at | <b>/// MAP3K5</b> | 729144        | /// hypothetical protein LOC729144                                                             | -5.40  | 0.00 |
| 216908_x_at  | <b>LOC729936</b>  | 729936        | Similar to guanylate binding protein 3                                                         | 10.08  | 0.00 |
| 240287_at    | <b>LOC730092</b>  | 730092        | RRN3 RNA polymerase I transcription factor                                                     |        |      |
| 240287_at    | <b>LOC730249</b>  | 730249        | homolog (S. cerevisiae) pseudogene                                                             | 18.87  | 0.00 |
|              | <b>LOC730295</b>  |               | similar to Immune-responsive protein 1                                                         | 16.08  | 0.00 |
|              | <b>///</b>        | <b>730295</b> | <b>///</b>                                                                                     |        |      |
| 244743_x_at  | <b>LOC731265</b>  | 731265        | /// zinc finger protein 138                                                                    |        |      |
|              | <b>/// ZNF138</b> | 7697          | /// similar to Zinc finger protein 431                                                         | -2.41  | 0.25 |
| 216234_s_at  | <b>LOC730418</b>  | 5566          | /// protein kinase, cAMP-dependent, catalytic, alpha                                           |        |      |
|              | <b>/// PRKACA</b> | 730418        | /// similar to protein kinase, cAMP-dependent, catalytic, gamma                                | -4.30  | 0.13 |
| 207922_s_at  | <b>LOC730744</b>  | 10296         | /// macrophage erythroblast attacher                                                           |        |      |
|              | <b>/// MAEA</b>   | 730744        | /// similar to macrophage erythroblast attacher                                                | -3.15  | 0.03 |
| 235536_at    | <b>LOC731208</b>  | 284996        | /// ring finger protein 149                                                                    |        |      |
|              | <b>/// RNF149</b> | 731208        | /// similar to ring finger protein 149                                                         | -2.05  | 0.00 |
|              |                   |               | phosphatase and tensin homolog (mutated in multiple advanced cancers 1)                        |        |      |
|              |                   |               | phosphatase and tensin homolog (mutated in multiple advanced cancers 1), pseudogene 1          |        |      |
|              |                   |               | similar to Phosphatidylinositol-3,4,5-trisphosphate 3-phosphatase and dual-specificity protein |        |      |
| 217492_s_at  | <b>LOC731292</b>  | 11191         | /// phosphatase PTEN (Phosphatase and tensin homolog)                                          |        |      |
|              | <b>/// PTEN</b>   | 5728          | /// (Mutated in multiple advanced cancers 1)                                                   | -2.65  | 0.00 |
| 1569095_at   | <b>PTENP1</b>     | 731292        | 1)                                                                                             |        |      |
|              | <b>LOC731424</b>  | 731424        | hypothetical protein LOC731424                                                                 | 5.60   | 0.00 |
|              |                   |               | matrix metalloproteinase 19                                                                    |        |      |
| 204575_s_at  | <b>LOC732415</b>  | 4327          | /// similar to Matrix metalloproteinase-19 precursor (MMP-19)                                  |        |      |
|              | <b>/// MMP19</b>  | 732415        | /// (Matrix metalloproteinase RASI) (MMP-18)                                                   | 14.50  | 0.08 |
| 226842_at    | <b>LOC90110</b>   | 90110         | hypothetical protein LOC90110                                                                  | -12.99 | 0.08 |
| 228993_s_at  | <b>LOC92482</b>   | 92482         | hypothetical protein LOC92482                                                                  | -2.47  | 0.00 |
| 214791_at    | <b>LOC93349</b>   | 93349         | hypothetical protein BC004921                                                                  | 3.78   | 0.25 |
| 205011_at    | <b>LOH11CR2A</b>  | 4013          | loss of heterozygosity, 11, chromosomal region 2, gene A                                       | 4.70   | 0.13 |
| 209017_s_at  | <b>LONP1</b>      | 9361          | lon peptidase 1, mitochondrial                                                                 | 4.36   | 0.08 |
|              |                   |               | LON peptidase N-terminal domain and ring finger                                                |        |      |
| 226038_at    | <b>LONRF1</b>     | 91694         | 1                                                                                              | 4.87   | 0.00 |
| 202651_at    | <b>LPGAT1</b>     | 9926          | lysophosphatidylglycerol acyltransferase 1                                                     | -2.69  | 0.00 |
| 202459_s_at  | <b>LPIN2</b>      | 9663          | lipin 2                                                                                        | -2.47  | 0.07 |
|              |                   |               | lipid phosphate phosphatase-related protein type                                               |        |      |
| 218509_at    | <b>LPPR2</b>      | 64748         | 2                                                                                              | -5.04  | 0.13 |
| 216250_s_at  | <b>LPXN</b>       | 9404          | leupaxin                                                                                       | 4.60   | 0.51 |
| 235126_at    | <b>LQK1</b>       | 642946        | LQK1 hypothetical protein short isoform                                                        | -10.00 | 0.79 |
| 1554273_a_at | <b>LRAP</b>       | 64167         | leukocyte-derived arginine aminopeptidase                                                      | 12.54  | 0.00 |
|              |                   |               | leucine-rich repeats and calponin homology (CH)                                                |        |      |
| 214739_at    | <b>LRCH3</b>      | 84859         | domain containing 3                                                                            | 4.48   | 0.25 |
|              |                   |               | leucine rich repeat and fibronectin type III domain                                            |        |      |
| 232486_at    | <b>LRFN1</b>      | 57622         | containing 1                                                                                   | -2.26  | 0.34 |
| 204674_at    | <b>LRMP</b>       | 4033          | lymphoid-restricted membrane protein                                                           | -19.56 | 0.00 |
|              |                   |               | low density lipoprotein-related protein 1 (alpha-2-                                            |        |      |
| 200784_s_at  | <b>LRP1</b>       | 4035          | macroglobulin receptor)                                                                        | 2.33   | 0.34 |
| 201412_at    | <b>LRP10</b>      | 26020         | low density lipoprotein receptor-related protein 10                                            | -5.90  | 0.00 |
| 219631_at    | <b>LRP12</b>      | 29967         | low density lipoprotein-related protein 12                                                     | 3.74   | 0.00 |
| 1559502_s_at | <b>LRRC25</b>     | 126364        | leucine rich repeat containing 25                                                              | -3.06  | 0.34 |
| 203835_at    | <b>LRRC32</b>     | 2615          | leucine rich repeat containing 32                                                              | 5.83   | 0.16 |
| 229231_at    | <b>LRRC37B</b>    | 114659        | leucine rich repeat containing 37B                                                             | -2.67  | 0.16 |
| 223552_at    | <b>LRRC4</b>      | 64101         | leucine rich repeat containing 4                                                               | -10.07 | 0.07 |

|              |                  |                                                                                                           |        |      |
|--------------|------------------|-----------------------------------------------------------------------------------------------------------|--------|------|
| 222231_s_at  | <b>LRRC59</b>    | 55379 leucine rich repeat containing 59                                                                   | 2.88   | 0.79 |
| 206483_at    | <b>LRRC6</b>     | 23639 leucine rich repeat containing 6                                                                    | -4.21  | 0.07 |
| 223533_at    | <b>LRRC8C</b>    | 84230 leucine rich repeat containing 8 family, member C                                                   | 5.32   | 0.16 |
| 226884_at    | <b>LRRN1</b>     | 57633 leucine rich repeat neuronal 1                                                                      | -27.67 | 0.79 |
| 1568667_s_at | <b>LSDP5</b>     | 440503 lipid storage droplet protein 5                                                                    | 2.23   | 0.06 |
| 221536_s_at  | <b>LSG1</b>      | 55341 large subunit GTPase 1 homolog (S. cerevisiae)                                                      | 7.67   | 0.25 |
| 225748_at    | <b>LTV1</b>      | 84946 LTV1 homolog (S. cerevisiae)                                                                        | 4.89   | 0.00 |
| 226758_at    | <b>LUC7L2</b>    | 51631 LUC7-like 2 (S. cerevisiae)                                                                         | 4.38   | 0.34 |
| 215967_s_at  | <b>LY9</b>       | 4063 lymphocyte antigen 9                                                                                 | 3.82   | 0.34 |
| 226996_at    | <b>LYCAT</b>     | 253558 lysocardiolipin acyltransferase                                                                    | -2.66  | 0.79 |
| 221311_x_at  | <b>LYRM2</b>     | 57226 LYR motif containing 2                                                                              | 6.13   | 0.13 |
| 218561_s_at  | <b>LYRM4</b>     | 57128 LYR motif containing 4                                                                              | 5.68   | 0.06 |
| 239960_x_at  | <b>LYRM7</b>     | 90624 Lym7 homolog (mouse)                                                                                | 3.99   | 0.34 |
| 210943_s_at  | <b>LYST</b>      | 1130 lysosomal trafficking regulator<br>mannose-6-phosphate receptor (cation<br>dependent)                | -3.37  | 0.00 |
| 200900_s_at  | <b>M6PR</b>      | 4074 dependent)                                                                                           | 9.94   | 0.00 |
| 202122_s_at  | <b>M6PRBP1</b>   | 10226 mannose-6-phosphate receptor binding protein 1                                                      | -2.27  | 0.25 |
| 210252_s_at  | <b>MADD</b>      | 8567 MAP-kinase activating death domain<br>v-maf musculoaponeurotic fibrosarcoma                          | -2.66  | 0.51 |
| 209348_s_at  | <b>MAF</b>       | 4094 oncogene homolog (avian)<br>v-maf musculoaponeurotic fibrosarcoma                                    | 5.23   | 0.02 |
| 218559_s_at  | <b>MAFB</b>      | 9935 oncogene homolog B (avian)<br>v-maf musculoaponeurotic fibrosarcoma                                  | 10.32  | 0.00 |
| 36711_at     | <b>MAFF</b>      | 23764 oncogene homolog F (avian)<br>v-maf musculoaponeurotic fibrosarcoma                                 | 24.40  | 0.00 |
| 226206_at    | <b>MAFK</b>      | 7975 oncogene homolog K (avian)                                                                           | 2.59   | 0.51 |
| 224480_s_at  | <b>MAG1</b>      | 84803 lung cancer metastasis-associated protein                                                           | -2.00  | 0.07 |
| 218176_at    | <b>MAGEF1</b>    | 64110 melanoma antigen family F, 1                                                                        | -3.25  | 0.34 |
| 220302_at    | <b>MAK</b>       | 4117 male germ cell-associated kinase                                                                     | -12.90 | 0.00 |
| 235106_at    | <b>MAML2</b>     | 84441 mastermind-like 2 (Drosophila)                                                                      | 7.79   | 0.00 |
| 242794_at    | <b>MAML3</b>     | 55534 mastermind-like 3 (Drosophila)                                                                      | -12.18 | 0.07 |
| 202032_s_at  | <b>MAN2A2</b>    | 4122 mannosidase, alpha, class 2A, member 2                                                               | -2.66  | 0.00 |
| 214703_s_at  | <b>MAN2B2</b>    | 23324 mannosidase, alpha, class 2B, member 2                                                              | -2.74  | 0.25 |
| 202670_at    | <b>MAP2K1</b>    | 5604 mitogen-activated protein kinase kinase 1<br>mitogen-activated protein kinase kinase 1               | 2.36   | 0.00 |
| 217971_at    | <b>MAP2K1IP1</b> | 8649 interacting protein 1                                                                                | 2.07   | 0.00 |
| 203266_s_at  | <b>MAP2K4</b>    | 6416 mitogen-activated protein kinase kinase 4                                                            | -8.06  | 0.00 |
| 225927_at    | <b>MAP3K1</b>    | 4214 mitogen-activated protein kinase kinase kinase 1                                                     | -3.10  | 0.00 |
| 227073_at    | <b>MAP3K2</b>    | 10746 mitogen-activated protein kinase kinase kinase 2                                                    | -2.45  | 0.00 |
| 203514_at    | <b>MAP3K3</b>    | 4215 mitogen-activated protein kinase kinase kinase 3                                                     | -7.19  | 0.00 |
| 203836_s_at  | <b>MAP3K5</b>    | 4217 mitogen-activated protein kinase kinase kinase 5<br>mitogen-activated protein kinase kinase kinase 7 | -4.59  | 0.25 |
| 1558518_at   | <b>MAP3K7IP3</b> | 257397 interacting protein 3                                                                              | 2.38   | 0.51 |
| 202890_at    | <b>MAP7</b>      | 9053 microtubule-associated protein 7                                                                     | -2.28  | 0.34 |
| 229847_at    | <b>MAPK1</b>     | 5594 Mitogen-activated protein kinase 1                                                                   | -3.03  | 0.00 |
| 202530_at    | <b>MAPK14</b>    | 1432 mitogen-activated protein kinase 14                                                                  | -5.09  | 0.00 |
| 204708_at    | <b>MAPK4</b>     | 5596 mitogen-activated protein kinase 4                                                                   | -2.01  | 0.00 |
| 207121_s_at  | <b>MAPK6</b>     | 5597 mitogen-activated protein kinase 6                                                                   | 12.41  | 0.00 |
| 1558839_at   | <b>MAPKBP1</b>   | 23005 mitogen activated protein kinase binding protein 1                                                  | 3.65   | 0.00 |
| 210075_at    | <b>MARCH2</b>    | 51257 membrane-associated ring finger (C3HC4) 2                                                           | -2.46  | 0.51 |

|              |                  |                                                                                                          |        |      |
|--------------|------------------|----------------------------------------------------------------------------------------------------------|--------|------|
| 230112_at    | <b>MARCH4</b>    | 57574 membrane-associated ring finger (C3HC4) 4                                                          | -2.07  | 0.34 |
| 221824_s_at  | <b>MARCH8</b>    | 220972 membrane-associated ring finger (C3HC4) 8                                                         | -3.06  | 0.25 |
| 213045_at    | <b>MAST3</b>     | 23031 microtubule associated serine/threonine kinase 3                                                   | -3.61  | 0.07 |
| 200768_s_at  | <b>MAT2A</b>     | 4144 methionine adenosyltransferase II, alpha                                                            | 2.67   | 0.06 |
| 209579_s_at  | <b>MBD4</b>      | 8930 methyl-CpG binding domain protein 4<br>membrane bound O-acyltransferase domain                      | -2.22  | 0.03 |
| 227379_at    | <b>MBOAT1</b>    | 154141 containing 1<br>membrane bound O-acyltransferase domain                                           | -4.58  | 0.00 |
| 226726_at    | <b>MBOAT2</b>    | 129642 containing 2                                                                                      | -18.97 | 0.03 |
| 209624_s_at  | <b>MCCC2</b>     | 64087 methylcrotonoyl-Coenzyme A carboxylase 2 (beta)                                                    | 5.04   | 0.51 |
| 212246_at    | <b>MCFD2</b>     | 90411 multiple coagulation factor deficiency 2                                                           | 3.09   | 0.13 |
| 202556_s_at  | <b>MCRS1</b>     | 10445 microspherule protein 1                                                                            | 2.13   | 0.13 |
| 220122_at    | <b>MCTP1</b>     | 79772 multiple C2 domains, transmembrane 1                                                               | 2.46   | 0.00 |
| 243109_at    | <b>MCTP2</b>     | 55784 multiple C2 domains, transmembrane 2                                                               | -15.14 | 0.00 |
| 217599_s_at  | <b>MDFIC</b>     | 29969 MyoD family inhibitor domain containing                                                            | 2.16   | 0.79 |
| 1569484_s_at | <b>MDN1</b>      | 23195 MDN1, midasin homolog (yeast)                                                                      | 2.00   | 0.13 |
| 225456_at    | <b>MED1</b>      | 5469 mediator complex subunit 1                                                                          | 2.41   | 0.16 |
| 1553993_s_at | <b>MED25</b>     | 81857 mediator complex subunit 25                                                                        | -9.71  | 0.03 |
| 218438_s_at  | <b>MED28</b>     | 80306 mediator complex subunit 28                                                                        | 3.20   | 0.00 |
| 225641_at    | <b>MEF2D</b>     | 4209 myocyte enhancer factor 2D                                                                          | -2.15  | 0.34 |
| 212830_at    | <b>MEGF9</b>     | 1955 multiple EGF-like-domains 9                                                                         | -7.14  | 0.00 |
| 214077_x_at  | <b>MEIS3P1</b>   | 4213 Meis homeobox 3 pseudogene 1                                                                        | 3.55   | 0.13 |
| 224675_at    | <b>MESDC2</b>    | 23184 mesoderm development candidate 2                                                                   | 4.59   | 0.13 |
| 220839_at    | <b>METTL5</b>    | 29081 methyltransferase like 5                                                                           | 8.73   | 0.02 |
| 1553689_s_at | <b>METTL6</b>    | 131965 methyltransferase like 6                                                                          | 7.89   | 0.00 |
| 207761_s_at  | <b>METTL7A</b>   | 25840 methyltransferase like 7A                                                                          | -10.58 | 0.03 |
| 227055_at    | <b>METTL7B</b>   | 196410 methyltransferase like 7B                                                                         | 2.20   | 0.51 |
| 203406_at    | <b>MFAP1</b>     | 4236 microfibrillar-associated protein 1                                                                 | 2.69   | 0.02 |
| 243407_at    | <b>MFSD8</b>     | 256471 Major facilitator superfamily domain containing 8                                                 | 2.36   | 0.51 |
| 212945_s_at  | <b>MGA</b>       | 23269 MAX gene associated                                                                                | 5.46   | 0.00 |
| 206522_at    | <b>MGAM</b>      | 8972 maltase-glucoamylase (alpha-glucosidase)<br>mannosyl (alpha-1,3-)-glycoprotein beta-1,2-N-          | -11.95 | 0.00 |
| 201126_s_at  | <b>MGAT1</b>     | 4245 acetylglucosaminyltransferase<br>mannosyl (alpha-1,6-)-glycoprotein beta-1,2-N-                     | 3.17   | 0.00 |
| 211061_s_at  | <b>MGAT2</b>     | 4247 acetylglucosaminyltransferase<br>mannosyl (alpha-1,3-)-glycoprotein beta-1,4-N-                     | 2.96   | 0.51 |
| 226039_at    | <b>MGAT4A</b>    | 11320 acetylglucosaminyltransferase, isozyme A                                                           | -2.20  | 0.79 |
| 214696_at    | <b>MGC14376</b>  | 84981 hypothetical protein MGC14376<br>transcriptional adaptor 2 (ADA2 homolog, yeast)-                  | 3.23   | 0.25 |
| 236248_x_at  | <b>MGC21874</b>  | 93624 beta                                                                                               | -2.36  | 0.51 |
|              | <b>MGC31957</b>  | tumor necrosis factor receptor superfamily,<br>/// 254896 /// member 10c, decoy without an intracellular |        |      |
| 210484_s_at  | <b>TNFRSF10C</b> | 8794 domain /// hypothetical protein MGC31957                                                            | -52.17 | 0.00 |
| 220305_at    | <b>MGC3260</b>   | 78993 hypothetical protein MGC3260                                                                       | -4.15  | 0.13 |
| 226657_at    | <b>MGC33894</b>  | 256302 transcript expressed during hematopoiesis 2                                                       | -11.13 | 0.00 |
| 239186_at    | <b>MGC39372</b>  | 221756 hypothetical protein MGC39372                                                                     | 10.72  | 0.13 |
| 239104_at    | <b>MGC42157</b>  | 439933 hypothetical locus MGC42157                                                                       | 23.33  | 0.06 |
| 207775_at    | <b>MGC4859</b>   | 79150 hypothetical protein MGC4859 similar to HSPA8                                                      | 2.07   | 0.79 |
| 228283_at    | <b>MGC61571</b>  | 152100 hypothetical protein MGC61571                                                                     | 5.76   | 0.51 |
| 227983_at    | <b>MGC7036</b>   | 196383 hypothetical protein MGC7036                                                                      | 2.06   | 0.00 |
| 200899_s_at  | <b>MGEA5</b>     | 10724 meningioma expressed antigen 5 (hyaluronidase)                                                     | -2.74  | 0.00 |
| 211026_s_at  | <b>MGLL</b>      | 11343 monoglyceride lipase                                                                               | 15.40  | 0.00 |

|              |                 |                                                                                                                                         |         |      |
|--------------|-----------------|-----------------------------------------------------------------------------------------------------------------------------------------|---------|------|
| 1569057_s_at | <b>MIA3</b>     | 375056 melanoma inhibitory activity family, member 3                                                                                    | 2.17    | 0.79 |
| 224726_at    | <b>MIB1</b>     | 57534 mindbomb homolog 1 (Drosophila)<br>Microtubule associated monooxygenase, calponin                                                 | -3.54   | 0.34 |
| 236475_at    | <b>MICAL2</b>   | 9645 and LIM domain containing 2                                                                                                        | -20.57  | 0.00 |
| 206247_at    | <b>MICB</b>     | 4277 MHC class I polypeptide-related sequence B<br>MID1 interacting protein 1 (gastrulation specific                                    | 2.90    | 0.00 |
| 218251_at    | <b>MID1IP1</b>  | 58526 G12 homolog (zebrafish))                                                                                                          | -3.30   | 0.08 |
| 223411_at    | <b>MIF4GD</b>   | 57409 MIF4G domain containing                                                                                                           | 3.76    | 0.34 |
| 213188_s_at  | <b>MINA</b>     | 84864 MYC induced nuclear antigen<br>multiple inositol polyphosphate histidine                                                          | 2.20    | 0.34 |
| 209585_s_at  | <b>MINPP1</b>   | 9562 phosphatase, 1                                                                                                                     | 4.44    | 0.51 |
| 226214_at    | <b>MIR16</b>    | 51573 membrane interacting protein of RGS16<br>MIT, microtubule interacting and transport, domain                                       | -4.10   | 0.00 |
| 226329_s_at  | <b>MITD1</b>    | 129531 containing 1                                                                                                                     | 6.03    | 0.00 |
| 226066_at    | <b>MITF</b>     | 4286 microphthalmia-associated transcription factor<br>MKI67 (FHA domain) interacting nucleolar                                         | 4.97    | 0.13 |
| 224714_at    | <b>MKI67IP</b>  | 84365 phosphoprotein                                                                                                                    | 9.22    | 0.02 |
| 222530_s_at  | <b>MKKS</b>     | 8195 McKusick-Kaufman syndrome                                                                                                          | 4.47    | 0.34 |
| 215292_s_at  | <b>MKL1</b>     | 57591 megakaryoblastic leukemia (translocation) 1<br>muskelin 1, intracellular mediator containing kelch                                | -4.68   | 0.00 |
| 204423_at    | <b>MKLN1</b>    | 4289 motifs<br>mutL homolog 1, colon cancer, nonpolyposis type                                                                          | -3.45   | 0.51 |
| 202520_s_at  | <b>MLH1</b>     | 4292 2 (E. coli)<br>myeloid/lymphoid or mixed-lineage leukemia                                                                          | 4.54    | 0.25 |
| 220546_at    | <b>MLL</b>      | 4297 (trithorax homolog, Drosophila)<br>Myeloid/lymphoid or mixed-lineage leukemia<br>(trithorax homolog, Drosophila); translocated to, | -2.31   | 0.34 |
| 216480_x_at  | <b>MLLT10</b>   | 8028 10<br>myeloid/lymphoid or mixed-lineage leukemia                                                                                   | -2.17   | 0.00 |
| 224784_at    | <b>MLLT6</b>    | 4302 (trithorax homolog, Drosophila); translocated to, 6                                                                                | 8.32    | 0.08 |
| 239108_at    | <b>MLSTD1</b>   | 55711 Male sterility domain containing 1                                                                                                | -2.12   | 0.51 |
| 203434_s_at  | <b>MME</b>      | 4311 membrane metallo-endopeptidase                                                                                                     | -119.70 | 0.00 |
| 202828_s_at  | <b>MMP14</b>    | 4323 matrix metallopeptidase 14 (membrane-inserted)                                                                                     | 7.40    | 0.34 |
| 207289_at    | <b>MMP25</b>    | 64386 matrix metallopeptidase 25                                                                                                        | -5.97   | 0.00 |
| 204959_at    | <b>MNDA</b>     | 4332 myeloid cell nuclear differentiation antigen<br>MOB1, Mps One Binder kinase activator-like 2A                                      | -4.26   | 0.00 |
| 225530_at    | <b>MOBKL2A</b>  | 126308 (yeast)<br>MOB1, Mps One Binder kinase activator-like 2B                                                                         | -3.04   | 0.00 |
| 226844_at    | <b>MOBKL2B</b>  | 79817 (yeast)<br>MOB1, Mps One Binder kinase activator-like 2C                                                                          | 2.64    | 0.51 |
| 243052_at    | <b>MOBKL2C</b>  | 148932 (yeast)                                                                                                                          | 6.81    | 0.00 |
| 201994_at    | <b>MORF4L2</b>  | 9643 mortality factor 4 like 2<br>MOCO sulphurase C-terminal domain containing                                                          | 2.77    | 0.00 |
| 218865_at    | <b>MOSC1</b>    | 64757 1<br>Mov10, Moloney leukemia virus 10, homolog                                                                                    | -16.95  | 0.00 |
| 233917_s_at  | <b>MOV10</b>    | 4343 (mouse)                                                                                                                            | 6.01    | 0.06 |
| 226841_at    | <b>MPEG1</b>    | 219972 macrophage expressed gene 1                                                                                                      | -2.91   | 0.00 |
| 203740_at    | <b>MPHOSPH6</b> | 10200 M-phase phosphoprotein 6                                                                                                          | 5.49    | 0.06 |
| 203949_at    | <b>MPO</b>      | 4353 myeloperoxidase<br>membrane protein, palmitoylated 7 (MAGUK p55                                                                    | -3.63   | 0.03 |
| 1564308_a_at | <b>MPP7</b>     | 143098 subfamily member 7)                                                                                                              | -9.14   | 0.00 |
| 206764_x_at  | <b>MPPE1</b>    | 65258 metallophosphoesterase 1                                                                                                          | -11.66  | 0.00 |
| 210594_x_at  | <b>MPZL1</b>    | 9019 myelin protein zero-like 1                                                                                                         | -6.20   | 0.08 |
| 203780_at    | <b>MPZL2</b>    | 10205 myelin protein zero-like 2                                                                                                        | -6.63   | 0.08 |
| 227747_at    | <b>MPZL3</b>    | 196264 myelin protein zero-like 3                                                                                                       | -13.07  | 0.00 |
| 210224_at    | <b>MR1</b>      | 3140 major histocompatibility complex, class I-related                                                                                  | 6.32    | 0.00 |

|             |                 |                                                                                                                                                   |       |      |
|-------------|-----------------|---------------------------------------------------------------------------------------------------------------------------------------------------|-------|------|
| 225185_at   | <b>MRAS</b>     | 22808 muscle RAS oncogene homolog                                                                                                                 | 15.32 | 0.08 |
|             | <b>MRC1 ///</b> | 414308 /// mannose receptor, C type 1 /// mannose receptor,                                                                                       |       |      |
| 204438_at   | <b>MRCL1</b>    | 4360 C type 1-like 1                                                                                                                              | 51.73 | 0.06 |
| 212199_at   | <b>MRFAP1L1</b> | 114932 Morf4 family associated protein 1-like 1                                                                                                   | -2.98 | 0.07 |
| 1553293_at  | <b>MRGPRX3</b>  | 117195 MAS-related GPR, member X3                                                                                                                 | 2.44  | 0.16 |
| 225201_s_at | <b>MRPL14</b>   | 64928 mitochondrial ribosomal protein L14                                                                                                         | 10.24 | 0.00 |
| 218027_at   | <b>MRPL15</b>   | 29088 mitochondrial ribosomal protein L15                                                                                                         | 7.67  | 0.51 |
| 217907_at   | <b>MRPL18</b>   | 29074 mitochondrial ribosomal protein L18                                                                                                         | 2.83  | 0.13 |
| 225315_at   | <b>MRPL21</b>   | 219927 mitochondrial ribosomal protein L21                                                                                                        | 5.44  | 0.25 |
| 218339_at   | <b>MRPL22</b>   | 29093 mitochondrial ribosomal protein L22                                                                                                         | 2.48  | 0.79 |
| 218270_at   | <b>MRPL24</b>   | 79590 mitochondrial ribosomal protein L24                                                                                                         | 8.68  | 0.00 |
| 208787_at   | <b>MRPL3</b>    | 11222 mitochondrial ribosomal protein L3                                                                                                          | 6.70  | 0.34 |
| 225260_s_at | <b>MRPL32</b>   | 64983 mitochondrial ribosomal protein L32                                                                                                         | 12.63 | 0.00 |
| 218558_s_at | <b>MRPL39</b>   | 54148 mitochondrial ribosomal protein L39                                                                                                         | 4.29  | 0.13 |
| 201717_at   | <b>MRPL49</b>   | 740 mitochondrial ribosomal protein L49                                                                                                           | 2.43  | 0.34 |
| 225581_s_at | <b>MRPL50</b>   | 54534 mitochondrial ribosomal protein L50                                                                                                         | 13.31 | 0.06 |
| 224334_s_at | <b>MRPL51</b>   | 51258 mitochondrial ribosomal protein L51                                                                                                         | 2.76  | 0.00 |
| 225797_at   | <b>MRPL54</b>   | 116541 mitochondrial ribosomal protein L54                                                                                                        | 3.46  | 0.34 |
| 213840_s_at | <b>MRPS12</b>   | 6183 Mitochondrial ribosomal protein S12                                                                                                          | 4.93  | 0.51 |
| 217408_at   | <b>MRPS18B</b>  | 28973 mitochondrial ribosomal protein S18B                                                                                                        | 5.77  | 0.02 |
| 228019_s_at | <b>MRPS18C</b>  | 51023 mitochondrial ribosomal protein S18C                                                                                                        | 2.89  | 0.34 |
| 223156_at   | <b>MRPS23</b>   | 51649 mitochondrial ribosomal protein S23                                                                                                         | 3.67  | 0.16 |
| 224948_at   | <b>MRPS24</b>   | 64951 mitochondrial ribosomal protein S24                                                                                                         | 5.38  | 0.08 |
| 224873_s_at | <b>MRPS25</b>   | 64432 mitochondrial ribosomal protein S25                                                                                                         | -2.08 | 0.07 |
| 217932_at   | <b>MRPS7</b>    | 51081 mitochondrial ribosomal protein S7                                                                                                          | 5.17  | 0.34 |
| 225126_at   | <b>MRRF</b>     | 92399 mitochondrial ribosome recycling factor                                                                                                     | 6.02  | 0.79 |
| 235783_at   | <b>MRTO4</b>    | 51154 mRNA turnover 4 homolog ( <i>S. cerevisiae</i> )                                                                                            | 2.30  | 0.79 |
| 230214_at   | <b>MRVI1</b>    | 10335 murine retrovirus integration site 1 homolog<br>membrane-spanning 4-domains, subfamily A,                                                   | -4.24 | 0.25 |
| 219607_s_at | <b>MS4A4A</b>   | 51338 member 4<br>membrane-spanning 4-domains, subfamily A,                                                                                       | 12.41 | 0.06 |
| 219666_at   | <b>MS4A6A</b>   | 64231 member 6A<br>membrane-spanning 4-domains, subfamily A,                                                                                      | -8.23 | 0.03 |
| 223344_s_at | <b>MS4A7</b>    | 58475 member 7                                                                                                                                    | 4.56  | 0.13 |
| 202911_at   | <b>MSH6</b>     | 2956 mutS homolog 6 ( <i>E. coli</i> )                                                                                                            | -2.47 | 0.16 |
| 224765_at   | <b>MSL-1</b>    | 339287 male-specific lethal-1 homolog                                                                                                             | -2.15 | 0.00 |
| 211887_x_at | <b>MSR1</b>     | 4481 macrophage scavenger receptor 1                                                                                                              | 33.80 | 0.25 |
| 226720_at   | <b>MST101</b>   | 114825 MSTP101                                                                                                                                    | -3.85 | 0.08 |
| 223276_at   | <b>MST150</b>   | 85027 MSTP150                                                                                                                                     | -4.55 | 0.34 |
| 205556_at   | <b>MSX2</b>     | 4488 msh homeobox 2                                                                                                                               | 2.23  | 0.13 |
| 213629_x_at | <b>MT1F</b>     | 4494 metallothionein 1F                                                                                                                           | 2.62  | 0.51 |
|             | <b>MT1H ///</b> | 4496 /// metallothionein 1H /// metallothionein 1                                                                                                 |       |      |
| 206461_x_at | <b>MT1P2</b>    | 645745 pseudogene 2                                                                                                                               | 2.58  | 0.34 |
| 204326_x_at | <b>MT1X</b>     | 4501 metallothionein 1X                                                                                                                           | 4.29  | 0.51 |
| 212185_x_at | <b>MT2A</b>     | 4502 metallothionein 2A                                                                                                                           | 9.90  | 0.06 |
| 217772_s_at | <b>MTCH2</b>    | 23788 mitochondrial carrier homolog 2 ( <i>C. elegans</i> )                                                                                       | 4.77  | 0.00 |
| 212250_at   | <b>MTDH</b>     | 92140 metadherin                                                                                                                                  | 4.81  | 0.00 |
| 227150_at   | <b>MTF1</b>     | 4520 metal-regulatory transcription factor 1                                                                                                      | 2.97  | 0.06 |
| 235689_at   | <b>MTFMT</b>    | 123263 mitochondrial methionyl-tRNA formyltransferase<br>methylenetetrahydrofolate dehydrogenase<br>(NADP+ dependent) 2, methenyltetrahydrofolate | -7.06 | 0.51 |
| 201761_at   | <b>MTHFD2</b>   | 10797 cyclohydrolase<br>methylenetetrahydrofolate dehydrogenase                                                                                   | 16.97 | 0.00 |
| 238762_at   | <b>MTHFD2L</b>  | 441024 (NADP+ dependent) 2-like<br>5,10-methenyltetrahydrofolate synthetase (5-                                                                   | 8.17  | 0.08 |
| 203433_at   | <b>MTHFS</b>    | 10588 formyltetrahydrofolate cyclo-ligase)                                                                                                        | -2.05 | 0.07 |

|              |                  |                                                                                                        |        |      |
|--------------|------------------|--------------------------------------------------------------------------------------------------------|--------|------|
| 203095_at    | <b>MTIF2</b>     | 4528 mitochondrial translational initiation factor 2                                                   | 2.91   | 0.79 |
| 36920_at     | <b>MTM1</b>      | 4534 myotubularin 1                                                                                    | -6.62  | 0.00 |
| 225810_at    | <b>MTMR10</b>    | 54893 myotubularin related protein 10                                                                  | -3.29  | 0.00 |
| 203211_s_at  | <b>MTMR2</b>     | 8898 myotubularin related protein 2<br>myxovirus (influenza virus) resistance 1, interferon-           | 2.92   | 0.00 |
| 202086_at    | <b>MX1</b>       | 4599 inducible protein p78 (mouse)                                                                     | 2.17   | 0.51 |
| 210778_s_at  | <b>MXD4</b>      | 10608 MAX dimerization protein 4                                                                       | -2.47  | 0.03 |
| 202364_at    | <b>MXI1</b>      | 4601 MAX interactor 1<br>v-myb myeloblastosis viral oncogene homolog                                   | -6.41  | 0.25 |
| 204798_at    | <b>MYB</b>       | 4602 (avian)                                                                                           | -3.99  | 0.34 |
| 203359_s_at  | <b>MYCBP</b>     | 26292 c-myc binding protein                                                                            | -2.83  | 0.08 |
| 201495_x_at  | <b>MYH11</b>     | 4629 myosin, heavy chain 11, smooth muscle                                                             | -4.25  | 0.00 |
| 244654_at    | <b>MYO1G</b>     | 64005 myosin IG                                                                                        | -2.70  | 0.51 |
| 227761_at    | <b>MYO5A</b>     | 4644 myosin VA (heavy chain 12, myoxin)                                                                | -5.27  | 0.07 |
| 225299_at    | <b>MYO5B</b>     | 4645 myosin VB<br>MYST histone acetyltransferase (monocytic                                            | 2.17   | 0.08 |
| 226547_at    | <b>MYST3</b>     | 7994 leukemia) 3                                                                                       | -2.54  | 0.07 |
| 32069_at     | <b>N4BP1</b>     | 9683 Nedd4 binding protein 1<br>NGFI-A binding protein 1 (EGR1 binding protein                         | 2.08   | 0.02 |
| 209272_at    | <b>NAB1</b>      | 4664 1)                                                                                                | 2.57   | 0.16 |
| 202943_s_at  | <b>NAGA</b>      | 4668 N-acetylgalactosaminidase, alpha-                                                                 | 5.01   | 0.51 |
|              | <b>NAIP ///</b>  | 4671 ///<br>NLR family, apoptosis inhibitory protein ///                                               |        |      |
| 204860_s_at  | <b>NAIP1B</b>    | 728519 neuronal apoptosis inhibitory protein (centromeric)                                             | -6.70  | 0.00 |
| 228073_at    | <b>NANP</b>      | 140838 N-acetylneuraminic acid phosphatase<br>N-acetylneuraminic acid synthase (sialic acid            | 2.20   | 0.34 |
| 218189_s_at  | <b>NANS</b>      | 54187 synthase)                                                                                        | 2.34   | 0.51 |
| 228063_s_at  | <b>NAP1L5</b>    | 266812 nucleosome assembly protein 1-like 5<br>N-ethylmaleimide-sensitive factor attachment            | -6.42  | 0.16 |
| 206491_s_at  | <b>NAPA</b>      | 8775 protein, alpha                                                                                    | 3.67   | 0.08 |
| 219862_s_at  | <b>NARF</b>      | 26502 nuclear prelamin A recognition factor                                                            | -6.41  | 0.00 |
| 219158_s_at  | <b>NARG1</b>     | 80155 NMDA receptor regulated 1                                                                        | 22.17  | 0.25 |
| 200027_at    | <b>NARS</b>      | 4677 asparaginyl-tRNA synthetase                                                                       | 9.10   | 0.00 |
| 217884_at    | <b>NAT10</b>     | 55226 N-acetyltransferase 10                                                                           | 5.17   | 0.34 |
| 1552658_a_at | <b>NAV3</b>      | 89795 neuron navigator 3                                                                               | 4.08   | 0.06 |
| 217299_s_at  | <b>NBN</b>       | 4683 nibrin                                                                                            | 9.95   | 0.00 |
| 201521_s_at  | <b>NCBP2</b>     | 22916 nuclear cap binding protein subunit 2, 20kDa                                                     | 24.46  | 0.00 |
|              | <b>NCF1 ///</b>  | 653361 ///<br>neutrophil cytosolic factor 1, (chronic                                                  |        |      |
|              | <b>NCF1B ///</b> | 654816 ///<br>granulomatous disease, autosomal 1) ///<br>neutrophil cytosolic factor 1B pseudogene /// |        |      |
| 204961_s_at  | <b>NCF1C</b>     | 654817 neutrophil cytosolic factor 1C pseudogene                                                       | -2.47  | 0.13 |
| 205147_x_at  | <b>NCF4</b>      | 4689 neutrophil cytosolic factor 4, 40kDa                                                              | -2.38  | 0.00 |
| 200610_s_at  | <b>NCL</b>       | 4691 nucleolin                                                                                         | 3.40   | 0.00 |
| 215857_at    | <b>NCLN</b>      | 56926 nicalin homolog (zebrafish)                                                                      | -19.55 | 0.00 |
| 209106_at    | <b>NCOA1</b>     | 8648 nuclear receptor coactivator 1                                                                    | -3.08  | 0.25 |
| 205731_s_at  | <b>NCOA2</b>     | 10499 nuclear receptor coactivator 2                                                                   | -3.70  | 0.07 |
| 225145_at    | <b>NCOA5</b>     | 57727 nuclear receptor coactivator 5                                                                   | 2.83   | 0.08 |
| 225344_at    | <b>NCOA7</b>     | 135112 nuclear receptor coactivator 7<br>nudE nuclear distribution gene E homolog 1 (A.                | 15.06  | 0.00 |
| 218414_s_at  | <b>NDE1</b>      | 54820 nidulans)<br>nudE nuclear distribution gene E homolog (A.                                        | -4.66  | 0.13 |
| 208093_s_at  | <b>NDEL1</b>     | 81565 nidulans)-like 1                                                                                 | -3.85  | 0.00 |
| 228355_s_at  | <b>NDUFA12L</b>  | 91942 NDUFA12-like<br>NADH dehydrogenase (ubiquinone) 1 alpha                                          | 2.04   | 0.00 |
| 208969_at    | <b>NDUFA9</b>    | 4704 subcomplex, 9, 39kDa<br>NADH dehydrogenase (ubiquinone) 1, alpha/beta                             | 5.87   | 0.02 |
| 202077_at    | <b>NDUFAB1</b>   | 4706 subcomplex, 1, 8kDa                                                                               | 4.21   | 0.06 |



|             |                 |                                                                                                     |        |      |
|-------------|-----------------|-----------------------------------------------------------------------------------------------------|--------|------|
| 218201_at   | <b>NDUFB2</b>   | NADH dehydrogenase (ubiquinone) 1 beta subcomplex, 2, 8kDa                                          | 3.83   | 0.16 |
| 203613_s_at | <b>NDUFB6</b>   | NADH dehydrogenase (ubiquinone) 1 beta subcomplex, 6, 17kDa                                         | -2.46  | 0.00 |
| 201227_s_at | <b>NDUFB8</b>   | NADH dehydrogenase (ubiquinone) 1 beta subcomplex, 8, 19kDa                                         | 2.03   | 0.16 |
| 222992_s_at | <b>NDUFB9</b>   | NADH dehydrogenase (ubiquinone) 1 beta subcomplex, 9, 22kDa                                         | 4.96   | 0.06 |
| 203478_at   | <b>NDUFC1</b>   | NADH dehydrogenase (ubiquinone) 1, subcomplex unknown, 1, 6kDa                                      | 2.56   | 0.79 |
| 202941_at   | <b>NDUFV2</b>   | NADH dehydrogenase (ubiquinone) flavoprotein 2, 24kDa                                               | 5.78   | 0.00 |
| 226616_s_at | <b>NDUFV3</b>   | NADH dehydrogenase (ubiquinone) flavoprotein 3, 10kDa                                               | 4.78   | 0.08 |
| 209300_s_at | <b>NECAP1</b>   | 25977 NECAP endocytosis associated 1                                                                | 4.88   | 0.00 |
| 220731_s_at | <b>NECAP2</b>   | 55707 NECAP endocytosis associated 2                                                                | 3.00   | 0.00 |
| 237761_at   | <b>NEK6</b>     | 10783 NIMA (never in mitosis gene a)-related kinase 6                                               | 3.15   | 0.13 |
| 212530_at   | <b>NEK7</b>     | 140609 NIMA (never in mitosis gene a)-related kinase 7                                              | -3.12  | 0.00 |
| 201829_at   | <b>NET1</b>     | 10276 neuroepithelial cell transforming gene 1                                                      | 2.35   | 0.51 |
| 218888_s_at | <b>NETO2</b>    | 81831 neuropilin (NRP) and tolloid (TLL)-like 2                                                     | 3.38   | 0.13 |
| 208926_at   | <b>NEU1</b>     | 4758 sialidase 1 (lysosomal sialidase)                                                              | 2.65   | 0.25 |
| 224984_at   | <b>NFAT5</b>    | 10725 nuclear factor of activated T-cells 5, tonicity-responsive                                    | 2.05   | 0.34 |
| 212809_at   | <b>NFATC2IP</b> | 84901 nuclear factor of activated T-cells, cytoplasmic, calcineurin-dependent 2 interacting protein | 2.54   | 0.16 |
| 209930_s_at | <b>NFE2</b>     | 4778 nuclear factor (erythroid-derived 2), 45kDa                                                    | -10.65 | 0.00 |
| 201146_at   | <b>NFE2L2</b>   | 4780 nuclear factor (erythroid-derived 2)-like 2                                                    | 3.42   | 0.00 |
| 204702_s_at | <b>NFE2L3</b>   | 9603 nuclear factor (erythroid-derived 2)-like 3                                                    | 2.80   | 0.08 |
| 1560527_at  | <b>NF-E4</b>    | 58160 nuclear factor of kappa light polypeptide gene transcription factor NF-E4                     | -2.97  | 0.00 |
| 209239_at   | <b>NFKB1</b>    | 4790 nuclear factor of kappa light polypeptide gene enhancer in B-cells 1 (p105)                    | 3.49   | 0.34 |
| 209636_at   | <b>NFKB2</b>    | 4791 nuclear factor of kappa light polypeptide gene enhancer in B-cells 2 (p49/p100)                | 3.89   | 0.08 |
| 231699_at   | <b>NFKBIA</b>   | 4792 nuclear factor of kappa light polypeptide gene enhancer in B-cells inhibitor, alpha            | 7.12   | 0.00 |
| 214062_x_at | <b>NFKBIB</b>   | 4793 nuclear factor of kappa light polypeptide gene enhancer in B-cells inhibitor, beta             | 2.67   | 0.00 |
| 203927_at   | <b>NFKBIE</b>   | 4794 nuclear factor of kappa light polypeptide gene enhancer in B-cells inhibitor, epsilon          | 7.32   | 0.00 |
| 1553103_at  | <b>NFX1</b>     | 4799 nuclear transcription factor, X-box binding 1                                                  | 5.60   | 0.08 |
| 227220_at   | <b>NFXL1</b>    | 152518 nuclear transcription factor, X-box binding-like 1                                           | -5.26  | 0.03 |
| 218129_s_at | <b>NFYB</b>     | 4801 nuclear transcription factor Y, beta                                                           | -2.11  | 0.08 |
| 213794_s_at | <b>NGDN</b>     | 25983 neuroguidin, EIF4E binding protein                                                            | 3.17   | 0.08 |
| 217722_s_at | <b>NGRN</b>     | 51335 neugrin, neurite outgrowth associated                                                         | 2.14   | 0.25 |
| 201077_s_at | <b>NHP2L1</b>   | 4809 NHP2 non-histone chromosome protein 2-like 1 (S. cerevisiae)                                   | 5.62   | 0.06 |
| 242800_at   | <b>NHS</b>      | 4810 Nance-Horan syndrome (congenital cataracts and dental anomalies)                               | -14.84 | 0.34 |
| 225921_at   | <b>NIN</b>      | 51199 ninein (GSK3B interacting protein)                                                            | -3.26  | 0.00 |
| 203045_at   | <b>NINJ1</b>    | 4814 ninjurin 1                                                                                     | 2.35   | 0.02 |
| 219594_at   | <b>NINJ2</b>    | 4815 ninjurin 2                                                                                     | -3.92  | 0.13 |
| 212469_at   | <b>NIPBL</b>    | 25836 Nipped-B homolog (Drosophila)                                                                 | -2.15  | 0.34 |
| 201708_s_at | <b>NIPSNAP1</b> | 8508 nipsnap homolog 1 (C. elegans)                                                                 | -6.74  | 0.25 |
| 225930_at   | <b>NKIRAS1</b>  | 28512 NFKB inhibitor interacting Ras-like 1                                                         | 17.64  | 0.00 |
| 205893_at   | <b>NLGN1</b>    | 22871 neuroligin 1                                                                                  | -3.04  | 0.34 |
| 225943_at   | <b>NLN</b>      | 57486 neurolysin (metallopeptidase M3 family)                                                       | 12.74  | 0.16 |

|              |                                        |                                                                                                                                           |        |      |
|--------------|----------------------------------------|-------------------------------------------------------------------------------------------------------------------------------------------|--------|------|
| 1552553_a_at | <b>NLRC4</b>                           | 58484 NLR family, CARD domain containing 4                                                                                                | -2.17  | 0.07 |
| 226474_at    | <b>NLRC5</b>                           | 84166 NLR family, CARD domain containing 5                                                                                                | 2.73   | 0.00 |
| 210113_s_at  | <b>NLRP1</b>                           | 22861 NLR family, pyrin domain containing 1                                                                                               | -14.22 | 0.00 |
| 1552531_a_at | <b>NLRP11</b>                          | 204801 NLR family, pyrin domain containing 11                                                                                             | 2.29   | 0.25 |
| 1554952_s_at | <b>NLRP12</b>                          | 91662 NLR family, pyrin domain containing 12                                                                                              | -11.93 | 0.03 |
| 222497_x_at  | <b>NMD3</b>                            | 51068 NMD3 homolog (S. cerevisiae)<br>non-metastatic cells 1, protein (NM23A)                                                             | 3.97   | 0.06 |
| 201577_at    | <b>NME1</b>                            | 4830 expressed in                                                                                                                         | 15.01  | 0.02 |
| 201268_at    | <b>NME1-NME2</b><br>///<br><b>NME2</b> | 4831 ///<br>654364 non-metastatic cells 2, protein (NM23B)<br>expressed in ///<br>NM23-LV<br>non-metastatic cells 7, protein expressed in | 6.47   | 0.25 |
| 227556_at    | <b>NME7</b>                            | 29922 (nucleoside-diphosphate kinase)                                                                                                     | 15.30  | 0.06 |
| 222684_s_at  | <b>NOL10</b>                           | 79954 nucleolar protein 10                                                                                                                | 5.62   | 0.06 |
| 221970_s_at  | <b>NOL11</b>                           | 25926 nucleolar protein 11                                                                                                                | 3.10   | 0.25 |
| 200875_s_at  | <b>NOL5A</b>                           | 10528 nucleolar protein 5A (56kDa with KKE/D repeat)                                                                                      | 3.22   | 0.13 |
| 210097_s_at  | <b>NOL7</b>                            | 51406 nucleolar protein 7, 27kDa                                                                                                          | 4.18   | 0.00 |
| 218244_at    | <b>NOL8</b>                            | 55035 nucleolar protein 8<br>nucleolar protein family A, member 1 (H/ACA                                                                  | 3.18   | 0.25 |
| 219110_at    | <b>NOLA1</b>                           | 54433 small nucleolar RNPs)                                                                                                               | 4.16   | 0.06 |
| 205895_s_at  | <b>NOLC1</b>                           | 9221 nucleolar and coiled-body phosphoprotein 1                                                                                           | 3.69   | 0.51 |
| 210470_x_at  | <b>NONO</b>                            | 4841 non-POU domain containing, octamer-binding                                                                                           | 2.00   | 0.51 |
| 223096_at    | <b>NOP5/NOP5</b><br><b>8</b>           | 51602 nucleolar protein NOP5/NOP58<br>Notch homolog 1, translocation-associated                                                           | 7.77   | 0.02 |
| 223508_at    | <b>NOTCH1</b>                          | 4851 (Drosophila)                                                                                                                         | -3.06  | 0.07 |
| 204501_at    | <b>NOV</b>                             | 4856 nephroblastoma overexpressed gene                                                                                                    | -3.84  | 0.16 |
| 201695_s_at  | <b>NP</b>                              | 4860 nucleoside phosphorylase                                                                                                             | 5.73   | 0.13 |
| 202679_at    | <b>NPC1</b>                            | 4864 Niemann-Pick disease, type C1                                                                                                        | 3.40   | 0.16 |
| 200701_at    | <b>NPC2</b>                            | 10577 Niemann-Pick disease, type C2                                                                                                       | 2.31   | 0.00 |
| 89476_r_at   | <b>NPEPL1</b>                          | 79716 aminopeptidase-like 1                                                                                                               | -2.19  | 0.07 |
| 201455_s_at  | <b>NPEPPS</b>                          | 9520 aminopeptidase puromycin sensitive                                                                                                   | -3.82  | 0.07 |
| 213471_at    | <b>NPHP4</b>                           | 261734 nephronophthisis 4<br>nucleophosmin (nucleolar phosphoprotein B23,                                                                 | 2.42   | 0.34 |
| 221691_x_at  | <b>NPM1</b>                            | 4869 numatrin)<br>thyroid hormone receptor, alpha (erythroblastic<br>leukemia viral (v-erb-a) oncogene homolog, avian)                    | 2.42   | 0.00 |
| 31637_s_at   | <b>NR1D1</b> ///<br><b>THRA</b>        | 7067 ///<br>9572 ///<br>1 nuclear receptor subfamily 1, group D, member                                                                   | 2.99   | 0.34 |
| 225477_s_at  | <b>NR2C2</b>                           | 7182 nuclear receptor subfamily 2, group C, member 2                                                                                      | -3.28  | 0.07 |
| 207978_s_at  | <b>NR4A3</b>                           | 8013 nuclear receptor subfamily 4, group A, member 3<br>neuroblastoma RAS viral (v-ras) oncogene                                          | 2.17   | 0.25 |
| 202647_s_at  | <b>NRAS</b>                            | 4893 homolog                                                                                                                              | 3.17   | 0.00 |
| 221803_s_at  | <b>NRBF2</b>                           | 29982 nuclear receptor binding factor 2                                                                                                   | -2.82  | 0.03 |
| 202599_s_at  | <b>NRIP1</b>                           | 8204 nuclear receptor interacting protein 1                                                                                               | 8.11   | 0.08 |
| 218625_at    | <b>NRN1</b>                            | 51299 neuritin 1                                                                                                                          | 2.73   | 0.51 |
| 228102_at    | <b>NRP2</b>                            | 8828 Neuropilin 2                                                                                                                         | 2.29   | 0.51 |
| 1553943_at   | <b>NS3BP</b>                           | 171391 NS3BP                                                                                                                              | 2.00   | 0.51 |
| 220248_x_at  | <b>NSFL1C</b>                          | 55968 NSFL1 (p97) cofactor (p47)<br>neutral sphingomyelinase (N-SMase) activation                                                         | -2.09  | 0.03 |
| 232149_s_at  | <b>NSMAF</b>                           | 8439 associated factor<br>non-SMC element 2, MMS21 homolog (S.                                                                            | 2.01   | 0.06 |
| 226536_at    | <b>NSMCE2</b>                          | 286053 cerevisiae)                                                                                                                        | 5.62   | 0.02 |
| 223076_s_at  | <b>NSUN2</b>                           | 54888 NOL1/NOP2/Sun domain family, member 2                                                                                               | 2.95   | 0.00 |
| 230200_at    | <b>NSUN6</b>                           | 221078 NOL1/NOP2/Sun domain family, member 6                                                                                              | 5.08   | 0.06 |

|             |                                                          |                                                                                                                                                |       |      |
|-------------|----------------------------------------------------------|------------------------------------------------------------------------------------------------------------------------------------------------|-------|------|
| 223298_s_at | <b>NT5C3</b>                                             | 51251 5'-nucleotidase, cytosolic III                                                                                                           | -2.57 | 0.16 |
| 223178_s_at | <b>NT5DC1</b>                                            | 221294 5'-nucleotidase domain containing 1                                                                                                     | -3.00 | 0.25 |
| 233072_at   | <b>NTNG2</b>                                             | 84628 netrin G2                                                                                                                                | -9.58 | 0.00 |
| 234332_at   | <b>NUB1</b>                                              | 51667 negative regulator of ubiquitin-like proteins 1<br>nucleotide binding protein 1 (MinD homolog, E. coli)                                  | 2.04  | 0.02 |
| 203978_at   | <b>NUBP1</b>                                             | 4682 nuclear casein kinase and cyclin-dependent                                                                                                | 5.79  | 0.06 |
| 229353_s_at | <b>NUCKS1</b>                                            | 64710 kinase substrate 1                                                                                                                       | 2.36  | 0.25 |
| 225439_at   | <b>NUDCD1</b>                                            | 84955 NudC domain containing 1                                                                                                                 | 4.58  | 0.51 |
| 201270_x_at | <b>NUDCD3</b>                                            | 23386 NudC domain containing 3<br>nudix (nucleoside diphosphate linked moiety X)-                                                              | 2.60  | 0.34 |
| 219347_at   | <b>NUDT15</b>                                            | 55270 type motif 15<br>nudix (nucleoside diphosphate linked moiety X)-                                                                         | 6.19  | 0.13 |
| 235002_at   | <b>NUDT16</b>                                            | 131870 type motif 16<br>nudix (nucleoside diphosphate linked moiety X)-                                                                        | -3.19 | 0.13 |
| 224477_s_at | <b>NUDT16L1</b>                                          | 84309 type motif 16-like 1<br>nudix (nucleoside diphosphate linked moiety X)-                                                                  | -3.11 | 0.79 |
| 212181_s_at | <b>NUDT4</b>                                             | 11163 type motif 4<br>nudix (nucleoside diphosphate linked moiety X)-                                                                          | -2.51 | 0.25 |
| 223100_s_at | <b>NUDT5</b>                                             | 11164 type motif 5<br>nudix (nucleoside diphosphate linked moiety X)-                                                                          | -3.65 | 0.08 |
| 218375_at   | <b>NUDT9</b>                                             | 53343 type motif 9                                                                                                                             | 3.26  | 0.00 |
| 235539_at   | <b>NUMA1</b>                                             | 4926 Nuclear mitotic apparatus protein 1                                                                                                       | 7.52  | 0.25 |
| 209073_s_at | <b>NUMB</b>                                              | 8650 numb homolog (Drosophila)                                                                                                                 | -2.10 | 0.00 |
| 212315_s_at | <b>NUP210</b>                                            | 23225 nucleoporin 210kDa                                                                                                                       | -2.09 | 0.07 |
| 202155_s_at | <b>NUP214</b>                                            | 8021 nucleoporin 214kDa                                                                                                                        | -4.68 | 0.00 |
| 213682_at   | <b>NUP50</b>                                             | 10762 nucleoporin 50kDa                                                                                                                        | -2.58 | 0.03 |
| 202153_s_at | <b>NUP62</b>                                             | 23636 nucleoporin 62kDa                                                                                                                        | 8.64  | 0.00 |
| 202188_at   | <b>NUP93</b>                                             | 9688 nucleoporin 93kDa                                                                                                                         | 2.81  | 0.34 |
| 204435_at   | <b>NUPL1</b>                                             | 9818 nucleoporin like 1<br>nuclear undecaprenyl pyrophosphate synthase 1                                                                       | 2.56  | 0.34 |
| 225071_at   | <b>NUS1</b>                                              | 116150 homolog (S. cerevisiae)                                                                                                                 | 5.09  | 0.00 |
| 202397_at   | <b>NUTF2</b>                                             | 10204 nuclear transport factor 2                                                                                                               | 2.84  | 0.02 |
| 218708_at   | <b>NXT1</b>                                              | 29107 NTF2-like export factor 1                                                                                                                | 14.09 | 0.00 |
| 209628_at   | <b>NXT2</b>                                              | 55916 nuclear transport factor 2-like export factor 2                                                                                          | 4.99  | 0.16 |
| 205552_s_at | <b>OAS1</b>                                              | 4938 2',5'-oligoadenylate synthetase 1, 40/46kDa                                                                                               | 11.46 | 0.00 |
| 204972_at   | <b>OAS2</b>                                              | 4939 2'-5'-oligoadenylate synthetase 2, 69/71kDa                                                                                               | 6.32  | 0.00 |
| 218400_at   | <b>OAS3</b>                                              | 4940 2'-5'-oligoadenylate synthetase 3, 100kDa                                                                                                 | 5.50  | 0.00 |
| 201599_at   | <b>OAT</b>                                               | 4942 ornithine aminotransferase (gyrate atrophy)                                                                                               | -3.49 | 0.34 |
| 215952_s_at | <b>OAZ1</b>                                              | 4946 ornithine decarboxylase antizyme 1                                                                                                        | -2.61 | 0.08 |
| 201365_at   | <b>OAZ2</b>                                              | 4947 ornithine decarboxylase antizyme 2                                                                                                        | -3.63 | 0.00 |
| 220848_x_at | <b>OBP2A</b>                                             | 29991 odorant binding protein 2A                                                                                                               | 2.72  | 0.79 |
| 200790_at   | <b>ODC1</b>                                              | 4953 ornithine decarboxylase 1                                                                                                                 | 2.82  | 0.25 |
| 219582_at   | <b>OGFRL1</b>                                            | 79627 opioid growth factor receptor-like 1<br>O-linked N-acetylglucosamine (GlcNAc)<br>transferase (UDP-N-<br>acetylglucosamine:polypeptide-N- | -2.26 | 0.00 |
| 229787_s_at | <b>OGT</b>                                               | 8473 acetylglucosaminyl transferase)                                                                                                           | -4.60 | 0.07 |
| 219293_s_at | <b>OLA1</b>                                              | 29789 Obg-like ATPase 1                                                                                                                        | 2.50  | 0.79 |
|             | <b>olfactory receptor, family 7, subfamily E, member</b> | ---                                                                                                                                            |       |      |
| 232586_x_at |                                                          | CDNA FLJ11504 fis, clone HEMBA1002119                                                                                                          | 4.61  | 0.79 |
| 228170_at   | <b>OLIG1</b>                                             | 116448 oligodendrocyte transcription factor 1<br>oxidized low density lipoprotein (lectin-like)                                                | -6.36 | 0.25 |
| 210004_at   | <b>OLR1</b>                                              | 4973 receptor 1                                                                                                                                | 19.37 | 0.02 |
| 202074_s_at | <b>OPTN</b>                                              | 10133 optineurin                                                                                                                               | 2.51  | 0.34 |

|             |                 |                                                                       |        |      |
|-------------|-----------------|-----------------------------------------------------------------------|--------|------|
| 217499_x_at | <b>OR7E37P</b>  | 26636 olfactory receptor, family 7, subfamily E, member 37 pseudogene | 3.21   | 0.79 |
| 221864_at   | <b>ORAI3</b>    | 93129 ORAI calcium release-activated calcium modulator 3              | -2.40  | 0.51 |
| 203352_at   | <b>ORC4L</b>    | 5000 origin recognition complex, subunit 4-like (yeast)               | 2.14   | 0.25 |
| 205040_at   | <b>ORM1</b>     | 5004 orosomuroid 1                                                    | 3.38   | 0.13 |
|             | <b>ORM1 ///</b> | 5004 ///                                                              |        |      |
| 205041_s_at | <b>ORM2</b>     | 5005 orosomuroid 1 /// orosomuroid 2                                  | 2.93   | 0.34 |
| 201800_s_at | <b>OSBP</b>     | 5007 oxysterol binding protein                                        | 2.31   | 0.34 |
| 229527_s_at | <b>OSBPL11</b>  | 114885 Oxysterol binding protein-like 11                              | -2.12  | 0.00 |
| 209485_s_at | <b>OSBPL1A</b>  | 114876 oxysterol binding protein-like 1A                              | -2.76  | 0.79 |
| 209221_s_at | <b>OSBPL2</b>   | 9885 oxysterol binding protein-like 2                                 | -2.47  | 0.51 |
| 218047_at   | <b>OSBPL9</b>   | 114883 oxysterol binding protein-like 9                               | -3.66  | 0.79 |
| 219475_at   | <b>OSGIN1</b>   | 29948 oxidative stress induced growth inhibitor 1                     | 4.08   | 0.00 |
| 230170_at   | <b>OSM</b>      | 5008 oncostatin M                                                     | 6.66   | 0.00 |
|             |                 | osteopetrosis associated transmembrane protein                        |        |      |
| 218196_at   | <b>OSTM1</b>    | 28962 1                                                               | 3.91   | 0.00 |
| 203480_s_at | <b>OTUD4</b>    | 54726 OTU domain containing 4                                         | 5.61   | 0.06 |
| 224745_x_at | <b>OTUD5</b>    | 55593 OTU domain containing 5                                         | -2.42  | 0.25 |
| 223879_s_at | <b>OXR1</b>     | 55074 oxidation resistance 1                                          | -2.78  | 0.16 |
|             |                 | purinergic receptor P2X, ligand-gated ion channel,                    |        |      |
| 204088_at   | <b>P2RX4</b>    | 5025 4                                                                | 22.75  | 0.00 |
|             |                 | purinergic receptor P2X, ligand-gated ion channel,                    |        |      |
| 207091_at   | <b>P2RX7</b>    | 5027 7                                                                | 4.40   | 0.08 |
| 214615_at   | <b>P2RY10</b>   | 27334 purinergic receptor P2Y, G-protein coupled, 10                  | -5.31  | 0.07 |
| 220005_at   | <b>P2RY13</b>   | 53829 purinergic receptor P2Y, G-protein coupled, 13                  | -2.37  | 0.00 |
| 206637_at   | <b>P2RY14</b>   | 9934 purinergic receptor P2Y, G-protein coupled, 14                   | 5.42   | 0.00 |
| 206277_at   | <b>P2RY2</b>    | 5029 purinergic receptor P2Y, G-protein coupled, 2                    | 5.23   | 0.00 |
| 229686_at   | <b>P2RY8</b>    | 286530 purinergic receptor P2Y, G-protein coupled, 8                  | -3.48  | 0.07 |
|             |                 | procollagen-proline, 2-oxoglutarate 4-dioxygenase                     |        |      |
| 207543_s_at | <b>P4HA1</b>    | 5033 (proline 4-hydroxylase), alpha polypeptide I                     | 5.24   | 0.00 |
|             |                 | procollagen-proline, 2-oxoglutarate 4-dioxygenase                     |        |      |
| 202733_at   | <b>P4HA2</b>    | 8974 (proline 4-hydroxylase), alpha polypeptide II                    | 2.39   | 0.34 |
|             |                 | procollagen-proline, 2-oxoglutarate 4-dioxygenase                     |        |      |
| 200654_at   | <b>P4HB</b>     | 5034 (proline 4-hydroxylase), beta polypeptide                        | 2.90   | 0.16 |
| 208676_s_at | <b>PA2G4</b>    | 5036 proliferation-associated 2G4, 38kDa                              | 4.42   | 0.06 |
| 224658_x_at | <b>PACS1</b>    | 55690 phosphofurin acidic cluster sorting protein 1                   | -8.55  | 0.08 |
|             |                 | protein kinase C and casein kinase substrate in                       |        |      |
| 227053_at   | <b>PACSIN1</b>  | 29993 neurons 1                                                       | -2.12  | 0.25 |
|             |                 | protein kinase C and casein kinase substrate in                       |        |      |
| 201651_s_at | <b>PACSIN2</b>  | 11252 neurons 2                                                       | -4.55  | 0.03 |
| 220001_at   | <b>PADI4</b>    | 23569 peptidyl arginine deiminase, type IV                            | -34.82 | 0.00 |
|             |                 | phosphoprotein associated with glycosphingolipid                      |        |      |
| 225622_at   | <b>PAG1</b>     | 55824 microdomains 1                                                  | 3.99   | 0.00 |
| 206897_at   | <b>PAGE1</b>    | 8712 P antigen family, member 1 (prostate associated)                 | 2.05   | 0.16 |
| 222983_s_at | <b>PAIP2</b>    | 51247 poly(A) binding protein interacting protein 2                   | -2.07  | 0.00 |
|             |                 | p21/Cdc42/Rac1-activated kinase 1 (STE20                              |        |      |
| 226507_at   | <b>PAK1</b>     | 5058 homolog, yeast)                                                  | -2.74  | 0.03 |
| 218886_at   | <b>PAK1IP1</b>  | 55003 PAK1 interacting protein 1                                      | 8.00   | 0.25 |
| 1557535_at  | <b>PALLD</b>    | 23022 Palladin, cytoskeletal associated protein                       | 2.98   | 0.08 |
| 202336_s_at | <b>PAM</b>      | 5066 peptidylglycine alpha-amidating monooxygenase                    | -5.15  | 0.25 |
|             |                 | PAN3 polyA specific ribonuclease subunit                              |        |      |
| 225563_at   | <b>PAN3</b>     | 255967 homolog ( <i>S. cerevisiae</i> )                               | -2.46  | 0.00 |

|              |                 |                                                                                                                          |        |      |
|--------------|-----------------|--------------------------------------------------------------------------------------------------------------------------|--------|------|
| 244471_x_at  | <b>PANX2</b>    | 56666 Pannexin 2                                                                                                         | -2.60  | 0.00 |
| 229043_at    | <b>PAPD5</b>    | 64282 PAP associated domain containing 5                                                                                 | -3.57  | 0.16 |
| 218543_s_at  | <b>PARP12</b>   | 64761 poly (ADP-ribose) polymerase family, member 12                                                                     | 6.03   | 0.00 |
| 232610_at    | <b>PARP14</b>   | 54625 poly (ADP-ribose) polymerase family, member 14                                                                     | 5.35   | 0.00 |
| 219034_at    | <b>PARP16</b>   | 54956 poly (ADP-ribose) polymerase family, member 16                                                                     | -4.63  | 0.25 |
| 219639_x_at  | <b>PARP6</b>    | 56965 poly (ADP-ribose) polymerase family, member 6                                                                      | 2.31   | 0.51 |
| 223220_s_at  | <b>PARP9</b>    | 83666 poly (ADP-ribose) polymerase family, member 9                                                                      | 2.06   | 0.06 |
| 202876_s_at  | <b>PBX2</b>     | 5089 pre-B-cell leukemia homeobox 2<br>Pre-B-cell leukemia homeobox interacting protein                                  | -3.49  | 0.03 |
| 214176_s_at  | <b>PBXIP1</b>   | 57326 1                                                                                                                  | -10.77 | 0.00 |
| 229194_at    | <b>PCGF5</b>    | 84333 polycomb group ring finger 5<br>protein-L-isoaspartate (D-aspartate) O-                                            | 2.62   | 0.13 |
| 212406_s_at  | <b>PCMTD2</b>   | 55251 methyltransferase domain containing 2                                                                              | -7.10  | 0.00 |
| 227759_at    | <b>PCSK9</b>    | 255738 proprotein convertase subtilisin/kexin type 9                                                                     | 3.62   | 0.00 |
| 220049_s_at  | <b>PDCD1LG2</b> | 80380 programmed cell death 1 ligand 2<br>programmed cell death 4 (neoplastic)                                           | 7.15   | 0.08 |
| 212593_s_at  | <b>PDCD4</b>    | 27250 transformation inhibitor)                                                                                          | -2.26  | 0.00 |
| 219275_at    | <b>PDCD5</b>    | 9141 programmed cell death 5                                                                                             | 2.91   | 0.06 |
| 208591_s_at  | <b>PDE3B</b>    | 5140 phosphodiesterase 3B, cGMP-inhibited<br>phosphodiesterase 4B, cAMP-specific<br>(phosphodiesterase E4 dunce homolog, | -6.40  | 0.25 |
| 211302_s_at  | <b>PDE4B</b>    | 5142 Drosophila)<br>phosphodiesterase 4D interacting protein                                                             | 3.47   | 0.00 |
| 205872_x_at  | <b>PDE4DIP</b>  | 9659 (myomegalin)                                                                                                        | 9.19   | 0.00 |
| 1552343_s_at | <b>PDE7A</b>    | 5150 phosphodiesterase 7A                                                                                                | -2.11  | 0.25 |
| 1555864_s_at | <b>PDHA1</b>    | 5160 pyruvate dehydrogenase (lipoamide) alpha 1                                                                          | 2.66   | 0.02 |
| 227033_at    | <b>PDIA3</b>    | 2923 protein disulfide isomerase family A, member 3                                                                      | 6.07   | 0.00 |
| 211048_s_at  | <b>PDIA4</b>    | 9601 protein disulfide isomerase family A, member 4                                                                      | 5.88   | 0.00 |
| 208639_x_at  | <b>PDIA6</b>    | 10130 protein disulfide isomerase family A, member 6                                                                     | 3.70   | 0.00 |
| 226452_at    | <b>PDK1</b>     | 5163 pyruvate dehydrogenase kinase, isozyme 1                                                                            | -3.48  | 0.00 |
| 221957_at    | <b>PDK3</b>     | 5165 pyruvate dehydrogenase kinase, isozyme 3                                                                            | -5.41  | 0.07 |
| 213983_s_at  | <b>PDS5A</b>    | PDS5, regulator of cohesion maintenance,<br>23244 homolog A (S. cerevisiae)                                              | 3.07   | 0.13 |
| 207956_x_at  | <b>PDS5B</b>    | PDS5, regulator of cohesion maintenance,<br>23047 homolog B (S. cerevisiae)                                              | -2.22  | 0.13 |
| 202671_s_at  | <b>PDXK</b>     | 8566 pyridoxal (pyridoxine, vitamin B6) kinase                                                                           | 4.86   | 0.00 |
| 223037_at    | <b>PDZD11</b>   | 51248 PDZ domain containing 11                                                                                           | 2.26   | 0.79 |
| 213549_at    | <b>PDZD8</b>    | 118987 PDZ domain containing 8                                                                                           | -5.62  | 0.16 |
| 200788_s_at  | <b>PEA15</b>    | 8682 phosphoprotein enriched in astrocytes 15<br>platelet/endothelial cell adhesion molecule (CD31                       | 5.00   | 0.06 |
| 208982_at    | <b>PECAM1</b>   | 5175 antigen)                                                                                                            | -7.49  | 0.00 |
| 232304_at    | <b>PELI1</b>    | 57162 Pellino homolog 1 (Drosophila)                                                                                     | -3.32  | 0.07 |
| 219132_at    | <b>PELI2</b>    | 57161 pellino homolog 2 (Drosophila)                                                                                     | -13.16 | 0.00 |
| 215354_s_at  | <b>PELP1</b>    | 27043 proline, glutamic acid and leucine rich protein 1                                                                  | 3.17   | 0.34 |
| 1558915_a_at | <b>PEX14</b>    | 5195 peroxisomal biogenesis factor 14                                                                                    | 2.25   | 0.16 |
| 218336_at    | <b>PFDN2</b>    | 5202 prefoldin subunit 2<br>6-phosphofructo-2-kinase/fructose-2,6-                                                       | 5.83   | 0.00 |
| 228499_at    | <b>PFKFB4</b>   | 5210 biphosphatase 4                                                                                                     | -11.02 | 0.16 |
| 204604_at    | <b>PFTK1</b>    | 5218 PFTAIRE protein kinase 1                                                                                            | -2.26  | 0.51 |
| 243815_at    | <b>PGBD4</b>    | 161779 piggyBac transposable element derived 4                                                                           | 4.28   | 0.34 |
| 203501_at    | <b>PGCP</b>     | 10404 plasma glutamate carboxypeptidase                                                                                  | -4.02  | 0.51 |
| 207384_at    | <b>PGLYRP1</b>  | 8993 peptidoglycan recognition protein 1                                                                                 | -6.96  | 0.08 |
| 201968_s_at  | <b>PGM1</b>     | 5236 phosphoglucomutase 1                                                                                                | -10.72 | 0.16 |

|              |                |                                                                                                                    |        |      |
|--------------|----------------|--------------------------------------------------------------------------------------------------------------------|--------|------|
| 223738_s_at  | <b>PGM2</b>    | 55276 phosphoglucomutase 2                                                                                         | -3.59  | 0.08 |
| 213638_at    | <b>PHACTR1</b> | 221692 phosphatase and actin regulator 1                                                                           | 13.84  | 0.00 |
| 204048_s_at  | <b>PHACTR2</b> | 9749 phosphatase and actin regulator 2                                                                             | 12.25  | 0.02 |
| 225958_at    | <b>PHC1</b>    | 1911 polyhomeotic homolog 1 (Drosophila)                                                                           | 15.66  | 0.00 |
| 200919_at    | <b>PHC2</b>    | 1912 polyhomeotic homolog 2 (Drosophila)                                                                           | -4.45  | 0.00 |
| 221816_s_at  | <b>PHF11</b>   | 51131 PHD finger protein 11                                                                                        | 3.12   | 0.06 |
| 234939_s_at  | <b>PHF12</b>   | 57649 PHD finger protein 12                                                                                        | -11.20 | 0.07 |
| 225820_at    | <b>PHF17</b>   | 79960 PHD finger protein 17                                                                                        | -8.93  | 0.07 |
| 212726_at    | <b>PHF2</b>    | 5253 PHD finger protein 2                                                                                          | -2.04  | 0.00 |
| 209423_s_at  | <b>PHF20</b>   | 51230 PHD finger protein 20                                                                                        | 2.05   | 0.34 |
| 219606_at    | <b>PHF20L1</b> | 51105 PHD finger protein 20-like 1                                                                                 | -2.55  | 0.03 |
| 203278_s_at  | <b>PHF21A</b>  | 51317 PHD finger protein 21A                                                                                       | -2.91  | 0.00 |
| 217952_x_at  | <b>PHF3</b>    | 23469 PHD finger protein 3                                                                                         | -2.33  | 0.07 |
| 217997_at    | <b>PHLDA1</b>  | 22822 pleckstrin homology-like domain, family A, member 1                                                          | 22.76  | 0.00 |
| 209803_s_at  | <b>PHLDA2</b>  | 7262 pleckstrin homology-like domain, family A, member 2<br>PH domain and leucine rich repeat protein              | 598.23 | 0.00 |
| 212719_at    | <b>PHLPP</b>   | 23239 phosphatase                                                                                                  | -12.49 | 0.00 |
| 225683_x_at  | <b>PHPT1</b>   | 29085 phosphohistidine phosphatase 1                                                                               | 2.41   | 0.25 |
| 41469_at     | <b>PI3</b>     | 5266 peptidase inhibitor 3, skin-derived (SKALP)                                                                   | 4.44   | 0.00 |
| 222631_at    | <b>PI4K2B</b>  | 55300 phosphatidylinositol 4-kinase type 2 beta                                                                    | 7.26   | 0.16 |
| 1555513_at   | <b>PIAS2</b>   | 9063 protein inhibitor of activated STAT, 2<br>phosphatidylinositol binding clathrin assembly protein              | -2.15  | 0.25 |
| 215832_x_at  | <b>PICALM</b>  | 8301 protein<br>phosphatidylinositol glycan anchor biosynthesis, class B                                           | -2.08  | 0.00 |
| 242760_x_at  | <b>PIGB</b>    | 9488 class B<br>phosphatidylinositol glycan anchor biosynthesis, class F                                           | -7.08  | 0.00 |
| 205077_s_at  | <b>PIGF</b>    | 5281 class F<br>phosphatidylinositol glycan anchor biosynthesis, class M                                           | 2.44   | 0.00 |
| 235168_at    | <b>PIGM</b>    | 93183 class M<br>phosphatidylinositol glycan anchor biosynthesis, class X                                          | 2.05   | 0.79 |
| 1552291_at   | <b>PIGX</b>    | 54965 class X<br>phosphatidylinositol glycan anchor biosynthesis, class Y                                          | -13.21 | 0.00 |
| 224660_at    | <b>PIGY</b>    | 84992 class Y                                                                                                      | 2.39   | 0.08 |
| 1554508_at   | <b>PIK3AP1</b> | 118788 phosphoinositide-3-kinase adaptor protein 1<br>phosphoinositide-3-kinase, catalytic, delta                  | 2.99   | 0.00 |
| 203879_at    | <b>PIK3CD</b>  | 5293 polypeptide<br>phosphoinositide-3-kinase, catalytic, gamma                                                    | -4.47  | 0.00 |
| 206369_s_at  | <b>PIK3CG</b>  | 5294 polypeptide                                                                                                   | -3.72  | 0.16 |
| 209193_at    | <b>PIM1</b>    | 5292 pim-1 oncogene                                                                                                | 2.06   | 0.00 |
| 209019_s_at  | <b>PINK1</b>   | 65018 PTEN induced putative kinase 1                                                                               | -15.65 | 0.00 |
| 214735_at    | <b>PIP3-E</b>  | 26034 phosphoinositide-binding protein PIP3-E<br>phosphatidylinositol-5-phosphate 4-kinase, type II, beta          | -6.33  | 0.07 |
| 1553048_a_at | <b>PIP4K2B</b> | 8396 beta<br>phosphatidylinositol-4-phosphate 5-kinase, type I, alpha                                              | 2.11   | 0.02 |
| 207391_s_at  | <b>PIP5K1A</b> | 8394 alpha                                                                                                         | 2.21   | 0.16 |
| 201192_s_at  | <b>PITPNA</b>  | 5306 phosphatidylinositol transfer protein, alpha                                                                  | 2.26   | 0.06 |
| 1561849_at   | <b>PKD1L2</b>  | 114780 polycystic kidney disease 1-like 2                                                                          | 2.13   | 0.34 |
| 201251_at    | <b>PKM2</b>    | 5315 pyruvate kinase, muscle                                                                                       | 6.34   | 0.13 |
| 212629_s_at  | <b>PKN2</b>    | 5586 protein kinase N2                                                                                             | -5.50  | 0.00 |
| 204196_x_at  | <b>PKNOX1</b>  | 5316 PBX/knotted 1 homeobox 1                                                                                      | -4.44  | 0.25 |
| 222171_s_at  | <b>PKNOX2</b>  | 63876 PBX/knotted 1 homeobox 2<br>phospholipase A2, group VII (platelet-activating factor acetylhydrolase, plasma) | -2.00  | 0.51 |
| 206214_at    | <b>PLA2G7</b>  | 7941 factor acetylhydrolase, plasma                                                                                | 30.89  | 0.00 |
| 202924_s_at  | <b>PLAGL2</b>  | 5326 pleiomorphic adenoma gene-like 2                                                                              | 4.75   | 0.25 |
| 205479_s_at  | <b>PLAU</b>    | 5328 plasminogen activator, urokinase                                                                              | 45.20  | 0.00 |
| 214866_at    | <b>PLAUR</b>   | 5329 plasminogen activator, urokinase receptor                                                                     | 3.87   | 0.00 |

|              |                   |                                                                                                         |       |      |
|--------------|-------------------|---------------------------------------------------------------------------------------------------------|-------|------|
| 204046_at    | <b>PLCB2</b>      | 5330 phospholipase C, beta 2                                                                            | -5.95 | 0.51 |
| 213309_at    | <b>PLCL2</b>      | 23228 phospholipase C-like 2<br>phosphatidylinositol-specific phospholipase C, X                        | -4.38 | 0.34 |
| 218951_s_at  | <b>PLCXD1</b>     | 55344 domain containing 1                                                                               | 2.90  | 0.06 |
| 224892_at    | <b>PLDN</b>       | 26258 pallidin homolog (mouse)                                                                          | 3.93  | 0.00 |
| 203470_s_at  | <b>PLEK</b>       | 5341 pleckstrin<br>pleckstrin homology domain containing, family B                                      | 2.93  | 0.00 |
| 201411_s_at  | <b>PLEKHB2</b>    | 55041 (evectins) member 2<br>pleckstrin homology domain containing, family C                            | 6.09  | 0.00 |
| 209210_s_at  | <b>PLEKHC1</b>    | 10979 (with FERM domain) member 1<br>pleckstrin homology domain containing, family G                    | -2.99 | 0.16 |
| 217044_s_at  | <b>PLEKHG3</b>    | 26030 (with RhoGef domain) member 3<br>pleckstrin homology domain containing, family G                  | -3.48 | 0.03 |
| 220073_s_at  | <b>PLEKHG6</b>    | 55200 (with RhoGef domain) member 6<br>pleckstrin homology domain containing, family J                  | -3.17 | 0.51 |
| 218290_at    | <b>PLEKHJ1</b>    | 55111 member 1                                                                                          | -2.07 | 0.25 |
|              | <b>PLGLA1</b> /// | 285189 ///                                                                                              |       |      |
|              | <b>PLGLB1</b> /// | 5342 ///                                                                                                |       |      |
| 205871_at    | <b>PLGLB2</b>     | 5343 plasminogen-like B2 /// plasminogen-like B1 ///                                                    | -3.97 | 0.00 |
|              | <b>PLGLB1</b> /// | 5342 ///                                                                                                |       |      |
| 214415_at    | <b>PLGLB2</b>     | 5343 plasminogen-like B2 /// plasminogen-like B1                                                        | -5.57 | 0.08 |
| 204958_at    | <b>PLK3</b>       | 1263 polo-like kinase 3 (Drosophila)                                                                    | 4.96  | 0.79 |
| 201136_at    | <b>PLP2</b>       | 5355 proteolipid protein 2 (colonic epithelium-enriched)                                                | -2.88 | 0.25 |
| 202430_s_at  | <b>PLSCR1</b>     | 5359 phospholipid scramblase 1                                                                          | 3.18  | 0.00 |
| 227276_at    | <b>PLXDC2</b>     | 84898 plexin domain containing 2                                                                        | -2.49 | 0.13 |
| 207290_at    | <b>PLXNA2</b>     | 5362 plexin A2                                                                                          | 2.53  | 0.13 |
| 1553139_s_at | <b>PLXNA3</b>     | 55558 plexin A3                                                                                         | 2.46  | 0.00 |
| 213241_at    | <b>PLXNC1</b>     | 10154 plexin C1                                                                                         | -2.74 | 0.00 |
| 1563657_at   | <b>PLXND1</b>     | 23129 plexin D1                                                                                         | 2.31  | 0.16 |
| 204286_s_at  | <b>PMAIP1</b>     | 5366 phorbol-12-myristate-13-acetate-induced protein 1                                                  | 2.02  | 0.02 |
| 217123_x_at  | <b>PMCHL1</b>     | 5369 pro-melanin-concentrating hormone-like 1                                                           | 2.01  | 0.16 |
| 239582_at    | <b>PML</b>        | 5371 promyelocytic leukemia                                                                             | 4.79  | 0.00 |
| 210139_s_at  | <b>PMP22</b>      | 5376 peripheral myelin protein 22                                                                       | 4.99  | 0.08 |
| 203718_at    | <b>PNPLA6</b>     | 10908 patatin-like phospholipase domain containing 6                                                    | 2.57  | 0.51 |
| 223310_x_at  | <b>PNPLA8</b>     | 50640 patatin-like phospholipase domain containing 8                                                    | 2.53  | 0.00 |
| 218511_s_at  | <b>PNPO</b>       | 55163 pyridoxamine 5'-phosphate oxidase                                                                 | 4.29  | 0.51 |
| 218229_s_at  | <b>POGK</b>       | 57645 pogo transposable element with KRAB domain<br>polymerase (DNA-directed), epsilon 4 (p12)          | 3.92  | 0.79 |
| 1553587_a_at | <b>POLE4</b>      | 56655 subunit)                                                                                          | 2.77  | 0.34 |
| 217635_s_at  | <b>POLG</b>       | 5428 polymerase (DNA directed), gamma                                                                   | 3.39  | 0.34 |
| 223261_at    | <b>POLK</b>       | 51426 polymerase (DNA directed) kappa                                                                   | 3.86  | 0.13 |
| 223403_s_at  | <b>POLR1B</b>     | 84172 polymerase (RNA) I polypeptide B, 128kDa                                                          | 2.79  | 0.79 |
| 209302_at    | <b>POLR2H</b>     | 5437 polymerase (RNA) II (DNA directed) polypeptide H<br>polymerase (RNA) II (DNA directed) polypeptide | 4.03  | 0.06 |
| 202635_s_at  | <b>POLR2K</b>     | 5440 K, 7.0kDa<br>polymerase (RNA) III (DNA directed) polypeptide                                       | 4.49  | 0.02 |
| 208361_s_at  | <b>POLR3D</b>     | 661 D, 44kDa<br>polymerase (RNA) III (DNA directed) polypeptide                                         | 5.23  | 0.34 |
| 218016_s_at  | <b>POLR3E</b>     | 55718 E (80kD)<br>polymerase (RNA) III (DNA directed) polypeptide                                       | 6.26  | 0.13 |
| 206654_s_at  | <b>POLR3G</b>     | 10622 G (32kD)                                                                                          | -2.39 | 0.34 |
| 222402_at    | <b>POMP</b>       | 51371 proteasome maturation protein                                                                     | 3.27  | 0.00 |
| 217848_s_at  | <b>PPA1</b>       | 5464 pyrophosphatase (inorganic) 1                                                                      | 11.44 | 0.00 |
| 212230_at    | <b>PPAP2B</b>     | 8613 phosphatidic acid phosphatase type 2B<br>phosphatidic acid phosphatase type 2 domain               | 50.86 | 0.16 |
| 223569_at    | <b>PPAPDC1B</b>   | 84513 containing 1B                                                                                     | 3.86  | 0.51 |

|              |                 |                                                      |        |      |
|--------------|-----------------|------------------------------------------------------|--------|------|
|              |                 | PTPRF interacting protein, binding protein 1 (liprin |        |      |
| 214374_s_at  | <b>PPFIBP1</b>  | 8496 beta 1)                                         | 4.18   | 0.00 |
| 200967_at    | <b>PPIB</b>     | 5479 peptidylprolyl isomerase B (cyclophilin B)      | 2.10   | 0.51 |
| 201489_at    | <b>PPIF</b>     | 10105 peptidylprolyl isomerase F (cyclophilin F)     | 3.60   | 0.00 |
| 222500_at    | <b>PPIL1</b>    | 51645 peptidylprolyl isomerase (cyclophilin)-like 1  | 7.60   | 0.08 |
| 242154_x_at  | <b>PPIL5</b>    | 122769 peptidylprolyl isomerase (cyclophilin)-like 5 | -3.33  | 0.51 |
|              |                 | Protein phosphatase 1A (formerly 2C),                |        |      |
| 231370_at    | <b>PPM1A</b>    | 5494 magnesium-dependent, alpha isoform              | -2.04  | 0.00 |
|              |                 | protein phosphatase 1B (formerly 2C),                |        |      |
| 209296_at    | <b>PPM1B</b>    | 5495 magnesium-dependent, beta isoform               | -2.78  | 0.00 |
|              |                 | protein phosphatase 1, regulatory (inhibitor)        |        |      |
| 201958_s_at  | <b>PPP1R12B</b> | 4660 subunit 12B                                     | -49.87 | 0.00 |
|              |                 | protein phosphatase 1, regulatory (inhibitor)        |        |      |
| 202014_at    | <b>PPP1R15A</b> | 23645 subunit 15A                                    | 3.73   | 0.00 |
|              |                 | protein phosphatase 1, regulatory (inhibitor)        |        |      |
| 204554_at    | <b>PPP1R3D</b>  | 5509 subunit 3D                                      | -2.47  | 0.13 |
|              |                 | protein phosphatase 2 (formerly 2A), catalytic       |        |      |
| 201375_s_at  | <b>PPP2CB</b>   | 5516 subunit, beta isoform                           | 2.47   | 0.16 |
|              |                 | protein phosphatase 2, regulatory subunit B',        |        |      |
| 202187_s_at  | <b>PPP2R5A</b>  | 5525 alpha isoform                                   | -9.48  | 0.00 |
|              |                 | protein phosphatase 2, regulatory subunit B',        |        |      |
| 1554365_a_at | <b>PPP2R5C</b>  | 5527 gamma isoform                                   | -3.61  | 0.07 |
|              |                 | protein phosphatase 3 (formerly 2B), catalytic       |        |      |
| 202425_x_at  | <b>PPP3CA</b>   | 5530 subunit, alpha isoform                          | -3.48  | 0.00 |
| 201594_s_at  | <b>PPP4R1</b>   | 9989 protein phosphatase 4, regulatory subunit 1     | -15.00 | 0.00 |
| 225429_at    | <b>PPP6C</b>    | 5537 protein phosphatase 6, catalytic subunit        | -2.63  | 0.51 |
| 241742_at    | <b>PRAM1</b>    | 84106 PML-RARA regulated adaptor molecule 1          | -5.82  | 0.00 |
| 208680_at    | <b>PRDX1</b>    | 5052 peroxiredoxin 1                                 | 16.23  | 0.00 |
|              |                 | phosphatidylinositol 3,4,5-trisphosphate-            |        |      |
| 224925_at    | <b>PREX1</b>    | 57580 dependent RAC exchanger 1                      | -2.41  | 0.00 |
| 214617_at    | <b>PRF1</b>     | 5551 perforin 1 (pore forming protein)               | 3.45   | 0.08 |
|              |                 | protein kinase, AMP-activated, gamma 1 non-          |        |      |
| 201805_at    | <b>PRKAG1</b>   | 5571 catalytic subunit                               | 2.62   | 0.00 |
| 218764_at    | <b>PRKCH</b>    | 5583 protein kinase C, eta                           | 3.68   | 0.08 |
| 38269_at     | <b>PRKD2</b>    | 25865 protein kinase D2                              | -2.22  | 0.25 |
|              |                 | protein kinase, DNA-activated, catalytic             |        |      |
| 210543_s_at  | <b>PRKDC</b>    | 5591 polypeptide                                     | -9.85  | 0.00 |
| 204061_at    | <b>PRKX</b>     | 5613 protein kinase, X-linked                        | 3.55   | 0.16 |
| 206445_s_at  | <b>PRMT1</b>    | 3276 protein arginine methyltransferase 1            | 4.40   | 0.16 |
| 221564_at    | <b>PRMT2</b>    | 3275 protein arginine methyltransferase 2            | -2.34  | 0.51 |
| 1564520_s_at | <b>PRMT5</b>    | 10419 protein arginine methyltransferase 5           | -2.90  | 0.51 |
|              |                 | prion protein (p27-30) (Creutzfeldt-Jakob disease,   |        |      |
|              |                 | Gerstmann-Strausler-Scheinker syndrome, fatal        |        |      |
| 201300_s_at  | <b>PRNP</b>     | 5621 familial insomnia)                              | 11.76  | 0.34 |
| 215837_x_at  | <b>PRO1621</b>  | 29007 PRO1621 protein                                | -2.01  | 0.51 |
| 203650_at    | <b>PROCR</b>    | 10544 protein C receptor, endothelial (EPCR)         | 37.42  | 0.00 |
| 232629_at    | <b>PROK2</b>    | 60675 prokineticin 2                                 | -14.97 | 0.00 |
|              |                 | proline synthetase co-transcribed homolog            |        |      |
| 209384_at    | <b>PROSC</b>    | 11212 (bacterial)                                    | 3.37   | 0.16 |
|              |                 | PRP18 pre-mRNA processing factor 18 homolog          |        |      |
| 221546_at    | <b>PRPF18</b>   | 8559 ( <i>S. cerevisiae</i> )                        | -2.72  | 0.08 |
|              |                 | PRP19/PSO4 pre-mRNA processing factor 19             |        |      |
| 203103_s_at  | <b>PRPF19</b>   | 27339 homolog ( <i>S. cerevisiae</i> )               | 5.82   | 0.25 |
|              |                 | PRP38 pre-mRNA processing factor 38 (yeast)          |        |      |
| 230270_at    | <b>PRPF38B</b>  | 55119 domain containing B                            | -4.19  | 0.79 |
|              |                 | PRP39 pre-mRNA processing factor 39 homolog          |        |      |
| 220553_s_at  | <b>PRPF39</b>   | 55015 ( <i>S. cerevisiae</i> )                       | 3.77   | 0.16 |
|              |                 | phosphoribosyl pyrophosphate synthetase-             |        |      |
| 202529_at    | <b>PRPSAP1</b>  | 5635 associated protein 1                            | 3.95   | 0.06 |
| 221734_at    | <b>PRRC1</b>    | 133619 proline-rich coiled-coil 1                    | 2.55   | 0.79 |



|             |                |                                                                                             |       |      |
|-------------|----------------|---------------------------------------------------------------------------------------------|-------|------|
| 223062_s_at | <b>PSAT1</b>   | 29968 phosphoserine aminotransferase 1<br>pleckstrin homology, Sec7 and coiled-coil         | 4.16  | 0.13 |
| 1554335_at  | <b>PSCD4</b>   | 27128 domains 4                                                                             | -3.90 | 0.34 |
| 215821_x_at | <b>PSG3</b>    | 5671 pregnancy specific beta-1-glycoprotein 3                                               | 2.29  | 0.02 |
| 209337_at   | <b>PSIP1</b>   | 11168 PC4 and SFRS1 interacting protein 1<br>proteasome (prosome, macropain) subunit, alpha | -5.25 | 0.25 |
| 201676_x_at | <b>PSMA1</b>   | 5682 type, 1<br>proteasome (prosome, macropain) subunit, alpha                              | 4.01  | 0.00 |
| 201317_s_at | <b>PSMA2</b>   | 5683 type, 2<br>proteasome (prosome, macropain) subunit, alpha                              | 3.59  | 0.00 |
| 201532_at   | <b>PSMA3</b>   | 5684 type, 3<br>proteasome (prosome, macropain) subunit, alpha                              | 3.47  | 0.00 |
| 203396_at   | <b>PSMA4</b>   | 5685 type, 4<br>proteasome (prosome, macropain) subunit, alpha                              | 2.84  | 0.00 |
| 201274_at   | <b>PSMA5</b>   | 5686 type, 5<br>proteasome (prosome, macropain) subunit, alpha                              | 7.07  | 0.00 |
| 208805_at   | <b>PSMA6</b>   | 5687 type, 6<br>proteasome (prosome, macropain) subunit, alpha                              | 4.59  | 0.00 |
| 201114_x_at | <b>PSMA7</b>   | 5688 type, 7<br>proteasome (prosome, macropain) subunit, beta                               | 2.02  | 0.02 |
| 214288_s_at | <b>PSMB1</b>   | 5689 type, 1<br>proteasome (prosome, macropain) subunit, beta                               | 2.04  | 0.02 |
| 200039_s_at | <b>PSMB2</b>   | 5690 type, 2<br>proteasome (prosome, macropain) subunit, beta                               | 2.38  | 0.00 |
| 202243_s_at | <b>PSMB4</b>   | 5692 type, 4<br>proteasome (prosome, macropain) subunit, beta                               | 2.94  | 0.00 |
| 208799_at   | <b>PSMB5</b>   | 5693 type, 5<br>proteasome (prosome, macropain) subunit, beta                               | 5.55  | 0.13 |
| 208827_at   | <b>PSMB6</b>   | 5694 type, 6<br>proteasome (prosome, macropain) 26S subunit,                                | 2.94  | 0.08 |
| 201068_s_at | <b>PSMC2</b>   | 5701 ATPase, 2<br>proteasome (prosome, macropain) 26S subunit,                              | 6.71  | 0.00 |
| 201267_s_at | <b>PSMC3</b>   | 5702 ATPase, 3<br>proteasome (prosome, macropain) 26S subunit,                              | 3.38  | 0.25 |
| 209503_s_at | <b>PSMC5</b>   | 5705 ATPase, 5<br>proteasome (prosome, macropain) 26S subunit,                              | 2.94  | 0.16 |
| 201199_s_at | <b>PSMD1</b>   | 5707 non-ATPase, 1<br>proteasome (prosome, macropain) 26S subunit,                          | 2.65  | 0.08 |
| 212296_at   | <b>PSMD14</b>  | 10213 non-ATPase, 14<br>proteasome (prosome, macropain) 26S subunit,                        | 6.86  | 0.16 |
| 200830_at   | <b>PSMD2</b>   | 5708 non-ATPase, 2<br>proteasome (prosome, macropain) 26S subunit,                          | 2.04  | 0.79 |
| 201388_at   | <b>PSMD3</b>   | 5709 non-ATPase, 3<br>Proteasome (prosome, macropain) 26S subunit,                          | 14.27 | 0.00 |
| 1555884_at  | <b>PSMD6</b>   | 9861 non-ATPase, 6<br>proteasome (prosome, macropain) 26S subunit,                          | -2.62 | 0.13 |
| 201705_at   | <b>PSMD7</b>   | 5713 non-ATPase, 7<br>proteasome (prosome, macropain) 26S subunit,                          | 2.44  | 0.16 |
| 200820_at   | <b>PSMD8</b>   | 5714 non-ATPase, 8<br>proteasome (prosome, macropain) activator                             | 6.17  | 0.00 |
| 201762_s_at | <b>PSME2</b>   | 5721 subunit 2 (PA28 beta)<br>proteasome (prosome, macropain) activator                     | 3.85  | 0.00 |
| 209852_x_at | <b>PSME3</b>   | 10197 subunit 3 (PA28 gamma; Ki)<br>proline-serine-threonine phosphatase interacting        | -2.08 | 0.51 |
| 211178_s_at | <b>PSTPIP1</b> | 9051 protein 1<br>proline-serine-threonine phosphatase interacting                          | -5.87 | 0.00 |
| 219938_s_at | <b>PSTPIP2</b> | 9050 protein 2                                                                              | 7.52  | 0.00 |
| 211271_x_at | <b>PTBP1</b>   | 5725 polypyrimidine tract binding protein 1                                                 | 2.01  | 0.51 |
| 201433_s_at | <b>PTDSS1</b>  | 9791 phosphatidylserine synthase 1<br>phosphatase and tensin homolog (mutated in            | 4.70  | 0.08 |
| 211711_s_at | <b>PTEN</b>    | 5728 multiple advanced cancers 1)                                                           | -2.52 | 0.00 |

|             |                  |                                                                                                                      |        |      |
|-------------|------------------|----------------------------------------------------------------------------------------------------------------------|--------|------|
| 217494_s_at | <b>PTENP1</b>    | 11191 phosphatase and tensin homolog (mutated in multiple advanced cancers 1), pseudogene 1                          | -2.53  | 0.00 |
| 211892_s_at | <b>PTGIS</b>     | 5740 prostaglandin I2 (prostacyclin) synthase                                                                        | -2.03  | 0.51 |
| 234000_s_at | <b>PTPLAD1</b>   | 51495 protein tyrosine phosphatase-like A domain containing 1                                                        | 5.12   | 0.02 |
| 244050_at   | <b>PTPLAD2</b>   | 401494 protein tyrosine phosphatase-like A domain containing 2                                                       | -6.31  | 0.00 |
| 203555_at   | <b>PTPN18</b>    | 26469 protein tyrosine phosphatase, non-receptor type 18 (brain-derived)                                             | -2.10  | 0.51 |
| 213136_at   | <b>PTPN2</b>     | 5771 protein tyrosine phosphatase, non-receptor type 2                                                               | 2.42   | 0.02 |
| 204852_s_at | <b>PTPN7</b>     | 5778 protein tyrosine phosphatase, non-receptor type 7                                                               | 2.52   | 0.16 |
| 209899_s_at | <b>PUF60</b>     | 22827 poly-U binding splicing factor 60KDa                                                                           | 3.32   | 0.25 |
| 1552274_at  | <b>PXK</b>       | 54899 PX domain containing serine/threonine kinase                                                                   | -3.18  | 0.07 |
| 211823_s_at | <b>PXN</b>       | 5829 paxillin                                                                                                        | -6.20  | 0.00 |
| 1552599_at  | <b>PXT1</b>      | 222659 peroxisomal, testis specific 1                                                                                | 2.21   | 0.51 |
| 221666_s_at | <b>PYCARD</b>    | 29108 PYD and CARD domain containing phosphorylase, glycogen; liver (Hers disease, glycogen storage disease type VI) | -3.67  | 0.16 |
| 202990_at   | <b>PYGL</b>      | 5836 glycogen storage disease type VI)                                                                               | -11.19 | 0.00 |
| 219681_s_at | <b>RAB11FIP1</b> | 80223 RAB11 family interacting protein 1 (class I)                                                                   | -3.22  | 0.00 |
| 225746_at   | <b>RAB11FIP4</b> | 84440 RAB11 family interacting protein 4 (class II)                                                                  | -13.95 | 0.51 |
| 235059_at   | <b>RAB12</b>     | 201475 RAB12, member RAS oncogene family                                                                             | 5.42   | 0.00 |
| 202252_at   | <b>RAB13</b>     | 5872 RAB13, member RAS oncogene family                                                                               | 2.30   | 0.08 |
| 219622_at   | <b>RAB20</b>     | 55647 RAB20, member RAS oncogene family                                                                              | 9.38   | 0.00 |
| 209515_s_at | <b>RAB27A</b>    | 5873 RAB27A, member RAS oncogene family                                                                              | -2.23  | 0.07 |
| 228113_at   | <b>RAB37</b>     | 326624 RAB37, member RAS oncogene family                                                                             | -16.30 | 0.00 |
| 1554800_at  | <b>RAB39</b>     | 54734 RAB39, member RAS oncogene family                                                                              | 9.08   | 0.06 |
| 225001_at   | <b>RAB3D</b>     | 9545 RAB3D, member RAS oncogene family                                                                               | -5.44  | 0.00 |
| 203136_at   | <b>RABAC1</b>    | 10567 Rab acceptor 1 (prenylated)                                                                                    | -2.35  | 0.25 |
| 203020_at   | <b>RABGAP1L</b>  | 9910 RAB GTPase activating protein 1-like                                                                            | -7.81  | 0.00 |
| 209181_s_at | <b>RABGGTB</b>   | 5876 Rab geranylgeranyltransferase, beta subunit                                                                     | 3.97   | 0.13 |
| 201039_s_at | <b>RAD23A</b>    | 5886 RAD23 homolog A (S. cerevisiae)                                                                                 | 8.01   | 0.00 |
| 201244_s_at | <b>RAF1</b>      | 5894 v-raf-1 murine leukemia viral oncogene homolog 1 recombination activating gene 1 activating protein             | -2.98  | 0.00 |
| 219125_s_at | <b>RAG1AP1</b>   | 55974 1                                                                                                              | 2.61   | 0.25 |
| 215117_at   | <b>RAG2</b>      | 5897 recombination activating gene 2 v-ral simian leukemia viral oncogene homolog A                                  | 2.49   | 0.16 |
| 214435_x_at | <b>RALA</b>      | 5898 (ras related)                                                                                                   | 5.00   | 0.00 |
| 202844_s_at | <b>RALBP1</b>    | 10928 ralA binding protein 1                                                                                         | -4.55  | 0.00 |
| 209050_s_at | <b>RALGDS</b>    | 5900 ral guanine nucleotide dissociation stimulator                                                                  | 93.68  | 0.00 |
| 232112_at   | <b>RALGPS2</b>   | 55103 Ral GEF with PH domain and SH3 binding motif 2                                                                 | -3.81  | 0.34 |
| 201271_s_at | <b>RALY</b>      | 22913 RNA binding protein, autoantigenic (hnRNP-associated with lethal yellow homolog (mouse))                       | -2.57  | 0.79 |
| 200750_s_at | <b>RAN</b>       | 5901 RAN, member RAS oncogene family                                                                                 | 4.00   | 0.08 |
| 221915_s_at | <b>RANBP1</b>    | 5902 RAN binding protein 1                                                                                           | 2.19   | 0.08 |
| 201713_s_at | <b>RANBP2</b>    | 5903 RAN binding protein 2                                                                                           | 3.15   | 0.00 |
| 236906_x_at | <b>RANBP5</b>    | 3843 RAN binding protein 5                                                                                           | 2.09   | 0.79 |
| 218668_s_at | <b>RAP2C</b>     | 57826 RAP2C, member of RAS oncogene family                                                                           | 2.19   | 0.16 |
| 203097_s_at | <b>RAPGEF2</b>   | 9693 Rap guanine nucleotide exchange factor (GEF) 2                                                                  | -2.61  | 0.00 |
| 203749_s_at | <b>RARA</b>      | 5914 retinoic acid receptor, alpha retinoic acid receptor responder (tazarotene induced) 3                           | -2.35  | 0.25 |
| 204070_at   | <b>RARRES3</b>   | 5920 induced) 3                                                                                                      | 12.10  | 0.00 |
| 201330_at   | <b>RARS</b>      | 5917 arginyl-tRNA synthetase                                                                                         | 3.58   | 0.34 |

|             |                                                                                                                         |                                                                                                                                                                                                                                                                                                                                                                      |        |      |
|-------------|-------------------------------------------------------------------------------------------------------------------------|----------------------------------------------------------------------------------------------------------------------------------------------------------------------------------------------------------------------------------------------------------------------------------------------------------------------------------------------------------------------|--------|------|
| 232902_s_at | <b>RARS2</b>                                                                                                            | 57038 arginyl-tRNA synthetase 2, mitochondrial (putative)                                                                                                                                                                                                                                                                                                            | 2.03   | 0.51 |
| 208206_s_at | <b>RASGRP2</b>                                                                                                          | 10235 RAS guanyl releasing protein 2 (calcium and DAG-regulated)                                                                                                                                                                                                                                                                                                     | -3.38  | 0.00 |
| 240862_at   | <b>RASGRP4</b>                                                                                                          | 115727 RAS guanyl releasing protein 4                                                                                                                                                                                                                                                                                                                                | -4.57  | 0.00 |
| 204346_s_at | <b>RASSF1</b>                                                                                                           | 11186 Ras association (RalGDS/AF-6) domain family 1                                                                                                                                                                                                                                                                                                                  | -3.47  | 0.16 |
| 212870_at   | <b>RASSF3</b>                                                                                                           | 283349 Ras association (RalGDS/AF-6) domain family 3                                                                                                                                                                                                                                                                                                                 | -8.83  | 0.16 |
| 202033_s_at | <b>RB1CC1</b>                                                                                                           | 9821 RB1-inducible coiled-coil 1                                                                                                                                                                                                                                                                                                                                     | -2.57  | 0.07 |
| 210371_s_at | <b>RBBP4</b>                                                                                                            | 5928 retinoblastoma binding protein 4                                                                                                                                                                                                                                                                                                                                | 2.14   | 0.79 |
| 212783_at   | <b>RBBP6</b>                                                                                                            | 5930 retinoblastoma binding protein 6                                                                                                                                                                                                                                                                                                                                | 2.06   | 0.25 |
| 203344_s_at | <b>RBBP8</b>                                                                                                            | 5932 retinoblastoma binding protein 8                                                                                                                                                                                                                                                                                                                                | 2.41   | 0.79 |
| 232751_at   | <b>RBBP9</b>                                                                                                            | 10741 retinoblastoma binding protein 9<br>RanBP-type and C3HC4-type zinc finger                                                                                                                                                                                                                                                                                      | 4.43   | 0.16 |
| 221827_at   | <b>RBCK1</b>                                                                                                            | 10616 containing 1                                                                                                                                                                                                                                                                                                                                                   | 2.75   | 0.02 |
| 212331_at   | <b>RBL2</b>                                                                                                             | 5934 retinoblastoma-like 2 (p130)                                                                                                                                                                                                                                                                                                                                    | -6.50  | 0.00 |
| 51228_at    | <b>RBM12B</b>                                                                                                           | 389677 RNA binding motif protein 12B                                                                                                                                                                                                                                                                                                                                 | -2.11  | 0.51 |
| 211686_s_at | <b>RBM13</b>                                                                                                            | 84549 RNA binding motif protein 13                                                                                                                                                                                                                                                                                                                                   | 9.76   | 0.08 |
| 219286_s_at | <b>RBM15</b>                                                                                                            | 64783 RNA binding motif protein 15                                                                                                                                                                                                                                                                                                                                   | 2.13   | 0.51 |
| 224781_s_at | <b>RBM17</b>                                                                                                            | 84991 RNA binding motif protein 17                                                                                                                                                                                                                                                                                                                                   | 2.16   | 0.06 |
| 218593_at   | <b>RBM28</b>                                                                                                            | 55131 RNA binding motif protein 28                                                                                                                                                                                                                                                                                                                                   | 6.39   | 0.06 |
| 208319_s_at | <b>RBM3</b>                                                                                                             | 5935 RNA binding motif (RNP1, RRM) protein 3                                                                                                                                                                                                                                                                                                                         | 2.62   | 0.00 |
| 225839_at   | <b>RBM33</b>                                                                                                            | 155435 RNA binding motif protein 33                                                                                                                                                                                                                                                                                                                                  | -4.62  | 0.00 |
| 212591_at   | <b>RBM34</b>                                                                                                            | 23029 RNA binding motif protein 34                                                                                                                                                                                                                                                                                                                                   | 4.16   | 0.00 |
| 225141_at   | <b>RBM35B</b>                                                                                                           | 80004 RNA binding motif protein 35B                                                                                                                                                                                                                                                                                                                                  | -4.18  | 0.34 |
| 218379_at   | <b>RBM7</b>                                                                                                             | 10179 RNA binding motif protein 7                                                                                                                                                                                                                                                                                                                                    | 2.20   | 0.34 |
|             |                                                                                                                         | RNA binding motif protein, Y-linked, family 1, member A1 /// RNA binding motif protein, Y-linked, family 1, member F /// RNA binding motif protein, Y-linked, family 1, member B /// RNA binding motif protein, Y-linked, family 1, member D /// RNA binding motif protein, Y-linked, family 1, member E /// RNA binding motif protein, Y-linked, family 1, member J |        |      |
| 208307_at   | <b>RBMY1A1</b> ///<br><b>RBMY1B</b> ///<br><b>RBMY1D</b> ///<br><b>RBMY1E</b> ///<br><b>RBMY1F</b> ///<br><b>RBMY1J</b> | 159163 ///<br>378948 ///<br>378949 ///<br>378950 ///<br>378951 ///<br>5940                                                                                                                                                                                                                                                                                           | 2.14   | 0.16 |
| 1552952_at  | <b>RBMY2FP</b>                                                                                                          | 159162 RNA binding motif protein, Y-linked, family 2, member F pseudogene                                                                                                                                                                                                                                                                                            | 3.33   | 0.00 |
| 238066_at   | <b>RBP7</b>                                                                                                             | 116362 retinol binding protein 7, cellular                                                                                                                                                                                                                                                                                                                           | -29.98 | 0.00 |
| 208370_s_at | <b>RCAN1</b>                                                                                                            | 1827 regulator of calcineurin 1<br>regulator of chromosome condensation (RCC1)                                                                                                                                                                                                                                                                                       | 2.42   | 0.79 |
| 204759_at   | <b>RCBTB2</b>                                                                                                           | 1102 and BTB (POZ) domain containing protein 2                                                                                                                                                                                                                                                                                                                       | -2.90  | 0.00 |
| 224578_at   | <b>RCC2</b>                                                                                                             | 55920 regulator of chromosome condensation 2<br>ring finger and CHY zinc finger domain containing                                                                                                                                                                                                                                                                    | 2.46   | 0.79 |
| 214281_s_at | <b>RCHY1</b>                                                                                                            | 25898 1                                                                                                                                                                                                                                                                                                                                                              | 2.63   | 0.00 |
| 201063_at   | <b>RCN1</b>                                                                                                             | 5954 reticulocalbin 1, EF-hand calcium binding domain                                                                                                                                                                                                                                                                                                                | 6.18   | 0.34 |
| 61734_at    | <b>RCN3</b>                                                                                                             | 57333 reticulocalbin 3, EF-hand calcium binding domain                                                                                                                                                                                                                                                                                                               | -2.48  | 0.13 |
| 212612_at   | <b>RCOR1</b>                                                                                                            | 23186 REST corepressor 1                                                                                                                                                                                                                                                                                                                                             | -2.30  | 0.08 |
| 222203_s_at | <b>RDH14</b>                                                                                                            | 57665 retinol dehydrogenase 14 (all-trans/9-cis/11-cis) reversion-inducing-cysteine-rich protein with kazal motifs                                                                                                                                                                                                                                                   | 2.52   | 0.34 |
| 205407_at   | <b>RECK</b>                                                                                                             | 8434 motifs                                                                                                                                                                                                                                                                                                                                                          | 4.47   | 0.25 |
| 208873_s_at | <b>REEP5</b>                                                                                                            | 7905 receptor accessory protein 5<br>v-rel reticuloendotheliosis viral oncogene homolog                                                                                                                                                                                                                                                                              | -3.69  | 0.00 |
| 206036_s_at | <b>REL</b>                                                                                                              | 5966 (avian)                                                                                                                                                                                                                                                                                                                                                         | 2.35   | 0.16 |

|              |                 |                                                                                                                                                    |        |      |
|--------------|-----------------|----------------------------------------------------------------------------------------------------------------------------------------------------|--------|------|
| 201783_s_at  | <b>RELA</b>     | v-rel reticuloendotheliosis viral oncogene homolog<br>A, nuclear factor of kappa light polypeptide gene<br>5970 enhancer in B-cells 3, p65 (avian) | 3.54   | 0.00 |
| 205205_at    | <b>RELB</b>     | v-rel reticuloendotheliosis viral oncogene homolog<br>B, nuclear factor of kappa light polypeptide gene<br>5971 enhancer in B-cells 3 (avian)      | 4.61   | 0.34 |
| 227425_at    | <b>REPS2</b>    | 9185 RALBP1 associated Eps domain containing 2                                                                                                     | -12.07 | 0.00 |
| 200940_s_at  | <b>RERE</b>     | 473 arginine-glutamic acid dipeptide (RE) repeats<br>REX1, RNA exonuclease 1 homolog (S.                                                           | -2.16  | 0.00 |
| 226144_at    | <b>REXO1</b>    | 57455 cerevisiae)                                                                                                                                  | 2.44   | 0.02 |
| 203224_at    | <b>RFK</b>      | 55312 riboflavin kinase                                                                                                                            | 3.59   | 0.00 |
| 234950_s_at  | <b>RFWD2</b>    | 64326 ring finger and WD repeat domain 2<br>regulatory factor X, 2 (influences HLA class II<br>expression)                                         | -2.19  | 0.00 |
| 208031_s_at  | <b>RFX2</b>     | 5990 regulatory factor X, 5 (influences HLA class II<br>expression)                                                                                | -2.34  | 0.34 |
| 202963_at    | <b>RFX5</b>     | 5993 ral guanine nucleotide dissociation stimulator-like                                                                                           | 5.07   | 0.00 |
| 209568_s_at  | <b>RGL1</b>     | 23179 1                                                                                                                                            | 27.91  | 0.02 |
| 235816_s_at  | <b>Rgr</b>      | 266747 Ral-GDS related protein Rgr                                                                                                                 | -4.14  | 0.51 |
| 204319_s_at  | <b>RGS10</b>    | 6001 regulator of G-protein signaling 10                                                                                                           | 4.53   | 0.25 |
| 38290_at     | <b>RGS14</b>    | 10636 regulator of G-protein signaling 14                                                                                                          | -13.29 | 0.00 |
| 209325_s_at  | <b>RGS16</b>    | 6004 regulator of G-protein signaling 16                                                                                                           | 2.70   | 0.79 |
| 223809_at    | <b>RGS18</b>    | 64407 regulator of G-protein signaling 18                                                                                                          | -28.59 | 0.00 |
| 202388_at    | <b>RGS2</b>     | 5997 regulator of G-protein signaling 2, 24kDa                                                                                                     | -5.08  | 0.00 |
| 227414_at    | <b>RHBDD1</b>   | 84236 rhomboid domain containing 1                                                                                                                 | 11.21  | 0.51 |
| 219202_at    | <b>RHBDF2</b>   | 79651 rhomboid 5 homolog 2 (Drosophila)                                                                                                            | 11.64  | 0.00 |
| 1555780_a_at | <b>RHEB</b>     | 6009 Ras homolog enriched in brain                                                                                                                 | 4.02   | 0.13 |
| 212099_at    | <b>RHOB</b>     | 388 ras homolog gene family, member B                                                                                                              | -3.58  | 0.00 |
| 200885_at    | <b>RHOC</b>     | 389 ras homolog gene family, member C                                                                                                              | 6.22   | 0.00 |
| 203175_at    | <b>RHOG</b>     | 391 ras homolog gene family, member G (rho G)                                                                                                      | -2.27  | 0.13 |
| 204951_at    | <b>RHOH</b>     | 399 ras homolog gene family, member H                                                                                                              | 26.50  | 0.00 |
| 212117_at    | <b>RHOQ</b>     | 23433 ras homolog gene family, member Q                                                                                                            | 2.20   | 0.00 |
| 223168_at    | <b>RHOU</b>     | 58480 ras homolog gene family, member U                                                                                                            | 3.48   | 0.34 |
| 241990_at    | <b>RHOV</b>     | 171177 ras homolog gene family, member V                                                                                                           | 2.01   | 0.02 |
| 226312_at    | <b>RICTOR</b>   | 253260 rapamycin-insensitive companion of mTOR                                                                                                     | -2.58  | 0.00 |
| 209684_at    | <b>RIN2</b>     | 54453 Ras and Rab interactor 2                                                                                                                     | 4.06   | 0.16 |
| 220439_at    | <b>RIN3</b>     | 79890 Ras and Rab interactor 3                                                                                                                     | -3.31  | 0.51 |
| 209545_s_at  | <b>RIPK2</b>    | 8767 receptor-interacting serine-threonine kinase 2                                                                                                | 21.40  | 0.00 |
| 204243_at    | <b>RLF</b>      | 6018 rearranged L-myc fusion<br>RMI1, RecQ mediated genome instability 1,                                                                          | 2.05   | 0.13 |
| 218979_at    | <b>RMI1</b>     | 80010 homolog (S. cerevisiae)<br>required for meiotic nuclear division 5 homolog A                                                                 | -2.66  | 0.13 |
| 212478_at    | <b>RMND5A</b>   | 64795 (S. cerevisiae)<br>ribonuclease, RNase A family, 2 (liver, eosinophil-                                                                       | -2.95  | 0.07 |
| 206111_at    | <b>RNASE2</b>   | 6036 derived neurotoxin)                                                                                                                           | -17.71 | 0.25 |
| 213397_x_at  | <b>RNASE4</b>   | 6038 ribonuclease, RNase A family, 4                                                                                                               | 2.02   | 0.13 |
| 203022_at    | <b>RNASEH2A</b> | 10535 ribonuclease H2, subunit A                                                                                                                   | 2.48   | 0.51 |
| 217984_at    | <b>RNASET2</b>  | 8635 ribonuclease T2                                                                                                                               | -10.62 | 0.00 |
| 208632_at    | <b>RNF10</b>    | 9921 ring finger protein 10                                                                                                                        | -2.86  | 0.25 |
| 223591_at    | <b>RNF135</b>   | 84282 ring finger protein 135                                                                                                                      | -3.34  | 0.34 |
| 226106_at    | <b>RNF141</b>   | 50862 ring finger protein 141                                                                                                                      | -4.75  | 0.00 |
| 227726_at    | <b>RNF166</b>   | 115992 ring finger protein 166                                                                                                                     | -2.33  | 0.07 |
| 229932_at    | <b>RNF181</b>   | 51255 Ring finger protein 181                                                                                                                      | 7.24   | 0.16 |
| 224750_at    | <b>RNF185</b>   | 91445 ring finger protein 185                                                                                                                      | 4.03   | 0.16 |
| 225929_s_at  | <b>RNF213</b>   | 57674 ring finger protein 213                                                                                                                      | 2.38   | 0.00 |
| 210706_s_at  | <b>RNF24</b>    | 11237 ring finger protein 24                                                                                                                       | -2.34  | 0.03 |

|             |                          |                                                                                                        |        |      |
|-------------|--------------------------|--------------------------------------------------------------------------------------------------------|--------|------|
| 203286_at   | <b>RNF44</b>             | 22838 ring finger protein 44                                                                           | -3.00  | 0.00 |
| 202683_s_at | <b>RNMT</b>              | 8731 RNA (guanine-7-) methyltransferase                                                                | 4.74   | 0.06 |
| 226975_at   | <b>RNPC3</b>             | 55599 RNA-binding region (RNP1, RRM) containing 3                                                      | -2.30  | 0.00 |
| 218301_at   | <b>RNPEPL1</b>           | 57140 arginyl aminopeptidase (aminopeptidase B)-like 1 roundabout, axon guidance receptor, homolog 1   | -5.99  | 0.08 |
| 213194_at   | <b>ROBO1</b>             | 6091 (Drosophila) Rho-associated, coiled-coil containing protein                                       | 2.35   | 0.13 |
| 214578_s_at | <b>ROCK1</b>             | 6093 kinase 1 Rho-associated, coiled-coil containing protein                                           | -2.22  | 0.00 |
| 211504_x_at | <b>ROCK2</b>             | 9475 kinase 2                                                                                          | -2.25  | 0.79 |
| 214697_s_at | <b>ROD1</b>              | 9991 ROD1 regulator of differentiation 1 (S. pombe)                                                    | -2.12  | 0.03 |
| 223609_at   | <b>ROPN1L</b>            | 83853 ropporin 1-like                                                                                  | -6.26  | 0.07 |
| 220436_at   | <b>RP11-138L21.1</b>     | 389722 similar to cell recognition molecule CASPR3                                                     | -12.03 | 0.34 |
| 1569932_at  | <b>RP11-262D11.5</b>     | 340527 similar to Nance-Horan syndrome protein                                                         | -4.54  | 0.16 |
| 214748_at   | <b>RP11-298P3.3</b>      | 88523 CG016                                                                                            | 3.43   | 0.79 |
| 227040_at   | <b>RP11-50D16.3</b>      | 387921 similar to RIKEN cDNA 8030451K01                                                                | 8.50   | 0.25 |
| 221143_at   | <b>RPA4</b>              | 29935 replication protein A4, 34kDa                                                                    | 3.34   | 0.34 |
| 228183_s_at | <b>RPAIN</b>             | 84268 RPA interacting protein                                                                          | 2.35   | 0.34 |
| 218441_s_at | <b>RPAP1</b>             | 26015 RNA polymerase II associated protein 1                                                           | 2.22   | 0.34 |
| 221770_at   | <b>RPE</b>               | 6120 ribulose-5-phosphate-3-epimerase retinitis pigmentosa GTPase regulator interacting                | 3.96   | 0.51 |
| 206608_s_at | <b>RPGRIP1</b>           | 57096 protein 1                                                                                        | -2.26  | 0.51 |
| 221475_s_at | <b>RPL15</b>             | 6138 ribosomal protein L15                                                                             | 2.78   | 0.06 |
| 200022_at   | <b>RPL18</b>             | 6141 ribosomal protein L18                                                                             | 2.41   | 0.34 |
| 200013_at   | <b>RPL24</b>             | 6152 ribosomal protein L24                                                                             | 3.23   | 0.00 |
| 214143_x_at | <b>RPL24 /// SLC36A2</b> | 153201 /// ribosomal protein L24 /// solute carrier family 36 (proton/amino acid symporter), member 2  | 2.74   | 0.00 |
| 200002_at   | <b>RPL35</b>             | 11224 ribosomal protein L35                                                                            | 2.22   | 0.34 |
| 224738_x_at | <b>RPL7L1</b>            | 285855 ribosomal protein L7-like 1                                                                     | 3.30   | 0.02 |
| 200936_at   | <b>RPL8</b>              | 6132 ribosomal protein L8                                                                              | 2.46   | 0.06 |
| 213399_x_at | <b>RPN2</b>              | 6185 ribophorin II                                                                                     | 3.04   | 0.13 |
| 226131_s_at | <b>RPS16</b>             | 6217 ribosomal protein S16                                                                             | 2.38   | 0.08 |
| 213414_s_at | <b>RPS19</b>             | 6223 ribosomal protein S19                                                                             | 2.38   | 0.08 |
| 222487_s_at | <b>RPS27L</b>            | 51065 ribosomal protein S27-like                                                                       | 2.30   | 0.51 |
| 204633_s_at | <b>RPS6KA5</b>           | 9252 ribosomal protein S6 kinase, 90kDa, polypeptide 5                                                 | -3.99  | 0.25 |
| 220737_at   | <b>RPS6KA6</b>           | 27330 ribosomal protein S6 kinase, 90kDa, polypeptide 6 RNA pseudouridylate synthase domain containing | -2.79  | 0.34 |
| 225398_at   | <b>RPUSD4</b>            | 84881 4                                                                                                | 9.21   | 0.34 |
| 222514_at   | <b>RRAGC</b>             | 64121 Ras-related GTP binding C                                                                        | 2.66   | 0.00 |
| 223342_at   | <b>RRM2B</b>             | 50484 ribonucleotide reductase M2 B (TP53 inducible) RRN3 RNA polymerase I transcription factor        | -3.52  | 0.13 |
| 222204_s_at | <b>RRN3</b>              | 54700 homolog (S. cerevisiae) ribosomal RNA processing 15 homolog (S. cerevisiae)                      | 2.98   | 0.25 |
| 219037_at   | <b>RRP15</b>             | 51018 radical S-adenosyl methionine domain containing                                                  | 2.70   | 0.06 |
| 213797_at   | <b>RSAD2</b>             | 91543 2                                                                                                | 4.98   | 0.00 |
| 213694_at   | <b>RSBN1</b>             | 54665 round spermatid basic protein 1                                                                  | -2.42  | 0.51 |
| 226387_at   | <b>RSBN1L</b>            | 222194 round spermatid basic protein 1-like                                                            | -4.84  | 0.00 |
| 212018_s_at | <b>RSL1D1</b>            | 26156 ribosomal L1 domain containing 1                                                                 | 6.48   | 0.00 |
| 223713_at   | <b>RSPH3</b>             | 83861 radial spoke head 3 homolog (Chlamydomonas)                                                      | -3.39  | 0.13 |

|              |                 |                                                                                               |        |      |
|--------------|-----------------|-----------------------------------------------------------------------------------------------|--------|------|
| 34408_at     | <b>RTN2</b>     | 6253 reticulon 2                                                                              | 4.25   | 0.25 |
| 219549_s_at  | <b>RTN3</b>     | 10313 reticulon 3                                                                             | -3.67  | 0.00 |
| 219684_at    | <b>RTP4</b>     | 64108 receptor (chemosensory) transporter protein 4                                           | 7.72   | 0.08 |
| 210251_s_at  | <b>RUFY3</b>    | 22902 RUN and FYVE domain containing 3                                                        | 2.65   | 0.25 |
| 232231_at    | <b>RUNX2</b>    | 860 runt-related transcription factor 2                                                       | -10.89 | 0.13 |
| 204197_s_at  | <b>RUNX3</b>    | 864 runt-related transcription factor 3                                                       | 3.39   | 0.06 |
| 205087_at    | <b>RWDD3</b>    | 25950 RWD domain containing 3                                                                 | -2.18  | 0.34 |
| 209148_at    | <b>RXRβ</b>     | 6257 retinoid X receptor, beta                                                                | -4.11  | 0.00 |
| 212440_at    | <b>RY1</b>      | 11017 putative nucleic acid binding protein RY-1                                              | 5.13   | 0.00 |
| 203186_s_at  | <b>S100A4</b>   | 6275 S100 calcium binding protein A4                                                          | -6.00  | 0.00 |
| 217728_at    | <b>S100A6</b>   | 6277 S100 calcium binding protein A6                                                          | -3.75  | 0.03 |
| 203535_at    | <b>S100A9</b>   | 6280 S100 calcium binding protein A9                                                          | -2.06  | 0.00 |
| 204351_at    | <b>S100P</b>    | 6286 S100 calcium binding protein P                                                           | -3.05  | 0.00 |
| 217946_s_at  | <b>SAE1</b>     | 10055 SUMO1 activating enzyme subunit 1                                                       | 4.97   | 0.00 |
| 201177_s_at  | <b>SAE2</b>     | 10054 SUMO1 activating enzyme subunit 2                                                       | 6.29   | 0.25 |
| 226603_at    | <b>SAMD9L</b>   | 219285 sterile alpha motif domain containing 9-like                                           | 3.07   | 0.00 |
| 204502_at    | <b>SAMHD1</b>   | 25939 SAM domain and HD domain 1<br>SAM domain, SH3 domain and nuclear                        | 3.28   | 0.00 |
| 1555638_a_at | <b>SAMSN1</b>   | 64092 localization signals 1                                                                  | 7.73   | 0.00 |
| 210790_s_at  | <b>SAR1A</b>    | 56681 SAR1 gene homolog A (S. cerevisiae)                                                     | 2.40   | 0.25 |
| 1554482_a_at | <b>SAR1B</b>    | 51128 SAR1 gene homolog B (S. cerevisiae)                                                     | 5.82   | 0.00 |
| 209486_at    | <b>SAS10</b>    | 57050 disrupter of silencing 10                                                               | 3.79   | 0.06 |
| 225272_at    | <b>SAT2</b>     | 112483 spermidine/spermine N1-acetyltransferase 2                                             | 3.82   | 0.08 |
| 234491_s_at  | <b>SAV1</b>     | 60485 salvador homolog 1 (Drosophila)<br>Shwachman-Bodian-Diamond syndrome ///                | 3.01   | 0.02 |
| 222669_s_at  | <b>SBDS ///</b> | 155370 ///<br>Shwachman-Bodian-Diamond syndrome                                               |        |      |
| 209741_x_at  | <b>SBDSP</b>    | 51119 pseudogene                                                                              | 2.98   | 0.00 |
|              | <b>SCAPER</b>   | 49855 S phase cyclin A-associated protein in the ER                                           | 2.44   | 0.25 |
| 1554705_at   | <b>SCARA5</b>   | 286133 scavenger receptor class A, member 5 (putative)                                        | 2.95   | 0.02 |
| 201646_at    | <b>SCARB2</b>   | 950 scavenger receptor class B, member 2                                                      | 9.35   | 0.13 |
| 1555021_a_at | <b>SCARF1</b>   | 8578 scavenger receptor class F, member 1                                                     | 5.21   | 0.00 |
| 215548_s_at  | <b>SCFD1</b>    | 23256 sec1 family domain containing 1                                                         | 2.09   | 0.34 |
| 219196_at    | <b>SCG3</b>     | 29106 secretogranin III                                                                       | 7.87   | 0.34 |
| 1569495_at   | <b>SCLT1</b>    | 132320 sodium channel and clathrin linker 1                                                   | -4.77  | 0.34 |
| 218793_s_at  | <b>SCML1</b>    | 6322 sex comb on midleg-like 1 (Drosophila)<br>sodium channel, voltage-gated, type III, alpha | 2.82   | 0.25 |
| 232512_at    | <b>SCN3A</b>    | 6328 subunit<br>small inducible cytokine subfamily E, member 1                                | 2.10   | 0.51 |
| 202541_at    | <b>SCYE1</b>    | 9255 (endothelial monocyte-activating)                                                        | 3.28   | 0.08 |
| 41329_at     | <b>SCYL3</b>    | 57147 SCY1-like 3 (S. cerevisiae)                                                             | 2.08   | 0.16 |
| 212154_at    | <b>SDC2</b>     | 6383 syndecan 2                                                                               | 6.64   | 0.25 |
| 202071_at    | <b>SDC4</b>     | 6385 syndecan 4                                                                               | 12.00  | 0.00 |
| 1555495_a_at | <b>SDCCAG10</b> | 10283 serologically defined colon cancer antigen 10                                           | 2.30   | 0.51 |
| 227785_at    | <b>SDCCAG8</b>  | 10806 serologically defined colon cancer antigen 8                                            | 4.77   | 0.02 |
| 218681_s_at  | <b>SDF2L1</b>   | 23753 stromal cell-derived factor 2-like 1                                                    | 4.01   | 0.06 |
| 223299_at    | <b>SEC11C</b>   | 90701 SEC11 homolog C (S. cerevisiae)                                                         | 2.49   | 0.06 |
| 210293_s_at  | <b>SEC23B</b>   | 10483 Sec23 homolog B (S. cerevisiae)<br>SEC24 related gene family, member A (S.              | 4.58   | 0.06 |
| 212900_at    | <b>SEC24A</b>   | 10802 cerevisiae)<br>SEC24 related gene family, member D (S.                                  | 6.04   | 0.00 |
| 202375_at    | <b>SEC24D</b>   | 9871 cerevisiae)                                                                              | 2.03   | 0.79 |
| 200945_s_at  | <b>SEC31A</b>   | 22872 SEC31 homolog A (S. cerevisiae)                                                         | 5.98   | 0.25 |
| 203484_at    | <b>SEC61G</b>   | 23480 Sec61 gamma subunit                                                                     | 3.18   | 0.02 |
| 223225_s_at  | <b>SEH1L</b>    | 81929 SEH1-like (S. cerevisiae)                                                               | 14.67  | 0.02 |
| 1555274_a_at | <b>SELI</b>     | 85465 selenoprotein I                                                                         | 10.07  | 0.51 |
| 204563_at    | <b>SELL</b>     | 6402 selectin L (lymphocyte adhesion molecule 1)                                              | -7.75  | 0.00 |

|              |                  |                                                                                                          |       |      |
|--------------|------------------|----------------------------------------------------------------------------------------------------------|-------|------|
| 209879_at    | <b>SELPLG</b>    | 6404 selectin P ligand                                                                                   | -4.31 | 0.00 |
| 223209_s_at  | <b>SELS</b>      | 55829 selenoprotein S<br>sema domain, immunoglobulin domain (Ig),<br>transmembrane domain (TM) and short | 5.80  | 0.00 |
| 46665_at     | <b>SEMA4C</b>    | 54910 cytoplasmic domain, (semaphorin) 4C                                                                | 5.37  | 0.79 |
| 200961_at    | <b>SEPHS2</b>    | 22928 selenophosphate synthetase 2                                                                       | 2.52  | 0.00 |
| 208657_s_at  | <b>SEPT9</b>     | 10801 septin 9                                                                                           | -2.25 | 0.16 |
| 209669_s_at  | <b>SERBP1</b>    | 26135 SERPINE1 mRNA binding protein 1<br>serpin peptidase inhibitor, clade B (ovalbumin),                | 2.01  | 0.08 |
| 204614_at    | <b>SERPINB2</b>  | 5055 member 2<br>serpin peptidase inhibitor, clade B (ovalbumin),                                        | 11.59 | 0.00 |
| 211474_s_at  | <b>SERPINB6</b>  | 5269 member 6<br>serpin peptidase inhibitor, clade B (ovalbumin),                                        | 3.39  | 0.79 |
| 206034_at    | <b>SERPINB8</b>  | 5271 member 8<br>serpin peptidase inhibitor, clade B (ovalbumin),                                        | 8.09  | 0.00 |
| 209723_at    | <b>SERPINB9</b>  | 5272 member 9<br>serpin peptidase inhibitor, clade G (C1 inhibitor),                                     | 7.77  | 0.00 |
| 200986_at    | <b>SERPING1</b>  | 710 member 1, (angioedema, hereditary)                                                                   | 5.46  | 0.13 |
| 235684_s_at  | <b>SESN3</b>     | 143686 sestrin 3                                                                                         | -9.42 | 0.00 |
| 213153_at    | <b>SETD1B</b>    | 23067 SET domain containing 1B<br>SET domain containing (lysine methyltransferase)                       | -2.05 | 0.03 |
| 225118_at    | <b>SETD8</b>     | 387893 8                                                                                                 | -2.51 | 0.79 |
| 235339_at    | <b>SETDB2</b>    | 83852 SET domain, bifurcated 2                                                                           | 3.22  | 0.00 |
| 200687_s_at  | <b>SF3B3</b>     | 23450 splicing factor 3b, subunit 3, 130kDa                                                              | 3.41  | 0.16 |
| 227210_at    | <b>SFMBT2</b>    | 57713 Scm-like with four mbt domains 2<br>splicing factor, arginine/serine-rich 10 (transformer          | 7.35  | 0.06 |
| 200893_at    | <b>SFRS10</b>    | 6434 2 homolog, Drosophila)                                                                              | 3.35  | 0.16 |
| 214092_x_at  | <b>SFRS14</b>    | 10147 splicing factor, arginine/serine-rich 14<br>Splicing factor, arginine/serine-rich 2, interacting   | -2.08 | 0.25 |
| 235579_at    | <b>SFRS2IP</b>   | 9169 protein                                                                                             | 3.57  | 0.25 |
| 206108_s_at  | <b>SFRS6</b>     | 6431 splicing factor, arginine/serine-rich 6                                                             | 2.68  | 0.51 |
| 214141_x_at  | <b>SFRS7</b>     | 6432 splicing factor, arginine/serine-rich 7, 35kDa                                                      | 3.84  | 0.02 |
| 214838_at    | <b>SFT2D2</b>    | 375035 SFT2 domain containing 2                                                                          | 3.56  | 0.16 |
| 214354_x_at  | <b>SFTPB</b>     | 6439 surfactant, pulmonary-associated protein B<br>serum/glucocorticoid regulated kinase family,         | 4.85  | 0.00 |
| 220038_at    | <b>SGK3</b>      | 23678 member 3                                                                                           | 3.65  | 0.34 |
| 244780_at    | <b>SGPP2</b>     | 130367 sphingosine-1-phosphate phosphatase 2<br>small glutamine-rich tetratricopeptide repeat            | 21.70 | 0.51 |
| 228745_at    | <b>SGTB</b>      | 54557 (TPR)-containing, beta<br>SH2 domain protein 1A, Duncan's disease                                  | 4.99  | 0.00 |
| 210116_at    | <b>SH2D1A</b>    | 4068 (lymphoproliferative syndrome)                                                                      | 2.31  | 0.06 |
| 223265_at    | <b>SH3BP5L</b>   | 80851 SH3-binding domain protein 5-like                                                                  | -5.43 | 0.25 |
| 223082_at    | <b>SH3KBP1</b>   | 30011 SH3-domain kinase binding protein 1                                                                | -4.21 | 0.00 |
| 202276_at    | <b>SHFM1</b>     | 7979 split hand/foot malformation (ectrodactyly) type 1                                                  | 2.95  | 0.06 |
| 224846_at    | <b>SHKBP1</b>    | 92799 SH3KBP1 binding protein 1                                                                          | -3.13 | 0.07 |
| 209980_s_at  | <b>SHMT1</b>     | 6470 serine hydroxymethyltransferase 1 (soluble)                                                         | 2.59  | 0.02 |
| 210135_s_at  | <b>SHOX2</b>     | 6474 short stature homeobox 2                                                                            | 23.63 | 0.02 |
| 218765_at    | <b>SIDT2</b>     | 51092 SID1 transmembrane family, member 2                                                                | 2.56  | 0.25 |
| 44673_at     | <b>SIGLEC1</b>   | 6614 sialic acid binding Ig-like lectin 1, sialoadhesin                                                  | 4.85  | 0.34 |
| 1552807_a_at | <b>SIGLEC10</b>  | 89790 sialic acid binding Ig-like lectin 10                                                              | -4.06 | 0.13 |
| 1561880_a_at | <b>SIGLECP16</b> | 400709 sialic acid binding Ig-like lectin, pseudogene 16                                                 | 3.66  | 0.51 |
| 206934_at    | <b>SIRPB1</b>    | 10326 signal-regulatory protein beta 1                                                                   | -4.50 | 0.00 |
| 1559034_at   | <b>SIRPB2</b>    | 284759 signal-regulatory protein beta 2                                                                  | -5.96 | 0.07 |
| 232891_at    | <b>SIRPD</b>     | 128646 signal-regulatory protein delta<br>sirtuin (silent mating type information regulation 2           | -3.05 | 0.51 |
| 233179_x_at  | <b>SIRT6</b>     | 51548 homolog) 6 ( <i>S. cerevisiae</i> )                                                                | 4.36  | 0.79 |
| 232379_at    | <b>SKIL</b>      | 6498 SKI-like oncogene                                                                                   | 4.75  | 0.00 |

|              |                  | signaling lymphocytic activation molecule family                                                       |        |      |
|--------------|------------------|--------------------------------------------------------------------------------------------------------|--------|------|
| 206181_at    | <b>SLAMF1</b>    | 6504 member 1                                                                                          | 5.47   | 0.79 |
| 219159_s_at  | <b>SLAMF7</b>    | 57823 SLAM family member 7                                                                             | 71.81  | 0.00 |
| 219386_s_at  | <b>SLAMF8</b>    | 56833 SLAM family member 8                                                                             | 115.80 | 0.00 |
| 1553769_at   | <b>SLAMF9</b>    | 89886 SLAM family member 9                                                                             | 2.26   | 0.79 |
| 203124_s_at  | <b>SLC11A2</b>   | 4891 metal ion transporters), member 2<br>solute carrier family 11 (proton-coupled divalent            | 45.12  | 0.00 |
| 220371_s_at  | <b>SLC12A9</b>   | 56996 transporters), member 9<br>solute carrier family 12 (potassium/chloride                          | -10.53 | 0.00 |
| 209900_s_at  | <b>SLC16A1</b>   | 6566 (monocarboxylic acid transporter 1)<br>solute carrier family 16, member 1                         | 7.68   | 0.00 |
| 206600_s_at  | <b>SLC16A5</b>   | 9121 (monocarboxylic acid transporter 6)<br>solute carrier family 16, member 5                         | -2.50  | 0.13 |
| 211576_s_at  | <b>SLC19A1</b>   | 6573 member 1<br>solute carrier family 19 (folate transporter),                                        | -3.69  | 0.25 |
| 209611_s_at  | <b>SLC1A4</b>    | 6509 acid transporter), member 4<br>solute carrier family 1 (glutamate/neutral amino                   | 2.53   | 0.34 |
| 208916_at    | <b>SLC1A5</b>    | 6510 transporter), member 5<br>solute carrier family 1 (neutral amino acid                             | 3.13   | 0.00 |
| 201920_at    | <b>SLC20A1</b>   | 6574 member 1<br>solute carrier family 20 (phosphate transporter),                                     | 2.04   | 0.00 |
| 228497_at    | <b>SLC22A15</b>  | 55356 transporter), member 15<br>solute carrier family 22 (organic cation                              | -4.20  | 0.34 |
| 206097_at    | <b>SLC22A18A</b> | 5003 transporter), member 18 antisense<br>solute carrier family 22 (organic cation                     | 4.90   | 0.13 |
| 205896_at    | <b>SLC22A4</b>   | 6583 transporter), member 4<br>solute carrier family 24                                                | -7.53  | 0.16 |
| 243969_at    | <b>SLC24A4</b>   | 123041 4<br>(sodium/potassium/calcium exchanger), member                                               | -13.00 | 0.25 |
| 203340_s_at  | <b>SLC25A12</b>  | 8604 Aralar), member 12<br>solute carrier family 25 (mitochondrial carrier,                            | 2.84   | 0.79 |
| 203775_at    | <b>SLC25A13</b>  | 10165 solute carrier family 25, member 13 (citrin)<br>solute carrier family 25 (mitochondrial carrier: | 29.58  | 0.00 |
| 218725_at    | <b>SLC25A22</b>  | 79751 glutamate), member 22<br>solute carrier family 25 (mitochondrial carrier;                        | 2.53   | 0.51 |
| 225212_at    | <b>SLC25A25</b>  | 114789 phosphate carrier), member 25                                                                   | 2.14   | 0.51 |
| 223192_at    | <b>SLC25A28</b>  | 81894 solute carrier family 25, member 28                                                              | 2.84   | 0.25 |
| 216721_at    | <b>SLC25A30</b>  | 253512 Solute carrier family 25, member 30                                                             | 4.98   | 0.08 |
| 221020_s_at  | <b>SLC25A32</b>  | 81034 solute carrier family 25, member 32                                                              | 6.50   | 0.51 |
| 223296_at    | <b>SLC25A33</b>  | 84275 solute carrier family 25, member 33                                                              | 49.82  | 0.00 |
| 242335_at    | <b>SLC25A37</b>  | 51312 solute carrier family 25, member 37<br>solute carrier family 25 (mitochondrial carrier;          | -3.35  | 0.00 |
| 200657_at    | <b>SLC25A5</b>   | 292 adenine nucleotide translocator), member 5<br>solute carrier family 25 (mitochondrial carrier;     | 2.96   | 0.06 |
| 212085_at    | <b>SLC25A6</b>   | 293 adenine nucleotide translocator), member 6                                                         | 3.62   | 0.06 |
| 226679_at    | <b>SLC26A11</b>  | 284129 solute carrier family 26, member 11<br>solute carrier family 26 (sulfate transporter),          | 8.20   | 0.02 |
| 224963_at    | <b>SLC26A2</b>   | 1836 member 2<br>solute carrier family 29 (nucleoside transporters),                                   | 2.24   | 0.08 |
| 201802_at    | <b>SLC29A1</b>   | 2030 member 1<br>solute carrier family 2 (facilitated glucose                                          | -3.44  | 0.16 |
| 201250_s_at  | <b>SLC2A1</b>    | 6513 transporter), member 1                                                                            | -4.65  | 0.51 |
| 1555500_s_at | <b>SLC2A4RG</b>  | 56731 SLC2A4 regulator<br>solute carrier family 30 (zinc transporter), member                          | 5.85   | 0.25 |
| 207035_at    | <b>SLC30A3</b>   | 7781 3<br>solute carrier family 30 (zinc transporter), member                                          | -4.47  | 0.13 |
| 207362_at    | <b>SLC30A4</b>   | 7782 4<br>solute carrier family 30 (zinc transporter), member                                          | 3.78   | 0.00 |
| 226601_at    | <b>SLC30A7</b>   | 148867 7                                                                                               | 4.58   | 0.06 |



|              |                 |                                                     |        |      |
|--------------|-----------------|-----------------------------------------------------|--------|------|
|              |                 | solute carrier family 31 (copper transporters),     |        |      |
| 203971_at    | <b>SLC31A1</b>  | 1317 member 1                                       | 3.28   | 0.16 |
| 202433_at    | <b>SLC35B1</b>  | 10237 solute carrier family 35, member B1           | 3.13   | 0.13 |
| 224716_at    | <b>SLC35B2</b>  | 347734 solute carrier family 35, member B2          | 6.86   | 0.06 |
| 225881_at    | <b>SLC35B4</b>  | 84912 solute carrier family 35, member B4           | 6.71   | 0.02 |
| 225037_at    | <b>SLC35C2</b>  | 51006 solute carrier family 35, member C2           | 2.01   | 0.25 |
|              |                 | solute carrier family 36 (proton/amino acid         |        |      |
| 234978_at    | <b>SLC36A4</b>  | 120103 symporter), member 4                         | 4.05   | 0.79 |
|              |                 | solute carrier family 37 (glycerol-3-phosphate      |        |      |
| 218928_s_at  | <b>SLC37A1</b>  | 54020 transporter), member 1                        | 2.49   | 0.25 |
|              |                 | solute carrier family 37 (glycerol-3-phosphate      |        |      |
| 223304_at    | <b>SLC37A3</b>  | 84255 transporter), member 3                        | -6.45  | 0.00 |
|              |                 | solute carrier family 39 (zinc transporter), member |        |      |
| 202088_at    | <b>SLC39A6</b>  | 25800 6                                             | 2.29   | 0.13 |
|              |                 | solute carrier family 39 (zinc transporter), member |        |      |
| 209267_s_at  | <b>SLC39A8</b>  | 64116 8                                             | 25.96  | 0.00 |
|              |                 | solute carrier family 3 (activators of dibasic and  |        |      |
| 200924_s_at  | <b>SLC3A2</b>   | 6520 neutral amino acid transport), member 2        | 4.34   | 0.06 |
|              |                 | solute carrier family 40 (iron-regulated            |        |      |
| 223044_at    | <b>SLC40A1</b>  | 30061 transporter), member 1                        | -71.53 | 0.00 |
| 223798_at    | <b>SLC41A2</b>  | 84102 solute carrier family 41, member 2            | 18.72  | 0.16 |
| 210692_s_at  | <b>SLC43A3</b>  | 29015 solute carrier family 43, member 3            | 94.83  | 0.00 |
| 228485_s_at  | <b>SLC44A1</b>  | 23446 solute carrier family 44, member 1            | 3.41   | 0.00 |
| 224609_at    | <b>SLC44A2</b>  | 57153 solute carrier family 44, member 2            | -14.52 | 0.00 |
| 225598_at    | <b>SLC45A4</b>  | 57210 solute carrier family 45, member 4            | -6.46  | 0.03 |
| 214719_at    | <b>SLC46A3</b>  | 283537 solute carrier family 46, member 3           | -9.28  | 0.08 |
|              |                 | solute carrier family 4, anion exchanger, member    |        |      |
| 202111_at    | <b>SLC4A2</b>   | 6522 2 (erythrocyte membrane protein band 3-like 1) | 8.50   | 0.00 |
|              |                 | Solute carrier family 4, sodium bicarbonate         |        |      |
| 234976_x_at  | <b>SLC4A5</b>   | 57835 cotransporter, member 5                       | 10.15  | 0.13 |
|              |                 | solute carrier family 4, sodium bicarbonate         |        |      |
| 210286_s_at  | <b>SLC4A7</b>   | 9497 cotransporter, member 7                        | 2.84   | 0.16 |
|              |                 | solute carrier family 5 (inositol transporters),    |        |      |
| 213167_s_at  | <b>SLC5A3</b>   | 6526 member 3                                       | 4.74   | 0.00 |
|              |                 | solute carrier family 7 (cationic amino acid        |        |      |
| 212290_at    | <b>SLC7A1</b>   | 6541 transporter, y+ system), member 1              | 3.49   | 0.34 |
|              |                 | solute carrier family 7, (cationic amino acid       |        |      |
| 209921_at    | <b>SLC7A11</b>  | 23657 transporter, y+ system) member 11             | 15.73  | 0.00 |
|              |                 | solute carrier family 7 (cationic amino acid        |        |      |
| 201195_s_at  | <b>SLC7A5</b>   | 8140 transporter, y+ system), member 5              | 3.87   | 0.25 |
|              |                 | solute carrier family 9 (sodium/hydrogen            |        |      |
| 201349_at    | <b>SLC9A3R1</b> | 9368 exchanger), member 3 regulator 1               | -7.71  | 0.16 |
|              |                 | solute carrier organic anion transporter family,    |        |      |
| 203473_at    | <b>SLCO2B1</b>  | 11309 member 2B1                                    | 7.60   | 0.34 |
|              |                 | solute carrier organic anion transporter family,    |        |      |
| 210542_s_at  | <b>SLCO3A1</b>  | 28232 member 3A1                                    | -3.00  | 0.25 |
|              |                 | solute carrier organic anion transporter family,    |        |      |
| 222071_s_at  | <b>SLCO4C1</b>  | 353189 member 4C1                                   | -4.07  | 0.07 |
| 226743_at    | <b>SLFN11</b>   | 91607 schlafen family member 11                     | 6.96   | 0.00 |
| 1553055_a_at | <b>SLFN5</b>    | 162394 schlafen family member 5                     | 7.70   | 0.00 |
| 225243_s_at  | <b>SLMAP</b>    | 7871 sarcolemma associated protein                  | -2.36  | 0.07 |
| 222441_x_at  | <b>SLMO2</b>    | 51012 slowmo homolog 2 (Drosophila)                 | 2.24   | 0.00 |
| 203021_at    | <b>SLPI</b>     | 6590 secretory leukocyte peptidase inhibitor        | 4.31   | 0.00 |
| 238446_at    | <b>SMA4</b>     | 11039 Glucuronidase, beta pseudogene                | -6.46  | 0.03 |
|              | <b>SMA4 ///</b> | 11039 ///                                           |        |      |
| 215043_s_at  | <b>SMA5</b>     | 11042 glucuronidase, beta pseudogene                | -3.53  | 0.07 |
| 205398_s_at  | <b>SMAD3</b>    | 4088 SMAD family member 3                           | 9.12   | 0.00 |
| 202527_s_at  | <b>SMAD4</b>    | 4089 SMAD family member 4                           | -2.96  | 0.16 |
| 225282_at    | <b>SMAP1L</b>   | 64744 stromal membrane-associated protein 1-like    | -2.85  | 0.00 |

|              |                           |                  |                                                                                                                                      |        |      |
|--------------|---------------------------|------------------|--------------------------------------------------------------------------------------------------------------------------------------|--------|------|
| 206542_s_at  | <b>SMARCA2</b>            | 6595             | SWI/SNF related, matrix associated, actin dependent regulator of chromatin, subfamily a, member 2                                    | -5.08  | 0.00 |
| 208793_x_at  | <b>SMARCA4</b>            | 6597             | SWI/SNF related, matrix associated, actin dependent regulator of chromatin, subfamily a, member 4                                    | 3.09   | 0.02 |
| 204240_s_at  | <b>SMC2</b>               | 10592            | structural maintenance of chromosomes 2 structural maintenance of chromosomes flexible                                               | 2.44   | 0.16 |
| 1558747_at   | <b>SMCHD1</b>             | 23347            | hinge domain containing 1                                                                                                            | -2.35  | 0.00 |
| 210057_at    | <b>SMG1</b>               | 23049            | PI-3-kinase-related kinase SMG-1 sphingomyelin phosphodiesterase 1, acid                                                             | 3.74   | 0.02 |
| 209420_s_at  | <b>SMPD1</b>              | 6609             | lysosomal (acid sphingomyelinase) sphingomyelin phosphodiesterase 2, neutral                                                         | 3.59   | 0.00 |
| 205622_at    | <b>SMPD2</b>              | 6610             | membrane (neutral sphingomyelinase)                                                                                                  | 2.02   | 0.02 |
| 230367_at    | <b>SMTNL1</b>             | 219537           | smoothelin-like 1                                                                                                                    | 2.99   | 0.00 |
| 227489_at    | <b>SMURF2</b>             | 64750            | SMAD specific E3 ubiquitin protein ligase 2                                                                                          | -4.92  | 0.16 |
| 226683_at    | <b>SNAG1</b>              | 112574           | Sorting nexin associated golgi protein 1 small nuclear RNA activating complex,                                                       | -6.58  | 0.00 |
| 205443_at    | <b>SNAPC1</b>             | 6617             | polypeptide 1, 43kDa staphylococcal nuclease and tudor domain                                                                        | 10.53  | 0.00 |
| 201622_at    | <b>SND1</b>               | 27044            | containing 1 SNF8, ESCRT-II complex subunit, homolog (S.                                                                             | 8.06   | 0.06 |
| 218391_at    | <b>SNF8</b>               | 11267            | cerevisiae)                                                                                                                          | 2.37   | 0.02 |
| 220358_at    | <b>SNFT</b>               | 55509            | Jun dimerization protein p21SNFT small nucleolar RNA host gene (non-protein                                                          | 14.20  | 0.00 |
| 1564906_at   | <b>SNHG4</b>              | 724102           | coding) 4 small nucleolar RNA host gene (non-protein                                                                                 | 3.23   | 0.00 |
| 225155_at    | <b>SNHG5</b>              | 387066           | coding) 5                                                                                                                            | 2.43   | 0.34 |
| 244669_at    | <b>SNHG5 /// SNORD50A</b> | 26799 /// 387066 | small nucleolar RNA, C/D box 50A /// small nucleolar RNA host gene (non-protein coding) 5 small nucleolar RNA host gene (non-protein | 2.75   | 0.51 |
| 225220_at    | <b>SNHG8</b>              | 1E+08            | coding) 8                                                                                                                            | 4.46   | 0.02 |
| 206055_s_at  | <b>SNRPA1</b>             | 6627             | small nuclear ribonucleoprotein polypeptide A' small nuclear ribonucleoprotein D1 polypeptide                                        | 7.77   | 0.25 |
| 202690_s_at  | <b>SNRPD1</b>             | 6632             | 16kDa small nuclear ribonucleoprotein D2 polypeptide                                                                                 | 5.62   | 0.00 |
| 200826_at    | <b>SNRPD2</b>             | 6633             | 16.5kDa                                                                                                                              | 4.40   | 0.08 |
| 203832_at    | <b>SNRPF</b>              | 6636             | small nuclear ribonucleoprotein polypeptide F                                                                                        | 5.96   | 0.08 |
| 1559343_at   | <b>SNRPN</b>              | 6638             | Small nuclear ribonucleoprotein polypeptide N                                                                                        | 3.32   | 0.51 |
| 224684_at    | <b>SNX12</b>              | 29934            | sorting nexin 12                                                                                                                     | 2.34   | 0.34 |
| 229980_s_at  | <b>SNX5</b>               | 27131            | sorting nexin 5                                                                                                                      | 3.62   | 0.16 |
| 223028_s_at  | <b>SNX9</b>               | 51429            | sorting nexin 9 sterol O-acyltransferase (acyl-Coenzyme A:                                                                           | 5.26   | 0.02 |
| 244661_at    | <b>SOAT1</b>              | 6646             | cholesterol acyltransferase) 1                                                                                                       | -2.58  | 0.51 |
| 210001_s_at  | <b>SOCS1</b>              | 8651             | suppressor of cytokine signaling 1                                                                                                   | 60.61  | 0.00 |
| 201563_at    | <b>SORD</b>               | 6652             | sorbitol dehydrogenase sortilin-related receptor, L(DLR class) A repeats-                                                            | -4.30  | 0.13 |
| 230707_at    | <b>SORL1</b>              | 6653             | containing                                                                                                                           | -17.56 | 0.00 |
| 212807_s_at  | <b>SORT1</b>              | 6272             | sortilin 1                                                                                                                           | 2.68   | 0.16 |
| 217644_s_at  | <b>SOS2</b>               | 6655             | son of sevenless homolog 2 (Drosophila)                                                                                              | -8.29  | 0.00 |
| 213721_at    | <b>SOX2</b>               | 6657             | SRY (sex determining region Y)-box 2                                                                                                 | 2.40   | 0.13 |
| 224760_at    | <b>SP1</b>                | 6667             | Sp1 transcription factor                                                                                                             | -3.11  | 0.00 |
| 207777_s_at  | <b>SP140</b>              | 11262            | SP140 nuclear body protein                                                                                                           | 3.01   | 0.06 |
| 236265_at    | <b>SP4</b>                | 6671             | Sp4 transcription factor                                                                                                             | 2.20   | 0.51 |
| 210117_at    | <b>SPAG1</b>              | 6674             | sperm associated antigen 1                                                                                                           | -5.56  | 0.07 |
| 1553579_a_at | <b>SPAG11B</b>            | 10407            | sperm associated antigen 11B                                                                                                         | 2.19   | 0.25 |
| 221057_at    | <b>SPATA1</b>             | 64173            | spermatogenesis associated 1                                                                                                         | -4.09  | 0.13 |
| 225564_at    | <b>SPATA13</b>            | 221178           | spermatogenesis associated 13                                                                                                        | -3.32  | 0.51 |

|             |                        |                                                                                                                             |        |      |
|-------------|------------------------|-----------------------------------------------------------------------------------------------------------------------------|--------|------|
| 218164_at   | <b>SPATA20</b>         | 64847 spermatogenesis associated 20                                                                                         | 2.34   | 0.08 |
| 220298_s_at | <b>SPATA6</b>          | 54558 spermatogenesis associated 6                                                                                          | -2.22  | 0.16 |
| 238262_at   | <b>SPDYA</b>           | 245711 speedy homolog A (Drosophila)<br>sperm antigen with calponin homology and coiled-                                    | 2.42   | 0.06 |
| 244461_at   | <b>SPECC1</b>          | 92521 coil domains 1<br>sphen homolog, transcriptional regulator                                                            | -6.70  | 0.00 |
| 201997_s_at | <b>SPEN</b>            | 23013 (Drosophila)                                                                                                          | -3.49  | 0.13 |
| 212526_at   | <b>SPG20</b>           | 23111 spastic paraplegia 20 (Troyer syndrome)                                                                               | 5.42   | 0.00 |
| 219257_s_at | <b>SPHK1</b>           | 8877 sphingosine kinase 1                                                                                                   | 49.30  | 0.06 |
| 222431_at   | <b>SPIN1</b>           | 10927 spindlin 1                                                                                                            | 3.98   | 0.79 |
| 206239_s_at | <b>SPINK1</b>          | 6690 serine peptidase inhibitor, Kazal type 1<br>serine peptidase inhibitor-like, with Kunitz and                           | 23.64  | 0.02 |
| 206318_at   | <b>SPINLW1</b>         | 57119 WAP domains 1 (eppin)                                                                                                 | 2.88   | 0.25 |
| 210715_s_at | <b>SPINT2</b>          | 10653 serine peptidase inhibitor, Kunitz type, 2                                                                            | 5.82   | 0.00 |
| 223173_at   | <b>SPNS1</b>           | 83985 spinster homolog 1 (Drosophila)<br>secreted phosphoprotein 1 (osteopontin, bone                                       | 13.12  | 0.08 |
| 209875_s_at | <b>SPP1</b>            | 6696 sialoprotein I, early T-lymphocyte activation 1)                                                                       | 13.15  | 0.00 |
| 226353_at   | <b>SPPL2A</b>          | 84888 signal peptide peptidase-like 2A<br>sepiapterin reductase (7,8-                                                       | 3.85   | 0.00 |
| 203458_at   | <b>SPR</b>             | 6697 dihydrobiopterin:NADP+ oxidoreductase)                                                                                 | 7.32   | 0.25 |
| 226837_at   | <b>SPRED1</b>          | 161742 sprouty-related, EVH1 domain containing 1<br>splA/ryanodine receptor domain and SOCS box                             | 42.35  | 0.79 |
| 46256_at    | <b>SPSB3</b>           | 90864 containing 3<br>serine palmitoyltransferase, long chain base                                                          | -3.63  | 0.00 |
| 202277_at   | <b>SPTLC1</b>          | 10558 subunit 1<br>serine palmitoyltransferase, long chain base                                                             | 2.46   | 0.51 |
| 203128_at   | <b>SPTLC2</b>          | 9517 subunit 2                                                                                                              | -4.12  | 0.03 |
| 201471_s_at | <b>SQSTM1</b>          | 8878 sequestosome 1                                                                                                         | 4.31   | 0.00 |
| 219055_at   | <b>SRBD1</b>           | 55133 S1 RNA binding domain 1<br>v-src sarcoma (Schmidt-Ruppin A-2) viral                                                   | 2.43   | 0.16 |
| 213324_at   | <b>SRC</b>             | 6714 oncogene homolog (avian)                                                                                               | 14.96  | 0.08 |
| 208095_s_at | <b>SRP72</b>           | 6731 signal recognition particle 72kDa                                                                                      | 8.55   | 0.08 |
| 202200_s_at | <b>SRPK1</b>           | 6732 SFRS protein kinase 1                                                                                                  | -7.76  | 0.00 |
| 203182_s_at | <b>SRPK2</b>           | 6733 SFRS protein kinase 2                                                                                                  | -6.86  | 0.00 |
| 201138_s_at | <b>SSB</b>             | 6741 Sjogren syndrome antigen B (autoantigen La)                                                                            | 4.46   | 0.00 |
| 202591_s_at | <b>SSBP1</b>           | 6742 single-stranded DNA binding protein 1                                                                                  | 4.88   | 0.02 |
| 203787_at   | <b>SSBP2</b>           | 23635 single-stranded DNA binding protein 2                                                                                 | -3.74  | 0.79 |
| 221752_at   | <b>SSH1</b>            | 54434 Slingshot homolog 1 (Drosophila)                                                                                      | -4.13  | 0.25 |
| 226080_at   | <b>SSH2</b>            | 85464 slingshot homolog 2 (Drosophila)<br>signal sequence receptor, beta (translocon-                                       | -9.30  | 0.00 |
| 200652_at   | <b>SSR2</b>            | 6746 associated protein beta)<br>signal sequence receptor, gamma (translocon-                                               | 2.15   | 0.06 |
| 222411_s_at | <b>SSR3</b>            | 6747 associated protein gamma)<br>suppression of tumorigenicity 13 (colon                                                   | 2.35   | 0.25 |
| 207040_s_at | <b>ST13</b>            | 6767 carcinoma) (Hsp70 interacting protein)<br>suppression of tumorigenicity 18 (breast                                     | 4.54   | 0.00 |
| 206135_at   | <b>ST18</b>            | 9705 carcinoma) (zinc finger protein)                                                                                       | 2.14   | 0.34 |
| 203759_at   | <b>ST3GAL4</b>         | 6484 ST3 beta-galactoside alpha-2,3-sialyltransferase 4                                                                     | -3.51  | 0.51 |
| 203217_s_at | <b>ST3GAL5</b>         | 8869 ST3 beta-galactoside alpha-2,3-sialyltransferase 5                                                                     | 7.84   | 0.00 |
| 204542_at   | <b>ST6GALNAC<br/>2</b> | 10610 ST6 (alpha-N-acetyl-neuraminyl-2,3-beta-<br>galactosyl-1,3)-N-acetylgalactosaminide alpha-2,6-<br>sialyltransferase 2 | -10.47 | 0.00 |
| 206925_at   | <b>ST8SIA4</b>         | 7903 ST8 alpha-N-acetyl-neuraminide alpha-2,8-<br>sialyltransferase 4                                                       | -3.08  | 0.00 |
| 213820_s_at | <b>STARD5</b>          | 80765 StAR-related lipid transfer (START) domain<br>containing 5                                                            | -8.77  | 0.16 |

|             |                                      |                                                                                                                                                             |        |      |
|-------------|--------------------------------------|-------------------------------------------------------------------------------------------------------------------------------------------------------------|--------|------|
| 200028_s_at | <b>STARD7</b>                        | 56910 StAR-related lipid transfer (START) domain containing 7                                                                                               | 2.31   | 0.06 |
| 206868_at   | <b>STARD8</b>                        | 9754 StAR-related lipid transfer (START) domain containing 8                                                                                                | 4.51   | 0.08 |
| 200887_s_at | <b>STAT1</b>                         | 6772 91kDa signal transducer and activator of transcription 1,                                                                                              | 2.28   | 0.00 |
| 225636_at   | <b>STAT2</b>                         | 6773 113kDa signal transducer and activator of transcription 2,                                                                                             | 2.03   | 0.00 |
| 206118_at   | <b>STAT4</b>                         | 6775 signal transducer and activator of transcription 4                                                                                                     | 12.58  | 0.16 |
| 205026_at   | <b>STAT5B</b>                        | 6777 signal transducer and activator of transcription 5B stress 70 protein chaperone, microsomes-                                                           | -7.52  | 0.00 |
| 202557_at   | <b>STCH</b>                          | 6782 associated, 60kDa                                                                                                                                      | 12.71  | 0.00 |
| 202764_at   | <b>STIM1</b>                         | 6786 stromal interaction molecule 1 stress-induced-phosphoprotein 1 (Hsp70/Hsp90-                                                                           | -2.17  | 0.51 |
| 213330_s_at | <b>STIP1</b>                         | 10963 organizing protein)                                                                                                                                   | 2.92   | 0.79 |
| 202695_s_at | <b>STK17A</b>                        | 9263 serine/threonine kinase 17a                                                                                                                            | -5.43  | 0.13 |
| 205214_at   | <b>STK17B</b>                        | 9262 serine/threonine kinase 17b                                                                                                                            | -4.48  | 0.00 |
| 204068_at   | <b>STK3</b>                          | 6788 serine/threonine kinase 3 (STE20 homolog, yeast)                                                                                                       | 3.03   | 0.00 |
| 212572_at   | <b>STK38L</b>                        | 23012 serine/threonine kinase 38 like                                                                                                                       | -3.35  | 0.13 |
| 223746_at   | <b>STK4</b>                          | 6789 serine/threonine kinase 4                                                                                                                              | -2.91  | 0.13 |
| 201061_s_at | <b>STOM</b>                          | 2040 stomatin                                                                                                                                               | 6.07   | 0.00 |
| 33736_at    | <b>STOML1</b>                        | 9399 stomatin (EPB72)-like 1 Serine/threonine kinase receptor associated                                                                                    | 2.27   | 0.06 |
| 1558002_at  | <b>STRAP</b>                         | 11171 protein                                                                                                                                               | -4.63  | 0.03 |
| 205520_at   | <b>STRN</b>                          | 6801 striatin, calmodulin binding protein STT3, subunit of the oligosaccharyltransferase                                                                    | -3.61  | 0.00 |
| 202223_at   | <b>STT3A</b>                         | 3703 complex, homolog A ( <i>S. cerevisiae</i> )                                                                                                            | 3.45   | 0.34 |
| 212625_at   | <b>STX10</b>                         | 8677 syntaxin 10                                                                                                                                            | -4.53  | 0.25 |
| 212112_s_at | <b>STX12</b>                         | 23673 syntaxin 12                                                                                                                                           | 2.08   | 0.08 |
| 221499_s_at | <b>STX16</b>                         | 8675 syntaxin 16                                                                                                                                            | -5.41  | 0.00 |
| 203530_s_at | <b>STX4</b>                          | 6810 syntaxin 4                                                                                                                                             | 3.17   | 0.00 |
| 230560_at   | <b>STXBP6</b>                        | 29091 syntaxin binding protein 6 (amisyn) SGT1, suppressor of G2 allele of SKP1 ( <i>S.</i>                                                                 | 2.24   | 0.79 |
| 224309_s_at | <b>SUGT1</b>                         | 10910 <i>cerevisiae</i> )                                                                                                                                   | 2.19   | 0.16 |
| 224724_at   | <b>SULF2</b>                         | 55959 sulfatase 2 sulfotransferase family, cytosolic, 1A, phenol-                                                                                           | -7.80  | 0.00 |
| 203615_x_at | <b>SULT1A1</b>                       | 6817 preferring, member 1 sulfotransferase family, cytosolic, 1A, phenol-                                                                                   | -7.29  | 0.03 |
| 211385_x_at | <b>SULT1A2</b>                       | 6799 preferring, member 2 sulfotransferase family, cytosolic, 1A, phenol-                                                                                   | -7.10  | 0.08 |
| 209607_x_at | <b>SULT1A3</b> ///<br><b>SULT1A4</b> | 445329 /// 6818 sulfotransferase family, cytosolic, 1A, phenol-preferring, member 3 /// sulfotransferase family, cytosolic, 1A, phenol-preferring, member 4 | -4.10  | 0.07 |
| 207601_at   | <b>SULT1B1</b>                       | 27284 sulfotransferase family, cytosolic, 1B, member 1                                                                                                      | -9.05  | 0.16 |
| 222979_s_at | <b>SURF4</b>                         | 6836 surfeit 4 suppressor of variegation 4-20 homolog 1                                                                                                     | 3.22   | 0.06 |
| 222759_at   | <b>SUV420H1</b>                      | 51111 ( <i>Drosophila</i> )                                                                                                                                 | -2.06  | 0.25 |
| 202565_s_at | <b>SVIL</b>                          | 6840 supervillin                                                                                                                                            | -2.99  | 0.03 |
| 226068_at   | <b>SYK</b>                           | 6850 spleen tyrosine kinase synaptotagmin binding, cytoplasmic RNA                                                                                          | -3.15  | 0.00 |
| 217834_s_at | <b>SYNCRIP</b>                       | 10492 interacting protein                                                                                                                                   | 3.27   | 0.02 |
| 209447_at   | <b>SYNE1</b>                         | 23345 spectrin repeat containing, nuclear envelope 1                                                                                                        | -10.12 | 0.07 |
| 1558392_at  | <b>SYNE2</b>                         | 23224 spectrin repeat containing, nuclear envelope 2                                                                                                        | -8.54  | 0.03 |
| 225895_at   | <b>SYNPO2</b>                        | 171024 synaptopodin 2                                                                                                                                       | 3.53   | 0.16 |
| 243313_at   | <b>SYNPO2L</b>                       | 79933 synaptopodin 2-like                                                                                                                                   | 2.10   | 0.02 |

|              |                   |                                                            |        |      |
|--------------|-------------------|------------------------------------------------------------|--------|------|
|              |                   | SYS1 Golgi-localized integral membrane protein             |        |      |
| 224669_at    | <b>SYS1</b>       | 90196 homolog (S. cerevisiae)                              | 3.26   | 0.02 |
| 1560879_a_at | <b>SYT15</b>      | 83849 synaptotagmin XV                                     | 2.29   | 0.06 |
| 1555053_at   | <b>SYT9</b>       | 143425 synaptotagmin IX                                    | -2.18  | 0.51 |
| 238423_at    | <b>SYTL3</b>      | 94120 synaptotagmin-like 3                                 | -3.16  | 0.13 |
|              |                   | transforming, acidic coiled-coil containing protein        |        |      |
| 217437_s_at  | <b>TACC1</b>      | 6867 1                                                     | -2.33  | 0.13 |
|              |                   | transforming, acidic coiled-coil containing protein        |        |      |
| 218308_at    | <b>TACC3</b>      | 10460 3                                                    | -9.19  | 0.00 |
|              |                   | TAF13 RNA polymerase II, TATA box binding                  |        |      |
| 205966_at    | <b>TAF13</b>      | 6884 protein (TBP)-associated factor, 18kDa                | 3.42   | 0.00 |
|              |                   | TAF3 RNA polymerase II, TATA box binding                   |        |      |
| 235154_at    | <b>TAF3</b>       | 83860 protein (TBP)-associated factor, 140kDa              | 2.48   | 0.16 |
|              |                   | TAF4 RNA polymerase II, TATA box binding                   |        |      |
| 213090_s_at  | <b>TAF4</b>       | 6874 protein (TBP)-associated factor, 135kDa               | -4.33  | 0.51 |
|              |                   | TAF9 RNA polymerase II, TATA box binding                   |        |      |
| 203893_at    | <b>TAF9</b>       | 6880 protein (TBP)-associated factor, 32kDa                | 10.52  | 0.00 |
| 1555724_s_at | <b>TAGLN</b>      | 6876 transgelin                                            | 2.32   | 0.06 |
| 210978_s_at  | <b>TAGLN2</b>     | 8407 transgelin 2                                          | -3.39  | 0.00 |
|              |                   | tetratricopeptide repeat, ankyrin repeat and coiled-       |        |      |
| 225308_s_at  | <b>TANC1</b>      | 85461 coil containing 1                                    | -2.09  | 0.25 |
| 210458_s_at  | <b>TANK</b>       | 10010 TRAF family member-associated NFKB activator         | 2.12   | 0.00 |
|              |                   | transporter 2, ATP-binding cassette, sub-family B          |        |      |
| 204770_at    | <b>TAP2</b>       | 6891 (MDR/TAP)                                             | 3.27   | 0.00 |
| 221264_s_at  | <b>TARDBP</b>     | 23435 TAR DNA binding protein                              | -3.05  | 0.03 |
|              | <b>TARP ///</b>   | 445347 /// T cell receptor gamma constant 2 /// T cell     |        |      |
|              | <b>TRGC2 ///</b>  | 6967 /// receptor gamma variable 9 /// TCR gamma           |        |      |
| 216920_s_at  | <b>TRGV9</b>      | 6983 alternate reading frame protein                       | 10.42  | 0.06 |
| 201263_at    | <b>TARS</b>       | 6897 threonyl-tRNA synthetase                              | 2.95   | 0.25 |
| 221397_at    | <b>TAS2R10</b>    | 50839 taste receptor, type 2, member 10                    | -2.09  | 0.34 |
| 1553556_at   | <b>TAS2R40</b>    | 259286 taste receptor, type 2, member 40                   | -13.58 | 0.00 |
|              |                   | tafazzin (cardiomyopathy, dilated 3A (X-linked);           |        |      |
| 203977_at    | <b>TAZ</b>        | 6901 endocardial fibroelastosis 2; Barth syndrome)         | -2.98  | 0.16 |
| 228258_at    | <b>TBC1D10C</b>   | 374403 TBC1 domain family, member 10C                      | -10.98 | 0.13 |
| 224622_at    | <b>TBC1D14</b>    | 57533 TBC1 domain family, member 14                        | -4.62  | 0.16 |
| 222173_s_at  | <b>TBC1D2</b>     | 55357 TBC1 domain family, member 2                         | 3.00   | 0.34 |
| 223375_at    | <b>TBC1D22B</b>   | 55633 TBC1 domain family, member 22B                       | 2.73   | 0.16 |
| 201814_at    | <b>TBC1D5</b>     | 9779 TBC1 domain family, member 5                          | -2.07  | 0.51 |
| 223461_at    | <b>TBC1D7</b>     | 51256 TBC1 domain family, member 7                         | 6.60   | 0.02 |
| 203667_at    | <b>TBCA</b>       | 6902 tubulin folding cofactor A                            | 3.00   | 0.06 |
| 218520_at    | <b>TBK1</b>       | 29110 TANK-binding kinase 1                                | 2.65   | 0.00 |
| 201868_s_at  | <b>TBL1X</b>      | 6907 transducin (beta)-like 1X-linked                      | -3.30  | 0.00 |
| 212685_s_at  | <b>TBL2</b>       | 26608 transducin (beta)-like 2                             | 15.11  | 0.25 |
| 207689_at    | <b>TBX10</b>      | 347853 T-box 10                                            | 2.10   | 0.06 |
|              |                   | thromboxane A synthase 1 (platelet, cytochrome             |        |      |
| 208130_s_at  | <b>TBXAS1</b>     | 6916 P450, family 5, subfamily A)                          | -5.23  | 0.00 |
| 213142_x_at  | <b>tcag7.1314</b> | 54103 hypothetical protein LOC54103                        | 23.72  | 0.00 |
| 238678_at    | <b>tcag7.907</b>  | 402483 hypothetical LOC402483                              | -6.34  | 0.03 |
|              |                   | transcription elongation factor B (SIII), polypeptide      |        |      |
| 202824_s_at  | <b>TCEB1</b>      | 6921 1 (15kDa, elongin C)                                  | 2.37   | 0.00 |
|              |                   | transcription elongation factor B (SIII), polypeptide      |        |      |
| 213604_at    | <b>TCEB3</b>      | 6924 3 (110kDa, elongin A)                                 | 2.90   | 0.00 |
| 202396_at    | <b>TCERG1</b>     | 10915 transcription elongation regulator 1                 | 2.57   | 0.34 |
|              |                   | transcription factor 3 (E2A immunoglobulin                 |        |      |
| 209152_s_at  | <b>TCF3</b>       | 6929 enhancer binding factors E12/E47)                     | 3.12   | 0.06 |
| 204849_at    | <b>TCFL5</b>      | 10732 transcription factor-like 5 (basic helix-loop-helix) | 4.18   | 0.13 |

|              |                   |                                                          |        |      |
|--------------|-------------------|----------------------------------------------------------|--------|------|
| 221624_at    | <b>TCL6</b>       | 27004 T-cell leukemia/lymphoma 6                         | 2.65   | 0.00 |
| 222011_s_at  | <b>TCP1</b>       | 6950 t-complex 1                                         | 4.64   | 0.06 |
| 1553861_at   | <b>TCP11L2</b>    | 255394 t-complex 11 (mouse)-like 2                       | -40.61 | 0.00 |
| 203743_s_at  | <b>TDG</b>        | 6996 thymine-DNA glycosylase                             | 2.31   | 0.51 |
| 232692_at    | <b>TDRD6</b>      | 221400 tudor domain containing 6                         | 14.36  | 0.34 |
| 213361_at    | <b>TDRD7</b>      | 23424 tudor domain containing 7                          | 2.28   | 0.16 |
| 218104_at    | <b>TEX10</b>      | 54881 testis expressed 10                                | 3.68   | 0.08 |
| 212083_at    | <b>TEX261</b>     | 113419 testis expressed 261                              | 4.62   | 0.13 |
| 50221_at     | <b>TFEB</b>       | 7942 transcription factor EB                             | -3.47  | 0.34 |
| 232383_at    | <b>TFEC</b>       | 22797 transcription factor EC                            | 66.48  | 0.00 |
| 217839_at    | <b>TFG</b>        | 10342 TRK-fused gene                                     | 3.34   | 0.00 |
| 202750_s_at  | <b>TFIP11</b>     | 24144 tuftelin interacting protein 11                    | 2.78   | 0.34 |
| 207332_s_at  | <b>TFRC</b>       | 7037 transferrin receptor (p90, CD71)                    | 11.88  | 0.06 |
| 205016_at    | <b>TGFA</b>       | 7039 transforming growth factor, alpha                   | -2.73  | 0.25 |
|              |                   | transforming growth factor, beta receptor II             |        |      |
| 208944_at    | <b>TGFBR2</b>     | 7048 (70/80kDa)                                          | -4.45  | 0.00 |
| 203313_s_at  | <b>TGIF1</b>      | 7050 TGFB-induced factor homeobox 1                      | 6.83   | 0.00 |
| 216262_s_at  | <b>TGIF2</b>      | 60436 TGFB-induced factor homeobox 2                     | 6.18   | 0.08 |
|              |                   | transglutaminase 2 (C polypeptide, protein-              |        |      |
| 201042_at    | <b>TGM2</b>       | 7052 glutamine-gamma-glutamyltransferase)                | 14.23  | 0.02 |
| 225261_x_at  | <b>TH1L</b>       | 51497 TH1-like (Drosophila)                              | 3.17   | 0.16 |
| 203887_s_at  | <b>THBD</b>       | 7056 thrombomodulin                                      | -3.16  | 0.07 |
| 204565_at    | <b>THEM2</b>      | 55856 thioesterase superfamily member 2                  | 2.37   | 0.16 |
| 226320_at    | <b>THOC4</b>      | 10189 THO complex 4                                      | 3.34   | 0.02 |
| 225730_s_at  | <b>THUMPD3</b>    | 25917 THUMP domain containing 3                          | 9.36   | 0.02 |
| 223711_s_at  | <b>THYN1</b>      | 29087 thymocyte nuclear protein 1                        | -2.34  | 0.34 |
| 228234_at    | <b>TICAM2</b>     | 353376 toll-like receptor adaptor molecule 2             | 4.10   | 0.16 |
|              |                   | TRAF-interacting protein with a forkhead-                |        |      |
| 238858_at    | <b>TIFA</b>       | 92610 associated domain                                  | 9.74   | 0.00 |
| 229789_at    | <b>TIGD3</b>      | 220359 tigger transposable element derived 3             | -21.53 | 0.00 |
| 203046_s_at  | <b>TIMELESS</b>   | 8914 timeless homolog (Drosophila)                       | 2.39   | 0.13 |
|              |                   | translocase of inner mitochondrial membrane 10           |        |      |
| 1555764_s_at | <b>TIMM10</b>     | 26519 homolog (yeast)                                    | 10.20  | 0.00 |
|              |                   | translocase of inner mitochondrial membrane 17           |        |      |
| 201821_s_at  | <b>TIMM17A</b>    | 10440 homolog A (yeast)                                  | 5.12   | 0.00 |
|              |                   | translocase of inner mitochondrial membrane 23           |        |      |
| 225535_s_at  | <b>TIMM23</b>     | 10431 homolog (yeast)                                    | 3.67   | 0.25 |
|              |                   | translocase of inner mitochondrial membrane 23           |        |      |
|              | <b>TIMM23 ///</b> | 10431 ///<br>homolog (yeast) ///<br>translocase of inner |        |      |
| 218119_at    | <b>TIMM23B</b>    | 653252 mitochondrial membrane 23 homolog B (yeast)       | 3.43   | 0.02 |
| 231579_s_at  | <b>TIMP2</b>      | 7077 TIMP metalloproteinase inhibitor 2                  | -3.03  | 0.00 |
| 221857_s_at  | <b>TJAP1</b>      | 93643 tight junction associated protein 1 (peripheral)   | 11.08  | 0.02 |
| 208700_s_at  | <b>TKT</b>        | 7086 transketolase (Wernicke-Korsakoff syndrome)         | -8.50  | 0.00 |
|              |                   | transducin-like enhancer of split 4 (E(sp1)              |        |      |
| 204872_at    | <b>TLE4</b>       | 7091 homolog, Drosophila)                                | -2.22  | 0.03 |
| 210176_at    | <b>TLR1</b>       | 7096 toll-like receptor 1                                | -3.28  | 0.00 |
| 223750_s_at  | <b>TLR10</b>      | 81793 toll-like receptor 10                              | -3.60  | 0.25 |
| 210166_at    | <b>TLR5</b>       | 7100 toll-like receptor 5                                | -8.54  | 0.03 |
| 207446_at    | <b>TLR6</b>       | 10333 toll-like receptor 6                               | -6.05  | 0.03 |
| 229560_at    | <b>TLR8</b>       | 51311 toll-like receptor 8                               | -2.30  | 0.00 |
| 213351_s_at  | <b>TMCC1</b>      | 23023 transmembrane and coiled-coil domain family 1      | -4.35  | 0.34 |
| 226489_at    | <b>TMCC3</b>      | 57458 transmembrane and coiled-coil domain family 3      | -5.59  | 0.00 |
| 226050_at    | <b>TMCO3</b>      | 55002 transmembrane and coiled-coil domains 3            | -6.70  | 0.07 |
|              |                   | transmembrane emp24-like trafficking protein 10          |        |      |
| 200929_at    | <b>TMED10</b>     | 10972 (yeast)                                            | 3.01   | 0.06 |

|             |                  |                                                                                               |        |      |
|-------------|------------------|-----------------------------------------------------------------------------------------------|--------|------|
| 202194_at   | <b>TMED5</b>     | 50999 transmembrane emp24 protein transport domain containing 5                               | 2.27   | 0.16 |
| 209404_s_at | <b>TMED7</b>     | 51014 transmembrane emp24 protein transport domain containing 7                               | 2.70   | 0.02 |
| 225343_at   | <b>TMED8</b>     | 283578 transmembrane emp24 protein transport domain containing 8                              | -2.25  | 0.79 |
| 205812_s_at | <b>TMED9</b>     | 54732 transmembrane emp24 protein transport domain containing 9                               | 2.57   | 0.00 |
| 223277_at   | <b>TMEM103</b>   | 54859 transmembrane protein 103                                                               | 2.99   | 0.79 |
| 221622_s_at | <b>TMEM126B</b>  | 55863 transmembrane protein 126B                                                              | 4.12   | 0.00 |
| 225462_at   | <b>TMEM128</b>   | 85013 transmembrane protein 128                                                               | 2.57   | 0.79 |
| 225588_s_at | <b>TMEM129</b>   | 92305 transmembrane protein 129                                                               | -2.55  | 0.51 |
| 219690_at   | <b>TMEM149</b>   | 79713 transmembrane protein 149                                                               | 2.06   | 0.13 |
| 226752_at   | <b>TMEM157</b>   | 345757 transmembrane protein 157                                                              | -8.26  | 0.00 |
| 213338_at   | <b>TMEM158</b>   | 25907 transmembrane protein 158                                                               | 32.16  | 0.00 |
| 223202_s_at | <b>TMEM164</b>   | 84187 transmembrane protein 164                                                               | -2.34  | 0.00 |
| 224906_at   | <b>TMEM16F</b>   | 196527 transmembrane protein 16F                                                              | 2.60   | 0.06 |
| 227586_at   | <b>TMEM170</b>   | 124491 transmembrane protein 170                                                              | 2.32   | 0.51 |
| 220532_s_at | <b>TMEM176B</b>  | 28959 transmembrane protein 176B                                                              | 6.54   | 0.13 |
| 218113_at   | <b>TMEM2</b>     | 23670 transmembrane protein 2                                                                 | -4.71  | 0.00 |
| 218772_x_at | <b>TMEM38B</b>   | 55151 transmembrane protein 38B                                                               | 3.41   | 0.13 |
| 241392_at   | <b>TMEM39A</b>   | 55254 Transmembrane protein 39A                                                               | 2.97   | 0.34 |
| 202857_at   | <b>TMEM4</b>     | 10330 transmembrane protein 4                                                                 | 8.39   | 0.00 |
| 217795_s_at | <b>TMEM43</b>    | 79188 transmembrane protein 43                                                                | -3.03  | 0.00 |
| 217766_s_at | <b>TMEM50A</b>   | 23585 transmembrane protein 50A                                                               | -2.27  | 0.07 |
| 226338_at   | <b>TMEM55A</b>   | 55529 transmembrane protein 55A                                                               | -3.64  | 0.00 |
| 225287_s_at | <b>TMEM55B</b>   | 90809 transmembrane protein 55B                                                               | 2.18   | 0.08 |
| 223396_at   | <b>TMEM60</b>    | 85025 transmembrane protein 60                                                                | 2.52   | 0.00 |
| 241342_at   | <b>TMEM65</b>    | 157378 transmembrane protein 65                                                               | -5.09  | 0.25 |
| 238429_at   | <b>TMEM71</b>    | 137835 transmembrane protein 71                                                               | -36.83 | 0.00 |
| 212204_at   | <b>TMEM87A</b>   | 25963 transmembrane protein 87A                                                               | 2.76   | 0.00 |
| 229957_at   | <b>TMEM91</b>    | 641649 transmembrane protein 91                                                               | -5.01  | 0.00 |
| 222449_at   | <b>TMEPAI</b>    | 56937 transmembrane, prostate androgen induced RNA                                            | -2.65  | 0.03 |
| 219701_at   | <b>TMOD2</b>     | 29767 tropomodulin 2 (neuronal)                                                               | -2.48  | 0.79 |
| 217733_s_at | <b>TMSB10</b>    | 9168 thymosin, beta 10                                                                        | 2.97   | 0.00 |
| 207113_s_at | <b>TNF</b>       | tumor necrosis factor (TNF superfamily, member 7124 2)                                        | 9.44   | 0.00 |
| 202643_s_at | <b>TNFAIP3</b>   | 7128 tumor necrosis factor, alpha-induced protein 3                                           | 24.68  | 0.00 |
| 206025_s_at | <b>TNFAIP6</b>   | 7130 tumor necrosis factor, alpha-induced protein 6                                           | 8.24   | 0.00 |
| 231775_at   | <b>TNFRSF10A</b> | tumor necrosis factor receptor superfamily, member 10a                                        | 7.57   | 0.00 |
| 206222_at   | <b>TNFRSF10C</b> | tumor necrosis factor receptor superfamily, member 10c, decoy without an intracellular domain | -31.72 | 0.00 |
| 207536_s_at | <b>TNFRSF9</b>   | tumor necrosis factor receptor superfamily, member 9                                          | 2.13   | 0.34 |
| 221085_at   | <b>TNFSF15</b>   | tumor necrosis factor (ligand) superfamily, member 15                                         | 15.80  | 0.00 |
| 207216_at   | <b>TNFSF8</b>    | tumor necrosis factor (ligand) superfamily, member 8                                          | 7.34   | 0.00 |
| 217931_at   | <b>TNRC5</b>     | 10695 trinucleotide repeat containing 5                                                       | -4.13  | 0.03 |
| 240044_x_at | <b>TNRC6B</b>    | 23112 Trinucleotide repeat containing 6B                                                      | -4.89  | 0.00 |
| 228834_at   | <b>TOB1</b>      | 10140 transducer of ERBB2, 1                                                                  | -2.16  | 0.79 |
| 233881_s_at | <b>TOLLIP</b>    | 54472 toll interacting protein                                                                | 2.60   | 0.16 |
| 202807_s_at | <b>TOM1</b>      | 10043 target of myb1 (chicken)                                                                | 3.36   | 0.02 |
| 204485_s_at | <b>TOM1L1</b>    | 10040 target of myb1 (chicken)-like 1                                                         | 2.19   | 0.25 |
| 226198_at   | <b>TOM1L2</b>    | 146691 target of myb1-like 2 (chicken)                                                        | -9.18  | 0.00 |

|              |                 |                                                                                                        |        |      |
|--------------|-----------------|--------------------------------------------------------------------------------------------------------|--------|------|
| 212773_s_at  | <b>TOMM20</b>   | translocase of outer mitochondrial membrane 20<br>9804 homolog (yeast)                                 | 5.02   | 0.08 |
| 222474_s_at  | <b>TOMM22</b>   | translocase of outer mitochondrial membrane 22<br>56993 homolog (yeast)                                | 3.54   | 0.06 |
| 226059_at    | <b>TOMM40L</b>  | translocase of outer mitochondrial membrane 40<br>84134 homolog (yeast)-like                           | 5.91   | 0.13 |
| 201512_s_at  | <b>TOMM70A</b>  | translocase of outer mitochondrial membrane 70<br>9868 homolog A (S. cerevisiae)                       | 6.50   | 0.13 |
| 202633_at    | <b>TOPBP1</b>   | 11073 topoisomerase (DNA) II binding protein 1                                                         | -2.77  | 0.79 |
| 204071_s_at  | <b>TOPORS</b>   | 10210 topoisomerase I binding, arginine/serine-rich                                                    | -4.25  | 0.00 |
| 201746_at    | <b>TP53</b>     | 7157 tumor protein p53 (Li-Fraumeni syndrome)                                                          | 3.55   | 0.25 |
| 203050_at    | <b>TP53BP1</b>  | 7158 tumor protein p53 binding protein 1                                                               | 3.52   | 0.00 |
| 203421_at    | <b>TP53I11</b>  | 9537 tumor protein p53 inducible protein 11                                                            | -4.12  | 0.00 |
| 225912_at    | <b>TP53INP1</b> | 94241 tumor protein p53 inducible nuclear protein 1                                                    | -4.48  | 0.00 |
| 235194_at    | <b>TPCN2</b>    | 219931 two pore segment channel 2                                                                      | -3.78  | 0.03 |
| 214365_at    | <b>TPM3</b>     | 7170 tropomyosin 3                                                                                     | -5.62  | 0.13 |
| 200742_s_at  | <b>TPP1</b>     | 1200 tripeptidyl peptidase I<br>translocated promoter region (to activated MET                         | 4.04   | 0.00 |
| 201730_s_at  | <b>TPR</b>      | 7175 oncogene)                                                                                         | -3.15  | 0.00 |
| 204140_at    | <b>TPST1</b>    | 8460 tyrosylprotein sulfotransferase 1                                                                 | -5.91  | 0.51 |
| 1556876_s_at | <b>TPTEps1</b>  | 440140 TPTE pseudogene 1                                                                               | 2.23   | 0.51 |
| 216191_s_at  | <b>TRA@ ///</b> | 6955 /// T cell receptor alpha locus /// T cell receptor delta                                         |        |      |
| 226839_at    | <b>TRD@</b>     | 6964 locus                                                                                             | 12.84  | 0.51 |
| 235116_at    | <b>TRA16</b>    | 126382 TR4 orphan receptor associated protein TRA16                                                    | 2.50   | 0.16 |
| 208315_x_at  | <b>TRAF1</b>    | 7185 TNF receptor-associated factor 1                                                                  | 38.73  | 0.02 |
| 213888_s_at  | <b>TRAF3</b>    | 7187 TNF receptor-associated factor 3                                                                  | 5.07   | 0.06 |
| 243196_s_at  | <b>TRAF3IP3</b> | 80342 TRAF3 interacting protein 3                                                                      | -6.56  | 0.07 |
| 201399_s_at  | <b>TRAFD1</b>   | 10906 TRAF-type zinc finger domain containing 1                                                        | 2.30   | 0.00 |
| 203511_s_at  | <b>TRAM1</b>    | 23471 translocation associated membrane protein 1                                                      | 2.86   | 0.00 |
| 229016_s_at  | <b>TRAPPC3</b>  | 27095 trafficking protein particle complex 3                                                           | 2.93   | 0.08 |
| 218145_at    | <b>TRERF1</b>   | 55809 transcriptional regulating factor 1                                                              | -17.92 | 0.07 |
| 231934_at    | <b>TRIB3</b>    | 57761 tribbles homolog 3 (Drosophila)                                                                  | 12.89  | 0.08 |
| 210994_x_at  | <b>TRIM14</b>   | 9830 tripartite motif-containing 14                                                                    | 2.52   | 0.34 |
| 242812_at    | <b>TRIM23</b>   | 373 tripartite motif-containing 23                                                                     | -4.35  | 0.03 |
| 210705_s_at  | <b>TRIM26</b>   | 7726 Tripartite motif-containing 26                                                                    | 3.78   | 0.16 |
| 1568592_at   | <b>TRIM5</b>    | 85363 tripartite motif-containing 5                                                                    | 2.07   | 0.25 |
| 221012_s_at  | <b>TRIM69</b>   | 140691 tripartite motif-containing 69                                                                  | 2.25   | 0.00 |
| 202734_at    | <b>TRIM8</b>    | 81603 tripartite motif-containing 8                                                                    | -4.98  | 0.00 |
| 218617_at    | <b>TRIP10</b>   | 9322 thyroid hormone receptor interactor 10                                                            | 7.34   | 0.00 |
| 222768_s_at  | <b>TRIT1</b>    | 54802 tRNA isopentenyltransferase 1                                                                    | 2.80   | 0.08 |
| 240389_at    | <b>TRMT6</b>    | 51605 tRNA methyltransferase 6 homolog (S. cerevisiae)<br>Transient receptor potential cation channel, | 13.31  | 0.00 |
| 223324_s_at  | <b>TRPM6</b>    | 140803 subfamily M, member 6<br>transient receptor potential cation channel,                           | -12.35 | 0.00 |
| 215111_s_at  | <b>TRPM7</b>    | 54822 subfamily M, member 7                                                                            | 8.34   | 0.00 |
| 204094_s_at  | <b>TSC22D1</b>  | 8848 TSC22 domain family, member 1                                                                     | 6.61   | 0.06 |
| 208763_s_at  | <b>TSC22D2</b>  | 9819 TSC22 domain family, member 2                                                                     | 2.17   | 0.06 |
| 218132_s_at  | <b>TSC22D3</b>  | 1831 TSC22 domain family, member 3<br>tRNA splicing endonuclease 34 homolog (S.                        | -4.27  | 0.00 |
| 214331_at    | <b>TSEN34</b>   | 79042 cerevisiae)                                                                                      | -2.76  | 0.07 |
| 233236_at    | <b>TSFM</b>     | 10102 Ts translation elongation factor, mitochondrial                                                  | -4.31  | 0.13 |
| 225235_at    | <b>TSPAN16</b>  | 26526 tetraspanin 16                                                                                   | -8.09  | 0.03 |
| 227233_at    | <b>TSPAN17</b>  | 26262 tetraspanin 17                                                                                   | 8.69   | 0.00 |
| 218156_s_at  | <b>TSPAN2</b>   | 10100 tetraspanin 2<br>TSR1, 20S rRNA accumulation, homolog (S.                                        | -9.62  | 0.07 |
| 209605_at    | <b>TSR1</b>     | 55720 cerevisiae)                                                                                      | 3.40   | 0.16 |
|              | <b>TST</b>      | 7263 thiosulfate sulfurtransferase (rhodanese)                                                         | -17.83 | 0.34 |



|             |                |                                                                                                  |       |      |
|-------------|----------------|--------------------------------------------------------------------------------------------------|-------|------|
| 201434_at   | <b>TTC1</b>    | 7265 tetratricopeptide repeat domain 1                                                           | 3.12  | 0.02 |
| 1554672_at  | <b>TTC26</b>   | 79989 tetratricopeptide repeat domain 26                                                         | 2.22  | 0.06 |
| 208663_s_at | <b>TTC3</b>    | 7267 tetratricopeptide repeat domain 3                                                           | 2.58  | 0.51 |
| 203584_at   | <b>TTC35</b>   | 9694 tetratricopeptide repeat domain 35                                                          | 5.02  | 0.00 |
| 226120_at   | <b>TTC8</b>    | 123016 tetratricopeptide repeat domain 8                                                         | -2.62 | 0.25 |
| 209118_s_at | <b>TUBA1A</b>  | 7846 tubulin, alpha 1a                                                                           | -2.31 | 0.00 |
| 207490_at   | <b>TUBA4B</b>  | 80086 tubulin, alpha 4b (pseudogene)                                                             | -2.88 | 0.00 |
| 204141_at   | <b>TUBB2A</b>  | 7280 tubulin, beta 2A                                                                            | 21.28 | 0.13 |
| 209191_at   | <b>TUBB6</b>   | 84617 tubulin, beta 6                                                                            | 13.04 | 0.34 |
| 201113_at   | <b>TUFM</b>    | 7284 Tu translation elongation factor, mitochondrial twinfilin, actin-binding protein, homolog 1 | 2.24  | 0.16 |
| 201745_at   | <b>TWF1</b>    | 5756 (Drosophila)                                                                                | 2.25  | 0.79 |
| 225406_at   | <b>TWSG1</b>   | 57045 twisted gastrulation homolog 1 (Drosophila)                                                | 4.63  | 0.06 |
| 231169_at   | <b>TXLNA</b>   | 200081 Taxilin alpha                                                                             | 3.46  | 0.02 |
| 1552822_at  | <b>TXNDC10</b> | 54495 thioredoxin domain containing 10                                                           | 2.22  | 0.25 |
| 201580_s_at | <b>TXNDC13</b> | 56255 thioredoxin domain containing 13                                                           | -4.80 | 0.00 |
| 201175_at   | <b>TXNDC14</b> | 51075 thioredoxin domain containing 14                                                           | 8.58  | 0.08 |
| 201008_s_at | <b>TXNIP</b>   | 10628 thioredoxin interacting protein                                                            | -2.37 | 0.00 |
| 201588_at   | <b>TXNL1</b>   | 9352 thioredoxin-like 1                                                                          | 2.47  | 0.00 |
| 205546_s_at | <b>TYK2</b>    | 7297 tyrosine kinase 2                                                                           | -2.16 | 0.08 |
| 209340_at   | <b>UAP1</b>    | 6675 UDP-N-acetylglucosamine pyrophosphorylase 1                                                 | 6.31  | 0.51 |
| 205890_s_at | <b>UBD</b>     | 10537 ubiquitin D                                                                                | 77.53 | 0.00 |
| 203281_s_at | <b>UBE1L</b>   | 7318 ubiquitin-activating enzyme E1-like ubiquitin-conjugating enzyme E2B (RAD6)                 | -2.70 | 0.08 |
| 224118_at   | <b>UBE2B</b>   | 7320 homolog) ubiquitin-conjugating enzyme E2E 1 (UBC4/5)                                        | -2.66 | 0.79 |
| 212519_at   | <b>UBE2E1</b>  | 7324 homolog, yeast) ubiquitin-conjugating enzyme E2G 2 (UBC7)                                   | 3.27  | 0.00 |
| 209041_s_at | <b>UBE2G2</b>  | 7327 homolog, yeast) ubiquitin-conjugating enzyme E2, J1 (UBC6)                                  | 4.24  | 0.25 |
| 217823_s_at | <b>UBE2J1</b>  | 51465 homolog, yeast)                                                                            | -2.43 | 0.03 |
| 201649_at   | <b>UBE2L6</b>  | 9246 ubiquitin-conjugating enzyme E2L 6 ubiquitin-conjugating enzyme E2N (UBC13)                 | 2.69  | 0.00 |
| 201524_x_at | <b>UBE2N</b>   | 7334 homolog, yeast)                                                                             | 2.08  | 0.13 |
| 209096_at   | <b>UBE2V2</b>  | 7336 ubiquitin-conjugating enzyme E2 variant 2                                                   | 4.23  | 0.00 |
| 217750_s_at | <b>UBE2Z</b>   | 65264 ubiquitin-conjugating enzyme E2Z                                                           | 5.55  | 0.06 |
| 211285_s_at | <b>UBE3A</b>   | ubiquitin protein ligase E3A (human papilloma virus E6-associated protein, Angelman syndrome)    | 2.50  | 0.16 |
| 202317_s_at | <b>UBE4B</b>   | 10277 ubiquitination factor E4B (UFD2 homolog, yeast)                                            | -3.01 | 0.00 |
| 207253_s_at | <b>UBN1</b>    | 29855 ubinuclein 1                                                                               | -2.49 | 0.00 |
| 224513_s_at | <b>UBQLN4</b>  | 56893 ubiquilin 4 ubiquitin protein ligase E3 component n-recognin                               | 9.95  | 0.13 |
| 238528_at   | <b>UBR1</b>    | 197131 1 ubiquitin protein ligase E3 component n-recognin                                        | 8.81  | 0.00 |
| 212756_s_at | <b>UBR2</b>    | 23304 2 Ubiquitin protein ligase E3 component n-recognin                                         | -4.45 | 0.00 |
| 1555888_at  | <b>UBR5</b>    | 51366 5                                                                                          | -7.64 | 0.00 |
| 223012_at   | <b>UBXD1</b>   | 80700 UBX domain containing 1                                                                    | -2.08 | 0.34 |
| 215983_s_at | <b>UBXD6</b>   | 7993 UBX domain containing 6 ubiquitin carboxyl-terminal esterase L3 (ubiquitin                  | 8.18  | 0.79 |
| 204616_at   | <b>UCHL3</b>   | 7347 thiolesterase) uncoupling protein 2 (mitochondrial, proton                                  | 3.45  | 0.51 |
| 208998_at   | <b>UCP2</b>    | 7351 carrier)                                                                                    | 4.99  | 0.51 |
| 217797_at   | <b>UFC1</b>    | 51506 ubiquitin-fold modifier conjugating enzyme 1                                               | 2.92  | 0.02 |
| 218050_at   | <b>UFM1</b>    | 51569 ubiquitin-fold modifier 1                                                                  | 3.22  | 0.00 |

|             |               |                                                                                                           |       |      |
|-------------|---------------|-----------------------------------------------------------------------------------------------------------|-------|------|
| 224967_at   | <b>UGCG</b>   | 7357 UDP-glucose ceramide glucosyltransferase                                                             | 2.01  | 0.00 |
| 205480_s_at | <b>UGP2</b>   | 7360 UDP-glucose pyrophosphorylase 2                                                                      | 2.36  | 0.02 |
| 220746_s_at | <b>UIMC1</b>  | 51720 ubiquitin interaction motif containing 1                                                            | -2.80 | 0.07 |
| 209333_at   | <b>ULK1</b>   | 8408 unc-51-like kinase 1 (C. elegans)                                                                    | -4.34 | 0.16 |
| 228219_s_at | <b>UPB1</b>   | 51733 ureidopropionase, beta<br>UPF3 regulator of nonsense transcripts homolog                            | 7.62  | 0.06 |
| 218757_s_at | <b>UPF3B</b>  | 65109 B (yeast)                                                                                           | 2.38  | 0.79 |
| 203234_at   | <b>UPP1</b>   | 7378 uridine phosphorylase 1<br>ubiquinol-cytochrome c reductase complex                                  | 5.13  | 0.13 |
| 217935_s_at | <b>UQCC</b>   | 55245 chaperone, CBP3 homolog (yeast)                                                                     | 2.23  | 0.34 |
| 200883_at   | <b>UQCRC2</b> | 7385 ubiquinol-cytochrome c reductase core protein II                                                     | 2.86  | 0.13 |
| 202233_s_at | <b>UQCRH</b>  | 7388 ubiquinol-cytochrome c reductase hinge protein                                                       | 2.52  | 0.00 |
| 218601_at   | <b>URG4</b>   | 55665 up-regulated gene 4<br>ubiquitin related modifier 1 homolog (S.                                     | 2.44  | 0.51 |
| 208101_s_at | <b>URM1</b>   | 81605 cerevisiae)                                                                                         | 2.43  | 0.51 |
| 209137_s_at | <b>USP10</b>  | 9100 ubiquitin specific peptidase 10<br>ubiquitin specific peptidase 14 (tRNA-guanine                     | -3.30 | 0.00 |
| 226567_at   | <b>USP14</b>  | 9097 transglycosylase)                                                                                    | 5.39  | 0.16 |
| 218386_x_at | <b>USP16</b>  | 10600 ubiquitin specific peptidase 16                                                                     | 2.45  | 0.25 |
| 224978_s_at | <b>USP36</b>  | 57602 ubiquitin specific peptidase 36                                                                     | 7.11  | 0.25 |
| 223289_s_at | <b>USP38</b>  | 84640 ubiquitin specific peptidase 38                                                                     | -3.59 | 0.79 |
| 202682_s_at | <b>USP4</b>   | 7375 ubiquitin specific peptidase 4 (proto-oncogene)<br>UTP11-like, U3 small nucleolar ribonucleoprotein, | -2.60 | 0.00 |
| 218235_s_at | <b>UTP11L</b> | 51118 (yeast)<br>UTP15, U3 small nucleolar ribonucleoprotein,                                             | 6.89  | 0.00 |
| 228050_at   | <b>UTP15</b>  | 84135 homolog (S. cerevisiae)<br>UTP18, small subunit (SSU) processome                                    | 8.60  | 0.06 |
| 203721_s_at | <b>UTP18</b>  | 51096 component, homolog (yeast)                                                                          | 8.67  | 0.02 |
| 203241_at   | <b>UVRAG</b>  | 7405 UV radiation resistance associated gene                                                              | 4.17  | 0.00 |
| 225583_at   | <b>UXS1</b>   | 80146 UDP-glucuronate decarboxylase 1<br>vesicle-associated membrane protein 5                            | 10.89 | 0.02 |
| 204929_s_at | <b>VAMP5</b>  | 10791 (myobrevin)<br>vesicle-associated membrane protein 8                                                | 14.16 | 0.00 |
| 202546_at   | <b>VAMP8</b>  | 8673 (endobrevin)                                                                                         | 6.44  | 0.00 |
| 226063_at   | <b>VAV2</b>   | 7410 vav 2 guanine nucleotide exchange factor                                                             | 2.50  | 0.79 |
| 212038_s_at | <b>VDAC1</b>  | 7416 voltage-dependent anion channel 1                                                                    | 6.10  | 0.34 |
| 211662_s_at | <b>VDAC2</b>  | 7417 voltage-dependent anion channel 2                                                                    | 2.34  | 0.13 |
| 201831_s_at | <b>VDP</b>    | 8615 vesicle docking protein p115                                                                         | 2.72  | 0.02 |
| 211527_x_at | <b>VEGFA</b>  | 7422 vascular endothelial growth factor A                                                                 | 14.01 | 0.00 |
| 209950_s_at | <b>VILL</b>   | 50853 villin-like<br>vitelline membrane outer layer 1 homolog                                             | 4.49  | 0.25 |
| 235751_s_at | <b>VMO1</b>   | 284013 (chicken)                                                                                          | 5.08  | 0.00 |
| 205922_at   | <b>VNN2</b>   | 8875 vanin 2                                                                                              | -3.33 | 0.00 |
| 220528_at   | <b>VNN3</b>   | 55350 vanin 3<br>vacuolar protein sorting 13 homolog C (S.                                                | -8.54 | 0.00 |
| 218396_at   | <b>VPS13C</b> | 54832 cerevisiae)<br>vacuolar protein sorting 18 homolog (S.                                              | 5.87  | 0.00 |
| 223346_at   | <b>VPS18</b>  | 57617 cerevisiae)                                                                                         | 3.18  | 0.13 |
| 225483_at   | <b>VPS26B</b> | 112936 vacuolar protein sorting 26 homolog B (S. pombe)                                                   | -4.18 | 0.25 |
| 209553_at   | <b>VPS8</b>   | 23355 vacuolar protein sorting 8 homolog (S. cerevisiae)                                                  | -2.28 | 0.79 |
| 200628_s_at | <b>WARS</b>   | 7453 tryptophanyl-tRNA synthetase<br>Wiskott-Aldrich syndrome (eczema-                                    | 8.32  | 0.00 |
| 38964_r_at  | <b>WAS</b>    | 7454 thrombocytopenia)                                                                                    | -2.05 | 0.34 |
| 224563_at   | <b>WASF2</b>  | 10163 WAS protein family, member 2                                                                        | -2.97 | 0.25 |
| 217975_at   | <b>WBP5</b>   | 51186 WW domain binding protein 5                                                                         | 3.64  | 0.34 |

|             |                |                                                                                                                        |        |      |
|-------------|----------------|------------------------------------------------------------------------------------------------------------------------|--------|------|
| 233559_s_at | <b>WDFY1</b>   | 57590 WD repeat and FYVE domain containing 1                                                                           | 2.71   | 0.25 |
| 224897_at   | <b>WDR26</b>   | 80232 WD repeat domain 26                                                                                              | -2.34  | 0.00 |
| 238677_at   | <b>WDR36</b>   | 134430 WD repeat domain 36                                                                                             | 6.12   | 0.08 |
| 222503_s_at | <b>WDR41</b>   | 55255 WD repeat domain 41                                                                                              | 2.47   | 0.51 |
| 216885_s_at | <b>WDR42A</b>  | 50717 WD repeat domain 42A                                                                                             | -2.49  | 0.16 |
| 65591_at    | <b>WDR48</b>   | 57599 WD repeat domain 48                                                                                              | 2.63   | 0.51 |
| 226283_at   | <b>WDR51B</b>  | 282809 WD repeat domain 51B                                                                                            | -2.55  | 0.34 |
| 201420_s_at | <b>WDR77</b>   | 79084 WD repeat domain 77                                                                                              | 4.35   | 0.25 |
| 225676_s_at | <b>WDSOF1</b>  | 25879 WD repeats and SOF1 domain containing                                                                            | 7.78   | 0.08 |
| 224076_s_at | <b>WHSC1L1</b> | 54904 Wolf-Hirschhorn syndrome candidate 1-like 1                                                                      | -4.25  | 0.03 |
| 203112_s_at | <b>WHSC2</b>   | 7469 Wolf-Hirschhorn syndrome candidate 2                                                                              | 2.05   | 0.51 |
| 224465_s_at | <b>WIBG</b>    | 84305 within bgcn homolog (Drosophila)                                                                                 | 2.98   | 0.51 |
| 213836_s_at | <b>WIPI1</b>   | 55062 WD repeat domain, phosphoinositide interacting 1                                                                 | -7.65  | 0.00 |
| 204710_s_at | <b>WIPI2</b>   | 26100 WD repeat domain, phosphoinositide interacting 2<br>wingless-type MMTV integration site family,                  | -3.41  | 0.00 |
| 224022_x_at | <b>WNT16</b>   | 51384 member 16                                                                                                        | 2.21   | 0.16 |
| 222489_s_at | <b>WRNIP1</b>  | 56897 Werner helicase interacting protein 1                                                                            | 2.03   | 0.25 |
| 203137_at   | <b>WTAP</b>    | 9589 Wilms tumor 1 associated protein                                                                                  | 2.89   | 0.00 |
| 219520_s_at | <b>WWC3</b>    | 55841 WWC family member 3                                                                                              | -6.29  | 0.13 |
| 210695_s_at | <b>WWOX</b>    | 51741 WW domain containing oxidoreductase                                                                              | 2.11   | 0.34 |
| 228617_at   | <b>XAF1</b>    | 54739 XIAP associated factor-1                                                                                         | 5.94   | 0.00 |
| 200670_at   | <b>XBP1</b>    | 7494 X-box binding protein 1<br>XK, Kell blood group complex subunit-related                                           | 19.73  | 0.00 |
| 218753_at   | <b>XKR8</b>    | 55113 family, member 8<br>xeroderma pigmentosum, complementation group                                                 | -4.53  | 0.34 |
| 209375_at   | <b>XPC</b>     | 7508 C<br>X-prolyl aminopeptidase (aminopeptidase P) 1,                                                                | -2.56  | 0.34 |
| 209045_at   | <b>XPNPEP1</b> | 7511 soluble                                                                                                           | 12.06  | 0.13 |
| 214784_x_at | <b>XPO6</b>    | 23214 exportin 6<br><br>X-ray repair complementing defective repair in                                                 | -6.30  | 0.00 |
| 200792_at   | <b>XRCC6</b>   | 2547 Chinese hamster cells 6 (Ku autoantigen, 70kDa)                                                                   | 2.71   | 0.06 |
| 218069_at   | <b>XTP3TPA</b> | 79077 XTP3-transactivated protein A                                                                                    | 2.46   | 0.16 |
| 212048_s_at | <b>YARS</b>    | 8565 tyrosyl-tRNA synthetase                                                                                           | 4.71   | 0.51 |
| 208628_s_at | <b>YBX1</b>    | 4904 Y box binding protein 1                                                                                           | 2.71   | 0.00 |
| 37079_at    | <b>YDD19</b>   | 11049 YDD19 protein                                                                                                    | 4.61   | 0.51 |
| 212341_at   | <b>YIPF6</b>   | 286451 Yip1 domain family, member 6                                                                                    | 2.30   | 0.00 |
| 227020_at   | <b>YPEL2</b>   | 388403 yippee-like 2 (Drosophila)                                                                                      | -9.19  | 0.13 |
| 223179_at   | <b>YPEL3</b>   | 83719 yippee-like 3 (Drosophila)                                                                                       | -13.82 | 0.00 |
| 218647_s_at | <b>YRDC</b>    | 79693 yrdC domain containing (E. coli)                                                                                 | 5.88   | 0.34 |
| 217812_at   | <b>YTHDF2</b>  | 51441 YTH domain family, member 2<br>tyrosine 3-monooxygenase/tryptophan 5-<br>monooxygenase activation protein, gamma | 2.66   | 0.00 |
| 222985_at   | <b>YWHAG</b>   | 7532 polypeptide<br>tyrosine 3-monooxygenase/tryptophan 5-<br>monooxygenase activation protein, theta                  | 2.76   | 0.00 |
| 213699_s_at | <b>YWHAQ</b>   | 10971 polypeptide                                                                                                      | 2.27   | 0.25 |
| 224264_x_at | <b>ZAN</b>     | 7455 zonadhesin                                                                                                        | 2.27   | 0.51 |
| 213376_at   | <b>ZBTB1</b>   | 22890 zinc finger and BTB domain containing 1                                                                          | 3.39   | 0.00 |
| 205340_at   | <b>ZBTB24</b>  | 9841 zinc finger and BTB domain containing 24                                                                          | 2.98   | 0.16 |
| 227111_at   | <b>ZBTB34</b>  | 403341 zinc finger and BTB domain containing 34                                                                        | -3.06  | 0.03 |
| 226148_at   | <b>ZBTB44</b>  | 29068 zinc finger and BTB domain containing 44                                                                         | -6.41  | 0.00 |
| 227329_at   | <b>ZBTB46</b>  | 140685 zinc finger and BTB domain containing 46                                                                        | 9.55   | 0.25 |
| 205853_at   | <b>ZBTB7B</b>  | 51043 zinc finger and BTB domain containing 7B                                                                         | -2.55  | 0.08 |
| 218810_at   | <b>ZC3H12A</b> | 80149 zinc finger CCCH-type containing 12A                                                                             | 2.19   | 0.08 |

|              |                   |                                                          |        |      |
|--------------|-------------------|----------------------------------------------------------|--------|------|
| 231899_at    | <b>ZC3H12C</b>    | 85463 zinc finger CCCH-type containing 12C               | 11.20  | 0.51 |
| 201593_s_at  | <b>ZC3H15</b>     | 55854 zinc finger CCCH-type containing 15                | 2.15   | 0.00 |
| 221193_s_at  | <b>ZCCHC10</b>    | 54819 zinc finger, CCHC domain containing 10             | 5.38   | 0.00 |
| 220933_s_at  | <b>ZCCHC6</b>     | 79670 zinc finger, CCHC domain containing 6              | -2.14  | 0.00 |
| 212982_at    | <b>ZDHHC17</b>    | 23390 zinc finger, DHHC-type containing 17               | -2.58  | 0.07 |
| 231908_at    | <b>ZDHHC18</b>    | 84243 zinc finger, DHHC-type containing 18               | -2.90  | 0.07 |
| 222731_at    | <b>ZDHHC2</b>     | 51201 zinc finger, DHHC-type containing 2                | -2.81  | 0.16 |
| 224858_at    | <b>ZDHHC5</b>     | 25921 zinc finger, DHHC-type containing 5                | 2.15   | 0.06 |
| 203603_s_at  | <b>ZEB2</b>       | 9839 zinc finger E-box binding homeobox 2                | 3.46   | 0.00 |
| 202456_s_at  | <b>ZER1</b>       | 10444 zer-1 homolog (C. elegans)                         | -10.50 | 0.07 |
| 226168_at    | <b>ZFAND2B</b>    | 130617 zinc finger, AN1-type domain 2B                   | -2.20  | 0.25 |
| 217781_s_at  | <b>ZFP106</b>     | 64397 zinc finger protein 106 homolog (mouse)            | -2.23  | 0.07 |
| 211962_s_at  | <b>ZFP36L1</b>    | 677 zinc finger protein 36, C3H type-like 1              | -2.36  | 0.00 |
| 201368_at    | <b>ZFP36L2</b>    | 678 zinc finger protein 36, C3H type-like 2              | -3.92  | 0.00 |
| 231236_at    | <b>ZFP57</b>      | 346171 zinc finger protein 57 homolog (mouse)            | -2.26  | 0.00 |
| 213073_at    | <b>ZFYVE26</b>    | 23503 zinc finger, FYVE domain containing 26             | 4.61   | 0.08 |
| 226344_at    | <b>ZMAT1</b>      | 84460 zinc finger, matrin type 1                         | 2.01   | 0.79 |
| 210281_s_at  | <b>ZMYM2</b>      | 7750 zinc finger, MYM-type 2                             | -2.89  | 0.13 |
| 219924_s_at  | <b>ZMYM6</b>      | 9204 zinc finger, MYM-type 6                             | 2.26   | 0.34 |
| 1560854_s_at | <b>ZNF107</b>     | 51427 zinc finger protein 107                            | -8.51  | 0.07 |
| 204523_at    | <b>ZNF140</b>     | 7699 zinc finger protein 140                             | 4.28   | 0.16 |
| 200050_at    | <b>ZNF146</b>     | 7705 zinc finger protein 146                             | 2.57   | 0.02 |
| 208019_at    | <b>ZNF157</b>     | 7712 zinc finger protein 157                             | 2.19   | 0.06 |
| 226787_at    | <b>ZNF18</b>      | 7566 zinc finger protein 18                              | -6.45  | 0.51 |
| 213452_at    | <b>ZNF184</b>     | 7738 zinc finger protein 184                             | 6.01   | 0.02 |
| 203585_at    | <b>ZNF185</b>     | 7739 zinc finger protein 185 (LIM domain)                | -11.87 | 0.00 |
| 213218_at    | <b>ZNF187</b>     | 7741 zinc finger protein 187                             | -2.37  | 0.08 |
| 207513_s_at  | <b>ZNF189</b>     | 7743 zinc finger protein 189                             | 2.23   | 0.25 |
| 203739_at    | <b>ZNF217</b>     | 7764 zinc finger protein 217                             | -5.07  | 0.00 |
| 218005_at    | <b>ZNF22</b>      | 7570 zinc finger protein 22 (KOX 15)                     | 2.60   | 0.79 |
| 212774_at    | <b>ZNF238</b>     | 10472 zinc finger protein 238                            | -3.80  | 0.00 |
| 206862_at    | <b>ZNF254</b>     | 9534 zinc finger protein 254                             | -2.85  | 0.07 |
| 203707_at    | <b>ZNF263</b>     | 10127 zinc finger protein 263                            | 4.77   | 0.51 |
| 218645_at    | <b>ZNF277P</b>    | 11179 zinc finger protein 277 pseudogene                 | 3.59   | 0.00 |
| 218401_s_at  | <b>ZNF281</b>     | 23528 zinc finger protein 281                            | -3.38  | 0.03 |
| 225296_at    | <b>ZNF317</b>     | 57693 zinc finger protein 317                            | 2.93   | 0.00 |
| 203521_s_at  | <b>ZNF318</b>     | 24149 zinc finger protein 318                            | 4.50   | 0.51 |
| 213760_s_at  | <b>ZNF330</b>     | 27309 zinc finger protein 330                            | 2.62   | 0.16 |
| 231864_at    | <b>ZNF33A</b>     | 7581 zinc finger protein 33A                             | -3.82  | 0.00 |
| 215022_x_at  | <b>ZNF33B</b>     | 7582 zinc finger protein 33B                             | -3.23  | 0.00 |
| 207296_at    | <b>ZNF343</b>     | 79175 zinc finger protein 343                            | 3.54   | 0.34 |
| 205427_at    | <b>ZNF354A</b>    | 6940 zinc finger protein 354A                            | -2.29  | 0.16 |
| 226468_at    | <b>ZNF364</b>     | 27246 zinc finger protein 364                            | 5.84   | 0.00 |
| 229551_x_at  | <b>ZNF367</b>     | 195828 zinc finger protein 367                           | 2.71   | 0.08 |
| 228711_at    | <b>ZNF37A</b>     | 7587 zinc finger protein 37A                             | 3.72   | 0.25 |
|              | <b>ZNF37A ///</b> | 256112 ///                                               |        |      |
| 214878_at    | <b>ZNF37B</b>     | 7587 zinc finger protein 37A /// zinc finger protein 37B | 4.51   | 0.34 |
| 226111_s_at  | <b>ZNF385</b>     | 25946 zinc finger protein 385                            | 2.13   | 0.79 |
| 229743_at    | <b>ZNF438</b>     | 220929 zinc finger protein 438                           | 2.28   | 0.13 |
| 214746_s_at  | <b>ZNF467</b>     | 168544 zinc finger protein 467                           | -7.15  | 0.00 |
| 214751_at    | <b>ZNF468</b>     | 90333 zinc finger protein 468                            | 3.37   | 0.51 |
| 222283_at    | <b>ZNF480</b>     | 147657 zinc finger protein 480                           | 6.53   | 0.00 |
| 203604_at    | <b>ZNF516</b>     | 9658 zinc finger protein 516                             | -3.54  | 0.25 |
| 219711_at    | <b>ZNF586</b>     | 54807 zinc finger protein 586                            | -5.95  | 0.00 |
| 227507_at    | <b>ZNF592</b>     | 9640 zinc finger protein 592                             | -3.79  | 0.07 |
| 204175_at    | <b>ZNF593</b>     | 51042 zinc finger protein 593                            | 11.72  | 0.79 |

|             |               |                                                    |       |      |
|-------------|---------------|----------------------------------------------------|-------|------|
| 232367_x_at | <b>ZNF598</b> | 90850 zinc finger protein 598                      | -4.93 | 0.07 |
| 227045_at   | <b>ZNF614</b> | 80110 zinc finger protein 614                      | 4.47  | 0.51 |
| 1552643_at  | <b>ZNF626</b> | 199777 zinc finger protein 626                     | -2.56 | 0.34 |
| 226509_at   | <b>ZNF641</b> | 121274 zinc finger protein 641                     | -3.34 | 0.13 |
| 230029_x_at | <b>ZNF650</b> | 130507 zinc finger protein 650                     | -3.15 | 0.34 |
| 225266_at   | <b>ZNF652</b> | 22834 zinc finger protein 652                      | -8.38 | 0.00 |
| 227445_at   | <b>ZNF689</b> | 115509 zinc finger protein 689                     | -4.26 | 0.16 |
| 227080_at   | <b>ZNF697</b> | 90874 zinc finger protein 697                      | 4.62  | 0.08 |
| 235997_at   | <b>ZNF74</b>  | 7625 zinc finger protein 74                        | -2.12 | 0.03 |
| 225848_at   | <b>ZNF746</b> | 155061 zinc finger protein 746                     | -9.52 | 0.00 |
| 239838_at   | <b>ZNF776</b> | 284309 Zinc finger protein 776                     | -4.96 | 0.16 |
| 215758_x_at | <b>ZNF93</b>  | 81931 zinc finger protein 93                       | -2.65 | 0.08 |
| 223639_s_at | <b>ZNRD1</b>  | 30834 zinc ribbon domain containing 1              | 2.50  | 0.13 |
| 225131_at   | <b>ZRANB1</b> | 54764 zinc finger, RAN-binding domain containing 1 | -3.20 | 0.13 |
| 213097_s_at | <b>ZRF1</b>   | 27000 zuotin related factor 1                      | 3.56  | 0.16 |
| 225964_at   | <b>ZXDC</b>   | 79364 ZXD family zinc finger C                     | -3.81 | 0.79 |
| 225350_s_at | <b>ZYG11B</b> | 79699 zyg-11 homolog B (C. elegans)                | -8.73 | 0.07 |
| 200808_s_at | <b>ZYX</b>    | 7791 zyxin                                         | -4.31 | 0.00 |
| 207190_at   | <b>ZZEF1</b>  | 23140 zinc finger, ZZ-type with EF-hand domain 1   | -2.09 | 0.79 |
| 212893_at   | <b>ZZZ3</b>   | 26009 zinc finger, ZZ-type containing 3            | 5.68  | 0.51 |

### Gene expression significantly perturbed between GM+I and LPS (fold change = GM+I/LPS)

| Probeset ID  | Gene Symbol        | Gene ID   | Gene Name                                                                                    | Fold Change | q-value (%) |
|--------------|--------------------|-----------|----------------------------------------------------------------------------------------------|-------------|-------------|
| 235435_at    | <b>AASDH</b>       | 132949    | 2-aminoadipic 6-semialdehyde dehydrogenase<br>ATP-binding cassette, sub-family A (ABC1),     | 2.25        | 0.40        |
| 203504_s_at  | <b>ABCA1</b>       | 19        | member 1                                                                                     | -6.06       | 0.00        |
| 228490_at    | <b>ABHD2</b>       | 11057     | abhydrolase domain containing 2<br>v-abl Abelson murine leukemia viral oncogene              | 2.09        | 0.23        |
| 231907_at    | <b>ABL2</b>        | 27        | homolog 2 (arg, Abelson-related gene)                                                        | 2.85        | 0.63        |
| 201128_s_at  | <b>ACLY</b>        | 47        | ATP citrate lyase                                                                            | 3.68        | 0.18        |
| 218981_at    | <b>ACN9</b>        | 57001     | ACN9 homolog (S. cerevisiae)                                                                 | 5.90        | 0.40        |
| 201629_s_at  | <b>ACP1</b>        | 52        | acid phosphatase 1, soluble                                                                  | 5.50        | 0.63        |
| 206134_at    | <b>ADAMDEC1</b>    | 27299     | ADAM-like, decysin 1                                                                         | -21.71      | 0.44        |
| 225440_at    | <b>AGPAT3</b>      | 56894     | 1-acylglycerol-3-phosphate O-acyltransferase 3                                               | 7.62        | 0.63        |
| 214766_s_at  | <b>AHCTF1</b>      | 25909     | AT hook containing transcription factor 1                                                    | 2.49        | 0.63        |
| 205996_s_at  | <b>AK2</b>         | 204       | adenylate kinase 2<br>aldo-keto reductase family 1, member A1                                | 2.56        | 0.23        |
| 201900_s_at  | <b>AKR1A1</b>      | 10327     | (aldehyde reductase)                                                                         | 2.91        | 0.44        |
| 207016_s_at  | <b>ALDH1A2</b>     | 8854      | aldehyde dehydrogenase 1 family, member A2                                                   | 36.67       | 0.27        |
| 201612_at    | <b>ALDH9A1</b>     | 223       | aldehyde dehydrogenase 9 family, member A1                                                   | 2.27        | 0.90        |
| 226414_s_at  | <b>ANAPC11</b> /// | 51529 /// | APC11 anaphase promoting complex subunit 11<br>homolog (yeast) /// similar to APC11 anaphase |             |             |
| 238439_at    | <b>LOC728919</b>   | 728919    | promoting complex subunit 11 isoform 2                                                       | 2.06        | 0.63        |
| 201301_s_at  | <b>ANKRD22</b>     | 118932    | ankyrin repeat domain 22                                                                     | 5.73        | 0.00        |
| 210027_s_at  | <b>ANXA4</b>       | 307       | annexin A4<br>APEX nuclease (multifunctional DNA repair                                      | 3.73        | 0.00        |
| 209546_s_at  | <b>APEX1</b>       | 328       | enzyme) 1                                                                                    | 4.82        | 0.27        |
| 221087_s_at  | <b>APOL1</b>       | 8542      | apolipoprotein L, 1                                                                          | 2.25        | 0.00        |
| 223801_s_at  | <b>APOL3</b>       | 80833     | apolipoprotein L, 3                                                                          | 2.14        | 0.18        |
| 225173_at    | <b>APOL4</b>       | 80832     | apolipoprotein L, 4                                                                          | 5.36        | 0.27        |
| 201288_at    | <b>ARHGAP18</b>    | 93663     | Rho GTPase activating protein 18                                                             | 3.24        | 0.00        |
| 212614_at    | <b>ARHGDIB</b>     | 397       | Rho GDP dissociation inhibitor (GDI) beta                                                    | 2.49        | 0.11        |
| 1554480_a_at | <b>ARID5B</b>      | 84159     | AT rich interactive domain 5B (MRF1-like)                                                    | -2.77       | 0.63        |
|              | <b>ARMC10</b>      | 83787     | armadillo repeat containing 10                                                               | 2.13        | 0.18        |

|             |                     |                                                                                                             |        |      |
|-------------|---------------------|-------------------------------------------------------------------------------------------------------------|--------|------|
| 225283_at   | <b>ARRDC4</b>       | 91947 arrestin domain containing 4                                                                          | 3.18   | 0.63 |
| 212815_at   | <b>ASCC3</b>        | 10973 activating signal cointegrator 1 complex subunit 3                                                    | 8.53   | 0.11 |
| 227014_at   | <b>ASPHD2</b>       | 57168 aspartate beta-hydroxylase domain containing 2                                                        | 8.75   | 0.11 |
| 208758_at   | <b>ATIC</b>         | 5-aminoimidazole-4-carboxamide ribonucleotide<br>471 formyltransferase/IMP cyclohydrolase                   | 6.98   | 0.63 |
| 212672_at   | <b>ATM</b>          | 472 ataxia telangiectasia mutated                                                                           | 2.17   | 0.90 |
| 203454_s_at | <b>ATOX1</b>        | 475 ATX1 antioxidant protein 1 homolog (yeast)                                                              | 2.68   | 0.40 |
| 201243_s_at | <b>ATP1B1</b>       | 481 ATPase, Na <sup>+</sup> /K <sup>+</sup> transporting, beta 1 polypeptide                                | 6.78   | 0.23 |
| 215716_s_at | <b>ATP2B1</b>       | 490 ATPase, Ca <sup>++</sup> transporting, plasma membrane 1                                                | -2.37  | 0.00 |
| 213738_s_at | <b>ATP5A1</b>       | ATP synthase, H <sup>+</sup> transporting, mitochondrial F1<br>498 complex, alpha subunit 1, cardiac muscle | 2.45   | 0.63 |
| 207507_s_at | <b>ATP5G3</b>       | ATP synthase, H <sup>+</sup> transporting, mitochondrial F0<br>518 complex, subunit C3 (subunit 9)          | 2.97   | 0.18 |
| 209903_s_at | <b>ATR</b>          | 545 ataxia telangiectasia and Rad3 related                                                                  | 14.52  | 0.27 |
| 229791_at   | <b>AYTL1</b>        | 54947 Acyltransferase like 1<br>brain abundant, membrane attached signal                                    | 2.61   | 0.44 |
| 202391_at   | <b>BASP1</b>        | 10409 protein 1                                                                                             | -3.05  | 0.00 |
| 200837_at   | <b>BCAP31</b>       | 10134 B-cell receptor-associated protein 31                                                                 | 3.07   | 0.63 |
| 227322_s_at | <b>BCCIP</b>        | 56647 BRCA2 and CDKN1A interacting protein<br>basic helix-loop-helix domain containing, class B,            | 4.16   | 0.23 |
| 223185_s_at | <b>BHLHB3</b>       | 79365 3                                                                                                     | 25.81  | 0.00 |
| 229437_at   | <b>BIC</b>          | 114614 BIC transcript                                                                                       | 3.13   | 0.00 |
| 226530_at   | <b>BMF</b>          | 90427 Bcl2 modifying factor                                                                                 | -2.43  | 0.15 |
| 229436_x_at | <b>BRCC3</b>        | 79184 BRCA1/BRCA2-containing complex, subunit 3                                                             | 7.74   | 0.44 |
| 217945_at   | <b>BTBD1</b>        | 53339 BTB (POZ) domain containing 1                                                                         | 5.10   | 0.18 |
| 205504_at   | <b>BTK</b>          | 695 Bruton agammaglobulinemia tyrosine kinase                                                               | 2.60   | 0.44 |
| 222464_s_at | <b>C10orf119</b>    | 79892 chromosome 10 open reading frame 119                                                                  | 2.39   | 0.00 |
| 228332_s_at | <b>C11orf31</b>     | 280636 chromosome 11 open reading frame 31                                                                  | 3.45   | 0.11 |
| 222613_at   | <b>C12orf4</b>      | 57102 chromosome 12 open reading frame 4                                                                    | 4.37   | 0.00 |
| 228193_s_at | <b>C13orf15</b>     | 28984 Chromosome 13 open reading frame 15                                                                   | 6.66   | 0.44 |
| 219471_at   | <b>C13orf18</b>     | 80183 chromosome 13 open reading frame 18                                                                   | -3.58  | 0.00 |
| 221434_s_at | <b>C14orf156</b>    | 81892 chromosome 14 open reading frame 156                                                                  | 2.20   | 0.11 |
| 225980_at   | <b>C14orf43</b>     | 91748 chromosome 14 open reading frame 43                                                                   | 3.28   | 0.40 |
| 213105_s_at | <b>C16orf42</b>     | 115939 chromosome 16 open reading frame 42                                                                  | 2.04   | 0.27 |
|             |                     | chromosome 17 open reading frame 49 /// similar                                                             |        |      |
|             | <b>C17orf49 ///</b> | 124944 /// to DNA segment, Chr 11, Brigham & Womens                                                         |        |      |
| 224574_at   | <b>MGC71993</b>     | 440400 Genetics 0434 expressed                                                                              | 2.99   | 0.11 |
| 225967_s_at | <b>C17orf89</b>     | 284184 chromosome 17 open reading frame 89                                                                  | 3.16   | 0.40 |
| 221764_at   | <b>C19orf22</b>     | 91300 chromosome 19 open reading frame 22                                                                   | -2.05  | 0.15 |
| 221587_s_at | <b>C19orf24</b>     | 55009 chromosome 19 open reading frame 24                                                                   | 2.00   | 0.00 |
| 235515_at   | <b>C19orf46</b>     | 163183 chromosome 19 open reading frame 46                                                                  | -2.68  | 0.40 |
| 221335_x_at | <b>C19orf61</b>     | 56006 chromosome 19 open reading frame 61                                                                   | -2.05  | 0.27 |
| 219283_at   | <b>C1GALT1C1</b>    | 29071 C1GALT1-specific chaperone 1                                                                          | 3.95   | 0.00 |
| 219875_s_at | <b>C1orf121</b>     | 51029 chromosome 1 open reading frame 121                                                                   | 2.51   | 0.90 |
| 223124_s_at | <b>C1orf128</b>     | 57095 chromosome 1 open reading frame 128                                                                   | 2.12   | 0.44 |
|             | <b>C1orf136 ///</b> | 27185 /// disrupted in schizophrenia 1 /// chromosome 1                                                     |        |      |
| 207759_s_at | <b>DISC1</b>        | 400574 open reading frame 136                                                                               | -2.12  | 0.40 |
| 224867_at   | <b>C1orf151</b>     | 440574 chromosome 1 open reading frame 151                                                                  | 2.90   | 0.11 |
| 219506_at   | <b>C1orf54</b>      | 79630 chromosome 1 open reading frame 54<br>complement component 1, q subcomponent                          | 15.45  | 0.90 |
| 214214_s_at | <b>C1QBP</b>        | 708 binding protein                                                                                         | 5.67   | 0.40 |
| 231991_at   | <b>C20orf160</b>    | 140706 chromosome 20 open reading frame 160                                                                 | -17.83 | 0.15 |

|              |                    |            |                                                                                                                                     |            |
|--------------|--------------------|------------|-------------------------------------------------------------------------------------------------------------------------------------|------------|
|              |                    | 51072 ///  |                                                                                                                                     |            |
|              | <b>C2orf4P</b> /// | 728556 /// | Methylation modifier for class I HLA ///                                                                                            |            |
| 219065_s_at  | <b>MEMO1</b>       | 7795       | cell motility 1 ///                                                                                                                 | 3.58 0.11  |
|              | <b>C2orf59</b> /// | 112597 /// | chromosome 2 open reading frame 59 ///                                                                                              |            |
| 225799_at    | <b>LOC541471</b>   | 541471     | hypothetical LOC541471                                                                                                              | 2.93 0.00  |
| 231010_at    | <b>C4orf16</b>     | 55435      | Chromosome 4 open reading frame 16                                                                                                  | 2.07 0.63  |
| 227856_at    | <b>C4orf32</b>     | 132720     | chromosome 4 open reading frame 32                                                                                                  | 4.29 0.27  |
| 218233_s_at  | <b>C6orf49</b>     | 29964      | chromosome 6 open reading frame 49                                                                                                  | 4.57 0.00  |
| 215380_s_at  | <b>C7orf24</b>     | 79017      | chromosome 7 open reading frame 24                                                                                                  | 4.84 0.27  |
| 226386_at    | <b>C7orf30</b>     | 115416     | chromosome 7 open reading frame 30                                                                                                  | 2.54 0.18  |
| 225604_s_at  | <b>C9orf19</b>     | 152007     | chromosome 9 open reading frame 19                                                                                                  | 2.83 0.40  |
| 203963_at    | <b>CA12</b>        | 771        | carbonic anhydrase XII                                                                                                              | -3.51 0.63 |
| 210691_s_at  | <b>CACYBP</b>      | 27101      | calcyclin binding protein                                                                                                           | 2.77 0.18  |
| 214845_s_at  | <b>CALU</b>        | 813        | calumenin                                                                                                                           | 2.28 0.11  |
| 235626_at    | <b>CAMK1D</b>      | 57118      | calcium/calmodulin-dependent protein kinase ID                                                                                      | 2.94 0.63  |
| 207500_at    | <b>CASP5</b>       | 838        | caspase 5, apoptosis-related cysteine peptidase                                                                                     | -3.54 0.00 |
| 206788_s_at  | <b>CBFB</b>        | 865        | core-binding factor, beta subunit                                                                                                   | 2.09 0.44  |
| 209213_at    | <b>CBR1</b>        | 873        | carbonyl reductase 1                                                                                                                | 2.95 0.11  |
| 226193_x_at  | <b>CBWD1</b>       | 55871      | COBW domain containing 1                                                                                                            | 2.40 0.44  |
| 235208_at    | <b>CCDC112</b>     | 153733     | coiled-coil domain containing 112                                                                                                   | 8.09 0.11  |
| 226011_at    | <b>CCDC12</b>      | 151903     | coiled-coil domain containing 12                                                                                                    | 2.68 0.23  |
| 216714_at    | <b>CCL13</b>       | 6357       | chemokine (C-C motif) ligand 13                                                                                                     | 21.15 0.11 |
| 207900_at    | <b>CCL17</b>       | 6361       | chemokine (C-C motif) ligand 17                                                                                                     | 5.83 0.63  |
| 205476_at    | <b>CCL20</b>       | 6364       | chemokine (C-C motif) ligand 20                                                                                                     | -2.50 0.00 |
| 208075_s_at  | <b>CCL7</b>        | 6354       | chemokine (C-C motif) ligand 7                                                                                                      | 17.41 0.00 |
| 214038_at    | <b>CCL8</b>        | 6355       | chemokine (C-C motif) ligand 8                                                                                                      | 7.06 0.11  |
| 200953_s_at  | <b>CCND2</b>       | 894        | cyclin D2                                                                                                                           | 3.15 0.00  |
| 201947_s_at  | <b>CCT2</b>        | 10576      | chaperonin containing TCP1, subunit 2 (beta)                                                                                        | 2.64 0.00  |
| 200877_at    | <b>CCT4</b>        | 10575      | chaperonin containing TCP1, subunit 4 (delta)                                                                                       | 4.86 0.40  |
| 201327_s_at  | <b>CCT6A</b>       | 908        | chaperonin containing TCP1, subunit 6A (zeta 1)                                                                                     | 3.88 0.11  |
| 200873_s_at  | <b>CCT8</b>        | 10694      | chaperonin containing TCP1, subunit 8 (theta)                                                                                       | 2.42 0.40  |
| 215784_at    | <b>CD1E</b>        | 913        | CD1e molecule                                                                                                                       | 18.19 0.27 |
| 207277_at    | <b>CD209</b>       | 30835      | CD209 molecule                                                                                                                      | 15.11 0.18 |
|              | <b>CD22</b> ///    | 4099 ///   |                                                                                                                                     |            |
| 217422_s_at  | <b>MAG</b>         | 933        | CD22 molecule ///                                                                                                                   | -3.41 0.00 |
| 207315_at    | <b>CD226</b>       | 10666      | CD226 molecule                                                                                                                      | 5.00 0.00  |
| 1553043_a_at | <b>CD300LF</b>     | 146722     | CD300 molecule-like family member f                                                                                                 | 2.47 0.00  |
| 206488_s_at  | <b>CD36</b>        | 948        | CD36 molecule (thrombospondin receptor)                                                                                             | 7.15 0.23  |
| 208783_s_at  | <b>CD46</b>        | 4179       | CD46 molecule, complement regulatory protein                                                                                        | 2.28 0.00  |
| 237759_at    | <b>CD48</b>        | 962        | CD48 molecule                                                                                                                       | -4.84 0.00 |
| 204661_at    | <b>CD52</b>        | 1043       | CD52 molecule                                                                                                                       | 12.71 0.00 |
| 209795_at    | <b>CD69</b>        | 969        | CD69 molecule                                                                                                                       | 2.41 0.11  |
| 1567627_at   | <b>CD74</b>        | 972        | class II invariant chain                                                                                                            | 6.66 0.00  |
| 203904_x_at  | <b>CD82</b>        | 3732       | CD82 molecule                                                                                                                       | -3.23 0.00 |
| 210895_s_at  | <b>CD86</b>        | 942        | CD86 molecule                                                                                                                       | 3.14 0.27  |
| 201725_at    | <b>CDC123</b>      | 8872       | cell division cycle 123 homolog (S. cerevisiae)<br>GDP-diacylglycerol--inositol 3-<br>phosphatidyltransferase (phosphatidylinositol | 2.28 0.63  |
| 201253_s_at  | <b>CDIPT</b>       | 10423      | synthase)<br>cat eye syndrome chromosome region, candidate                                                                          | 3.36 0.00  |
| 219505_at    | <b>CECR1</b>       | 51816      | 1                                                                                                                                   | 4.24 0.27  |
| 213618_at    | <b>CENTD1</b>      | 116984     | centaurin, delta 1                                                                                                                  | 3.60 0.00  |

|              |                     |                                                                                               |        |      |
|--------------|---------------------|-----------------------------------------------------------------------------------------------|--------|------|
| 212516_at    | <b>CENTD2</b>       | 116985 centaurin, delta 2                                                                     | -2.35  | 0.44 |
| 202357_s_at  | <b>CFB</b>          | 629 complement factor B                                                                       | -2.41  | 0.23 |
| 206932_at    | <b>CH25H</b>        | 9023 cholesterol 25-hydroxylase                                                               | 11.54  | 0.11 |
| 209396_s_at  | <b>CHI3L1</b>       | 1116 chitinase 3-like 1 (cartilage glycoprotein-39) carbohydrate (N-acetylglucosamine 6-O)    | -2.53  | 0.00 |
| 206756_at    | <b>CHST7</b>        | 56548 sulfotransferase 7 class II, major histocompatibility complex,                          | -2.76  | 0.27 |
| 211884_s_at  | <b>CIITA</b>        | 4261 transactivator                                                                           | 2.95   | 0.63 |
| 223377_x_at  | <b>CISH</b>         | 1154 cytokine inducible SH2-containing protein                                                | 4.19   | 0.00 |
| 221058_s_at  | <b>CKLF</b>         | 51192 chemokine-like factor CNDP dipeptidase 2 (metallopeptidase M20                          | 2.32   | 0.00 |
| 217752_s_at  | <b>CNDP2</b>        | 55748 family)                                                                                 | 3.19   | 0.00 |
| 1552344_s_at | <b>CNOT7</b>        | 29883 CCR4-NOT transcription complex, subunit 7                                               | 3.42   | 0.11 |
| 208818_s_at  | <b>COMT</b>         | 1312 catechol-O-methyltransferase                                                             | 3.49   | 0.90 |
| 224583_at    | <b>COTL1</b>        | 23406 coactosin-like 1 (Dictyostelium)                                                        | 2.37   | 0.44 |
| 208146_s_at  | <b>CPVL</b>         | 54504 carboxypeptidase, vitellogenic-like                                                     | 2.47   | 0.44 |
| 207442_at    | <b>CSF3</b>         | 1440 colony stimulating factor 3 (granulocyte)                                                | -55.23 | 0.00 |
| 229212_at    | <b>CSNK2A1</b>      | 1457 Casein kinase 2, alpha 1 polypeptide                                                     | 2.72   | 0.90 |
| 213980_s_at  | <b>CTBP1</b>        | 1487 C-terminal binding protein 1                                                             | 2.04   | 0.44 |
| 201487_at    | <b>CTSC</b>         | 1075 cathepsin C                                                                              | 5.49   | 0.00 |
| 202157_s_at  | <b>CUGBP2</b>       | 10659 CUG triplet repeat, RNA binding protein 2                                               | 2.20   | 0.40 |
| 205898_at    | <b>CX3CR1</b>       | 1524 chemokine (C-X3-C motif) receptor 1                                                      | -5.33  | 0.44 |
| 204533_at    | <b>CXCL10</b>       | 3627 chemokine (C-X-C motif) ligand 10                                                        | 6.68   | 0.00 |
| 211122_s_at  | <b>CXCL11</b>       | 6373 chemokine (C-X-C motif) ligand 11                                                        | 9.06   | 0.00 |
| 203915_at    | <b>CXCL9</b>        | 4283 chemokine (C-X-C motif) ligand 9                                                         | 9.95   | 0.23 |
|              | <b>CXorf40A ///</b> | 541578 ///<br>chromosome X open reading frame 40A ///                                         |        |      |
| 214112_s_at  | <b>CXorf40B</b>     | 91966 chromosome X open reading frame 40B                                                     | 3.93   | 0.44 |
| 215785_s_at  | <b>CYFIP2</b>       | 26999 cytoplasmic FMR1 interacting protein 2 DNA segment, Chr 15, Wayne State University      | -2.93  | 0.63 |
| 212527_at    | <b>D15Wsu75e</b>    | 27351 75, expressed                                                                           | 2.15   | 0.11 |
| 226620_x_at  | <b>DAZAP1</b>       | 26528 DAZ associated protein 1                                                                | 2.30   | 0.23 |
| 203302_at    | <b>DCK</b>          | 1633 deoxycytidine kinase DCN1, defective in cullin neddylation 1, domain                     | 2.81   | 0.90 |
| 239648_at    | <b>DCUN1D3</b>      | 123879 containing 3 (S. cerevisiae)                                                           | 2.96   | 0.11 |
| 202887_s_at  | <b>DDIT4</b>        | 54541 DNA-damage-inducible transcript 4 degenerative spermatocyte homolog 1, lipid            | -2.16  | 0.90 |
| 207431_s_at  | <b>DEGS1</b>        | 8560 desaturase (Drosophila)                                                                  | 2.36   | 0.63 |
| 200934_at    | <b>DEK</b>          | 7913 DEK oncogene (DNA binding) dehydrogenase/reductase (SDR family) member                   | 2.11   | 0.44 |
| 226121_at    | <b>DHRS13</b>       | 147015 13                                                                                     | -2.46  | 0.63 |
| 223365_at    | <b>DHX37</b>        | 57647 DEAH (Asp-Glu-Ala-His) box polypeptide 37 DIM1 dimethyladenosine transferase 1-like (S. | 3.28   | 0.63 |
| 204405_x_at  | <b>DIMT1L</b>       | 27292 cerevisiae)                                                                             | 2.40   | 0.00 |
| 216212_s_at  | <b>DKC1</b>         | 1736 dyskeratosis congenita 1, dyskerin                                                       | 4.26   | 0.11 |
|              | <b>DKFZp667G</b>    |                                                                                               |        |      |
| 214030_at    | <b>2110</b>         | 131544 hypothetical protein DKFZp667G2110                                                     | 4.79   | 0.44 |
| 202516_s_at  | <b>DLG1</b>         | 1739 discs, large homolog 1 (Drosophila)                                                      | 2.82   | 0.18 |
| 202500_at    | <b>DNAJB2</b>       | 3300 DnaJ (Hsp40) homolog, subfamily B, member 2                                              | 3.70   | 0.63 |
| 225174_at    | <b>DNAJC10</b>      | 54431 DnaJ (Hsp40) homolog, subfamily C, member 10                                            | 4.43   | 0.27 |
| 218435_at    | <b>DNAJC15</b>      | 29103 DnaJ (Hsp40) homolog, subfamily C, member 15                                            | 3.65   | 0.63 |
| 202416_at    | <b>DNAJC7</b>       | 7266 DnaJ (Hsp40) homolog, subfamily C, member 7                                              | 2.59   | 0.40 |
| 223553_s_at  | <b>DOK3</b>         | 79930 docking protein 3                                                                       | -2.99  | 0.15 |
| 224336_s_at  | <b>DUSP16</b>       | 80824 dual specificity phosphatase 16                                                         | -5.47  | 0.00 |



|             |                    |                                                                |        |      |
|-------------|--------------------|----------------------------------------------------------------|--------|------|
| 209457_at   | <b>DUSP5</b>       | 1847 dual specificity phosphatase 5                            | 2.06   | 0.40 |
| 210151_s_at | <b>DYRK3</b>       | 8444 regulated kinase 3                                        | -2.62  | 0.63 |
| 223088_x_at | <b>ECHDC1</b>      | 55862 enoyl Coenzyme A hydratase domain containing 1           | 2.77   | 0.00 |
| 209059_s_at | <b>EDF1</b>        | 8721 endothelial differentiation-related factor 1              | 2.00   | 0.18 |
| 204038_s_at | <b>EDG2</b>        | 1902 protein-coupled receptor, 2                               | 2.99   | 0.40 |
|             | <b>EEF1B2</b> ///  |                                                                |        |      |
|             | <b>hCG_19809</b>   |                                                                |        |      |
|             | ///                | 1933 /// eukaryotic translation elongation factor 1 beta 2 /// |        |      |
|             | <b>hCG_198305</b>  | 644820 /// hCG1983058 /// eukaryotic translation elongation    |        |      |
| 200705_s_at | <b>8</b>           | 647030 factor 1 beta 2-like                                    | 2.51   | 0.00 |
| 233375_at   | <b>EFCAB2</b>      | 84288 EF-hand calcium binding domain 2                         | 16.19  | 0.00 |
|             |                    | early growth response 2 (Krox-20 homolog,                      |        |      |
| 205249_at   | <b>EGR2</b>        | 1959 Drosophila)                                               | 5.03   | 0.18 |
|             |                    | eukaryotic translation initiation factor 1A, X-linked          |        |      |
|             | <b>EIF1AP1</b> /// | 1964 /// /// eukaryotic translation initiation factor 1A       |        |      |
| 201019_s_at | <b>EIF1AX</b>      | 280661 pseudogene 1                                            | 2.14   | 0.63 |
|             |                    | eukaryotic translation initiation factor 2-alpha               |        |      |
| 217736_s_at | <b>EIF2AK1</b>     | 27102 kinase 1                                                 | 4.03   | 0.00 |
|             |                    | eukaryotic translation initiation factor 2, subunit 1          |        |      |
| 201143_s_at | <b>EIF2S1</b>      | 1965 alpha, 35kDa                                              | 3.23   | 0.23 |
| 208697_s_at | <b>EIF3E</b>       | 3646 eukaryotic translation initiation factor 3, subunit E     | 2.44   | 0.00 |
| 221494_x_at | <b>EIF3K</b>       | 27335 eukaryotic translation initiation factor 3, subunit K    | 2.96   | 0.11 |
| 202232_s_at | <b>EIF3M</b>       | 10480 eukaryotic translation initiation factor 3, subunit M    | 3.76   | 0.11 |
|             |                    | eukaryotic translation initiation factor 4E family             |        |      |
| 225940_at   | <b>EIF4E3</b>      | 317649 member 3                                                | 2.51   | 0.00 |
| 214313_s_at | <b>EIF5B</b>       | 9669 Eukaryotic translation initiation factor 5B               | 3.14   | 0.23 |
| 226099_at   | <b>ELL2</b>        | 22936 elongation factor, RNA polymerase II, 2                  | -2.10  | 0.27 |
| 227075_at   | <b>ELP3</b>        | 55140 elongation protein 3 homolog (S. cerevisiae)             | 2.33   | 0.90 |
| 209233_at   | <b>EMG1</b>        | 10436 EMG1 nucleolar protein homolog (S. cerevisiae)           | 4.04   | 0.11 |
| 228673_s_at | <b>EML4</b>        | 27436 Echinoderm microtubule associated protein like 4         | 2.95   | 0.00 |
|             |                    | egf-like module containing, mucin-like, hormone                |        |      |
| 207111_at   | <b>EMR1</b>        | 2015 receptor-like 1                                           | -5.76  | 0.00 |
| 202909_at   | <b>EPM2AIP1</b>    | 9852 EPM2A (laforin) interacting protein 1                     | -2.90  | 0.44 |
|             |                    | epidermal growth factor receptor pathway                       |        |      |
| 221056_x_at | <b>EPS15L1</b>     | 58513 substrate 15-like 1                                      | -6.82  | 0.90 |
| 227017_at   | <b>ERICH1</b>      | 157697 glutamate-rich 1                                        | 4.56   | 0.11 |
| 202441_at   | <b>ERLIN1</b>      | 10613 ER lipid raft associated 1                               | 4.07   | 0.23 |
|             |                    | electron-transfer-flavoprotein, alpha polypeptide              |        |      |
| 201931_at   | <b>ETFA</b>        | 2108 (glutaric aciduria II)                                    | 2.99   | 0.63 |
| 203349_s_at | <b>ETV5</b>        | 2119 ets variant gene 5 (ets-related molecule)                 | -11.64 | 0.00 |
| 235056_at   | <b>ETV6</b>        | 2120 ets variant gene 6 (TEL oncogene)                         | 2.04   | 0.63 |
| 221680_s_at | <b>ETV7</b>        | 51513 ets variant gene 7 (TEL2 oncogene)                       | 2.55   | 0.00 |
| 226259_at   | <b>EXOC6</b>       | 54536 exocyst complex component 6                              | 4.90   | 0.27 |
| 212627_s_at | <b>EXOSC7</b>      | 23016 exosome component 7                                      | 3.05   | 0.90 |
|             |                    | coagulation factor III (thromboplastin, tissue                 |        |      |
| 204363_at   | <b>F3</b>          | 2152 factor)                                                   | 6.31   | 0.11 |
|             | <b>FABP5</b> ///   | fatty acid binding protein 5 (psoriasis-associated)            |        |      |
|             | <b>LOC728641</b>   | 2171 /// /// similar to Fatty acid-binding protein, epidermal  |        |      |
|             | ///                | 728641 /// (E-FABP) (Psoriasis-associated fatty acid-binding   |        |      |
| 202345_s_at | <b>LOC729163</b>   | 729163 protein homolog) (PA-FABP)                              | 3.75   | 0.90 |
| 218532_s_at | <b>FAM134B</b>     | 54463 family with sequence similarity 134, member B            | -4.81  | 0.00 |

|              |                   |                                                                                                     |        |      |
|--------------|-------------------|-----------------------------------------------------------------------------------------------------|--------|------|
| 228362_s_at  | <b>FAM26F</b>     | 441168 Family with sequence similarity 26, member F                                                 | 9.10   | 0.00 |
| 224824_at    | <b>FAM36A</b>     | 116228 family with sequence similarity 36, member A                                                 | 2.33   | 0.11 |
| 218126_at    | <b>FAM82C</b>     | 55177 family with sequence similarity 82, member C                                                  | 2.85   | 0.18 |
| 218074_at    | <b>FAM96B</b>     | 51647 family with sequence similarity 96, member B                                                  | 2.85   | 0.27 |
| 204781_s_at  | <b>FAS</b>        | 355 Fas (TNF receptor superfamily, member 6)                                                        | 2.47   | 0.11 |
| 219200_at    | <b>FASTKD3</b>    | 79072 FAST kinase domains 3                                                                         | 3.01   | 0.40 |
| 209696_at    | <b>FBP1</b>       | 2203 fructose-1,6-bisphosphatase 1                                                                  | 28.89  | 0.11 |
| 235089_at    | <b>FBXL20</b>     | 84961 F-box and leucine-rich repeat protein 20<br>Fc fragment of IgG, high affinity Ia, receptor    | -5.47  | 0.44 |
| 216951_at    | <b>FCGR1A</b>     | 2209 (CD64)<br>Fc fragment of IgG, high affinity Ib, receptor                                       | 2.60   | 0.00 |
| 214511_x_at  | <b>FCGR1B</b>     | 2210 (CD64)<br>Fc fragment of IgG, low affinity IIb, receptor                                       | 2.02   | 0.00 |
| 210889_s_at  | <b>FCGR2B</b> /// | 2213 /// (CD32) /// Fc fragment of IgG, low affinity IIc,                                           |        |      |
| 218831_s_at  | <b>FCGR2C</b>     | 9103 receptor for (CD32)                                                                            | 7.89   | 0.23 |
|              | <b>FCGRT</b>      | 2217 Fc fragment of IgG, receptor, transporter, alpha                                               | 2.15   | 0.23 |
| 205237_at    | <b>FCN1</b>       | 2219 ficolin (collagen/fibrinogen domain containing) 1                                              | 7.26   | 0.44 |
| 201798_s_at  | <b>FER1L3</b>     | 26509 fer-1-like 3, myoferlin (C. elegans)                                                          | 18.18  | 0.90 |
| 1553906_s_at | <b>FGD2</b>       | 221472 FYVE, RhoGEF and PH domain containing 2                                                      | 4.82   | 0.40 |
| 227265_at    | <b>FGL2</b>       | 10875 fibrinogen-like 2                                                                             | 8.49   | 0.00 |
| 200895_s_at  | <b>FKBP4</b>      | 2288 FK506 binding protein 4, 59kDa                                                                 | 3.25   | 0.63 |
| 228149_at    | <b>FLJ31818</b>   | 154743 hypothetical protein FLJ31818                                                                | -3.34  | 0.44 |
| 1566760_at   | <b>FLJ34208</b>   | 401106 hypothetical gene supported by AK091527                                                      | -8.21  | 0.27 |
| 216442_x_at  | <b>FN1</b>        | 2335 fibronectin 1                                                                                  | 6.90   | 0.00 |
| 225262_at    | <b>FOSL2</b>      | 2355 FOS-like antigen 2                                                                             | -5.24  | 0.00 |
| 203734_at    | <b>FOXJ2</b>      | 55810 forkhead box J2                                                                               | -3.21  | 0.18 |
| 214560_at    | <b>FPRL2</b>      | 2359 formyl peptide receptor-like 2                                                                 | 13.59  | 0.00 |
| 223120_at    | <b>FUCA2</b>      | 2519 fucosidase, alpha-L- 2, plasma                                                                 | 7.72   | 0.18 |
| 223042_s_at  | <b>FUNDC2</b>     | 65991 FUN14 domain containing 2                                                                     | 5.53   | 0.27 |
| 202419_at    | <b>FVT1</b>       | 2531 follicular lymphoma variant translocation 1                                                    | 5.19   | 0.00 |
| 224641_at    | <b>FYTTD1</b>     | 84248 forty-two-three domain containing 1                                                           | 2.35   | 0.00 |
| 213280_at    | <b>GARNL4</b>     | 23108 GTPase activating Rap/RanGAP domain-like 4                                                    | 2.96   | 0.44 |
| 232024_at    | <b>GIMAP2</b>     | 26157 GTPase, IMAP family member 2                                                                  | 2.97   | 0.63 |
| 219243_at    | <b>GIMAP4</b>     | 55303 GTPase, IMAP family member 4                                                                  | 2.73   | 0.00 |
| 64064_at     | <b>GIMAP5</b>     | 55340 GTPase, IMAP family member 5                                                                  | 2.68   | 0.00 |
| 235306_at    | <b>GIMAP8</b>     | 155038 GTPase, IMAP family member 8                                                                 | 3.94   | 0.18 |
| 223278_at    | <b>GJB2</b>       | 2706 gap junction protein, beta 2, 26kDa                                                            | -50.90 | 0.00 |
| 223079_s_at  | <b>GLS</b>        | 2744 glutaminase                                                                                    | 2.39   | 0.63 |
| 218473_s_at  | <b>GLT25D1</b>    | 79709 glycosyltransferase 25 domain containing 1                                                    | 2.27   | 0.11 |
| 215794_x_at  | <b>GLUD2</b>      | 2747 glutamate dehydrogenase 2<br>guanine nucleotide binding protein (G protein),                   | 3.25   | 0.18 |
| 223487_x_at  | <b>GNB4</b>       | 59345 beta polypeptide 4<br>guanine nucleotide binding protein-like 3                               | 4.16   | 0.11 |
| 217850_at    | <b>GNL3</b>       | 26354 (nucleolar)                                                                                   | 2.84   | 0.40 |
| 223887_at    | <b>GPR132</b>     | 29933 G protein-coupled receptor 132                                                                | -2.55  | 0.15 |
| 204137_at    | <b>GPR137B</b>    | 7107 G protein-coupled receptor 137B                                                                | -5.64  | 0.23 |
| 200736_s_at  | <b>GPX1</b>       | 2876 glutathione peroxidase 1                                                                       | 2.28   | 0.63 |
| 216308_x_at  | <b>GRHPR</b>      | 9380 glyoxylate reductase/hydroxypyruvate reductase                                                 | 3.57   | 0.40 |
| 200696_s_at  | <b>GSN</b>        | 2934 gelsolin (amyloidosis, Finnish type)                                                           | 3.43   | 0.11 |
| 201912_s_at  | <b>GSPT1</b>      | 2935 G1 to S phase transition 1                                                                     | 4.86   | 0.27 |
| 225609_at    | <b>GSR</b>        | 2936 glutathione reductase                                                                          | 2.63   | 0.00 |
| 202678_at    | <b>GTF2A2</b>     | 2958 general transcription factor IIA, 2, 12kDa<br>general transcription factor IIF, polypeptide 2, | 2.30   | 0.00 |
| 209595_at    | <b>GTF2F2</b>     | 2963 30kDa                                                                                          | 2.56   | 0.23 |
| 201338_x_at  | <b>GTF3A</b>      | 2971 general transcription factor IIIA                                                              | 3.60   | 0.00 |

|             |                         |                                                                                                                                                                                                       |        |      |
|-------------|-------------------------|-------------------------------------------------------------------------------------------------------------------------------------------------------------------------------------------------------|--------|------|
| 218238_at   | <b>GTPBP4</b>           | 23560 GTP binding protein 4                                                                                                                                                                           | 2.60   | 0.00 |
| 220577_at   | <b>GVIN1</b>            | 387751 GTPase, very large interferon inducible 1                                                                                                                                                      | 2.96   | 0.18 |
| 202947_s_at | <b>GYPC</b>             | 2995 glycophorin C (Gerbich blood group)                                                                                                                                                              | 2.55   | 0.00 |
| 206643_at   | <b>HAL</b>              | 3034 histidine ammonia-lyase                                                                                                                                                                          | -2.15  | 0.63 |
| 38037_at    | <b>HBEGF</b>            | 1839 heparin-binding EGF-like growth factor                                                                                                                                                           | 3.88   | 0.40 |
| 209102_s_at | <b>HBP1</b>             | 26959 HMG-box transcription factor 1                                                                                                                                                                  | -2.01  | 0.27 |
| 202474_s_at | <b>HCFC1</b>            | 3054 host cell factor C1 (VP16-accessory protein)                                                                                                                                                     | 5.24   | 0.90 |
|             |                         | SET translocation (myeloid leukemia-associated)<br>/// similar to Protein SET (Phosphatase 2A<br>inhibitor I2PP2A) (I-2PP2A) (Template-activating<br>factor I) (TAF-I) (HLA-DR-associated protein II) |        |      |
|             | <b>hCG_164460</b>       |                                                                                                                                                                                                       |        |      |
|             | <b>8 ///</b>            | 389168 ///                                                                                                                                                                                            |        |      |
|             | <b>LOC389168</b>        | 6418 ///                                                                                                                                                                                              |        |      |
| 215780_s_at | <b>/// SET</b>          | 642869 leukemia-associated) pseudogene                                                                                                                                                                | 3.15   | 0.00 |
|             | <b>hCG_199099</b>       |                                                                                                                                                                                                       |        |      |
|             | <b>7 ///</b>            |                                                                                                                                                                                                       |        |      |
|             | <b>HLA-DRB1 ///</b>     |                                                                                                                                                                                                       |        |      |
|             | <b>HLA-DRB3</b>         | 3123 ///                                                                                                                                                                                              |        |      |
|             | <b>/// HLA-DRB4 ///</b> | 3125 ///                                                                                                                                                                                              |        |      |
|             | <b>HLA-DRB5</b>         | 3126 ///                                                                                                                                                                                              |        |      |
|             | <b>///</b>              | 3127 ///                                                                                                                                                                                              |        |      |
|             |                         | 730415 ///                                                                                                                                                                                            |        |      |
| 221491_x_at | <b>LOC730415</b>        | 731247 LOC730415                                                                                                                                                                                      | 16.27  | 0.11 |
| 204225_at   | <b>HDAC4</b>            | 9759 histone deacetylase 4                                                                                                                                                                            | 2.93   | 0.63 |
| 213069_at   | <b>HEG1</b>             | 57493 HEG homolog 1 (zebrafish)                                                                                                                                                                       | 2.75   | 0.63 |
| 206183_s_at | <b>HERC3</b>            | 8916 hect domain and RLD 3                                                                                                                                                                            | 2.13   | 0.63 |
| 219863_at   | <b>HERC5</b>            | 51191 hect domain and RLD 5                                                                                                                                                                           | -3.56  | 0.15 |
| 201944_at   | <b>HEXB</b>             | 3074 hexosaminidase B (beta polypeptide)                                                                                                                                                              | 2.07   | 0.40 |
| 44783_s_at  | <b>HEY1</b>             | 23462 hairy/enhancer-of-split related with YRPW motif 1                                                                                                                                               | -25.97 | 0.18 |
| 223073_at   | <b>HIATL1</b>           | 84641 hippocampus abundant transcript-like 1                                                                                                                                                          | 2.01   | 0.00 |
| 218507_at   | <b>HIG2</b>             | 29923 hypoxia-inducible protein 2                                                                                                                                                                     | -3.75  | 0.90 |
| 217845_x_at | <b>HIGD1A</b>           | 25994 HIG1 domain family, member 1A                                                                                                                                                                   | 2.01   | 0.18 |
| 209329_x_at | <b>HIGD2A</b>           | 192286 HIG1 domain family, member 2A                                                                                                                                                                  | 2.82   | 0.40 |
| 217478_s_at | <b>HLA-DMA</b>          | 3108 alpha<br>major histocompatibility complex, class II, DM                                                                                                                                          | 9.26   | 0.00 |
| 203932_at   | <b>HLA-DMB</b>          | 3109 beta<br>major histocompatibility complex, class II, DP                                                                                                                                           | 7.01   | 0.00 |
| 211990_at   | <b>HLA-DPA1</b>         | 3113 alpha 1<br>major histocompatibility complex, class II, DP beta                                                                                                                                   | 18.23  | 0.00 |
| 201137_s_at | <b>HLA-DPB1</b>         | 3115 1<br>major histocompatibility complex, class II, DQ                                                                                                                                              | 11.82  | 0.00 |
| 213831_at   | <b>HLA-DQA1</b>         | 3117 alpha 1<br>major histocompatibility complex, class II, DQ                                                                                                                                        | 5.82   | 0.00 |
|             | <b>HLA-DQA1</b>         | alpha 1 ///                                                                                                                                                                                           |        |      |
|             | <b>/// HLA-DQA2 ///</b> | 3117 ///                                                                                                                                                                                              |        |      |
|             | <b>HLA-DQA2 ///</b>     | 3118 ///                                                                                                                                                                                              |        |      |
| 212671_s_at | <b>LOC731682</b>        | 731682 precursor (DC-4 alpha chain)<br>major histocompatibility complex, class II, DQ beta                                                                                                            | 11.80  | 0.00 |
| 211656_x_at | <b>HLA-DQB1</b>         | 3119 1<br>major histocompatibility complex, class II, DQ beta                                                                                                                                         | 12.68  | 0.00 |
|             | <b>HLA-DQB1</b>         | 1 ///                                                                                                                                                                                                 |        |      |
|             | <b>///</b>              | 3119 ///                                                                                                                                                                                              |        |      |
| 211654_x_at | <b>LOC650557</b>        | 650557 (DQB1*0501)<br>major histocompatibility complex, class II, DR                                                                                                                                  | 10.77  | 0.00 |
| 208894_at   | <b>HLA-DRA</b>          | 3122 alpha<br>Major histocompatibility complex, class II, DR beta                                                                                                                                     | 2.84   | 0.00 |
| 208306_x_at | <b>HLA-DRB1</b>         | 3123 1                                                                                                                                                                                                | 4.51   | 0.11 |

|             |                           |                   |                                                                                                                 |        |      |  |
|-------------|---------------------------|-------------------|-----------------------------------------------------------------------------------------------------------------|--------|------|--|
|             | <b>HLA-DRB1</b>           |                   |                                                                                                                 |        |      |  |
|             | /// HLA-DRB3              | 3123 /// 3125 /// | major histocompatibility complex, class II, DR beta 1 /// major histocompatibility complex, class II, DR beta 3 |        |      |  |
| 215193_x_at | <b>LOC730415 HLA-DRB1</b> | 730415            | hypothetical protein LOC730415                                                                                  | 8.75   | 0.00 |  |
|             | ///                       | 3123 ///          | major histocompatibility complex, class II, DR beta 1                                                           |        |      |  |
| 209312_x_at | <b>LOC730415</b>          | 730415            | hypothetical protein LOC730415                                                                                  | 5.50   | 0.00 |  |
|             |                           |                   | major histocompatibility complex, class II, DR beta                                                             |        |      |  |
| 209728_at   | <b>HLA-DRB4</b>           | 3126 4            |                                                                                                                 | 7.23   | 0.63 |  |
|             |                           |                   | major histocompatibility complex, class II, DR beta                                                             |        |      |  |
| 217362_x_at | <b>HLA-DRB6</b>           | 3128 6            | (pseudogene)                                                                                                    | 3.69   | 0.00 |  |
| 208766_s_at | <b>HNRNPR</b>             | 10236             | heterogeneous nuclear ribonucleoprotein R                                                                       | 2.39   | 0.00 |  |
| 201277_s_at | <b>HNRPAB</b>             | 3182              | heterogeneous nuclear ribonucleoprotein A/B heparan sulfate (glucosamine) 3-O-                                  | 3.38   | 0.18 |  |
| 227361_at   | <b>HS3ST3B1</b>           | 9953              | sulfotransferase 3B1                                                                                            | -2.20  | 0.00 |  |
|             |                           |                   | heat shock protein 90kDa alpha (cytosolic), class B member 1                                                    |        |      |  |
| 1557910_at  | <b>HSP90AB1 HSPA1A</b>    | 3326 /// 3303 /// | heat shock 70kDa protein 1A                                                                                     | 2.99   | 0.00 |  |
| 200800_s_at | <b>HSPA1B</b>             | 3304              | protein 1B                                                                                                      | -2.47  | 0.44 |  |
| 202581_at   | <b>HSPA1B</b>             | 3304              | heat shock 70kDa protein 1B                                                                                     | -3.21  | 0.00 |  |
| 213418_at   | <b>HSPA6</b>              | 3310              | heat shock 70kDa protein 6 (HSP70B')                                                                            | -2.20  | 0.15 |  |
| 200691_s_at | <b>HSPA9</b>              | 3313              | heat shock 70kDa protein 9 (mortalin)                                                                           | 3.07   | 0.00 |  |
| 203023_at   | <b>HSPC111</b>            | 51491             | hypothetical protein HSPC111                                                                                    | 2.37   | 0.18 |  |
| 221597_s_at | <b>HSPC171</b>            | 29100             | HSPC171 protein                                                                                                 | 2.08   | 0.18 |  |
| 200806_s_at | <b>HSPD1</b>              | 3329              | heat shock 60kDa protein 1 (chaperonin)                                                                         | 2.44   | 0.11 |  |
| 205133_s_at | <b>HSPE1</b>              | 3336              | heat shock 10kDa protein 1 (chaperonin 10)                                                                      | 2.82   | 0.00 |  |
| 233746_x_at | <b>HYPK</b>               | 25764             | Huntingtin interacting protein K                                                                                | 2.24   | 0.00 |  |
| 239012_at   | <b>IBRDC2</b>             | 255488            | IBR domain containing 2 inhibitor of DNA binding 2, dominant negative                                           | -2.87  | 0.00 |  |
| 201565_s_at | <b>ID2</b>                | 3398              | helix-loop-helix protein inhibitor of DNA binding 2, dominant negative                                          | -3.86  | 0.15 |  |
|             |                           |                   | helix-loop-helix protein                                                                                        |        |      |  |
|             |                           | 3398 ///          | inhibitor of DNA binding 2, dominant negative                                                                   |        |      |  |
| 213931_at   | <b>ID2 /// ID2B</b>       | 84099             | 2B, dominant negative helix-loop-helix protein                                                                  | -2.37  | 0.00 |  |
| 201193_at   | <b>IDH1</b>               | 3417              | isocitrate dehydrogenase 1 (NADP+), soluble                                                                     | 4.77   | 0.44 |  |
| 202070_s_at | <b>IDH3A</b>              | 3419              | isocitrate dehydrogenase 3 (NAD+) alpha                                                                         | 6.83   | 0.44 |  |
| 208881_x_at | <b>IDI1</b>               | 3422              | isopentenyl-diphosphate delta isomerase 1                                                                       | 2.72   | 0.11 |  |
| 214453_s_at | <b>IFI44</b>              | 10561             | interferon-induced protein 44 interferon-induced protein with tetratricopeptide                                 | -2.13  | 0.40 |  |
| 203153_at   | <b>IFIT1</b>              | 3434              | repeats 1                                                                                                       | -9.43  | 0.00 |  |
| 204786_s_at | <b>IFNAR2</b>             | 3455              | interferon (alpha, beta and omega) receptor 2 intraflagellar transport 57 homolog                               | 2.02   | 0.40 |  |
| 218100_s_at | <b>IFT57</b>              | 55081             | (Chlamydomonas)                                                                                                 | -6.03  | 0.40 |  |
| 226759_at   | <b>IKZF4</b>              | 64375             | IKAROS family zinc finger 4 (Eos)                                                                               | 9.18   | 0.40 |  |
| 207433_at   | <b>IL10</b>               | 3586              | interleukin 10                                                                                                  | -76.41 | 0.40 |  |
|             |                           |                   | interleukin 12B (natural killer cell stimulatory factor                                                         |        |      |  |
| 207901_at   | <b>IL12B</b>              | 3593 2,           | cytotoxic lymphocyte maturation factor 2, p40)                                                                  | -61.53 | 0.00 |  |
| 224283_x_at | <b>IL18BP</b>             | 10068             | interleukin 18 binding protein                                                                                  | 3.08   | 0.11 |  |
| 205227_at   | <b>IL1RAP</b>             | 3556              | interleukin 1 receptor accessory protein                                                                        | 2.44   | 0.27 |  |
| 220054_at   | <b>IL23A</b>              | 51561             | interleukin 23, alpha subunit p19                                                                               | -10.70 | 0.00 |  |
| 222062_at   | <b>IL27RA</b>             | 9466              | interleukin 27 receptor, alpha                                                                                  | 6.45   | 0.11 |  |
| 203828_s_at | <b>IL32</b>               | 9235              | interleukin 32                                                                                                  | 6.62   | 0.44 |  |
| 205207_at   | <b>IL6</b>                | 3569              | interleukin 6 (interferon, beta 2)                                                                              | -3.78  | 0.00 |  |
| 200052_s_at | <b>ILF2</b>               | 3608              | interleukin enhancer binding factor 2, 45kDa integrin-linked kinase-associated serine/threonine                 | 3.09   | 0.90 |  |
| 221548_s_at | <b>ILKAP</b>              | 80895             | phosphatase 2C                                                                                                  | 4.06   | 0.40 |  |
| 200955_at   | <b>IMMT</b>               | 10989             | inner membrane protein, mitochondrial (mitofilin)                                                               | 6.09   | 0.90 |  |

|              |                  |                                                                                                                                                   |        |      |
|--------------|------------------|---------------------------------------------------------------------------------------------------------------------------------------------------|--------|------|
| 222654_at    | <b>IMPAD1</b>    | 54928 inositol monophosphatase domain containing 1                                                                                                | 4.29   | 0.27 |
| 231863_at    | <b>ING3</b>      | 54556 inhibitor of growth family, member 3                                                                                                        | 2.46   | 0.63 |
| 210511_s_at  | <b>INHBA</b>     | 3624 inhibin, beta A                                                                                                                              | 3.61   | 0.00 |
| 201626_at    | <b>INSIG1</b>    | 3638 insulin induced gene 1                                                                                                                       | -5.23  | 0.00 |
| 241393_at    | <b>IPP</b>       | 3652 Intracisternal A particle-promoted polypeptide                                                                                               | -2.43  | 0.18 |
| 220034_at    | <b>IRAK3</b>     | 11213 interleukin-1 receptor-associated kinase 3                                                                                                  | -2.24  | 0.00 |
| 204057_at    | <b>IRF8</b>      | 3394 interferon regulatory factor 8                                                                                                               | 4.15   | 0.27 |
| 239044_at    | <b>ITFG1</b>     | 81533 Integrin alpha FG-GAP repeat containing 1<br>integrin, beta 2 (complement component 3                                                       | 5.39   | 0.40 |
| 1555349_a_at | <b>ITGB2</b>     | 3689 receptor 3 and 4 subunit)                                                                                                                    | 2.02   | 0.44 |
| 203710_at    | <b>ITPR1</b>     | 3708 inositol 1,4,5-triphosphate receptor, type 1                                                                                                 | 2.34   | 0.00 |
| 209972_s_at  | <b>JTV1</b>      | 7965 JTV1 gene                                                                                                                                    | 3.22   | 0.23 |
| 200079_s_at  | <b>KARS</b>      | 3735 lysyl-tRNA synthetase<br>kelch repeat and BTB (POZ) domain containing                                                                        | 2.78   | 0.00 |
| 219106_s_at  | <b>KBTBD10</b>   | 10324 10                                                                                                                                          | -2.30  | 0.63 |
| 221307_at    | <b>KCNIP1</b>    | 30820 Kv channel interacting protein 1<br>potassium channel tetramerisation domain                                                                | -2.49  | 0.23 |
| 212188_at    | <b>KCTD12</b>    | 115207 containing 12                                                                                                                              | 2.65   | 0.00 |
| 203712_at    | <b>KIAA0020</b>  | 9933 KIAA0020                                                                                                                                     | 3.52   | 0.63 |
| 203144_s_at  | <b>KIAA0040</b>  | 9674 KIAA0040                                                                                                                                     | 2.67   | 0.63 |
| 212621_at    | <b>KIAA0286</b>  | 23306 KIAA0286 protein                                                                                                                            | 2.17   | 0.18 |
| 212943_at    | <b>KIAA0528</b>  | 9847 KIAA0528                                                                                                                                     | 2.07   | 0.44 |
| 204155_s_at  | <b>KIAA0999</b>  | 23387 KIAA0999 protein                                                                                                                            | -3.20  | 0.18 |
| 212942_s_at  | <b>KIAA1199</b>  | 57214 KIAA1199                                                                                                                                    | -24.89 | 0.00 |
| 227624_at    | <b>KIAA1546</b>  | 54790 KIAA1546                                                                                                                                    | -2.62  | 0.44 |
| 227433_at    | <b>KIAA2018</b>  | 205717 KIAA2018                                                                                                                                   | -2.04  | 0.15 |
| 1557089_at   | <b>KIF5C</b>     | 3800 kinesin family member 5C                                                                                                                     | -3.80  | 0.00 |
| 222913_at    | <b>KLF3</b>      | 51274 Kruppel-like factor 3 (basic)                                                                                                               | 2.37   | 0.44 |
| 221841_s_at  | <b>KLF4</b>      | 9314 Kruppel-like factor 4 (gut)                                                                                                                  | 3.06   | 0.63 |
| 230835_at    | <b>KRTDAP</b>    | 388533 keratinocyte differentiation-associated protein                                                                                            | 2.73   | 0.90 |
| 221982_x_at  | <b>LAGE3</b>     | 8270 L antigen family, member 3                                                                                                                   | 9.43   | 0.23 |
| 217933_s_at  | <b>LAP3</b>      | 51056 leucine aminopeptidase 3                                                                                                                    | 2.42   | 0.00 |
| 212137_at    | <b>LARP1</b>     | 23367 La ribonucleoprotein domain family, member 1                                                                                                | 3.66   | 0.40 |
| 224951_at    | <b>LASS5</b>     | 91012 LAG1 homolog, ceramide synthase 5                                                                                                           | 2.25   | 0.00 |
| 235463_s_at  | <b>LASS6</b>     | 253782 LAG1 homolog, ceramide synthase 6                                                                                                          | 3.72   | 0.63 |
| 212531_at    | <b>LCN2</b>      | 3934 lipocalin 2 (oncogene 24p3)                                                                                                                  | -15.83 | 0.15 |
| 202595_s_at  | <b>LEPROTL1</b>  | 23484 leptin receptor overlapping transcript-like 1                                                                                               | 6.16   | 0.11 |
| 212687_at    | <b>LIMS1</b>     | 3987 LIM and senescent cell antigen-like domains 1                                                                                                | -2.78  | 0.00 |
| 223350_x_at  | <b>LIN7C</b>     | 55327 lin-7 homolog C (C. elegans)                                                                                                                | 2.55   | 0.11 |
| 232593_at    | <b>LINCR</b>     | likely ortholog of mouse lung-inducible Neutralized-<br>93082 related C3HC4 RING domain protein<br>lipase A, lysosomal acid, cholesterol esterase | -8.55  | 0.00 |
| 201847_at    | <b>LIPA</b>      | 3988 (Wolman disease)                                                                                                                             | 27.79  | 0.27 |
| 244289_at    | <b>LOC134466</b> | 134466 hypothetical protein LOC134466                                                                                                             | -6.39  | 0.15 |
| 225934_at    | <b>LOC148413</b> | 148413 Hypothetical protein LOC148413                                                                                                             | 2.76   | 0.11 |
| 227792_at    | <b>LOC162073</b> | 162073 hypothetical protein LOC162073                                                                                                             | 10.06  | 0.18 |
| 235587_at    | <b>LOC202781</b> | 202781 hypothetical protein LOC202781                                                                                                             | -4.23  | 0.40 |
| 227466_at    | <b>LOC285550</b> | 285550 hypothetical protein LOC285550                                                                                                             | 2.20   | 0.63 |
| 244889_at    | <b>LOC388210</b> | 388210 Similar to CG15828-PA, isoform A                                                                                                           | -2.18  | 0.90 |
| 241998_at    | <b>LOC389073</b> | 389073 similar to RIKEN cDNA D630023F18                                                                                                           | 8.44   | 0.44 |
| 200029_at    | <b>LOC392557</b> | 392557 /// ribosomal protein L19 /// similar to ribosomal                                                                                         |        |      |
| 1560058_at   | <b>/// RPL19</b> | 6143 protein L19                                                                                                                                  | 2.01   | 0.00 |
|              | <b>LOC399900</b> | 399900 hypothetical gene supported by AK093779                                                                                                    | -3.72  | 0.63 |

|             |                    |            |                                                                                                                                                                |       |      |
|-------------|--------------------|------------|----------------------------------------------------------------------------------------------------------------------------------------------------------------|-------|------|
|             | <b>LOC401725</b>   |            |                                                                                                                                                                |       |      |
|             | ///                |            |                                                                                                                                                                |       |      |
|             | <b>LOC642828</b>   | 401725 /// | ribosomal protein L6 /// similar to 60S ribosomal protein L6 (TAX-responsive enhancer element-binding protein 107) (TAXREB107) (Neoplasm-related protein C140) |       |      |
| 200034_s_at | /// <b>RPL6</b>    | 642828 /// |                                                                                                                                                                | 2.35  | 0.00 |
|             | <b>LOC402057</b>   | 402057 /// | ribosomal protein S17 /// similar to 40S ribosomal protein S17                                                                                                 |       |      |
| 216348_at   | /// <b>RPS17</b>   | 6218       |                                                                                                                                                                | 2.91  | 0.63 |
|             | <b>LOC442240</b>   | 442240 /// | zinc finger protein 259 /// similar to zinc finger protein 259                                                                                                 |       |      |
| 200054_at   | /// <b>ZNF259</b>  | 8882       |                                                                                                                                                                | 2.92  | 0.00 |
| 215963_x_at | <b>LOC642741</b>   | 642741     | similar to ribosomal protein L3 isoform a                                                                                                                      | 2.40  | 0.23 |
|             | <b>LOC643779</b>   | 6175 ///   | ribosomal protein, large, P0 /// similar to acidic ribosomal phosphoprotein P0                                                                                 |       |      |
| 208856_x_at | /// <b>RPLP0</b>   | 643779     |                                                                                                                                                                | 3.38  | 0.90 |
|             | <b>LOC649821</b>   | 144581 /// | ribosomal protein L14 /// ribosomal protein L14-like /// similar to 60S ribosomal protein L14 (CAG-ISL 7)                                                      |       |      |
| 200074_s_at | /// <b>RPL14</b>   | 649821 /// |                                                                                                                                                                | 2.05  | 0.11 |
|             | <b>RPL14L</b>      | 9045       |                                                                                                                                                                |       |      |
|             | <b>LOC651600</b>   | 25873 ///  | ribosomal protein L36 /// similar to ribosomal protein L36                                                                                                     |       |      |
| 219762_s_at | /// <b>RPL36</b>   | 651600     |                                                                                                                                                                | 2.27  | 0.40 |
|             | <b>LOC652993</b>   | 22822 ///  | pleckstrin homology-like domain, family A, member 1 /// hypothetical LOC652993                                                                                 |       |      |
| 217998_at   | /// <b>PHLDA1</b>  | 652993     |                                                                                                                                                                | -3.70 | 0.40 |
| 217767_at   | <b>LOC653879</b>   | 653879     | similar to Complement C3 precursor                                                                                                                             | -3.04 | 0.00 |
|             | <b>LOC729362</b>   | 6173 ///   | ribosomal protein L36a /// similar to large subunit ribosomal protein L36a                                                                                     |       |      |
| 201406_at   | /// <b>RPL36A</b>  | 729362     |                                                                                                                                                                | 2.54  | 0.00 |
| 240287_at   | <b>LOC730249</b>   | 730249     | similar to Immune-responsive protein 1                                                                                                                         | -3.31 | 0.00 |
|             | <b>LOC730744</b>   | 10296 ///  | macrophage erythroblast attacher /// similar to macrophage erythroblast attacher                                                                               |       |      |
| 207922_s_at | /// <b>MAEA</b>    | 730744     |                                                                                                                                                                | -2.57 | 0.90 |
|             | <b>LOC732160</b>   | 4705 ///   | NADH dehydrogenase (ubiquinone) 1 alpha subcomplex, 10, 42kDa /// similar to NADH dehydrogenase (ubiquinone) 1 alpha subcomplex, 10, 42kDa precursor           |       |      |
| 217860_at   | /// <b>NDUFA10</b> | 732160     |                                                                                                                                                                | 2.40  | 0.23 |
| 201412_at   | <b>LRP10</b>       | 26020      | low density lipoprotein receptor-related protein 10                                                                                                            | -2.71 | 0.00 |
| 201862_s_at | <b>LRRFIP1</b>     | 9208       | leucine rich repeat (in FLII) interacting protein 1 LSM6 homolog, U6 small nuclear RNA associated                                                              | 2.21  | 0.23 |
| 205036_at   | <b>LSM6</b>        | 11157      | (S. cerevisiae)                                                                                                                                                | 3.03  | 0.00 |
| 211581_x_at | <b>LST1</b>        | 7940       | leukocyte specific transcript 1                                                                                                                                | 2.20  | 0.00 |
| 208771_s_at | <b>LTA4H</b>       | 4048       | leukotriene A4 hydrolase                                                                                                                                       | 2.51  | 0.18 |
| 225748_at   | <b>LTV1</b>        | 84946      | LTV1 homolog (S. cerevisiae) v-maf musculoaponeurotic fibrosarcoma                                                                                             | 4.59  | 0.11 |
| 209348_s_at | <b>MAF</b>         | 4094       | oncogene homolog (avian)                                                                                                                                       | 5.51  | 0.00 |
| 235457_at   | <b>MAML2</b>       | 84441      | mastermind-like 2 (Drosophila)                                                                                                                                 | -2.94 | 0.15 |
| 221760_at   | <b>MAN1A1</b>      | 4121       | mannosidase, alpha, class 1A, member 1 Mitogen-activated protein kinase kinase kinase 8                                                                        | 3.02  | 0.63 |
| 235421_at   | <b>MAP3K8</b>      | 1326 ///   | CDNA clone IMAGE:4689481                                                                                                                                       | -3.85 | 0.00 |
| 213045_at   | <b>MAST3</b>       | 23031      | microtubule associated serine/threonine kinase 3                                                                                                               | -2.15 | 0.40 |
| 218163_at   | <b>MCTS1</b>       | 28985      | malignant T cell amplified sequence 1 malic enzyme 2, NAD(+)-dependent,                                                                                        | 2.15  | 0.44 |
| 209397_at   | <b>ME2</b>         | 4200       | mitochondrial                                                                                                                                                  | 2.45  | 0.44 |
| 212830_at   | <b>MEGF9</b>       | 1955       | multiple EGF-like-domains 9                                                                                                                                    | -3.16 | 0.00 |
| 220839_at   | <b>METTL5</b>      | 29081      | methyltransferase like 5                                                                                                                                       | 6.60  | 0.27 |
| 217868_s_at | <b>METTL9</b>      | 51108      | methyltransferase like 9 MFNG O-fucosylpeptide 3-beta-N-                                                                                                       | -2.13 | 0.15 |
| 204153_s_at | <b>MFNG</b>        | 4242       | acetylglucosaminyltransferase                                                                                                                                  | 4.35  | 0.90 |
| 206522_at   | <b>MGAM</b>        | 8972       | maltase-glucoamylase (alpha-glucosidase)                                                                                                                       | -2.24 | 0.23 |
| 239186_at   | <b>MGC39372</b>    | 221756     | hypothetical protein MGC39372                                                                                                                                  | -4.10 | 0.15 |
| 239104_at   | <b>MGC42157</b>    | 439933     | hypothetical locus MGC42157 MID1 interacting protein 1 (gastrulation specific                                                                                  | 4.36  | 0.90 |
| 218251_at   | <b>MID1IP1</b>     | 58526      | G12 homolog (zebrafish))                                                                                                                                       | -3.46 | 0.15 |

|             |                 |                                                                                                                         |        |      |
|-------------|-----------------|-------------------------------------------------------------------------------------------------------------------------|--------|------|
| 223411_at   | <b>MIF4GD</b>   | 57409 MIF4G domain containing                                                                                           | 5.58   | 0.63 |
| 213188_s_at | <b>MINA</b>     | 84864 MYC induced nuclear antigen<br>MKI67 (FHA domain) interacting nucleolar                                           | 2.99   | 0.44 |
| 224714_at   | <b>MKI67IP</b>  | 84365 phosphoprotein<br>myeloid/lymphoid or mixed-lineage leukemia<br>(trithorax homolog, Drosophila); translocated to, | 4.25   | 0.23 |
| 230122_at   | <b>MLLT10</b>   | 8028 10                                                                                                                 | 4.78   | 0.18 |
| 224866_at   | <b>MLSTD2</b>   | 84188 male sterility domain containing 2<br>methylmalonic aciduria (cobalamin deficiency)                               | 2.05   | 0.63 |
| 239852_at   | <b>MMAA</b>     | 166785 cblA type                                                                                                        | -2.22  | 0.63 |
| 202828_s_at | <b>MMP14</b>    | 4323 matrix metalloproteinase 14 (membrane-inserted)                                                                    | -10.07 | 0.00 |
| 203740_at   | <b>MPHOSPH6</b> | 10200 M-phase phosphoprotein 6                                                                                          | 3.41   | 0.40 |
| 227747_at   | <b>MPZL3</b>    | 196264 myelin protein zero-like 3                                                                                       | -3.58  | 0.90 |
| 204438_at   | <b>MRC1 ///</b> | 414308 /// mannose receptor, C type 1 /// mannose receptor,                                                             |        |      |
| 225260_s_at | <b>MRC1L1</b>   | 4360 C type 1-like 1                                                                                                    | 43.08  | 0.23 |
| 218558_s_at | <b>MRPL32</b>   | 64983 mitochondrial ribosomal protein L32                                                                               | 3.87   | 0.63 |
| 221997_s_at | <b>MRPL39</b>   | 54148 mitochondrial ribosomal protein L39                                                                               | 3.97   | 0.27 |
| 223156_at   | <b>MRPL52</b>   | 122704 Mitochondrial ribosomal protein L52                                                                              | -4.15  | 0.00 |
|             | <b>MRPS23</b>   | 51649 mitochondrial ribosomal protein S23                                                                               | 4.82   | 0.27 |
|             | <b>MT1A ///</b> | 4489 ///                                                                                                                |        |      |
|             | <b>MT1M ///</b> | 4499 /// metallothionein 1A /// metallothionein 1M ///                                                                  |        |      |
| 216336_x_at | <b>MT1P2</b>    | 645745 metallothionein 1 pseudogene 2                                                                                   | -3.47  | 0.15 |
| 213629_x_at | <b>MT1F</b>     | 4494 metallothionein 1F                                                                                                 | -13.78 | 0.27 |
| 204745_x_at | <b>MT1G</b>     | 4495 metallothionein 1G                                                                                                 | -8.47  | 0.44 |
|             | <b>MT1H ///</b> | 4496 /// metallothionein 1H /// metallothionein 1                                                                       |        |      |
| 206461_x_at | <b>MT1P2</b>    | 645745 pseudogene 2                                                                                                     | -9.65  | 0.15 |
| 211456_x_at | <b>MT1P2</b>    | 645745 metallothionein 1 pseudogene 2                                                                                   | -5.10  | 0.15 |
| 204326_x_at | <b>MT1X</b>     | 4501 metallothionein 1X                                                                                                 | -4.63  | 0.15 |
| 212185_x_at | <b>MT2A</b>     | 4502 metallothionein 2A                                                                                                 | -2.01  | 0.63 |
| 217772_s_at | <b>MTCH2</b>    | 23788 mitochondrial carrier homolog 2 (C. elegans)                                                                      | 2.10   | 0.44 |
| 212250_at   | <b>MTDH</b>     | 92140 metadherin<br>methylenetetrahydrofolate dehydrogenase<br>(NADP+ dependent) 2, methenyltetrahydrofolate            | 2.49   | 0.00 |
| 201761_at   | <b>MTHFD2</b>   | 10797 cyclohydrolase                                                                                                    | 2.13   | 0.23 |
| 225673_at   | <b>MYADM</b>    | 91663 myeloid-associated differentiation marker                                                                         | 3.04   | 0.11 |
| 206304_at   | <b>MYBPH</b>    | 4608 myosin binding protein H                                                                                           | -2.67  | 0.18 |
| 238644_at   | <b>MYSM1</b>    | 114803 myb-like, SWIRM and MPN domains 1                                                                                | -2.06  | 0.63 |
| 218840_s_at | <b>NADSYN1</b>  | 55191 NAD synthetase 1                                                                                                  | 4.29   | 0.00 |
| 200027_at   | <b>NARS</b>     | 4677 asparaginyl-tRNA synthetase<br>nuclear autoantigenic sperm protein (histone-                                       | 5.12   | 0.00 |
| 201970_s_at | <b>NASP</b>     | 4678 binding)                                                                                                           | 3.44   | 0.11 |
| 207677_s_at | <b>NCF4</b>     | 4689 neutrophil cytosolic factor 4, 40kDa<br>NADH dehydrogenase (ubiquinone) 1 alpha                                    | -2.48  | 0.00 |
| 220864_s_at | <b>NDUFA13</b>  | 51079 subcomplex, 13<br>NADH dehydrogenase (ubiquinone) 1 alpha                                                         | 3.47   | 0.90 |
| 217773_s_at | <b>NDUFA4</b>   | 4697 subcomplex, 4, 9kDa<br>NADH dehydrogenase (ubiquinone) 1, alpha/beta                                               | 3.64   | 0.40 |
| 202077_at   | <b>NDUFAB1</b>  | 4706 subcomplex, 1, 8kDa<br>NADH dehydrogenase (ubiquinone) 1 beta                                                      | 6.11   | 0.11 |
| 201227_s_at | <b>NDUFB8</b>   | 4714 subcomplex, 8, 19kDa<br>NADH dehydrogenase (ubiquinone) 1 beta                                                     | 3.37   | 0.11 |
| 222992_s_at | <b>NDUFB9</b>   | 4715 subcomplex, 9, 22kDa                                                                                               | 3.34   | 0.27 |
| 201740_at   | <b>NDUFS3</b>   | NADH dehydrogenase (ubiquinone) Fe-S protein<br>4722 3, 30kDa (NADH-coenzyme Q reductase)                               | 3.07   | 0.44 |
| 201757_at   | <b>NDUFS5</b>   | NADH dehydrogenase (ubiquinone) Fe-S protein<br>4725 5, 15kDa (NADH-coenzyme Q reductase)                               | 4.24   | 0.23 |

|             |                  |                                                                                                                 |        |      |
|-------------|------------------|-----------------------------------------------------------------------------------------------------------------|--------|------|
| 203606_at   | <b>NDUFS6</b>    | NADH dehydrogenase (ubiquinone) Fe-S protein<br>4726 6, 13kDa (NADH-coenzyme Q reductase)                       | 2.03   | 0.63 |
| 237761_at   | <b>NEK6</b>      | 10783 NIMA (never in mitosis gene a)-related kinase 6                                                           | 4.24   | 0.23 |
| 218888_s_at | <b>NETO2</b>     | 81831 neuropilin (NRP) and tolloid (TLL)-like 2                                                                 | 2.92   | 0.63 |
| 212809_at   | <b>NFATC2IP</b>  | 84901 calcineurin-dependent 2 interacting protein<br>nuclear factor of activated T-cells, cytoplasmic,          | 2.41   | 0.00 |
| 211524_at   | <b>NFKB2</b>     | 4791 enhancer in B-cells 2 (p49/p100)<br>NHP2 non-histone chromosome protein 2-like 1                           | -2.31  | 0.18 |
| 201076_at   | <b>NHP2L1</b>    | 4809 ( <i>S. cerevisiae</i> )                                                                                   | 2.71   | 0.18 |
| 219594_at   | <b>NINJ2</b>     | 4815 ninjurin 2<br>non-metastatic cells 1, protein (NM23A)                                                      | -3.72  | 0.90 |
| 201577_at   | <b>NME1</b>      | 4830 expressed in<br>non-metastatic cells 7, protein expressed in                                               | 28.92  | 0.11 |
| 227556_at   | <b>NME7</b>      | 29922 (nucleoside-diphosphate kinase)                                                                           | 7.97   | 0.40 |
| 200875_s_at | <b>NOL5A</b>     | 10528 nucleolar protein 5A (56kDa with KKE/D repeat)<br>nucleolar protein family A, member 2 (H/ACA             | 2.91   | 0.63 |
| 209104_s_at | <b>NOLA2</b>     | 55651 small nucleolar RNPs)                                                                                     | 5.08   | 0.90 |
| 223096_at   | <b>NOP5/NOP5</b> | 8                                                                                                               |        |      |
| 218625_at   | <b>NRN1</b>      | 51602 nucleolar protein NOP5/NOP58                                                                              | 2.16   | 0.63 |
| 220248_x_at | <b>NSFL1C</b>    | 51299 neuritin 1                                                                                                | 8.38   | 0.27 |
| 223076_s_at | <b>NSUN2</b>     | 55968 NSFL1 (p97) cofactor (p47)                                                                                | 2.35   | 0.63 |
| 219347_at   | <b>NUDT15</b>    | 54888 NOL1/NOP2/Sun domain family, member 2<br>nudix (nucleoside diphosphate linked moiety X)-<br>type motif 15 | 2.15   | 0.11 |
| 221579_s_at | <b>NUDT3</b>     | 55270 nudix (nucleoside diphosphate linked moiety X)-<br>type motif 3                                           | 4.47   | 0.63 |
| 218375_at   | <b>NUDT9</b>     | 11165 nudix (nucleoside diphosphate linked moiety X)-<br>type motif 9                                           | 2.13   | 0.00 |
| 202188_at   | <b>NUP93</b>     | 53343 type motif 9<br>9688 nucleoporin 93kDa                                                                    | 2.30   | 0.18 |
| 202397_at   | <b>NUTF2</b>     | 10204 nuclear transport factor 2                                                                                | 2.92   | 0.00 |
| 218708_at   | <b>NXT1</b>      | 10204 nuclear transport factor 2                                                                                | 2.57   | 0.00 |
| 205660_at   | <b>OASL</b>      | 29107 NTF2-like export factor 1                                                                                 | 3.25   | 0.18 |
| 200790_at   | <b>ODC1</b>      | 8638 2'-5'-oligoadenylate synthetase-like                                                                       | -2.15  | 0.15 |
| 219293_s_at | <b>OLA1</b>      | 4953 ornithine decarboxylase 1                                                                                  | 3.27   | 0.11 |
| 228170_at   | <b>OLIG1</b>     | 29789 Obg-like ATPase 1                                                                                         | 5.12   | 0.40 |
| 205040_at   | <b>ORM1</b>      | 116448 oligodendrocyte transcription factor 1                                                                   | -5.73  | 0.63 |
| 205041_s_at | <b>ORM1 ///</b>  | 5004 orosomuroid 1                                                                                              | -3.68  | 0.27 |
| 203480_s_at | <b>ORM2</b>      | 5005 orosomuroid 1 /// orosomuroid 2                                                                            | -3.64  | 0.00 |
| 224745_x_at | <b>OTUD4</b>     | 54726 OTU domain containing 4                                                                                   | 4.82   | 0.27 |
| 220005_at   | <b>OTUD5</b>     | 55593 OTU domain containing 5                                                                                   | -7.75  | 0.00 |
| 206637_at   | <b>P2RY13</b>    | 53829 purinergic receptor P2Y, G-protein coupled, 13                                                            | 5.46   | 0.00 |
| 220001_at   | <b>P2RY14</b>    | 9934 purinergic receptor P2Y, G-protein coupled, 14                                                             | 2.73   | 0.00 |
| 209063_x_at | <b>PADI4</b>     | 23569 peptidyl arginine deiminase, type IV                                                                      | -3.86  | 0.63 |
| 226507_at   | <b>PAIP1</b>     | 10605 poly(A) binding protein interacting protein 1<br>p21/Cdc42/Rac1-activated kinase 1 (STE20                 | 2.60   | 0.44 |
| 208878_s_at | <b>PAK1</b>      | 5058 homolog, yeast)                                                                                            | 2.45   | 0.90 |
| 200006_at   | <b>PAK2</b>      | 5062 p21 (CDKN1A)-activated kinase 2<br>Parkinson disease (autosomal recessive, early                           | 2.14   | 0.18 |
| 209431_s_at | <b>PARK7</b>     | 11315 onset) 7                                                                                                  | 2.41   | 0.40 |
| 227759_at   | <b>PATZ1</b>     | 23598 POZ (BTB) and AT hook containing zinc finger 1                                                            | 2.45   | 0.44 |
| 221898_at   | <b>PCSK9</b>     | 255738 proprotein convertase subtilisin/kexin type 9                                                            | 2.17   | 0.00 |
| 223037_at   | <b>PDPN</b>      | 10630 podoplanin                                                                                                | -10.60 | 0.44 |
| 1553140_at  | <b>PDZD11</b>    | 51248 PDZ domain containing 11                                                                                  | 2.15   | 0.44 |
|             | <b>PELO</b>      | 53918 pelota homolog ( <i>Drosophila</i> )                                                                      | 2.38   | 0.44 |



|             |                 |                                                                                                          |        |      |
|-------------|-----------------|----------------------------------------------------------------------------------------------------------|--------|------|
| 219180_s_at | <b>PEX26</b>    | 55670 peroxisome biogenesis factor 26                                                                    | 4.31   | 0.90 |
| 202464_s_at | <b>PFKFB3</b>   | 5209 biphosphatase 3                                                                                     | -2.70  | 0.00 |
| 232045_at   | <b>PHACTR1</b>  | 221692 phosphatase and actin regulator 1                                                                 | -2.20  | 0.63 |
| 200658_s_at | <b>PHB</b>      | 5245 prohibitin                                                                                          | 3.22   | 0.63 |
| 232101_s_at | <b>PIGN</b>     | 23556 phosphatidylinositol glycan anchor biosynthesis, class N                                           | 2.40   | 0.63 |
| 224660_at   | <b>PIGY</b>     | 84992 class Y phosphoinositide-3-kinase, catalytic, gamma                                                | 3.08   | 0.23 |
| 206369_s_at | <b>PIK3CG</b>   | 5294 polypeptide                                                                                         | -2.83  | 0.63 |
| 219014_at   | <b>PLAC8</b>    | 51316 placenta-specific 8                                                                                | -23.62 | 0.00 |
| 202925_s_at | <b>PLAGL2</b>   | 5326 pleiomorphic adenoma gene-like 2                                                                    | -3.95  | 0.18 |
| 226636_at   | <b>PLD1</b>     | 5337 phospholipase D1, phosphatidylcholine-specific                                                      | -4.34  | 0.63 |
| 201429_s_at | <b>PLK1 ///</b> | 5347 /// polo-like kinase 1 (Drosophila) /// ribosomal                                                   |        |      |
| 227276_at   | <b>RPL37A</b>   | 6168 protein L37a                                                                                        | 2.02   | 0.23 |
| 38671_at    | <b>PLXDC2</b>   | 84898 plexin domain containing 2                                                                         | 6.59   | 0.63 |
| 225844_at   | <b>PLXND1</b>   | 23129 plexin D1 polymerase (DNA-directed), epsilon 4 (p12 subunit)                                       | -3.55  | 0.27 |
| 202306_at   | <b>POLE4</b>    | 56655 subunit)                                                                                           | 5.59   | 0.23 |
| 209302_at   | <b>POLR2G</b>   | 5436 polymerase (RNA) II (DNA directed) polypeptide G                                                    | 3.39   | 0.27 |
| 212226_s_at | <b>POLR2H</b>   | 5437 polymerase (RNA) II (DNA directed) polypeptide H                                                    | 4.88   | 0.11 |
| 214146_s_at | <b>PPAP2B</b>   | 8613 phosphatidic acid phosphatase type 2B pro-platelet basic protein (chemokine (C-X-C motif) ligand 7) | -4.08  | 0.00 |
| 214374_s_at | <b>PPBP</b>     | 5473 PTPRF interacting protein, binding protein 1 (liprin beta 1)                                        | 4.59   | 0.11 |
| 211378_x_at | <b>PPFIBP1</b>  | 8496 beta 1)                                                                                             | 2.86   | 0.11 |
| 222500_at   | <b>PPIA</b>     | 5478 peptidylprolyl isomerase A (cyclophilin A)                                                          | 2.24   | 0.00 |
| 200975_at   | <b>PPIL1</b>    | 51645 peptidylprolyl isomerase (cyclophilin)-like 1                                                      | 6.48   | 0.40 |
| 201494_at   | <b>PPT1</b>     | 5538 palmitoyl-protein thioesterase 1 (ceroid-lipofuscinosis, neuronal 1, infantile)                     | 3.01   | 0.11 |
| 208680_at   | <b>PRCP</b>     | 5547 prolylcarboxypeptidase (angiotensinase C)                                                           | 2.44   | 0.00 |
| 201619_at   | <b>PRDX1</b>    | 5052 peroxiredoxin 1                                                                                     | 4.49   | 0.00 |
|             | <b>PRDX3</b>    | 10935 peroxiredoxin 3                                                                                    | 3.49   | 0.11 |
| 211743_s_at | <b>PRG2</b>     | 5553 proteoglycan 2, bone marrow (natural killer cell activator, eosinophil granule major basic protein) | -2.17  | 0.18 |
| 203650_at   | <b>PRKCH</b>    | 5583 protein kinase C, eta                                                                               | -2.87  | 0.00 |
| 232629_at   | <b>PROCR</b>    | 10544 protein C receptor, endothelial (EPCR)                                                             | 3.36   | 0.44 |
| 208880_s_at | <b>PROK2</b>    | 60675 prokineticin 2                                                                                     | -3.59  | 0.00 |
| 221734_at   | <b>PRPF6</b>    | 24148 PRP6 pre-mRNA processing factor 6 homolog (S. cerevisiae)                                          | 2.23   | 0.40 |
| 238513_at   | <b>PRRC1</b>    | 133619 proline-rich coiled-coil 1                                                                        | 2.55   | 0.63 |
| 201400_at   | <b>PRRG4</b>    | 79056 Proline rich Gla (G-carboxyglutamic acid) 4 (transmembrane)                                        | 2.85   | 0.18 |
| 208827_at   | <b>PSMB3</b>    | 5691 proteasome (prosome, macropain) subunit, beta type, 3                                               | 2.08   | 0.40 |
| 201068_s_at | <b>PSMB6</b>    | 5694 proteasome (prosome, macropain) subunit, beta type, 6                                               | 3.83   | 0.27 |
| 209503_s_at | <b>PSMC2</b>    | 5701 proteasome (prosome, macropain) 26S subunit, ATPase, 2                                              | 2.57   | 0.00 |
| 203447_at   | <b>PSMC5</b>    | 5705 proteasome (prosome, macropain) 26S subunit, ATPase, 5                                              | 3.72   | 0.18 |
| 200820_at   | <b>PSMD5</b>    | 5711 proteasome (prosome, macropain) 26S subunit, non-ATPase, 5                                          | -4.29  | 0.00 |
|             | <b>PSMD8</b>    | 5714 proteasome (prosome, macropain) 26S subunit, non-ATPase, 8                                          | 2.45   | 0.40 |

|              |                        |                                                                                                                                                 |       |      |
|--------------|------------------------|-------------------------------------------------------------------------------------------------------------------------------------------------|-------|------|
| 211270_x_at  | <b>PTBP1</b>           | 5725 polypyrimidine tract binding protein 1                                                                                                     | 2.17  | 0.23 |
| 201433_s_at  | <b>PTDSS1</b>          | 9791 phosphatidylserine synthase 1                                                                                                              | 5.94  | 0.27 |
| 210367_s_at  | <b>PTGES</b>           | 9536 prostaglandin E synthase                                                                                                                   | -7.45 | 0.00 |
| 204748_at    | <b>PTGS2</b>           | 5743 prostaglandin-endoperoxide synthase 2<br>(prostaglandin G/H synthase and cyclooxygenase)<br>protein tyrosine phosphatase, receptor type, N | -2.09 | 0.00 |
| 203030_s_at  | <b>PTPRN2</b>          | 5799 polypeptide 2<br>pentraxin-related gene, rapidly induced by IL-1                                                                           | -5.41 | 0.18 |
| 206157_at    | <b>PTX3</b>            | 5806 beta<br>phosphorylase, glycogen; liver (Hers disease,<br>glycogen storage disease type VI)                                                 | -5.38 | 0.44 |
| 202990_at    | <b>PYGL</b>            | 5836 glycogen storage disease type VI)                                                                                                          | 2.62  | 0.27 |
| 1554800_at   | <b>RAB39</b>           | 54734 RAB39, member RAS oncogene family                                                                                                         | 3.34  | 0.44 |
| 201039_s_at  | <b>RAD23A</b>          | 5886 RAD23 homolog A (S. cerevisiae)<br>recombination activating gene 1 activating protein                                                      | 2.55  | 0.11 |
| 219125_s_at  | <b>RAG1AP1</b>         | 55974 1                                                                                                                                         | 2.98  | 0.63 |
| 202844_s_at  | <b>RALBP1</b>          | 10928 ralA binding protein 1                                                                                                                    | 2.70  | 0.11 |
| 200750_s_at  | <b>RAN</b>             | 5901 RAN, member RAS oncogene family<br>retinoic acid receptor responder (tazarotene<br>induced) 3                                              | 2.43  | 0.40 |
| 204070_at    | <b>RARRES3</b>         | 5920 induced) 3                                                                                                                                 | 3.94  | 0.00 |
| 226436_at    | <b>RASSF4</b>          | 83937 Ras association (RalGDS/AF-6) domain family 4                                                                                             | -2.82 | 0.63 |
| 208319_s_at  | <b>RBM3</b>            | 5935 RNA binding motif (RNP1, RRM) protein 3<br>recombination signal binding protein for                                                        | 2.92  | 0.11 |
| 211974_x_at  | <b>RBPJ</b>            | 3516 immunoglobulin kappa J region<br>regulator of chromosome condensation (RCC1)                                                               | 2.02  | 0.11 |
| 204759_at    | <b>RCBTB2</b>          | 1102 and BTB (POZ) domain containing protein 2                                                                                                  | 4.33  | 0.27 |
| 220570_at    | <b>RETN</b>            | 56729 resistin                                                                                                                                  | -4.78 | 0.15 |
| 203224_at    | <b>RFK</b>             | 55312 riboflavin kinase<br>regulatory factor X, 5 (influences HLA class II<br>expression)                                                       | 4.04  | 0.00 |
| 202963_at    | <b>RFX5</b>            | 5993 expression)                                                                                                                                | 2.97  | 0.44 |
| 202388_at    | <b>RGS2</b>            | 5997 regulator of G-protein signaling 2, 24kDa                                                                                                  | -2.33 | 0.23 |
| 1553713_a_at | <b>RHEBL1</b>          | 121268 Ras homolog enriched in brain like 1                                                                                                     | 6.73  | 0.00 |
| 223169_s_at  | <b>RHOU</b>            | 58480 ras homolog gene family, member U                                                                                                         | -2.92 | 0.44 |
| 227366_at    | <b>RILP</b>            | 83547 Rab interacting lysosomal protein                                                                                                         | 2.20  | 0.63 |
| 218528_s_at  | <b>RNF38</b>           | 152006 ring finger protein 38                                                                                                                   | 2.35  | 0.63 |
| 204208_at    | <b>RNGTT<br/>RP11-</b> | 8732 RNA guanylyltransferase and 5'-phosphatase                                                                                                 | -5.41 | 0.15 |
| 212946_at    | <b>125A7.3</b>         | 23078 KIAA0564 protein                                                                                                                          | 7.18  | 0.40 |
| 221770_at    | <b>RPE</b>             | 6120 ribulose-5-phosphate-3-epimerase<br>ribose 5-phosphate isomerase A (ribose 5-<br>phosphate epimerase)                                      | 5.03  | 0.63 |
| 212973_at    | <b>RPIA</b>            | 22934 phosphate epimerase)                                                                                                                      | 4.17  | 0.90 |
| 229563_s_at  | <b>RPL10A</b>          | 4736 ribosomal protein L10a                                                                                                                     | 2.51  | 0.00 |
| 212933_x_at  | <b>RPL13</b>           | 6137 ribosomal protein L13                                                                                                                      | 2.33  | 0.11 |
| 219138_at    | <b>RPL14</b>           | 9045 ribosomal protein L14                                                                                                                      | 2.06  | 0.18 |
| 200022_at    | <b>RPL18</b>           | 6141 ribosomal protein L18                                                                                                                      | 2.03  | 0.27 |
| 208768_x_at  | <b>RPL22</b>           | 6146 ribosomal protein L22                                                                                                                      | 2.95  | 0.11 |
| 212039_x_at  | <b>RPL3</b>            | 6122 ribosomal protein L3                                                                                                                       | 2.48  | 0.11 |
| 213080_x_at  | <b>RPL5</b>            | 6125 ribosomal protein L5                                                                                                                       | 2.70  | 0.00 |
| 200936_at    | <b>RPL8</b>            | 6132 ribosomal protein L8                                                                                                                       | 2.25  | 0.00 |
| 200763_s_at  | <b>RPLP1</b>           | 6176 ribosomal protein, large, P1                                                                                                               | 2.83  | 0.18 |
| 200908_s_at  | <b>RPLP2</b>           | 6181 ribosomal protein, large, P2                                                                                                               | 2.17  | 0.00 |
| 201258_at    | <b>RPS16</b>           | 6217 ribosomal protein S16                                                                                                                      | 2.07  | 0.18 |
| 212578_x_at  | <b>RPS17</b>           | 6218 ribosomal protein S17                                                                                                                      | 2.02  | 0.11 |
| 200926_at    | <b>RPS23</b>           | 6228 ribosomal protein S23                                                                                                                      | 2.04  | 0.18 |
| 201094_at    | <b>RPS29</b>           | 6235 ribosomal protein S29                                                                                                                      | 2.12  | 0.63 |
| 200858_s_at  | <b>RPS8</b>            | 6202 ribosomal protein S8                                                                                                                       | 3.15  | 0.18 |
| 228487_s_at  | <b>RREB1</b>           | 6239 Ras responsive element binding protein 1                                                                                                   | 2.68  | 0.23 |

|              |                  |                                                                                                                               |        |      |
|--------------|------------------|-------------------------------------------------------------------------------------------------------------------------------|--------|------|
| 219037_at    | <b>RRP15</b>     | 51018 ribosomal RNA processing 15 homolog (S. cerevisiae)                                                                     | 3.04   | 0.18 |
| 212018_s_at  | <b>RSL1D1</b>    | 26156 ribosomal L1 domain containing 1                                                                                        | 3.71   | 0.11 |
| 211620_x_at  | <b>RUNX1</b>     | 861 runt-related transcription factor 1 (acute myeloid leukemia 1; aml1 oncogene)                                             | 2.83   | 0.11 |
| 212440_at    | <b>RY1</b>       | 11017 putative nucleic acid binding protein RY-1                                                                              | 2.32   | 0.00 |
| 205863_at    | <b>S100A12</b>   | 6283 S100 calcium binding protein A12                                                                                         | -3.60  | 0.00 |
| 217728_at    | <b>S100A6</b>    | 6277 S100 calcium binding protein A6                                                                                          | 3.55   | 0.11 |
| 209486_at    | <b>SAS10</b>     | 57050 disrupter of silencing 10                                                                                               | 3.66   | 0.40 |
| 218793_s_at  | <b>SCML1</b>     | 6322 sex comb on midleg-like 1 (Drosophila)                                                                                   | 3.96   | 0.63 |
| 218217_at    | <b>SCPEP1</b>    | 59342 serine carboxypeptidase 1                                                                                               | 3.91   | 0.18 |
| 202542_s_at  | <b>SCYE1</b>     | 9255 small inducible cytokine subfamily E, member 1 (endothelial monocyte-activating)                                         | 3.15   | 0.27 |
| 41329_at     | <b>SCYL3</b>     | 57147 SCY1-like 3 (S. cerevisiae)                                                                                             | 3.01   | 0.90 |
| 202071_at    | <b>SDC4</b>      | 6385 syndecan 4                                                                                                               | 2.42   | 0.44 |
| 227785_at    | <b>SDCCAG8</b>   | 10806 serologically defined colon cancer antigen 8                                                                            | 3.20   | 0.18 |
| 218681_s_at  | <b>SDF2L1</b>    | 23753 stromal cell-derived factor 2-like 1                                                                                    | 2.69   | 0.40 |
| 213716_s_at  | <b>SECTM1</b>    | 6398 secreted and transmembrane 1                                                                                             | 2.84   | 0.00 |
| 223225_s_at  | <b>SEH1L</b>     | 81929 SEH1-like (S. cerevisiae)                                                                                               | 4.82   | 0.40 |
| 223449_at    | <b>SEMA6A</b>    | 57556 sema domain, transmembrane domain (TM), and cytoplasmic domain, (semaphorin) 6A                                         | -16.61 | 0.40 |
| 210466_s_at  | <b>SERPBP1</b>   | 26135 SERPINE1 mRNA binding protein 1                                                                                         | 2.92   | 0.00 |
| 242814_at    | <b>SERPINB9</b>  | 5272 serpin peptidase inhibitor, clade B (ovalbumin), member 9                                                                | -3.30  | 0.44 |
| 227210_at    | <b>SFMBT2</b>    | 57713 Scm-like with four mbt domains 2                                                                                        | -2.29  | 0.15 |
| 214141_x_at  | <b>SFRS7</b>     | 6432 splicing factor, arginine/serine-rich 7, 35kDa                                                                           | 2.52   | 0.11 |
| 238567_at    | <b>SGPP2</b>     | 130367 sphingosine-1-phosphate phosphatase 2                                                                                  | -3.42  | 0.40 |
| 232084_at    | <b>SGTB</b>      | 54557 small glutamine-rich tetratricopeptide repeat (TPR)-containing, beta SH3 domain binding glutamic acid-rich protein like | -2.26  | 0.23 |
| 221269_s_at  | <b>SH3BGR13</b>  | 83442 3                                                                                                                       | 2.57   | 0.27 |
| 210135_s_at  | <b>SHOX2</b>     | 6474 short stature homeobox 2                                                                                                 | 7.28   | 0.27 |
| 56256_at     | <b>SIDT2</b>     | 51092 SID1 transmembrane family, member 2                                                                                     | 7.48   | 0.18 |
| 210569_s_at  | <b>SIGLEC9</b>   | 27180 sialic acid binding Ig-like lectin 9                                                                                    | -3.46  | 0.18 |
| 1561880_a_at | <b>SIGLECP16</b> | 400709 sialic acid binding Ig-like lectin, pseudogene 16                                                                      | 4.03   | 0.63 |
| 219386_s_at  | <b>SLAMF8</b>    | 56833 SLAM family member 8                                                                                                    | 10.40  | 0.00 |
| 206052_s_at  | <b>SLBP</b>      | 7884 stem-loop (histone) binding protein                                                                                      | 3.01   | 0.63 |
| 203123_s_at  | <b>SLC11A2</b>   | 4891 solute carrier family 11 (proton-coupled divalent metal ion transporters), member 2                                      | -2.63  | 0.00 |
| 209900_s_at  | <b>SLC16A1</b>   | 6566 solute carrier family 16, member 1 (monocarboxylic acid transporter 1)                                                   | 2.27   | 0.40 |
| 208916_at    | <b>SLC1A5</b>    | 6510 solute carrier family 1 (neutral amino acid transporter), member 5                                                       | 2.21   | 0.90 |
| 216721_at    | <b>SLC25A30</b>  | 253512 Solute carrier family 25, member 30                                                                                    | 4.13   | 0.40 |
| 226928_x_at  | <b>SLC25A37</b>  | 51312 Solute carrier family 25, member 37                                                                                     | -2.01  | 0.00 |
| 200657_at    | <b>SLC25A5</b>   | 292 solute carrier family 25 (mitochondrial carrier; adenine nucleotide translocator), member 5                               | 3.84   | 0.18 |
| 212826_s_at  | <b>SLC25A6</b>   | 293 solute carrier family 25 (mitochondrial carrier; adenine nucleotide translocator), member 6                               | 2.71   | 0.23 |
| 207362_at    | <b>SLC30A4</b>   | 7782 solute carrier family 30 (zinc transporter), member 4                                                                    | -5.07  | 0.15 |
| 225881_at    | <b>SLC35B4</b>   | 84912 solute carrier family 35, member B4                                                                                     | 6.39   | 0.11 |
| 225037_at    | <b>SLC35C2</b>   | 51006 solute carrier family 35, member C2                                                                                     | 2.33   | 0.63 |
| 202089_s_at  | <b>SLC39A6</b>   | 25800 solute carrier family 39 (zinc transporter), member 6                                                                   | 2.89   | 0.00 |
| 209267_s_at  | <b>SLC39A8</b>   | 64116 solute carrier family 39 (zinc transporter), member 8                                                                   | -3.54  | 0.00 |
| 226629_at    | <b>SLC43A2</b>   | 124935 solute carrier family 43, member 2                                                                                     | -2.16  | 0.40 |

|              |                  |                                                                                                                             |        |      |
|--------------|------------------|-----------------------------------------------------------------------------------------------------------------------------|--------|------|
| 210692_s_at  | <b>SLC43A3</b>   | 29015 solute carrier family 43, member 3                                                                                    | -2.01  | 0.15 |
| 204588_s_at  | <b>SLC7A7</b>    | 9056 solute carrier family 7 (cationic amino acid transporter, y+ system), member 7                                         | -4.13  | 0.00 |
| 219911_s_at  | <b>SLCO4A1</b>   | 28231 member 4A1                                                                                                            | -10.91 | 0.00 |
| 226743_at    | <b>SLFN11</b>    | 91607 schlafen family member 11                                                                                             | 2.88   | 0.18 |
| 1553055_a_at | <b>SLFN5</b>     | 162394 schlafen family member 5<br>SWI/SNF related, matrix associated, actin dependent regulator of chromatin, subfamily a, | -4.52  | 0.00 |
| 208794_s_at  | <b>SMARCA4</b>   | 6597 member 4                                                                                                               | 3.41   | 0.00 |
| 209258_s_at  | <b>SMC3</b>      | 9126 structural maintenance of chromosomes 3<br>sphingomyelin phosphodiesterase 1, acid                                     | 2.47   | 0.44 |
| 209420_s_at  | <b>SMPD1</b>     | 6609 lysosomal (acid sphingomyelinase)                                                                                      | 3.19   | 0.00 |
| 213624_at    | <b>SMPDL3A</b>   | 10924 sphingomyelin phosphodiesterase, acid-like 3A                                                                         | -8.64  | 0.90 |
| 202043_s_at  | <b>SMS</b>       | 6611 spermine synthase                                                                                                      | -2.12  | 0.00 |
| 220358_at    | <b>SNFT</b>      | 55509 Jun dimerization protein p21SNFT                                                                                      | 4.13   | 0.00 |
| 201342_at    | <b>SNRPC</b>     | 6631 small nuclear ribonucleoprotein polypeptide C<br>small nuclear ribonucleoprotein D1 polypeptide                        | 4.84   | 0.63 |
| 202690_s_at  | <b>SNRPD1</b>    | 6632 16kDa                                                                                                                  | 2.03   | 0.00 |
| 203316_s_at  | <b>SNRPE</b>     | 6635 small nuclear ribonucleoprotein polypeptide E                                                                          | 2.18   | 0.00 |
| 203832_at    | <b>SNRPF</b>     | 6636 small nuclear ribonucleoprotein polypeptide F                                                                          | 4.48   | 0.63 |
| 200991_s_at  | <b>SNX17</b>     | 9784 sorting nexin 17                                                                                                       | 2.95   | 0.44 |
| 213545_x_at  | <b>SNX3</b>      | 8724 sorting nexin 3                                                                                                        | 2.94   | 0.11 |
| 205329_s_at  | <b>SNX4</b>      | 8723 sorting nexin 4                                                                                                        | 3.33   | 0.63 |
| 229980_s_at  | <b>SNX5</b>      | 27131 sorting nexin 5                                                                                                       | 4.08   | 0.63 |
| 213337_s_at  | <b>SOCS1</b>     | 8651 suppressor of cytokine signaling 1                                                                                     | 2.37   | 0.11 |
| 212807_s_at  | <b>SORT1</b>     | 6272 sortilin 1                                                                                                             | 2.85   | 0.44 |
| 208921_s_at  | <b>SRI</b>       | 6717 sorcin                                                                                                                 | 2.33   | 0.18 |
| 222532_at    | <b>SRPRB</b>     | 58477 signal recognition particle receptor, B subunit                                                                       | 4.68   | 0.00 |
| 201138_s_at  | <b>SSB</b>       | 6741 Sjogren syndrome antigen B (autoantigen La)                                                                            | 3.77   | 0.00 |
| 202591_s_at  | <b>SSBP1</b>     | 6742 single-stranded DNA binding protein 1<br>suppression of tumorigenicity 13 (colon                                       | 2.12   | 0.40 |
| 207040_s_at  | <b>ST13</b>      | 6767 carcinoma) (Hsp70 interacting protein)                                                                                 | 2.28   | 0.40 |
| 203217_s_at  | <b>ST3GAL5</b>   | 8869 ST3 beta-galactoside alpha-2,3-sialyltransferase 5                                                                     | 7.62   | 0.00 |
| 205026_at    | <b>STAT5B</b>    | 6777 signal transducer and activator of transcription 5B                                                                    | -3.74  | 0.00 |
| 220187_at    | <b>STEAP4</b>    | 79689 STEAP family member 4                                                                                                 | 2.45   | 0.00 |
| 204068_at    | <b>STK3</b>      | 6788 serine/threonine kinase 3 (STE20 homolog, yeast)                                                                       | 2.16   | 0.00 |
| 217874_at    | <b>SUCLG1</b>    | 8802 succinate-CoA ligase, GDP-forming, alpha subunit<br>SGT1, suppressor of G2 allele of SKP1 (S.                          | 3.95   | 0.00 |
| 223330_s_at  | <b>SUGT1</b>     | 10910 cerevisiae)                                                                                                           | 2.65   | 0.90 |
| 226850_at    | <b>SUMF1</b>     | 285362 sulfatase modifying factor 1                                                                                         | 3.62   | 0.44 |
| 32402_s_at   | <b>SYMPK</b>     | 8189 symplekin<br>synaptotagmin binding, cytoplasmic RNA                                                                    | 3.91   | 0.44 |
| 217834_s_at  | <b>SYNCRIP</b>   | 10492 interacting protein<br>TAF3 RNA polymerase II, TATA box binding                                                       | 2.13   | 0.27 |
| 235154_at    | <b>TAF3</b>      | 83860 protein (TBP)-associated factor, 140kDa                                                                               | 3.83   | 0.00 |
| 1552542_s_at | <b>TAGAP</b>     | 117289 T-cell activation GTPase activating protein                                                                          | 2.01   | 0.00 |
|              | <b>TARP ///</b>  | 445347 /// T cell receptor gamma constant 2 /// T cell                                                                      |        |      |
|              | <b>TRGC2 ///</b> | 6967 /// receptor gamma variable 9 /// TCR gamma                                                                            |        |      |
| 216920_s_at  | <b>TRGV9</b>     | 6983 alternate reading frame protein                                                                                        | -2.47  | 0.18 |
| 201263_at    | <b>TARS</b>      | 6897 threonyl-tRNA synthetase                                                                                               | 3.63   | 0.23 |
| 203667_at    | <b>TBCA</b>      | 6902 tubulin folding cofactor A                                                                                             | 2.59   | 0.40 |
| 213400_s_at  | <b>TBL1X</b>     | 6907 transducin (beta)-like 1X-linked                                                                                       | 2.35   | 0.44 |
| 203135_at    | <b>TBP</b>       | 6908 TATA box binding protein                                                                                               | 2.44   | 0.63 |

|              |                                      |                                                                                                     |        |      |
|--------------|--------------------------------------|-----------------------------------------------------------------------------------------------------|--------|------|
| 202396_at    | <b>TCERG1</b>                        | 10915 transcription elongation regulator 1                                                          | 4.81   | 0.63 |
| 204849_at    | <b>TCFL5</b>                         | 10732 transcription factor-like 5 (basic helix-loop-helix)                                          | -3.91  | 0.00 |
| 212083_at    | <b>TEX261</b>                        | 113419 testis expressed 261                                                                         | 3.57   | 0.63 |
| 212330_at    | <b>TFDP1</b>                         | 7027 transcription factor Dp-1                                                                      | -2.61  | 0.00 |
| 207332_s_at  | <b>TFRC</b>                          | 7037 transferrin receptor (p90, CD71)                                                               | -4.62  | 0.00 |
| 203085_s_at  | <b>TGFB1</b>                         | 7040 transforming growth factor, beta 1                                                             | 2.99   | 0.90 |
| 201506_at    | <b>TGFBI</b>                         | 7045 transforming growth factor, beta-induced, 68kDa<br>transglutaminase 3 (E polypeptide, protein- | 2.85   | 0.63 |
| 206004_at    | <b>TGM3</b>                          | 7053 glutamine-gamma-glutamyltransferase)                                                           | -7.20  | 0.40 |
| 201110_s_at  | <b>THBS1</b>                         | 7057 thrombospondin 1<br>tRNA-histidine guanylyltransferase 1-like (S.                              | -8.06  | 0.27 |
| 219122_s_at  | <b>THG1L</b>                         | 54974 cerevisiae)<br>translocase of inner mitochondrial membrane 23                                 | 2.05   | 0.63 |
| 218118_s_at  | <b>TIMM23</b>                        | 10431 homolog (yeast)<br>translocase of inner mitochondrial membrane 8                              | 3.82   | 0.11 |
| 218357_s_at  | <b>TIMM8B</b>                        | 26521 homolog B (yeast)                                                                             | 3.02   | 0.11 |
| 201666_at    | <b>TIMP1</b>                         | 7076 TIMP metalloproteinase inhibitor 1                                                             | -3.75  | 0.44 |
| 201922_at    | <b>TINP1</b>                         | 10412 TGF beta-inducible nuclear protein 1                                                          | 3.69   | 0.23 |
| 216370_s_at  | <b>TKTL1</b>                         | 8277 transketolase-like 1<br>transducin-like enhancer of split 3 (E(sp1)                            | -2.66  | 0.15 |
| 212769_at    | <b>TLE3</b>                          | 7090 homolog, Drosophila)                                                                           | -2.22  | 0.40 |
| 213550_s_at  | <b>TMCO6</b>                         | 55374 transmembrane and coiled-coil domains 6                                                       | 2.19   | 0.63 |
| 219690_at    | <b>TMEM149</b>                       | 79713 transmembrane protein 149                                                                     | 5.12   | 0.00 |
| 1558281_a_at | <b>TMEM184A</b>                      | 202915 transmembrane protein 184A                                                                   | -2.59  | 0.23 |
| 241392_at    | <b>TMEM39A</b>                       | 55254 Transmembrane protein 39A                                                                     | -3.32  | 0.44 |
| 217795_s_at  | <b>TMEM43</b>                        | 79188 transmembrane protein 43                                                                      | 2.13   | 0.27 |
| 226083_at    | <b>TMEM70</b>                        | 54968 transmembrane protein 70                                                                      | 2.86   | 0.11 |
| 212204_at    | <b>TMEM87A</b>                       | 25963 transmembrane protein 87A                                                                     | 2.36   | 0.44 |
| 217733_s_at  | <b>TMSB10</b>                        | 9168 thymosin, beta 10<br>tumor necrosis factor receptor superfamily,                               | 2.08   | 0.00 |
| 1552648_a_at | <b>TNFRSF10A</b>                     | 8797 member 10a<br>tumor necrosis factor receptor superfamily,                                      | 2.59   | 0.40 |
| 206729_at    | <b>TNFRSF8</b><br><b>TNFSF12-</b>    | 943 member 8<br>tumor necrosis factor (ligand) superfamily,                                         | -7.55  | 0.18 |
| 209500_x_at  | <b>TNFSF13 ///</b><br><b>TNFSF13</b> | 407977 /// member 13 /// tumor necrosis factor (ligand)<br>superfamily, member 12-member 13         | 7.83   | 0.00 |
| 229326_at    | <b>TNFSF13</b>                       | 8741 member 13<br>Tumor necrosis factor (ligand) superfamily,                                       | 6.16   | 0.00 |
| 206907_at    | <b>TNFSF9</b>                        | 8744 member 9<br>tumor necrosis factor (ligand) superfamily,                                        | -20.09 | 0.40 |
| 220655_at    | <b>TNIP3</b>                         | 79931 TNFAIP3 interacting protein 3<br>translocase of outer mitochondrial membrane 22               | -44.67 | 0.00 |
| 222474_s_at  | <b>TOMM22</b>                        | 56993 homolog (yeast)<br>translocase of outer mitochondrial membrane 70                             | 3.68   | 0.00 |
| 201519_at    | <b>TOMM70A</b>                       | 9868 homolog A (S. cerevisiae)                                                                      | 4.00   | 0.63 |
| 215411_s_at  | <b>TRAF3IP2</b>                      | 10758 TRAF3 interacting protein 2                                                                   | -26.41 | 0.00 |
| 205804_s_at  | <b>TRAF3IP3</b>                      | 80342 TRAF3 interacting protein 3                                                                   | -5.87  | 0.00 |
| 218403_at    | <b>TRIAP1</b>                        | 51499 TP53 regulated inhibitor of apoptosis 1                                                       | 6.39   | 0.00 |
| 212118_at    | <b>TRIM27</b>                        | 5987 tripartite motif-containing 27                                                                 | 2.91   | 0.44 |
| 202734_at    | <b>TRIP10</b>                        | 9322 thyroid hormone receptor interactor 10                                                         | -5.39  | 0.15 |
| 222768_s_at  | <b>TRMT6</b>                         | 51605 tRNA methyltransferase 6 homolog (S. cerevisiae)                                              | 3.72   | 0.00 |
| 225235_at    | <b>TSPAN17</b>                       | 26262 tetraspanin 17                                                                                | 5.43   | 0.11 |
| 202096_s_at  | <b>TSPO</b>                          | 706 translocator protein (18kDa)                                                                    | 3.92   | 0.40 |
| 201113_at    | <b>TUFM</b>                          | 7284 Tu translation elongation factor, mitochondrial                                                | 2.42   | 0.63 |
| 225406_at    | <b>TWSG1</b>                         | 57045 twisted gastrulation homolog 1 (Drosophila)                                                   | 4.82   | 0.27 |
| 224511_s_at  | <b>TXNDC17</b>                       | 84817 thioredoxin domain containing 17                                                              | 2.18   | 0.63 |

|              |                |                                                                                                 |       |      |
|--------------|----------------|-------------------------------------------------------------------------------------------------|-------|------|
| 205890_s_at  | <b>UBD</b>     | 10537 ubiquitin D                                                                               | 4.55  | 0.00 |
| 225783_at    | <b>UBE2F</b>   | 140739 ubiquitin-conjugating enzyme E2F (putative)<br>ubiquitin-conjugating enzyme E2G 2 (UBC7) | 2.36  | 0.63 |
| 209042_s_at  | <b>UBE2G2</b>  | 7327 homolog, yeast)<br>Ubiquitin-conjugating enzyme E2I (UBC9)                                 | 3.47  | 0.00 |
| 213536_s_at  | <b>UBE2I</b>   | 7329 homolog, yeast)                                                                            | 2.50  | 0.44 |
| 218082_s_at  | <b>UBP1</b>    | 7342 upstream binding protein 1 (LBP-1a)                                                        | 2.46  | 0.44 |
| 224827_at    | <b>UBTD2</b>   | 92181 ubiquitin domain containing 2                                                             | -2.16 | 0.44 |
| 203271_s_at  | <b>UNC119</b>  | 9094 unc-119 homolog (C. elegans)                                                               | -3.39 | 0.18 |
| 212144_at    | <b>UNC84B</b>  | 25777 unc-84 homolog B (C. elegans)                                                             | 2.26  | 0.23 |
| 202233_s_at  | <b>UQCRH</b>   | 7388 ubiquinol-cytochrome c reductase hinge protein                                             | 2.15  | 0.00 |
| 220419_s_at  | <b>USP25</b>   | 29761 ubiquitin specific peptidase 25                                                           | 2.10  | 0.00 |
| 212513_s_at  | <b>USP33</b>   | 23032 ubiquitin specific peptidase 33<br>UTP11-like, U3 small nucleolar ribonucleoprotein,      | 2.03  | 0.63 |
| 218235_s_at  | <b>UTP11L</b>  | 51118 (yeast)<br>UTP18, small subunit (SSU) processome                                          | 2.94  | 0.11 |
| 203721_s_at  | <b>UTP18</b>   | 51096 component, homolog (yeast)<br>vesicle-associated membrane protein 3                       | 6.80  | 0.11 |
| 201336_at    | <b>VAMP3</b>   | 9341 (cellubrevin)<br>Vesicle-associated membrane protein 5                                     | 2.77  | 0.23 |
| 214115_at    | <b>VAMP5</b>   | 10791 (myobrevin)<br>vesicle-associated membrane protein 8                                      | 7.18  | 0.00 |
| 202546_at    | <b>VAMP8</b>   | 8673 (endobrevin)                                                                               | 9.20  | 0.00 |
| 208846_s_at  | <b>VDAC3</b>   | 7419 voltage-dependent anion channel 3                                                          | 2.25  | 0.44 |
| 210512_s_at  | <b>VEGFA</b>   | 7422 vascular endothelial growth factor A<br>vezatin, adherens junctions transmembrane          | -2.09 | 0.00 |
| 223675_s_at  | <b>VEZT</b>    | 55591 protein                                                                                   | 3.87  | 0.63 |
| 1558549_s_at | <b>VNN1</b>    | 8876 vanin 1                                                                                    | -2.87 | 0.63 |
| 205922_at    | <b>VNN2</b>    | 8875 vanin 2                                                                                    | -2.59 | 0.00 |
| 1553514_a_at | <b>VNN3</b>    | 55350 vanin 3<br>vacuolar protein sorting 13 homolog D (S.                                      | -4.42 | 0.00 |
| 212323_s_at  | <b>VPS13D</b>  | 55187 cerevisiae)                                                                               | -4.96 | 0.18 |
| 218882_s_at  | <b>WDR3</b>    | 10885 WD repeat domain 3                                                                        | 2.83  | 0.44 |
| 238677_at    | <b>WDR36</b>   | 134430 WD repeat domain 36                                                                      | 6.54  | 0.40 |
| 221531_at    | <b>WDR61</b>   | 80349 WD repeat domain 61                                                                       | 2.58  | 0.63 |
| 224748_at    | <b>WDR68</b>   | 10238 WD repeat domain 68                                                                       | 2.88  | 0.23 |
| 222489_s_at  | <b>WRNIP1</b>  | 56897 Werner helicase interacting protein 1                                                     | 2.14  | 0.63 |
| 231899_at    | <b>ZC3H12C</b> | 85463 zinc finger CCCH-type containing 12C                                                      | -3.75 | 0.63 |
| 203556_at    | <b>ZHX2</b>    | 22882 zinc fingers and homeoboxes 2                                                             | -2.06 | 0.00 |
| 209049_s_at  | <b>ZMYND8</b>  | 23613 zinc finger, MYND-type containing 8                                                       | -6.28 | 0.15 |
| 205739_x_at  | <b>ZNF107</b>  | 51427 zinc finger protein 107                                                                   | -9.99 | 0.40 |
| 200050_at    | <b>ZNF146</b>  | 7705 zinc finger protein 146                                                                    | 2.10  | 0.40 |
| 213452_at    | <b>ZNF184</b>  | 7738 zinc finger protein 184                                                                    | 3.51  | 0.18 |
| 212368_at    | <b>ZNF292</b>  | 23036 zinc finger protein 292                                                                   | -2.02 | 0.90 |
| 222283_at    | <b>ZNF480</b>  | 147657 zinc finger protein 480                                                                  | 3.77  | 0.27 |
| 39891_at     | <b>ZNF710</b>  | 374655 zinc finger protein 710                                                                  | -2.07 | 0.00 |
| 226261_at    | <b>ZNRF2</b>   | 223082 zinc and ring finger 2                                                                   | -2.15 | 0.63 |

### Protein abundance significantly changed in response to LPS (fold change = LPS/Control)

| IPI           | Protein Symbol | Protein Name                                    | Log2 Ratio | Q-value |
|---------------|----------------|-------------------------------------------------|------------|---------|
| IPI00022975.1 | <b>ALOX5AP</b> | ARACHIDONATE 5-LIPOXYGENASE-ACTIVATING PROTEIN. | 1.66       | 0.02    |
| IPI00220390.4 | <b>ANKRD7</b>  | ANKYRIN REPEAT DOMAIN-CONTAINING PROTEIN 7.     | 1.31       | 0.04    |
| IPI00038356.3 | <b>ARG1</b>    | 25 KDA PROTEIN.                                 | 1.74       | 0.02    |

|               |                  |                                                                        |       |      |
|---------------|------------------|------------------------------------------------------------------------|-------|------|
| IPI00014256.2 | <b>ARHGEF6</b>   | ISOFORM 1 OF RHO GUANINE NUCLEOTIDE EXCHANGE FACTOR 6.                 | 2.23  | 0.01 |
| IPI00007280.9 | <b>ARPC5</b>     | 17 KDA PROTEIN.                                                        | 2.01  | 0.01 |
| IPI00296362.6 | <b>ASPM</b>      | ISOFORM 1 OF ABNORMAL SPINDLE-LIKE MICROCEPHALY-ASSOCIATED PROTEIN.    | 1.97  | 0.02 |
| IPI00328350.6 | <b>C1orf24</b>   | NIBAN PROTEIN.                                                         | -5.27 | 0.02 |
| IPI00008274.5 | <b>CAP1</b>      | ADENYLYL CYCLASE-ASSOCIATED PROTEIN 1.                                 | 1.19  | 0.02 |
| IPI00550587.3 | <b>CEP290</b>    | CDNA FLJ13615 FIS, CLONE PLACE1010896, WEAKLY SIMILAR TO NUF1 PROTEIN. | 1.29  | 0.02 |
| IPI00472901.2 | <b>CHD7</b>      | CHROMODOMAIN HELICASE DNA BINDING PROTEIN 7.                           | 2.41  | 0.04 |
| IPI00022744.5 | <b>CSE1L</b>     | ISOFORM 1 OF EXPORTIN-2.                                               | 1.23  | 0.03 |
| IPI00029485.2 | <b>DCTN1</b>     | ISOFORM P150 OF DYNACTIN-1.                                            | -1.57 | 0.03 |
| IPI00396370.5 | <b>EIF3S9</b>    | ISOFORM 1 OF EUKARYOTIC TRANSLATION INITIATION FACTOR 3 SUBUNIT 9.     | 1.73  | 0.01 |
| IPI00006574.1 | <b>FAM49A</b>    | PROTEIN FAM49A.                                                        | 1.39  | 0.03 |
| IPI00029625.4 | <b>FLOT2</b>     | FLOTILLIN 2.                                                           | -2.91 | 0.03 |
| IPI00456878.2 | <b>GVIN1</b>     | PREDICTED: GTPASE, VERY LARGE INTERFERON INDUCIBLE 1.                  | -4.06 | 0.01 |
| IPI00217468.2 | <b>HIST1H1B</b>  | HISTONE H1.5.                                                          | 1.71  | 0.01 |
| IPI00419833.6 | <b>HIST1H2BK</b> | HISTONE H2B TYPE 1-K.                                                  | 3.02  | 0.03 |
| IPI00018534.3 | <b>HIST1H2BL</b> | HISTONE H2B TYPE 1-L.                                                  | 1.06  | 0.03 |
| IPI00216592.2 | <b>HNRPC</b>     | ISOFORM C1 OF HETEROGENEOUS NUCLEAR RIBONUCLEOPROTEINS C1/C2.          | 1.86  | 0.02 |
| IPI00171903.1 | <b>HNRPM</b>     | HETEROGENEOUS NUCLEAR RIBONUCLEOPROTEIN M ISOFORM A.                   | 1.32  | 0.02 |
| IPI00647205.1 | <b>KIAA0408</b>  | RIBONUCLEOPROTEIN M ISOFORM A.                                         | 1.32  | 0.02 |
| IPI00299547.4 | <b>LCN2</b>      | HYPOTHETICAL PROTEIN LOC387104.                                        | -6.28 | 0.01 |
| IPI00465431.6 | <b>LGALS3</b>    | NEUTROPHIL GELATINASE-ASSOCIATED LIPOCALIN PRECURSOR.                  | -1.72 | 0.02 |
| IPI00018278.2 | <b>LOC285957</b> | GALECTIN-3.                                                            | 1.19  | 0.03 |
| IPI00003734.1 | <b>LOC347701</b> | HISTONE H2AV.                                                          | 1.17  | 0.02 |
| IPI00383071.1 | <b>LOC388642</b> | PUTATIVE S100 CALCIUM-BINDING PROTEIN H_NH0456N16.1.                   | -1.61 | 0.04 |
| IPI00419154.1 | <b>LOC388692</b> | RCTPI1 (FRAGMENT).                                                     | 1.24  | 0.03 |
| IPI00374686.3 | <b>LOC647474</b> | CDNA FLJ41668 FIS, CLONE FEBRA2028477.                                 | 1.35  | 0.04 |
| IPI00401834.2 | <b>LOC648976</b> | PREDICTED: SIMILAR TO HETEROGENEOUS NUCLEAR RIBONUCLEOPROTEIN A3       | 1.44  | 0.04 |
| IPI00219871.4 | <b>LSM8</b>      | ISOFORM 1.                                                             | 1.44  | 0.04 |
| IPI00013260.3 | <b>LSP1</b>      | PREDICTED: HYPOTHETICAL PROTEIN XP_934530.                             | -4.28 | 0.04 |
| IPI00303882.2 | <b>M6PRBP1</b>   | U6 SNRNA-ASSOCIATED SM-LIKE PROTEIN LSM8.                              | -1.98 | 0.03 |
| IPI00030919.3 | <b>MAP2K1IP1</b> | LYMPHOCYTE-SPECIFIC PROTEIN 1.                                         | 1.15  | 0.03 |
| IPI00457110.1 | <b>MCTP2</b>     | ISOFORM B OF MANNOSE-6-PHOSPHATE RECEPTOR-BINDING PROTEIN 1.           | -1.64 | 0.02 |
| IPI00027509.3 | <b>MMP9</b>      | MITOGEN-ACTIVATED PROTEIN KINASE KINASE 1-INTERACTING PROTEIN 1.       | -2.37 | 0.03 |
| IPI00000105.3 | <b>MVP</b>       | MCTP2.                                                                 | -2.06 | 0.03 |
| IPI00444262.1 | <b>NCL</b>       | MATRIX METALLOPROTEINASE-9 PRECURSOR.                                  | -2.57 | 0.01 |
|               |                  | MAJOR VAULT PROTEIN.                                                   | -3.69 | 0.02 |
|               |                  | CDNA FLJ45706 FIS, CLONE FEBRA2028457, HIGHLY SIMILAR TO NUCLEOLIN.    | -4.85 | 0.01 |

|               |                      |                                                                                                                                               |       |      |
|---------------|----------------------|-----------------------------------------------------------------------------------------------------------------------------------------------|-------|------|
| IPI00299571.4 | <b>PDIA6</b>         | CDNA FLJ45525 FIS, CLONE BRTHA2026311, HIGHLY SIMILAR TO PROTEIN DISULFIDE ISOMERASE A6.                                                      | -3.26 | 0.02 |
| IPI00329185.3 | <b>PLCG2</b>         | 1-PHOSPHATIDYLINOSITOL-4,5-BISPHOSPHATE PHOSPHODIESTERASE GAMMA 2.                                                                            | 1.41  | 0.03 |
| IPI00235481.2 | <b>PMFBP1</b>        | PMFBP1 PROTEIN.                                                                                                                               | -2.75 | 0.04 |
| IPI00027808.1 | <b>POLR2B</b>        | DNA-DIRECTED RNA POLYMERASE II 140 KDA POLYPEPTIDE.                                                                                           | -4.35 | 0.02 |
| IPI00168184.7 | <b>PPP2R1A</b>       | CDNA FLJ34068 FIS, CLONE FCBBF3001918, HIGHLY SIMILAR TO SERINE/THREONINE PROTEIN PHOSPHATASE 2A, 65 KDA REGULATORY SUBUNIT A, ALPHA ISOFORM. | -2.97 | 0.02 |
| IPI00016169.1 | <b>PRO0471</b>       | PRO0471.                                                                                                                                      | 1.43  | 0.02 |
| IPI00419433.2 | <b>RAB11FIP1</b>     | ISOFORM 1 OF RAB11 FAMILY-INTERACTING PROTEIN 1.                                                                                              | -3.41 | 0.02 |
| IPI00221325.3 | <b>RANBP2</b>        | RAN-BINDING PROTEIN 2.                                                                                                                        | -4.67 | 0.02 |
| IPI00409720.3 | <b>REEP2</b>         | 22 KDA PROTEIN.                                                                                                                               | -1.74 | 0.01 |
| IPI00028108.1 | <b>RGS19</b>         | REGULATOR OF G-PROTEIN SIGNALING 19.                                                                                                          | -1.08 | 0.01 |
| IPI00027569.1 | <b>RNF187</b>        | HETEROGENEOUS NUCLEAR RIBONUCLEOPROTEIN C-LIKE 1.                                                                                             | -3.84 | 0.03 |
| IPI00162563.5 | <b>RNF40</b>         | ISOFORM 1 OF UBIQUITIN-PROTEIN LIGASE BRE1B.                                                                                                  | -4.10 | 0.02 |
| IPI00453473.5 | <b>RP11-444E17.2</b> | HISTONE H4.                                                                                                                                   | 1.27  | 0.02 |
| IPI00026627.3 | <b>RP2</b>           | PROTEIN XRP2.                                                                                                                                 | 1.43  | 0.04 |
| IPI00465429.3 | <b>RUFY1</b>         | ISOFORM 2 OF RUN AND FYVE DOMAIN-CONTAINING PROTEIN 1.                                                                                        | -3.21 | 0.04 |
| IPI00218131.2 | <b>S100A12</b>       | PROTEIN S100-A12.                                                                                                                             | -1.40 | 0.02 |
| IPI00305457.5 | <b>SERPINA1</b>      | PRO2275.                                                                                                                                      | 1.69  | 0.02 |
| IPI00010402.2 | <b>SH3BGR13</b>      | HYPOTHETICAL PROTEIN.                                                                                                                         | 1.00  | 0.02 |
| IPI00172421.6 | <b>SKP1A</b>         | ISOFORM 2 OF S-PHASE KINASE-ASSOCIATED PROTEIN 1A.                                                                                            | -4.25 | 0.03 |
| IPI00003527.4 | <b>SLC9A3R1</b>      | EZRIN-RADIXIN-MOESIN-BINDING PHOSPHOPROTEIN 50.                                                                                               | 1.63  | 0.01 |
| IPI00783228.1 | <b>SPTB</b>          | SPECTRIN BETA ISOFORM B.                                                                                                                      | -2.75 | 0.02 |
| IPI00297492.1 | <b>STT3A</b>         | DOLICHYL-DIPHOSPHOOLIGOSACCHARIDE--PROTEIN GLYCOSYLTRANSFERASE SUBUNIT STT3A.                                                                 | 1.26  | 0.02 |
| IPI00291006.1 | <b>STYXL1</b>        | MALATE DEHYDROGENASE, MITOCHONDRIAL PRECURSOR.                                                                                                | -2.49 | 0.02 |
| IPI00219274.3 | <b>SYT2</b>          | SYNAPTOTAGMIN-2.                                                                                                                              | -1.11 | 0.03 |
| IPI00011727.2 | <b>SYT5</b>          | SYNAPTOTAGMIN-5.                                                                                                                              | -5.70 | 0.04 |
| IPI00030536.5 | <b>SYTL2</b>         | CDNA FLJ16407 FIS, CLONE UTERU2028734, HIGHLY SIMILAR TO MUS MUSCULUS SLP2-A SYNAPTOTAGMIN-LIKE PROTEIN 2-A DELTA 2S-III.                     | -4.02 | 0.02 |
| IPI00019381.4 | <b>TMEM30A</b>       | ISOFORM 1 OF CELL CYCLE CONTROL PROTEIN 50A.                                                                                                  | 2.14  | 0.01 |
| IPI00220827.4 | <b>TMSB10</b>        | THYMOSIN BETA-10.                                                                                                                             | -1.80 | 0.03 |
| IPI00023761.3 | <b>TTL3</b>          | TUBULIN TYROSINE LIGASE-LIKE FAMILY, MEMBER 3 ISOFORM 1.                                                                                      | 2.47  | 0.04 |
| IPI00011696.1 | <b>VAV1</b>          | PROTO-ONCOGENE VAV.                                                                                                                           | 1.54  | 0.01 |
| IPI00031583.2 | <b>VDP</b>           | HYPOTHETICAL PROTEIN DKFZP451D234.                                                                                                            | -1.80 | 0.02 |
| IPI00216318.5 | <b>YWHAB</b>         | TYROSINE 3-MONOOXYGENASE/TRYPHTOPHAN 5-MONOOXYGENASE ACTIVATION PROTEIN, BETA POLYPEPTIDE.                                                    | 1.45  | 0.02 |



**Protein abundance significantly changed in response to GM+I (fold change = GM+I/Control)**

| IPI                | Protein Symbol   | Protein Name                                                                                         | Log2 Ratio | Q-value |
|--------------------|------------------|------------------------------------------------------------------------------------------------------|------------|---------|
| IPI:IPI00465439.4  | <b>ALDOA</b>     | FRUCTOSE-BISPHOSPHATE ALDOLASE A. ARACHIDONATE 5-LIPOXYGENASE-ACTIVATING PROTEIN.                    | 1.06       | 0.03    |
| IPI:IPI00022975.1  | <b>ALOX5AP</b>   | ANNEXIN IV.                                                                                          | 1.77       | 0.01    |
| IPI:IPI00221225.3  | <b>ANXA4</b>     | ANNEXIN A5.                                                                                          | 2.00       | 0.02    |
| IPI:IPI00329801.11 | <b>ANXA5</b>     | 25 KDA PROTEIN.                                                                                      | 1.41       | 0.05    |
| IPI:IPI00038356.3  | <b>ARG1</b>      | ISOFORM 1 OF ARGINASE-1.                                                                             | 1.84       | 0.03    |
| IPI:IPI00291560.4  | <b>ARG1</b>      | ISOFORM 1 OF RHO GUANINE NUCLEOTIDE EXCHANGE FACTOR 6.                                               | -4.15      | 0.02    |
| IPI:IPI00014256.2  | <b>ARHGEF6</b>   | ISOFORM 1 OF ABNORMAL SPINDLE-LIKE MICROCEPHALY-ASSOCIATED PROTEIN.                                  | 2.52       | 0.03    |
| IPI:IPI00296362.6  | <b>ASPM</b>      | ADENYLYL CYCLASE-ASSOCIATED PROTEIN 1.                                                               | 1.94       | 0.03    |
| IPI:IPI00008274.5  | <b>CAP1</b>      | MACROPHAGE CAPPING PROTEIN.                                                                          | 1.11       | 0.03    |
| IPI:IPI00027341.1  | <b>CAPG</b>      | CDNA FLJ13615 FIS, CLONE PLACE1010896, WEAKLY SIMILAR TO NUF1 PROTEIN.                               | 1.15       | 0.01    |
| IPI:IPI00550587.3  | <b>CEP290</b>    | COFILIN-1.                                                                                           | 1.72       | 0.01    |
| IPI:IPI00012011.5  | <b>CFL1</b>      | CLATHRIN HEAVY CHAIN 1.                                                                              | 1.02       | 0.03    |
| IPI:IPI00024067.3  | <b>CLTC</b>      | ISOFORM 1 OF EXPORTIN-2.                                                                             | -2.25      | 0.04    |
| IPI:IPI00022744.5  | <b>CSE1L</b>     | CYTOCHROME B-245 LIGHT CHAIN.                                                                        | 1.34       | 0.03    |
| IPI:IPI00218433.4  | <b>CYBA</b>      | CYTOCHROME B-245 HEAVY CHAIN.                                                                        | 1.08       | 0.03    |
| IPI:IPI00218646.2  | <b>CYBB</b>      | CYTOCHROME P450 27, MITOCHONDRIAL PRECURSOR.                                                         | 1.09       | 0.03    |
| IPI:IPI00025307.1  | <b>CYP27A1</b>   | THYMIDINE PHOSPHORYLASE PRECURSOR.                                                                   | 1.44       | 0.04    |
| IPI:IPI00292858.4  | <b>ECGF1</b>     | PEROXISOMAL BIFUNCTIONAL ENZYME.                                                                     | 2.28       | 0.04    |
| IPI:IPI00216164.2  | <b>EHHADH</b>    | ECHINODERM MICROTUBULE ASSOCIATED PROTEIN LIKE 3.                                                    | 2.27       | 0.04    |
| IPI:IPI00167909.4  | <b>EML3</b>      | PROTEIN FAM49A.                                                                                      | 1.04       | 0.04    |
| IPI:IPI00006574.1  | <b>FAM49A</b>    | FLJ00024 PROTEIN (FRAGMENT).                                                                         | 1.45       | 0.04    |
| IPI:IPI00025494.1  | <b>FAM78A</b>    | FLOTILLIN 2.                                                                                         | 2.14       | 0.03    |
| IPI:IPI00029625.4  | <b>FLOT2</b>     | ISOFORM 2 OF GENERAL CONTROL OF AMINO ACID SYNTHESIS PROTEIN 5-LIKE 2. PREDICTED: GTPASE, VERY LARGE | -2.45      | 0.04    |
| IPI:IPI00221199.1  | <b>GCN5L2</b>    | INTERFERON INDUCIBLE 1.                                                                              | 1.70       | 0.03    |
| IPI:IPI00456878.2  | <b>GVIN1</b>     | HEMOGLOBIN SUBUNIT DELTA.                                                                            | -1.99      | 0.03    |
| IPI:IPI00473011.2  | <b>HBD</b>       | HISTONE H1.5.                                                                                        | -2.75      | 0.03    |
| IPI:IPI00217468.2  | <b>HIST1H1B</b>  | HISTONE H1.2.                                                                                        | 1.96       | 0.01    |
| IPI:IPI00217465.4  | <b>HIST1H1C</b>  | HISTONE H2B TYPE 1-B.                                                                                | 1.44       | 0.03    |
| IPI:IPI00220403.2  | <b>HIST1H2BB</b> | HISTONE H2B TYPE 1-K.                                                                                | 3.23       | 0.04    |
| IPI:IPI00419833.6  | <b>HIST1H2BK</b> | HISTONE H2B TYPE 2-E.                                                                                | 2.78       | 0.04    |
| IPI:IPI00003935.5  | <b>HIST2H2BE</b> | ISOFORM C1 OF HETEROGENEOUS NUCLEAR RIBONUCLEOPROTEINS C1/C2.                                        | 1.11       | 0.03    |
| IPI:IPI00216592.2  | <b>HNRPC</b>     | PROTEIN KIAA0157.                                                                                    | 1.63       | 0.03    |
| IPI:IPI00299517.3  | <b>KIAA0157</b>  | HYPOTHETICAL PROTEIN LOC387104.                                                                      | -2.44      | 0.03    |
| IPI:IPI00647205.1  | <b>KIAA0408</b>  | HYPOTHETICAL PROTEIN LOC57471 ISOFORM B.                                                             | -3.11      | 0.02    |
| IPI:IPI00006746.3  | <b>KIAA1189</b>  | PREDICTED: SIMILAR TO NUCLEAR LOCALIZED FACTOR 2.                                                    | 1.25       | 0.03    |
| IPI:IPI00739203.1  | <b>KIAA1957</b>  | ISOFORM HMW OF KININOGEN-1 PRECURSOR.                                                                | 2.57       | 0.03    |
| IPI:IPI00032328.1  | <b>KNG1</b>      | LYMPHOCYTE CYTOSOLIC PROTEIN 2.                                                                      | 2.54       | 0.03    |
| IPI:IPI00297169.1  | <b>LCP2</b>      | GALECTIN-3.                                                                                          | -1.22      | 0.04    |
| IPI:IPI00465431.6  | <b>LGALS3</b>    | ISOFORM 2 OF HMG BOX TRANSCRIPTION FACTOR BBX.                                                       | 1.23       | 0.03    |
| IPI:IPI00183699.3  | <b>LOC151657</b> |                                                                                                      | -2.12      | 0.04    |

|                   |                  |                                                                               |       |      |
|-------------------|------------------|-------------------------------------------------------------------------------|-------|------|
| IPI:IPI00145540.7 | <b>LOC402643</b> | PREDICTED: SIMILAR TO TROPOMYOSIN 3 ISOFORM 2.                                | 1.04  | 0.03 |
| IPI:IPI00374686.3 | <b>LOC647474</b> | PREDICTED: SIMILAR TO HETEROGENEOUS NUCLEAR RIBONUCLEOPROTEIN A3 ISOFORM 1.   | 1.79  | 0.03 |
| IPI:IPI00401834.2 | <b>LOC648976</b> | PREDICTED: HYPOTHETICAL PROTEIN XP_934530.                                    | -4.88 | 0.05 |
| IPI:IPI00013260.3 | <b>LSP1</b>      | LYMPHOCYTE-SPECIFIC PROTEIN 1.                                                | 1.35  | 0.04 |
| IPI:IPI00298793.4 | <b>MANBA</b>     | BETA-MANNOSIDASE PRECURSOR.                                                   | 1.48  | 0.04 |
| IPI:IPI00027509.3 | <b>MMP9</b>      | MATRIX METALLOPROTEINASE-9 PRECURSOR.                                         | -1.82 | 0.01 |
| IPI:IPI00000105.3 | <b>MVP</b>       | MAJOR VAULT PROTEIN.                                                          | -3.54 | 0.02 |
| IPI:IPI00027255.1 | <b>MYL6B</b>     | MYOSIN LIGHT CHAIN 1, SLOW-TWITCH MUSCLE A ISOFORM.                           | 1.33  | 0.02 |
| IPI:IPI00444262.1 | <b>NCL</b>       | CDNA FLJ45706 FIS, CLONE FEBRA2028457, HIGHLY SIMILAR TO NUCLEOLIN.           | -6.12 | 0.03 |
| IPI:IPI00008307.1 | <b>PADI4</b>     | PROTEIN-ARGININE DEIMINASE TYPE-4.                                            | 1.03  | 0.03 |
| IPI:IPI00298547.3 | <b>PARK7</b>     | PROTEIN DJ-1.                                                                 | 1.26  | 0.04 |
| IPI:IPI00018873.1 | <b>PBEF1</b>     | ISOFORM 1 OF NICOTINAMIDE PHOSPHORIBOSYLTRANSFERASE.                          | 1.20  | 0.04 |
| IPI:IPI00218570.5 | <b>PGAM2</b>     | PHOSPHOGLYCERATE MUTASE 2.                                                    | 1.27  | 0.03 |
| IPI:IPI00329185.3 | <b>PLCG2</b>     | 1-PHOSPHATIDYLINOSITOL-4,5-BISPHOSPHATE PHOSPHODIESTERASE GAMMA 2.            | 1.80  | 0.03 |
| IPI:IPI00012865.1 | <b>PLD1</b>      | ISOFORM PLD1A OF PHOSPHOLIPASE D1.                                            | 1.66  | 0.04 |
| IPI:IPI00027808.1 | <b>POLR2B</b>    | DNA-DIRECTED RNA POLYMERASE II 140 KDA POLYPEPTIDE.                           | -3.64 | 0.03 |
| IPI:IPI00009316.3 | <b>PPIE</b>      | ISOFORM A OF PEPTIDYL-PROLYL CIS-TRANS ISOMERASE E.                           | -3.83 | 0.05 |
| IPI:IPI00044891.1 | <b>PRAM1</b>     | ADAPTOR MOLECULE-1.                                                           | -3.09 | 0.04 |
| IPI:IPI00024915.2 | <b>PRDX5</b>     | ISOFORM MITOCHONDRIAL OF PEROXIREDOXIN-5, MITOCHONDRIAL PRECURSOR.            | 1.37  | 0.03 |
| IPI:IPI00016169.1 | <b>PRO0471</b>   | PRO0471.                                                                      | 1.36  | 0.03 |
| IPI:IPI00004358.3 | <b>PYGB</b>      | GLYCOGEN PHOSPHORYLASE, BRAIN FORM.                                           | 1.37  | 0.02 |
| IPI:IPI00221325.3 | <b>RANBP2</b>    | RAN-BINDING PROTEIN 2.                                                        | -3.99 | 0.02 |
| IPI:IPI00016825.1 | <b>RGS18</b>     | REGULATOR OF G-PROTEIN SIGNALING 18.                                          | 1.48  | 0.04 |
| IPI:IPI00017342.1 | <b>RHOG</b>      | RHO-RELATED GTP-BINDING PROTEIN RHOG PRECURSOR.                               | 1.26  | 0.03 |
| IPI:IPI00162563.5 | <b>RNF40</b>     | ISOFORM 1 OF UBIQUITIN-PROTEIN LIGASE BRE1B.                                  | -3.78 | 0.04 |
| IPI:IPI00026627.3 | <b>RP2</b>       | BRE1B.                                                                        | -3.78 | 0.04 |
| IPI:IPI00021266.1 | <b>RPL23A</b>    | PROTEIN XRP2.                                                                 | 2.06  | 0.03 |
| IPI:IPI00027463.1 | <b>S100A6</b>    | 60S RIBOSOMAL PROTEIN L23A.                                                   | 3.23  | 0.04 |
| IPI:IPI00006640.3 | <b>SERPIN2</b>   | PROTEIN S100-A6.                                                              | -1.81 | 0.03 |
| IPI:IPI00181702.3 | <b>SFRS15</b>    | SERPIN I2 PRECURSOR.                                                          | -1.95 | 0.03 |
| IPI:IPI00010402.2 | <b>SH3BGR13</b>  | ISOFORM 1 OF SPLICING FACTOR, ARGININE/SERINE-RICH 15.                        | 1.21  | 0.03 |
| IPI:IPI00172421.6 | <b>SKP1A</b>     | HYPOTHETICAL PROTEIN.                                                         | 1.52  | 0.02 |
| IPI:IPI00783228.1 | <b>SPTB</b>      | ISOFORM 2 OF S-PHASE KINASE-ASSOCIATED PROTEIN 1A.                            | -4.27 | 0.01 |
| IPI:IPI00102936.3 | <b>SRP68</b>     | SPECTRIN BETA ISOFORM B.                                                      | -2.65 | 0.04 |
| IPI:IPI00297492.1 | <b>STT3A</b>     | ISOFORM 2 OF SIGNAL RECOGNITION PARTICLE 68 KDA PROTEIN.                      | 1.35  | 0.02 |
| IPI:IPI00291006.1 | <b>STYXL1</b>    | DOLICHYL-DIPHOSPHOOLIGOSACCHARIDE--PROTEIN GLYCOSYLTRANSFERASE SUBUNIT STT3A. | 1.96  | 0.01 |
|                   |                  | MALATE DEHYDROGENASE, MITOCHONDRIAL PRECURSOR.                                | -2.12 | 0.03 |

|                   |                |                                                                                                                                             |       |      |
|-------------------|----------------|---------------------------------------------------------------------------------------------------------------------------------------------|-------|------|
| IPI:IPI00219274.3 | <b>SYT2</b>    | SYNAPTOTAGMIN-2.<br>CDNA FLJ16407 FIS, CLONE UTERU2028734,<br>HIGHLY SIMILAR TO MUS MUSCULUS SLP2-A<br>SYNAPTOTAGMIN-LIKE PROTEIN 2-A DELTA | -1.58 | 0.04 |
| IPI:IPI00030536.5 | <b>SYTL2</b>   | 2S-III.<br>TRANSFORMING ACIDIC COILED-COIL-<br>CONTAINING PROTEIN 3.                                                                        | -3.84 | 0.01 |
| IPI:IPI00002135.1 | <b>TACC3</b>   | TUBULIN-SPECIFIC CHAPERONE A.                                                                                                               | 1.40  | 0.04 |
| IPI:IPI00217236.3 | <b>TBCA</b>    | ISOFORM 1 OF CELL CYCLE CONTROL<br>PROTEIN 50A.                                                                                             | 1.02  | 0.03 |
| IPI:IPI00019381.4 | <b>TMEM30A</b> | ISOFORM BETA-2 OF DNA TOPOISOMERASE 2-<br>BETA.                                                                                             | 1.97  | 0.01 |
| IPI:IPI00027280.2 | <b>TOP2B</b>   | ISOFORM 2 OF TUMOR PROTEIN D54.                                                                                                             | 1.53  | 0.02 |
| IPI:IPI00221178.1 | <b>TPD52L2</b> | 29 KDA PROTEIN.                                                                                                                             | 2.47  | 0.05 |
| IPI:IPI00178083.2 | <b>TPM3</b>    | TROPOMYOSIN 4.                                                                                                                              | 1.46  | 0.03 |
| IPI:IPI00010779.3 | <b>TPM4</b>    | TUBA6 PROTEIN.                                                                                                                              | 1.13  | 0.03 |
| IPI:IPI00166768.2 | <b>TUBA6</b>   | TUBULIN BETA-2 CHAIN.                                                                                                                       | 1.26  | 0.02 |
| IPI:IPI00011654.2 | <b>TUBB2A</b>  | VASODILATOR-STIMULATED<br>PHOSPHOPROTEIN.                                                                                                   | 1.60  | 0.01 |
| IPI:IPI00301058.4 | <b>VASP</b>    | SYNAPTIC VESICLE MEMBRANE PROTEIN VAT-<br>1 HOMOLOG.                                                                                        | 1.32  | 0.03 |
| IPI:IPI00156689.3 | <b>VAT1</b>    | PROTO-ONCOGENE VAV.                                                                                                                         | 1.76  | 0.03 |
| IPI:IPI00011696.1 | <b>VAV1</b>    | HYPOTHETICAL PROTEIN DKFZP451D234.                                                                                                          | 1.59  | 0.02 |
| IPI:IPI00031583.2 | <b>VDP</b>     |                                                                                                                                             | -1.76 | 0.04 |
| IPI:IPI00216699.1 | <b>ZC3H3</b>   | ISOFORM 2 OF UNC-112-RELATED PROTEIN 2.<br>15 KDA PROTEIN.                                                                                  | 1.36  | 0.03 |
| IPI:IPI00402104.5 |                |                                                                                                                                             | 2.00  | 0.03 |
