# Supplementary material
Source: PubMed Central journal article supplement (PMC3136804)
Supplement: NIHMS210118-supplement-4.pdf [file NIHMS210118-supplement-4.pdf]

**Supplementary Table 5. Gene expression across all subjects for the genes in Figure 2f comparing microfluidic isolation with Ficoll-dextran isolation.**

| Probe Set    | Gene Symbol                            | Gene Title                                                                          | qvalue(FDR) | Log <sub>2</sub> Expression for Bulk Ficoll-Dextran Isolated Neutrophils (B) and Microfluidic Isolation Neutrophils (M) for subjects 1-5 |      |      |      |      |      |      |      |      |      |
|--------------|----------------------------------------|-------------------------------------------------------------------------------------|-------------|------------------------------------------------------------------------------------------------------------------------------------------|------|------|------|------|------|------|------|------|------|
|              |                                        |                                                                                     |             | B1                                                                                                                                       | M1   | B2   | M2   | B3   | M3   | B4   | M4   | B5   | M5   |
| 1558365_at   | ---                                    | ---                                                                                 | 0.275045    | 7.05                                                                                                                                     | 3.21 | 6.12 | 6.42 | 6.37 | 4.33 | 6.79 | 4.08 | 7.03 | 4.07 |
| 222895_s_at  | BCL11B                                 | B-cell CLL/lymphoma 11B (zinc finger protein)                                       | 0.329638    | 6.12                                                                                                                                     | 3.56 | 4.29 | 6.52 | 7.18 | 3.95 | 8.59 | 4.39 | 7.9  | 4.64 |
| 232307_at    | ---                                    | ---                                                                                 | 0.329638    | 8.68                                                                                                                                     | 6.4  | 6.47 | 6.87 | 7.6  | 6.1  | 8.1  | 4.54 | 8.17 | 5.92 |
| 228180_at    | ---                                    | ---                                                                                 | 0.329638    | 6.6                                                                                                                                      | 5.6  | 5.85 | 6.01 | 6.38 | 5.57 | 7.78 | 3.88 | 6.61 | 5    |
| 215958_at    | ---                                    | ---                                                                                 | 0.363087    | 6.81                                                                                                                                     | 4.24 | 7.49 | 6.56 | 5.97 | 3.22 | 7.7  | 5.99 | 7.36 | 3.75 |
| 210479_s_at  | RORA                                   | RAR-related orphan receptor A                                                       | 0.42141     | 6.64                                                                                                                                     | 3.61 | 3.93 | 4.23 | 6.05 | 3.51 | 7.61 | 3.84 | 5.26 | 4.07 |
| 244719_at    | ---                                    | ---                                                                                 | 0.42141     | 9.14                                                                                                                                     | 3.35 | 7.65 | 3.33 | 4.47 | 3.92 | 7.14 | 3.56 | 7.28 | 3.12 |
| 228486_at    | SLC44A1                                | solute carrier family 44, member 1                                                  | 0.42141     | 5.99                                                                                                                                     | 7.03 | 4.35 | 5.65 | 5.97 | 7.9  | 6.32 | 8.42 | 5.16 | 5.17 |
| 223092_at    | ANKH                                   | ankylosis, progressive homolog (mouse)                                              | 0.42141     | 6.56                                                                                                                                     | 5.06 | 3.84 | 6.11 | 6.4  | 3.68 | 6.04 | 3.61 | 5.78 | 4.17 |
| 227868_at    | LOC154761                              | hypothetical LOC154761                                                              | 0.42141     | 6.69                                                                                                                                     | 5.37 | 6.94 | 7.71 | 7.2  | 5.55 | 7.97 | 5.47 | 6.81 | 4.33 |
| 1560342_at   | ---                                    | ---                                                                                 | 0.42141     | 6.41                                                                                                                                     | 3.04 | 3.98 | 4.28 | 4.72 | 4.36 | 6.26 | 3.81 | 6.46 | 4.6  |
| 243329_at    | ---                                    | ---                                                                                 | 0.42141     | 6.27                                                                                                                                     | 6.07 | 4.84 | 5.44 | 5.31 | 3.36 | 6.64 | 3.18 | 5.85 | 4.51 |
| 235324_at    | SFRS3                                  | splicing factor, arginine/serine-rich 3                                             | 0.42141     | 5.89                                                                                                                                     | 3.7  | 6.98 | 6.54 | 6.08 | 4.73 | 5.82 | 4.9  | 5.49 | 4.15 |
| 236595_at    | ---                                    | ---                                                                                 | 0.42141     | 6.05                                                                                                                                     | 4.56 | 6.47 | 5.96 | 4.46 | 4.26 | 6.05 | 4.36 | 7.16 | 5.5  |
| 213539_at    | CD3D                                   | CD3d molecule, delta (CD3-TCR complex)                                              | 0.423946    | 6.16                                                                                                                                     | 5.42 | 5.09 | 5.43 | 8.15 | 5.61 | 8.92 | 5.37 | 6.31 | 5.43 |
| 202206_at    | ARL4C                                  | ADP-ribosylation factor-like 4C                                                     | 0.423946    | 6.37                                                                                                                                     | 4.98 | 7.05 | 6.99 | 6.04 | 5.55 | 7.53 | 3.62 | 5.88 | 5.15 |
| 204890_s_at  | LCK                                    | lymphocyte-specific protein tyrosine kinase                                         | 0.423946    | 5.39                                                                                                                                     | 3.93 | 4    | 5.12 | 6.76 | 4.71 | 6.92 | 3.98 | 6.29 | 4.61 |
| 224356_x_at  | MS4A6A                                 | membrane-spanning 4-domains, subfamily A, member 6A                                 | 0.423946    | 6.61                                                                                                                                     | 7.53 | 8.72 | 8.66 | 7.58 | 9.87 | 8.78 | 9.49 | 7.3  | 8.08 |
| 235680_at    | ---                                    | ---                                                                                 | 0.423946    | 8.84                                                                                                                                     | 8.22 | 7.5  | 8.05 | 8.16 | 6.83 | 8.15 | 6.43 | 9.1  | 5.98 |
| 210116_at    | SH2D1A                                 | SH2 domain protein 1A                                                               | 0.426971    | 5.85                                                                                                                                     | 3.83 | 5.02 | 6.34 | 7.11 | 4.51 | 8.16 | 5.24 | 7.02 | 4.57 |
| 205758_at    | CD8A                                   | CD8a molecule                                                                       | 0.454482    | 6.49                                                                                                                                     | 3.99 | 4.44 | 6.08 | 5.72 | 3.98 | 8.52 | 3.37 | 5.55 | 3.55 |
| 1558691_a_at | DOCK4                                  | dedicator of cytokinesis 4                                                          | 0.454482    | 8.15                                                                                                                                     | 2.5  | 7.89 | 8.5  | 5.96 | 3.37 | 8.21 | 3.79 | 8.1  | 4.43 |
| 210426_x_at  | RORA                                   | RAR-related orphan receptor A                                                       | 0.454482    | 6.33                                                                                                                                     | 4.65 | 4.15 | 4.28 | 6.33 | 3.89 | 7.72 | 4.28 | 4.9  | 3.66 |
| 210972_x_at  | TRA@ /// TRAC /// TRAJ17<br>/// TRAV20 | T cell receptor alpha locus /// T cell receptor alpha constant ///<br>T cell recept | 0.454482    | 6.6                                                                                                                                      | 5.02 | 5.59 | 7    | 7.87 | 6.62 | 9.53 | 5.64 | 7.85 | 6.07 |
| 206804_at    | CD3G                                   | CD3g molecule, gamma (CD3-TCR complex)                                              | 0.454482    | 6.24                                                                                                                                     | 4.21 | 4.57 | 6.17 | 6.84 | 5.11 | 8.51 | 4    | 5.65 | 5.73 |
| 230464_at    | S1PR5                                  | sphingosine-1-phosphate receptor 5                                                  | 0.454482    | 6.36                                                                                                                                     | 4.57 | 5.61 | 5.48 | 7.37 | 4.44 | 7.51 | 4.78 | 7.19 | 5.32 |
| 236510_at    | ---                                    | ---                                                                                 | 0.454482    | 7.68                                                                                                                                     | 4.45 | 4.64 | 7.29 | 6.65 | 3.1  | 7.71 | 5.2  | 8.57 | 2.95 |
| 221558_s_at  | LEF1                                   | lymphoid enhancer-binding factor 1                                                  | 0.454482    | 5.08                                                                                                                                     | 3.76 | 3.65 | 6.44 | 7.43 | 4.96 | 7.73 | 3.81 | 6.61 | 5.61 |
| 212224_at    | ALDH1A1                                | aldehyde dehydrogenase 1 family, member A1                                          | 0.454482    | 4.5                                                                                                                                      | 5.74 | 4.78 | 6.5  | 6.67 | 9.1  | 6.94 | 7.18 | 5.25 | 6.94 |
| 201506_at    | TGFBI                                  | transforming growth factor, beta-induced, 68kDa                                     | 0.454482    | 5.24                                                                                                                                     | 6.61 | 5.62 | 6.54 | 7.32 | 9.5  | 7.85 | 8.92 | 6.35 | 6.7  |
| 244061_at    | ---                                    | ---                                                                                 | 0.454482    | 7.3                                                                                                                                      | 5.69 | 5    | 7.1  | 6.94 | 4.6  | 7.57 | 4    | 7.2  | 2.98 |
| 234778_at    | ---                                    | ---                                                                                 | 0.454482    | 8.7                                                                                                                                      | 6.59 | 6.49 | 7.86 | 7.43 | 3.67 | 8.79 | 5.66 | 7.81 | 5.25 |
| 226018_at    | C7orf41                                | chromosome 7 open reading frame 41                                                  | 0.454482    | 6.49                                                                                                                                     | 6.65 | 5.64 | 6.77 | 6.58 | 9.58 | 7.31 | 8.56 | 6.73 | 7.37 |
| 1569477_at   | ---                                    | ---                                                                                 | 0.454482    | 9.37                                                                                                                                     | 7.28 | 8.96 | 8.65 | 7.34 | 6.93 | 8.89 | 7.18 | 9.18 | 6.83 |
| 229483_at    | ---                                    | ---                                                                                 | 0.454482    | 6.79                                                                                                                                     | 6.07 | 4.56 | 6.34 | 5.85 | 3.43 | 5.16 | 4.64 | 6.5  | 3.52 |
| 209671_x_at  | TRA@ /// TRAC                          | T cell receptor alpha locus /// T cell receptor alpha constant                      | 0.454482    | 6.71                                                                                                                                     | 5.73 | 5.7  | 6.66 | 7.61 | 6.46 | 9.1  | 5.72 | 7.35 | 6.01 |

|              |           |                                                                                     |          |      |      |      |      |      |       |       |       |       |       |
|--------------|-----------|-------------------------------------------------------------------------------------|----------|------|------|------|------|------|-------|-------|-------|-------|-------|
| 233289_at    | ---       | ---                                                                                 | 0.454482 | 6.66 | 4.54 | 5.61 | 6.6  | 6.38 | 4.33  | 7.26  | 4.73  | 6.53  | 3.83  |
| 211902_x_at  | TRA@      | T cell receptor alpha locus                                                         | 0.454482 | 6.46 | 5.85 | 5.96 | 6.75 | 7.52 | 6.39  | 9.18  | 6.06  | 7.57  | 6.03  |
| 223527_s_at  | CDADC1    | cytidine and dCMP deaminase domain containing 1                                     | 0.454482 | 8.05 | 6.71 | 8.44 | 7.96 | 7.74 | 5.81  | 7.53  | 5.63  | 7.46  | 5.08  |
| 240344_x_at  | LYRM7     | Lym7 homolog (mouse)                                                                | 0.454482 | 7.93 | 7.47 | 7.07 | 7.14 | 8.5  | 5.84  | 8.17  | 5.26  | 7.67  | 7.9   |
| 1569077_x_at | ZNF836    | zinc finger protein 836                                                             | 0.454482 | 7.59 | 4.69 | 6.4  | 5.73 | 7.15 | 4.55  | 6.66  | 3.87  | 6.76  | 3.76  |
| 227686_at    | OXNAD1    | oxidoreductase NAD-binding domain containing 1                                      | 0.454482 | 6.79 | 5.36 | 5.71 | 6.87 | 6.92 | 4.54  | 8.57  | 6.82  | 7.95  | 6.42  |
| 232344_at    | ---       | ---                                                                                 | 0.454482 | 9.42 | 8.06 | 7.43 | 8.92 | 7.99 | 6.54  | 9.27  | 7.57  | 9.2   | 4.72  |
| 210843_s_at  | MFAP3L    | microfibrillar-associated protein 3-like                                            | 0.454482 | 5.31 | 6.13 | 5.53 | 6.39 | 5.24 | 9.07  | 6.92  | 6.85  | 4.62  | 5.56  |
| 228433_at    | NFYA      | nuclear transcription factor Y, alpha                                               | 0.454482 | 8.05 | 7.6  | 6.11 | 7.07 | 7.24 | 4.58  | 8.12  | 5.93  | 7.77  | 4.54  |
| 225187_at    | KIAA1967  | KIAA1967                                                                            | 0.454482 | 8.19 | 5.97 | 6.82 | 6.87 | 7.02 | 5.14  | 6.85  | 4.89  | 7.93  | 3.41  |
| 228211_at    | C9orf102  | chromosome 9 open reading frame 102                                                 | 0.454482 | 6.99 | 6.29 | 5.23 | 5.36 | 6.73 | 4.15  | 6.47  | 3.55  | 7.46  | 3.62  |
| 220570_at    | RETN      | resistin                                                                            | 0.454482 | 4.86 | 5.51 | 5.97 | 5.98 | 5.92 | 7.79  | 6.66  | 8.84  | 5.5   | 7.75  |
| 239829_at    | ---       | ---                                                                                 | 0.454482 | 7.43 | 5.7  | 4.29 | 5.36 | 6.64 | 3.37  | 6.66  | 4.86  | 6.12  | 4.85  |
| 200824_at    | GSTP1     | glutathione S-transferase pi 1                                                      | 0.454482 | 6.13 | 6.79 | 7.47 | 6.16 | 6.82 | 8.7   | 7.14  | 8.21  | 6.31  | 9.37  |
| 214469_at    | HIST1H2AE | histone cluster 1, H2ae                                                             | 0.454482 | 7.89 | 8.8  | 9.23 | 8.56 | 8.62 | 11.71 | 8.29  | 10.38 | 8.67  | 10.37 |
| 239571_at    | ---       | ---                                                                                 | 0.454482 | 7.82 | 6.03 | 6.53 | 6.47 | 7.52 | 5.05  | 7.42  | 4.63  | 8.08  | 7.1   |
| 218117_at    | RBX1      | ring-box 1                                                                          | 0.454482 | 6.41 | 6.83 | 6.57 | 7.05 | 6.84 | 9.96  | 7.11  | 8.02  | 7.04  | 8.97  |
| 239504_at    | ---       | ---                                                                                 | 0.454482 | 6.09 | 5.2  | 5.09 | 5.07 | 6.38 | 4.25  | 7.68  | 4.7   | 7.2   | 5.02  |
| 202944_at    | NAGA      | N-acetylgalactosaminidase, alpha-                                                   | 0.454482 | 4.94 | 6.49 | 4.31 | 5.44 | 5.92 | 7.11  | 6.87  | 8.09  | 5.95  | 6.14  |
| 231211_s_at  | YIF1B     | Yip1 interacting factor homolog B (S. cerevisiae)                                   | 0.454482 | 4.45 | 5.76 | 6.37 | 5.61 | 5.84 | 8.13  | 5.27  | 6.74  | 4.69  | 6.17  |
| 213073_at    | ZFYVE26   | zinc finger, FYVE domain containing 26                                              | 0.454482 | 6.34 | 6.37 | 6.89 | 4.9  | 6.32 | 6.69  | 7.31  | 4.68  | 7.68  | 4.86  |
| 210621_s_at  | RASA1     | RAS p21 protein activator (GTPase activating protein) 1                             | 0.454482 | 7.37 | 5.89 | 5.27 | 6.31 | 5.88 | 4.65  | 6.89  | 5.67  | 7.54  | 4.8   |
| 232354_at    | ---       | ---                                                                                 | 0.454482 | 7.28 | 4.94 | 6.16 | 6.39 | 6.11 | 5.35  | 6.57  | 4.28  | 6.68  | 4.16  |
| 200736_s_at  | GPX1      | glutathione peroxidase 1                                                            | 0.454951 | 6.72 | 7.52 | 7.01 | 8.04 | 8.17 | 10.27 | 8.29  | 8.95  | 7.93  | 8.46  |
| 229541_at    | ---       | ---                                                                                 | 0.455667 | 6.71 | 7.04 | 5.49 | 6    | 6.46 | 4.08  | 6.3   | 5.77  | 7.03  | 4.33  |
| 39248_at     | AQP3      | aquaporin 3 (Gill blood group)                                                      | 0.459351 | 8.45 | 5.03 | 3.52 | 6.46 | 10.3 | 4.88  | 11.25 | 7.07  | 8.74  | 5.82  |
| 202988_s_at  | RGS1      | regulator of G-protein signaling 1                                                  | 0.459351 | 6.66 | 5.9  | 5.72 | 6.68 | 7.95 | 6.55  | 6.55  | 5.04  | 7.77  | 4.53  |
| 236266_at    | RORA      | RAR-related orphan receptor A                                                       | 0.463297 | 5.75 | 4.63 | 4.38 | 5.94 | 6.17 | 4.25  | 6.89  | 3.45  | 6.34  | 4.1   |
| 234044_at    | ---       | ---                                                                                 | 0.463297 | 10.5 | 7.99 | 7.17 | 8.76 | 8.22 | 7.09  | 9.95  | 7.47  | 10.18 | 6.24  |
| 228097_at    | MYLIP     | myosin regulatory light chain interacting protein                                   | 0.463687 | 7.08 | 5.02 | 6.81 | 7.43 | 5.57 | 3.78  | 5.53  | 3.84  | 5.77  | 3.16  |
| 242659_at    | ---       | ---                                                                                 | 0.463687 | 7.91 | 5.73 | 7.22 | 7.75 | 6.77 | 6.84  | 7.18  | 4.79  | 7.09  | 5.01  |
| 223754_at    | C2orf88   | chromosome 2 open reading frame 88                                                  | 0.479569 | 3.9  | 3.63 | 4.69 | 5.96 | 4.58 | 9.51  | 5.46  | 6.98  | 5.08  | 6.43  |
| 210254_at    | MS4A3     | membrane-spanning 4-domains, subfamily A, member 3<br>(hematopoietic cell-specific) | 0.479569 | 7.11 | 8.4  | 6.17 | 7.86 | 9.14 | 10.25 | 9.24  | 11.74 | 8.13  | 10.97 |
| 208078_s_at  | SIK1      | salt-inducible kinase 1                                                             | 0.479569 | 9.8  | 5.92 | 9.22 | 9.49 | 7.86 | 5.38  | 8.83  | 5.34  | 8.8   | 6.24  |
| 230550_at    | MS4A6A    | membrane-spanning 4-domains, subfamily A, member 6A                                 | 0.479569 | 6.13 | 6.59 | 6.24 | 7.09 | 6.69 | 9.46  | 8.07  | 7.84  | 6.81  | 8.2   |
| 203645_s_at  | CD163     | CD163 molecule                                                                      | 0.479569 | 5.18 | 7.1  | 5.22 | 6.26 | 7.14 | 7.93  | 8.23  | 7.84  | 5.44  | 6.51  |
| 1554615_at   | ---       | ---                                                                                 | 0.479569 | 7.75 | 6.61 | 5.33 | 5.77 | 5.89 | 3.04  | 6.02  | 4.61  | 7.11  | 4.63  |
| 244423_at    | ---       | ---                                                                                 | 0.479569 | 8.32 | 6.75 | 7.08 | 7.7  | 7.51 | 6.25  | 8.98  | 5.82  | 8.72  | 5.65  |
| 232356_at    | ---       | ---                                                                                 | 0.479569 | 8.15 | 4.81 | 6.45 | 5.59 | 5.04 | 6.26  | 5.74  | 6.23  | 7.6   | 3.77  |
| 1557551_at   | ---       | ---                                                                                 | 0.479569 | 6.53 | 5.14 | 4.89 | 5.69 | 6.74 | 6.95  | 6.52  | 3.64  | 6.57  | 5.59  |
| 232789_at    | ---       | ---                                                                                 | 0.479569 | 7.18 | 5.29 | 7.16 | 7.42 | 5.99 | 5.04  | 6.45  | 3.84  | 7.06  | 3.52  |
| 1556735_at   | ---       | ---                                                                                 | 0.479569 | 6.25 | 4.31 | 5.38 | 6.7  | 6.49 | 3.64  | 7.3   | 4.66  | 5.24  | 4.3   |

|              |                 |                                                                                  |          |       |      |       |       |      |       |       |      |       |       |
|--------------|-----------------|----------------------------------------------------------------------------------|----------|-------|------|-------|-------|------|-------|-------|------|-------|-------|
| 213653_at    | METTL3          | methyltransferase like 3                                                         | 0.479569 | 7.96  | 7.44 | 6.37  | 7.26  | 8.02 | 6.46  | 7.91  | 4.99 | 8.32  | 6.58  |
| 238243_at    | ---             | ---                                                                              | 0.479569 | 7.7   | 5.25 | 6.02  | 7.59  | 6.07 | 4.45  | 7.09  | 6    | 6.94  | 4.96  |
| 240721_at    | ---             | ---                                                                              | 0.481145 | 9.23  | 6.35 | 3.71  | 7.96  | 6.49 | 4.2   | 8.47  | 4.24 | 7.15  | 3.3   |
| 205653_at    | CTSG            | cathepsin G                                                                      | 0.481145 | 4.91  | 6.84 | 5.74  | 5.1   | 6.48 | 8.37  | 6.58  | 10.9 | 5.57  | 10.73 |
| 1554892_a_at | MS4A3           | membrane-spanning 4-domains, subfamily A, member 3 (hematopoietic cell-specific) | 0.481145 | 2.68  | 4.52 | 4.53  | 3.74  | 4.84 | 7.35  | 5.36  | 8.37 | 4.51  | 6.08  |
| 210031_at    | CD247           | CD247 molecule                                                                   | 0.481145 | 5.8   | 4.6  | 5.25  | 6.25  | 6.95 | 4.97  | 8.22  | 4.87 | 7.14  | 5.76  |
| 212289_at    | ANKRD12         | ankyrin repeat domain 12                                                         | 0.481145 | 9.62  | 9.71 | 8.88  | 9.3   | 9.07 | 5.04  | 9.56  | 6.03 | 8.72  | 7.41  |
| 204838_s_at  | MLH3            | mutL homolog 3 (E. coli)                                                         | 0.481145 | 5.01  | 4.14 | 5.75  | 6.99  | 5.95 | 10.3  | 6.74  | 7.76 | 5.36  | 7.26  |
| 234033_at    | ---             | ---                                                                              | 0.481145 | 6.61  | 2.88 | 3.53  | 5.34  | 4.33 | 4.43  | 6.54  | 3.15 | 7.44  | 4.47  |
| 242320_at    | ---             | ---                                                                              | 0.481145 | 8.95  | 7.12 | 7.65  | 8.54  | 7.34 | 7.96  | 9.38  | 6.08 | 9.73  | 6.65  |
| 215049_x_at  | CD163           | CD163 molecule                                                                   | 0.481145 | 5.73  | 7.17 | 4.45  | 5.94  | 7.22 | 7.83  | 8.28  | 7.72 | 5.25  | 6.72  |
| 230048_at    | ---             | ---                                                                              | 0.481145 | 10.01 | 8.65 | 8.2   | 9.03  | 9.1  | 6.77  | 9.92  | 7.6  | 8.98  | 6.77  |
| 239152_at    | ---             | ---                                                                              | 0.481145 | 11.15 | 8.31 | 9.81  | 10.45 | 9.85 | 6.84  | 10.89 | 8.16 | 10.75 | 6.91  |
| 235739_at    | ---             | ---                                                                              | 0.481145 | 8.53  | 5.01 | 8.51  | 5.36  | 7.4  | 4.97  | 7.58  | 7.82 | 8.81  | 3.97  |
| 202207_at    | ARL4C           | ADP-ribosylation factor-like 4C                                                  | 0.481145 | 6.24  | 5.61 | 5.58  | 7.08  | 6.61 | 5.99  | 7.72  | 4.16 | 6.69  | 4.45  |
| 242898_at    | EIF2AK2         | eukaryotic translation initiation factor 2-alpha kinase 2                        | 0.481145 | 6.93  | 7.4  | 6.44  | 8.11  | 7.17 | 5.03  | 7.01  | 5.69 | 7.83  | 4.83  |
| 205557_at    | BPI             | bactericidal/permeability-increasing protein                                     | 0.481145 | 5.09  | 6.09 | 6.02  | 6.3   | 6.85 | 8.54  | 7.02  | 9.09 | 5.5   | 8.1   |
| 244840_x_at  | DOCK4           | dedicator of cytokinesis 4                                                       | 0.481145 | 6.89  | 4.7  | 7.37  | 7.18  | 4.86 | 5.09  | 6.42  | 4.24 | 6.33  | 6.09  |
| 208553_at    | HIST1H1E        | histone cluster 1, H1e                                                           | 0.481145 | 7.25  | 9.17 | 7.31  | 7.07  | 8.33 | 10.79 | 7.92  | 9.82 | 7.67  | 10.38 |
| 233647_s_at  | CDADC1          | cytidine and dCMP deaminase domain containing 1                                  | 0.481145 | 8.24  | 7.07 | 7.82  | 8.63  | 7.31 | 5.8   | 8.17  | 5.33 | 8.38  | 6.03  |
| 234196_at    | ---             | ---                                                                              | 0.481145 | 8.94  | 6.21 | 6.23  | 7.89  | 7.89 | 5.27  | 8.42  | 6.08 | 8.03  | 5.39  |
| 224598_at    | MGAT4B          | mannosyl (alpha-1,3-)-glycoprotein beta-1,4-N-acetylglucosaminyltransferase, iso | 0.481145 | 5.12  | 6.07 | 2.94  | 6.23  | 5.09 | 7.54  | 5.37  | 5.92 | 5.49  | 6.45  |
| 209772_s_at  | CD24            | CD24 molecule                                                                    | 0.481145 | 5.08  | 6.27 | 6.63  | 5.4   | 6.55 | 7.12  | 6.23  | 8.89 | 5.98  | 9.46  |
| 239045_at    | ---             | ---                                                                              | 0.481145 | 9.46  | 7.68 | 9.9   | 8.69  | 8.84 | 6.25  | 9.62  | 8.27 | 9.39  | 6.1   |
| 1563259_at   | ---             | ---                                                                              | 0.481145 | 7.47  | 5.4  | 5.25  | 7.23  | 6.54 | 4.05  | 7.26  | 4.53 | 6.52  | 4.71  |
| 243182_at    | ---             | ---                                                                              | 0.481145 | 8.14  | 7.18 | 6.89  | 8.45  | 6.89 | 4.86  | 7.09  | 6.32 | 8     | 5.52  |
| 205967_at    | HIST1H4C        | histone cluster 1, H4c                                                           | 0.481145 | 7.27  | 8.54 | 7.59  | 7.42  | 8    | 10.3  | 7.96  | 9.81 | 8.13  | 10.13 |
| 232478_at    | ---             | ---                                                                              | 0.481145 | 6.21  | 5.75 | 7.57  | 5.65  | 4.27 | 4.83  | 6.37  | 4.55 | 6.44  | 4.73  |
| 1568640_at   | ASPRV1          | Aspartic peptidase, retroviral-like 1                                            | 0.481145 | 7.06  | 5.2  | 4.84  | 5.52  | 5.32 | 4.67  | 6.45  | 4.58 | 7.49  | 4.87  |
| 235102_x_at  | ---             | ---                                                                              | 0.482511 | 5.27  | 6.63 | 7.75  | 8.12  | 6.32 | 10.83 | 7.94  | 9.48 | 7.94  | 8.41  |
| 243857_at    | MORF4L2         | Mortality factor 4 like 2                                                        | 0.483408 | 6.63  | 3.55 | 5.7   | 4.73  | 4.3  | 2.85  | 5.54  | 6.01 | 6.29  | 2.69  |
| 214771_x_at  | MPRIP           | myosin phosphatase Rho interacting protein                                       | 0.489841 | 6.53  | 7.35 | 5.36  | 6.55  | 7.96 | 4.49  | 7.16  | 4.65 | 6.86  | 5.59  |
| 206488_s_at  | CD36            | CD36 molecule (thrombospondin receptor)                                          | 0.490832 | 4.29  | 6.26 | 5.4   | 6.65  | 7.24 | 9.86  | 9.18  | 9.38 | 7.46  | 7.46  |
| 202768_at    | FOSB            | FBJ murine osteosarcoma viral oncogene homolog B                                 | 0.490832 | 11.92 | 5.8  | 11.93 | 11.74 | 8.86 | 7.65  | 11.85 | 8.67 | 11.57 | 7.93  |
| 239453_at    | ---             | ---                                                                              | 0.490832 | 7.13  | 7.43 | 5.06  | 7.32  | 6.82 | 3.96  | 7.31  | 5.02 | 7.69  | 5.61  |
| 206655_s_at  | GP1BB /// SEPT5 | glycoprotein Ib (platelet), beta polypeptide /// septin 5                        | 0.490832 | 5.77  | 5.51 | 6.01  | 6.49  | 6.75 | 10.24 | 6.99  | 8.4  | 6.17  | 8.25  |
| 213294_at    | EIF2AK2         | eukaryotic translation initiation factor 2-alpha kinase 2                        | 0.490832 | 6.29  | 6.56 | 4.67  | 6.89  | 6.87 | 3.71  | 6.54  | 5.61 | 6.97  | 4.91  |
| 1557799_at   | C11orf31        | chromosome 11 open reading frame 31                                              | 0.490832 | 6.45  | 7.16 | 7.12  | 6.2   | 6.74 | 5.65  | 5.77  | 3.41 | 6.57  | 6.76  |
| 222326_at    | ---             | ---                                                                              | 0.490832 | 8.86  | 6.97 | 8.65  | 9.24  | 8.11 | 5.67  | 8.92  | 6.73 | 9.02  | 6     |
| 231292_at    | EID3            | EP300 interacting inhibitor of differentiation 3                                 | 0.490832 | 6.69  | 3.93 | 6.58  | 6.02  | 4.18 | 4.24  | 4.86  | 4.29 | 5.72  | 4.05  |

|             |         |                                                                                  |          |       |       |       |       |       |       |       |       |       |       |
|-------------|---------|----------------------------------------------------------------------------------|----------|-------|-------|-------|-------|-------|-------|-------|-------|-------|-------|
| 221618_s_at | TAF9B   | TAF9B RNA polymerase II, TATA box binding protein (TBP)-associated factor, 31kDa | 0.490832 | 8.83  | 8.03  | 7.42  | 8.93  | 8.79  | 6.24  | 9.41  | 7.54  | 9.49  | 8.3   |
| 200602_at   | APP     | amyloid beta (A4) precursor protein                                              | 0.491013 | 5.47  | 7.17  | 4.66  | 7.16  | 6.99  | 10.06 | 8.16  | 9.02  | 5.67  | 7     |
| 219872_at   | C4orf18 | chromosome 4 open reading frame 18                                               | 0.491013 | 3.74  | 5.33  | 3.82  | 4.06  | 6     | 6.94  | 6.56  | 6.87  | 4.55  | 3.96  |
| 217591_at   | SKIL    | SKI-like oncogene                                                                | 0.491013 | 10.19 | 5.43  | 10.39 | 9.69  | 7.37  | 7.35  | 8.12  | 6.38  | 9.01  | 6.79  |
| 216550_x_at | ANKRD12 | ankyrin repeat domain 12                                                         | 0.491013 | 10.27 | 10.18 | 7.14  | 9.72  | 10.17 | 7.61  | 10.37 | 8.16  | 10.38 | 7.76  |
| 208601_s_at | TUBB1   | tubulin, beta 1                                                                  | 0.491013 | 4.96  | 5.68  | 6.12  | 6.53  | 6.12  | 9.52  | 7.86  | 8.54  | 6.57  | 8.22  |
| 219099_at   | C12orf5 | chromosome 12 open reading frame 5                                               | 0.491013 | 6.35  | 5.77  | 3.52  | 5.8   | 5.7   | 6.6   | 4.48  | 4.92  | 5.57  | 7     |
| 233694_at   | HSPA1L  | Heat shock 70kDa protein 1-like                                                  | 0.491819 | 4.75  | 7.35  | 5.43  | 5.94  | 5.69  | 7.14  | 4.63  | 5.56  | 5.06  | 8.47  |
| 219321_at   | MPP5    | membrane protein, palmitoylated 5 (MAGUK p55 subfamily member 5)                 | 0.492997 | 7.97  | 7.07  | 4.51  | 6.3   | 6.56  | 5.1   | 7.16  | 3.54  | 7.64  | 5.19  |
| 207269_at   | DEFA4   | defensin, alpha 4, corticostatin                                                 | 0.493509 | 4.21  | 6.54  | 7.29  | 6.02  | 7.32  | 9.74  | 7.68  | 10.87 | 6.86  | 11.54 |
| 210321_at   | GZMH    | granzyme H (cathepsin G-like 2, protein h-CCPX)                                  | 0.493509 | 6.4   | 5.15  | 5.7   | 6.74  | 6.61  | 5.28  | 8.89  | 5.23  | 6.32  | 5.15  |
| 203949_at   | MPO     | myeloperoxidase                                                                  | 0.493509 | 5.01  | 6.7   | 5.77  | 6.26  | 5.45  | 7.52  | 7.22  | 9.94  | 6.39  | 10.16 |
| 215889_at   | SKIL    | SKI-like oncogene                                                                | 0.493509 | 10.18 | 5.48  | 10.28 | 10.32 | 7.99  | 6.37  | 9.52  | 7.6   | 9.33  | 7.66  |
| 241020_at   | ---     | ---                                                                              | 0.493509 | 7.38  | 4.55  | 3.89  | 6.1   | 5.41  | 4.05  | 6.84  | 3.77  | 5.74  | 5.49  |
| 201163_s_at | IGFBP7  | insulin-like growth factor binding protein 7                                     | 0.493509 | 5.79  | 5.46  | 5.05  | 5.89  | 6.99  | 7.45  | 5.74  | 7.81  | 6.7   | 9.96  |
| 204081_at   | NRGN    | neurogranin (protein kinase C substrate, RC3)                                    | 0.493509 | 5.75  | 5.05  | 5.51  | 6.01  | 6.54  | 9.78  | 7.36  | 8.59  | 6.15  | 7.08  |
| 208690_s_at | PDLIM1  | PDZ and LIM domain 1                                                             | 0.493509 | 5.01  | 5.94  | 6.11  | 6.16  | 7.38  | 8.67  | 6.72  | 8.98  | 6.7   | 7.63  |
| 207808_s_at | PROS1   | protein S (alpha)                                                                | 0.493509 | 4.72  | 4.7   | 5.06  | 5.08  | 5.93  | 7.81  | 6.19  | 7.27  | 4.51  | 5.17  |
| 209189_at   | FOS     | v-fos FBJ murine osteosarcoma viral oncogene homolog                             | 0.493509 | 12    | 10.31 | 10.77 | 10.59 | 11.3  | 9.23  | 12.17 | 11.76 | 12.02 | 8.8   |
| 243842_at   | ---     | ---                                                                              | 0.493509 | 7.86  | 4.44  | 4.55  | 6.36  | 5.95  | 4.36  | 5.5   | 5.18  | 6.13  | 5.59  |
| 230740_at   | ---     | ---                                                                              | 0.493509 | 4.77  | 5.54  | 7.48  | 6.59  | 4.52  | 8.1   | 6.43  | 7.73  | 5.9   | 6.81  |
| 239163_at   | UBE2B   | ubiquitin-conjugating enzyme E2B (RAD6 homolog)                                  | 0.493509 | 9.85  | 7.19  | 7.73  | 9.22  | 8.58  | 8.34  | 9.43  | 6.64  | 9.72  | 7.5   |
| 211842_s_at | SLC24A1 | solute carrier family 24 (sodium/potassium/calcium exchanger), member 1          | 0.496258 | 6.08  | 3.89  | 4.29  | 4.31  | 5.29  | 4.08  | 6.96  | 3.57  | 6.9   | 4.4   |
| 202436_s_at | CYP1B1  | cytochrome P450, family 1, subfamily B, polypeptide 1                            | 0.496258 | 4.5   | 7.28  | 7.72  | 6.89  | 6.82  | 9.26  | 8.23  | 8.54  | 7.3   | 7.38  |
| 234326_at   | ---     | ---                                                                              | 0.496258 | 9     | 6.98  | 7.78  | 8.71  | 7.11  | 5.77  | 8.09  | 7     | 7.82  | 4.43  |
| 235500_at   | HNRNPC  | heterogeneous nuclear ribonucleoprotein C (C1/C2)                                | 0.496258 | 8.02  | 4.79  | 7.01  | 7.12  | 5.07  | 5.29  | 6.99  | 4.03  | 6.51  | 4.28  |
| 214923_at   | ATP6V1D | ATPase, H+ transporting, lysosomal 34kDa, V1 subunit D                           | 0.496258 | 7.91  | 6.51  | 4.76  | 6.64  | 7.75  | 5.14  | 8.81  | 6.08  | 6.71  | 4.5   |
| 210244_at   | CAMP    | cathelicidin antimicrobial peptide                                               | 0.496258 | 7.84  | 8.48  | 8.62  | 8.54  | 9.17  | 10.54 | 9.24  | 11.23 | 8.08  | 10.41 |
| 1558877_at  | ---     | ---                                                                              | 0.496258 | 7.34  | 6.05  | 5.44  | 6.99  | 5.49  | 3.68  | 6.05  | 4.39  | 7.04  | 4.65  |
| 201058_s_at | MYL9    | myosin, light chain 9, regulatory                                                | 0.496258 | 7.22  | 5.66  | 6.18  | 7.09  | 6.11  | 10.59 | 8.52  | 9.29  | 6.81  | 8.54  |
| 201105_at   | LGALS1  | lectin, galactoside-binding, soluble, 1                                          | 0.496258 | 5.98  | 6.34  | 6.98  | 7.18  | 6.84  | 9.22  | 8.1   | 8.77  | 6.53  | 7.22  |
| 1557519_at  | ---     | ---                                                                              | 0.496258 | 7.99  | 5.67  | 7.34  | 8.41  | 6.23  | 5.25  | 7.25  | 6.99  | 7.29  | 7.84  |
| 232174_at   | ---     | ---                                                                              | 0.496258 | 6.95  | 4.55  | 6.38  | 5.36  | 5.3   | 4.25  | 7.86  | 6.51  | 6.04  | 4.16  |
| 222122_s_at | THOC2   | THO complex 2                                                                    | 0.496258 | 6.99  | 6.92  | 4.48  | 5.58  | 7.22  | 5.8   | 7.19  | 4.97  | 7.22  | 4.4   |
| 201004_at   | SSR4    | signal sequence receptor, delta (translocon-associated protein delta)            | 0.496258 | 6.67  | 6.67  | 7.03  | 6.79  | 6.99  | 9.34  | 7.69  | 8.54  | 6.37  | 8.49  |
| 233097_x_at | ---     | ---                                                                              | 0.496258 | 6.51  | 4.35  | 4.82  | 5.13  | 6.12  | 4.92  | 6.47  | 3.62  | 5.09  | 3.7   |
| 240013_at   | ---     | ---                                                                              | 0.498419 | 7.54  | 6.34  | 6.41  | 6.48  | 6.25  | 2.77  | 7.69  | 5.51  | 6.1   | 7.3   |

|              |                       |                                                              |          |       |       |       |       |       |       |       |       |       |       |  |
|--------------|-----------------------|--------------------------------------------------------------|----------|-------|-------|-------|-------|-------|-------|-------|-------|-------|-------|--|
|              | NBPF10 /// NBPF11 /// | neuroblastoma breakpoint family, member 10 ///               |          |       |       |       |       |       |       |       |       |       |       |  |
| 229447_x_at  | NBPF8 /// RP11-94I2.2 | neuroblastoma breakpoint family,                             | 0.498419 | 8.36  | 8.53  | 6.64  | 7.54  | 7.87  | 6.16  | 8.52  | 6.75  | 8.85  | 5.87  |  |
| 235716_at    | ---                   | ---                                                          | 0.498419 | 8.15  | 6.69  | 5.39  | 6.59  | 7.57  | 5.33  | 7.53  | 4.64  | 6.68  | 7.38  |  |
| 202241_at    | TRIB1                 | tribbles homolog 1 (Drosophila)                              | 0.498419 | 11.17 | 9.4   | 11.41 | 11.42 | 11.09 | 9.56  | 11.12 | 9.14  | 11.48 | 8.86  |  |
| 232001_at    | LOC439949             | hypothetical protein LOC439949                               | 0.498769 | 3.85  | 3.33  | 3.33  | 4.91  | 6.63  | 4.3   | 8.56  | 3.36  | 6.35  | 4.56  |  |
| 213193_x_at  | TRBC1                 | T cell receptor beta constant 1                              | 0.498769 | 7.53  | 5.95  | 2.99  | 6.86  | 8.48  | 5.42  | 9.89  | 5.46  | 7.43  | 5.16  |  |
| 217414_x_at  | HBA1 /// HBA2         | hemoglobin, alpha 1 /// hemoglobin, alpha 2                  | 0.498769 | 9.52  | 10.39 | 5.04  | 10.56 | 10.2  | 12.36 | 8.91  | 11.46 | 6.37  | 9.75  |  |
| 204018_x_at  | HBA1 /// HBA2         | hemoglobin, alpha 1 /// hemoglobin, alpha 2                  | 0.498769 | 9.68  | 10.56 | 5.56  | 10.66 | 10.25 | 12.44 | 8.95  | 11.37 | 6.52  | 9.82  |  |
| 211745_x_at  | HBA1 /// HBA2         | hemoglobin, alpha 1 /// hemoglobin, alpha 2                  | 0.498769 | 10.05 | 10.96 | 5.7   | 10.96 | 10.67 | 12.72 | 9.32  | 11.73 | 7.03  | 10.31 |  |
| 204620_s_at  | VCAN                  | versican                                                     | 0.498769 | 3.85  | 6.22  | 3.74  | 7.24  | 5.7   | 9.08  | 8.31  | 7.7   | 5.82  | 4.15  |  |
| 202437_s_at  | CYP1B1                | cytochrome P450, family 1, subfamily B, polypeptide 1        | 0.498769 | 4.19  | 4.66  | 3.97  | 4.88  | 5.25  | 7.27  | 6.66  | 7.43  | 5.36  | 4.95  |  |
| 212402_at    | ZC3H13                | zinc finger CCCH-type containing 13                          | 0.498769 | 7.84  | 7.18  | 4.84  | 7.02  | 7.53  | 3.88  | 7.21  | 6.86  | 7.42  | 3.75  |  |
| 1556783_a_at | ---                   | ---                                                          | 0.498769 | 6.63  | 4.98  | 6.23  | 6.33  | 5.6   | 3.14  | 6.12  | 4.08  | 6.25  | 2.58  |  |
| 1555680_a_at | SMOX                  | spermine oxidase                                             | 0.498769 | 5.14  | 5.38  | 4.5   | 5.79  | 4.9   | 9.01  | 5.38  | 6.9   | 4.98  | 6.98  |  |
| 1554036_at   | ZBTB24                | zinc finger and BTB domain containing 24                     | 0.498769 | 7.21  | 6.42  | 7.03  | 6.29  | 7.61  | 5.92  | 8.56  | 4.52  | 8.74  | 4.48  |  |
| 227432_s_at  | ---                   | ---                                                          | 0.498769 | 6.4   | 5.35  | 4.6   | 6.13  | 6.13  | 7.63  | 6.65  | 6.76  | 7.79  | 8.93  |  |
| 214516_at    | HIST1H4B              | histone cluster 1, H4b                                       | 0.498769 | 6.46  | 8.15  | 6.31  | 5.52  | 5.66  | 8.98  | 8.06  | 9.48  | 7.34  | 9.39  |  |
| 208791_at    | CLU                   | clusterin                                                    | 0.498769 | 5.03  | 5.28  | 5.22  | 5.96  | 6.35  | 9.49  | 7.46  | 7.65  | 5.64  | 7.05  |  |
| 208576_s_at  | HIST1H3B              | histone cluster 1, H3b                                       | 0.498769 | 4.66  | 4.52  | 5.38  | 4.36  | 4.64  | 7.03  | 4.86  | 7.93  | 4.54  | 7.15  |  |
|              | NBPF10 /// NBPF11 /// |                                                              |          |       |       |       |       |       |       |       |       |       |       |  |
|              | NBPF12 /// NBPF14 /// |                                                              |          |       |       |       |       |       |       |       |       |       |       |  |
|              | NBPF15 /// NBPF16 /// | neuroblastoma breakpoint family, member 10 ///               |          |       |       |       |       |       |       |       |       |       |       |  |
| 201104_x_at  | NBPF8 /// RP11-94I2.2 | neuroblastoma breakpoint family,                             | 0.498769 | 8.65  | 8.03  | 6.8   | 7.57  | 7.14  | 5.79  | 8.01  | 5.49  | 7.82  | 5.98  |  |
|              | NBPF10 /// NBPF12 /// |                                                              |          |       |       |       |       |       |       |       |       |       |       |  |
|              | NBPF15 /// NBPF16 /// | neuroblastoma breakpoint family, member 10 ///               |          |       |       |       |       |       |       |       |       |       |       |  |
| 213612_x_at  | NBPF8 /// NBPF9       | neuroblastoma breakpoint family,                             | 0.498769 | 10.05 | 10.17 | 8.13  | 9     | 9.48  | 8.05  | 10.08 | 8.07  | 10.63 | 7.81  |  |
| 215378_at    | ---                   | ---                                                          | 0.498769 | 7.61  | 6.09  | 6.49  | 8.32  | 7.47  | 6.04  | 7.37  | 7.57  | 8.09  | 4.19  |  |
| 216563_at    | ANKRD12               | Ankyrin repeat domain 12                                     | 0.498769 | 11.83 | 11.65 | 8.92  | 11.01 | 11.34 | 9.59  | 11.39 | 9.8   | 11.42 | 8.98  |  |
| 215096_s_at  | ESD                   | esterase D/formylglutathione hydrolase                       | 0.498769 | 5.81  | 6.69  | 5.93  | 6.73  | 6.71  | 8.76  | 7.64  | 8.81  | 6.86  | 7.76  |  |
|              |                       | similar to Nonsecretory ribonuclease precursor (Ribonuclease |          |       |       |       |       |       |       |       |       |       |       |  |
| 216667_at    | LOC643332 /// RNASE2  | US) (Eosinophil-der                                          | 0.498769 | 5.37  | 5.15  | 5.19  | 5.13  | 5.28  | 6.75  | 5.24  | 8.79  | 5.07  | 6.62  |  |
| 218986_s_at  | DDX60                 | DEAD (Asp-Glu-Ala-Asp) box polypeptide 60                    | 0.499128 | 5.37  | 5.42  | 6.3   | 6.97  | 6.91  | 3.91  | 6.26  | 5.63  | 7.01  | 4.06  |  |
| 209458_x_at  | HBA1 /// HBA2         | hemoglobin, alpha 1 /// hemoglobin, alpha 2                  | 0.499469 | 9.94  | 10.84 | 5.46  | 10.95 | 10.56 | 12.65 | 9.25  | 11.64 | 6.45  | 10.17 |  |
| 206390_x_at  | PF4                   | platelet factor 4                                            | 0.500361 | 6     | 6.86  | 9.01  | 8.32  | 7.97  | 12.27 | 9.38  | 10.46 | 8.43  | 10.46 |  |
| 1564052_at   | TREML4                | triggering receptor expressed on myeloid cells-like 4        | 0.500788 | 9.47  | 7.35  | 7.7   | 8.92  | 6.34  | 5.47  | 8.58  | 6.22  | 9.38  | 5.87  |  |
|              |                       | myeloid/lymphoid or mixed-lineage leukemia (trithorax        |          |       |       |       |       |       |       |       |       |       |       |  |
| 224685_at    | MLLT4                 | homolog, Drosophila); tran                                   | 0.501109 | 6.52  | 5.51  | 4.11  | 5.13  | 6.45  | 4.25  | 6.97  | 5.57  | 7.35  | 4.5   |  |
| 1557071_s_at | NUB1                  | negative regulator of ubiquitin-like proteins 1              | 0.50163  | 6.32  | 6.81  | 5.43  | 6.56  | 6.17  | 4.97  | 7.24  | 6.18  | 7.51  | 3.94  |  |
| 211699_x_at  | HBA1 /// HBA2         | hemoglobin, alpha 1 /// hemoglobin, alpha 2                  | 0.502371 | 9.63  | 10.48 | 5.09  | 10.64 | 10.27 | 12.36 | 8.9   | 11.39 | 6.13  | 9.73  |  |
|              |                       |                                                              |          |       |       |       |       |       |       |       |       |       |       |  |
| 201731_s_at  | TPR                   | translocated promoter region (to activated MET oncogene)     | 0.502577 | 9.8   | 9.77  | 7.12  | 9.07  | 9.44  | 7.03  | 9.11  | 7.29  | 9.27  | 5.58  |  |
| 219208_at    | FBXO11                | F-box protein 11                                             | 0.502577 | 6.5   | 3.51  | 6.75  | 6.42  | 6.29  | 5.28  | 6.47  | 5.5   | 6.48  | 3.91  |  |
| 239494_at    | ---                   | ---                                                          | 0.504777 | 8.54  | 6.63  | 7.05  | 7.8   | 7.66  | 5.61  | 8.28  | 7.33  | 8.2   | 5.09  |  |
| 203485_at    | RTN1                  | reticulon 1                                                  | 0.504785 | 6.88  | 7.12  | 3.53  | 7.44  | 8.13  | 8.21  | 7.31  | 8.13  | 8.39  | 7.79  |  |

|             |              |                                                                                                                             |          |       |      |      |       |       |       |       |       |       |      |
|-------------|--------------|-----------------------------------------------------------------------------------------------------------------------------|----------|-------|------|------|-------|-------|-------|-------|-------|-------|------|
| 232125_at   | ---          | ---                                                                                                                         | 0.504785 | 6.12  | 4.92 | 3.6  | 5.42  | 6.08  | 5.91  | 5.71  | 4.13  | 6.8   | 3.36 |
| 210985_s_at | SP100        | SP100 nuclear antigen                                                                                                       | 0.504839 | 8.49  | 8.29 | 4.46 | 8.11  | 8.46  | 5.33  | 7.68  | 5.81  | 8.18  | 6.49 |
| 1559507_at  | LOC100130357 | similar to hCG2038897                                                                                                       | 0.504839 | 6.97  | 5.4  | 7.33 | 7.47  | 7.41  | 4.17  | 7.44  | 4.93  | 6.74  | 4.72 |
| 231644_at   | ---          | ---                                                                                                                         | 0.504839 | 7.26  | 4.32 | 8.26 | 6.14  | 6.93  | 6.91  | 8.15  | 4.78  | 8.24  | 5.55 |
| 213982_s_at | RABGAP1L     | RAB GTPase activating protein 1-like                                                                                        | 0.504839 | 6.65  | 7.55 | 6.6  | 8.15  | 6.99  | 9.18  | 8.47  | 9.82  | 7.57  | 8.02 |
| 238659_at   | KIAA0141     | KIAA0141                                                                                                                    | 0.504839 | 7.77  | 6.84 | 7.35 | 6.74  | 7.03  | 4.17  | 7.77  | 6.37  | 8.71  | 6.33 |
| 227152_at   | C12orf35     | chromosome 12 open reading frame 35                                                                                         | 0.505086 | 11.88 | 11.8 | 9.86 | 11.83 | 11.67 | 9.76  | 11.76 | 10.59 | 11.85 | 8.61 |
| 244415_at   | ---          | ---                                                                                                                         | 0.505103 | 8.22  | 7.15 | 5.93 | 7.9   | 6.57  | 3.85  | 7.15  | 6.71  | 7.9   | 4.85 |
| 219691_at   | SAMD9        | sterile alpha motif domain containing 9                                                                                     | 0.505103 | 7.87  | 7.5  | 6.76 | 8.16  | 7.15  | 5.36  | 7.48  | 6.74  | 7.03  | 5.06 |
| 219505_at   | CECR1        | cat eye syndrome chromosome region, candidate 1                                                                             | 0.506451 | 6.38  | 6.74 | 6.67 | 7.28  | 7.07  | 10.37 | 8.43  | 9.47  | 7.89  | 7.09 |
| 210915_x_at | TRBC1        | T cell receptor beta constant 1                                                                                             | 0.50749  | 7.63  | 6.23 | 3.44 | 6.88  | 8.5   | 6.3   | 9.78  | 6.12  | 7.53  | 6.02 |
| 211734_s_at | FCER1A       | Fc fragment of IgE, high affinity I, receptor for; alpha polypeptide                                                        | 0.50749  | 5.13  | 6.82 | 4.48 | 6.29  | 6.56  | 6.56  | 6.56  | 6.94  | 5.01  | 4.26 |
| 1568845_at  | ---          | ---                                                                                                                         | 0.50749  | 8     | 5.86 | 4.99 | 5.36  | 6.39  | 6.64  | 7.27  | 3.49  | 6.75  | 5.67 |
| 244578_at   | LCP2         | lymphocyte cytosolic protein 2 (SH2 domain containing leukocyte protein of 76kDa)                                           | 0.50749  | 7.55  | 4.94 | 4.76 | 7.75  | 7.58  | 5.36  | 6.19  | 4.68  | 7.1   | 5.71 |
| 203715_at   | TBCE         | tubulin folding cofactor E                                                                                                  | 0.508414 | 4.67  | 8.3  | 6.29 | 7.22  | 7.03  | 5.2   | 3.95  | 7.29  | 6     | 6.87 |
| 223725_at   | C3orf42      | chromosome 3 open reading frame 42                                                                                          | 0.508414 | 7.44  | 8.73 | 7.34 | 7.33  | 6.71  | 5.7   | 7.38  | 5.93  | 8.83  | 6.97 |
| 232784_at   | ---          | ---                                                                                                                         | 0.508414 | 6.76  | 4.32 | 7.71 | 4.47  | 5.21  | 4.08  | 7.44  | 5.78  | 7.17  | 4.14 |
| 239886_at   | ---          | ---                                                                                                                         | 0.508414 | 9.67  | 8.85 | 6.56 | 8.42  | 8.6   | 6.19  | 8.71  | 5.08  | 9.45  | 7.71 |
| 201416_at   | SOX4         | SRY (sex determining region Y)-box 4                                                                                        | 0.508414 | 3.97  | 5.61 | 4.33 | 5.15  | 5.41  | 7.03  | 5.91  | 7.59  | 4.8   | 8.23 |
| 235060_at   | LOC100190986 | hypothetical LOC100190986                                                                                                   | 0.508414 | 7.66  | 7.51 | 5.9  | 6.43  | 6.39  | 5.5   | 7.02  | 5.24  | 7.24  | 4.2  |
| 1556055_at  | ---          | ---                                                                                                                         | 0.510348 | 8.45  | 8.36 | 5.38 | 7.92  | 6.86  | 4.34  | 8.2   | 7.2   | 8.39  | 4.4  |
| 225579_at   | PQLC3        | PQ loop repeat containing 3                                                                                                 | 0.510348 | 5.63  | 6.32 | 3.44 | 5.67  | 7.4   | 8.45  | 6.98  | 7.11  | 6.62  | 7.05 |
| 239245_at   | ---          | ---                                                                                                                         | 0.510348 | 6.68  | 5.36 | 4.1  | 6.74  | 5.19  | 3.31  | 6.63  | 4.88  | 6.43  | 5.47 |
| 223111_x_at | ARID4B       | AT rich interactive domain 4B (RBP1-like)                                                                                   | 0.510672 | 10.38 | 10.2 | 7.92 | 9.84  | 9.98  | 7.05  | 9.21  | 8.26  | 9.79  | 5.46 |
| 220577_at   | GVIN1        | GTPase, very large interferon inducible 1                                                                                   | 0.511217 | 6.53  | 7.16 | 4.01 | 6.73  | 6.82  | 4.17  | 7.07  | 5.72  | 6.55  | 4.59 |
| 244356_at   | ---          | ---                                                                                                                         | 0.511662 | 8.3   | 6.86 | 7.4  | 8.49  | 6.09  | 5.73  | 7.72  | 6.23  | 8.34  | 6.75 |
| 214525_x_at | MLH3         | mutL homolog 3 (E. coli)                                                                                                    | 0.5118   | 5.21  | 4.17 | 6.34 | 6.83  | 6.2   | 10.25 | 7.2   | 7.54  | 6.77  | 7.64 |
| 206110_at   | ---          | ---                                                                                                                         | 0.5118   | 5.42  | 4.87 | 6.3  | 6.4   | 7.41  | 10.86 | 7.63  | 8.98  | 5.6   | 7.49 |
| 230086_at   | FNBP1        | formin binding protein 1                                                                                                    | 0.5118   | 8.14  | 6.83 | 6.97 | 8.09  | 5.6   | 5.21  | 7.36  | 6.6   | 7.78  | 6.07 |
| 224983_at   | SCARB2       | scavenger receptor class B, member 2                                                                                        | 0.5118   | 4.05  | 5    | 5.31 | 5.18  | 6.98  | 7.67  | 5.42  | 6.47  | 4.69  | 6.63 |
| 239758_at   | ---          | ---                                                                                                                         | 0.5118   | 6.01  | 5.85 | 3.34 | 4.27  | 5.95  | 3.59  | 6.14  | 4.24  | 7.41  | 5    |
| 212980_at   | USP34        | ubiquitin specific peptidase 34                                                                                             | 0.5118   | 6.75  | 6.87 | 5.48 | 5.65  | 6.7   | 4.84  | 4.84  | 6.45  | 6.83  | 3.8  |
| 212820_at   | DMXL2        | Dmx-like 2                                                                                                                  | 0.5118   | 7.99  | 7.51 | 8.1  | 8.02  | 7.78  | 6.69  | 7.67  | 6.94  | 8.43  | 4.98 |
| 214442_s_at | PIAS2        | protein inhibitor of activated STAT, 2                                                                                      | 0.5118   | 4.78  | 3.01 | 6.19 | 5.35  | 4.48  | 3.65  | 6.91  | 5.05  | 6.01  | 4.89 |
| 205221_at   | HGD          | homogentisate 1,2-dioxygenase (homogentisate oxidase) zinc finger (CCCH type), RNA-binding motif and serine/arginine rich 2 | 0.5118   | 5.57  | 5.62 | 6.01 | 5.76  | 5.63  | 8.51  | 6.74  | 7.74  | 5.77  | 5.79 |
| 208174_x_at | ZRSR2        | rich 2                                                                                                                      | 0.5118   | 8.94  | 9.83 | 7.72 | 7.82  | 8.47  | 6.72  | 8.73  | 7.66  | 7.99  | 6.48 |
| 228967_at   | EIF1         | Eukaryotic translation initiation factor 1                                                                                  | 0.5118   | 9.85  | 8.16 | 10.3 | 9.26  | 8.15  | 8.56  | 9.5   | 8.84  | 10.46 | 7.37 |
| 243361_at   | SFRS12       | splicing factor, arginine/serine-rich 12                                                                                    | 0.512163 | 6.87  | 4.28 | 3.29 | 3.74  | 3.97  | 4.04  | 6.09  | 3.33  | 6.64  | 3.79 |
| 1562468_at  | ---          | ---                                                                                                                         | 0.512409 | 10.42 | 7.71 | 9.03 | 9.32  | 8.22  | 7.07  | 9.65  | 8.91  | 9.87  | 8.13 |

|             |                 |                                                                                  |          |       |       |       |       |       |       |       |       |       |       |
|-------------|-----------------|----------------------------------------------------------------------------------|----------|-------|-------|-------|-------|-------|-------|-------|-------|-------|-------|
| 235597_s_at | RGPD1 /// RGPD2 | RANBP2-like and GRIP domain containing 1 /// RANBP2-like and GRIP domain contain | 0.512409 | 6.04  | 7.21  | 6.24  | 6.93  | 4.83  | 4.54  | 6.3   | 5.67  | 7.57  | 4.83  |
| 209839_at   | DNM3            | dynamins 3                                                                       | 0.512409 | 4.28  | 4.18  | 3.53  | 6.32  | 5.76  | 8.38  | 6.26  | 6.6   | 4.83  | 4.8   |
| 218102_at   | DERA            | 2-deoxyribose-5-phosphate aldolase homolog (C. elegans)                          | 0.512409 | 6.29  | 6.62  | 4.83  | 5.81  | 6.93  | 8.03  | 5.87  | 7.67  | 6.13  | 7.84  |
| 223204_at   | C4orf18         | chromosome 4 open reading frame 18                                               | 0.512946 | 2.36  | 4.01  | 3.58  | 3.4   | 5.79  | 7.02  | 6.38  | 6.9   | 3.04  | 3.04  |
| 230014_at   | ---             | ---                                                                              | 0.512946 | 10.7  | 7.89  | 10.17 | 8.24  | 8.13  | 8.03  | 9.66  | 9.25  | 9.98  | 8.39  |
| 228617_at   | XAF1            | XIAP associated factor 1                                                         | 0.513225 | 7.69  | 7.62  | 6.71  | 9.41  | 8.51  | 6.09  | 7.17  | 3.17  | 8.9   | 5.66  |
| 238183_at   | ---             | ---                                                                              | 0.513225 | 5.7   | 4.48  | 5.62  | 8.15  | 4.55  | 9.25  | 6.52  | 9.1   | 7.21  | 4.99  |
| 211005_at   | LAT /// SPNS1   | linker for activation of T cells /// spinster homolog 1 (Drosophila)             | 0.513225 | 6.86  | 4.97  | 5.7   | 7.37  | 8.29  | 6.73  | 9.86  | 7.99  | 8.22  | 7.97  |
| 1555225_at  | C1orf43         | chromosome 1 open reading frame 43                                               | 0.513225 | 8.32  | 8.23  | 9.12  | 7.38  | 7.76  | 4.56  | 7.75  | 4.44  | 8.83  | 7.41  |
| 212286_at   | ANKRD12         | ankyrin repeat domain 12                                                         | 0.513913 | 9.96  | 8.75  | 6.1   | 8.89  | 8.82  | 6.17  | 8.9   | 7.12  | 8.79  | 7.83  |
| 214509_at   | HIST1H3I        | histone cluster 1, H3i                                                           | 0.513913 | 4.1   | 4.69  | 4.46  | 5.58  | 5.04  | 8.7   | 6     | 7.29  | 5.2   | 7.62  |
| 205178_s_at | RBBP6           | retinoblastoma binding protein 6                                                 | 0.513913 | 9.01  | 8.22  | 5.38  | 8.37  | 8.85  | 5.11  | 8.44  | 7.37  | 8.45  | 6.06  |
| 209045_at   | XPNPEP1         | X-prolyl aminopeptidase (aminopeptidase P) 1, soluble                            | 0.513913 | 3.69  | 5.69  | 3.86  | 4.47  | 4.87  | 7.57  | 6.61  | 5.91  | 4.16  | 6.32  |
| 223236_at   | CCDC55          | coiled-coil domain containing 55                                                 | 0.513913 | 7.54  | 7.75  | 6.76  | 7.46  | 7.71  | 5.01  | 6.74  | 6.56  | 7.06  | 4.85  |
| 242182_x_at | ---             | ---                                                                              | 0.513913 | 8.18  | 7.62  | 5.49  | 5.93  | 6.97  | 5.01  | 7.76  | 6.34  | 7.42  | 4.96  |
| 213918_s_at | NIPBL           | Nipped-B homolog (Drosophila)                                                    | 0.513913 | 9.41  | 9.28  | 8.43  | 9.14  | 9.03  | 6.9   | 9.68  | 8.31  | 9.04  | 6.26  |
| 205010_at   | GNL3L           | guanine nucleotide binding protein-like 3 (nucleolar)-like                       | 0.513913 | 6.37  | 5.25  | 6.46  | 5.83  | 5.19  | 4.99  | 7.64  | 4.5   | 6.64  | 4.51  |
| 227062_at   | NCRNA00084      | non-protein coding RNA 84                                                        | 0.51407  | 10.07 | 8.29  | 9.33  | 9.71  | 7.93  | 7.21  | 9.18  | 8.19  | 10.99 | 7.34  |
| 205033_s_at | LOC728358       | defensin, alpha 1 /// defensin, alpha 3, neutrophil-specific /// defensin, alpha | 0.514132 | 9.69  | 12.14 | 12.09 | 11.54 | 12.61 | 13.7  | 12.77 | 13.96 | 12.11 | 14.06 |
| 215779_s_at | HIST1H2BG       | histone cluster 1, H2bg                                                          | 0.514132 | 5.74  | 6.55  | 6.9   | 5.99  | 6.82  | 9     | 6.57  | 8     | 6.14  | 7.65  |
| 226370_at   | KLHL15          | kelch-like 15 (Drosophila)                                                       | 0.514132 | 8.05  | 7.54  | 7.77  | 8.05  | 7.42  | 4.66  | 8.16  | 6.57  | 7.14  | 6.4   |
| 208994_s_at | PPIG            | peptidylprolyl isomerase G (cyclophilin G)                                       | 0.514256 | 10.45 | 10.46 | 8.31  | 9.67  | 10.08 | 8.57  | 9.63  | 9.32  | 9.68  | 6.64  |
| 225775_at   | TSPAN33         | tetraspanin 33                                                                   | 0.51519  | 6.42  | 7.21  | 6.32  | 7.03  | 7.38  | 10.64 | 8.3   | 9.4   | 7     | 8.01  |
| 225694_at   | CRKRS           | Cdc2-related kinase, arginine/serine-rich                                        | 0.515455 | 8     | 7.61  | 7.05  | 8.34  | 7.7   | 6.24  | 7.9   | 6.26  | 9.14  | 5.33  |
| 1569538_at  | ---             | ---                                                                              | 0.516648 | 6.46  | 7.7   | 5.44  | 5.35  | 5.79  | 4.56  | 6.04  | 4     | 6.12  | 5.61  |
| 223106_at   | TMEM14C         | transmembrane protein 14C                                                        | 0.51739  | 4     | 6.05  | 6.63  | 5.6   | 7.06  | 7.89  | 6.85  | 7.4   | 6.97  | 7.63  |
| 243772_at   | SDCCAG8         | serologically defined colon cancer antigen 8                                     | 0.517512 | 5.1   | 5.01  | 6.01  | 5.9   | 6.04  | 6.32  | 3.92  | 5.95  | 5.44  | 8.21  |
| 1557049_at  | LOC149478       | Hypothetical protein LOC149478                                                   | 0.518344 | 6.88  | 4.11  | 5.86  | 6.53  | 5.47  | 4.15  | 6.81  | 4.07  | 7.07  | 3.97  |
| 244433_at   | ---             | ---                                                                              | 0.519125 | 6.6   | 6.58  | 6.02  | 6.93  | 5.67  | 4.11  | 6.5   | 3.12  | 5.9   | 7.49  |
| 236002_at   | ---             | ---                                                                              | 0.519702 | 7.14  | 6.47  | 4.58  | 5.88  | 6.59  | 4.81  | 6.65  | 4.86  | 7.15  | 4.79  |
| 1556107_at  | ---             | ---                                                                              | 0.521203 | 6.57  | 4.73  | 6.39  | 7.24  | 4.79  | 5.04  | 5.93  | 5.21  | 5.02  | 2.91  |
| 242853_at   | ---             | ---                                                                              | 0.521499 | 7.85  | 5.8   | 6.04  | 6.65  | 7.21  | 6.95  | 8.81  | 6.77  | 8.18  | 5.32  |
| 223117_s_at | USP47           | ubiquitin specific peptidase 47                                                  | 0.521499 | 6.72  | 5.85  | 5.37  | 5.98  | 7.68  | 4.47  | 6.96  | 7.53  | 6.72  | 4.01  |
| 229935_s_at | MLL             | Myeloid/lymphoid or mixed-lineage leukemia (trithorax homolog, Drosophila)       | 0.521499 | 5.01  | 5.35  | 3.36  | 4.61  | 6.73  | 4.95  | 6.2   | 4.58  | 6.22  | 3.33  |
| 226740_x_at | NBPF1           | Neuroblastoma breakpoint family, member 1                                        | 0.521499 | 10.08 | 10.27 | 7.63  | 9.29  | 9.57  | 8.09  | 10.05 | 8.05  | 10.49 | 8.11  |
| 211571_s_at | VCAN            | versican                                                                         | 0.522724 | 5.6   | 8.03  | 5.81  | 8.12  | 7.92  | 9.39  | 10.14 | 9.69  | 7.6   | 5.71  |
| 218166_s_at | RSF1            | remodeling and spacing factor 1                                                  | 0.522724 | 7.26  | 7.08  | 4.42  | 6.7   | 7.01  | 4.58  | 6.8   | 6.44  | 7.17  | 4.16  |

|              |                                       |                                                                                  |          |       |       |       |       |       |       |       |       |       |      |
|--------------|---------------------------------------|----------------------------------------------------------------------------------|----------|-------|-------|-------|-------|-------|-------|-------|-------|-------|------|
| 208792_s_at  | CLU                                   | clusterin                                                                        | 0.522927 | 5.86  | 5.63  | 6.07  | 6.56  | 6.8   | 9.77  | 7.73  | 7.64  | 6.27  | 7.53 |
| 1566981_at   | ---                                   | ---                                                                              | 0.522927 | 6.15  | 4.82  | 5.43  | 5.67  | 5.4   | 4.73  | 6.28  | 6.97  | 7.9   | 4.5  |
| 226603_at    | SAMD9L                                | sterile alpha motif domain containing 9-like                                     | 0.5234   | 7.46  | 7.23  | 8.48  | 9.08  | 7.72  | 5.78  | 6.53  | 6.37  | 8.22  | 7.74 |
| 207426_s_at  | TNFSF4                                | tumor necrosis factor (ligand) superfamily, member 4                             | 0.523487 | 4.36  | 3.46  | 2.99  | 3.95  | 3.2   | 8.3   | 6.05  | 6.58  | 3.69  | 5.59 |
| 211796_s_at  | TRBC1 /// TRBC2                       | T cell receptor beta constant 1 /// T cell receptor beta constant 2              | 0.523782 | 8.58  | 7.47  | 3.93  | 7.93  | 9.57  | 7.23  | 11    | 7.04  | 8.61  | 6.19 |
| 208450_at    | LGALS2                                | lectin, galactoside-binding, soluble, 2                                          | 0.523782 | 5.94  | 7.61  | 5.95  | 5.66  | 6.64  | 6.82  | 9.92  | 10.2  | 5.96  | 6.53 |
| 217216_x_at  | MLH3                                  | mutL homolog 3 (E. coli)                                                         | 0.523782 | 4.08  | 3.71  | 6.43  | 6.69  | 6.14  | 10.01 | 7.16  | 7.61  | 6.86  | 7.46 |
| 206851_at    | RNASE3                                | ribonuclease, RNase A family, 3 (eosinophil cationic protein)                    | 0.523782 | 6.04  | 6.69  | 4.91  | 4.6   | 6.67  | 7.46  | 5.82  | 9.86  | 6.27  | 8.61 |
| 214670_at    | ZKSCAN1                               | zinc finger with KRAB and SCAN domains 1                                         | 0.523782 | 6.91  | 7.16  | 4.84  | 6.27  | 5.88  | 2.93  | 6.62  | 6.47  | 6.48  | 4    |
| 212672_at    | ATM                                   | ataxia telangiectasia mutated                                                    | 0.523782 | 7.73  | 8.01  | 6.64  | 6.57  | 6.61  | 4.25  | 8.66  | 6.65  | 7.82  | 4.42 |
| 1556597_a_at | LOC284513                             | hypothetical protein LOC284513                                                   | 0.523782 | 7.88  | 6.34  | 6     | 4.05  | 6.38  | 4.38  | 7.2   | 6.86  | 7.95  | 5.06 |
| 225522_at    | AAK1                                  | AP2 associated kinase 1                                                          | 0.523782 | 8.61  | 8.72  | 5.48  | 8.83  | 9.05  | 7.33  | 9.81  | 8.27  | 9.15  | 7.05 |
| 244811_at    | PHIP                                  | pleckstrin homology domain interacting protein                                   | 0.523782 | 7.36  | 6.75  | 5.67  | 6.21  | 5.54  | 3.71  | 6.13  | 5.24  | 6.11  | 3.88 |
| 201251_at    | PKM2                                  | pyruvate kinase, muscle                                                          | 0.523782 | 6.63  | 6.96  | 6.76  | 7.08  | 7.6   | 10.03 | 7.81  | 8.75  | 6.99  | 8.04 |
| 1557384_at   | ZNF131                                | Zinc finger protein 131                                                          | 0.523782 | 7.22  | 6.26  | 5.06  | 6.04  | 6.29  | 4.31  | 6.93  | 6.88  | 8.01  | 5.06 |
| 238490_at    | KIAA2026                              | KIAA2026                                                                         | 0.523782 | 7.25  | 7.92  | 6.12  | 6.87  | 6.48  | 5.88  | 7.27  | 5.35  | 6.41  | 3.66 |
| 231038_s_at  | ---                                   | ---                                                                              | 0.523782 | 10.84 | 10.72 | 10.01 | 9.74  | 10.2  | 9.07  | 10.51 | 10.24 | 11.03 | 7.04 |
| 238978_at    | ---                                   | ---                                                                              | 0.523782 | 6     | 5.67  | 5.25  | 6.61  | 4.86  | 7.85  | 3.94  | 5.68  | 6.53  | 8.41 |
| 233674_at    | ---                                   | ---                                                                              | 0.523782 | 7.22  | 6.07  | 5.05  | 5.63  | 5.14  | 4.31  | 6.14  | 4.02  | 7.16  | 4.43 |
| 232569_at    | ---                                   | ---                                                                              | 0.523782 | 6.69  | 7.34  | 6.19  | 6.11  | 7.08  | 5.8   | 5.54  | 3.6   | 7.21  | 5.93 |
| 233656_s_at  | VPS54                                 | vacuolar protein sorting 54 homolog (S. cerevisiae)                              | 0.523782 | 4.48  | 7.55  | 5.14  | 6.09  | 4.87  | 6.96  | 4.84  | 4.08  | 5.08  | 6.07 |
| 207815_at    | PF4V1                                 | platelet factor 4 variant 1                                                      | 0.5242   | 3.51  | 3.39  | 2.13  | 4.21  | 4.48  | 8.89  | 5.91  | 7.93  | 5.97  | 6.86 |
| 204619_s_at  | VCAN                                  | versican                                                                         | 0.5242   | 3.42  | 4.98  | 3.76  | 4.24  | 4.97  | 7.32  | 7.97  | 6.63  | 5.23  | 4.09 |
| 207017_at    | RAB27B                                | RAB27B, member RAS oncogene family                                               | 0.5242   | 5.07  | 5.46  | 6.06  | 6.64  | 6.85  | 10.61 | 7.12  | 8.59  | 7.6   | 7.19 |
| 218332_at    | BEX1                                  | brain expressed, X-linked 1                                                      | 0.5242   | 6     | 6.03  | 5     | 5.08  | 6.22  | 7.96  | 4.87  | 8.86  | 4.77  | 8.52 |
| 218666_s_at  | STX17                                 | syntaxin 17                                                                      | 0.5242   | 7.21  | 6.65  | 7.33  | 6.55  | 7.58  | 3.43  | 5.41  | 7.4   | 6.92  | 7.61 |
| 237949_at    | ---                                   | ---                                                                              | 0.5242   | 8.04  | 7.02  | 9.31  | 6.3   | 6.2   | 7.39  | 8.11  | 8.12  | 7.57  | 5.19 |
| 230407_at    | ---                                   | ---                                                                              | 0.5242   | 7.71  | 8.16  | 7.62  | 6.28  | 6.57  | 5.13  | 6.66  | 6.69  | 6.57  | 4.14 |
| 203791_at    | DMXL1                                 | Dmx-like 1                                                                       | 0.5242   | 6.6   | 6.78  | 6.51  | 6.77  | 7.68  | 4.29  | 7.24  | 6.52  | 6.92  | 4.68 |
| 36552_at     | C2CD3                                 | C2 calcium-dependent domain containing 3                                         | 0.5242   | 7.48  | 7.6   | 6.27  | 5.59  | 7     | 5.56  | 7.66  | 4.91  | 7.61  | 6.08 |
| 217294_s_at  | ENO1                                  | enolase 1, (alpha)                                                               | 0.5242   | 5.72  | 6.76  | 5.12  | 7.14  | 5.94  | 8     | 7.6   | 7.12  | 4.52  | 5.3  |
| 221230_s_at  | ARID4B                                | AT rich interactive domain 4B (RBP1-like)                                        | 0.5242   | 10.64 | 10.57 | 9.46  | 10.46 | 10.29 | 7.74  | 10.01 | 9.58  | 10.13 | 7.34 |
| 232601_at    | ---                                   | ---                                                                              | 0.5242   | 9.89  | 8.6   | 6.25  | 7.82  | 8.77  | 6.92  | 8.73  | 7.95  | 8.94  | 7.32 |
| 226111_s_at  | ZNF385A                               | zinc finger protein 385A                                                         | 0.5242   | 4.62  | 4.45  | 4.43  | 5.43  | 4.8   | 7.61  | 6.18  | 6.39  | 4.63  | 4.07 |
| 228999_at    | CHD2                                  | chromodomain helicase DNA binding protein 2                                      | 0.5242   | 8.13  | 6.65  | 7.32  | 8.18  | 6.82  | 6.43  | 6.92  | 4.5   | 7.51  | 5.73 |
| 208591_s_at  | PDE3B                                 | phosphodiesterase 3B, cGMP-inhibited                                             | 0.5242   | 8.79  | 8.94  | 8.16  | 8.98  | 9.31  | 7.32  | 8.44  | 7     | 9.66  | 6.72 |
| 1553626_a_at | C17orf57                              | chromosome 17 open reading frame 57                                              | 0.525149 | 4.89  | 4.14  | 3.8   | 5.11  | 6.52  | 9.88  | 6.4   | 10.29 | 7.14  | 9.84 |
| 215193_x_at  | HLA-DRB1 /// HLA-DRB3<br>/// HLA-DRB4 | major histocompatibility complex, class II, DR beta 1 /// major histocompatibili | 0.525383 | 6     | 8.98  | 8.2   | 8.51  | 8.38  | 10.45 | 9.07  | 9.71  | 7.2   | 7.83 |
| 243469_at    | ---                                   | ---                                                                              | 0.525383 | 7.87  | 6.7   | 5.98  | 7.81  | 6.24  | 6.14  | 6.62  | 5.69  | 8.86  | 5.54 |
| 235376_at    | ---                                   | ---                                                                              | 0.525383 | 10.25 | 9.45  | 7.68  | 9.37  | 9.16  | 7.51  | 9.7   | 8.86  | 10.45 | 7.49 |
| 209555_s_at  | CD36                                  | CD36 molecule (thrombospondin receptor)                                          | 0.52627  | 3.21  | 4.98  | 6.14  | 4.1   | 6.28  | 9.39  | 7.81  | 8.96  | 3.6   | 3.56 |



|              |                                       |                                                                                  |          |      |      |       |       |       |       |       |       |       |      |
|--------------|---------------------------------------|----------------------------------------------------------------------------------|----------|------|------|-------|-------|-------|-------|-------|-------|-------|------|
| 213957_s_at  | CEP350                                | centrosomal protein 350kDa                                                       | 0.52627  | 7.57 | 8.19 | 5.95  | 7.5   | 6.15  | 4.42  | 7.34  | 5.66  | 7.47  | 4.98 |
| 223548_at    | C1orf26                               | chromosome 1 open reading frame 26                                               | 0.526638 | 6.92 | 6.03 | 4.61  | 6.75  | 6.32  | 4.67  | 7.44  | 4.59  | 6.55  | 4.84 |
| 233490_at    | DCTN4                                 | dynactin 4 (p62)                                                                 | 0.527274 | 6.03 | 4.32 | 4.9   | 6.34  | 5.08  | 5.81  | 7.53  | 5.32  | 6.52  | 3.1  |
| 234574_at    | ---                                   | ---                                                                              | 0.527918 | 8.84 | 7.95 | 6.61  | 8.11  | 8.05  | 5.93  | 6.85  | 5.91  | 7.65  | 5.52 |
| 223777_at    | MGC13005                              | hypothetical LOC84771                                                            | 0.527918 | 4.16 | 4.24 | 4.17  | 4.87  | 3.53  | 8.45  | 6.41  | 6.54  | 5.09  | 5.97 |
| 212566_at    | MAP4                                  | microtubule-associated protein 4                                                 | 0.527918 | 6.07 | 6.85 | 7.39  | 4.79  | 7.72  | 5.63  | 7.96  | 6.77  | 7.06  | 5.54 |
| 212783_at    | RBBP6                                 | retinoblastoma binding protein 6                                                 | 0.528088 | 8.65 | 7.33 | 5.11  | 8.15  | 7.9   | 4.99  | 7.97  | 5.92  | 8.59  | 6.38 |
| 202842_s_at  | DNAJB9                                | DnaJ (Hsp40) homolog, subfamily B, member 9                                      | 0.528088 | 10.7 | 8.17 | 11.02 | 11.06 | 10.55 | 8.44  | 10.65 | 7.97  | 10.38 | 8.25 |
| 217534_at    | FAM49B                                | family with sequence similarity 49, member B                                     | 0.528088 | 7.16 | 6.2  | 3.94  | 6.5   | 5.9   | 4.5   | 6.34  | 5.93  | 6.58  | 4.94 |
| 219864_s_at  | RCAN3                                 | RCAN family member 3                                                             | 0.528907 | 6.19 | 4.89 | 3.27  | 6.91  | 7.13  | 7.03  | 8.77  | 8.16  | 7.63  | 3.59 |
| 221731_x_at  | VCAN                                  | versican                                                                         | 0.528907 | 4.66 | 6.32 | 3.92  | 7.32  | 5.6   | 9.43  | 8.74  | 8.05  | 6.01  | 3.09 |
| 212197_x_at  | MPRIIP                                | myosin phosphatase Rho interacting protein                                       | 0.528907 | 7.27 | 8.04 | 5.58  | 7.18  | 8.59  | 6.49  | 7.86  | 5.39  | 8.24  | 6.37 |
| 241786_at    | ---                                   | ---                                                                              | 0.529126 | 8.15 | 7.15 | 7.27  | 7.37  | 6.95  | 7.52  | 8.92  | 7.66  | 8.44  | 5.08 |
| 203582_s_at  | RAB4A                                 | RAB4A, member RAS oncogene family                                                | 0.529552 | 6.46 | 6.72 | 4.92  | 6.45  | 6.78  | 8.96  | 6.99  | 7.69  | 5.49  | 9.54 |
| 221118_at    | PKD2L2                                | polycystic kidney disease 2-like 2                                               | 0.529552 | 7.94 | 8.18 | 7.73  | 8.05  | 7.64  | 6.99  | 7.89  | 7.88  | 8.04  | 4.57 |
| 209301_at    | CA2                                   | carbonic anhydrase II                                                            | 0.530198 | 4.86 | 5.21 | 5.42  | 5.8   | 5.87  | 8.64  | 6.44  | 7.42  | 5.03  | 6.05 |
| 217535_at    | FAM49B                                | Family with sequence similarity 49, member B                                     | 0.531166 | 9.83 | 8.94 | 6.69  | 9.08  | 8.11  | 7.14  | 8.57  | 8.67  | 9.07  | 7.11 |
| 242904_x_at  | ---                                   | ---                                                                              | 0.531734 | 10.1 | 8.61 | 9.8   | 8.76  | 6.04  | 6.23  | 9.22  | 8.94  | 9.3   | 9.41 |
| 234284_at    | GNG8                                  | guanine nucleotide binding protein (G protein), gamma 8                          | 0.531734 | 6.3  | 6.04 | 6.67  | 6.33  | 6.18  | 9.51  | 6.37  | 6.32  | 6.27  | 6.59 |
| 214808_at    | ---                                   | ---                                                                              | 0.532312 | 9.31 | 9.88 | 5.36  | 9     | 9.14  | 7.02  | 8.89  | 6.51  | 9.99  | 5.84 |
| 242106_at    | ---                                   | ---                                                                              | 0.532312 | 6.76 | 5.44 | 7.05  | 6.45  | 5.43  | 3.39  | 4.72  | 5.34  | 7.02  | 4.93 |
| 209312_x_at  | HLA-DRB1 /// HLA-DRB4<br>/// HLA-DRB5 | major histocompatibility complex, class II, DR beta 1 /// major histocompatibili | 0.532312 | 6.51 | 10   | 9.03  | 9.12  | 9.27  | 11.28 | 10.07 | 10.57 | 8.27  | 9.02 |
| 204622_x_at  | NR4A2                                 | nuclear receptor subfamily 4, group A, member 2                                  | 0.532312 | 8.51 | 4.01 | 7.64  | 8.52  | 6.61  | 5.33  | 7.79  | 4.82  | 8.65  | 4.83 |
| 214673_s_at  | HUWE1                                 | HECT, UBA and WWE domain containing 1                                            | 0.532312 | 7.92 | 8.16 | 6.37  | 6.53  | 8.32  | 4.09  | 7.64  | 6.19  | 6.81  | 5.02 |
| 212764_at    | ZEB1                                  | zinc finger E-box binding homeobox 1                                             | 0.532312 | 8.01 | 8.2  | 6.12  | 8.2   | 7.46  | 4.38  | 7.48  | 6.75  | 7.61  | 6.06 |
| 201121_s_at  | PGRMC1                                | progesterone receptor membrane component 1                                       | 0.533444 | 7.8  | 7.35 | 6.91  | 8.3   | 8.59  | 10.85 | 9.66  | 10.65 | 8.52  | 9.57 |
| 1555691_a_at | KLRK1                                 | killer cell lectin-like receptor subfamily K, member 1                           | 0.533697 | 8.25 | 5.33 | 4.18  | 7.12  | 7.41  | 5.55  | 9.98  | 4.55  | 6.74  | 6.13 |
| 214523_at    | CEBPE                                 | CCAAT/enhancer binding protein (C/EBP), epsilon                                  | 0.533968 | 6.34 | 6.53 | 6.15  | 6.36  | 7.46  | 8.91  | 6.17  | 8.39  | 6.74  | 8.05 |
| 223717_s_at  | ACRBP                                 | acrosin binding protein                                                          | 0.534445 | 6.54 | 5.75 | 6.53  | 7.67  | 7.47  | 11.2  | 8.78  | 9.77  | 7.4   | 7.75 |
| 204550_x_at  | GSTM1                                 | glutathione S-transferase mu 1                                                   | 0.534445 | 5.44 | 6.78 | 4.68  | 5.54  | 6.67  | 7.65  | 6.21  | 8.16  | 6.34  | 6.92 |
| 207802_at    | CRISP3                                | cysteine-rich secretory protein 3                                                | 0.535072 | 5.71 | 6.46 | 8.1   | 7     | 6.86  | 7.78  | 6.03  | 8.49  | 3.85  | 5.69 |
| 215175_at    | PCNX                                  | pecanex homolog (Drosophila)                                                     | 0.535072 | 6.96 | 4.97 | 6.1   | 7.36  | 5.49  | 6.09  | 6.46  | 6.47  | 7.7   | 4.46 |
| 200762_at    | DPYSL2                                | dihydropyrimidinase-like 2                                                       | 0.535129 | 5.73 | 6.45 | 6.88  | 6.83  | 7.75  | 9.71  | 8.97  | 9.45  | 7.21  | 6.38 |
| 219777_at    | GIMAP6                                | GTPase, IMAP family member 6                                                     | 0.536068 | 5.17 | 5.5  | 4     | 3.99  | 5.95  | 6.21  | 7.35  | 6.52  | 6.53  | 5.34 |
| 1555446_s_at | TRAPPC10                              | trafficking protein particle complex 10                                          | 0.536068 | 7.26 | 5.84 | 5.47  | 6.42  | 6.18  | 5.17  | 6.31  | 4.23  | 7.39  | 4.19 |
| 244235_at    | IVNS1ABP                              | influenza virus NS1A binding protein                                             | 0.536108 | 9.41 | 6.88 | 7.97  | 8.94  | 8.59  | 6.41  | 9.91  | 7.2   | 9.36  | 6.02 |
| 218370_s_at  | S100PBP                               | S100P binding protein                                                            | 0.536342 | 6.07 | 4.02 | 3.36  | 5.15  | 7     | 4.9   | 6.09  | 6.26  | 5.75  | 3.89 |
| 1559756_at   | DKFZp667F0711                         | hypothetical protein DKFZp667F0711                                               | 0.53819  | 7.76 | 6.6  | 4.92  | 6.6   | 6.27  | 5.25  | 6.74  | 6.03  | 6.41  | 3.23 |
| 1570552_at   | C18orf50                              | chromosome 18 open reading frame 50                                              | 0.538855 | 6.39 | 4.34 | 3.82  | 5.72  | 6.43  | 5.3   | 8.12  | 6.33  | 4.61  | 6.53 |
| 205488_at    | GZMA                                  | granzyme A (granzyme 1, cytotoxic T-lymphocyte-associated serine esterase 3)     | 0.538855 | 7.75 | 6.3  | 4.94  | 7.89  | 8.88  | 6.5   | 10.39 | 6.6   | 8.11  | 6.66 |
| 216248_s_at  | NR4A2                                 | nuclear receptor subfamily 4, group A, member 2                                  | 0.538855 | 7.52 | 3.09 | 6.91  | 7.65  | 5.27  | 4.75  | 6.37  | 3.52  | 7.44  | 3.18 |

|              |                                    |                                                                                 |          |       |       |       |       |       |       |      |       |       |      |
|--------------|------------------------------------|---------------------------------------------------------------------------------|----------|-------|-------|-------|-------|-------|-------|------|-------|-------|------|
| 208073_x_at  | TTC3                               | tetratricopeptide repeat domain 3                                               | 0.538855 | 6.48  | 6.81  | 4.18  | 6.41  | 6.17  | 5.05  | 8.19 | 5.36  | 6.35  | 3.11 |
| 1562056_at   | ---                                | ---                                                                             | 0.538855 | 6.38  | 4.63  | 5.82  | 6.99  | 6.05  | 2.68  | 4.91 | 5.74  | 6.51  | 6.41 |
| 213566_at    | RNASE6                             | ribonuclease, RNase A family, k6                                                | 0.538855 | 10.07 | 10.29 | 9.49  | 9.15  | 9.64  | 11.34 | 8.41 | 9.54  | 7.16  | 6.8  |
| 230833_at    | ACRBP                              | acrosin binding protein                                                         | 0.538855 | 5.28  | 5.47  | 5.7   | 6.23  | 6.1   | 10.14 | 7.33 | 7.87  | 6.18  | 6.4  |
| 1562865_at   | ---                                | ---                                                                             | 0.538855 | 7.62  | 6.52  | 5.06  | 5.68  | 5.73  | 3.95  | 6.91 | 4.25  | 6.72  | 4.49 |
| 1563327_a_at | CXorf31                            | chromosome X open reading frame 31                                              | 0.538855 | 6.47  | 5.57  | 8.43  | 6.38  | 5.18  | 5.5   | 5.83 | 7.05  | 6.64  | 4.96 |
| 1555409_a_at | BAGE2 /// BAGE3 /// BAGE5 /// MLL3 | B melanoma antigen family, member 2 /// B melanoma antigen family, member 3 /// | 0.538855 | 7.7   | 6.39  | 3.89  | 6.15  | 6.62  | 4.6   | 6.92 | 5.31  | 6.22  | 3.52 |
| 237497_at    | ---                                | ---                                                                             | 0.538855 | 7.61  | 6.31  | 6.88  | 8.09  | 6.83  | 4.57  | 8.39 | 7.77  | 8.29  | 7.47 |
| 222061_at    | CD58                               | CD58 molecule                                                                   | 0.538855 | 7.69  | 6.64  | 5.21  | 7.38  | 6.21  | 4.83  | 6.78 | 5.21  | 7.18  | 5.8  |
| 225114_at    | AGPS                               | alkylglycerone phosphate synthase                                               | 0.538855 | 4.95  | 6.46  | 3.68  | 5.22  | 6.59  | 6.28  | 5.94 | 7.5   | 6.24  | 7.23 |
| 217362_x_at  | HLA-DRB6                           | (pseudogene)                                                                    | 0.538855 | 5.63  | 7.94  | 7.56  | 7.98  | 7.68  | 9.38  | 8.4  | 8.88  | 7.11  | 7.66 |
| 208753_s_at  | NAP1L1                             | nucleosome assembly protein 1-like 1                                            | 0.538855 | 5.57  | 6.25  | 5.78  | 6.47  | 6.36  | 8.98  | 7.4  | 8.15  | 6.74  | 7.48 |
| 203357_s_at  | CAPN7                              | calpain 7                                                                       | 0.539484 | 7.93  | 7.99  | 8.05  | 7.61  | 6.96  | 5.6   | 7.51 | 5.24  | 7.79  | 6.39 |
| 234759_at    | ---                                | ---                                                                             | 0.539845 | 7.06  | 6.49  | 3.65  | 4.91  | 4.96  | 4.62  | 6.44 | 4.08  | 5.75  | 2.88 |
| 220657_at    | KLHL11                             | kelch-like 11 (Drosophila)                                                      | 0.539845 | 6.76  | 5.8   | 7.42  | 5.31  | 6.23  | 5.42  | 4.71 | 6.88  | 7.29  | 4.41 |
| 200965_s_at  | ABLIM1                             | actin binding LIM protein 1                                                     | 0.540106 | 6.23  | 4.87  | 3.39  | 5.9   | 7.69  | 6.63  | 8.34 | 5.63  | 6.61  | 4.94 |
| 227565_at    | ---                                | ---                                                                             | 0.540106 | 8.36  | 7.49  | 5.21  | 7.39  | 6.78  | 3.39  | 6.29 | 6.77  | 7.17  | 3.56 |
| 204621_s_at  | NR4A2                              | nuclear receptor subfamily 4, group A, member 2                                 | 0.540106 | 8.75  | 4.16  | 8.44  | 8.54  | 6.52  | 4.07  | 8.06 | 4.74  | 8.22  | 5.54 |
| 213524_s_at  | GOS2                               | G0/G1switch 2                                                                   | 0.541649 | 12.77 | 9.49  | 12.79 | 12.29 | 12.59 | 9.03  | 13   | 11.41 | 12.87 | 8.93 |
| 226040_at    | ---                                | ---                                                                             | 0.541993 | 7.71  | 7.79  | 3.92  | 5.83  | 7.95  | 4.62  | 7.54 | 7.85  | 8.12  | 3.76 |
| 1565656_x_at | ---                                | ---                                                                             | 0.541993 | 6.61  | 4.34  | 6.51  | 6.35  | 4.73  | 3.64  | 4.7  | 3.9   | 6.05  | 2.97 |
| 241817_at    | C3orf62                            | chromosome 3 open reading frame 62                                              | 0.541993 | 8.18  | 9.08  | 7.77  | 7.98  | 8.24  | 6.03  | 8.02 | 8.42  | 8.45  | 6    |
| 201137_s_at  | HLA-DPB1                           | major histocompatibility complex, class II, DP beta 1                           | 0.543369 | 5.78  | 8.07  | 4.99  | 6.51  | 8.3   | 10.66 | 8.8  | 9.28  | 8.44  | 8.13 |
| 211991_s_at  | HLA-DPA1                           | major histocompatibility complex, class II, DP alpha 1                          | 0.54387  | 4.61  | 7.13  | 4.92  | 5.92  | 7.21  | 9.11  | 7.48 | 7.66  | 6.07  | 6.15 |
| 212998_x_at  | HLA-DQB1                           | major histocompatibility complex, class II, DQ beta 1                           | 0.543983 | 8.23  | 9.04  | 8.25  | 8.98  | 6.62  | 10.03 | 8.39 | 9.81  | 6.93  | 5.79 |
| 209795_at    | CD69                               | CD69 molecule                                                                   | 0.545368 | 8.67  | 4.79  | 7.27  | 7.86  | 8.56  | 4.43  | 9.48 | 5.49  | 9.46  | 5.9  |
| 1564932_at   | ---                                | ---                                                                             | 0.545503 | 7.05  | 8.24  | 5.31  | 5.82  | 5.77  | 5.52  | 6.75 | 5.8   | 6.76  | 4.24 |
| 226588_at    | CWC22                              | CWC22 spliceosome-associated protein homolog (S. cerevisiae)                    | 0.545503 | 9.74  | 9.77  | 8.75  | 9.06  | 9.54  | 8.69  | 9.28 | 9.75  | 9.62  | 6.28 |
| 238762_at    | MTHFD2L                            | methylenetetrahydrofolate dehydrogenase (NADP+ dependent) 2-like                | 0.545709 | 4.7   | 3.3   | 3.76  | 3.97  | 5.67  | 7.17  | 6.04 | 4.4   | 4.44  | 6.55 |
| 1556003_a_at | ---                                | ---                                                                             | 0.547638 | 6.79  | 5.57  | 6.1   | 6.17  | 4.07  | 4.25  | 6.18 | 3.62  | 7.99  | 4    |
| 1558569_at   | UNQ6228                            | Hypothetical LOC100131541                                                       | 0.548307 | 6.56  | 5.93  | 4.8   | 6.24  | 6.35  | 3.96  | 6.85 | 5.63  | 6.88  | 7.44 |
| 233393_at    | ---                                | ---                                                                             | 0.548307 | 7.34  | 5.27  | 3.99  | 5.22  | 5.06  | 6.93  | 6.91 | 5.88  | 6.76  | 3.86 |
| 1552318_at   | GIMAP1                             | GTPase, IMAP family member 1                                                    | 0.549512 | 4.14  | 4.08  | 3.23  | 5.19  | 6     | 6.69  | 7.04 | 6.3   | 5.22  | 3.42 |
| 1560306_at   | ---                                | ---                                                                             | 0.549512 | 7.31  | 5.02  | 5.3   | 5.46  | 6.32  | 4.7   | 6.06 | 5.5   | 6.96  | 3.44 |
| 226218_at    | IL7R                               | interleukin 7 receptor                                                          | 0.550524 | 7.71  | 5.71  | 5.51  | 7.53  | 8.25  | 6.23  | 9.58 | 5.38  | 6.89  | 5.82 |
| 214349_at    | ---                                | ---                                                                             | 0.550818 | 6.66  | 6.36  | 6.49  | 6.04  | 6.64  | 10.58 | 8.11 | 10.38 | 7.58  | 7.94 |
| 239331_at    | ---                                | ---                                                                             | 0.550818 | 6.93  | 6.24  | 6.5   | 7.52  | 6.16  | 7.93  | 7.41 | 5.48  | 7.96  | 4.66 |
| 240481_at    | ---                                | ---                                                                             | 0.550943 | 7.83  | 5.44  | 7.17  | 7.51  | 6.49  | 4.98  | 6.69 | 5.23  | 6.76  | 3.41 |
| 223380_s_at  | LATS2                              | LATS, large tumor suppressor, homolog 2 (Drosophila)                            | 0.551038 | 6.6   | 7.17  | 7.45  | 8.58  | 6.14  | 4.76  | 6.36 | 6.57  | 6.92  | 7.82 |
| 235482_at    | LOC400960                          | hypothetical gene supported by BC040598                                         | 0.552255 | 7.35  | 7.84  | 5.49  | 6.16  | 5.07  | 4.51  | 5.96 | 4.49  | 7.72  | 5.46 |

|              |                       |                                                                                                   |          |       |       |      |       |       |       |       |       |       |      |
|--------------|-----------------------|---------------------------------------------------------------------------------------------------|----------|-------|-------|------|-------|-------|-------|-------|-------|-------|------|
| 206116_s_at  | TPM1                  | tropomyosin 1 (alpha)                                                                             | 0.553743 | 7.73  | 8.28  | 8.5  | 8.35  | 7.41  | 10.62 | 9.62  | 10.35 | 7.73  | 8.08 |
| 203305_at    | F13A1                 | coagulation factor XIII, A1 polypeptide                                                           | 0.553977 | 4.99  | 4.76  | 4.67 | 6.98  | 5.76  | 9.35  | 8.37  | 8.54  | 6.85  | 7.34 |
| 213649_at    | SFRS7                 | splicing factor, arginine/serine-rich 7, 35kDa                                                    | 0.554419 | 7.38  | 4.39  | 5.57 | 6.36  | 4.83  | 6.63  | 6.22  | 4.4   | 7.78  | 4.56 |
| 205249_at    | EGR2                  | early growth response 2                                                                           | 0.555036 | 7.96  | 6.13  | 6.88 | 7.23  | 7.57  | 6.1   | 9.03  | 6.54  | 9.68  | 5.58 |
| 221342_at    | C6orf25               | chromosome 6 open reading frame 25                                                                | 0.555304 | 4.72  | 4.98  | 5.58 | 5.36  | 5.86  | 8.55  | 6.57  | 7.38  | 5.07  | 5.66 |
| 207474_at    | SNRK                  | SNF related kinase                                                                                | 0.555936 | 7.41  | 4.25  | 3.86 | 5.41  | 4.96  | 5.87  | 6.68  | 3.9   | 7.5   | 5.85 |
| 208861_s_at  | ATRX                  | alpha thalassemia/mental retardation syndrome X-linked (RAD54 homolog, <i>S. cerevisiae</i> )     | 0.555936 | 8.16  | 8.36  | 6.4  | 8.09  | 8.42  | 4.37  | 7.79  | 6.62  | 8.54  | 6.07 |
| 201604_s_at  | PPP1R12A              | protein phosphatase 1, regulatory (inhibitor) subunit 12A                                         | 0.556563 | 8.8   | 8.83  | 6.77 | 9.03  | 8.51  | 6.88  | 9.1   | 8     | 8.53  | 5.88 |
| 229710_at    | ---                   | ---                                                                                               | 0.556563 | 6.73  | 7.13  | 5.56 | 5.49  | 6.93  | 5.07  | 7.26  | 4.97  | 6.89  | 4.58 |
| 208939_at    | SEPHS1                | selenophosphate synthetase 1                                                                      | 0.556619 | 5.17  | 4.63  | 5.97 | 4.1   | 6.65  | 6.2   | 6.56  | 7.32  | 5.31  | 4.82 |
| 242607_at    | ---                   | ---                                                                                               | 0.55854  | 5.83  | 5.62  | 7.87 | 6.12  | 3.44  | 4.56  | 5.26  | 6.99  | 5.69  | 6.58 |
| 243395_at    | ---                   | ---                                                                                               | 0.55854  | 9.81  | 6.94  | 7.65 | 8.39  | 8.37  | 6.71  | 9.8   | 9.01  | 8.28  | 6.03 |
| 208306_x_at  | ---                   | ---                                                                                               | 0.55854  | 7.19  | 10.18 | 9.46 | 9.72  | 9.97  | 11.09 | 10.54 | 10.73 | 9.14  | 9.67 |
| 204670_x_at  | HLA-DRB1 /// HLA-DRB4 | major histocompatibility complex, class II, DR beta 1 /// major histocompatibility                | 0.558695 | 7.4   | 10.08 | 9.32 | 9.16  | 9.41  | 10.98 | 10.23 | 10.61 | 9.07  | 9.29 |
| 203893_at    | TAF9                  | TAF9 RNA polymerase II, TATA box binding protein (TBP)-associated factor, 32kDa                   | 0.558938 | 6     | 6.97  | 5.04 | 6.53  | 6.78  | 6.07  | 6.06  | 7.73  | 4.56  | 7.75 |
| 227917_at    | FAM85A                | family with sequence similarity 85, member A                                                      | 0.558951 | 6.82  | 4.98  | 4.35 | 6.02  | 9.04  | 6.83  | 5.55  | 5.54  | 5.84  | 4.51 |
| 243841_at    | SYNE2                 | spectrin repeat containing, nuclear envelope 2                                                    | 0.558978 | 8.93  | 8.68  | 4.78 | 7.62  | 6.71  | 3.36  | 7.67  | 5.99  | 8.46  | 6.01 |
| 204466_s_at  | SNCA                  | synuclein, alpha (non A4 component of amyloid precursor)                                          | 0.558978 | 6.61  | 5.43  | 3.48 | 6.17  | 5.16  | 8.22  | 6.29  | 7.33  | 4.22  | 5.05 |
| 1557418_at   | ---                   | ---                                                                                               | 0.558978 | 8.12  | 7.38  | 9.73 | 8.22  | 7.55  | 5.04  | 7.25  | 6.34  | 8.75  | 5.65 |
| 1569020_at   | NEDD9                 | neural precursor cell expressed, developmentally down-regulated 9                                 | 0.558978 | 7.27  | 5.52  | 6.54 | 6.12  | 6.19  | 4.67  | 6.61  | 5.78  | 7.42  | 4.35 |
| 204373_s_at  | CEP350                | centrosomal protein 350kDa                                                                        | 0.558978 | 7.82  | 8.4   | 6.15 | 7.91  | 8.1   | 7.14  | 7.34  | 7.2   | 7.67  | 3.42 |
| 1566242_at   | ---                   | ---                                                                                               | 0.558978 | 7.05  | 4.64  | 4.73 | 5.51  | 6.77  | 5.31  | 5.82  | 6.06  | 7.47  | 4.65 |
| 235427_at    | ---                   | ---                                                                                               | 0.558978 | 8.72  | 8.57  | 6.11 | 8.64  | 8.19  | 6.35  | 8.58  | 7.95  | 8.62  | 6.1  |
| 232392_at    | SFRS3                 | Splicing factor, arginine/serine-rich 3                                                           | 0.558978 | 9.07  | 7.77  | 8.72 | 8.75  | 7.79  | 6.73  | 8.65  | 5.5   | 8.46  | 8.13 |
| 228446_at    | KIAA2026              | KIAA2026                                                                                          | 0.560161 | 9.52  | 9.64  | 7.49 | 9.2   | 9.74  | 8.23  | 9.44  | 7.63  | 9.39  | 6.08 |
| 241924_at    | ---                   | ---                                                                                               | 0.560325 | 6.68  | 5.35  | 3.65 | 5.91  | 6.83  | 4.5   | 6.17  | 5.02  | 7.34  | 5.01 |
| 202710_at    | BET1                  | blocked early in transport 1 homolog ( <i>S. cerevisiae</i> )                                     | 0.560915 | 4.95  | 5.56  | 3.38 | 4.07  | 6     | 7.37  | 6.27  | 6.98  | 4.87  | 6.35 |
| 203545_at    | ALG8                  | asparagine-linked glycosylation 8, alpha-1,3-glucosyltransferase homolog ( <i>S. cerevisiae</i> ) | 0.561101 | 4.7   | 4.88  | 7.46 | 5.16  | 5.19  | 6.56  | 4.48  | 6.82  | 5.33  | 6.95 |
| 202435_s_at  | CYP1B1                | cytochrome P450, family 1, subfamily B, polypeptide 1                                             | 0.561148 | 4     | 3.88  | 4    | 5.56  | 4.22  | 7.45  | 6.53  | 7.18  | 6.26  | 5.68 |
| 202887_s_at  | DDIT4                 | DNA-damage-inducible transcript 4                                                                 | 0.561498 | 11.99 | 9.04  | 11.9 | 11.11 | 11.65 | 6.68  | 12.45 | 9.21  | 11.49 | 7.31 |
| 225106_s_at  | OGFOD1                | 2-oxoglutarate and iron-dependent oxygenase domain containing 1                                   | 0.56162  | 6.08  | 3.76  | 6.13 | 6.21  | 7.34  | 4.28  | 6.05  | 4.57  | 5.93  | 4.24 |
| 1554786_at   | CASS4                 | Cas scaffolding protein family member 4                                                           | 0.561903 | 9.35  | 8.34  | 6.7  | 8.67  | 8.23  | 6.33  | 7.97  | 5.04  | 9.34  | 7.5  |
| 238412_at    | LOC100131998          | RRN3 RNA polymerase I transcription factor homolog ( <i>S. cerevisiae</i> ) pseudogene            | 0.561908 | 7.1   | 6.67  | 6.5  | 6.82  | 6.53  | 4.06  | 6.82  | 5.38  | 7.44  | 4.74 |
| 210928_at    | LOC100131613          | PRO1454                                                                                           | 0.562164 | 7.85  | 7.14  | 6.13 | 7.04  | 6.08  | 6.55  | 7.91  | 7.47  | 6.68  | 3.97 |
| 1557158_s_at | MLL3                  | myeloid/lymphoid or mixed-lineage leukemia 3                                                      | 0.562771 | 10.88 | 10.02 | 8.02 | 10.04 | 9.71  | 9.21  | 10.15 | 9.06  | 10.2  | 6.94 |

|             |               |                                                                                  |          |       |       |       |       |       |       |       |       |       |       |
|-------------|---------------|----------------------------------------------------------------------------------|----------|-------|-------|-------|-------|-------|-------|-------|-------|-------|-------|
| 241191_at   | ---           | ---                                                                              | 0.562868 | 7.89  | 5.88  | 4.48  | 7.25  | 4.92  | 3.44  | 6.34  | 4.65  | 6.66  | 4.64  |
| 241462_at   | ---           | ---                                                                              | 0.564438 | 4.64  | 4.87  | 5.96  | 3.83  | 4     | 6.93  | 3.88  | 6.31  | 4.57  | 6.05  |
| 213275_x_at | CTSB          | cathepsin B                                                                      | 0.564947 | 7.92  | 7.66  | 4.73  | 7.5   | 7.72  | 8.96  | 8.98  | 8.22  | 8.58  | 7.99  |
| 235009_at   | BOD1L         | bioorientation of chromosomes in cell division 1-like                            | 0.566784 | 12.4  | 12.2  | 8.33  | 11.79 | 11.92 | 8.86  | 11.99 | 10.49 | 12.27 | 9.36  |
| 209997_x_at | PCM1          | pericentriolar material 1                                                        | 0.566784 | 6.75  | 7.21  | 4.16  | 6.04  | 6.37  | 4.89  | 6.63  | 5.95  | 6.73  | 4.51  |
| 224879_at   | C9orf123      | chromosome 9 open reading frame 123                                              | 0.566784 | 4.75  | 5.72  | 6.64  | 5.21  | 6.95  | 7.57  | 7.03  | 7.16  | 5.13  | 8.67  |
| 213876_x_at | ZRSR2         | zinc finger (CCCH type), RNA-binding motif and serine/arginine rich 2            | 0.566784 | 8.71  | 9.91  | 7.58  | 7.69  | 8.39  | 6.67  | 8.55  | 8.09  | 7.76  | 6.29  |
| 244315_at   | PLSCR1        | phospholipid scramblase 1                                                        | 0.566932 | 6.57  | 5.07  | 6.42  | 7.47  | 5.47  | 4.46  | 6.44  | 4.68  | 7.05  | 5.99  |
| 229155_at   | ---           | ---                                                                              | 0.56706  | 8.01  | 9.92  | 9.53  | 7.11  | 7.24  | 5.63  | 7.71  | 5.41  | 6.87  | 8.3   |
| 1556332_at  | ---           | ---                                                                              | 0.56706  | 7.46  | 7.53  | 5.51  | 7.58  | 6.54  | 4.55  | 5.8   | 5.75  | 7.12  | 4.69  |
| 241341_at   | ---           | ---                                                                              | 0.56706  | 6.66  | 6.01  | 6.07  | 6.62  | 6.71  | 4.41  | 7.31  | 4.72  | 7.24  | 7.38  |
| 202859_x_at | IL8           | interleukin 8                                                                    | 0.567276 | 12.57 | 10.26 | 12.77 | 12.8  | 12.02 | 10.82 | 12.29 | 10.41 | 12.85 | 10.61 |
| 218711_s_at | SDPR          | serum deprivation response (phosphatidylserine binding protein)                  | 0.567647 | 6.49  | 5.65  | 6.39  | 7.58  | 7.03  | 10.19 | 8.79  | 9.73  | 7.42  | 7.18  |
| 204115_at   | GNG11         | guanine nucleotide binding protein (G protein), gamma 11                         | 0.567853 | 5.87  | 4.68  | 6.6   | 6.58  | 6.95  | 11.23 | 8.17  | 9.32  | 6.56  | 7.48  |
| 221616_s_at | TAF9B         | TAF9B RNA polymerase II, TATA box binding protein (TBP)-associated factor, 31kDa | 0.56801  | 6.41  | 4.97  | 5.06  | 5.86  | 6.05  | 4.24  | 5.93  | 6.28  | 5.33  | 8.03  |
| 214414_x_at | HBA1 /// HBA2 | hemoglobin, alpha 1 /// hemoglobin, alpha 2                                      | 0.568087 | 13.03 | 13.22 | 7.79  | 13.08 | 13.03 | 13.68 | 12.43 | 13.56 | 9.55  | 12.68 |
| 237241_at   | ECT2          | Epithelial cell transforming sequence 2 oncogene                                 | 0.568087 | 4.32  | 4.93  | 3.46  | 6.16  | 4.83  | 6.29  | 5.4   | 6.39  | 6.42  | 5.95  |
| 240695_at   | ---           | ---                                                                              | 0.568087 | 8.45  | 7.9   | 7.36  | 8.6   | 7.53  | 5.15  | 7.6   | 6.23  | 8.82  | 5.7   |
| 202806_at   | DBN1          | drebrin 1                                                                        | 0.568087 | 4.8   | 3.9   | 6.62  | 6.05  | 4.67  | 4.57  | 6.74  | 3.98  | 7.16  | 4.24  |
| 211406_at   | IER3IP1       | immediate early response 3 interacting protein 1                                 | 0.568087 | 4.85  | 7.52  | 4.47  | 5.85  | 5.84  | 7.29  | 6.36  | 6.37  | 6.13  | 7.43  |
| 211323_s_at | ITPR1         | inositol 1,4,5-triphosphate receptor, type 1                                     | 0.56811  | 7.2   | 7.3   | 4.71  | 7.01  | 5.74  | 7.14  | 7.82  | 4.45  | 8.03  | 4.98  |
| 225821_s_at | BOD1L         | bioorientation of chromosomes in cell division 1-like                            | 0.56811  | 10.02 | 9.82  | 7.59  | 9.85  | 9.53  | 6.61  | 9.02  | 7.14  | 9.36  | 7.47  |
| 226732_at   | RBM33         | RNA binding motif protein 33                                                     | 0.569371 | 8.97  | 8.29  | 7.74  | 8.84  | 8.69  | 7.57  | 8.84  | 5.84  | 9.48  | 7.05  |
| 206532_at   | ---           | ---                                                                              | 0.569371 | 4.81  | 5.86  | 3.42  | 6.42  | 6.35  | 6.67  | 6.27  | 7.34  | 7.15  | 6.13  |
| 241275_at   | CAPZA1        | Capping protein (actin filament) muscle Z-line, alpha 1                          | 0.569409 | 8.73  | 8.23  | 7.53  | 8.52  | 7.09  | 4.67  | 7.83  | 6.86  | 8.07  | 6.91  |
| 224304_x_at | NIN           | ninein (GSK3B interacting protein)                                               | 0.569476 | 10.53 | 10.36 | 8.43  | 9.66  | 9.58  | 8.2   | 9.62  | 9.41  | 9.72  | 6.81  |
| 216379_x_at | CD24          | CD24 molecule                                                                    | 0.569935 | 4.7   | 6.25  | 6.8   | 6.6   | 7.9   | 8.33  | 7.27  | 9.66  | 7.4   | 8.53  |
| 33323_r_at  | SFN           | stratifin                                                                        | 0.570102 | 8.43  | 8.19  | 5.7   | 8.37  | 7.73  | 3.6   | 7.06  | 3.88  | 9.02  | 3.92  |
| 203569_s_at | OFD1          | oral-facial-digital syndrome 1                                                   | 0.570451 | 7.16  | 6.48  | 6.27  | 7.24  | 6.95  | 4.06  | 6.64  | 5.41  | 7.48  | 7.82  |
| 218805_at   | GIMAP5        | GTPase, IMAP family member 5                                                     | 0.570685 | 6.01  | 5.31  | 5.25  | 5.69  | 7.69  | 7.39  | 8.29  | 6.69  | 7.35  | 6.81  |
| 215646_s_at | VCAN          | versican                                                                         | 0.570854 | 5.04  | 6.93  | 4.35  | 7.85  | 7.94  | 9.27  | 9.96  | 9.25  | 7.05  | 3.45  |
| 217232_x_at | HBB           | hemoglobin, beta                                                                 | 0.571014 | 12.81 | 13.18 | 8.21  | 12.95 | 12.67 | 13.42 | 11.9  | 13.37 | 9.65  | 12.07 |
| 206171_at   | ADORA3        | adenosine A3 receptor                                                            | 0.571014 | 5.77  | 6     | 6.1   | 6.29  | 7.79  | 9.47  | 5.49  | 6.75  | 6.39  | 8.38  |
| 1552787_at  | HELB          | helicase (DNA) B                                                                 | 0.571679 | 6.8   | 7     | 3.35  | 3.94  | 5.66  | 3.72  | 6.66  | 4.07  | 6.58  | 5.43  |
| 1558561_at  | HM13          | histocompatibility (minor) 13                                                    | 0.572457 | 7.23  | 6.51  | 4.91  | 5     | 4.73  | 3.61  | 3.84  | 3.88  | 7.22  | 4.02  |
| 202079_s_at | TRAK1         | trafficking protein, kinesin binding 1                                           | 0.573249 | 6.22  | 6.14  | 7.08  | 6.55  | 6.24  | 4.53  | 5.79  | 5.81  | 5.63  | 3.44  |
| 228151_at   | ---           | ---                                                                              | 0.573274 | 7.21  | 7.95  | 3.37  | 6.53  | 7.42  | 8.07  | 7.85  | 5.9   | 7.52  | 6.86  |
| 1559990_at  | ---           | ---                                                                              | 0.573982 | 9.92  | 10.38 | 11.42 | 11.24 | 10.25 | 7.92  | 9.79  | 10.02 | 9.79  | 7.23  |
| 236527_at   | ---           | ---                                                                              | 0.57438  | 6.03  | 8.07  | 7.31  | 6.62  | 6.05  | 5.37  | 6.8   | 8.15  | 6.06  | 8.15  |
| 211696_x_at | HBB           | hemoglobin, beta                                                                 | 0.574996 | 13.09 | 13.33 | 8.72  | 13.25 | 12.97 | 13.64 | 12.32 | 13.58 | 10.02 | 12.65 |

|             |                     |                                                                                  |          |       |       |      |       |       |       |       |       |       |       |
|-------------|---------------------|----------------------------------------------------------------------------------|----------|-------|-------|------|-------|-------|-------|-------|-------|-------|-------|
| 216191_s_at | TRA@ /// TRD@       | T cell receptor alpha locus /// T cell receptor delta locus                      | 0.575597 | 4.89  | 3.11  | 2.85 | 5.11  | 7.29  | 5.5   | 7.07  | 2.79  | 6.78  | 4.95  |
| 230656_s_at | CIRH1A              | cirrhosis, autosomal recessive 1A (cirhin)                                       | 0.575597 | 5.66  | 5.76  | 5.6  | 6.69  | 4.86  | 7.08  | 5.96  | 5.21  | 3.69  | 8.51  |
| 238669_at   | PTGS1               | prostaglandin-endoperoxide synthase 1 (prostaglandin G/H synthase and cyclooxyge | 0.575597 | 8.02  | 7.95  | 6.17 | 8.46  | 8.72  | 10.68 | 9.84  | 10.44 | 8.64  | 8.8   |
| 238159_at   | ---                 | ---                                                                              | 0.575597 | 6.09  | 5.04  | 3.67 | 5.02  | 5.09  | 4.47  | 6.35  | 4.52  | 6.94  | 6.46  |
| 214054_at   | DOK2                | docking protein 2, 56kDa                                                         | 0.575597 | 5.5   | 6.37  | 5.86 | 5.86  | 6.83  | 9.74  | 6.83  | 7.61  | 6.42  | 8.42  |
| 225585_at   | RAP2A               | RAP2A, member of RAS oncogene family                                             | 0.575597 | 6.71  | 6.56  | 6.27 | 8.33  | 7.95  | 9.29  | 8.8   | 8.69  | 7.02  | 9.22  |
| 230703_at   | ---                 | ---                                                                              | 0.575597 | 8.95  | 6.74  | 8.29 | 8.06  | 6.56  | 7.73  | 7.64  | 4.98  | 8.24  | 8.08  |
| 242945_at   | FAM20A              | family with sequence similarity 20, member A                                     | 0.576007 | 8.08  | 7.87  | 6.8  | 8.81  | 7.45  | 5.23  | 7.47  | 5.47  | 7.93  | 7.39  |
| 201567_s_at | GOLGA4              | golgi autoantigen, golgin subfamily a, 4                                         | 0.576567 | 6.4   | 7.21  | 6.15 | 5.26  | 6.18  | 3.14  | 5.9   | 4.46  | 6.11  | 4.86  |
| 224303_x_at | NIN                 | ninein (GSK3B interacting protein)                                               | 0.57665  | 10.84 | 10.85 | 8.89 | 10.16 | 10.22 | 8.56  | 10.11 | 9.77  | 10.14 | 7.46  |
| 213117_at   | KLHL9               | kelch-like 9 (Drosophila)                                                        | 0.580278 | 5.22  | 5.09  | 6.42 | 5.45  | 5.3   | 6.68  | 5.31  | 5.75  | 5.47  | 8.41  |
| 230535_s_at | ---                 | ---                                                                              | 0.580477 | 5.97  | 4.47  | 5.28 | 7.28  | 6.47  | 10.67 | 8.21  | 8.89  | 6.2   | 8.3   |
| 200869_at   | RPL18A /// RPL18AP3 | ribosomal protein L18a /// ribosomal protein L18a pseudogene                     | 0.580795 | 6.83  | 8.42  | 7.41 | 7.81  | 9.01  | 11.53 | 9.27  | 9.58  | 7.99  | 9.43  |
| 1554929_at  | KIAA0999            | 3 KIAA0999 protein                                                               | 0.581904 | 5.71  | 4.33  | 3.58 | 6.03  | 6.32  | 3.82  | 4.64  | 5.51  | 6.02  | 4.28  |
| 235434_at   | ---                 | ---                                                                              | 0.582182 | 6.2   | 3.51  | 5.68 | 6.07  | 5.73  | 5.69  | 6.07  | 3.48  | 4.47  | 3.56  |
| 209116_x_at | HBB                 | hemoglobin, beta                                                                 | 0.582225 | 13.13 | 13.39 | 8.59 | 13.26 | 12.96 | 13.62 | 12.37 | 13.58 | 10.02 | 12.44 |
| 214000_s_at | RGS10               | Regulator of G-protein signaling 10                                              | 0.582225 | 6     | 5.44  | 5.48 | 6.74  | 6.08  | 9.76  | 7.94  | 7.67  | 6.72  | 7.47  |
| 1566557_at  | FLJ90757            | hypothetical LOC440465                                                           | 0.582225 | 7.15  | 7.36  | 6.86 | 5.67  | 6.72  | 4.81  | 7.19  | 4.62  | 5.41  | 4.86  |
| 202136_at   | ZMYND11             | zinc finger, MYND domain containing 11                                           | 0.582225 | 5.18  | 5.04  | 4.06 | 4.96  | 7.99  | 6.31  | 6.28  | 4.84  | 6.48  | 5.83  |
| 204527_at   | MYO5A               | myosin VA (heavy chain 12, myoxin)                                               | 0.582345 | 6.05  | 5.68  | 3.33 | 6.73  | 6.21  | 3.78  | 5.79  | 4.03  | 6.55  | 3.64  |
| 219844_at   | C10orf118           | chromosome 10 open reading frame 118                                             | 0.582938 | 8.74  | 8.59  | 7.31 | 8.43  | 8.38  | 6.04  | 8.25  | 7.52  | 7.8   | 4.6   |
| 243088_at   | ---                 | ---                                                                              | 0.582938 | 7.26  | 6.32  | 5.64 | 5.78  | 5.62  | 6.37  | 7.64  | 6.03  | 7.51  | 3.77  |
| 219819_s_at | MRPS28              | mitochondrial ribosomal protein S28                                              | 0.583074 | 6.4   | 5.99  | 3.59 | 5.35  | 6.17  | 6.6   | 6.33  | 7.32  | 5.52  | 6.49  |
| 206676_at   | CEACAM8             | carcinoembryonic antigen-related cell adhesion molecule 8                        | 0.583193 | 5.95  | 7.02  | 7.98 | 7.27  | 8.56  | 9.54  | 8.66  | 10.98 | 7.97  | 9.59  |
| 212768_s_at | OLFM4               | olfactomedin 4                                                                   | 0.583679 | 5.51  | 6.1   | 6.76 | 6.15  | 7.27  | 9.28  | 8.16  | 10.74 | 5.88  | 8.34  |
| 228528_at   | ---                 | ---                                                                              | 0.583679 | 8.86  | 8.22  | 5.58 | 7.29  | 6.9   | 5.73  | 8.18  | 6.41  | 8.19  | 7.95  |
| 200790_at   | ODC1                | ornithine decarboxylase 1                                                        | 0.583679 | 6.79  | 7.92  | 4.76 | 7.21  | 6.61  | 9.53  | 8.02  | 8.52  | 6.09  | 6.77  |
| 222186_at   | ZFAND6              | Zinc finger, AN1-type domain 6                                                   | 0.583679 | 6.18  | 3.27  | 3.61 | 6.17  | 4.63  | 3.38  | 5.55  | 5.82  | 4.85  | 6.61  |
| 202960_s_at | MUT                 | methylmalonyl Coenzyme A mutase                                                  | 0.584313 | 5.99  | 6.8   | 4.17 | 5.54  | 5.66  | 7.87  | 6.12  | 7.64  | 5.81  | 6.89  |
| 229419_at   | FBXW7               | F-box and WD repeat domain containing 7                                          | 0.584348 | 8.11  | 8.27  | 7.21 | 7.83  | 8.31  | 5.92  | 8.18  | 8.25  | 8.58  | 4.22  |
| 225147_at   | CYTH3               | cytohesin 3                                                                      | 0.584348 | 6.57  | 5.41  | 5.52 | 5.15  | 7.27  | 4.99  | 8.28  | 6.94  | 6.83  | 7     |
| 204798_at   | MYB                 | v-myb myeloblastosis viral oncogene homolog (avian)                              | 0.584627 | 6.48  | 7.74  | 5.8  | 6.94  | 9.01  | 9.28  | 7.66  | 10.15 | 8.11  | 9.73  |
| 244860_at   | ---                 | ---                                                                              | 0.585489 | 8.72  | 5.99  | 4.23 | 6.52  | 4.63  | 4.91  | 7.7   | 4.72  | 8.32  | 6.23  |
| 209771_x_at | CD24                | CD24 molecule                                                                    | 0.585502 | 4.93  | 6.6   | 7.31 | 6.79  | 8.17  | 8.73  | 7.48  | 9.98  | 7.72  | 8.86  |
| 208651_x_at | CD24                | CD24 molecule                                                                    | 0.586043 | 5.06  | 7.14  | 7.8  | 6.69  | 7.79  | 8.57  | 7.1   | 9.6   | 7.94  | 9.03  |
| 1561167_at  | ---                 | ---                                                                              | 0.586107 | 6.81  | 5.52  | 5    | 5.69  | 4.87  | 3.43  | 6.94  | 5.37  | 6.95  | 7.08  |
| 208010_s_at | PTPN22              | protein tyrosine phosphatase, non-receptor type 22 (lymphoid)                    | 0.58613  | 7.3   | 7.48  | 10.1 | 8.37  | 8.3   | 8.06  | 6.71  | 8.3   | 7.34  | 9.8   |
| 1563975_at  | RNF130              | Ring finger protein 130                                                          | 0.586175 | 8.62  | 8.56  | 5.02 | 7.25  | 7.17  | 5.45  | 7.9   | 6.25  | 8.64  | 4.94  |
| 204057_at   | IRF8                | interferon regulatory factor 8                                                   | 0.586248 | 4.85  | 7.11  | 3.98 | 5.55  | 6.18  | 8.08  | 7.22  | 6.94  | 6.03  | 4.71  |

|              |               |                                                                                  |                                                |                     |          |       |       |       |       |       |       |       |       |      |      |
|--------------|---------------|----------------------------------------------------------------------------------|------------------------------------------------|---------------------|----------|-------|-------|-------|-------|-------|-------|-------|-------|------|------|
| 218422_s_at  | RBM26         | RNA binding motif protein 26                                                     | 0.586248                                       | 7.45                | 7.22     | 4.78  | 6.63  | 7.82  | 4.52  | 7.74  | 6.64  | 7.57  | 6.29  |      |      |
| 202728_s_at  | LTBP1         | latent transforming growth factor beta binding protein 1                         | 0.586248                                       | 6.15                | 5.63     | 5.54  | 5.92  | 6.59  | 8.63  | 7.46  | 7.96  | 6.75  | 7.23  |      |      |
| 230690_at    | TUBB1         | tubulin, beta 1                                                                  | 0.586675                                       | 6.7                 | 5.86     | 6.19  | 8.17  | 7.24  | 11.38 | 9.18  | 10.23 | 7.89  | 8.49  |      |      |
| 214146_s_at  | PPBP          | pro-platelet basic protein (chemokine (C-X-C motif) ligand 7)                    | 0.588219                                       | 7.53                | 6.07     | 8.87  | 10.5  | 9.49  | 13.1  | 11.37 | 12.27 | 10.09 | 11.71 |      |      |
| 201730_s_at  | TPR           | translocated promoter region (to activated MET oncogene)                         | 0.588219                                       | 10.31               | 10.09    | 6.37  | 9.94  | 9.54  | 7.33  | 9.76  | 8.12  | 9.71  | 7.1   |      |      |
|              | ANKRD20A1 /// |                                                                                  |                                                |                     |          |       |       |       |       |       |       |       |       |      |      |
|              | ANKRD20A2 /// |                                                                                  |                                                |                     |          |       |       |       |       |       |       |       |       |      |      |
|              | ANKRD20A3 /// |                                                                                  |                                                |                     |          |       |       |       |       |       |       |       |       |      |      |
|              | ANKRD20A4 /// | C21orf81                                                                         |                                                |                     |          |       |       |       |       |       |       |       |       |      |      |
|              | ///           | LOC100132733 ///                                                                 |                                                |                     |          |       |       |       |       |       |       |       |       |      |      |
|              | LOC284232 /// | LOC643187                                                                        |                                                |                     |          |       |       |       |       |       |       |       |       |      |      |
|              | ///           | LOC647595 ///                                                                    |                                                |                     |          |       |       |       |       |       |       |       |       |      |      |
|              | LOC653436 /// | LOC727770                                                                        | ankyrin repeat domain 20 family, member A1 /// | ankyrin             |          |       |       |       |       |       |       |       |       |      |      |
| 1569607_s_at | ///           | LOC728783                                                                        | repeat domain 20 family,                       | 0.588219            | 4.43     | 2.89  | 2.65  | 2.81  | 6.42  | 7.08  | 4.37  | 3.07  | 6.4   | 2.87 |      |
| 212620_at    | ZNF609        | zinc finger protein 609                                                          | 0.588219                                       | 6.6                 | 6.82     | 5.81  | 6.23  | 6.11  | 6.5   | 7.81  | 4.5   | 7.59  | 4.3   |      |      |
| 239379_at    | LRRFIP1       | Leucine rich repeat (in FLII) interacting protein 1                              | 0.588335                                       | 9.37                | 8.14     | 6.95  | 7.88  | 7.04  | 6.12  | 9.09  | 7.23  | 8.85  | 6.95  |      |      |
| 204748_at    | PTGS2         | prostaglandin-endoperoxide synthase 2 (prostaglandin G/H synthase and cyclooxyge | 0.588878                                       | 12.03               | 10.63    | 11.65 | 11.83 | 12.11 | 9.31  | 12.68 | 10.55 | 13.02 | 10.11 |      |      |
| 213515_x_at  | HBG1 ///      | HBG2                                                                             | hemoglobin, gamma A ///                        | hemoglobin, gamma G | 0.589359 | 8.84  | 9.45  | 4.71  | 8.77  | 8.22  | 9.58  | 8.12  | 8.6   | 5.8  | 7.81 |
| 216621_at    | ---           | ---                                                                              | 0.589359                                       | 7.35                | 5.75     | 3.67  | 6.78  | 6.19  | 4.72  | 7.66  | 4.91  | 7.34  | 4.17  |      |      |
| 232045_at    | PHACTR1       | phosphatase and actin regulator 1                                                | 0.589844                                       | 6.74                | 4.78     | 7.74  | 5.82  | 5.77  | 6.23  | 6.02  | 5.7   | 6.51  | 4.03  |      |      |
| 1554534_at   | DPYD          | dihydropyrimidine dehydrogenase                                                  | 0.589844                                       | 5.91                | 6.12     | 7.07  | 5.81  | 6.85  | 4.9   | 5.26  | 3.62  | 6.22  | 6.56  |      |      |
| 227109_at    | CYP2R1        | cytochrome P450, family 2, subfamily R, polypeptide 1                            | 0.589844                                       | 6.13                | 6.86     | 4.36  | 5.6   | 5.23  | 4.13  | 5.8   | 4.72  | 6.44  | 3.65  |      |      |
| 1566477_at   | ---           | ---                                                                              | 0.589844                                       | 7.88                | 7.88     | 5.31  | 6.32  | 6.3   | 5.39  | 6.35  | 5.76  | 6.7   | 4.97  |      |      |
| 215220_s_at  | TPR           | translocated promoter region (to activated MET oncogene)                         | 0.591918                                       | 10.64               | 10.68    | 6.39  | 9.83  | 10.23 | 7.76  | 10.1  | 8.42  | 10.13 | 6.26  |      |      |
| 204028_s_at  | RABGAP1       | RAB GTPase activating protein 1                                                  | 0.59341                                        | 8.77                | 9.33     | 8.18  | 8     | 8.62  | 8.82  | 9.17  | 9.53  | 9.47  | 6.02  |      |      |
| 238468_at    | TNRC6B        | trinucleotide repeat containing 6B                                               | 0.593433                                       | 9.16                | 9.55     | 7.72  | 9.16  | 9.3   | 6.47  | 8.89  | 7.88  | 9.34  | 7.08  |      |      |
| 239288_at    | TNIK          | TRAF2 and NCK interacting kinase                                                 | 0.594544                                       | 5.28                | 4.01     | 4.65  | 6.45  | 6.53  | 7.35  | 6.57  | 4.48  | 6.82  | 5.02  |      |      |
| 226025_at    | ANKRD28       | ankyrin repeat domain 28                                                         | 0.595959                                       | 5.35                | 5.28     | 5.79  | 7.13  | 6.71  | 8.26  | 8.12  | 7.82  | 7.31  | 6.98  |      |      |
| 212531_at    | LCN2          | lipocalin 2                                                                      | 0.596382                                       | 5.28                | 6.97     | 5.71  | 6.62  | 9.23  | 10.9  | 9.22  | 11.51 | 6.16  | 9     |      |      |
| 202761_s_at  | SYNE2         | spectrin repeat containing, nuclear envelope 2                                   | 0.596382                                       | 8.43                | 8.32     | 2.72  | 6.1   | 6.85  | 2.99  | 6.79  | 3.11  | 7.93  | 4.66  |      |      |
| 1555408_at   | BAGE2 ///     | BAGE4                                                                            | antigen family, member 4                       | 0.597392            | 9.1      | 8.48  | 6.34  | 8.05  | 7.89  | 5.99  | 7.86  | 6.7   | 8.25  | 4.13 |      |
| 233461_x_at  | ZNF226        | zinc finger protein 226                                                          | 0.597486                                       | 7.07                | 8.96     | 5.87  | 6.03  | 7.71  | 5.74  | 7.14  | 5.97  | 6.8   | 5.78  |      |      |
| 206874_s_at  | ---           | ---                                                                              | 0.597486                                       | 7.7                 | 6.61     | 4.88  | 7.79  | 6.67  | 4.96  | 7.11  | 5.88  | 7.99  | 4.99  |      |      |
| 206951_at    | HIST1H4B      | Histone cluster 1, H4b                                                           | 0.597486                                       | 9.07                | 10.3     | 9.5   | 8.74  | 10.1  | 11.22 | 10.76 | 11.77 | 9.71  | 11.48 |      |      |
| 204661_at    | CD52          | CD52 molecule                                                                    | 0.597639                                       | 7.48                | 8.49     | 8.37  | 8.16  | 9.43  | 11.27 | 9.08  | 8.8   | 8.78  | 10.3  |      |      |

|              |         |                                                             |          |       |       |      |       |       |       |       |       |       |       |
|--------------|---------|-------------------------------------------------------------|----------|-------|-------|------|-------|-------|-------|-------|-------|-------|-------|
| 215009_s_at  | SEC31A  | SEC31 homolog A ( <i>S. cerevisiae</i> )                    | 0.598031 | 8.83  | 5.65  | 8.31 | 6.07  | 7.15  | 4.38  | 7.37  | 7.1   | 8.98  | 6.96  |
| 1569192_at   | ---     | ---                                                         | 0.598135 | 5.78  | 5.54  | 3.42 | 5.2   | 3.84  | 4.29  | 6.65  | 4.07  | 6.25  | 6.43  |
| 209146_at    | SC4MOL  | sterol-C4-methyl oxidase-like                               | 0.598138 | 5.02  | 4.79  | 8.04 | 5.97  | 4.8   | 6.02  | 5.46  | 7.4   | 4.96  | 5.65  |
| 238048_at    | CLASP2  | Cytoplasmic linker associated protein 2                     | 0.598138 | 5.71  | 5.8   | 3.59 | 5.47  | 6.22  | 6.72  | 6.35  | 6.28  | 5.87  | 8.81  |
| 232379_at    | SKIL    | SKI-like oncogene                                           | 0.599322 | 9.4   | 7.15  | 9.91 | 9.08  | 8.37  | 5.58  | 8.35  | 6.25  | 7.75  | 6.42  |
| 1557257_at   | BCL10   | B-cell CLL/lymphoma 10                                      | 0.599322 | 7.28  | 6.73  | 7.33 | 6.81  | 6.97  | 5.26  | 7.51  | 5.87  | 5.32  | 4.3   |
| 234640_x_at  | ---     | ---                                                         | 0.599504 | 9.32  | 9.15  | 5.23 | 8.78  | 8.49  | 3.82  | 6.83  | 4.12  | 8.57  | 4.03  |
|              |         | ELOVL family member 5, elongation of long chain fatty acids |          |       |       |      |       |       |       |       |       |       |       |
| 214153_at    | ELOVL5  | (FEN1/Elo2, SUR4/Elo                                        | 0.599504 | 8.87  | 8.14  | 7.42 | 7.64  | 6.69  | 5.28  | 6.89  | 6.06  | 7.58  | 5.86  |
| 223862_at    | GHRL    | ghrelin/obestatin prepropeptide                             | 0.600254 | 7.68  | 6.9   | 8.77 | 7.58  | 7.38  | 7.39  | 7.09  | 3.9   | 7.4   | 6.88  |
| 214617_at    | PRF1    | perforin 1 (pore forming protein)                           | 0.60079  | 7.03  | 5.48  | 3.86 | 8.02  | 9.13  | 7.8   | 9.39  | 4.51  | 9.11  | 7.09  |
| 34210_at     | CD52    | CD52 molecule                                               | 0.6009   | 8.45  | 9.42  | 9.2  | 8.97  | 10.38 | 12.15 | 10.25 | 10.01 | 9.76  | 11.28 |
| 37986_at     | EPOR    | erythropoietin receptor                                     | 0.601911 | 6.12  | 6.1   | 6.55 | 6.96  | 5.72  | 8     | 5.76  | 6.42  | 6.82  | 9.03  |
| 1560109_s_at | ---     | ---                                                         | 0.601969 | 8.21  | 8.38  | 6.07 | 6.93  | 6.1   | 5.5   | 7.13  | 5.25  | 7.74  | 8.12  |
| 218937_at    | ZNF434  | zinc finger protein 434                                     | 0.601969 | 6.36  | 6.38  | 4.12 | 5.19  | 5.94  | 3.84  | 7.28  | 5.53  | 5.92  | 5.73  |
| 233020_at    | ---     | ---                                                         | 0.605156 | 6.9   | 4.7   | 5.58 | 6.98  | 5.69  | 3.73  | 6.99  | 3.07  | 6.41  | 3.97  |
| 202018_s_at  | LTF     | lactotransferrin                                            | 0.605156 | 8.03  | 8.82  | 7.77 | 8.06  | 10.98 | 12.02 | 10.66 | 12.49 | 8.47  | 10.85 |
| 230970_at    | ---     | ---                                                         | 0.605156 | 7.3   | 7.04  | 6.78 | 7.22  | 6.16  | 3.67  | 6.66  | 3.83  | 7.5   | 5.59  |
| 201663_s_at  | SMC4    | structural maintenance of chromosomes 4                     | 0.605185 | 7.56  | 6.1   | 6.39 | 6.8   | 6.27  | 6.86  | 7.05  | 3.69  | 6.52  | 3.55  |
| 220306_at    | FAM46C  | family with sequence similarity 46, member C                | 0.605185 | 7.08  | 6.89  | 7.73 | 8.16  | 7.69  | 9.14  | 8.23  | 5.91  | 7.69  | 5.41  |
| 238829_at    | ---     | ---                                                         | 0.605185 | 7.19  | 5.29  | 5.26 | 6.44  | 6.62  | 3.99  | 7.33  | 4.7   | 6.38  | 5.18  |
|              |         | solute carrier family 2 (facilitated glucose transporter),  |          |       |       |      |       |       |       |       |       |       |       |
|              |         | member 1                                                    |          |       |       |      |       |       |       |       |       |       |       |
| 201250_s_at  | SLC2A1  |                                                             | 0.605452 | 6.72  | 6.39  | 7.71 | 7.81  | 6.65  | 7.75  | 7.69  | 8.35  | 6.6   | 4.79  |
| 1569380_a_at | ---     | ---                                                         | 0.605452 | 6.93  | 4.96  | 7.76 | 6.39  | 5.29  | 5.08  | 5.91  | 4.76  | 5.56  | 4.65  |
| 203496_s_at  | MED1    | mediator complex subunit 1                                  | 0.605868 | 6.97  | 7.32  | 3.75 | 6.07  | 6.26  | 4.73  | 7.24  | 6.14  | 6.83  | 3.74  |
| 229315_at    | ---     | ---                                                         | 0.605868 | 7.47  | 6.88  | 4.97 | 6.44  | 6.6   | 3.73  | 7.59  | 4.32  | 6.94  | 4.42  |
| 203532_x_at  | CUL5    | cullin 5                                                    | 0.605868 | 6     | 7.84  | 4.45 | 5.67  | 4.12  | 7.23  | 5.32  | 5.08  | 5.56  | 5.7   |
| 226300_at    | MED19   | mediator complex subunit 19                                 | 0.605868 | 5.61  | 3.82  | 4.64 | 6.82  | 6.36  | 5.19  | 6.36  | 6.05  | 7.05  | 6.62  |
| 226869_at    | MEGF6   | multiple EGF-like-domains 6                                 | 0.605868 | 6.26  | 5.28  | 4.04 | 5.28  | 6.33  | 3.54  | 6.17  | 3.85  | 5.98  | 5.87  |
| 221211_s_at  | C21orf7 | chromosome 21 open reading frame 7                          | 0.606036 | 5.06  | 2.68  | 6.61 | 7.31  | 7.3   | 11.39 | 8.9   | 9.53  | 6.51  | 7.92  |
|              |         | ribonuclease, RNase A family, 2 (liver, eosinophil-derived  |          |       |       |      |       |       |       |       |       |       |       |
|              |         | neurotoxin)                                                 |          |       |       |      |       |       |       |       |       |       |       |
| 206111_at    | RNASE2  |                                                             | 0.606036 | 8.21  | 9.75  | 7.39 | 5.83  | 9.66  | 10.15 | 8.41  | 10.53 | 9.29  | 10.4  |
| 232150_at    | ---     | ---                                                         | 0.606036 | 6.53  | 5.03  | 7.01 | 7.26  | 7.3   | 5.06  | 5.66  | 5.2   | 7.66  | 6.6   |
| 212785_s_at  | LARP7   | La ribonucleoprotein domain family, member 7                | 0.60614  | 8.6   | 8.66  | 5.37 | 7.99  | 8.42  | 5.86  | 7.96  | 6.37  | 8.19  | 5.73  |
| 215038_s_at  | SETD2   | SET domain containing 2                                     | 0.606507 | 8.25  | 7.92  | 5.75 | 7.42  | 6.99  | 5.22  | 7.63  | 5.98  | 7.64  | 6.1   |
| 218407_x_at  | NENF    | neuron derived neurotrophic factor                          | 0.607425 | 5.26  | 6.36  | 6.12 | 5.98  | 7.15  | 9.55  | 6.93  | 7.58  | 7.38  | 7.42  |
| 222729_at    | FBXW7   | F-box and WD repeat domain containing 7                     | 0.608267 | 8.73  | 7.42  | 7.35 | 8.47  | 8.67  | 6.3   | 8.01  | 7.1   | 8.54  | 4.84  |
| 217951_s_at  | PHF3    | PHD finger protein 3                                        | 0.608267 | 10.44 | 10.32 | 7.95 | 10.23 | 10.25 | 8.94  | 9.81  | 8.47  | 10.29 | 8.11  |
|              |         | chromobox homolog 5 (HP1 alpha homolog, <i>Drosophila</i> ) |          |       |       |      |       |       |       |       |       |       |       |
| 231862_at    | CBX5    |                                                             | 0.608384 | 6.74  | 7.67  | 4.46 | 3.19  | 7.43  | 3.38  | 8.32  | 6.15  | 6.48  | 3.38  |
| 235232_at    | GMEB1   | glucocorticoid modulatory element binding protein 1         | 0.608462 | 7.18  | 7.45  | 4.5  | 6.49  | 7.03  | 4.71  | 7.53  | 6.2   | 7.05  | 3.72  |
| 202677_at    | RASA1   | RAS p21 protein activator (GTPase activating protein) 1     | 0.608481 | 8.78  | 6.55  | 4.98 | 7.7   | 7.43  | 7.53  | 8.24  | 6.96  | 8.82  | 7.23  |
| 208146_s_at  | CPVL    | carboxypeptidase, vitellogenic-like                         | 0.608662 | 4.27  | 6.43  | 5.68 | 6.26  | 7.17  | 8.57  | 9.1   | 9.31  | 5.74  | 4.19  |
| 207018_s_at  | RAB27B  | RAB27B, member RAS oncogene family                          | 0.608662 | 3.9   | 3.62  | 4.74 | 5.53  | 5.06  | 9.82  | 6.27  | 7.97  | 6.55  | 6.18  |

|              |                   |                                                                                                |          |       |       |      |      |      |       |       |       |      |       |
|--------------|-------------------|------------------------------------------------------------------------------------------------|----------|-------|-------|------|------|------|-------|-------|-------|------|-------|
| 228571_at    | RBAK              | RB-associated KRAB zinc finger<br>splicing factor proline/glutamine-rich (polypyrimidine tract | 0.608662 | 5.32  | 5.82  | 3.36 | 5.64 | 6.27 | 3.58  | 5.92  | 6.33  | 7.69 | 3.65  |
| 214016_s_at  | SFPQ              | binding protein ass                                                                            | 0.608662 | 10.27 | 10.28 | 7.15 | 8.31 | 9.41 | 8.94  | 8.98  | 7.39  | 9.78 | 8.65  |
| 208995_s_at  | PPIG              | peptidylprolyl isomerase G (cyclophilin G)                                                     | 0.608662 | 9.41  | 9.44  | 6.24 | 9.26 | 9.19 | 5.76  | 8.54  | 7.59  | 9.02 | 7.73  |
| 205871_at    | PLGLB1 /// PLGLB2 | plasminogen-like B1 /// plasminogen-like B2                                                    | 0.608662 | 6.58  | 4.05  | 4.21 | 6.42 | 3.91 | 4.08  | 4.82  | 5.57  | 6.87 | 5.42  |
| 218769_s_at  | ANKRA2            | ankyrin repeat, family A (RFXANK-like), 2                                                      | 0.609208 | 6.86  | 6.6   | 6.02 | 7.24 | 7.5  | 4.52  | 6.87  | 5.64  | 6.55 | 4.31  |
| 219666_at    | MS4A6A            | membrane-spanning 4-domains, subfamily A, member 6A                                            | 0.609476 | 6.19  | 5.8   | 7.58 | 7.56 | 7.87 | 9.92  | 8.6   | 8.26  | 7.48 | 7.71  |
| 231205_at    | ---               | ---                                                                                            | 0.609476 | 6.11  | 3.62  | 6.31 | 5.94 | 3.81 | 5.09  | 7.17  | 4.51  | 6.26 | 7.71  |
| 202555_s_at  | MYLK              | myosin light chain kinase                                                                      | 0.609476 | 5.89  | 5.12  | 6.38 | 6.43 | 5.38 | 9.72  | 7.6   | 8.05  | 6.44 | 6.89  |
| 203414_at    | MMD               | monocyte to macrophage differentiation-associated                                              | 0.609792 | 6.97  | 6.5   | 7.11 | 9.03 | 8.86 | 12.06 | 10.66 | 11.48 | 9.02 | 10.07 |
| 235307_at    | LMTK2             | lemur tyrosine kinase 2                                                                        | 0.609792 | 9.5   | 9.47  | 9.15 | 8.17 | 8.35 | 7.07  | 9.32  | 7.27  | 8.19 | 6.86  |
| 221768_at    | SFPQ              | Splicing factor proline/glutamine-rich (polypyrimidine tract<br>binding protein ass            | 0.609806 | 7.73  | 6.67  | 7.4  | 7.15 | 6.91 | 3.27  | 7.17  | 4.66  | 7.43 | 8.36  |
| 212828_at    | SYNJ2             | synaptojanin 2                                                                                 | 0.610603 | 6.23  | 6.12  | 5.08 | 3.61 | 5.11 | 3.76  | 6.41  | 7.74  | 5.37 | 5.93  |
| 1554306_at   | ITPKB             | inositol 1,4,5-trisphosphate 3-kinase B                                                        | 0.610603 | 7.16  | 5.48  | 3.32 | 5.59 | 6.85 | 4.72  | 6.25  | 3.83  | 6.24 | 4.27  |
| 233228_at    | ---               | ---                                                                                            | 0.610603 | 5.59  | 2.36  | 5.11 | 6.36 | 5.59 | 3.5   | 6.54  | 3.42  | 7.66 | 7.12  |
| 37145_at     | GNLY              | granulysin                                                                                     | 0.610707 | 6.91  | 7.46  | 4.89 | 7.26 | 7.14 | 5.37  | 8.24  | 6.4   | 8.08 | 6.47  |
| 228514_at    | GFER              | Growth factor, augmenter of liver regeneration                                                 | 0.611114 | 4.34  | 5.23  | 4.34 | 5.78 | 5.34 | 7.13  | 6.16  | 4.86  | 4.67 | 8.29  |
| 1565566_a_at | ---               | ---                                                                                            | 0.611175 | 6.08  | 7.63  | 6.81 | 7.19 | 5.42 | 7.78  | 5.75  | 6     | 6.46 | 8.9   |
| 213546_at    | DKFZP586I1420     | hypothetical protein DKFZp586I1420                                                             | 0.611361 | 7.28  | 6.28  | 4.99 | 6.32 | 6.74 | 3.76  | 6.79  | 5.78  | 6.2  | 5.24  |
| 239897_at    | BCLAF1            | BCL2-associated transcription factor 1                                                         | 0.611953 | 7.55  | 7.9   | 5.57 | 7.77 | 7.17 | 5.99  | 6.89  | 3.19  | 7.79 | 6.53  |
| 1555659_a_at | TREML1            | triggering receptor expressed on myeloid cells-like 1                                          | 0.611953 | 6.03  | 5.55  | 5.86 | 5.87 | 5.89 | 9.33  | 7.18  | 7.28  | 6.03 | 6.3   |
| 230444_at    | ---               | ---                                                                                            | 0.611953 | 6.39  | 7.38  | 5.88 | 6.47 | 8.02 | 5.06  | 7.48  | 5.92  | 7.55 | 4.94  |
| 228394_at    | STK10             | serine/threonine kinase 10                                                                     | 0.611953 | 8.92  | 9.42  | 8.85 | 8.9  | 9.27 | 7.08  | 8.47  | 8.15  | 8.24 | 5.47  |
| 224082_at    | ---               | ---                                                                                            | 0.612324 | 7.11  | 7.53  | 5.49 | 6.31 | 5.97 | 4.66  | 7.53  | 4.8   | 7.02 | 6.2   |
| 1555372_at   | BCL2L11           | BCL2-like 11 (apoptosis facilitator)                                                           | 0.612471 | 6.48  | 6.27  | 3.21 | 6.24 | 5.57 | 7.23  | 5.36  | 4.22  | 6.11 | 3.79  |
| 1569105_at   | SETD5             | SET domain containing 5                                                                        | 0.612471 | 7.48  | 6.02  | 4.8  | 6.62 | 5.86 | 4.73  | 4.51  | 5.08  | 7.53 | 5.61  |
| 233705_at    | ---               | ---                                                                                            | 0.61315  | 6.69  | 4.09  | 5.96 | 7.23 | 4.69 | 3.43  | 6.3   | 3.72  | 5.94 | 6.34  |
| 218026_at    | CCDC56            | coiled-coil domain containing 56                                                               | 0.61315  | 5.64  | 6.23  | 4.43 | 5.79 | 6    | 7.52  | 6.28  | 7.92  | 5.45 | 6.87  |
| 227792_at    | ITPRIPL2          | inositol 1,4,5-triphosphate receptor interacting protein-like 2                                | 0.613925 | 5     | 4.54  | 4.39 | 4.41 | 5.14 | 7.98  | 6.97  | 7.24  | 5.16 | 4.86  |
| 218406_x_at  | NENF              | neuron derived neurotrophic factor<br>heterogeneous nuclear ribonucleoprotein U (scaffold      | 0.613925 | 5.31  | 6.33  | 5.11 | 5.25 | 6.78 | 8.65  | 6.31  | 6.66  | 6.77 | 6.32  |
| 235603_at    | HNRNPU            | attachment factor A)                                                                           | 0.613989 | 6.08  | 4.6   | 4.26 | 5.81 | 6.09 | 5.67  | 6.39  | 5.72  | 6.71 | 3.16  |
| 208894_at    | HLA-DRA           | major histocompatibility complex, class II, DR alpha                                           | 0.614415 | 7.45  | 9.87  | 9.32 | 9.16 | 9.21 | 11.42 | 9.94  | 10.48 | 9.58 | 9.73  |
| 242794_at    | MAML3             | mastermind-like 3 (Drosophila)                                                                 | 0.614456 | 8.08  | 8.77  | 6.95 | 8.54 | 7.49 | 6.5   | 8.32  | 7.1   | 8.3  | 5.56  |
| 218435_at    | DNAJC15           | DnaJ (Hsp40) homolog, subfamily C, member 15                                                   | 0.615513 | 5.95  | 6.78  | 4.96 | 6.78 | 7.42 | 8.94  | 7.92  | 7.45  | 5.98 | 8.3   |
| 235276_at    | EPSTI1            | Epithelial stromal interaction 1 (breast)                                                      | 0.61618  | 4.66  | 4.35  | 6.84 | 7.47 | 7.09 | 5.67  | 6.01  | 5     | 6.7  | 4.69  |
| 225354_s_at  | SH3BGR12          | SH3 domain binding glutamic acid-rich protein like 2                                           | 0.616424 | 4.2   | 3.35  | 4.69 | 5.2  | 5.26 | 8.22  | 6.41  | 7.23  | 4.61 | 3.83  |
| 60794_f_at   | ZNF814            | zinc finger protein 814                                                                        | 0.617401 | 8.35  | 7.48  | 6.96 | 7.92 | 7.38 | 4.57  | 6.61  | 6.16  | 8.28 | 6.37  |
| 243233_at    | ---               | ---                                                                                            | 0.617794 | 7.85  | 5.35  | 4.84 | 6.43 | 6.68 | 6.26  | 6.91  | 4.95  | 8.4  | 6.47  |
| 206698_at    | XK                | X-linked Kx blood group (McLeod syndrome)                                                      | 0.617985 | 4.96  | 5.23  | 4    | 4.34 | 5.88 | 7.35  | 5.62  | 7.26  | 6.22 | 7.45  |
| 209895_at    | PTPN11            | protein tyrosine phosphatase, non-receptor type 11                                             | 0.61814  | 7.61  | 7.36  | 6.52 | 7.05 | 7.01 | 5.68  | 7.17  | 4.32  | 5.89 | 5.04  |



|              |                        |                                                                                                                           |          |      |      |      |      |      |       |      |      |      |       |
|--------------|------------------------|---------------------------------------------------------------------------------------------------------------------------|----------|------|------|------|------|------|-------|------|------|------|-------|
| 212493_s_at  | SETD2                  | SET domain containing 2                                                                                                   | 0.618806 | 8.57 | 8.15 | 6.46 | 8.42 | 7.29 | 6.43  | 7.46 | 6.05 | 8.71 | 4.06  |
| 201024_x_at  | EIF5B                  | eukaryotic translation initiation factor 5B                                                                               | 0.619124 | 8.86 | 8.85 | 4.39 | 8.23 | 9.52 | 6.87  | 9.56 | 7.94 | 8.85 | 4.66  |
| 1557261_at   | WHAMML1 ///<br>WHAMML2 | WAS protein homolog associated with actin, golgi membranes<br>and microtubules-like                                       | 0.619124 | 3.47 | 3.48 | 3.48 | 5.12 | 3.63 | 7.39  | 6.31 | 7.3  | 3.36 | 3.64  |
| 231418_at    | ---                    | ---                                                                                                                       | 0.619124 | 4.03 | 7.95 | 3.19 | 4.5  | 4.94 | 6.02  | 5.38 | 5.23 | 6.02 | 4.67  |
| 200002_at    | RPL35                  | ribosomal protein L35                                                                                                     | 0.619723 | 7.62 | 8.92 | 8.17 | 8.33 | 8.93 | 11.1  | 9.95 | 9.36 | 8.59 | 10.62 |
| 207181_s_at  | CASP7                  | caspase 7, apoptosis-related cysteine peptidase                                                                           | 0.620077 | 5.09 | 6.13 | 3.94 | 4.92 | 5.72 | 7.31  | 5.92 | 6.9  | 4.48 | 4.3   |
| 229069_at    | SARNP                  | SAP domain containing ribonucleoprotein                                                                                   | 0.620138 | 7.15 | 7.06 | 7.11 | 6.63 | 6.66 | 5.93  | 7.2  | 4.09 | 7.37 | 8.75  |
| 204628_s_at  | ITGB3                  | integrin, beta 3 (platelet glycoprotein IIIa, antigen CD61)                                                               | 0.620138 | 6.28 | 5.93 | 6.9  | 7.32 | 7.01 | 10.24 | 9.08 | 9.66 | 7.99 | 8.56  |
| 1556551_s_at | SLC39A6                | solute carrier family 39 (zinc transporter), member 6<br>major histocompatibility complex, class II, DQ alpha 1 /// major | 0.620138 | 6.51 | 6.42 | 5.52 | 7.48 | 7.4  | 4.99  | 6.71 | 6.43 | 6.65 | 4.15  |
| 212671_s_at  | HLA-DQA1 /// HLA-DQA2  | histocompatibil<br>asparagine-linked glycosylation 2, alpha-1,3-                                                          | 0.621349 | 5.05 | 8.29 | 4.06 | 6.33 | 7.83 | 9.35  | 8.06 | 8.14 | 6.3  | 6.39  |
| 225621_at    | ALG2                   | mannosyltransferase homolog (S. cer                                                                                       | 0.621977 | 5.56 | 7.3  | 4.41 | 5.9  | 6.65 | 7.14  | 6.59 | 7.22 | 5.77 | 4.87  |
| 201847_at    | LIPA                   | lipase A, lysosomal acid, cholesterol esterase                                                                            | 0.62224  | 4.62 | 5.45 | 5.22 | 5.25 | 6.56 | 7.91  | 7.5  | 7.32 | 6.11 | 5.94  |
| 224906_at    | ANO6                   | anoctamin 6                                                                                                               | 0.622242 | 5.16 | 4.92 | 4.75 | 5.44 | 6.88 | 7.28  | 6.95 | 7.28 | 5.5  | 6.68  |
| 236889_at    | ---                    | ---                                                                                                                       | 0.622242 | 7.5  | 5.29 | 5.99 | 6.7  | 5.32 | 5.05  | 7.37 | 4.98 | 7.21 | 4.55  |
| 243819_at    | ---                    | ---                                                                                                                       | 0.622269 | 8.4  | 4.92 | 7.7  | 7.31 | 5.41 | 6.24  | 7.68 | 7.31 | 7.7  | 5.78  |
| 220735_s_at  | SENP7                  | SUMO1/sentrin specific peptidase 7<br>junctional adhesion molecule 3 /// hypothetical protein                             | 0.62269  | 6.88 | 6.79 | 6.87 | 6.5  | 6.91 | 5.07  | 6.9  | 3.93 | 6.11 | 4.54  |
| 212813_at    | JAM3 /// LOC100133502  | LOC100133502                                                                                                              | 0.622784 | 4.13 | 3.71 | 4.92 | 4.96 | 4.02 | 7.92  | 6.29 | 7.2  | 5.41 | 4.05  |
| 216867_s_at  | PDGFA                  | platelet-derived growth factor alpha polypeptide<br>serum deprivation response (phosphatidylserine binding                | 0.624871 | 4.38 | 3.57 | 5.4  | 5.31 | 5.9  | 8.22  | 7.46 | 7.69 | 6.16 | 6.84  |
| 222717_at    | SDPR                   | protein)                                                                                                                  | 0.624924 | 4.11 | 2.32 | 4.29 | 6.45 | 6.11 | 9.65  | 8.26 | 8.98 | 6.29 | 6.66  |
| 220305_at    | MAVS                   | mitochondrial antiviral signaling protein                                                                                 | 0.624924 | 6.43 | 7.48 | 5.35 | 5.58 | 5.96 | 4.75  | 7.5  | 5.86 | 6.41 | 4.42  |
| 224823_at    | MYLK                   | myosin light chain kinase                                                                                                 | 0.625063 | 4.26 | 4.29 | 4.98 | 4.85 | 5.66 | 8.44  | 6.65 | 6.7  | 4.9  | 5.38  |
| 211990_at    | HLA-DPA1               | major histocompatibility complex, class II, DP alpha 1                                                                    | 0.625539 | 4.3  | 8.82 | 8.3  | 7.09 | 8.12 | 10.72 | 9.02 | 8.98 | 6.3  | 4.47  |
| 215111_s_at  | TSC22D1                | TSC22 domain family, member 1                                                                                             | 0.625539 | 5.64 | 4.67 | 6.16 | 6.78 | 7.51 | 10.46 | 8.15 | 8.82 | 6.52 | 6.69  |
| 241003_at    | ---                    | ---                                                                                                                       | 0.625539 | 6.76 | 7.18 | 8.83 | 6.59 | 5.54 | 6.12  | 5.36 | 7.56 | 7.16 | 9.06  |
| 217771_at    | GOLM1                  | golgi membrane protein 1                                                                                                  | 0.625775 | 5.13 | 6.3  | 5.26 | 6.13 | 5.77 | 7.29  | 7.33 | 8.41 | 6    | 4.26  |
| 244677_at    | ---                    | ---                                                                                                                       | 0.626062 | 8.44 | 4.5  | 8.1  | 5.23 | 5.88 | 5.92  | 6.84 | 7.33 | 8.41 | 6.25  |
| 201996_s_at  | SPEN                   | spen homolog, transcriptional regulator (Drosophila)                                                                      | 0.626062 | 9.68 | 9    | 7.46 | 8.89 | 8.6  | 6.9   | 8.31 | 7.86 | 9.4  | 6.34  |
| 223850_at    | ---                    | ---                                                                                                                       | 0.626542 | 7.28 | 4.47 | 7.26 | 6.86 | 5.91 | 5.11  | 3.86 | 5.75 | 6.32 | 5.84  |
| 235810_at    | ZNF182                 | zinc finger protein 182                                                                                                   | 0.626945 | 6.64 | 6.47 | 4.04 | 5.48 | 7.17 | 4.27  | 6.74 | 5.94 | 6.73 | 4.36  |
| 243701_at    | ---                    | ---                                                                                                                       | 0.627178 | 3.41 | 4.2  | 5.68 | 6.07 | 4.93 | 7.03  | 4.05 | 6.43 | 4.3  | 7.84  |
| 238502_at    | ---                    | ---                                                                                                                       | 0.627178 | 7.47 | 4.46 | 5.8  | 5    | 5.46 | 4.74  | 5.62 | 6.27 | 6.53 | 4.09  |
| 1569076_a_at | ZNF836                 | zinc finger protein 836                                                                                                   | 0.62765  | 6.27 | 7.33 | 3.55 | 5.31 | 7.28 | 6.23  | 7.22 | 5.51 | 6.05 | 5.87  |
| 204626_s_at  | ITGB3                  | integrin, beta 3 (platelet glycoprotein IIIa, antigen CD61)                                                               | 0.627967 | 5.81 | 5.07 | 6.56 | 7.36 | 6.82 | 10.86 | 9.04 | 10.4 | 8.48 | 9.12  |
| 222139_at    | KIAA1466               | KIAA1466 gene                                                                                                             | 0.627967 | 6.73 | 5.85 | 3.28 | 6.19 | 4.37 | 2.75  | 6.78 | 3.48 | 4.08 | 2.77  |
| 212723_at    | JMJD6                  | jumonji domain containing 6                                                                                               | 0.627967 | 9.68 | 8.26 | 9.98 | 9.72 | 8.04 | 7.56  | 8.47 | 6.61 | 8.4  | 6.4   |
| 221802_s_at  | KIAA1598               | KIAA1598                                                                                                                  | 0.628857 | 3.43 | 5.69 | 2.93 | 3.68 | 5.59 | 6.74  | 7.74 | 7.44 | 4.43 | 3.43  |
| 220094_s_at  | CCDC90A                | coiled-coil domain containing 90A                                                                                         | 0.628857 | 4.54 | 5.25 | 3.53 | 4.55 | 6.61 | 8.63  | 6.95 | 7.82 | 6.27 | 4.05  |

|              |                    |                                                                                  |          |       |       |      |      |      |       |      |       |      |       |
|--------------|--------------------|----------------------------------------------------------------------------------|----------|-------|-------|------|------|------|-------|------|-------|------|-------|
| 1558710_at   | ---                | ---                                                                              | 0.629545 | 6.3   | 3.64  | 6.19 | 6.65 | 3.54 | 3.51  | 4.48 | 3.65  | 4.64 | 4.91  |
| 240798_at    | ---                | ---                                                                              | 0.629651 | 6.12  | 5.74  | 4.04 | 6.39 | 6.82 | 4.31  | 5.72 | 5.59  | 4.94 | 3.7   |
| 209306_s_at  | SWAP70             | SWAP-70 protein                                                                  | 0.629818 | 6.96  | 8.13  | 4.2  | 5.63 | 6.96 | 6.97  | 6    | 7.82  | 6.38 | 6.36  |
| 1557236_at   | APOL6              | apolipoprotein L, 6                                                              | 0.629876 | 7.5   | 7.52  | 8.58 | 9.76 | 7.98 | 6.3   | 6.85 | 6.72  | 8.69 | 7.45  |
| 229531_at    | ---                | ---                                                                              | 0.630445 | 7.53  | 7.71  | 5.01 | 6.69 | 8.48 | 5.14  | 7.13 | 5.72  | 6.68 | 5.51  |
| 213074_at    | PHIP               | pleckstrin homology domain interacting protein                                   | 0.630581 | 7.9   | 7.35  | 4.8  | 7.26 | 8.13 | 6.11  | 8.45 | 6.77  | 7.59 | 6.69  |
| 206115_at    | EGR3               | early growth response 3                                                          | 0.630939 | 9.05  | 3.65  | 8.04 | 8.72 | 7.18 | 5.43  | 9.24 | 6.75  | 9.84 | 3.23  |
| 242323_at    | PLA2G12A           | phospholipase A2, group XIIA                                                     | 0.63123  | 4.37  | 4.04  | 4.46 | 4.63 | 5.3  | 7.03  | 6.91 | 6.09  | 5.14 | 6.65  |
| 234632_x_at  | ---                | ---                                                                              | 0.631503 | 9.6   | 9.63  | 3.53 | 9.37 | 8.53 | 3.32  | 6.6  | 3.07  | 9.12 | 3.64  |
| 205798_at    | IL7R               | interleukin 7 receptor                                                           | 0.631831 | 6.66  | 3.75  | 4.36 | 6.76 | 6.72 | 4.42  | 8.3  | 4.01  | 6.02 | 5.98  |
| 218622_at    | NUP37              | nucleoporin 37kDa                                                                | 0.631831 | 5.18  | 6.48  | 3.98 | 3.89 | 5.88 | 6.17  | 5.49 | 6.61  | 3.97 | 5.53  |
| 206493_at    | ITGA2B             | integrin, alpha 2b (platelet glycoprotein IIb of IIb/IIIa complex, antigen CD41) | 0.632348 | 6.95  | 7.17  | 7.41 | 7.16 | 8.49 | 11.19 | 9.76 | 11.05 | 8.59 | 9.18  |
| 213673_x_at  | NENF               | Neuron derived neurotrophic factor                                               | 0.632835 | 4.7   | 5.82  | 4.11 | 4.8  | 6.59 | 8.48  | 6.13 | 6.41  | 6.34 | 6.41  |
| 217963_s_at  | NGFRAP1            | nerve growth factor receptor (TNFRSF16) associated protein 1                     | 0.632903 | 5.33  | 5     | 4.66 | 6.09 | 5.68 | 9.64  | 8.21 | 9.03  | 5.91 | 7.81  |
| 217952_x_at  | PHF3               | PHD finger protein 3                                                             | 0.632903 | 10.43 | 10.58 | 6.93 | 9.83 | 9.83 | 8.5   | 10   | 9.03  | 9.87 | 7.08  |
| 209259_s_at  | SMC3               | structural maintenance of chromosomes 3                                          | 0.632903 | 8.23  | 8.89  | 5.94 | 7.64 | 8.7  | 7.2   | 8.06 | 7.17  | 7.96 | 5.68  |
| 212058_at    | SR140              | U2-associated SR140 protein                                                      | 0.632903 | 7.55  | 7.23  | 7.94 | 7.56 | 6.86 | 6.79  | 6.45 | 5.96  | 7.93 | 4.56  |
| 207630_s_at  | CREM               | cAMP responsive element modulator                                                | 0.632954 | 7.7   | 6.29  | 7.11 | 7.71 | 6.05 | 4.8   | 7.78 | 6     | 7.76 | 5.72  |
| 244523_at    | MMD                | monocyte to macrophage differentiation-associated                                | 0.632954 | 3.88  | 3.06  | 3.65 | 3.77 | 2.73 | 6.56  | 6.22 | 6.73  | 3.27 | 5.93  |
| 1557081_at   | RBM25              | RNA binding motif protein 25                                                     | 0.632954 | 7.49  | 7.11  | 3.93 | 5.68 | 5.86 | 4.44  | 7.41 | 5.47  | 7.58 | 5.57  |
| 202642_s_at  | TRRAP              | transformation/transcription domain-associated protein                           | 0.632954 | 5.83  | 6.68  | 3.78 | 5.79 | 6.34 | 3.53  | 6.13 | 5.93  | 5.64 | 4.88  |
| 1559822_s_at | LOC644215 /// MTDH | hypothetical LOC644215 /// metadherin                                            | 0.632954 | 6.11  | 6.62  | 4.94 | 5.93 | 6.07 | 4.43  | 7.63 | 6.69  | 5.79 | 3.34  |
| 200834_s_at  | RPS21              | ribosomal protein S21                                                            | 0.632954 | 7.72  | 8.27  | 8.94 | 8.71 | 9.05 | 11.12 | 9.72 | 10.4  | 8.61 | 10.49 |
| 201143_s_at  | EIF2S1             | eukaryotic translation initiation factor 2, subunit 1 alpha, 35kDa               | 0.633672 | 6.52  | 5.68  | 5    | 6.71 | 6.67 | 6.05  | 6.89 | 8.28  | 6.12 | 8.27  |
| 1554512_a_at | CCDC123            | coiled-coil domain containing 123                                                | 0.63386  | 3.83  | 6.18  | 3.91 | 4.08 | 5.85 | 4.02  | 6.03 | 5.1   | 5.61 | 7.12  |
| 266_s_at     | CD24               | CD24 molecule                                                                    | 0.634162 | 3.42  | 4.85  | 6.02 | 5.35 | 6.97 | 7.74  | 6.5  | 9.21  | 6.26 | 7.6   |
| 1555351_s_at | PPHLN1             | periphilin 1                                                                     | 0.634162 | 7.68  | 7.39  | 4.76 | 7.18 | 7.83 | 3.57  | 6.28 | 7.88  | 7.18 | 6.48  |
| 202546_at    | VAMP8              | vesicle-associated membrane protein 8 (endobrevin)                               | 0.634162 | 7     | 7.78  | 6.92 | 7.07 | 8.46 | 10.19 | 9.4  | 9.75  | 6.8  | 8.19  |
| 1562894_at   | ---                | ---                                                                              | 0.634162 | 7.22  | 6.12  | 4.44 | 6.58 | 5.53 | 4.97  | 6.41 | 3.33  | 5.95 | 6.13  |
| 1554057_at   | LOC645676          | hypothetical LOC645676                                                           | 0.634162 | 7.1   | 5.93  | 7.63 | 5.73 | 4.4  | 4.69  | 6.29 | 3.29  | 6.49 | 6.66  |
| 239314_at    | NHLRC3             | NHL repeat containing 3                                                          | 0.634162 | 5.5   | 4.73  | 4.39 | 5.13 | 6.01 | 7.4   | 6.94 | 6.4   | 3.91 | 5.39  |
| 239393_at    | ---                | ---                                                                              | 0.634162 | 6.79  | 6.5   | 5.5  | 5.84 | 5.02 | 3.99  | 5.81 | 3.75  | 6.83 | 5.16  |
| 243164_s_at  | ---                | ---                                                                              | 0.634708 | 7.46  | 5.98  | 5.42 | 6.96 | 5.22 | 3.47  | 7.43 | 6.13  | 7.15 | 4.18  |
| 243934_at    | ODF3B              | Outer dense fiber of sperm tails 3B                                              | 0.635106 | 6.06  | 5.57  | 8.17 | 6.98 | 4.75 | 7.6   | 6.01 | 8.29  | 8.04 | 8.32  |
| 211747_s_at  | LSM5               | LSM5 homolog, U6 small nuclear RNA associated (S. cerevisiae)                    | 0.635106 | 6.2   | 6.11  | 4.41 | 5.25 | 5.99 | 7.35  | 7.41 | 7.83  | 5.27 | 7.91  |
| 239490_at    | C7orf44            | chromosome 7 open reading frame 44                                               | 0.635106 | 7.4   | 5.92  | 7.11 | 6.16 | 4.92 | 4.17  | 6.06 | 4.52  | 5.3  | 5.87  |
| 1554049_s_at | WDR42A             | WD repeat domain 42A                                                             | 0.635106 | 5.06  | 4.17  | 4.37 | 4.91 | 6.35 | 3.44  | 4.12 | 6.18  | 6.54 | 4.47  |
| 214970_s_at  | ST6GAL1            | ST6 beta-galactosamide alpha-2,6-sialyltransferase 1                             | 0.635409 | 5.75  | 6.8   | 4.48 | 5.32 | 4.86 | 4.03  | 5    | 6.63  | 5.21 | 7.06  |
| 234260_at    | ---                | ---                                                                              | 0.636316 | 6.59  | 5.55  | 6.26 | 6.31 | 5.32 | 4.38  | 4.95 | 2.47  | 4.77 | 4.67  |

|              |                                 |                                                                                                                    |          |       |       |       |       |       |       |       |       |       |       |
|--------------|---------------------------------|--------------------------------------------------------------------------------------------------------------------|----------|-------|-------|-------|-------|-------|-------|-------|-------|-------|-------|
| 231688_at    | MMP8                            | matrix metalloproteinase 8 (neutrophil collagenase)                                                                | 0.636551 | 5.12  | 5.22  | 6.04  | 4.39  | 7.22  | 8.05  | 7.18  | 9.65  | 4.67  | 6.04  |
| 205382_s_at  | CFD                             | complement factor D (adipsin)                                                                                      | 0.63671  | 10.12 | 10.39 | 8.51  | 8.24  | 10.74 | 11.13 | 7.05  | 7.87  | 7.63  | 9.05  |
| 211684_s_at  | DYNC112                         | dynein, cytoplasmic 1, intermediate chain 2                                                                        | 0.63671  | 4.39  | 5.66  | 2.81  | 5.53  | 6.35  | 7.11  | 7.34  | 7.16  | 5.47  | 6.57  |
| 215109_at    | ---                             | ---                                                                                                                | 0.63671  | 7.62  | 5.79  | 6.49  | 7.38  | 5.45  | 3.78  | 6.17  | 7.54  | 7.08  | 7.76  |
| 1554997_a_at | PTGS2                           | prostaglandin-endoperoxide synthase 2 (prostaglandin G/H synthase and cyclooxygenase)                              | 0.63671  | 10.69 | 8.6   | 10.68 | 10.51 | 10.78 | 8.56  | 11.68 | 8.86  | 11.97 | 7.99  |
| 206697_s_at  | HP /// HPR                      | haptoglobin /// haptoglobin-related protein                                                                        | 0.63671  | 6.96  | 7.02  | 6.79  | 6.21  | 8.06  | 8.77  | 8.31  | 9.62  | 5.8   | 6.92  |
| 201406_at    | HNRNP2 /// RPL36A /// RPL36AP37 | heterogeneous nuclear ribonucleoprotein H2 (H') /// ribosomal protein L36a /// r                                   | 0.63671  | 8.42  | 9.23  | 9.41  | 9.73  | 9.91  | 12.28 | 9.79  | 9.85  | 8.71  | 10.06 |
| 238465_at    | C5orf35                         | chromosome 5 open reading frame 35                                                                                 | 0.636748 | 4.6   | 4.67  | 7.15  | 6.11  | 6.67  | 7.52  | 5.73  | 5.2   | 4.82  | 5.91  |
| 236985_at    | ---                             | ---                                                                                                                | 0.637402 | 7.1   | 5.93  | 7.28  | 4.96  | 4.69  | 4.05  | 5.81  | 7.38  | 5.7   | 4.12  |
| 224345_x_at  | FAM162A                         | family with sequence similarity 162, member A                                                                      | 0.637402 | 5.69  | 5.51  | 5.33  | 4.72  | 4.64  | 7.79  | 5.91  | 6.65  | 5.92  | 7.33  |
| 236488_s_at  | ---                             | ---                                                                                                                | 0.637505 | 7.41  | 7.33  | 6.68  | 6.83  | 8.55  | 10.8  | 9.16  | 9.69  | 7.36  | 7.1   |
| 235786_at    | ---                             | ---                                                                                                                | 0.637746 | 6.33  | 4.69  | 3.96  | 7.01  | 5.48  | 3.61  | 6.34  | 4.64  | 6.99  | 3.65  |
| 204512_at    | HIVEP1                          | human immunodeficiency virus type I enhancer binding protein 1                                                     | 0.637803 | 7.76  | 7.27  | 4.44  | 7.02  | 6.7   | 4.92  | 7.23  | 5     | 7.73  | 6.41  |
| 205081_at    | CRIP1                           | cysteine-rich protein 1 (intestinal)                                                                               | 0.637803 | 5.47  | 5.25  | 6.05  | 6.21  | 7.43  | 8.72  | 7.87  | 8.25  | 6.21  | 7.17  |
| 1552719_at   | CASC4                           | cancer susceptibility candidate 4                                                                                  | 0.637803 | 7.75  | 7.28  | 4.51  | 5.64  | 5.89  | 4.94  | 6.44  | 4.56  | 6.31  | 5.6   |
| 217847_s_at  | THRAP3                          | thyroid hormone receptor associated protein 3                                                                      | 0.638591 | 8.6   | 8.43  | 7.18  | 8.36  | 8.92  | 6.17  | 7.75  | 7.93  | 9.31  | 6.41  |
| 208276_at    | ---                             | ---                                                                                                                | 0.638833 | 7.21  | 4.5   | 6.29  | 7.22  | 6.27  | 6.53  | 7.17  | 8.24  | 7.85  | 7.2   |
| 1553510_s_at | RQCD1                           | RCD1 required for cell differentiation1 homolog (S. pombe)                                                         | 0.639024 | 5.1   | 6.08  | 4.91  | 6.51  | 7.66  | 5.2   | 6.09  | 5.34  | 5.93  | 8.73  |
| 202276_at    | SHFM1                           | split hand/foot malformation (ectrodactyly) type 1                                                                 | 0.639045 | 8.38  | 9.07  | 7.51  | 8.12  | 9.58  | 10.4  | 10.24 | 10.57 | 8.74  | 9.54  |
| 1554577_a_at | PSMD10                          | proteasome (prosome, macropain) 26S subunit, non-ATPase, 10                                                        | 0.639193 | 6.42  | 7.64  | 4.88  | 7.49  | 7.99  | 5.71  | 6.02  | 7.58  | 6.05  | 8.13  |
| 204319_s_at  | RGS10                           | regulator of G-protein signaling 10                                                                                | 0.639343 | 6.8   | 5.88  | 6.4   | 7     | 6.71  | 9.92  | 8.03  | 8.04  | 7.32  | 7.7   |
| 213825_at    | OLIG2                           | oligodendrocyte lineage transcription factor 2                                                                     | 0.639755 | 3.77  | 5.64  | 3.67  | 3.32  | 6.3   | 6.1   | 3.57  | 6.1   | 5.36  | 5.95  |
| 205128_x_at  | PTGS1                           | prostaglandin-endoperoxide synthase 1 (prostaglandin G/H synthase and cyclooxygenase)                              | 0.639755 | 7.71  | 7.94  | 6.17  | 7.66  | 7.95  | 10.12 | 8.99  | 9.61  | 7.99  | 8.26  |
| 226765_at    | SPTBN1                          | Spectrin, beta, non-erythrocytic 1                                                                                 | 0.639755 | 6.12  | 6.09  | 4.99  | 6.43  | 7.62  | 7.36  | 8.14  | 6.75  | 6.83  | 5.22  |
| 1569609_at   | ---                             | ---                                                                                                                | 0.639911 | 7.52  | 7.59  | 7.6   | 7.12  | 6.94  | 5.99  | 7.28  | 5.26  | 6.67  | 3.3   |
| 229025_s_at  | IMMP1L                          | IMP1 inner mitochondrial membrane peptidase-like (S. cerevisiae)                                                   | 0.639964 | 4.52  | 4.4   | 5.02  | 3.99  | 7.61  | 4.36  | 7.65  | 7.19  | 5.18  | 7.24  |
| 1553906_s_at | FGD2                            | FYVE, RhoGEF and PH domain containing 2                                                                            | 0.639964 | 5.47  | 9.03  | 8.25  | 7.07  | 8.71  | 10.15 | 8.62  | 6.97  | 7.65  | 6.18  |
| 1558392_at   | SYNE2                           | spectrin repeat containing, nuclear envelope 2                                                                     | 0.64021  | 8.62  | 8.59  | 4.57  | 7.1   | 6.34  | 2.8   | 6.74  | 7.4   | 8.39  | 6.29  |
| 1559614_at   | FLJ38773                        | hypothetical protein FLJ38773                                                                                      | 0.641068 | 7.39  | 7.28  | 5.47  | 6.44  | 5.6   | 3.49  | 5.79  | 3.42  | 6.2   | 5.46  |
| 227087_at    | INPP4A                          | inositol polyphosphate-4-phosphatase, type I, 107kDa polymerase (RNA) II (DNA directed) polypeptide J4, pseudogene | 0.64111  | 8.49  | 8.53  | 6.71  | 7.38  | 8.01  | 6.62  | 7.64  | 8.23  | 7.39  | 3.2   |
| 60815_at     | POLR2J4                         | polymerase (RNA) II (DNA directed) polypeptide J4, pseudogene                                                      | 0.641223 | 7.8   | 7.47  | 4.52  | 6.44  | 7.68  | 5.24  | 7.07  | 4.25  | 7.74  | 5.63  |
| 213846_at    | COX7C                           | cytochrome c oxidase subunit VIIc                                                                                  | 0.641365 | 6.24  | 7.48  | 7.24  | 5.91  | 7.17  | 8.87  | 7.67  | 8.5   | 6.96  | 8.78  |
| 239234_at    | ---                             | ---                                                                                                                | 0.641654 | 7.49  | 7.19  | 6.94  | 7.55  | 6.17  | 5.28  | 5.05  | 5.54  | 7.79  | 6.75  |
| 229514_at    | C14orf118                       | chromosome 14 open reading frame 118                                                                               | 0.642176 | 8.09  | 8.29  | 4.03  | 7.07  | 7.95  | 4.12  | 7.08  | 4.64  | 7.65  | 7.01  |
| 226866_at    | ESCO1                           | establishment of cohesion 1 homolog 1 (S. cerevisiae)                                                              | 0.642176 | 7.68  | 8.76  | 7.06  | 7.79  | 7.84  | 6.89  | 7.55  | 6.47  | 7.66  | 4.04  |
| 203096_s_at  | RAPGEF2                         | Rap guanine nucleotide exchange factor (GEF) 2                                                                     | 0.642691 | 8.83  | 8.54  | 8.49  | 8.74  | 8.32  | 7.56  | 8.75  | 7.29  | 8.77  | 5.5   |

|              |              |                                                                                                                                             |          |      |      |      |      |      |       |      |      |      |      |
|--------------|--------------|---------------------------------------------------------------------------------------------------------------------------------------------|----------|------|------|------|------|------|-------|------|------|------|------|
| 1565567_at   | ---          | ---                                                                                                                                         | 0.643031 | 6.44 | 8.21 | 7.24 | 7.46 | 5.85 | 8.2   | 5.72 | 6.65 | 6.79 | 9.13 |
| 236678_at    | ---          | ---                                                                                                                                         | 0.643965 | 7.55 | 4.74 | 7.25 | 5.55 | 5.61 | 3.51  | 5.56 | 7.19 | 4.76 | 6.14 |
| 200749_at    | RAN          | RAN, member RAS oncogene family                                                                                                             | 0.644481 | 5.22 | 5.19 | 3.14 | 5.12 | 5.33 | 7.1   | 6.23 | 3.78 | 4.71 | 6.91 |
| 225054_x_at  | LOC651250    | hypothetical LOC651250                                                                                                                      | 0.645036 | 8    | 6.83 | 5.13 | 7.33 | 7.22 | 5.31  | 5.85 | 5.2  | 7.42 | 7.13 |
| 243328_at    | ---          | ---                                                                                                                                         | 0.645037 | 7.15 | 5.97 | 7.45 | 8.45 | 5.22 | 3.64  | 5.55 | 5.4  | 6.04 | 3.97 |
| 208363_s_at  | INPP4A       | inositol polyphosphate-4-phosphatase, type I, 107kDa                                                                                        | 0.645148 | 7.3  | 7.98 | 5.66 | 6.87 | 7.13 | 8.64  | 6.24 | 7.18 | 6.19 | 4.64 |
| 235175_at    | GBP4         | guanylate binding protein 4                                                                                                                 | 0.645853 | 6.98 | 8.01 | 8.74 | 8.87 | 7.36 | 7.23  | 7.36 | 4.18 | 8.14 | 7.64 |
| 235580_at    | ZNF141       | zinc finger protein 141                                                                                                                     | 0.646026 | 7.34 | 6.78 | 4.49 | 5.75 | 7.62 | 5.6   | 5.17 | 6.71 | 6.91 | 4.92 |
| 231528_at    | ---          | ---                                                                                                                                         | 0.646091 | 5.66 | 6.88 | 6.04 | 6.99 | 6.85 | 4.41  | 6.78 | 5.95 | 5.3  | 3.72 |
| 214195_at    | TPP1         | tripeptidyl peptidase I                                                                                                                     | 0.647054 | 6.67 | 4.54 | 7.78 | 5.86 | 6.38 | 6.62  | 4.42 | 5.01 | 5.95 | 6.51 |
| 223661_at    | NUCKS1       | Nuclear casein kinase and cyclin-dependent kinase substrate 1                                                                               | 0.647907 | 5.26 | 6.36 | 6.52 | 4.91 | 5.06 | 6.84  | 7.3  | 7.64 | 5.83 | 4.52 |
| 1560636_a_at | ---          | ---                                                                                                                                         | 0.648354 | 8.57 | 4.73 | 9.38 | 7.95 | 7.56 | 9.06  | 7.65 | 8.16 | 8.68 | 8.73 |
| 217422_s_at  | CD22         | CD22 molecule                                                                                                                               | 0.648897 | 4.16 | 6.94 | 4.53 | 4.76 | 5.81 | 5.55  | 6.14 | 6.87 | 3.41 | 4.21 |
| 204671_s_at  | ANKRD6       | ankyrin repeat domain 6                                                                                                                     | 0.648897 | 6.16 | 6.05 | 5.42 | 5.41 | 6.19 | 3.06  | 5.56 | 6.36 | 5.28 | 3.73 |
| 213831_at    | HLA-DQA1     | major histocompatibility complex, class II, DQ alpha 1                                                                                      | 0.649003 | 3.71 | 6.94 | 3.85 | 5.66 | 3.19 | 3.6   | 6.98 | 7.3  | 3.49 | 3.34 |
| 203819_s_at  | IGF2BP3      | insulin-like growth factor 2 mRNA binding protein 3                                                                                         | 0.649073 | 6.43 | 6.03 | 6.47 | 7.06 | 6.04 | 8.84  | 6.54 | 8.19 | 5.64 | 5.39 |
| 1554153_a_at | PHF21A       | PHD finger protein 21A                                                                                                                      | 0.649559 | 9.51 | 9.63 | 7.11 | 9.72 | 9.14 | 6.73  | 8.8  | 7.64 | 8.76 | 6.37 |
| 1567213_at   | PNN          | pinin, desmosome associated protein                                                                                                         | 0.649612 | 8.63 | 7.71 | 4.34 | 6.7  | 7.73 | 6.86  | 8.53 | 8.36 | 7.92 | 5.4  |
| 200872_at    | S100A10      | S100 calcium binding protein A10                                                                                                            | 0.650497 | 6.11 | 5.79 | 4.55 | 6.65 | 7.8  | 8.95  | 8.61 | 9    | 6.81 | 6.99 |
| 210427_x_at  | ANXA2        | annexin A2                                                                                                                                  | 0.65058  | 5.87 | 6.7  | 6.77 | 6.98 | 8.33 | 10.53 | 9.14 | 9.68 | 6.82 | 6.27 |
| 220496_at    | CLEC1B       | C-type lectin domain family 1, member B                                                                                                     | 0.65058  | 4.67 | 3.86 | 5.13 | 5.67 | 6.23 | 8.76  | 6.86 | 7.62 | 6.15 | 6.44 |
| 225207_at    | PDK4         | pyruvate dehydrogenase kinase, isozyme 4                                                                                                    | 0.651033 | 5.67 | 5    | 5.29 | 4.99 | 8.25 | 7.3   | 6.57 | 7.01 | 8.75 | 7.42 |
| 201302_at    | ANXA4        | annexin A4                                                                                                                                  | 0.651389 | 4.99 | 5.05 | 6.51 | 5.38 | 6.45 | 8.1   | 6.05 | 5.84 | 4.57 | 6.52 |
| 244187_at    | ---          | ---                                                                                                                                         | 0.651462 | 4.78 | 6.52 | 4.87 | 7.15 | 6.85 | 7.66  | 7.56 | 7.65 | 7.43 | 7.24 |
| 236379_at    | ---          | ---                                                                                                                                         | 0.651738 | 7.99 | 7.37 | 5.57 | 7.21 | 7.04 | 5.65  | 7.66 | 7.33 | 8.17 | 4.93 |
| 1554010_at   | NDST1        | N-deacetylase/N-sulfotransferase (heparan glucosaminyl) 1                                                                                   | 0.652405 | 6.48 | 4.73 | 6.96 | 5.87 | 4.58 | 5.32  | 7.72 | 4.94 | 7.36 | 7.09 |
| 208161_s_at  | ABCC3        | ATP-binding cassette, sub-family C (CFTR/MRP), member 3                                                                                     | 0.6537   | 4.95 | 4.6  | 4.89 | 3.93 | 4.69 | 7.77  | 6.87 | 7.42 | 4.78 | 4.74 |
| 238149_at    | ZNF818P      | zinc finger protein 818 pseudogene                                                                                                          | 0.653769 | 5.16 | 5.68 | 4.75 | 6.36 | 6    | 3.66  | 6.05 | 4.11 | 6.28 | 3.42 |
| 240547_at    | ---          | ---                                                                                                                                         | 0.653847 | 6.69 | 6.08 | 5.06 | 6.47 | 6.66 | 5.6   | 6.97 | 5.44 | 8.05 | 4.7  |
| 229297_at    | ---          | ---                                                                                                                                         | 0.654716 | 5.57 | 6.98 | 4.94 | 6.76 | 6.05 | 3.83  | 6.38 | 5.09 | 5.27 | 3.26 |
| 1556896_at   | LOC284751    | hypothetical LOC284751                                                                                                                      | 0.654923 | 7.29 | 7.03 | 6.59 | 5.22 | 6.73 | 3.95  | 4.02 | 3.92 | 7.01 | 4.59 |
| 212827_at    | IGHM         | immunoglobulin heavy constant mu                                                                                                            | 0.655206 | 5.61 | 8.98 | 4.27 | 5.49 | 6.18 | 6.72  | 6.49 | 7.62 | 6.21 | 6.56 |
| 201016_at    | EIF1AX       | eukaryotic translation initiation factor 1A, X-linked                                                                                       | 0.655976 | 6    | 7.09 | 2.76 | 4.55 | 5.42 | 7.38  | 6.51 | 6.91 | 5.8  | 5.56 |
| 203497_at    | MED1         | mediator complex subunit 1                                                                                                                  | 0.655976 | 9.23 | 8.73 | 5.68 | 8.54 | 8.46 | 7.7   | 8.64 | 8.19 | 9.2  | 7.11 |
| 220969_s_at  | ---          | ---                                                                                                                                         | 0.656945 | 4.1  | 4.97 | 5.65 | 4.86 | 4.12 | 7.5   | 4.86 | 6.34 | 5.33 | 8.21 |
| 208923_at    | CYFIP1       | cytoplasmic FMR1 interacting protein 1                                                                                                      | 0.656945 | 6.36 | 5.52 | 5.09 | 5.25 | 6.08 | 7.52  | 7.28 | 7.51 | 6.27 | 4.59 |
| 214073_at    | CTTN         | cortactin                                                                                                                                   | 0.657124 | 3.86 | 3.08 | 5.1  | 4.72 | 6.94 | 10.52 | 6.91 | 9.92 | 5.41 | 3.12 |
| 221253_s_at  | TXNDC5       | thioredoxin domain containing 5 (endoplasmic reticulum)<br>RRN3 RNA polymerase I transcription factor homolog (S.<br>cerevisiae) pseudogene | 0.657124 | 5.28 | 5.81 | 2.62 | 4.99 | 5.6  | 6.97  | 6.59 | 7.21 | 5.27 | 5.33 |
| 238413_at    | LOC100131998 | ---                                                                                                                                         | 0.657124 | 6.77 | 6.37 | 5.76 | 6.25 | 5.99 | 3.87  | 6.63 | 4.82 | 6.79 | 4.18 |

|              |          |                                                                                  |          |       |       |       |      |       |       |       |       |      |       |
|--------------|----------|----------------------------------------------------------------------------------|----------|-------|-------|-------|------|-------|-------|-------|-------|------|-------|
| 229966_at    | EWSR1    | Ewing sarcoma breakpoint region 1                                                | 0.657124 | 8.19  | 7.87  | 7.07  | 7.35 | 7.6   | 4.6   | 7.08  | 6.59  | 7.85 | 6.28  |
| 1552316_a_at | GIMAP1   | GTPase, IMAP family member 1                                                     | 0.657534 | 5.37  | 6.85  | 3.34  | 6.01 | 8.31  | 9.18  | 8.69  | 9.02  | 7.46 | 6.51  |
| 224926_at    | EXOC4    | exocyst complex component 4                                                      | 0.657804 | 4.95  | 6.68  | 7.44  | 6.02 | 6.66  | 4.76  | 6.06  | 5.07  | 5.5  | 4.01  |
| 222720_x_at  | C1orf27  | chromosome 1 open reading frame 27                                               | 0.657838 | 8.37  | 8.74  | 5.57  | 7.59 | 8.25  | 5.71  | 8.82  | 7.79  | 7.65 | 5.48  |
| 1553117_a_at | STK38    | serine/threonine kinase 38                                                       | 0.658925 | 8.27  | 8.41  | 9.28  | 8.45 | 8.37  | 6.17  | 7.26  | 7.44  | 7.79 | 6.19  |
| 227796_at    | ZFP62    | zinc finger protein 62 homolog (mouse)                                           | 0.660597 | 6.62  | 8.46  | 4.27  | 5.11 | 8.2   | 4.44  | 7.13  | 5.24  | 6.53 | 8.15  |
| 236823_at    | ---      | ---                                                                              | 0.660597 | 7.12  | 5.94  | 6.34  | 5.91 | 4.91  | 7.82  | 5.58  | 4.1   | 7.3  | 6.82  |
| 232500_at    | C20orf74 | chromosome 20 open reading frame 74                                              | 0.660597 | 8.39  | 6.73  | 6.02  | 7.22 | 6.55  | 5.35  | 7.71  | 6.11  | 7.69 | 8.36  |
| 1552552_s_at | CLEC4C   | C-type lectin domain family 4, member C                                          | 0.660877 | 2.7   | 3.21  | 7.13  | 7.1  | 8.16  | 7.94  | 6.05  | 7.46  | 6.71 | 6.76  |
| 1554001_at   | TRIM37   | tripartite motif-containing 37                                                   | 0.660877 | 6.56  | 5.84  | 7.31  | 6.93 | 5.41  | 6.89  | 3.7   | 5.18  | 5.37 | 8.28  |
| 223292_s_at  | MRPS15   | mitochondrial ribosomal protein S15                                              | 0.661122 | 7.58  | 4.37  | 8.23  | 3.2  | 6.4   | 6.25  | 7.93  | 7.25  | 6.61 | 5.18  |
| 215813_s_at  | PTGS1    | prostaglandin-endoperoxide synthase 1 (prostaglandin G/H synthase and cyclooxyge | 0.661122 | 7.93  | 7.83  | 5.33  | 7.73 | 8.14  | 10.26 | 9.06  | 9.73  | 8.02 | 8.5   |
| 1566202_at   | ---      | ---                                                                              | 0.661295 | 7.55  | 5.22  | 4.69  | 7.17 | 4.85  | 4.69  | 7.27  | 6.92  | 7.66 | 4.64  |
| 206881_s_at  | LILRA3   | leukocyte immunoglobulin-like receptor, subfamily A (without TM domain), member  | 0.661295 | 10.43 | 10.55 | 8.83  | 9.35 | 10.21 | 9.94  | 9.53  | 10.56 | 7.38 | 7.31  |
| 204411_at    | KIF21B   | kinesin family member 21B                                                        | 0.661295 | 7.69  | 7.84  | 5.93  | 7.68 | 8.2   | 6.1   | 7.81  | 5.99  | 8.21 | 5.57  |
| 203740_at    | MPHOSPH6 | M-phase phosphoprotein 6                                                         | 0.661356 | 5.52  | 5.18  | 3.79  | 4.75 | 6.55  | 7.36  | 6.81  | 6.46  | 5.92 | 6.76  |
| 201528_at    | RPA1     | replication protein A1, 70kDa                                                    | 0.661406 | 7.07  | 5.33  | 6.38  | 6.61 | 7.08  | 9.58  | 7.12  | 8.63  | 6.27 | 7.28  |
| 1558740_s_at | ---      | ---                                                                              | 0.661473 | 6.74  | 6.65  | 5.58  | 6.97 | 4.71  | 7.02  | 7.23  | 3.7   | 7.17 | 6.46  |
| 213503_x_at  | ANXA2    | annexin A2                                                                       | 0.662492 | 5.86  | 6.75  | 6.76  | 6.87 | 8.13  | 10.55 | 9.09  | 9.49  | 6.93 | 6.01  |
| 217529_at    | ORAI2    | ORAI calcium release-activated calcium modulator 2                               | 0.662492 | 9.08  | 8.57  | 8.08  | 9.11 | 8.78  | 6     | 7.8   | 6.76  | 7.57 | 5.11  |
| 213277_at    | ZFP36L1  | zinc finger protein 36, C3H type-like 1                                          | 0.662652 | 5.8   | 5.96  | 8.58  | 6.71 | 5.84  | 7.34  | 5.73  | 6.54  | 6.27 | 8.04  |
| 201938_at    | CDK2AP1  | cyclin-dependent kinase 2 associated protein 1                                   | 0.662707 | 8.16  | 8.43  | 8.71  | 8.28 | 9.58  | 11.12 | 10.11 | 10.5  | 8.83 | 8.7   |
| 223006_s_at  | C9orf5   | chromosome 9 open reading frame 5                                                | 0.663269 | 4.26  | 5.93  | 6.28  | 4.41 | 6.79  | 6.21  | 7.73  | 5.01  | 4.87 | 4.66  |
| 236545_at    | ---      | ---                                                                              | 0.66347  | 7.09  | 5.93  | 6.33  | 6.69 | 6.89  | 7.56  | 5.6   | 5.29  | 6.14 | 3.9   |
| 235134_at    | ---      | ---                                                                              | 0.663845 | 4.19  | 6.62  | 4.11  | 4.21 | 3.7   | 6.47  | 4.42  | 4.22  | 4.22 | 7.2   |
| 212826_s_at  | SLC25A6  | solute carrier family 25 (mitochondrial carrier; adenine nucleotide translocator | 0.663887 | 8.27  | 9.33  | 8.21  | 9.18 | 10.11 | 11.72 | 10.81 | 10.76 | 9.94 | 10.39 |
| 209447_at    | SYNE1    | spectrin repeat containing, nuclear envelope 1                                   | 0.664014 | 6.44  | 6.7   | 3.74  | 6.25 | 7.57  | 8.49  | 7.92  | 5.91  | 7.54 | 3.86  |
| 242121_at    | ---      | ---                                                                              | 0.664014 | 6.31  | 6.65  | 4.57  | 7.06 | 6.72  | 3.95  | 6.48  | 3.94  | 5.91 | 5.94  |
| 215513_at    | HYMAI    | hydantidiform mole associated and imprinted (non-protein coding)                 | 0.664621 | 6.59  | 4.39  | 4.45  | 6.79 | 4.09  | 3.85  | 4.09  | 3.49  | 6.26 | 3.41  |
| 223797_at    | PRO2852  | hypothetical protein PRO2852                                                     | 0.665434 | 9.08  | 8.28  | 4.85  | 8.39 | 8.35  | 6.45  | 8.83  | 6.42  | 9.13 | 7.03  |
| 206214_at    | PLA2G7   | phospholipase A2, group VII (platelet-activating factor acetylhydrolase, plasma) | 0.665556 | 4.26  | 4.17  | 4.24  | 4.68 | 4.72  | 7.25  | 6.33  | 6.81  | 3.94 | 4.45  |
| 1553266_at   | CNOT6L   | CCR4-NOT transcription complex, subunit 6-like                                   | 0.666142 | 7.49  | 5.4   | 3.65  | 6.04 | 6.4   | 7.77  | 6.18  | 4.28  | 7.08 | 7.76  |
| 211310_at    | EZH1     | enhancer of zeste homolog 1 (Drosophila)                                         | 0.666318 | 5.24  | 5.55  | 5.19  | 5.55 | 4.93  | 5.05  | 6.79  | 7.25  | 7.61 | 8.71  |
| 215310_at    | APC      | adenomatous polyposis coli                                                       | 0.667077 | 6.15  | 4.61  | 4.37  | 6.74 | 5.01  | 3.94  | 5.94  | 4.29  | 6.05 | 4     |
| 200873_s_at  | CCT8     | chaperonin containing TCP1, subunit 8 (theta)                                    | 0.667252 | 7.61  | 7.62  | 5.08  | 7.13 | 7.62  | 9.41  | 8.77  | 8.63  | 7.86 | 7.07  |
| 1559018_at   | PTPRE    | protein tyrosine phosphatase, receptor type, E                                   | 0.667426 | 7.51  | 6.12  | 6.15  | 7.43 | 5.88  | 3.37  | 7.72  | 5.2   | 8.08 | 4.78  |
| 242438_at    | ASXL1    | additional sex combs like 1 (Drosophila)                                         | 0.667426 | 6.77  | 5.34  | 4.76  | 5.25 | 4.53  | 5.71  | 5.72  | 4.7   | 7.75 | 6.31  |
| 209727_at    | GM2A     | GM2 ganglioside activator                                                        | 0.668113 | 5.49  | 6.33  | 10.17 | 9.95 | 6.96  | 7.6   | 8.78  | 9.41  | 5.41 | 7.74  |
| 1565716_at   | FUS      | fusion (involved in t(12;16) in malignant liposarcoma)                           | 0.668113 | 7.11  | 7.67  | 8.53  | 7.7  | 7.92  | 5.88  | 7.8   | 4.85  | 9.48 | 9.4   |

|              |              |                                                                                  |          |      |      |      |      |      |       |       |       |      |      |
|--------------|--------------|----------------------------------------------------------------------------------|----------|------|------|------|------|------|-------|-------|-------|------|------|
| 220220_at    | LRRC37A4     | leucine rich repeat containing 37, member A4 (pseudogene)                        | 0.668378 | 7.91 | 7.99 | 4.46 | 6.19 | 7.77 | 4.76  | 6.54  | 6.48  | 7.85 | 4.91 |
| 1567214_a_at | PNN          | pinin, desmosome associated protein                                              | 0.668697 | 9.46 | 8.21 | 4.8  | 7.94 | 8.5  | 7.44  | 9.11  | 8.66  | 8.81 | 6.29 |
| 226103_at    | NEXN         | nexilin (F actin binding protein)                                                | 0.668747 | 4.99 | 5.07 | 4.29 | 4.67 | 6.05 | 6.59  | 6.48  | 7.25  | 4.94 | 4.22 |
| 223193_x_at  | FAM162A      | family with sequence similarity 162, member A                                    | 0.669322 | 6.03 | 5.69 | 5.01 | 4.41 | 4.67 | 8.15  | 5.71  | 6.63  | 6.25 | 7.13 |
| 1554171_at   | ZMYM3        | zinc finger, MYM-type 3                                                          | 0.669322 | 4.94 | 5.27 | 6.16 | 5.01 | 7.35 | 5.42  | 6.76  | 4.9   | 5.55 | 7.53 |
| 228053_s_at  | TOMM5        | translocase of outer mitochondrial membrane 5 homolog (yeast)                    | 0.6698   | 5.79 | 6.64 | 3.19 | 5.93 | 6.29 | 7.66  | 7.33  | 6.42  | 6.75 | 6.26 |
| 235217_at    | LOC100216546 | hypothetical LOC100216546                                                        | 0.669848 | 7.46 | 6.55 | 5.24 | 7.52 | 5.28 | 4.94  | 6.75  | 6.72  | 6.57 | 4.94 |
| 205513_at    | TCN1         | transcobalamin I (vitamin B12 binding protein, R binder family)                  | 0.670204 | 4.78 | 5.21 | 6.47 | 5.23 | 7.02 | 7.68  | 6.69  | 8.47  | 6.09 | 6.72 |
| 213403_at    | MFSD9        | Major facilitator superfamily domain containing 9                                | 0.670336 | 7.96 | 8.62 | 5.75 | 5.02 | 6.66 | 5.44  | 7.19  | 6.22  | 5.64 | 4.69 |
| 230139_at    | ---          | ---                                                                              | 0.671923 | 4.58 | 3.99 | 7.26 | 7.3  | 6.9  | 5.59  | 4.17  | 3.76  | 5.18 | 5.62 |
| 242263_at    | TMED5        | Transmembrane emp24 protein transport domain containing 5                        | 0.672379 | 6.07 | 4.81 | 3.92 | 5.08 | 5.92 | 3.52  | 6.2   | 7.18  | 6.2  | 7.13 |
| 235242_at    | ---          | ---                                                                              | 0.672563 | 8.04 | 7.54 | 7.33 | 7.99 | 7.42 | 5.4   | 8.19  | 6.44  | 7.89 | 5.27 |
| 213165_at    | CEP350       | centrosomal protein 350kDa                                                       | 0.673466 | 7.85 | 8.47 | 5.96 | 7.76 | 8.07 | 5.85  | 6.07  | 5.36  | 7.3  | 6.02 |
| 216555_at    | C22orf30     | chromosome 22 open reading frame 30                                              | 0.673466 | 8.39 | 7.79 | 7.33 | 7.97 | 7.44 | 7.9   | 7.74  | 8.07  | 8.33 | 3.87 |
| 200665_s_at  | SPARC        | secreted protein, acidic, cysteine-rich (osteonectin)                            | 0.673752 | 5.52 | 3.58 | 5.74 | 7.19 | 7.17 | 10.87 | 9.17  | 9.99  | 6.82 | 7.65 |
| 1554331_a_at | LRRC18       | leucine rich repeat containing 18                                                | 0.674446 | 7.56 | 7.33 | 4.04 | 4.82 | 6.88 | 4.87  | 5.85  | 3.62  | 6.97 | 5.53 |
| 208998_at    | UCP2         | uncoupling protein 2 (mitochondrial, proton carrier)                             | 0.674957 | 7.41 | 7.28 | 8.61 | 8.69 | 9.23 | 10.63 | 10.03 | 10.37 | 8.84 | 8.72 |
| 1560255_at   | C10orf31     | chromosome 10 open reading frame 31                                              | 0.675756 | 6.24 | 4.63 | 6.28 | 6.61 | 5.48 | 4     | 5.62  | 4.76  | 6.66 | 4.05 |
| 231860_at    | BRWD1        | bromodomain and WD repeat domain containing 1                                    | 0.675778 | 6.5  | 6.17 | 4.16 | 3.98 | 5.12 | 4.3   | 4.42  | 5.07  | 6.19 | 6.61 |
| 1569110_x_at | LOC728613    | programmed cell death 6 pseudogene                                               | 0.676448 | 5.1  | 5.51 | 3.49 | 6.19 | 6.98 | 3.7   | 7.36  | 8.44  | 6.48 | 3.2  |
| 231839_at    | PDE12        | phosphodiesterase 12                                                             | 0.676476 | 7.03 | 6.22 | 4.82 | 5.96 | 6.97 | 5.67  | 8.22  | 5.11  | 7.06 | 4.71 |
| 219199_at    | AFF4         | AF4/FMR2 family, member 4                                                        | 0.676692 | 7.52 | 7.72 | 5.73 | 7.96 | 7.16 | 5.35  | 7.43  | 7.01  | 7.41 | 4.04 |
| 214480_at    | ETV3         | ets variant 3                                                                    | 0.67708  | 7.39 | 6.56 | 8.5  | 7.58 | 6.76 | 8.63  | 6.43  | 6.5   | 6.32 | 5.33 |
| 208680_at    | PRDX1        | peroxiredoxin 1                                                                  | 0.677925 | 5.48 | 7.02 | 4.58 | 5.08 | 6.93 | 7.97  | 7.7   | 7.48  | 6.02 | 5.68 |
| 1558560_s_at | BLZF1        | basic leucine zipper nuclear factor 1                                            | 0.678369 | 6.07 | 6.58 | 4.51 | 5.92 | 6.7  | 4.23  | 6.72  | 5.92  | 6.76 | 4.16 |
| 208794_s_at  | SMARCA4      | SWI/SNF related, matrix associated, actin dependent regulator of chromatin, subf | 0.678643 | 8.72 | 7.74 | 5.38 | 8.08 | 8.38 | 8.88  | 9.18  | 9.21  | 8.47 | 6.46 |
| 211037_s_at  | MBOAT7       | membrane bound O-acyltransferase domain containing 7                             | 0.678643 | 7.88 | 6.75 | 6.59 | 7.26 | 6.53 | 5.05  | 6.66  | 4.82  | 7.28 | 4.09 |
| 201005_at    | CD9          | CD9 molecule                                                                     | 0.678643 | 6.22 | 5.46 | 7.75 | 8.31 | 7.27 | 9.89  | 7.52  | 7.53  | 6.91 | 8.64 |
| 229521_at    | FLJ36031     | hypothetical protein FLJ36031                                                    | 0.679444 | 8.06 | 6.24 | 9.48 | 8.76 | 9.22 | 8.01  | 8.15  | 7.63  | 8.11 | 6.34 |
| 1569867_at   | EME2         | essential meiotic endonuclease 1 homolog 2 (S. pombe)                            | 0.679693 | 5.26 | 6.67 | 4.68 | 5.06 | 4.71 | 3.73  | 3.37  | 6.1   | 3.27 | 6.11 |
| 209654_at    | KIAA0947     | KIAA0947 protein                                                                 | 0.680415 | 7.12 | 7.79 | 3.76 | 6.47 | 6.04 | 5.93  | 6.48  | 6.56  | 6.67 | 4.35 |
| 1568830_at   | IRAK3        | interleukin-1 receptor-associated kinase 3                                       | 0.680445 | 6.93 | 4.96 | 7.24 | 7.53 | 6.35 | 3.67  | 6.73  | 5.78  | 6.9  | 6.4  |
| 201590_x_at  | ANXA2        | annexin A2                                                                       | 0.68048  | 5.83 | 6.72 | 6.76 | 6.97 | 8.3  | 10.54 | 9.18  | 9.65  | 6.9  | 5.44 |
| 1555749_at   | SF1          | splicing factor 1                                                                | 0.681035 | 8.09 | 7.7  | 7.23 | 7.52 | 7.57 | 4.77  | 6.05  | 6.93  | 8.4  | 6.22 |
| 215555_at    | ---          | ---                                                                              | 0.681035 | 5.14 | 4.78 | 4.66 | 6.25 | 4.8  | 6.96  | 6.1   | 3.62  | 6.23 | 6.05 |
| 242433_at    | ZBTB11       | zinc finger and BTB domain containing 11                                         | 0.681035 | 7.01 | 7.16 | 4.47 | 5.72 | 7.27 | 4.32  | 6.73  | 4.41  | 6.97 | 5.15 |
| 215751_at    | RBM26        | RNA binding motif protein 26                                                     | 0.681357 | 6.16 | 5.59 | 2.65 | 4.88 | 5.34 | 7.36  | 5.39  | 6.88  | 5.74 | 8.26 |

|              |           |                                                                                                                               |          |      |      |      |      |      |       |      |      |      |      |
|--------------|-----------|-------------------------------------------------------------------------------------------------------------------------------|----------|------|------|------|------|------|-------|------|------|------|------|
| 1561489_at   | ---       | ---                                                                                                                           | 0.682479 | 7.3  | 6.91 | 5.12 | 6.53 | 6.07 | 3.94  | 6.75 | 6.18 | 7    | 6.44 |
| 225767_at    | LOC284801 | hypothetical protein LOC284801                                                                                                | 0.682749 | 6.46 | 6.73 | 5.94 | 6.94 | 7.27 | 8.93  | 7.81 | 7.93 | 6.73 | 9.13 |
| 1555892_s_at | LOC253039 | hypothetical LOC253039                                                                                                        | 0.682837 | 6    | 6.67 | 7.32 | 5.19 | 4.39 | 4.51  | 4.21 | 3.99 | 6.36 | 5.37 |
| 243826_at    | ---       | ---                                                                                                                           | 0.683121 | 6.87 | 7.31 | 3.97 | 6.27 | 5.7  | 4.01  | 7.24 | 4.14 | 6.78 | 3.78 |
| 219628_at    | ZMAT3     | zinc finger, matrin type 3                                                                                                    | 0.683354 | 6.28 | 5.17 | 3.01 | 4.71 | 6.6  | 6.19  | 5.16 | 5.92 | 5.99 | 9.62 |
| 1556049_at   | RTN4      | reticulon 4                                                                                                                   | 0.683464 | 8.59 | 6.53 | 7.9  | 8.27 | 7.28 | 5.75  | 6.74 | 7.34 | 8.05 | 9.03 |
| 228179_at    | HAS3      | hyaluronan synthase 3                                                                                                         | 0.684033 | 7.46 | 8.3  | 5.58 | 7.46 | 4.86 | 6.92  | 8.88 | 7.93 | 8.51 | 9.11 |
| 224741_x_at  | GAS5      | growth arrest-specific 5 (non-protein coding)                                                                                 | 0.684033 | 8.77 | 8.51 | 6.75 | 7.63 | 8.88 | 10.01 | 9.99 | 8.96 | 8.48 | 7.8  |
| 218781_at    | SMC6      | structural maintenance of chromosomes 6<br>v-myc myelocytomatosis viral oncogene homolog 1, lung<br>carcinoma derived (avian) | 0.684371 | 5.02 | 6.72 | 3.68 | 5.48 | 6.04 | 3.91  | 7.63 | 4.89 | 7.04 | 5.84 |
| 214058_at    | MYCL1     | carcinoma derived (avian)                                                                                                     | 0.684646 | 6.03 | 5.87 | 5.67 | 5.01 | 6.06 | 8.47  | 6.04 | 7.22 | 5.38 | 5.26 |
| 202843_at    | DNAJB9    | DnaJ (Hsp40) homolog, subfamily B, member 9                                                                                   | 0.685695 | 8.49 | 5.32 | 8.75 | 8.23 | 7.96 | 4.71  | 7.59 | 5.85 | 7.94 | 4.76 |
| 225795_at    | C22orf32  | chromosome 22 open reading frame 32                                                                                           | 0.685722 | 4.8  | 5.93 | 4.98 | 4.95 | 6.52 | 8.37  | 8.38 | 8.17 | 5.97 | 6.11 |
| 211951_at    | NOLC1     | nucleolar and coiled-body phosphoprotein 1                                                                                    | 0.685843 | 5.96 | 5.8  | 4.19 | 5.87 | 7.44 | 6.66  | 7.36 | 6.74 | 6.68 | 3.93 |
| 1564207_at   | FLJ35390  | hypothetical LOC255031                                                                                                        | 0.68619  | 8.65 | 5.9  | 6.81 | 7.66 | 8.16 | 8.36  | 6.52 | 5.31 | 7.88 | 5.02 |
| 213357_at    | GTF2H5    | general transcription factor IIH, polypeptide 5                                                                               | 0.68619  | 6.27 | 5.77 | 3.96 | 4.98 | 6.52 | 7.65  | 6.15 | 6.27 | 5.17 | 6.17 |
| 224705_s_at  | TNRC6A    | trinucleotide repeat containing 6A                                                                                            | 0.686198 | 7.2  | 7.4  | 5.5  | 6.31 | 7.26 | 4.02  | 6.99 | 5.58 | 6.37 | 7.95 |
| 1558807_at   | ATAD2B    | ATPase family, AAA domain containing 2B                                                                                       | 0.686198 | 7.13 | 7.27 | 5.02 | 7.05 | 7.14 | 3.35  | 6.2  | 6.4  | 6.59 | 4.52 |
| 1552299_at   | AKD2      | adenylate kinase domain containing 2                                                                                          | 0.686857 | 6.61 | 6.79 | 5.18 | 5.4  | 7.52 | 4.57  | 5.71 | 6.41 | 7.86 | 4.29 |
| 224508_at    | MGC12916  | hypothetical protein MGC12916                                                                                                 | 0.686919 | 6.29 | 4.08 | 6.44 | 5.45 | 4.27 | 4.63  | 6.82 | 4.29 | 4.42 | 4.01 |
| 201825_s_at  | SCCPDH    | saccharopine dehydrogenase (putative)                                                                                         | 0.686919 | 5.82 | 5.53 | 3.36 | 5.25 | 5.9  | 7.06  | 5.82 | 6.16 | 5.57 | 7.29 |
| 230141_at    | ARID4A    | AT rich interactive domain 4A (RBP1-like)                                                                                     | 0.68741  | 6.45 | 6.69 | 4.37 | 6.75 | 6.28 | 3.98  | 5.55 | 4.38 | 6.4  | 2.98 |
| 209377_s_at  | HMGN3     | high mobility group nucleosomal binding domain 3                                                                              | 0.687564 | 5.37 | 5    | 4.42 | 5.39 | 6.52 | 8.48  | 7.56 | 8.19 | 5.3  | 5.41 |
| 214214_s_at  | C1QBP     | complement component 1, q subcomponent binding protein<br>complement component (3b/4b) receptor 1 (Knops blood<br>group)      | 0.687641 | 3.92 | 5.76 | 4.52 | 5.75 | 6.05 | 6.98  | 6.46 | 7.2  | 5.87 | 6.59 |
| 244313_at    | CR1       | neuregulin 1                                                                                                                  | 0.687641 | 9.36 | 9.37 | 7.55 | 9.18 | 9.16 | 6.79  | 9.7  | 9.11 | 9.07 | 6.81 |
| 206237_s_at  | NRG1      | neuregulin 1                                                                                                                  | 0.687906 | 4.95 | 5.41 | 5.56 | 5.4  | 5.32 | 6.89  | 7.51 | 8.84 | 5.34 | 6.49 |
| 1568894_at   | ---       | ---                                                                                                                           | 0.688045 | 9.91 | 6.63 | 8.14 | 8.49 | 7.33 | 5.83  | 7.54 | 8.73 | 9.94 | 4.04 |
| 1556601_a_at | SPATA13   | Spermatogenesis associated 13<br>granzyme B (granzyme 2, cytotoxic T-lymphocyte-associated<br>serine esterase 1)              | 0.688268 | 5.6  | 4.37 | 7.68 | 6.2  | 3.96 | 3.19  | 3.64 | 6.17 | 6.61 | 3.4  |
| 210164_at    | GZMB      | serine esterase 1)                                                                                                            | 0.688282 | 3.4  | 3.56 | 3.29 | 5.14 | 7.25 | 3.09  | 7.38 | 3.7  | 7.52 | 4.89 |
| 225285_at    | BCAT1     | branched chain aminotransferase 1, cytosolic                                                                                  | 0.688282 | 7.33 | 6.8  | 5.76 | 7.75 | 5    | 6.25  | 5.34 | 6.2  | 7.8  | 8.12 |
| 204184_s_at  | ADRBK2    | adrenergic, beta, receptor kinase 2                                                                                           | 0.688282 | 6    | 7.23 | 5.3  | 6.47 | 8.11 | 8.43  | 7.5  | 8.51 | 7.01 | 6.51 |
| 1558732_at   | MAP4K4    | mitogen-activated protein kinase kinase kinase kinase 4                                                                       | 0.688618 | 7.22 | 6.25 | 7.72 | 7.13 | 5.43 | 7.15  | 7.41 | 5.23 | 7.38 | 4.48 |
| 229497_at    | ANKDD1A   | ankyrin repeat and death domain containing 1A                                                                                 | 0.688618 | 7.98 | 6.85 | 7.89 | 7.78 | 6.16 | 6.5   | 6.98 | 4.21 | 7.99 | 8.28 |
| 206209_s_at  | CA4       | carbonic anhydrase IV                                                                                                         | 0.688618 | 8.12 | 7.74 | 6.94 | 7.74 | 8.07 | 8.11  | 7.22 | 8.23 | 6.35 | 4.9  |
| 1561538_at   | ---       | ---                                                                                                                           | 0.689052 | 7.91 | 5.23 | 6.59 | 7.43 | 5.43 | 4.52  | 6.43 | 5.7  | 6.49 | 6.07 |
| 227605_at    | SCYE1     | small inducible cytokine subfamily E, member 1 (endothelial<br>monocyte-activating)                                           | 0.68921  | 6.57 | 7.14 | 5.08 | 4.8  | 5.95 | 3.96  | 7.02 | 6    | 6.27 | 4.19 |
| 215375_x_at  | LRRFIP1   | Leucine rich repeat (in FLII) interacting protein 1                                                                           | 0.689326 | 6.71 | 7.29 | 5.32 | 6.46 | 4.91 | 4.79  | 7.46 | 5.21 | 6.21 | 4.98 |
| 1562364_at   | ---       | ---                                                                                                                           | 0.689326 | 4.44 | 6.6  | 4.85 | 6.09 | 5.57 | 4.47  | 4.85 | 3.64 | 7.3  | 4.98 |
| 213065_at    | ZFC3H1    | zinc finger, C3H1-type containing                                                                                             | 0.689326 | 7.17 | 6.32 | 4.9  | 7.16 | 5.8  | 4.18  | 6.39 | 5.11 | 7.33 | 7.05 |

|              |                   |                                                                     |          |       |      |       |      |      |      |       |      |       |      |
|--------------|-------------------|---------------------------------------------------------------------|----------|-------|------|-------|------|------|------|-------|------|-------|------|
| 226015_at    | ZNF12             | zinc finger protein 12                                              | 0.689746 | 5.47  | 7.53 | 4.84  | 4.64 | 7.41 | 4.96 | 4.54  | 5.53 | 4.96  | 6.13 |
| 200787_s_at  | PEA15             | phosphoprotein enriched in astrocytes 15                            | 0.689788 | 6.02  | 6.28 | 5.36  | 5.96 | 6.15 | 7.98 | 8.02  | 7.88 | 6.22  | 5.65 |
| 241614_at    | ---               | ---                                                                 | 0.689796 | 6.87  | 6.59 | 6.59  | 3.85 | 6.46 | 8.38 | 8.33  | 7.16 | 8.7   | 7.42 |
| 208442_s_at  | ATM               | ataxia telangiectasia mutated                                       | 0.690019 | 8.55  | 9.77 | 6.63  | 7.55 | 7.94 | 6.02 | 9.42  | 8.78 | 8.47  | 6.81 |
| 244355_at    | AVL9              | AVL9 homolog (S. cerevisiae)                                        | 0.690316 | 7.91  | 7.56 | 7.5   | 7    | 6.67 | 8.52 | 6.75  | 5.3  | 7.59  | 8.92 |
| 226630_at    | C14orf106         | chromosome 14 open reading frame 106                                | 0.690415 | 7.15  | 7.57 | 4.25  | 6.1  | 7.46 | 5.28 | 6.33  | 5.63 | 7.18  | 3.37 |
| 217408_at    | MRPS18B           | mitochondrial ribosomal protein S18B                                | 0.691643 | 5.41  | 7.92 | 4.88  | 5.18 | 7.83 | 7.98 | 7.76  | 8.62 | 7.47  | 8.42 |
| 1556669_a_at | ---               | ---                                                                 | 0.691824 | 7.28  | 3.42 | 7.3   | 7.14 | 4.79 | 5.79 | 7.61  | 6.14 | 7.75  | 4.85 |
| 243366_s_at  | ---               | ---                                                                 | 0.691824 | 5.68  | 6.51 | 3.61  | 4.75 | 6.04 | 6.49 | 6.71  | 5.06 | 6     | 3.18 |
|              |                   | neural precursor cell expressed, developmentally down-regulated 1   |          |       |      |       |      |      |      |       |      |       |      |
| 1560116_a_at | NEDD1             | neural precursor cell expressed, developmentally down-regulated 1   | 0.691824 | 4.14  | 4.72 | 3.34  | 4.93 | 4.55 | 6.93 | 5.88  | 7.39 | 6.38  | 6.69 |
| 239926_at    | ---               | ---                                                                 | 0.691824 | 4.93  | 5.87 | 3.71  | 4.96 | 6.05 | 6.71 | 7.08  | 4.16 | 6.03  | 3.79 |
| 213239_at    | PIBF1             | progesterone immunomodulatory binding factor 1                      | 0.691824 | 5.42  | 3.49 | 6.06  | 6.34 | 5.18 | 4.28 | 5.13  | 4.04 | 6.56  | 6.25 |
| 225115_at    | HIPK2             | homeodomain interacting protein kinase 2                            | 0.692198 | 6.99  | 7.39 | 7     | 6.44 | 7.79 | 3.75 | 6.39  | 8.5  | 7.1   | 5.5  |
| 243611_at    | MICALCL           | MICAL C-terminal like                                               | 0.692198 | 8.46  | 7.98 | 5.91  | 7.97 | 6.69 | 5.28 | 7.49  | 6.07 | 7.57  | 5.4  |
| 230990_at    | KIF13A            | kinesin family member 13A                                           | 0.692793 | 6.98  | 6.6  | 7.61  | 7.3  | 7.13 | 4.43 | 6.62  | 5.24 | 6.64  | 5.68 |
| 226485_at    | FLJ20674          | hypothetical protein FLJ20674                                       | 0.692837 | 2.71  | 2.45 | 6.11  | 4.73 | 2.49 | 6.5  | 2.63  | 2.71 | 2.86  | 7.05 |
| 223334_at    | TMEM126A          | transmembrane protein 126A                                          | 0.692837 | 6.51  | 5.97 | 3.41  | 6.27 | 7.14 | 8.94 | 6.35  | 5.85 | 4.81  | 7.03 |
| 228346_at    | ZNF844            | zinc finger protein 844                                             | 0.693445 | 8.43  | 8.49 | 5.87  | 5.05 | 7.16 | 4.24 | 7.71  | 5.96 | 6.45  | 6.41 |
| 219806_s_at  | C11orf75          | chromosome 11 open reading frame 75                                 | 0.693509 | 8.23  | 8.28 | 8.61  | 8.53 | 6.68 | 7.07 | 6.8   | 7.55 | 6.26  | 5.8  |
| 1553055_a_at | SLFN5             | schlafen family member 5                                            | 0.693805 | 5.67  | 4.35 | 3.7   | 6.08 | 6.2  | 3.87 | 6.79  | 5.08 | 5.53  | 3.75 |
| 223974_at    | MGC11082          | hypothetical LOC84777                                               | 0.694159 | 6.63  | 6.33 | 8.07  | 7.05 | 4.9  | 5.15 | 6.56  | 4.68 | 7.01  | 5.5  |
| 230170_at    | OSM               | oncostatin M                                                        | 0.694823 | 10.38 | 8.13 | 10.45 | 9.97 | 9.67 | 6.24 | 10.22 | 8.33 | 10.33 | 6.4  |
| 236432_at    | ---               | ---                                                                 | 0.694823 | 6.5   | 6.24 | 6.44  | 6.62 | 5.52 | 5.07 | 6.13  | 3.3  | 6.76  | 6.81 |
| 228105_at    | ---               | ---                                                                 | 0.694823 | 7.15  | 5.35 | 4.77  | 5.19 | 4.58 | 4.81 | 6.38  | 5.24 | 6.51  | 7.3  |
| 212062_at    | ATP9A             | ATPase, class II, type 9A                                           | 0.694823 | 7.05  | 6.67 | 6.17  | 6.86 | 7.76 | 9.31 | 8.2   | 8    | 6.75  | 5.92 |
| 201975_at    | CLIP1             | CAP-GLY domain containing linker protein 1                          | 0.694823 | 7.06  | 6.88 | 6.13  | 7.85 | 7.22 | 5.48 | 7.75  | 6.66 | 7.68  | 4.66 |
| 236404_at    | ---               | ---                                                                 | 0.694928 | 7.53  | 6.94 | 4.37  | 7.27 | 7.37 | 5.28 | 7.27  | 6.86 | 7.21  | 6.85 |
| 1553608_a_at | C21orf109         | chromosome 21 open reading frame 109                                | 0.694979 | 8.38  | 7.95 | 6.48  | 7.4  | 7.11 | 7.28 | 5.18  | 6.01 | 7.48  | 8.29 |
| 216056_at    | CD44              | CD44 molecule (Indian blood group)                                  | 0.695577 | 8.46  | 5.54 | 7.79  | 8.39 | 6.4  | 4    | 7.66  | 6.31 | 6.1   | 3.4  |
| 207332_s_at  | TFRC              | transferrin receptor (p90, CD71)                                    | 0.697797 | 7.12  | 6.52 | 7.81  | 7.4  | 5.98 | 4.92 | 5.37  | 3.36 | 7.28  | 7.13 |
| 225884_s_at  | GZF1              | GDNF-inducible zinc finger protein 1                                | 0.697797 | 7.27  | 6.27 | 7.93  | 7.11 | 6.45 | 4.44 | 7.11  | 6.33 | 5.45  | 4.34 |
| 206379_at    | EYA3              | eyes absent homolog 3 (Drosophila)                                  | 0.697841 | 6.92  | 7.15 | 9.03  | 6.34 | 7.49 | 8.53 | 7.9   | 6.7  | 7.03  | 5.25 |
| 220701_at    | ---               | ---                                                                 | 0.698224 | 8     | 8.19 | 7.77  | 7.63 | 5.55 | 5.11 | 7.59  | 6.42 | 7.58  | 7.25 |
|              |                   | zinc finger family member 673 /// zinc finger family member 674     |          |       |      |       |      |      |      |       |      |       |      |
| 1554465_s_at | ZNF673 /// ZNF674 | zinc finger family member 673 /// zinc finger family member 674     | 0.698307 | 7.89  | 8.22 | 7.87  | 7.81 | 7.58 | 8.1  | 7.29  | 5.45 | 7.46  | 5.55 |
|              |                   | membrane protein, palmitoylated 7 (MAGUK p55 subfamily member 7)    |          |       |      |       |      |      |      |       |      |       |      |
| 238451_at    | MPP7              | membrane protein, palmitoylated 7 (MAGUK p55 subfamily member 7)    | 0.698798 | 6.63  | 6.27 | 5.37  | 6.56 | 7.39 | 5.04 | 8.45  | 8.28 | 7.09  | 6.01 |
|              |                   | serpin peptidase inhibitor, clade A (alpha-1 antitrypsin, member 7) |          |       |      |       |      |      |      |       |      |       |      |
| 230318_at    | SERPINA1          | serpin peptidase inhibitor, clade A (alpha-1 antitrypsin), member 7 | 0.699131 | 7.91  | 5.91 | 8.5   | 8.12 | 7.38 | 7.59 | 6.99  | 5.71 | 6.55  | 5.86 |
| 229303_at    | ---               | ---                                                                 | 0.700213 | 7.64  | 8.11 | 5.37  | 8.23 | 7.93 | 4.09 | 7.51  | 7.43 | 7.53  | 5.14 |
| 215053_at    | SRCAP             | Snf2-related CREBBP activator protein                               | 0.700717 | 6.29  | 4.64 | 4.38  | 4.62 | 4.44 | 3.7  | 6.2   | 7.12 | 5.3   | 4.69 |
| 242258_at    | ---               | ---                                                                 | 0.700886 | 6.03  | 6.62 | 3.87  | 6.22 | 6.92 | 5.42 | 4.59  | 4.4  | 4.42  | 2.78 |
| 227609_at    | EPSTI1            | epithelial stromal interaction 1 (breast)                           | 0.700886 | 4.34  | 5.68 | 7.25  | 7.76 | 7.9  | 6.46 | 6.17  | 4.45 | 7.23  | 5.84 |



|              |                                         |                                                                                                                           |          |      |      |      |      |      |       |       |       |      |      |
|--------------|-----------------------------------------|---------------------------------------------------------------------------------------------------------------------------|----------|------|------|------|------|------|-------|-------|-------|------|------|
| 221823_at    | C5orf30                                 | chromosome 5 open reading frame 30                                                                                        | 0.700886 | 5.1  | 5.51 | 5.14 | 5.75 | 6.2  | 7.61  | 5.13  | 7.25  | 4.81 | 4.73 |
| 230352_at    | PRPS2                                   | Phosphoribosyl pyrophosphate synthetase 2                                                                                 | 0.701013 | 3.68 | 3.49 | 4.17 | 5.7  | 5.84 | 6.61  | 5.23  | 6.31  | 5.81 | 7.17 |
| 230871_at    | DHX30                                   | DEAH (Asp-Glu-Ala-His) box polypeptide 30                                                                                 | 0.701608 | 3.8  | 6.61 | 6.69 | 4.36 | 6.18 | 6.74  | 3.57  | 4.25  | 4.47 | 3.48 |
| 228071_at    | GIMAP7                                  | GTPase, IMAP family member 7                                                                                              | 0.701901 | 5.58 | 6.84 | 3.76 | 6.01 | 8.13 | 9.53  | 9.15  | 8.96  | 7.15 | 6.64 |
| 220814_at    | ---                                     | ---                                                                                                                       | 0.70333  | 9.09 | 8.91 | 5.89 | 8.03 | 6.17 | 7.09  | 7.16  | 6.85  | 8.01 | 4.65 |
| 243827_at    | ---                                     | ---                                                                                                                       | 0.703767 | 7.07 | 5.13 | 5    | 6.22 | 3.83 | 3.94  | 6.48  | 4.31  | 6.95 | 4.79 |
| 1554494_at   | MTHFSD                                  | methenyltetrahydrofolate synthetase domain containing                                                                     | 0.703926 | 6.84 | 6.1  | 3.39 | 7.2  | 6.78 | 4.75  | 5.66  | 8.43  | 6.7  | 7.49 |
| 1554462_a_at | DNAJB9                                  | DnaJ (Hsp40) homolog, subfamily B, member 9                                                                               | 0.704138 | 8.11 | 5.91 | 9.1  | 8.96 | 7.51 | 7.69  | 7.22  | 4.71  | 7.9  | 6.68 |
| 217776_at    | RDH11                                   | retinol dehydrogenase 11 (all-trans/9-cis/11-cis)<br>BRCA1 associated protein-1 (ubiquitin carboxy-terminal<br>hydrolase) | 0.704138 | 4.19 | 6.55 | 3.8  | 4.81 | 6.73 | 7.1   | 6.43  | 7.35  | 5.92 | 6.23 |
| 201419_at    | BAP1                                    | chromosome 10 open reading frame 118                                                                                      | 0.704409 | 5.87 | 5.61 | 6.44 | 5.71 | 5.42 | 5.91  | 5.87  | 10.22 | 6.95 | 5.74 |
| 216033_s_at  | FYN                                     | FYN oncogene related to SRC, FGR, YES                                                                                     | 0.704504 | 5.18 | 4.84 | 4.19 | 5.96 | 5.51 | 6.44  | 8.02  | 7.16  | 5.87 | 5.34 |
| 214452_at    | BCAT1                                   | branched chain aminotransferase 1, cytosolic                                                                              | 0.704507 | 6.22 | 6.32 | 4.29 | 6.86 | 3.22 | 3.82  | 4.63  | 6.75  | 6    | 6.67 |
| 209728_at    | HLA-DRB4                                | major histocompatibility complex, class II, DR beta 4                                                                     | 0.70515  | 5.07 | 6.8  | 9.87 | 9.22 | 7.88 | 10.28 | 8.58  | 9.38  | 6.63 | 6.4  |
| 232931_at    | SNRNP200                                | small nuclear ribonucleoprotein 200kDa (U5)                                                                               | 0.70515  | 5.35 | 4.42 | 7.2  | 6.74 | 4.54 | 6.32  | 4.84  | 8.01  | 5.74 | 8.09 |
| 230075_at    | RAB39B                                  | RAB39B, member RAS oncogene family                                                                                        | 0.70515  | 5.63 | 6.92 | 7.46 | 4.71 | 6.17 | 5.6   | 7.51  | 6.28  | 5.19 | 4.34 |
| 216062_at    | ---                                     | ---                                                                                                                       | 0.705928 | 8.7  | 6.48 | 8.07 | 8.93 | 6.62 | 5.28  | 8.18  | 6.78  | 6.71 | 4.07 |
| 227701_at    | C10orf118                               | chromosome 10 open reading frame 118                                                                                      | 0.705928 | 7.32 | 7.41 | 4.17 | 6.49 | 7.47 | 5.36  | 6.63  | 6.44  | 5.73 | 3.58 |
| 229327_s_at  | ---                                     | ---                                                                                                                       | 0.706697 | 6.01 | 5.51 | 3.76 | 6.69 | 7.22 | 7.34  | 7.7   | 5.44  | 4.29 | 4.48 |
| 212690_at    | DDHD2                                   | DDHD domain containing 2                                                                                                  | 0.706728 | 3.64 | 5.08 | 2.34 | 3.04 | 6.25 | 3.87  | 6.62  | 4.01  | 4.37 | 6.64 |
| 1562307_at   | ---                                     | ---                                                                                                                       | 0.707805 | 8.5  | 6.92 | 5.2  | 6.91 | 6.63 | 5.74  | 7.45  | 5.83  | 6.01 | 5.39 |
| 205733_at    | BLM                                     | Bloom syndrome, RecQ helicase-like                                                                                        | 0.708249 | 5.31 | 5.26 | 6.26 | 6.15 | 6.3  | 8.42  | 5.85  | 6.35  | 6.49 | 9.08 |
| 209629_s_at  | NXT2                                    | nuclear transport factor 2-like export factor 2                                                                           | 0.708274 | 6.8  | 4.82 | 6.2  | 6.48 | 7.15 | 8.37  | 6.5   | 7.87  | 5.84 | 5.4  |
| 213956_at    | CEP350                                  | centrosomal protein 350kDa                                                                                                | 0.708318 | 7.16 | 7.68 | 4.37 | 6.66 | 6.19 | 4.12  | 5.69  | 4.79  | 6.84 | 5.98 |
| 228570_at    | BTBD11                                  | BTB (POZ) domain containing 11                                                                                            | 0.708434 | 6.16 | 6.17 | 3.45 | 4.93 | 5.23 | 3.87  | 5.58  | 3.05  | 6.55 | 6.18 |
| 200855_at    | C20orf191 ///<br>LOC100133918 /// NCOR1 | chromosome 20 open reading frame 191 /// similar to nuclear<br>receptor co-represso                                       | 0.708593 | 7.32 | 6.93 | 4.76 | 7.02 | 7.43 | 5.82  | 7.28  | 8.52  | 7.85 | 4.24 |
| 217828_at    | SLTM                                    | SAFB-like, transcription modulator                                                                                        | 0.708593 | 7.92 | 8.08 | 5.19 | 7.36 | 8.12 | 5.76  | 7.63  | 7.15  | 7.59 | 5.92 |
| 208003_s_at  | NFAT5                                   | nuclear factor of activated T-cells 5, tonicity-responsive                                                                | 0.708593 | 6.07 | 5.54 | 6.08 | 7.34 | 5.83 | 6.5   | 6     | 3.19  | 7.11 | 5.87 |
| 226170_at    | EYA3                                    | eyes absent homolog 3 (Drosophila)                                                                                        | 0.708714 | 7.74 | 7.99 | 7.32 | 6.72 | 7.16 | 6.86  | 7.58  | 6.76  | 7.54 | 3.91 |
| 243559_at    | ---                                     | ---                                                                                                                       | 0.708714 | 6.27 | 6.14 | 4.55 | 4.88 | 3.97 | 4.28  | 6.04  | 3.61  | 6.09 | 6.37 |
| 1557719_at   | PIKFYVE                                 | phosphoinositide kinase, FYVE finger containing                                                                           | 0.708982 | 7.58 | 6.73 | 5.7  | 6.64 | 6.47 | 6.33  | 6.16  | 5.42  | 8.01 | 4.25 |
| 205239_at    | AREG                                    | amphiregulin                                                                                                              | 0.709904 | 5.23 | 3.16 | 6.4  | 6.23 | 5.18 | 2.34  | 3.66  | 3.68  | 6.41 | 3.2  |
| 214042_s_at  | RPL22                                   | ribosomal protein L22                                                                                                     | 0.709966 | 8.3  | 9.43 | 7.04 | 8.62 | 9.31 | 11.56 | 10.68 | 10.57 | 9.36 | 9.62 |
| 1564637_a_at | FAM98B                                  | family with sequence similarity 98, member B                                                                              | 0.710482 | 5.26 | 4.99 | 2.51 | 4.79 | 5.3  | 6.66  | 7.47  | 6.05  | 5.28 | 2.56 |
| 204440_at    | CD83                                    | CD83 molecule                                                                                                             | 0.711726 | 8.61 | 5.96 | 7.71 | 8.3  | 7.46 | 4.49  | 7.5   | 6.22  | 8.29 | 4.28 |
| 211657_at    | CEACAM6                                 | carcinoembryonic antigen-related cell adhesion molecule 6<br>(non-specific cross re                                       | 0.711726 | 4.21 | 4.1  | 4.35 | 4.08 | 7.19 | 6.51  | 5.57  | 9.23  | 5.22 | 7.56 |
| 215669_at    | HLA-DRB4                                | major histocompatibility complex, class II, DR beta 4                                                                     | 0.712032 | 3.26 | 4    | 7.1  | 6.42 | 3.91 | 6.16  | 5.81  | 5.77  | 4.26 | 4    |
| 244137_at    | KIAA0317                                | KIAA0317                                                                                                                  | 0.713086 | 5.96 | 4.32 | 4.18 | 6.17 | 4.35 | 3.85  | 5.45  | 4.3   | 6.34 | 6.22 |
| 214314_s_at  | EIF5B                                   | eukaryotic translation initiation factor 5B                                                                               | 0.713521 | 6.48 | 6.78 | 3.3  | 6.64 | 7.85 | 6.58  | 6.76  | 7.01  | 7.09 | 3.61 |

|              |                                                                     |                                                                                     |          |      |      |      |      |       |       |       |      |      |      |
|--------------|---------------------------------------------------------------------|-------------------------------------------------------------------------------------|----------|------|------|------|------|-------|-------|-------|------|------|------|
| 215533_s_at  | UBE4B                                                               | ubiquitination factor E4B (UFD2 homolog, yeast)                                     | 0.714171 | 7.31 | 7.84 | 6.11 | 6.7  | 7.61  | 6.16  | 7.38  | 7.48 | 6.72 | 4.41 |
| 240941_at    | ITSN2                                                               | Intersectin 2                                                                       | 0.714291 | 9.52 | 8.59 | 6.33 | 8.29 | 8.54  | 9.12  | 9.08  | 9.23 | 9.64 | 7.51 |
| 243751_at    | ---                                                                 | ---                                                                                 | 0.714418 | 5.94 | 5.16 | 6.84 | 6.52 | 5.18  | 4.17  | 4.07  | 3.73 | 7.11 | 4.11 |
| 1560154_a_at | ---                                                                 | ---                                                                                 | 0.714492 | 5.69 | 6.66 | 3.42 | 5.71 | 6.25  | 3.93  | 6.91  | 4.28 | 4.56 | 4.06 |
| 205367_at    | SH2B2                                                               | SH2B adaptor protein 2                                                              | 0.714972 | 7.75 | 7.42 | 9.24 | 7.98 | 7.43  | 4.43  | 7.22  | 7.01 | 7.61 | 5.17 |
| 211986_at    | AHNAK                                                               | AHNAK nucleoprotein                                                                 | 0.715196 | 7.04 | 7.41 | 6.94 | 7.34 | 8.18  | 8.3   | 10.34 | 9.1  | 7.48 | 6.21 |
| 212929_s_at  | FAM21A /// FAM21B ///<br>FAM21C /// FAM21D                          | family with sequence similarity 21, member A /// family with<br>sequence similarity | 0.715343 | 8.76 | 9.66 | 5.78 | 8.75 | 10.02 | 8.74  | 9.64  | 10.1 | 9.67 | 6.86 |
| 241891_at    | ---                                                                 | ---                                                                                 | 0.715736 | 7.34 | 6.2  | 4.3  | 6.78 | 5.07  | 3.64  | 5.38  | 4.75 | 6.28 | 6.34 |
| 1554665_at   | ZNF586                                                              | zinc finger protein 586                                                             | 0.715903 | 7.08 | 6.86 | 4.72 | 6.95 | 5.79  | 4.08  | 6.27  | 5.17 | 5.98 | 5.15 |
| 212009_s_at  | STIP1                                                               | stress-induced-phosphoprotein 1                                                     | 0.717042 | 7.58 | 8.87 | 7.42 | 7.36 | 7.34  | 7.15  | 9.39  | 7.4  | 7.74 | 5.34 |
| 209849_s_at  | RAD51C                                                              | RAD51 homolog C (S. cerevisiae)                                                     | 0.717922 | 6.09 | 7.46 | 5.66 | 4.72 | 5.61  | 6.12  | 6.85  | 7.13 | 4.18 | 5.58 |
| 240050_s_at  | ---                                                                 | ---                                                                                 | 0.718089 | 5.52 | 8.09 | 3.71 | 5.05 | 7.78  | 7.27  | 6.56  | 6.34 | 7.19 | 3.57 |
| 205101_at    | CIITA                                                               | class II, major histocompatibility complex, transactivator                          | 0.718089 | 5.29 | 8.24 | 3.7  | 5.64 | 7.52  | 7.27  | 7.48  | 5.93 | 8    | 7.78 |
| 1565868_at   | CD44                                                                | CD44 molecule (Indian blood group)                                                  | 0.718218 | 8.06 | 5.92 | 7.44 | 8.45 | 6.21  | 5.67  | 7.39  | 6.4  | 5.92 | 5.28 |
| 221274_s_at  | LMAN2L                                                              | lectin, mannose-binding 2-like                                                      | 0.718218 | 5.5  | 6.82 | 6.39 | 5.84 | 6.73  | 8.84  | 5.3   | 7.48 | 5.81 | 7.28 |
| 236384_at    | ---                                                                 | ---                                                                                 | 0.718218 | 6.37 | 7.48 | 7.37 | 5.92 | 6.27  | 4.89  | 5.68  | 4.82 | 6.17 | 4.49 |
| 212707_s_at  | LOC100133005 ///<br>LOC100134722 /// RASA4<br>/// RASA4B /// RASA4P | RAS p21 protein activator 4 pseudogene /// similar to HSPC047<br>protein /// RAS p2 | 0.718218 | 8.4  | 8.8  | 6.11 | 6.14 | 7.18  | 9.05  | 7.91  | 7.4  | 6.64 | 6.34 |
| 228271_at    | ---                                                                 | ---                                                                                 | 0.718407 | 7.91 | 7.24 | 5.56 | 7.86 | 6.68  | 5.14  | 6.47  | 5.22 | 7.03 | 4.72 |
| 208536_s_at  | BCL2L11                                                             | BCL2-like 11 (apoptosis facilitator)                                                | 0.718462 | 8.84 | 7.61 | 8.64 | 8.15 | 8.48  | 5.08  | 7.44  | 8.62 | 7.38 | 7.91 |
| 201948_at    | GNL2                                                                | guanine nucleotide binding protein-like 2 (nucleolar)                               | 0.718545 | 7.29 | 6.16 | 6.87 | 6.75 | 7.34  | 8.32  | 8.27  | 6.29 | 7.24 | 4.46 |
| 236506_at    | ---                                                                 | ---                                                                                 | 0.718856 | 7.6  | 8.1  | 4.24 | 7.23 | 6.81  | 4.58  | 6.53  | 4.55 | 7.28 | 5.87 |
| 241249_at    | LOC253039                                                           | hypothetical LOC253039                                                              | 0.718962 | 7.95 | 7.8  | 6.83 | 6.78 | 7.11  | 5.46  | 4.81  | 5.43 | 7.29 | 6.7  |
| 1552485_at   | LACTB                                                               | lactamase, beta                                                                     | 0.719202 | 6.19 | 5.03 | 7.69 | 7.04 | 5.5   | 5.1   | 7.81  | 5.76 | 6.58 | 5.33 |
| 224841_x_at  | GAS5                                                                | growth arrest-specific 5 (non-protein coding)                                       | 0.719206 | 8.38 | 8.41 | 6.36 | 7.53 | 8.62  | 10.02 | 9.97  | 8.82 | 8.36 | 7.82 |
| 241331_at    | SKAP2                                                               | Src kinase associated phosphoprotein 2                                              | 0.719443 | 6.06 | 6.22 | 7.6  | 5.69 | 4.68  | 6.16  | 4.11  | 4.82 | 5.1  | 6.85 |
| 243931_at    | ---                                                                 | ---                                                                                 | 0.719897 | 6.8  | 5.47 | 6.24 | 7.11 | 5.5   | 5.35  | 4.95  | 3.65 | 6.91 | 6.18 |
| 209271_at    | BPTF                                                                | bromodomain PHD finger transcription factor                                         | 0.719977 | 6.46 | 6.55 | 3.96 | 6.14 | 6.58  | 4.01  | 5.66  | 5.57 | 6.71 | 4.5  |
| 229810_at    | ---                                                                 | ---                                                                                 | 0.720156 | 6.18 | 6.69 | 4.39 | 7.27 | 6.65  | 4.86  | 4.83  | 6.02 | 7.39 | 4.49 |
| 202890_at    | MAP7                                                                | microtubule-associated protein 7                                                    | 0.720456 | 7.5  | 7.93 | 3.67 | 5.61 | 7.38  | 7.68  | 7     | 6.82 | 8.49 | 8.73 |
| 218558_s_at  | MRPL39                                                              | mitochondrial ribosomal protein L39                                                 | 0.722011 | 5.62 | 6.64 | 6    | 5.28 | 7.18  | 4.97  | 7.78  | 4.83 | 5.93 | 3.55 |
| 211517_s_at  | IL5RA                                                               | interleukin 5 receptor, alpha                                                       | 0.722011 | 6.68 | 7.04 | 6.89 | 7.33 | 9.29  | 9.4   | 7.64  | 9.2  | 8.7  | 8.99 |
| 1553103_at   | NFX1                                                                | nuclear transcription factor, X-box binding 1                                       | 0.722011 | 6.57 | 5.9  | 3.32 | 4.76 | 5.47  | 5.86  | 5.4   | 6.46 | 6.29 | 3.45 |
| 228416_at    | ACVR2A                                                              | activin A receptor, type IIA                                                        | 0.722011 | 6.25 | 5.61 | 4.03 | 6.12 | 6.59  | 3     | 5.92  | 7.18 | 5.57 | 4.37 |
| 207315_at    | CD226                                                               | CD226 molecule                                                                      | 0.722512 | 4.58 | 3.51 | 4.63 | 6.22 | 6.41  | 9.19  | 7.39  | 7.69 | 6.93 | 6.91 |
| 204148_s_at  | POMZP3 /// ZP3                                                      | POM (POM121 homolog, rat) and ZP3 fusion /// zona pellucida<br>glycoprotein 3 (sper | 0.722512 | 5.92 | 6.9  | 7.03 | 6.46 | 4.27  | 4.01  | 6.32  | 6.98 | 5.01 | 4.07 |
| 233587_s_at  | SIPA1L2                                                             | signal-induced proliferation-associated 1 like 2                                    | 0.722512 | 8.48 | 8.81 | 7.93 | 9.16 | 8.57  | 6.1   | 8.11  | 7.69 | 8.66 | 6.42 |
| 206548_at    | ---                                                                 | ---                                                                                 | 0.722915 | 8.43 | 8.23 | 3.45 | 5.99 | 7.06  | 8.12  | 7.93  | 3.83 | 7.84 | 6.22 |

|              |                        |                                                           |          |      |      |      |      |      |       |       |      |       |       |
|--------------|------------------------|-----------------------------------------------------------|----------|------|------|------|------|------|-------|-------|------|-------|-------|
| 224989_at    | ---                    | ---                                                       | 0.722915 | 5.8  | 4.93 | 5.55 | 7.47 | 5.55 | 5.93  | 7.01  | 6.59 | 6.02  | 3.97  |
| 204075_s_at  | KIAA0562               | KIAA0562                                                  | 0.723454 | 6.69 | 7.17 | 4.63 | 5.87 | 7.8  | 5.74  | 5.81  | 4.97 | 6.63  | 5.21  |
| 225260_s_at  | MRPL32                 | mitochondrial ribosomal protein L32                       | 0.723631 | 4.78 | 5.33 | 4.01 | 4.16 | 5.3  | 6.92  | 6.11  | 7.47 | 4.67  | 5.6   |
| 216574_s_at  | hCG_2024410 /// RPE    | rcRPE /// ribulose-5-phosphate-3-epimerase                | 0.723766 | 6.13 | 6.54 | 5.08 | 6.83 | 7.36 | 7.48  | 7.73  | 9.53 | 7.28  | 8.67  |
| 223404_s_at  | C1orf25                | chromosome 1 open reading frame 25                        | 0.723832 | 6.49 | 6.97 | 5.05 | 6.28 | 7.59 | 7.12  | 6.42  | 7.09 | 5.25  | 8.54  |
| 205763_s_at  | DDX18                  | DEAD (Asp-Glu-Ala-Asp) box polypeptide 18                 | 0.723942 | 8.13 | 6.39 | 5.23 | 7.14 | 6.97 | 8.1   | 7.86  | 5.87 | 8.78  | 6.35  |
| 225925_s_at  | USP48                  | ubiquitin specific peptidase 48                           | 0.724064 | 7.29 | 6.67 | 5.47 | 7.16 | 7.21 | 5.16  | 5.75  | 4.31 | 5.87  | 7.59  |
| 220942_x_at  | FAM162A                | family with sequence similarity 162, member A             | 0.724309 | 5.64 | 5.72 | 5.14 | 4.65 | 4.92 | 7.64  | 5.86  | 6.47 | 6.79  | 7.37  |
| 242752_at    | ---                    | ---                                                       | 0.725312 | 5.4  | 7.69 | 3.77 | 5.11 | 7.37 | 7     | 6.69  | 6.34 | 6.98  | 4.45  |
| 218400_at    | OAS3                   | 2'-5'-oligoadenylate synthetase 3, 100kDa                 | 0.725312 | 7.22 | 6.92 | 6.67 | 8.51 | 8.87 | 7.78  | 6.88  | 4.94 | 8.9   | 6.84  |
| 241590_at    | ---                    | ---                                                       | 0.725312 | 6.49 | 6.82 | 2.67 | 6.2  | 6.28 | 5.74  | 5.92  | 5.69 | 6.72  | 5.74  |
| 242878_at    | ---                    | ---                                                       | 0.725312 | 6.36 | 5.97 | 7.59 | 7.7  | 6.53 | 6.24  | 5.31  | 4.47 | 5.79  | 7.39  |
|              |                        | protein kinase, cAMP-dependent, regulatory, type I, alpha |          |      |      |      |      |      |       |       |      |       |       |
| 242482_at    | PRKAR1A                | (tissue specific extin                                    | 0.725372 | 8.48 | 7.1  | 8.01 | 9.11 | 7.61 | 5.83  | 7.95  | 6.45 | 8.14  | 8.73  |
| 202643_s_at  | TNFAIP3                | tumor necrosis factor, alpha-induced protein 3            | 0.72602  | 8    | 7.13 | 8.58 | 9.4  | 8.47 | 5.72  | 7.87  | 5.9  | 8.61  | 5.58  |
| 239597_at    | ---                    | ---                                                       | 0.726108 | 6.95 | 4.88 | 5.13 | 5.52 | 5.52 | 8.65  | 5.48  | 4.92 | 7.69  | 6.48  |
| 212737_at    | GM2A                   | GM2 ganglioside activator                                 | 0.726377 | 6.84 | 8.03 | 9.2  | 9.94 | 7.17 | 7.74  | 9.28  | 9.05 | 6.49  | 6.36  |
| 202605_at    | GUSB                   | glucuronidase, beta                                       | 0.72646  | 8.95 | 9.36 | 6.92 | 6.98 | 9.92 | 8.79  | 8.31  | 9.78 | 9.01  | 10.18 |
| 210732_s_at  | LGALS8                 | lectin, galactoside-binding, soluble, 8                   | 0.726483 | 7.38 | 7.24 | 8.79 | 8.78 | 7.49 | 5.32  | 5.35  | 4.31 | 6.91  | 7.3   |
| 1555193_a_at | ZNF277                 | zinc finger protein 277                                   | 0.726852 | 5.92 | 4.97 | 8.87 | 6.38 | 5.33 | 5.95  | 6.81  | 6.08 | 6.39  | 5.33  |
| 235618_at    | ZNF507                 | zinc finger protein 507                                   | 0.727066 | 6.64 | 5.46 | 3.5  | 4.44 | 6.99 | 4.79  | 6.26  | 6.24 | 5.85  | 5.64  |
|              |                        | V-akt murine thymoma viral oncogene homolog 3 (protein    |          |      |      |      |      |      |       |       |      |       |       |
| 212609_s_at  | AKT3                   | kinase B, gamma)                                          | 0.727586 | 6.97 | 7.4  | 5.2  | 5.86 | 8.43 | 4.88  | 7.38  | 7.51 | 6.4   | 6.2   |
| 202566_s_at  | SVIL                   | supervillin                                               | 0.727848 | 8.87 | 8.6  | 5.84 | 8.03 | 7.76 | 7.67  | 7.36  | 7.1  | 8.19  | 5.35  |
| 207594_s_at  | SYNJ1                  | synaptojanin 1                                            | 0.728055 | 7.15 | 7.01 | 8.18 | 7    | 6.33 | 5.73  | 5.08  | 4.64 | 5.71  | 5.09  |
| 221830_at    | RAP2A                  | RAP2A, member of RAS oncogene family                      | 0.728073 | 4.91 | 4.79 | 4.91 | 5.98 | 5.9  | 5.93  | 6.95  | 8.29 | 6.15  | 5.29  |
| 216933_x_at  | APC                    | adenomatous polyposis coli                                | 0.72865  | 9.17 | 9.21 | 8.41 | 9.28 | 9.22 | 5.76  | 9.91  | 8.21 | 10.51 | 9.6   |
| 239811_at    | ---                    | ---                                                       | 0.728759 | 5.42 | 6.22 | 4.64 | 5.47 | 4.98 | 5.56  | 5.49  | 4.16 | 6.36  | 9.24  |
|              | LOC220729 /// SDHA /// | succinate dehydrogenase complex, subunit A, flavoprotein  |          |      |      |      |      |      |       |       |      |       |       |
| 230077_at    | SDHALP1 /// SDHALP2    | pseudogene /// succinat                                   | 0.729643 | 5.95 | 6.05 | 5.24 | 5.65 | 5.77 | 7.5   | 7.08  | 7.95 | 6.23  | 8.19  |
| 210105_s_at  | FYN                    | FYN oncogene related to SRC, FGR, YES                     | 0.730412 | 4.54 | 5.11 | 4.86 | 5.43 | 6.12 | 7.05  | 8.33  | 7.81 | 5.09  | 6.49  |
| 35820_at     | GM2A                   | GM2 ganglioside activator                                 | 0.730849 | 6.4  | 7.39 | 8.87 | 9.44 | 7.02 | 7.32  | 8.86  | 8.58 | 5.86  | 5.98  |
|              |                        |                                                           |          |      |      |      |      |      |       |       |      |       |       |
| 1554447_at   | LOC554203              | alanyl-tRNA synthetase domain containing 1 pseudogene     | 0.730914 | 7.27 | 8.4  | 4.28 | 6.51 | 8.12 | 6.04  | 8.04  | 5.55 | 7.57  | 4.34  |
| 1565598_at   | ---                    | ---                                                       | 0.731012 | 6.72 | 4.98 | 4.85 | 6.84 | 5.55 | 5.1   | 7.04  | 4.36 | 7.08  | 5.27  |
| 203814_s_at  | NQO2                   | NAD(P)H dehydrogenase, quinone 2                          | 0.731096 | 7.43 | 7.4  | 9.23 | 9.18 | 9.45 | 10.15 | 7.45  | 7.56 | 9.31  | 9.54  |
| 209037_s_at  | EHD1                   | EH-domain containing 1                                    | 0.73116  | 7.62 | 7.22 | 9.82 | 8.25 | 7.92 | 7.03  | 7.63  | 5.83 | 8.63  | 5.99  |
| 201540_at    | FHL1                   | four and a half LIM domains 1                             | 0.73116  | 3.25 | 2.13 | 2.99 | 4.48 | 3.73 | 7.54  | 7.02  | 7.96 | 4.24  | 2.66  |
| 53202_at     | C7orf25                | chromosome 7 open reading frame 25                        | 0.73116  | 5.96 | 7.15 | 4.83 | 5.51 | 7.51 | 8.16  | 7.57  | 7.99 | 7.16  | 6.58  |
| 228826_at    | ---                    | ---                                                       | 0.73116  | 4.94 | 5.07 | 5.35 | 5.99 | 6.4  | 7.99  | 4.3   | 7.43 | 7.3   | 7.32  |
| 235858_at    | CREBBP                 | CREB binding protein                                      | 0.73116  | 8.48 | 7.99 | 7.5  | 7.91 | 7.01 | 5.46  | 7.98  | 7.09 | 7.89  | 5.63  |
| 212722_s_at  | JMJD6                  | jumonji domain containing 6                               | 0.731454 | 9.22 | 7.79 | 8.76 | 8.95 | 7.22 | 6.99  | 7.93  | 6.1  | 7.46  | 5.71  |
| 201030_x_at  | LDHB                   | lactate dehydrogenase B                                   | 0.731613 | 7.71 | 7.32 | 5.47 | 7.62 | 9.4  | 9.58  | 10.62 | 8.82 | 8.42  | 8     |
| 241968_at    | ---                    | ---                                                       | 0.732032 | 7.3  | 7.92 | 3.53 | 5.52 | 7.36 | 7.23  | 7.16  | 5.15 | 6.79  | 5.03  |

|              |                     |                                                                                  |          |      |      |       |      |      |       |       |       |       |       |
|--------------|---------------------|----------------------------------------------------------------------------------|----------|------|------|-------|------|------|-------|-------|-------|-------|-------|
| 218237_s_at  | SLC38A1             | solute carrier family 38, member 1                                               | 0.732278 | 5.99 | 7.17 | 4.27  | 6.48 | 6.34 | 7.24  | 6.81  | 3.97  | 7.1   | 6.16  |
| 220934_s_at  | TMEM223             | transmembrane protein 223                                                        | 0.732278 | 4.12 | 6.99 | 4.39  | 4.44 | 4.31 | 6.13  | 4.4   | 3.77  | 3.69  | 6.19  |
| 233515_at    | ---                 | ---                                                                              | 0.733082 | 6.74 | 6.6  | 6.73  | 7.81 | 6.39 | 6.63  | 5.17  | 4.18  | 7     | 6.98  |
| 202198_s_at  | MTMR3               | myotubularin related protein 3                                                   | 0.733194 | 8.6  | 8.39 | 7.7   | 8.49 | 7.96 | 7.31  | 8.45  | 10.12 | 7.73  | 6.18  |
| 240983_s_at  | CARS                | cysteinyl-tRNA synthetase                                                        | 0.733847 | 7.74 | 6.77 | 7.99  | 6.94 | 6.53 | 4.71  | 7.48  | 8.04  | 6.98  | 5.82  |
| 227527_at    | MLL2                | myeloid/lymphoid or mixed-lineage leukemia 2                                     | 0.734095 | 9.83 | 9.29 | 8.67  | 9.42 | 9.48 | 8.81  | 9.63  | 9.27  | 10.19 | 6.49  |
| 225010_at    | CCDC6               | coiled-coil domain containing 6                                                  | 0.734161 | 4.86 | 6.48 | 3.12  | 4.57 | 6.01 | 7.14  | 7.1   | 6.63  | 6     | 5.56  |
| 1552398_a_at | CLEC12A /// CLEC12B | C-type lectin domain family 12, member A /// C-type lectin domain family 12, mem | 0.734921 | 7.4  | 8.14 | 6.64  | 7.19 | 12.7 | 12.33 | 11.86 | 12.12 | 11.33 | 11.6  |
| 209662_at    | CETN3               | centrin, EF-hand protein, 3 (CDC31 homolog, yeast)                               | 0.734921 | 5.26 | 6.56 | 5.35  | 6.04 | 7.52 | 6.98  | 7.74  | 8.49  | 6.78  | 8.48  |
| 237137_at    | SCARNA2             | small Cajal body-specific RNA 2                                                  | 0.734921 | 7.93 | 7.88 | 11.34 | 8.7  | 8.38 | 9.47  | 8.77  | 8.6   | 8.71  | 9.61  |
| 234843_s_at  | KREMEN1             | kringle containing transmembrane protein 1                                       | 0.734921 | 7.67 | 7.09 | 8.33  | 8.45 | 7.89 | 6     | 6.87  | 6.72  | 6.65  | 5.11  |
| 222881_at    | HPSE                | heparanase                                                                       | 0.73512  | 5.28 | 5.99 | 6.92  | 7.42 | 6.78 | 6.78  | 7.96  | 8.82  | 7.18  | 5.81  |
| 237753_at    | ---                 | ---                                                                              | 0.73567  | 7.13 | 7.42 | 4.14  | 7.32 | 7.19 | 7.81  | 8.4   | 6.82  | 6.7   | 4.78  |
| 237442_at    | ---                 | ---                                                                              | 0.735726 | 8.8  | 8.39 | 6.09  | 7.85 | 8.3  | 6.85  | 8.71  | 6.63  | 8.47  | 4.73  |
| 235000_at    | ---                 | ---                                                                              | 0.735726 | 6.9  | 7.16 | 5.23  | 6.94 | 6.22 | 4.22  | 6.54  | 7.02  | 7.56  | 5.18  |
| 235764_at    | ---                 | ---                                                                              | 0.735777 | 7.37 | 7.92 | 7.13  | 7.19 | 8.51 | 5.68  | 7.05  | 7.55  | 5.95  | 8.93  |
| 227761_at    | MYO5A               | myosin VA (heavy chain 12, myoxin)                                               | 0.735971 | 7.44 | 7.15 | 4.27  | 6.88 | 6.95 | 5.46  | 6.55  | 5.1   | 7.06  | 4.11  |
| 45653_at     | KCTD13              | potassium channel tetramerisation domain containing 13                           | 0.736192 | 6.36 | 7.09 | 7.14  | 6.86 | 6.88 | 7.45  | 6.01  | 5.66  | 7.39  | 9.43  |
| 235350_at    | C4orf19             | chromosome 4 open reading frame 19                                               | 0.736442 | 6.3  | 3.13 | 3.19  | 3.98 | 5.61 | 8.16  | 6.13  | 4.05  | 6.55  | 4.47  |
| 225741_at    | THUMPD3             | THUMP domain containing 3                                                        | 0.736511 | 6.9  | 6.5  | 4.24  | 7.36 | 7.52 | 5.32  | 8.13  | 4.76  | 7.71  | 7.29  |
| 240544_at    | ---                 | ---                                                                              | 0.736723 | 6.17 | 5.43 | 2.64  | 6.18 | 2.97 | 2.85  | 6.07  | 4.42  | 6.5   | 4.31  |
| 201033_x_at  | RPLP0               | ribosomal protein, large, P0                                                     | 0.736736 | 6.61 | 7.89 | 4.44  | 6.85 | 8.15 | 9.86  | 9.41  | 8.72  | 7.07  | 8.4   |
| 205001_s_at  | DDX3Y               | DEAD (Asp-Glu-Ala-Asp) box polypeptide 3, Y-linked                               | 0.73711  | 6.12 | 5.45 | 5.86  | 5.61 | 8.8  | 7.97  | 8.76  | 7.69  | 9.3   | 7.64  |
| 219014_at    | PLAC8               | placenta-specific 8                                                              | 0.73711  | 6.99 | 8.45 | 8.41  | 7.07 | 8.44 | 9.41  | 9.26  | 10.37 | 7.79  | 8.71  |
| 201028_s_at  | CD99                | CD99 molecule                                                                    | 0.73711  | 6.36 | 6.34 | 5.3   | 6.49 | 7.06 | 9.03  | 8     | 8.07  | 5.97  | 6.23  |
| 1557078_at   | SLFN5               | schlafen family member 5                                                         | 0.737612 | 6.22 | 6.08 | 4.13  | 6.17 | 6.62 | 5.58  | 6.95  | 4.11  | 5.79  | 4.21  |
| 214948_s_at  | TMF1                | TATA element modulatory factor 1                                                 | 0.737612 | 5.22 | 4.66 | 3.61  | 4.37 | 4.12 | 7.07  | 4.72  | 6.03  | 4.68  | 6.05  |
| 204627_s_at  | ITGB3               | integrin, beta 3 (platelet glycoprotein IIIa, antigen CD61)                      | 0.738268 | 6.39 | 4.63 | 6.17  | 8.33 | 8.74 | 12.15 | 11.03 | 11.94 | 9.98  | 10.58 |
| 243358_at    | IGF1R               | insulin-like growth factor 1 receptor                                            | 0.738268 | 6.32 | 6.28 | 6.39  | 6.9  | 4.64 | 4.16  | 5.14  | 4     | 6.3   | 6.24  |
| 215177_s_at  | ITGA6               | integrin, alpha 6                                                                | 0.73838  | 7.02 | 7.65 | 4.4   | 7.08 | 8.51 | 8.22  | 8.1   | 7.07  | 7.89  | 5.54  |
| 1556865_at   | ---                 | ---                                                                              | 0.738423 | 8.7  | 6.91 | 8.02  | 8.08 | 4.57 | 5.25  | 6.79  | 4.32  | 7.12  | 7.67  |
| 1555387_at   | UBA1                | ubiquitin-like modifier activating enzyme 1                                      | 0.73854  | 4.86 | 3.08 | 7.88  | 5.3  | 4.35 | 8.18  | 3.89  | 8.27  | 4.6   | 5.11  |
| 216112_at    | ---                 | ---                                                                              | 0.73854  | 7.52 | 6.67 | 4.68  | 6.65 | 5.41 | 5.26  | 5.5   | 5.88  | 8.01  | 4.95  |
| 222417_s_at  | SNX5                | sorting nexin 5                                                                  | 0.73907  | 6.32 | 6.68 | 2.96  | 6.04 | 7.18 | 8.16  | 5.96  | 6.85  | 7.64  | 6.75  |
| 215343_at    | CCDC88C             | coiled-coil domain containing 88C                                                | 0.739496 | 4.01 | 6.27 | 5.28  | 4.15 | 3.65 | 7.81  | 4.16  | 6.51  | 3.58  | 4.2   |
| 1563118_at   | ---                 | ---                                                                              | 0.740397 | 5.31 | 5.64 | 5.45  | 6.64 | 6.6  | 3.84  | 5.35  | 4.46  | 6.35  | 3.45  |
| 1557100_s_at | HECTD1              | HECT domain containing 1                                                         | 0.740397 | 7.59 | 6.58 | 3.72  | 5.9  | 5.66 | 6.41  | 6.01  | 5.66  | 5.66  | 4.22  |
| 204938_s_at  | PLN                 | phospholamban                                                                    | 0.740542 | 5.92 | 3.56 | 3.28  | 5.83 | 6.16 | 6.42  | 6.88  | 4.09  | 6.6   | 4.04  |
| 218649_x_at  | SDCCAG1             | serologically defined colon cancer antigen 1                                     | 0.740678 | 7.92 | 8.39 | 5.79  | 7.3  | 7.72 | 8.48  | 8.16  | 5.28  | 7.78  | 6.14  |
| 1559911_at   | ---                 | ---                                                                              | 0.740872 | 7.76 | 5.32 | 6.18  | 6.33 | 5.12 | 6.28  | 6.69  | 5.27  | 7.52  | 3.91  |
| 207389_at    | GP1BA               | glycoprotein Ib (platelet), alpha polypeptide                                    | 0.740972 | 6.32 | 5.99 | 6.74  | 5.96 | 7.63 | 9.29  | 7.63  | 8.61  | 7.86  | 8.28  |

|              |                       |                                                                                                                                  |          |       |       |      |       |       |       |       |       |       |       |
|--------------|-----------------------|----------------------------------------------------------------------------------------------------------------------------------|----------|-------|-------|------|-------|-------|-------|-------|-------|-------|-------|
| 235281_x_at  | AHNAK                 | AHNAK nucleoprotein                                                                                                              | 0.741209 | 7     | 7.43  | 5.31 | 6.99  | 7.69  | 7.59  | 9.63  | 8.64  | 7.83  | 5.37  |
| 232366_at    | KIAA0232              | KIAA0232                                                                                                                         | 0.741357 | 5.14  | 4.39  | 6.92 | 6.16  | 4.97  | 2.57  | 4.41  | 2.33  | 5     | 6.18  |
| 222023_at    | AKAP13                | A kinase (PRKA) anchor protein 13                                                                                                | 0.741357 | 7.37  | 5.44  | 6.5  | 6.26  | 4.93  | 4.34  | 6.08  | 4.38  | 4.72  | 4.49  |
| 214048_at    | MBD4                  | methyl-CpG binding domain protein 4                                                                                              | 0.742084 | 7.39  | 5.47  | 4.75 | 6.62  | 6.13  | 3.62  | 3.85  | 4.26  | 5.77  | 6.61  |
| 219108_x_at  | DDX27 /// SS18        | DEAD (Asp-Glu-Ala-Asp) box polypeptide 27 /// synovial sarcoma translocation, ch                                                 | 0.74285  | 8.64  | 8.27  | 5.19 | 7.39  | 8.32  | 7.62  | 7.71  | 8.27  | 8.46  | 6.74  |
| 208962_s_at  | FADS1                 | fatty acid desaturase 1                                                                                                          | 0.742869 | 4.16  | 4.3   | 4.7  | 4.93  | 5.28  | 7.02  | 7.27  | 5.49  | 6.03  | 4.08  |
| 1553162_x_at | C19orf55              | chromosome 19 open reading frame 55                                                                                              | 0.743237 | 8.95  | 8.85  | 8.39 | 9.23  | 9.42  | 8.15  | 7.72  | 7.76  | 8.7   | 5.53  |
| 227080_at    | ZNF697                | zinc finger protein 697                                                                                                          | 0.743947 | 6.32  | 6.1   | 3.85 | 3.79  | 5.43  | 6.86  | 5.02  | 5.77  | 4.39  | 2.94  |
| 36711_at     | MAFF                  | v-maf musculoaponeurotic fibrosarcoma oncogene homolog F (avian)                                                                 | 0.744199 | 8.2   | 4.94  | 9.21 | 9.5   | 7.34  | 5.78  | 8.26  | 6.31  | 8.34  | 7.82  |
| 200788_s_at  | PEA15                 | phosphoprotein enriched in astrocytes 15                                                                                         | 0.744199 | 6.54  | 7.96  | 6.71 | 6.79  | 8.47  | 9.87  | 9.52  | 10.06 | 7.46  | 7.03  |
| 1557820_at   | AFG3L2                | AFG3 ATPase family gene 3-like 2 (yeast)                                                                                         | 0.744221 | 5.76  | 7.07  | 4.46 | 4.5   | 6.29  | 7.54  | 4.96  | 7.58  | 4.77  | 4.93  |
| 223681_s_at  | INADL                 | InaD-like (Drosophila)                                                                                                           | 0.744722 | 2.99  | 4.28  | 2.88 | 4.2   | 6     | 2.58  | 5.61  | 8.13  | 4.04  | 6.04  |
| 215361_at    | ---                   | ---                                                                                                                              | 0.744722 | 9.04  | 8.78  | 5.01 | 7.83  | 7.94  | 5.32  | 8.44  | 6.1   | 8.89  | 6.42  |
| 212780_at    | SOS1                  | son of sevenless homolog 1 (Drosophila)                                                                                          | 0.744722 | 6.43  | 7.15  | 3.54 | 5.37  | 5.61  | 3.75  | 6.1   | 5.55  | 5.44  | 3.79  |
| 238190_at    | TUFM                  | Tu translation elongation factor, mitochondrial similar to HIV TAT specific factor 1; cofactor required for Tat activation of HI | 0.744722 | 4.84  | 6.69  | 4.43 | 5.47  | 4.65  | 4.4   | 7.32  | 4.32  | 6.17  | 4.25  |
| 1558882_at   | LOC401233             | activation of HI                                                                                                                 | 0.744835 | 7.35  | 6.54  | 6.18 | 7.88  | 6.46  | 5.45  | 3.74  | 5.25  | 5.58  | 5.1   |
| 211972_x_at  | RPLP0                 | ribosomal protein, large, P0                                                                                                     | 0.745149 | 6.8   | 7.9   | 4.46 | 6.85  | 8.46  | 10.08 | 9.4   | 8.84  | 7.09  | 8.36  |
| 243319_at    | ---                   | ---                                                                                                                              | 0.745752 | 5.53  | 3.39  | 6.61 | 4.16  | 5.97  | 3.95  | 2.9   | 7.56  | 4.61  | 6.38  |
| 242706_s_at  | MED23                 | mediator complex subunit 23                                                                                                      | 0.745752 | 6.92  | 5.67  | 3.65 | 6.03  | 6.32  | 7.54  | 5.35  | 5.4   | 6.07  | 4.81  |
| 201294_s_at  | WSB1                  | WD repeat and SOCS box-containing 1                                                                                              | 0.745752 | 8     | 8.68  | 9.51 | 8.76  | 7.46  | 7.53  | 6.49  | 6.7   | 8.58  | 9.16  |
| 1568836_at   | CLK4                  | CDC-like kinase 4                                                                                                                | 0.745887 | 6.19  | 7.44  | 8.45 | 7.72  | 5.68  | 7.55  | 6.29  | 7.86  | 6.95  | 9.05  |
| 221919_at    | HNRNPA1 /// LOC728844 | heterogeneous nuclear ribonucleoprotein A1 /// hypothetical LOC728844                                                            | 0.747876 | 7.53  | 8.03  | 5.05 | 5.52  | 4.65  | 5.7   | 6.4   | 7.01  | 4.83  | 7.68  |
| 211720_x_at  | RPLP0                 | ribosomal protein, large, P0                                                                                                     | 0.748355 | 6.79  | 7.85  | 4.68 | 6.94  | 8.11  | 9.72  | 9.33  | 8.51  | 7.04  | 8.37  |
| 1563560_at   | AHNAK                 | AHNAK nucleoprotein                                                                                                              | 0.748616 | 7.16  | 7.93  | 6.33 | 7.63  | 8.53  | 8.97  | 10.21 | 9.18  | 8.07  | 3.56  |
| 1570151_at   | ---                   | ---                                                                                                                              | 0.748668 | 7.32  | 7.1   | 7.3  | 7.36  | 6.91  | 4.66  | 5.48  | 4.52  | 7.62  | 7.03  |
| 1559881_s_at | ZNF12                 | zinc finger protein 12                                                                                                           | 0.748668 | 7.9   | 8.12  | 5.13 | 6.28  | 6.72  | 6.94  | 6.06  | 7.69  | 6.98  | 5.25  |
| 217388_s_at  | KYNU                  | kynureninase (L-kynurenine hydrolase)                                                                                            | 0.749017 | 3.48  | 5.54  | 4.34 | 3.39  | 5.83  | 6.59  | 7.63  | 8.04  | 4.54  | 4.15  |
| 1565000_a_at | TCP11L2               | T-complex 11 (mouse)-like 2                                                                                                      | 0.749017 | 8.8   | 8.1   | 9.82 | 8.13  | 7.57  | 6.31  | 7.54  | 7.73  | 7.28  | 10.18 |
| 238343_x_at  | ---                   | ---                                                                                                                              | 0.749354 | 6.88  | 4.18  | 6.71 | 7.19  | 4.4   | 5.84  | 5.22  | 5.08  | 6.27  | 4.51  |
| 236937_at    | VPS8                  | Vacuolar protein sorting 8 homolog (S. cerevisiae)                                                                               | 0.75063  | 5.82  | 4.9   | 6.43 | 6.78  | 4.72  | 6.96  | 5.64  | 3.82  | 4.24  | 7.44  |
| 1568012_at   | CLIP1                 | CAP-GLY domain containing linker protein 1                                                                                       | 0.75063  | 7.01  | 7.11  | 4.65 | 6.58  | 6.68  | 4.78  | 6.33  | 5.47  | 5.54  | 2.32  |
| 241073_at    | ---                   | ---                                                                                                                              | 0.750799 | 6.26  | 5.72  | 6.42 | 5.19  | 4.62  | 4.67  | 5.13  | 7.47  | 6.92  | 4.38  |
| 1556204_a_at | ZNF814                | Zinc finger protein 814                                                                                                          | 0.751267 | 7.46  | 6.89  | 3.9  | 7.36  | 6.48  | 4.73  | 7.09  | 6.31  | 7.34  | 3.69  |
| 220960_x_at  | RPL22                 | ribosomal protein L22                                                                                                            | 0.751267 | 10.09 | 11.29 | 9.13 | 10.35 | 11.59 | 12.5  | 12.18 | 12.02 | 11.71 | 11.53 |
| 1555241_at   | C8orf59               | chromosome 8 open reading frame 59                                                                                               | 0.751467 | 4.41  | 3.81  | 4.42 | 6.09  | 4.24  | 5.37  | 6.5   | 6.54  | 6.03  | 6.76  |
| 1554311_a_at | SUPT6H                | suppressor of Ty 6 homolog (S. cerevisiae)                                                                                       | 0.752202 | 8.72  | 9.08  | 6.72 | 8.44  | 8.54  | 6.3   | 8.44  | 8.53  | 8.88  | 9.77  |
| 209258_s_at  | SMC3                  | structural maintenance of chromosomes 3                                                                                          | 0.752305 | 10.8  | 10.97 | 7.19 | 9.63  | 10.96 | 10.11 | 10.81 | 10.36 | 10.42 | 9     |
| 238439_at    | ANKRD22               | ankyrin repeat domain 22                                                                                                         | 0.752462 | 4.89  | 5.42  | 8.17 | 8.06  | 6.53  | 5.06  | 7.05  | 7.37  | 4.99  | 6.81  |
| 236899_at    | LOC729397             | hypothetical LOC729397                                                                                                           | 0.752476 | 3.92  | 4.03  | 6.82 | 5.12  | 4.42  | 5.1   | 7.38  | 4.01  | 5.23  | 6.83  |

|              |                       |                                                                                  |          |      |       |      |       |       |       |       |       |       |       |
|--------------|-----------------------|----------------------------------------------------------------------------------|----------|------|-------|------|-------|-------|-------|-------|-------|-------|-------|
| 239761_at    | GCNT1                 | glucosaminyl (N-acetyl) transferase 1, core 2 (beta-1,6-N-acetylglucosaminyltran | 0.752645 | 5.94 | 7.03  | 6.7  | 5.19  | 8.26  | 5.81  | 7.01  | 8.03  | 6.87  | 8.73  |
| 217760_at    | TRIM44                | tripartite motif-containing 44                                                   | 0.752951 | 4.33 | 5.32  | 4.1  | 4.35  | 4.5   | 7.01  | 6.17  | 7.2   | 4.48  | 5.28  |
| 214749_s_at  | ARMCX6 /// LOC653354  | LOC653354                                                                        | 0.753176 | 5.98 | 6.75  | 3.38 | 7.24  | 8.59  | 10.3  | 7.74  | 8.96  | 7.85  | 3.34  |
| 241940_at    | ---                   | armadillo repeat containing, X-linked 6 /// hypothetical                         | 0.753925 | 7.44 | 7.67  | 5.44 | 7.71  | 6.99  | 6.78  | 7.41  | 6.63  | 7.59  | 4.03  |
| 222040_at    | HNRNPA1 /// LOC728844 | LOC728844                                                                        | 0.754572 | 8.83 | 9.24  | 7.08 | 6.07  | 7.58  | 7.17  | 5.52  | 6.26  | 6.52  | 7.59  |
| 233375_at    | EFCAB2                | EF-hand calcium binding domain 2                                                 | 0.754572 | 5.86 | 4.52  | 7.91 | 6.56  | 5.22  | 6.87  | 4.01  | 5.37  | 6.44  | 3.57  |
| 1560854_s_at | ZNF107                | zinc finger protein 107                                                          | 0.754572 | 8.85 | 8.53  | 5.59 | 7.35  | 7.14  | 6.17  | 6.39  | 6.24  | 8.12  | 6.75  |
| 216328_at    | SIGLEC8               | sialic acid binding Ig-like lectin 8                                             | 0.754572 | 5.58 | 8.64  | 6.3  | 4.82  | 7.3   | 7.49  | 5.66  | 5.77  | 5.94  | 5.81  |
| 239052_at    | HNRNPD                | Heterogeneous nuclear ribonucleoprotein D (AU-rich element RNA binding protein 1 | 0.754572 | 7.28 | 6.61  | 6.15 | 6.61  | 5.61  | 3.04  | 5.82  | 6.27  | 5.45  | 5.5   |
| 208913_at    | GGA2                  | golgi associated, gamma adaptin ear containing, ARF binding protein 2            | 0.754691 | 6.35 | 8.56  | 5.86 | 7.17  | 8.43  | 8.72  | 8.11  | 8.96  | 8.1   | 8.25  |
| 242974_at    | CD47                  | CD47 molecule                                                                    | 0.75496  | 5.21 | 4.91  | 5.18 | 4.04  | 5.66  | 7.03  | 4.76  | 4.38  | 6.42  | 7.53  |
| 217457_s_at  | RAP1GDS1              | RAP1, GTP-GDP dissociation stimulator 1                                          | 0.755069 | 4.06 | 7.53  | 4.42 | 4.88  | 6.25  | 7.5   | 6.65  | 6.67  | 6     | 5.99  |
| 225622_at    | PAG1                  | phosphoprotein associated with glycosphingolipid microdomains 1                  | 0.755207 | 8.29 | 8.06  | 7.87 | 8.6   | 7.06  | 4.13  | 8.44  | 8.28  | 7.38  | 6.68  |
| 238677_at    | WDR36                 | WD repeat domain 36                                                              | 0.755366 | 5.16 | 4.42  | 3.53 | 5     | 6.22  | 5.82  | 6.09  | 5.93  | 6.27  | 7.74  |
| 242713_at    | ---                   | ---                                                                              | 0.755409 | 6.82 | 6.32  | 7.37 | 8.51  | 5.72  | 4.32  | 5.9   | 5.15  | 6.19  | 7.71  |
| 239188_at    | PPP2R3C               | protein phosphatase 2 (formerly 2A), regulatory subunit B'', gamma               | 0.755527 | 6.13 | 4.95  | 5.07 | 7.37  | 4.68  | 4.45  | 6.14  | 7.24  | 6.38  | 5.79  |
| 205000_at    | DDX3Y                 | DEAD (Asp-Glu-Ala-Asp) box polypeptide 3, Y-linked                               | 0.755567 | 3.98 | 3.94  | 3.76 | 3.57  | 8.2   | 6.68  | 8.42  | 6.71  | 8.92  | 6.69  |
| 208856_x_at  | RPLP0                 | ribosomal protein, large, P0                                                     | 0.755781 | 6.77 | 7.89  | 5.07 | 6.76  | 8.19  | 9.78  | 9.27  | 8.71  | 7.02  | 8.31  |
| 208697_s_at  | EIF3E                 | eukaryotic translation initiation factor 3, subunit E                            | 0.757124 | 7.55 | 8.81  | 7.6  | 8.23  | 9.23  | 10.57 | 10.18 | 9.87  | 8.93  | 9.22  |
| 201348_at    | GPX3                  | glutathione peroxidase 3 (plasma)                                                | 0.757478 | 10.2 | 9.03  | 8.01 | 10.36 | 9.37  | 8.99  | 8.13  | 6.53  | 9.19  | 8.21  |
| 203080_s_at  | BAZ2B                 | bromodomain adjacent to zinc finger domain, 2B                                   | 0.757658 | 8.94 | 7.65  | 7.15 | 8.99  | 8.18  | 7.25  | 7.84  | 4.88  | 8.77  | 8.66  |
| 211698_at    | EID1                  | EP300 interacting inhibitor of differentiation 1                                 | 0.757716 | 5.63 | 6.54  | 3.95 | 4.94  | 7.47  | 7.21  | 7.84  | 7.36  | 5.7   | 8.41  |
| 215046_at    | C2orf67               | chromosome 2 open reading frame 67                                               | 0.75785  | 6.79 | 8.07  | 4    | 6.92  | 7.57  | 4.75  | 6.56  | 6.01  | 5.78  | 4.33  |
| 241774_at    | ---                   | ---                                                                              | 0.75785  | 8.42 | 8.58  | 5.79 | 8.07  | 8.18  | 4.9   | 7.75  | 7.74  | 8.15  | 8.05  |
| 218306_s_at  | HERC1                 | hect (homologous to the E6-AP (UBE3A) carboxyl terminus) domain and RCC1 (CHC1)- | 0.75785  | 7.38 | 7.96  | 5.36 | 6.7   | 7.07  | 7.09  | 6.37  | 6.64  | 7.78  | 4.47  |
| 203629_s_at  | COG5                  | component of oligomeric golgi complex 5                                          | 0.75785  | 6.12 | 6.07  | 2.88 | 5.67  | 4.72  | 5.27  | 6.44  | 4.82  | 5.42  | 5.85  |
| 1563075_s_at | ---                   | ---                                                                              | 0.757906 | 6.51 | 6.19  | 3.54 | 7.12  | 6.85  | 4.26  | 4.82  | 4.38  | 6.34  | 4.91  |
| 220696_at    | ---                   | ---                                                                              | 0.757906 | 6.4  | 6.2   | 6.54 | 6.57  | 6.17  | 6.29  | 6.51  | 6.44  | 6.49  | 9.97  |
| 218754_at    | NOL9                  | nucleolar protein 9                                                              | 0.758243 | 6.63 | 7.58  | 3.94 | 4.57  | 6.51  | 6.52  | 6.32  | 6.4   | 5.79  | 4.7   |
| 242161_at    | ---                   | ---                                                                              | 0.75851  | 6.67 | 6.87  | 4.36 | 6.27  | 5.88  | 4.92  | 5.23  | 3.45  | 4.86  | 6.98  |
| 221775_x_at  | RPL22                 | ribosomal protein L22                                                            | 0.758709 | 9.99 | 11.28 | 9.33 | 10.44 | 11.53 | 12.66 | 12.41 | 12.17 | 11.81 | 11.46 |
| 1556285_s_at | PPA2                  | pyrophosphatase (inorganic) 2                                                    | 0.75898  | 5.6  | 5.24  | 7.82 | 5.79  | 5.9   | 7.85  | 5.41  | 7.43  | 5.61  | 6.04  |
| 233700_at    | ---                   | ---                                                                              | 0.75904  | 7.26 | 7.24  | 6.21 | 5.99  | 5.8   | 5.43  | 7.34  | 7.01  | 7.55  | 4.02  |
| 202581_at    | HSPA1A /// HSPA1B     | heat shock 70kDa protein 1A /// heat shock 70kDa protein 1B                      | 0.759705 | 9.16 | 9.83  | 8.13 | 8.82  | 11.67 | 11.07 | 10.08 | 10.32 | 9.26  | 7.42  |
| 210112_at    | HPS1                  | Hermansky-Pudlak syndrome 1                                                      | 0.759705 | 5.73 | 5.11  | 6.12 | 6.24  | 6.5   | 4.64  | 6.95  | 4.39  | 6.26  | 8.41  |

|             |          |                                                            |          |      |       |       |       |       |       |       |       |       |       |
|-------------|----------|------------------------------------------------------------|----------|------|-------|-------|-------|-------|-------|-------|-------|-------|-------|
| 243514_at   | ---      | ---                                                        | 0.759725 | 7.59 | 7.77  | 5.23  | 7.75  | 6.97  | 4.62  | 7.6   | 5.11  | 7.2   | 5.35  |
| 233655_s_at | HAUS6    | HAUS augmin-like complex, subunit 6                        | 0.759725 | 7.41 | 7.33  | 5.13  | 4.88  | 7.54  | 6.51  | 7.36  | 6.36  | 5.63  | 7.13  |
| 229221_at   | CD44     | CD44 molecule (Indian blood group)                         | 0.76021  | 6.9  | 4.39  | 6.17  | 7.5   | 6.29  | 4.2   | 7.2   | 6.42  | 5.4   | 3.79  |
| 206978_at   | CCR2     | chemokine (C-C motif) receptor 2                           | 0.76021  | 4.51 | 5.64  | 3.82  | 3.79  | 5.85  | 8.65  | 7.58  | 9.06  | 5.62  | 4     |
| 207075_at   | NLRP3    | NLR family, pyrin domain containing 3                      | 0.76021  | 5.57 | 5.67  | 6.45  | 7.27  | 6.87  | 6.98  | 7.19  | 8.18  | 8.33  | 9.11  |
| 242590_at   | ---      | ---                                                        | 0.76021  | 6.7  | 7.93  | 3.5   | 4.56  | 6.08  | 6.63  | 5.59  | 6.86  | 4.03  | 7.71  |
| 220369_at   | SMEK1    | SMEK homolog 1, suppressor of mek1 (Dictyostelium)         | 0.76021  | 6.83 | 7.22  | 4.6   | 7.07  | 7.27  | 6.45  | 6.37  | 4.64  | 6.4   | 5.45  |
| 225238_at   | MSI2     | musashi homolog 2 (Drosophila)                             | 0.76021  | 6.06 | 7.33  | 4.52  | 6.26  | 6.77  | 4.66  | 7.19  | 6.37  | 7.49  | 7.28  |
| 1566113_at  | ---      | ---                                                        | 0.761113 | 6.84 | 6.19  | 4.5   | 4.91  | 4.46  | 6.37  | 6.13  | 4.44  | 7.51  | 5.04  |
| 212999_x_at | HLA-DQB1 | major histocompatibility complex, class II, DQ beta 1      | 0.761363 | 7.25 | 8.61  | 7.92  | 7.78  | 4.9   | 5.29  | 7.86  | 8.26  | 4.61  | 3.69  |
| 33646_g_at  | GM2A     | GM2 ganglioside activator                                  | 0.761404 | 5.71 | 5.83  | 10.21 | 9.47  | 5.69  | 6.92  | 8.51  | 9.49  | 5.42  | 5.65  |
| 228592_at   | MS4A1    | membrane-spanning 4-domains, subfamily A, member 1         | 0.761924 | 2.8  | 7.05  | 2.87  | 2.21  | 5.93  | 6.27  | 5.71  | 6.36  | 3.39  | 4.29  |
| 230389_at   | FBNP1    | formin binding protein 1                                   | 0.762397 | 5.83 | 5.74  | 4.8   | 6.62  | 5.31  | 6.78  | 5.89  | 3.83  | 6.57  | 8.03  |
| 218140_x_at | SRPRB    | signal recognition particle receptor, B subunit            | 0.762732 | 4.86 | 4.87  | 3.97  | 5.66  | 6.39  | 7.64  | 7.25  | 6.39  | 6.11  | 5.14  |
| 230779_at   | TNRC6B   | trinucleotide repeat containing 6B                         | 0.762732 | 7.21 | 7.14  | 5.72  | 8.03  | 6.74  | 6.55  | 6.25  | 5.09  | 7.83  | 5.18  |
| 226264_at   | SUSD1    | sushi domain containing 1                                  | 0.762732 | 5.05 | 6.6   | 4.75  | 5.89  | 7.63  | 7.7   | 5.7   | 6.74  | 4.77  | 4.56  |
| 1552334_at  | TRIOBP   | TRIO and F-actin binding protein                           | 0.762796 | 6.1  | 6.47  | 4.18  | 4.65  | 6.47  | 7.28  | 6.16  | 4.63  | 5.26  | 7.11  |
| 214322_at   | CAMK2G   | calcium/calmodulin-dependent protein kinase II gamma       | 0.762796 | 6.39 | 4.95  | 3.93  | 3.96  | 5.45  | 3.81  | 5.51  | 6.29  | 6.36  | 5.06  |
| 213638_at   | PHACTR1  | phosphatase and actin regulator 1                          | 0.762879 | 8.35 | 6.89  | 10.8  | 10.79 | 8.6   | 5.85  | 8.13  | 8.06  | 9.28  | 7.74  |
| 209620_s_at | ABCB7    | ATP-binding cassette, sub-family B (MDR/TAP), member 7     | 0.762879 | 5.35 | 5.43  | 3.66  | 4.51  | 6.69  | 6.45  | 4.5   | 6.39  | 5.89  | 8.15  |
| 201029_s_at | CD99     | CD99 molecule                                              | 0.762966 | 6.66 | 4.67  | 6.1   | 6.79  | 7.22  | 9.66  | 8.8   | 9.23  | 6.88  | 8.26  |
| 205898_at   | CX3CR1   | chemokine (C-X3-C motif) receptor 1                        | 0.763128 | 6.1  | 6.63  | 4.55  | 7.39  | 7.53  | 9.09  | 8.47  | 7.77  | 7.32  | 7.01  |
| 1570566_at  | ---      | ---                                                        | 0.763153 | 5.92 | 5.6   | 2.98  | 6.98  | 7.2   | 4.51  | 5.63  | 6.07  | 5.77  | 2.79  |
| 219293_s_at | OLA1     | Obg-like ATPase 1                                          | 0.76324  | 5.65 | 4.96  | 4.35  | 5.71  | 5.31  | 7.33  | 7.17  | 6.46  | 4.02  | 6.81  |
| 212216_at   | PREPL    | prolyl endopeptidase-like                                  | 0.76324  | 4.89 | 5.93  | 3.3   | 4.8   | 6.14  | 4.92  | 6.02  | 7.07  | 5.25  | 5.38  |
| 201957_at   | PPP1R12B | protein phosphatase 1, regulatory (inhibitor) subunit 12B  | 0.76328  | 8.08 | 7.86  | 6.25  | 7.54  | 7.5   | 3.9   | 5.93  | 6.46  | 7.29  | 4.77  |
| 240288_at   | KCNRG    | potassium channel regulator                                | 0.76328  | 7.85 | 8.44  | 5.06  | 8.01  | 6.75  | 6.03  | 7.96  | 7.26  | 7.98  | 7.24  |
| 201908_at   | DVL3     | dishevelled, dsh homolog 3 (Drosophila)                    | 0.763486 | 6.64 | 7.42  | 6.44  | 5.92  | 7.29  | 4.04  | 5.3   | 6.4   | 7.02  | 4.07  |
| 222047_s_at | SRRT     | serrate RNA effector molecule homolog (Arabidopsis)        | 0.763648 | 7.35 | 7.33  | 6.1   | 6.25  | 5.83  | 4.49  | 7.3   | 7.2   | 7.12  | 5.26  |
| 200982_s_at | ANXA6    | annexin A6                                                 | 0.763664 | 5.91 | 6.24  | 4.2   | 5.21  | 7.1   | 6.76  | 6.39  | 7.59  | 5.19  | 5.54  |
| 1552423_at  | ETV3     | ets variant 3                                              | 0.763772 | 6.89 | 5.64  | 7.76  | 5.01  | 5.12  | 4.65  | 4.89  | 5.37  | 6.59  | 4.68  |
| 216605_s_at | CEACAM21 | carcinoembryonic antigen-related cell adhesion molecule 21 | 0.763986 | 3.6  | 4.64  | 6.85  | 6.5   | 6.13  | 6.92  | 4.39  | 3.71  | 5.95  | 7.94  |
| 1562028_at  | CCND3    | Cyclin D3                                                  | 0.763986 | 6.29 | 5.42  | 4.83  | 5.24  | 3.54  | 4.06  | 3.9   | 4.25  | 7.11  | 7.87  |
| 206059_at   | ZNF91    | zinc finger protein 91                                     | 0.764022 | 6.58 | 6.58  | 3.62  | 5.56  | 5.88  | 7.36  | 7.03  | 6.07  | 4.24  | 2.25  |
| 208768_x_at | RPL22    | ribosomal protein L22                                      | 0.76434  | 9.98 | 11.18 | 9.19  | 10.32 | 11.43 | 12.58 | 12.35 | 12.06 | 11.76 | 11.47 |
| 208691_at   | TFRC     | transferrin receptor (p90, CD71)                           | 0.764344 | 5.23 | 4.5   | 7.98  | 7.27  | 7.14  | 5.84  | 5.7   | 6.84  | 7.51  | 4.4   |
| 223168_at   | RHOU     | ras homolog gene family, member U                          | 0.764631 | 5.12 | 6.26  | 3.13  | 4.27  | 5.6   | 6.58  | 6.05  | 6.92  | 4.31  | 6.68  |
| 213064_at   | ZC3H14   | zinc finger CCCH-type containing 14                        | 0.764631 | 6.31 | 4.98  | 2.89  | 6.39  | 7.55  | 6.98  | 6.71  | 6.6   | 6.56  | 4.14  |
| 219551_at   | EAF2     | ELL associated factor 2                                    | 0.764631 | 6.43 | 5.32  | 7.89  | 7.03  | 7.39  | 5.18  | 6.24  | 7.13  | 5.81  | 8.32  |

|              |                        |                                                                                                                                               |          |       |       |       |       |       |       |       |       |       |      |
|--------------|------------------------|-----------------------------------------------------------------------------------------------------------------------------------------------|----------|-------|-------|-------|-------|-------|-------|-------|-------|-------|------|
| 231968_at    | UGCGL1                 | UDP-glucose ceramide glucosyltransferase-like 1                                                                                               | 0.764944 | 7.61  | 7.47  | 4.31  | 7.01  | 8.32  | 5.21  | 6.6   | 6.54  | 7.3   | 5.48 |
| 222407_s_at  | ZFP106                 | zinc finger protein 106 homolog (mouse)                                                                                                       | 0.764953 | 10.44 | 11.19 | 7.68  | 9.52  | 9.91  | 8.35  | 10.04 | 9.69  | 9.94  | 9.1  |
| 205218_at    | POLR3F                 | polymerase (RNA) III (DNA directed) polypeptide F, 39 kDa ribosomal protein, large, PO /// ribosomal protein, large, PO                       | 0.76514  | 5.91  | 5.59  | 3.8   | 5.9   | 6.44  | 7.4   | 6.16  | 8.16  | 6.74  | 5.94 |
| 214167_s_at  | RPLP0 /// RPLPOP6      | pseudogene 6                                                                                                                                  | 0.765619 | 5.35  | 6.56  | 4.63  | 5.56  | 7.09  | 8.7   | 8     | 7.73  | 5.86  | 6.82 |
| 240656_at    | ---                    | ---                                                                                                                                           | 0.765982 | 6.68  | 3.62  | 5.27  | 6.37  | 4.48  | 4.72  | 5.07  | 9.38  | 5.84  | 7.02 |
| 224629_at    | LMAN1                  | lectin, mannose-binding, 1                                                                                                                    | 0.766278 | 5.99  | 3.8   | 3.74  | 4.07  | 5.74  | 5.71  | 7     | 6.51  | 6.55  | 5.35 |
| 205483_s_at  | ISG15                  | ISG15 ubiquitin-like modifier                                                                                                                 | 0.766475 | 7.94  | 7.81  | 9.48  | 9.13  | 9.26  | 9.73  | 7.21  | 7.75  | 9     | 10.3 |
| 1570507_at   | SFRS2IP                | Splicing factor, arginine/serine-rich 2, interacting protein v-abl Abelson murine leukemia viral oncogene homolog 2 (arg, Abelson-related gen | 0.766475 | 6.23  | 5.87  | 3.53  | 6.16  | 4.9   | 4.91  | 5.15  | 4.92  | 6.48  | 7.2  |
| 231907_at    | ABL2                   | translocase of inner mitochondrial membrane 23 homolog (yeast)                                                                                | 0.766489 | 6.29  | 7.31  | 3.87  | 6.16  | 6.74  | 4.48  | 6.69  | 4.93  | 5.45  | 3.97 |
| 224038_at    | TIMM23                 | ATPase, Na+/K+ transporting, beta 3 polypeptide                                                                                               | 0.766523 | 6.27  | 7.48  | 6.62  | 6.83  | 6.73  | 7.8   | 4.32  | 6.56  | 4.66  | 7.46 |
| 208836_at    | ATP1B3                 | chromosome 14 open reading frame 139                                                                                                          | 0.768242 | 5.49  | 6.18  | 3.98  | 6.34  | 7.62  | 7.74  | 8     | 8.63  | 6.13  | 5.33 |
| 219563_at    | C14orf139              | teashirt zinc finger homeobox 3                                                                                                               | 0.768372 | 7.83  | 8.1   | 4.14  | 7.37  | 7.82  | 6.5   | 7.75  | 7.57  | 7.9   | 7.41 |
| 223392_s_at  | TSHZ3                  | similar to hCG15011                                                                                                                           | 0.76869  | 9.75  | 9.36  | 7.36  | 7.93  | 8.87  | 6.72  | 8.21  | 8     | 8.08  | 5.92 |
| 213747_at    | LOC100134128           | zinc finger and BTB domain containing 43                                                                                                      | 0.768934 | 7.93  | 7.82  | 10.31 | 9.67  | 7.73  | 8.82  | 7.07  | 6.95  | 7.89  | 9.3  |
| 204180_s_at  | ZBTB43                 | zinc finger protein 451                                                                                                                       | 0.768934 | 7.52  | 7.68  | 4.27  | 7.29  | 6.71  | 6.21  | 7.8   | 6.75  | 6.8   | 7.11 |
| 1556060_a_at | ZNF451                 | ---                                                                                                                                           | 0.769098 | 6.5   | 8.08  | 4.54  | 5.85  | 5.41  | 6.37  | 6.66  | 3.77  | 7.21  | 8.23 |
| 235493_at    | ---                    | regulation of nuclear pre-mRNA domain containing 1A                                                                                           | 0.769103 | 6.89  | 6.32  | 4.27  | 6.59  | 5.9   | 6.3   | 4.89  | 4.06  | 6.47  | 4.64 |
| 225953_at    | RPRD1A                 | ---                                                                                                                                           | 0.76913  | 3.63  | 4.47  | 4.33  | 4.84  | 5.7   | 6.57  | 6.16  | 6.51  | 4.63  | 6    |
| 231343_at    | ---                    | ---                                                                                                                                           | 0.769347 | 6.75  | 7.02  | 7.09  | 8.09  | 8.03  | 4.98  | 7.74  | 7.54  | 8.79  | 4.42 |
| 1557582_at   | BIN3                   | bridging integrator 3                                                                                                                         | 0.769394 | 7.79  | 6.72  | 8.97  | 6.98  | 3.93  | 3.63  | 5.41  | 5.12  | 5.08  | 4.64 |
| 225551_at    | C1orf71                | chromosome 1 open reading frame 71                                                                                                            | 0.769395 | 5.52  | 5.64  | 6.68  | 6.73  | 6.32  | 9.38  | 6.64  | 6.3   | 6.44  | 6.93 |
|              | LOC100134401 ///       | hypothetical protein LOC100134401 ///                                                                                                         |          |       |       |       |       |       |       |       |       |       |      |
|              | LOC100272216           | LOC100272216                                                                                                                                  | 0.770122 | 8.54  | 7.95  | 7.81  | 9.15  | 7.81  | 5.51  | 8.23  | 8.87  | 8.77  | 6.64 |
| 213605_s_at  | LOC100272216           | LOC100272216                                                                                                                                  | 0.770122 | 8.54  | 7.95  | 7.81  | 9.15  | 7.81  | 5.51  | 8.23  | 8.87  | 8.77  | 6.64 |
| 1554744_at   | CARD16                 | caspase recruitment domain family, member 16                                                                                                  | 0.770185 | 4.55  | 5.79  | 5.7   | 7.36  | 6.97  | 6.24  | 8.52  | 8.06  | 6.77  | 8.53 |
| 223400_s_at  | PBRM1                  | polybromo 1                                                                                                                                   | 0.770553 | 5.43  | 6.96  | 4.18  | 4.94  | 5.32  | 5.72  | 6.14  | 6.52  | 5.36  | 2.26 |
| 201694_s_at  | EGR1                   | early growth response 1                                                                                                                       | 0.770631 | 8.62  | 8.23  | 9.16  | 9.38  | 10.25 | 8.71  | 11.19 | 10.91 | 12.08 | 6.39 |
| 230588_s_at  | LOC285074              | anaphase promoting complex subunit 1 pseudogene                                                                                               | 0.770821 | 8.18  | 8.48  | 8.35  | 8.01  | 6.75  | 5.47  | 7.84  | 5.47  | 7.51  | 6.76 |
| 1567559_s_at | TREML4                 | triggering receptor expressed on myeloid cells-like 4                                                                                         | 0.771342 | 6.8   | 5.29  | 5.41  | 7.17  | 3.96  | 3.77  | 6.58  | 6.86  | 6.37  | 3.4  |
| 223773_s_at  | SNHG12                 | small nucleolar RNA host gene 12 (non-protein coding)                                                                                         | 0.771342 | 5.96  | 6.28  | 4.68  | 4.21  | 4.91  | 5.86  | 5.84  | 4.28  | 6.1   | 7.78 |
| 222697_s_at  | ABHD10                 | abhydrolase domain containing 10                                                                                                              | 0.771517 | 4.75  | 5.74  | 3.91  | 4.76  | 7.85  | 8.72  | 5.37  | 6.71  | 4.44  | 5.9  |
| 227404_s_at  | EGR1                   | Early growth response 1                                                                                                                       | 0.771961 | 9.17  | 8.46  | 10.12 | 10.14 | 10.69 | 9.64  | 11.82 | 11.46 | 12.66 | 6.55 |
| 244765_at    | ---                    | ---                                                                                                                                           | 0.771961 | 6.69  | 6.52  | 3.93  | 6.96  | 6.8   | 7.04  | 7.8   | 6.56  | 5.88  | 6.64 |
| 222566_at    | SUV420H1               | suppressor of variegation 4-20 homolog 1 (Drosophila)                                                                                         | 0.772404 | 5.17  | 6.79  | 4.67  | 5.62  | 7.08  | 6.09  | 5.49  | 8.33  | 5.82  | 7.41 |
| 229980_s_at  | SNX5                   | sorting nexin 5                                                                                                                               | 0.772973 | 6.89  | 6.93  | 2.91  | 5.9   | 8.35  | 9.3   | 7.94  | 8.83  | 7.11  | 8.17 |
|              |                        | BMS1-like, ribosome assembly protein (yeast) pseudogene ///                                                                                   |          |       |       |       |       |       |       |       |       |       |      |
| 1569013_s_at | LOC727914 /// LOC96610 | BMS1 homolog, riboso                                                                                                                          | 0.773197 | 7.75  | 7.78  | 6.36  | 8.29  | 7.99  | 6.49  | 7.38  | 7.3   | 5.07  | 3.79 |
| 244358_at    | ---                    | ---                                                                                                                                           | 0.773364 | 7.16  | 3.2   | 4.5   | 7.06  | 4.83  | 3.21  | 5.6   | 5.28  | 7.85  | 7.92 |
| 203962_s_at  | NEBL                   | nebulette                                                                                                                                     | 0.773447 | 7.39  | 7.51  | 3.77  | 4.13  | 3.59  | 3.6   | 7.23  | 7.21  | 4.01  | 4.08 |
| 1555759_a_at | CCL5                   | chemokine (C-C motif) ligand 5                                                                                                                | 0.773447 | 8.33  | 6.15  | 8.38  | 9.87  | 9.51  | 12.84 | 11.3  | 11.68 | 8.34  | 9.49 |



|              |           |                                                                                  |          |      |      |       |       |      |      |      |      |      |      |
|--------------|-----------|----------------------------------------------------------------------------------|----------|------|------|-------|-------|------|------|------|------|------|------|
| 243032_at    | ---       | ---                                                                              | 0.774406 | 7.4  | 5.95 | 3.47  | 6.24  | 5.81 | 2.81 | 6.5  | 3.75 | 7.77 | 7.09 |
| 1554595_at   | SYMPK     | symplekin                                                                        | 0.774475 | 8.05 | 6.37 | 5.09  | 4.98  | 4.94 | 4.4  | 6.08 | 5.2  | 6.65 | 4.61 |
| 209711_at    | SLC35D1   | solute carrier family 35 (UDP-glucuronic acid/UDP-N-acetylgalactosamine dual tra | 0.774545 | 4.41 | 4.9  | 3.71  | 6     | 6.32 | 6.23 | 6.75 | 4.43 | 4.9  | 3.7  |
| 214351_x_at  | RPL13     | ribosomal protein L13                                                            | 0.774576 | 6.75 | 7.55 | 5.63  | 6.73  | 7.88 | 9.01 | 8.66 | 8.34 | 7.11 | 7.87 |
| 233893_s_at  | KIAA1530  | KIAA1530                                                                         | 0.7747   | 6.98 | 5.04 | 6.43  | 7.09  | 5.95 | 5.47 | 5.08 | 3.82 | 7.26 | 5.84 |
| 208095_s_at  | SRP72     | signal recognition particle 72kDa                                                | 0.775832 | 8.22 | 8.41 | 6.28  | 7.85  | 9    | 8.16 | 8.39 | 9.03 | 7.98 | 5.87 |
| 209480_at    | HLA-DQB1  | major histocompatibility complex, class II, DQ beta 1                            | 0.77646  | 8.04 | 8.93 | 8.07  | 8.19  | 2.83 | 2.81 | 7.64 | 7.75 | 2.61 | 3.56 |
| 231715_s_at  | PYCR2     | pyrroline-5-carboxylate reductase family, member 2                               | 0.77646  | 4.82 | 4.75 | 6.31  | 5.29  | 6.66 | 6.46 | 5.49 | 8.12 | 5.67 | 8.55 |
| 242239_at    | ---       | ---                                                                              | 0.776771 | 6.88 | 5.46 | 7.59  | 4.32  | 5.84 | 8.3  | 5.65 | 8.55 | 7.43 | 7.29 |
| 223042_s_at  | FUNDC2    | FUN14 domain containing 2                                                        | 0.77713  | 5.75 | 7.24 | 4.44  | 5.95  | 7.74 | 7.37 | 7.88 | 7.32 | 6.26 | 6.35 |
| 1552536_at   | VTI1A     | vesicle transport through interaction with t-SNAREs homolog 1A (yeast)           | 0.77713  | 6.11 | 3.87 | 4.59  | 4.93  | 4.04 | 5.33 | 4.59 | 4.2  | 7    | 6.51 |
| 204182_s_at  | ZBTB43    | zinc finger and BTB domain containing 43                                         | 0.77751  | 6.62 | 6.46 | 5.6   | 5.71  | 6.6  | 4.37 | 6.96 | 2.97 | 7.79 | 5.96 |
| 218224_at    | PNMA1     | paraneoplastic antigen MA1                                                       | 0.77751  | 5.51 | 5.17 | 3.6   | 5.51  | 5.88 | 7.57 | 6.99 | 7.21 | 6.18 | 6.79 |
| 229041_s_at  | ---       | ---                                                                              | 0.77751  | 8.47 | 7.23 | 9.21  | 9.5   | 8.42 | 6.15 | 7.36 | 7.61 | 8.27 | 10.1 |
| 227631_at    | ---       | ---                                                                              | 0.777546 | 4.91 | 5.26 | 5.34  | 5.21  | 6.54 | 7.58 | 7.19 | 5.82 | 4.82 | 6.89 |
| 238935_at    | RPS27L    | ribosomal protein S27-like                                                       | 0.777881 | 3.99 | 4.81 | 7.53  | 5.61  | 6.79 | 6.47 | 3.73 | 5.98 | 5.23 | 3.83 |
| 242865_at    | ---       | ---                                                                              | 0.777889 | 7.4  | 6.58 | 4.56  | 5.68  | 5.09 | 5.18 | 7.24 | 6.76 | 7.49 | 6.32 |
| 230225_x_at  | ---       | ---                                                                              | 0.777925 | 5.27 | 3.05 | 2.81  | 4.32  | 3.74 | 6.53 | 4.87 | 3.55 | 6.5  | 6.62 |
| 1563426_a_at | LOC644613 | hypothetical protein LOC644613                                                   | 0.778017 | 4.4  | 6.85 | 6.32  | 4.6   | 4.07 | 5.4  | 5.66 | 6.68 | 4.73 | 4.07 |
| 214097_at    | RPS21     | ribosomal protein S21                                                            | 0.779053 | 7.06 | 7.89 | 5.83  | 6.11  | 7.95 | 9.14 | 8.87 | 9.23 | 6.71 | 7.3  |
| 228618_at    | PEAR1     | platelet endothelial aggregation receptor 1                                      | 0.779849 | 4.46 | 4.82 | 4.78  | 4.91  | 6.1  | 9.31 | 6.94 | 7.28 | 6.18 | 4.96 |
| 1557051_s_at | ---       | ---                                                                              | 0.779849 | 7.4  | 6.52 | 5.97  | 6.04  | 4.28 | 4.8  | 3.24 | 4.17 | 4.27 | 4.4  |
| 224698_at    | FAM62B    | family with sequence similarity 62 (C2 domain containing) member B               | 0.780028 | 5.54 | 3.61 | 2.94  | 7.58  | 7.53 | 6.35 | 5.65 | 5.44 | 7.02 | 6.76 |
| 242827_x_at  | ---       | ---                                                                              | 0.780028 | 7.53 | 8.43 | 5.87  | 6.82  | 5.76 | 6.08 | 7.52 | 7.73 | 8.16 | 5.54 |
| 213016_at    | BBX       | bobby sox homolog (Drosophila)                                                   | 0.780105 | 6.76 | 7.22 | 4.6   | 7.33  | 7.66 | 8.18 | 6.44 | 6.25 | 7.4  | 4.44 |
| 235622_at    | ---       | ---                                                                              | 0.780741 | 6.19 | 6.11 | 7.69  | 7     | 5.9  | 7.43 | 6.58 | 4.23 | 6.53 | 7.7  |
| 1569990_at   | NUDT3     | nudix (nucleoside diphosphate linked moiety X)-type motif 3                      | 0.781225 | 6.67 | 6.72 | 3.72  | 5.65  | 4.27 | 4.37 | 3.77 | 4.37 | 6.55 | 4.53 |
| 209143_s_at  | CLNS1A    | chloride channel, nucleotide-sensitive, 1A                                       | 0.781535 | 4.75 | 6.57 | 4.18  | 5.41  | 6.63 | 7.24 | 7.66 | 7.74 | 5.73 | 6.89 |
| 231972_at    | ---       | ---                                                                              | 0.782098 | 9.63 | 7.87 | 11.83 | 11.68 | 8.32 | 6.93 | 9.96 | 9.09 | 9.56 | 9.07 |
| 219159_s_at  | SLAMF7    | SLAM family member 7                                                             | 0.782129 | 8.28 | 5.51 | 8.94  | 7.77  | 7.84 | 6.91 | 9.73 | 8.75 | 7.46 | 8.82 |
| 229520_s_at  | C14orf118 | chromosome 14 open reading frame 118                                             | 0.782268 | 7.61 | 7.12 | 7.14  | 7.63  | 7.15 | 4.49 | 7.71 | 7.82 | 7.98 | 8.18 |
| 223995_at    | SLC12A9   | solute carrier family 12 (potassium/chloride transporters), member 9             | 0.782303 | 6.39 | 6.26 | 7.46  | 6.46  | 4.04 | 6.07 | 6.12 | 5.21 | 5.73 | 7.89 |
| 223382_s_at  | ZNRF1     | zinc and ring finger 1                                                           | 0.782368 | 6.13 | 6.27 | 7.28  | 4.16  | 7.37 | 6.17 | 7.11 | 7.6  | 6.86 | 5.99 |
| 1557217_a_at | FANCB     | Fanconi anemia, complementation group B                                          | 0.783086 | 3.61 | 5.59 | 7.48  | 6.58  | 7.42 | 6.91 | 8.7  | 2.66 | 4.26 | 5.68 |
| 228238_at    | GAS5      | growth arrest-specific 5 (non-protein coding)                                    | 0.783086 | 6.66 | 6.59 | 3.92  | 5.28  | 5.37 | 6.38 | 7.26 | 6.41 | 6.17 | 7.42 |
| 211786_at    | TNFRSF9   | tumor necrosis factor receptor superfamily, member 9                             | 0.783105 | 5.69 | 6.15 | 5.69  | 6.24  | 4.16 | 5.11 | 4.79 | 3.49 | 6.8  | 5.16 |
| 205048_s_at  | PSPH      | phosphoserine phosphatase                                                        | 0.783477 | 4.32 | 5.09 | 4.23  | 3.88  | 6.07 | 6.82 | 6.03 | 6.88 | 6.51 | 7.8  |
| 236475_at    | MICAL2    | Microtubule associated monooxygenase, calponin and LIM domain containing 2       | 0.783819 | 8.38 | 7.8  | 7.07  | 7.57  | 6.5  | 5.66 | 7.78 | 6.33 | 8.73 | 8.32 |

|              |                  |                                                                                                                            |          |       |       |       |       |      |       |       |       |       |       |
|--------------|------------------|----------------------------------------------------------------------------------------------------------------------------|----------|-------|-------|-------|-------|------|-------|-------|-------|-------|-------|
| 244482_at    | ---              | ---                                                                                                                        | 0.783927 | 2.23  | 2.24  | 2.75  | 2.49  | 7.17 | 7.07  | 7.64  | 6.77  | 8.11  | 7.95  |
| 1556643_at   | LOC100128718     | Hypothetical protein LOC100128718                                                                                          | 0.783946 | 6.68  | 6.83  | 8.52  | 7.72  | 6.24 | 7.15  | 6.24  | 4.39  | 8.24  | 9.72  |
| 1554835_a_at | B3GNT5           | 5                                                                                                                          | 0.784011 | 8.34  | 6.7   | 8.97  | 9.34  | 7.24 | 7.21  | 7.41  | 7.07  | 7.33  | 5.93  |
| 1566995_at   | ---              | ---                                                                                                                        | 0.784647 | 6.27  | 4.08  | 3.94  | 6.14  | 3.88 | 4.45  | 4.98  | 4.09  | 6.97  | 3.28  |
| 226397_s_at  | ---              | ---                                                                                                                        | 0.784837 | 8.02  | 6.78  | 9.67  | 9.96  | 6.98 | 5.86  | 7.1   | 5.24  | 7.85  | 6.96  |
| 223169_s_at  | RHOU             | ras homolog gene family, member U                                                                                          | 0.784997 | 4.97  | 5.94  | 4.4   | 4.25  | 5.19 | 5.45  | 6.6   | 7.6   | 4.01  | 6.58  |
| 202286_s_at  | TACSTD2          | tumor-associated calcium signal transducer 2                                                                               | 0.785059 | 4.04  | 5.43  | 6.78  | 5.83  | 5.25 | 4.8   | 6.98  | 8.89  | 4.69  | 3.07  |
| 235678_at    | GM2A             | GM2 ganglioside activator                                                                                                  | 0.785446 | 5.1   | 5.21  | 7.63  | 7.43  | 5.46 | 5.95  | 6.94  | 6.16  | 4.68  | 4.81  |
| 228812_at    | ---              | ---                                                                                                                        | 0.785675 | 7.65  | 7.58  | 4.68  | 7.39  | 8.14 | 6.51  | 6.59  | 6.6   | 7.67  | 5.13  |
| 205353_s_at  | PEBP1            | phosphatidylethanolamine binding protein 1<br>polymerase (RNA) II (DNA directed) polypeptide J4,<br>pseudogene             | 0.785675 | 6.77  | 6.11  | 5.71  | 5.59  | 6.85 | 8.26  | 8.74  | 7.74  | 6.4   | 7.37  |
| 222208_s_at  | POLR2J4          | pseudogene                                                                                                                 | 0.785804 | 8.71  | 7.76  | 5.92  | 7.48  | 8.41 | 7.26  | 7.58  | 7.68  | 8.65  | 5.8   |
| 239917_at    | VPS8             | Vacuolar protein sorting 8 homolog (S. cerevisiae)                                                                         | 0.785941 | 6.39  | 5.33  | 5.9   | 6.29  | 4.47 | 5.33  | 4.29  | 3.85  | 4.34  | 7.33  |
| 239179_at    | ---              | ---                                                                                                                        | 0.786125 | 8.28  | 8.9   | 6.26  | 6.34  | 8.31 | 6.65  | 8.65  | 8.71  | 8.98  | 7.14  |
| 202869_at    | OAS1             | 2',5'-oligoadenylate synthetase 1, 40/46kDa                                                                                | 0.786313 | 4.77  | 5.59  | 7.04  | 7.1   | 6.72 | 7.15  | 5.56  | 4.58  | 4.22  | 4.89  |
| 223947_s_at  | MED23            | mediator complex subunit 23                                                                                                | 0.786313 | 8     | 8.42  | 4.24  | 6.44  | 8.18 | 5.41  | 7.31  | 6.74  | 7.96  | 8.18  |
| 204351_at    | S100P            | S100 calcium binding protein P                                                                                             | 0.786428 | 12.02 | 12.04 | 12.41 | 12.26 | 9.49 | 10.18 | 11.83 | 12.11 | 8.98  | 10.1  |
| 229398_at    | RAB18            | RAB18, member RAS oncogene family                                                                                          | 0.78646  | 7.14  | 7.73  | 6.12  | 6.12  | 7.5  | 7.02  | 7.71  | 6.23  | 8.41  | 9.41  |
| 228585_at    | ENTPD1           | ectonucleoside triphosphate diphosphohydrolase 1                                                                           | 0.78646  | 6.38  | 6.2   | 6.49  | 7.05  | 5.43 | 4.25  | 5.05  | 5.3   | 6.47  | 3.74  |
| 1561760_s_at | LOC645513        | Hypothetical LOC645513                                                                                                     | 0.786677 | 6.7   | 6.86  | 3.9   | 5.78  | 6.83 | 4.86  | 5.33  | 4.23  | 5.36  | 4.01  |
| 235306_at    | GIMAP8           | GTPase, IMAP family member 8                                                                                               | 0.786804 | 6.6   | 7.77  | 4.52  | 6.51  | 9.23 | 10.1  | 9.92  | 9.85  | 9.53  | 9.28  |
| 229383_at    | ---              | ---                                                                                                                        | 0.786851 | 4.59  | 7.42  | 5.82  | 4.69  | 6.42 | 7.45  | 6.65  | 7.89  | 6.51  | 4.24  |
| 230098_at    | PHF20L1          | PHD finger protein 20-like 1                                                                                               | 0.786851 | 6.84  | 7.36  | 5.21  | 8     | 7.22 | 5.7   | 8.17  | 6.06  | 6.74  | 5.39  |
| 225066_at    | ---              | ---                                                                                                                        | 0.787447 | 7.73  | 6.59  | 4.86  | 7     | 7.17 | 5.73  | 6.24  | 6.17  | 6.75  | 8.52  |
| 202638_s_at  | ICAM1            | intercellular adhesion molecule 1                                                                                          | 0.787456 | 8.49  | 7.3   | 8.65  | 9.8   | 7.51 | 6     | 6.64  | 6.35  | 7.23  | 5.95  |
| 217523_at    | CD44             | CD44 molecule (Indian blood group)                                                                                         | 0.787875 | 6.69  | 6.08  | 5.59  | 7.15  | 5.32 | 5.23  | 6.38  | 5.75  | 4.78  | 3.66  |
| 228214_at    | SOX6             | SRY (sex determining region Y)-box 6<br>integrin, beta 1 (fibronectin receptor, beta polypeptide,<br>antigen CD29 includes | 0.787875 | 4.23  | 5.49  | 8.33  | 5.46  | 5.6  | 7.38  | 5.42  | 8.28  | 5.9   | 8.01  |
| 211945_s_at  | ITGB1            | antigen CD29 includes                                                                                                      | 0.787979 | 7.88  | 7.77  | 6.51  | 8.42  | 9.24 | 10.96 | 10.3  | 9.9   | 9.13  | 8.58  |
| 220410_s_at  | CAMSAP1          | calmodulin regulated spectrin-associated protein 1                                                                         | 0.788323 | 6.43  | 6.78  | 3.24  | 4.58  | 5.73 | 4.09  | 6.51  | 7.25  | 6.17  | 4.16  |
| 210663_s_at  | KYNU             | kynureninase (L-kynurenine hydrolase)<br>chaperonin containing TCP1, subunit 6 (zeta) pseudogene 1 ///                     | 0.788468 | 4.95  | 5.09  | 5.5   | 3.69  | 5.74 | 5.48  | 7.65  | 8.88  | 6.23  | 4.92  |
| 227301_at    | CCT6P1 ///       | chaperonin contain                                                                                                         | 0.788591 | 8.02  | 7.9   | 6.61  | 5.23  | 4.57 | 8.62  | 6.92  | 5.07  | 5.19  | 5.32  |
| 242130_at    | ---              | ---                                                                                                                        | 0.788605 | 5.47  | 4.98  | 4.26  | 6.33  | 5.19 | 4.94  | 4.67  | 4.95  | 6.93  | 7.7   |
| 219717_at    | C4orf30          | chromosome 4 open reading frame 30                                                                                         | 0.789082 | 5.12  | 3.75  | 3.04  | 6.31  | 4.6  | 5.86  | 4.9   | 3.23  | 6.6   | 6.09  |
| 225545_at    | EEF2K            | eukaryotic elongation factor-2 kinase                                                                                      | 0.789082 | 5.41  | 5.26  | 3.58  | 4.25  | 7.06 | 6.6   | 5.7   | 6.03  | 7.08  | 5.65  |
| 220019_s_at  | ZNF224           | zinc finger protein 224                                                                                                    | 0.789107 | 7.2   | 7.19  | 3.55  | 4.89  | 6.58 | 5.61  | 5.93  | 8.32  | 6.41  | 3.78  |
| 217848_s_at  | PPA1             | pyrophosphatase (inorganic) 1                                                                                              | 0.789195 | 5.34  | 5.64  | 6.21  | 6.28  | 6.34 | 8.48  | 7.56  | 7.11  | 6.05  | 5.25  |
| 242961_x_at  | DDX58            | DEAD (Asp-Glu-Ala-Asp) box polypeptide 58                                                                                  | 0.789228 | 7.87  | 7.81  | 9.93  | 10.26 | 7.86 | 7.52  | 10.61 | 10.65 | 11.16 | 10.44 |
| 227194_at    | FAM3B            | family with sequence similarity 3, member B<br>hypothetical protein LOC100132279 ///                                       | 0.789316 | 4.5   | 3.76  | 4.47  | 4.54  | 8.37 | 6.76  | 3.9   | 3.92  | 7.84  | 8.56  |
| 1560274_at   | LOC100132279 /// | WTAP associated protein                                                                                                    | 0.789316 | 5.33  | 3.53  | 6.09  | 6.16  | 5.36 | 3.7   | 5.75  | 3.85  | 6.29  | 6.38  |
| 225527_at    | CEBPG            | CCAAT/enhancer binding protein (C/EBP), gamma                                                                              | 0.789316 | 6.66  | 7.72  | 4.92  | 5.55  | 7.88 | 7.7   | 7.79  | 8.86  | 7.81  | 7.99  |

|              |           |                                                                                                                                                |          |      |      |      |      |       |       |       |       |       |       |
|--------------|-----------|------------------------------------------------------------------------------------------------------------------------------------------------|----------|------|------|------|------|-------|-------|-------|-------|-------|-------|
| 239633_at    | ---       | ---                                                                                                                                            | 0.789316 | 7.07 | 5.88 | 5.89 | 7.19 | 4.78  | 5.1   | 6.03  | 5.53  | 7.21  | 7.84  |
| 202371_at    | TCEAL4    | transcription elongation factor A (SII)-like 4                                                                                                 | 0.789396 | 6.77 | 6.31 | 5.22 | 4.6  | 5.12  | 6.86  | 7.52  | 7.3   | 5.38  | 3.53  |
| 237277_at    | ---       | ---                                                                                                                                            | 0.789449 | 6.31 | 6.22 | 3.67 | 4.94 | 4.47  | 3.33  | 3.83  | 6.24  | 3.96  | 3.35  |
| 225890_at    | C20orf72  | chromosome 20 open reading frame 72                                                                                                            | 0.789821 | 8.28 | 8.8  | 5.37 | 6.73 | 8.58  | 7.5   | 7.23  | 8.51  | 8.44  | 6.44  |
| 208949_s_at  | LGALS3    | lectin, galactoside-binding, soluble, 3<br>glutamyl-tRNA(Gln) amidotransferase, subunit C homolog<br>(bacterial)                               | 0.789877 | 6.2  | 6.5  | 6.73 | 6.95 | 8.3   | 8.67  | 7.75  | 9.64  | 6.49  | 8.47  |
| 214711_at    | GATC      | phosphorylase kinase, beta                                                                                                                     | 0.790357 | 5.18 | 6.07 | 3.88 | 5.52 | 5.55  | 3.23  | 3.76  | 6.08  | 5.8   | 7.9   |
| 238601_at    | PHKB      | integrin, alpha 4 (antigen CD49D, alpha 4 subunit of VLA-4<br>receptor)                                                                        | 0.790357 | 5.3  | 6.62 | 5.55 | 6.59 | 7.13  | 8.21  | 6.85  | 7.27  | 6.13  | 3.49  |
| 213416_at    | ITGA4     | phosphodiesterase 4D interacting protein                                                                                                       | 0.790866 | 8.59 | 9.1  | 5.12 | 7.89 | 8.8   | 8.48  | 8.97  | 8.11  | 8.52  | 7.43  |
| 214129_at    | PDE4DIP   | ubiquitin specific peptidase 47                                                                                                                | 0.790967 | 6.76 | 3.67 | 4.22 | 4.98 | 5.4   | 7.92  | 6.48  | 3.91  | 5.55  | 3.87  |
| 223701_s_at  | USP47     | ribosomal protein S18                                                                                                                          | 0.791035 | 4.8  | 5.29 | 8.05 | 6.57 | 5.49  | 6.82  | 6.42  | 4.91  | 4.91  | 3.6   |
| 201049_s_at  | RPS18     | prion protein                                                                                                                                  | 0.791665 | 9.48 | 10   | 8.79 | 9.81 | 10.96 | 11.85 | 11.75 | 11.36 | 10.41 | 11.36 |
| 201300_s_at  | PRNP      | Talin 1                                                                                                                                        | 0.792504 | 5.72 | 6.4  | 3.81 | 5.58 | 6.81  | 7.07  | 7.76  | 7.88  | 5.69  | 5.96  |
| 227505_at    | ---       | ---                                                                                                                                            | 0.792504 | 7.8  | 7.92 | 5.27 | 7.58 | 7.86  | 6.35  | 5.63  | 5.81  | 6.53  | 4.13  |
| 232763_at    | TLN1      | Hypothetical LOC728190                                                                                                                         | 0.792504 | 4.64 | 4.22 | 4.12 | 6.61 | 4.98  | 5.28  | 5.19  | 4.08  | 6.71  | 6.65  |
| 1558794_at   | LOC728190 | mitochondrial ribosomal protein L3                                                                                                             | 0.792722 | 7.49 | 7.76 | 6.92 | 7.32 | 7.42  | 6.78  | 6.93  | 7.11  | 4.8   | 3.91  |
| 208787_at    | MRPL3     | G protein-coupled receptor 89A                                                                                                                 | 0.792982 | 3.76 | 4.13 | 4.48 | 5.27 | 5.89  | 7.86  | 7     | 7.93  | 4.77  | 4.96  |
| 225463_x_at  | GPR89A    | heparan sulfate (glucosamine) 3-O-sulfotransferase 3B1                                                                                         | 0.792982 | 6.82 | 6.07 | 4.15 | 5.22 | 6.68  | 6.84  | 7.28  | 7.35  | 6.94  | 7.04  |
| 227361_at    | HS3ST3B1  | ---                                                                                                                                            | 0.793021 | 5.26 | 5.91 | 6.65 | 6.4  | 5.63  | 3.34  | 3.59  | 3.44  | 6.32  | 2.66  |
| 1565860_at   | ---       | ---                                                                                                                                            | 0.79324  | 5.98 | 5.37 | 3.91 | 5.92 | 3.85  | 4.82  | 6.23  | 5.35  | 6.6   | 6.89  |
| 216782_at    | ---       | ---                                                                                                                                            | 0.793995 | 8.05 | 6.11 | 6.01 | 8.12 | 6.07  | 5.81  | 6.77  | 4.85  | 7.34  | 8.45  |
| 1562481_at   | ---       | ---                                                                                                                                            | 0.794064 | 8.24 | 7.2  | 7.98 | 8.42 | 6.97  | 8.42  | 6.5   | 4.85  | 8.96  | 7.53  |
| 242814_at    | SERPINB9  | serpin peptidase inhibitor, clade B (ovalbumin), member 9                                                                                      | 0.79432  | 5.98 | 6.67 | 7.79 | 6.5  | 5.75  | 3.65  | 4.42  | 5.29  | 5.43  | 5.21  |
| 228945_s_at  | SLC39A8   | Solute carrier family 39 (zinc transporter), member 8                                                                                          | 0.794612 | 4.69 | 4.65 | 5.43 | 5.88 | 5.75  | 5.05  | 7.04  | 6.84  | 5.18  | 7.67  |
| 215891_s_at  | GM2A      | GM2 ganglioside activator                                                                                                                      | 0.794748 | 5.35 | 5.93 | 9.81 | 9.39 | 5.66  | 6.2   | 8.64  | 9.07  | 4.91  | 4.33  |
| 1552788_a_at | HELB      | helicase (DNA) B                                                                                                                               | 0.794748 | 7.78 | 7.67 | 4.39 | 6.38 | 7.05  | 6.43  | 7.26  | 5.47  | 7.06  | 7.47  |
| 227135_at    | NAAA      | N-acylethanolamine acid amidase                                                                                                                | 0.794748 | 8.38 | 8.43 | 6.02 | 6.65 | 8.16  | 7.8   | 8.15  | 7.18  | 6.35  | 5.34  |
| 1554309_at   | EIF4G3    | eukaryotic translation initiation factor 4 gamma, 3                                                                                            | 0.794748 | 7.46 | 6.27 | 6.57 | 7.72 | 6.39  | 3.91  | 5.41  | 7.31  | 6.16  | 7.65  |
| 237895_at    | ---       | ---                                                                                                                                            | 0.79484  | 7.54 | 6.96 | 3.54 | 6.07 | 5.36  | 3.14  | 5.48  | 5.08  | 6.69  | 4.06  |
| 200036_s_at  | RPL10A    | ribosomal protein L10a                                                                                                                         | 0.796023 | 7.79 | 8.2  | 6.69 | 8.09 | 9.21  | 10.59 | 10.36 | 9.67  | 8.07  | 8.95  |
| 218281_at    | MRPL48    | mitochondrial ribosomal protein L48                                                                                                            | 0.796067 | 4.13 | 6.09 | 3.66 | 5.38 | 6.32  | 5.72  | 7.09  | 5.12  | 6.09  | 7.05  |
| 222163_s_at  | SPATA5L1  | spermatogenesis associated 5-like 1                                                                                                            | 0.796272 | 5.23 | 6.49 | 3.39 | 6.58 | 5.15  | 5.19  | 5.8   | 4.31  | 6.56  | 5.79  |
| 228901_at    | CDK9      | Cyclin-dependent kinase 9                                                                                                                      | 0.796272 | 6.1  | 6.52 | 7.83 | 5.94 | 5.13  | 4.02  | 4.09  | 5.36  | 6.61  | 5.55  |
| 244063_at    | BTN2A1    | butyrophilin, subfamily 2, member A1                                                                                                           | 0.796272 | 6.64 | 7.65 | 3.89 | 5.73 | 6.5   | 5.25  | 5.35  | 5.41  | 5.53  | 5.02  |
| 201913_s_at  | COASY     | Coenzyme A synthase                                                                                                                            | 0.796404 | 8.29 | 8.23 | 6.41 | 7.97 | 8.55  | 10.02 | 7.93  | 8.61  | 7.75  | 6.68  |
| 208968_s_at  | CIAPIN1   | cytokine induced apoptosis inhibitor 1                                                                                                         | 0.796404 | 6.55 | 6.07 | 4.16 | 5.83 | 5.6   | 7.47  | 6.97  | 7.3   | 6.19  | 4.6   |
| 210970_s_at  | IBTK      | inhibitor of Bruton agammaglobulinemia tyrosine kinase<br>UDP-N-acetyl-alpha-D-galactosamine:polypeptide N-<br>acetylgalactosaminyltransferase | 0.796502 | 5.47 | 6.41 | 3.64 | 5.24 | 6.92  | 6.72  | 7.14  | 7.54  | 5.95  | 4.84  |
| 212256_at    | GALNT10   | interleukin 1 receptor, type I                                                                                                                 | 0.796502 | 8.65 | 9.32 | 6.59 | 7.76 | 8.79  | 5.62  | 8.34  | 8.48  | 7.83  | 8.56  |
| 202948_at    | IL1R1     | ---                                                                                                                                            | 0.796758 | 7.13 | 7.09 | 5.31 | 6.7  | 8.53  | 5.65  | 6.05  | 4.9   | 4.83  | 5.47  |

|              |               |                                                                              |          |      |      |      |      |      |      |       |       |      |      |
|--------------|---------------|------------------------------------------------------------------------------|----------|------|------|------|------|------|------|-------|-------|------|------|
| 239688_at    | SMC1A         | structural maintenance of chromosomes 1A                                     | 0.79708  | 6.58 | 6.58 | 3.45 | 6.75 | 7.3  | 5.88 | 6.45  | 7.57  | 7.26 | 6.2  |
| 223658_at    | KCNK6         | potassium channel, subfamily K, member 6                                     | 0.797624 | 7.73 | 8.21 | 4.41 | 6.54 | 6.85 | 6.14 | 7.14  | 5.95  | 7    | 6.74 |
| 1552928_s_at | MAP3K7IP3     | mitogen-activated protein kinase kinase 7 interacting protein 3              | 0.798002 | 6.56 | 5.98 | 3.43 | 5.72 | 7.25 | 5.21 | 4.46  | 3.98  | 6.13 | 5.44 |
| 238598_s_at  | ---           | ---                                                                          | 0.798002 | 7.34 | 6.04 | 5.03 | 5.9  | 7.11 | 7.85 | 5.53  | 4.45  | 7.2  | 7.8  |
| 224675_at    | MESDC2        | mesoderm development candidate 2                                             | 0.79852  | 8.29 | 9.06 | 7.79 | 7.47 | 9.12 | 9.57 | 9.88  | 10.04 | 8.88 | 6.97 |
| 239648_at    | DCUN1D3       | DCN1, defective in cullin neddylation 1, domain containing 3 (S. cerevisiae) | 0.798698 | 6.26 | 4.81 | 7.93 | 7.19 | 7.59 | 6.37 | 5.51  | 7.19  | 5.57 | 5.03 |
| 1567080_s_at | CLN6          | ceroid-lipofuscinosis, neuronal 6, late infantile, variant                   | 0.799128 | 9.4  | 9.69 | 8.28 | 7.06 | 7.63 | 4.24 | 8.81  | 8.83  | 7.12 | 6.22 |
| 207761_s_at  | METTL7A       | methyltransferase like 7A                                                    | 0.799128 | 6.59 | 8.67 | 7.41 | 6.12 | 9.59 | 9.81 | 9.6   | 9.81  | 8.72 | 9.45 |
| 235126_at    | LQK1          | hypothetical LOC642946                                                       | 0.799166 | 5.99 | 7.67 | 3.46 | 6.11 | 7.02 | 5.53 | 7.09  | 7.39  | 7.22 | 6.81 |
| 1562303_at   | ZKSCAN3       | zinc finger with KRAB and SCAN domains 3                                     | 0.799242 | 5.36 | 4.43 | 5.5  | 4.6  | 5.32 | 7.06 | 7.57  | 6.31  | 6.21 | 6.93 |
| 228662_at    | SOCS7         | Suppressor of cytokine signaling 7                                           | 0.799275 | 6.54 | 5.7  | 4.84 | 5.86 | 6.94 | 9.15 | 7.41  | 5.47  | 7.04 | 6.22 |
| 203344_s_at  | RBBP8         | retinoblastoma binding protein 8                                             | 0.799417 | 6.42 | 5.92 | 3.36 | 5.65 | 6.44 | 2.93 | 5.05  | 6.39  | 6.14 | 2.87 |
| 222623_s_at  | ZNF639        | zinc finger protein 639                                                      | 0.799417 | 6.01 | 6.94 | 4.84 | 7.41 | 6.83 | 4.69 | 6.28  | 4.93  | 5.54 | 7.15 |
| 209419_at    | THOC5         | THO complex 5                                                                | 0.799443 | 6.55 | 6.38 | 4.28 | 6.11 | 6.58 | 4.09 | 4.79  | 5.38  | 6.04 | 7.03 |
| 229501_s_at  | USP8          | ubiquitin specific peptidase 8                                               | 0.799443 | 6.28 | 7.09 | 4.37 | 7.14 | 5.41 | 5.14 | 5.22  | 4.17  | 5.2  | 5.6  |
| 238348_x_at  | ---           | ---                                                                          | 0.799558 | 8.02 | 5.44 | 7.95 | 8.05 | 5.55 | 6.72 | 6.18  | 5.85  | 7.48 | 5.8  |
| 243505_at    | MAP3K3        | Mitogen-activated protein kinase kinase kinase 3                             | 0.799573 | 6.73 | 7.9  | 4.81 | 5.15 | 6.11 | 4.26 | 6.58  | 6.44  | 7.25 | 5.51 |
| 221215_s_at  | RIPK4         | receptor-interacting serine-threonine kinase 4                               | 0.799573 | 7.73 | 7.67 | 5.59 | 5.8  | 7.18 | 6.03 | 6.12  | 5.13  | 5.9  | 4.77 |
| 220813_at    | CYSLTR2       | cysteinyl leukotriene receptor 2                                             | 0.800511 | 7.68 | 8.4  | 3.23 | 6.1  | 8.86 | 8.97 | 7.25  | 8.62  | 8.51 | 6.52 |
| 213564_x_at  | LDHB          | lactate dehydrogenase B                                                      | 0.800754 | 7.75 | 7.18 | 2.75 | 7.46 | 9.47 | 9.74 | 10.71 | 8.64  | 8.6  | 7.88 |
| 242676_at    | ---           | ---                                                                          | 0.801154 | 6.38 | 5.82 | 4.86 | 6.11 | 6.98 | 6.65 | 4.86  | 3.27  | 6.02 | 7.76 |
| 240146_at    | ---           | ---                                                                          | 0.801154 | 7.11 | 6.51 | 7.64 | 7.14 | 6.03 | 7.45 | 5.47  | 4.93  | 7.08 | 8.14 |
| 217933_s_at  | LAP3          | leucine aminopeptidase 3                                                     | 0.801225 | 6.64 | 7.67 | 8.72 | 9.06 | 7.97 | 7.83 | 6.96  | 7.46  | 7.16 | 5.35 |
| 210538_s_at  | BIRC3         | baculoviral IAP repeat-containing 3                                          | 0.801317 | 6.27 | 7.29 | 4.63 | 5.01 | 6.61 | 5    | 6.3   | 6.44  | 6.1  | 4.11 |
| 214557_at    | PTTG2         | pituitary tumor-transforming 2                                               | 0.801317 | 6.35 | 5.62 | 4.13 | 5.72 | 5.35 | 5.13 | 6.85  | 5.97  | 7.58 | 7.54 |
| 217659_at    | ---           | ---                                                                          | 0.801581 | 7.09 | 6.02 | 3.42 | 6.86 | 6.17 | 2.39 | 6.17  | 6.79  | 7.45 | 5.66 |
| 212296_at    | PSMD14        | proteasome (prosome, macropain) 26S subunit, non-ATPase, 14                  | 0.801845 | 5.11 | 4.09 | 3.97 | 5.07 | 7.07 | 5.9  | 7.1   | 7.42  | 4.73 | 6.59 |
| 202003_s_at  | ACAA2         | acetyl-Coenzyme A acyltransferase 2                                          | 0.801885 | 6.87 | 7.41 | 4.56 | 6.18 | 7.7  | 7.6  | 8.09  | 7.34  | 7.6  | 7.45 |
| 242004_x_at  | ---           | ---                                                                          | 0.803153 | 4.43 | 7.6  | 5.36 | 4.03 | 4.4  | 4.24 | 6.1   | 3.81  | 7.71 | 4.04 |
| 210825_s_at  | PEBP1         | phosphatidylethanolamine binding protein 1                                   | 0.803556 | 6.51 | 5.65 | 6.51 | 5.98 | 7.04 | 8.27 | 9.19  | 8.26  | 5.95 | 6.96 |
| 240054_at    | ---           | ---                                                                          | 0.803909 | 7.45 | 7.86 | 6.65 | 5.18 | 3.99 | 6.12 | 4.53  | 7.67  | 6.67 | 4.42 |
| 237901_at    | ---           | ---                                                                          | 0.803909 | 7.32 | 5.81 | 9.07 | 8.65 | 5.9  | 7.52 | 7.69  | 6.65  | 7.74 | 8.76 |
| 224977_at    | C6orf89       | chromosome 6 open reading frame 89                                           | 0.804172 | 8.6  | 8.48 | 7.71 | 9.01 | 9.17 | 9.91 | 6.66  | 6.23  | 8.47 | 6.51 |
| 228493_at    | NKAP          | NFKB activating protein                                                      | 0.805943 | 6.21 | 6.44 | 3.12 | 4.84 | 6.42 | 3.58 | 4.99  | 2.73  | 4.96 | 4.02 |
| 217409_at    | ---           | ---                                                                          | 0.806411 | 7.33 | 7.37 | 5.5  | 7.89 | 6.91 | 6.16 | 7.69  | 7.68  | 7.58 | 4.6  |
| 235540_at    | GNRH1         | gonadotropin-releasing hormone 1 (luteinizing-releasing hormone)             | 0.806444 | 7.65 | 7.15 | 6.84 | 8.72 | 7.16 | 4.4  | 7.15  | 7.71  | 6.93 | 6.28 |
| 224795_x_at  | IGK@ /// IGKC | immunoglobulin kappa locus /// immunoglobulin kappa constant                 | 0.806446 | 5.45 | 9.24 | 4.74 | 5.93 | 7.91 | 8.3  | 9.43  | 8.32  | 6.58 | 6.51 |
| 1556186_s_at | KIAA0090      | KIAA0090                                                                     | 0.806446 | 6.04 | 5.6  | 3.31 | 4.58 | 3.92 | 5.69 | 6.42  | 4.58  | 6.04 | 3.45 |

|              |         |                                                                    |          |       |       |       |       |      |      |       |      |      |       |
|--------------|---------|--------------------------------------------------------------------|----------|-------|-------|-------|-------|------|------|-------|------|------|-------|
| 235446_at    | ---     | ---                                                                | 0.806493 | 6.74  | 6.32  | 6.2   | 7.51  | 3.69 | 3.92 | 4.23  | 4    | 3.8  | 3.95  |
| 240022_at    | ZC3H4   | Zinc finger CCCH-type containing 4                                 | 0.806815 | 6.47  | 5.97  | 4.42  | 4.33  | 7.87 | 3.77 | 5.72  | 7.89 | 7.5  | 11.17 |
| 1558103_a_at | ---     | ---                                                                | 0.806863 | 7.54  | 7.52  | 6.71  | 7.88  | 6.46 | 5.55 | 5.21  | 4.76 | 6.75 | 3.48  |
| 1552693_at   | ARL11   | ADP-ribosylation factor-like 11                                    | 0.807368 | 5.54  | 6.28  | 4.71  | 6.32  | 5.23 | 7.38 | 4.4   | 4.79 | 4.5  | 3.15  |
| 1557275_a_at | ---     | ---                                                                | 0.807849 | 8.52  | 6.37  | 5.63  | 6.57  | 6.2  | 4.72 | 5.78  | 5.23 | 5.96 | 4.91  |
| 1555464_at   | IFIH1   | interferon induced with helicase C domain 1                        | 0.808131 | 5.73  | 6.2   | 6.48  | 6.69  | 4.83 | 5.69 | 4.37  | 3.14 | 6.28 | 6.01  |
| 240747_at    | ---     | ---                                                                | 0.808651 | 3.25  | 3.5   | 7.6   | 5.27  | 5.52 | 6.67 | 5.72  | 5.69 | 5.48 | 6.82  |
| 215485_s_at  | ICAM1   | intercellular adhesion molecule 1                                  | 0.808719 | 9.3   | 8.2   | 10.49 | 10.11 | 8.06 | 7.58 | 7.33  | 7.48 | 8.03 | 7.44  |
| 76897_s_at   | FKBP15  | FK506 binding protein 15, 133kDa                                   | 0.8088   | 6.04  | 4.93  | 5.39  | 6.66  | 5.66 | 6.07 | 6.6   | 6.2  | 4.54 | 3.29  |
| 201855_s_at  | ATMIN   | ATM interactor                                                     | 0.809163 | 4.76  | 6.11  | 4.51  | 5.56  | 6.83 | 7.56 | 7.32  | 6.53 | 7.18 | 3.75  |
| 1559812_at   | ---     | ---                                                                | 0.809439 | 6.52  | 6.57  | 3.95  | 6.2   | 5.14 | 7.76 | 8.25  | 5.97 | 8.83 | 9.06  |
| 1560169_at   | ---     | ---                                                                | 0.809439 | 6.87  | 8.24  | 4.59  | 6.78  | 7.62 | 5.2  | 6.93  | 4.65 | 7.59 | 7.16  |
| 227141_at    | TYW3    | tRNA-yW synthesizing protein 3 homolog ( <i>S. cerevisiae</i> )    | 0.809449 | 3.77  | 4.18  | 3.98  | 3.63  | 6.21 | 6.2  | 6.01  | 6.36 | 5.79 | 3.68  |
| 213174_at    | TTC9    | tetratricopeptide repeat domain 9                                  | 0.809449 | 10.23 | 10.49 | 8.78  | 8.42  | 8.99 | 7.38 | 8.03  | 6.9  | 8.83 | 8.65  |
| 224517_at    | POLR2J4 | polymerase (RNA) II (DNA directed) polypeptide J4, pseudogene      | 0.810136 | 6.9   | 6.82  | 4.32  | 5.65  | 6.44 | 4.42 | 5.3   | 4.12 | 6.65 | 6.2   |
| 214719_at    | SLC46A3 | solute carrier family 46, member 3                                 | 0.810286 | 5.8   | 6.08  | 4.48  | 6.78  | 6.21 | 5.83 | 5.6   | 5.48 | 5.52 | 3.15  |
| 237076_at    | NCSTN   | nicastrin                                                          | 0.810368 | 7.12  | 8.3   | 5.37  | 7.03  | 7.13 | 7.01 | 6.71  | 8.62 | 7.45 | 5.45  |
| 1560145_at   | MKLN1   | Muskelin 1, intracellular mediator containing kelch motifs         | 0.810368 | 8.43  | 7.13  | 5.44  | 7.74  | 7.05 | 8.08 | 8.34  | 6.8  | 8.86 | 6.64  |
| 1555315_a_at | MAK     | male germ cell-associated kinase                                   | 0.81065  | 7.04  | 7.27  | 5.79  | 7.04  | 8.18 | 5.88 | 6.54  | 8.12 | 6.54 | 4.34  |
| 214157_at    | GNAS    | GNAS complex locus                                                 | 0.810946 | 6.9   | 6.52  | 3.61  | 5.96  | 6.41 | 6.22 | 5.12  | 3.37 | 7.52 | 6.33  |
| 203542_s_at  | KLF9    | Kruppel-like factor 9                                              | 0.810967 | 4.66  | 4.72  | 6.77  | 4.73  | 6.65 | 8.18 | 7.23  | 6.88 | 6.86 | 5.87  |
| 224744_at    | IMPAD1  | inositol monophosphatase domain containing 1                       | 0.811439 | 5.91  | 5.25  | 3.57  | 5.08  | 4.86 | 5.66 | 6.78  | 8.47 | 6.16 | 4.25  |
| 1405_i_at    | CCL5    | chemokine (C-C motif) ligand 5                                     | 0.811449 | 6.07  | 3.11  | 7.19  | 7.21  | 6    | 9.79 | 10.02 | 9.64 | 7.18 | 7.45  |
| 237974_at    | ABHD12B | abhydrolase domain containing 12B                                  | 0.811449 | 7.52  | 5.88  | 3.34  | 5.74  | 5.01 | 7.24 | 4.98  | 4.64 | 6.05 | 3.71  |
| 209861_s_at  | METAP2  | methionyl aminopeptidase 2                                         | 0.811527 | 5.52  | 6.53  | 3.58  | 5.4   | 7.09 | 7.65 | 8.29  | 7.42 | 6.07 | 5.4   |
| 213526_s_at  | LIN37   | lin-37 homolog ( <i>C. elegans</i> )                               | 0.811885 | 7.51  | 7.8   | 4.73  | 7.77  | 6.77 | 7.48 | 6.91  | 7.19 | 7.4  | 8.73  |
| 235188_at    | ---     | ---                                                                | 0.811955 | 6.65  | 6.97  | 4.22  | 5.7   | 5.65 | 6.02 | 4.95  | 5.83 | 7.43 | 3.95  |
| 208079_s_at  | AURKA   | aurora kinase A                                                    | 0.81196  | 6.26  | 6.52  | 4.5   | 6.28  | 6.19 | 4.68 | 4.66  | 5.68 | 5.43 | 7.77  |
| 219913_s_at  | CRNKL1  | crooked neck pre-mRNA splicing factor-like 1 ( <i>Drosophila</i> ) | 0.812396 | 6.63  | 6.66  | 3.8   | 7.04  | 7.29 | 5.29 | 6.6   | 6.97 | 6.88 | 6.04  |
| 225961_at    | KLHDC5  | kelch domain containing 5                                          | 0.812614 | 7.33  | 7.57  | 5.14  | 5.8   | 7.43 | 9.08 | 6.66  | 7.44 | 7.78 | 5.54  |
| 244572_at    | KY      | kyphoscoliosis peptidase                                           | 0.813659 | 8     | 7.21  | 9.57  | 9.02  | 6.68 | 7.69 | 6.05  | 8.35 | 8.95 | 9     |
| 1555301_a_at | DIP2A   | DIP2 disco-interacting protein 2 homolog A ( <i>Drosophila</i> )   | 0.814178 | 3.5   | 4.4   | 5.68  | 7.33  | 6.47 | 7.28 | 5.2   | 7.41 | 5.41 | 6.88  |
| 222906_at    | FLVCR1  | feline leukemia virus subgroup C cellular receptor 1               | 0.814572 | 5.88  | 3.01  | 3.95  | 6.57  | 6.58 | 5.42 | 4.57  | 6.17 | 6.25 | 6.43  |
| 218374_s_at  | C12orf4 | chromosome 12 open reading frame 4                                 | 0.814647 | 4.53  | 4.75  | 6.63  | 6.71  | 6.09 | 8.7  | 6.62  | 5.6  | 6.4  | 8.85  |
| 225866_at    | BXDC1   | brix domain containing 1                                           | 0.814656 | 4.59  | 4.71  | 4.47  | 5.44  | 6.54 | 6.23 | 6.6   | 6.47 | 5.16 | 3.84  |
| 1565838_at   | ---     | ---                                                                | 0.814656 | 3.01  | 2.6   | 2.47  | 3.51  | 2.21 | 3.82 | 6.57  | 2.35 | 6.17 | 8.07  |
| 226642_s_at  | NUDCD2  | NudC domain containing 2                                           | 0.814656 | 4.93  | 5.25  | 2.87  | 4.31  | 7.02 | 6.1  | 6.14  | 6.77 | 5.96 | 7.11  |
| 1566549_at   | ---     | ---                                                                | 0.814656 | 4.62  | 3.6   | 3.64  | 4.62  | 3.84 | 5.61 | 6.26  | 6.14 | 6.07 | 4.16  |
| 213097_s_at  | DNAJC2  | DnaJ (Hsp40) homolog, subfamily C, member 2                        | 0.814805 | 6.58  | 7.37  | 4.06  | 6.11  | 6.54 | 5.2  | 7.74  | 6.31 | 6.21 | 7.26  |

|              |                 |                                                                             |          |      |      |      |      |      |      |       |       |      |      |
|--------------|-----------------|-----------------------------------------------------------------------------|----------|------|------|------|------|------|------|-------|-------|------|------|
| 237798_at    | ---             | ---                                                                         | 0.814805 | 7.54 | 6.44 | 5.86 | 6.5  | 7.1  | 6.9  | 6.76  | 4.16  | 6.82 | 8.6  |
| 1555843_at   | HNRNPM          | Heterogeneous nuclear ribonucleoprotein M                                   | 0.815981 | 5.35 | 9.14 | 4.27 | 4.82 | 7.19 | 3.35 | 3.23  | 7.06  | 6.39 | 3.64 |
| 200992_at    | IPO7            | importin 7                                                                  | 0.816316 | 5.21 | 5.88 | 3.59 | 5.53 | 6.63 | 6.63 | 6.98  | 7.01  | 5.95 | 5.86 |
| 234131_at    | ---             | ---                                                                         | 0.816775 | 6.56 | 5.82 | 3.92 | 5.63 | 4.46 | 3.99 | 4.39  | 4.4   | 6.19 | 6.25 |
| 206371_at    | FOLR3           | folate receptor 3 (gamma)                                                   | 0.81745  | 7.17 | 7.05 | 7.99 | 8.66 | 8.06 | 7.58 | 11.72 | 12.04 | 6.93 | 6.73 |
| 225456_at    | MED1            | mediator complex subunit 1                                                  | 0.817853 | 6.99 | 5.56 | 5.13 | 6.17 | 6.65 | 6.56 | 6.21  | 5.73  | 6.7  | 9.57 |
| 202817_s_at  | SS18            | synovial sarcoma translocation, chromosome 18                               | 0.818607 | 5.66 | 5.96 | 4.14 | 5.52 | 6.84 | 7.9  | 6.27  | 6.89  | 5.8  | 5.28 |
| 244249_at    | ---             | ---                                                                         | 0.819083 | 7.98 | 7.86 | 7.22 | 8.03 | 6.92 | 5.88 | 7.03  | 5.12  | 7.31 | 8.44 |
| 201109_s_at  | THBS1           | thrombospondin 1                                                            | 0.819211 | 4.41 | 3.81 | 4.76 | 5.79 | 6.75 | 7.59 | 6.34  | 6.28  | 6.55 | 6.95 |
| 211061_s_at  | MGAT2           | mannosyl (alpha-1,6-)-glycoprotein beta-1,2-N-acetylglucosaminyltransferase | 0.819211 | 6.28 | 5.32 | 9.15 | 7.07 | 7.53 | 8.03 | 6.69  | 5.93  | 6.92 | 6.13 |
| 224202_at    | SUFU            | suppressor of fused homolog (Drosophila)                                    | 0.819911 | 4.95 | 7.57 | 3.8  | 4.13 | 6.43 | 3.44 | 5.29  | 4     | 4.67 | 6.36 |
| 205552_s_at  | OAS1            | 2',5'-oligoadenylate synthetase 1, 40/46kDa                                 | 0.820579 | 5.59 | 6.25 | 8.43 | 8.37 | 9.75 | 9.66 | 7.38  | 8.48  | 8.27 | 6.48 |
| 204103_at    | CCL4            | chemokine (C-C motif) ligand 4                                              | 0.820661 | 7.93 | 6.53 | 9.27 | 8.92 | 7.03 | 7.12 | 7.4   | 6.16  | 8.73 | 8.52 |
| 242019_at    | LASS6           | LAG1 homolog, ceramide synthase 6                                           | 0.820753 | 4.74 | 4.63 | 4.9  | 5.37 | 6.1  | 6.64 | 6.37  | 6.75  | 5.96 | 2.82 |
| 232885_at    | NCRNA00081      | non-protein coding RNA 81                                                   | 0.820938 | 5.17 | 3.62 | 4.17 | 6.23 | 4.4  | 2.48 | 2.81  | 6.78  | 6.13 | 3.21 |
| 1558345_a_at | LOC439911       | hypothetical gene supported by NM_194304                                    | 0.820938 | 8.27 | 7.94 | 6.65 | 8.36 | 7.83 | 6.77 | 8.1   | 8.43  | 8.28 | 5.2  |
| 1558028_x_at | LOC647979       | hypothetical LOC647979                                                      | 0.820938 | 5.77 | 5.24 | 5.09 | 5.77 | 7.08 | 7.15 | 7.62  | 6.52  | 6.35 | 4.32 |
| 239723_at    | ---             | ---                                                                         | 0.821543 | 5.06 | 5.42 | 6.69 | 6.44 | 6.77 | 5.32 | 4.79  | 5.85  | 4.88 | 8.15 |
| 224635_s_at  | BIRC6           | baculoviral IAP repeat-containing 6                                         | 0.821686 | 7.45 | 7.99 | 5.23 | 7.13 | 7.27 | 7    | 7.79  | 7.56  | 7.13 | 4.55 |
| 237424_at    | ---             | ---                                                                         | 0.821686 | 6.56 | 6.5  | 4.68 | 6.78 | 3.6  | 4.24 | 4.6   | 4.08  | 3.98 | 4.08 |
| 225171_at    | ARHGAP18        | Rho GTPase activating protein 18                                            | 0.8217   | 6.67 | 6.3  | 3.37 | 6.22 | 7.45 | 6.24 | 7.59  | 7.2   | 6.48 | 7.7  |
| 230917_at    | ---             | ---                                                                         | 0.821918 | 8.12 | 7.52 | 4.8  | 6.83 | 7.35 | 5.1  | 7.21  | 6.78  | 7.2  | 6.32 |
| 243312_at    | ZNF107          | Zinc finger protein 107                                                     | 0.821957 | 7.5  | 7.34 | 4.66 | 6.01 | 5.38 | 5.28 | 4.44  | 4.73  | 6.07 | 5.32 |
| 232058_at    | ---             | ---                                                                         | 0.822093 | 6.46 | 7.61 | 4.04 | 6.12 | 6.48 | 7.4  | 6     | 6.09  | 7.55 | 5.92 |
| 1555760_a_at | RBM15           | RNA binding motif protein 15                                                | 0.822428 | 7.7  | 7.11 | 8.03 | 6.98 | 7.94 | 6.02 | 7.38  | 9.3   | 7.6  | 5.7  |
| 202230_s_at  | CHERP           | calcium homeostasis endoplasmic reticulum protein                           | 0.822428 | 7.63 | 8.08 | 7.73 | 9.18 | 8.16 | 7.29 | 7     | 5.2   | 8.82 | 8.92 |
| 206042_x_at  | SNRPN /// SNURF | small nuclear ribonucleoprotein polypeptide N /// SNRPN                     | 0.822591 | 6.12 | 5.55 | 5.38 | 7.32 | 6.58 | 9.2  | 7.66  | 6.91  | 7.71 | 9.16 |
| 221842_s_at  | ZNF131          | zinc finger protein 131                                                     | 0.822591 | 6.97 | 6.93 | 4.84 | 7.15 | 7.21 | 5.01 | 6.62  | 6.32  | 7.15 | 4.84 |
| 219543_at    | PBLD            | phenazine biosynthesis-like protein domain containing                       | 0.822591 | 6.28 | 7.95 | 5.96 | 6.9  | 7.7  | 5.31 | 6.12  | 7.9   | 7.58 | 5.33 |
| 211009_s_at  | ZNF271          | zinc finger protein 271                                                     | 0.822659 | 6.78 | 6.68 | 3.69 | 6.65 | 7.57 | 6.96 | 7.08  | 7.99  | 6.45 | 6.16 |
| 204224_s_at  | GCH1            | GTP cyclohydrolase 1                                                        | 0.822785 | 7.01 | 6.37 | 8.14 | 8.2  | 8.1  | 8.17 | 8.68  | 8.33  | 6.9  | 5.52 |
| 1561893_at   | ---             | ---                                                                         | 0.822862 | 8.12 | 6.86 | 6.6  | 7.23 | 5.93 | 7.3  | 7.57  | 9.57  | 7.56 | 8.46 |
| 210293_s_at  | SEC23B          | Sec23 homolog B (S. cerevisiae)                                             | 0.822862 | 7.14 | 7.04 | 5.33 | 7.28 | 7.71 | 7.51 | 6.86  | 7.92  | 6.94 | 4.72 |
| 200893_at    | TRA2B           | transformer 2 beta homolog (Drosophila)                                     | 0.823203 | 7.97 | 7.7  | 6.8  | 7.65 | 8.08 | 7.37 | 8.8   | 7.24  | 7.87 | 5.01 |
| 224481_s_at  | HECTD1          | HECT domain containing 1                                                    | 0.823264 | 7.27 | 7.02 | 3.97 | 7.41 | 6.75 | 6.96 | 6.46  | 7.39  | 7.25 | 6.14 |
| 235380_at    | ---             | ---                                                                         | 0.823465 | 8.18 | 7.95 | 2.91 | 6.9  | 7.77 | 7.22 | 7.69  | 7.04  | 7.71 | 6.54 |
| 1554661_s_at | C1orf71         | chromosome 1 open reading frame 71                                          | 0.823492 | 5.38 | 4.46 | 5.21 | 5.72 | 5.88 | 7.34 | 6.47  | 6.23  | 5.7  | 3.61 |
| 235412_at    | ARHGEF7         | Rho guanine nucleotide exchange factor (GEF) 7                              | 0.823663 | 6.97 | 6.81 | 3.93 | 5.85 | 5.3  | 6.25 | 6.34  | 6.1   | 5.81 | 7.94 |
| 224959_at    | SLC26A2         | solute carrier family 26 (sulfate transporter), member 2                    | 0.82446  | 6.36 | 5.04 | 3.18 | 4.71 | 6.15 | 6.22 | 6.77  | 6.18  | 6.25 | 4.66 |
| 209658_at    | CDC16           | cell division cycle 16 homolog (S. cerevisiae)                              | 0.824481 | 3.99 | 4.23 | 4.17 | 4.37 | 5.15 | 2.49 | 5.63  | 6.13  | 6.3  | 6.36 |

|              |          |                                                                    |          |      |      |      |      |      |       |      |      |      |      |
|--------------|----------|--------------------------------------------------------------------|----------|------|------|------|------|------|-------|------|------|------|------|
| 207224_s_at  | SIGLEC7  | sialic acid binding Ig-like lectin 7                               | 0.824481 | 7.75 | 8.47 | 7.6  | 7.96 | 7.71 | 7.71  | 7.32 | 6.59 | 8.22 | 4.91 |
| 205809_s_at  | WASL     | Wiskott-Aldrich syndrome-like                                      | 0.824495 | 6.28 | 8.09 | 5.02 | 4.94 | 5.24 | 5.17  | 5.55 | 3.86 | 6.13 | 2.97 |
| 203015_s_at  | SSX2IP   | synovial sarcoma, X breakpoint 2 interacting protein               | 0.824495 | 6.59 | 6.51 | 5.57 | 5.98 | 5.58 | 5.82  | 6.74 | 9.96 | 6.5  | 4.8  |
| 232384_s_at  | ---      | ---                                                                | 0.824495 | 6.8  | 5.25 | 4.62 | 6.7  | 5.59 | 4.49  | 5.5  | 4.52 | 6.23 | 7.35 |
| 226296_s_at  | MRPS15   | mitochondrial ribosomal protein S15                                | 0.824495 | 7.63 | 5.62 | 6.84 | 5.15 | 7.17 | 7.35  | 7.54 | 8.83 | 6.84 | 7.07 |
| 1569206_at   | TCP11L2  | t-complex 11 (mouse)-like 2                                        | 0.824503 | 9.98 | 8.02 | 7.07 | 9.64 | 7.55 | 6.48  | 8.16 | 7.56 | 8.87 | 8.86 |
| 216275_at    | BUB1     | budding uninhibited by benzimidazoles 1 homolog (yeast)            | 0.824534 | 5.31 | 5.25 | 8.16 | 5.45 | 5.86 | 5.56  | 6.24 | 8.12 | 5.13 | 7.24 |
| 222838_at    | SLAMF7   | SLAM family member 7                                               | 0.824636 | 6.45 | 5.32 | 4.51 | 7.2  | 6.34 | 4.02  | 9.28 | 7.27 | 6.77 | 7.72 |
| 209198_s_at  | SYT11    | synaptotagmin XI                                                   | 0.824636 | 4.98 | 4.85 | 4.37 | 5.65 | 5.51 | 3.86  | 7.27 | 6.71 | 5.53 | 7.8  |
| 238647_at    | C14orf28 | chromosome 14 open reading frame 28                                | 0.825367 | 5.16 | 5.15 | 6.01 | 5.55 | 6.96 | 5.17  | 4.15 | 5.83 | 4.91 | 7.71 |
| 243108_at    | RANBP9   | RAN binding protein 9                                              | 0.82548  | 6.46 | 6.08 | 4.11 | 6.41 | 6.22 | 3.92  | 4.28 | 4.12 | 5.6  | 4.72 |
| 223071_at    | IER3IP1  | immediate early response 3 interacting protein 1                   | 0.825699 | 4.7  | 6.03 | 6.09 | 4.31 | 5.97 | 7.95  | 5.86 | 5.33 | 6.44 | 6.74 |
| 1570360_s_at | DDX3Y    | DEAD (Asp-Glu-Ala-Asp) box polypeptide 3, Y-linked                 | 0.825739 | 3.77 | 3.97 | 4.96 | 4.6  | 6.2  | 5.91  | 7.17 | 6.49 | 5.55 | 7    |
| 226787_at    | ZNF18    | zinc finger protein 18                                             | 0.825739 | 7.58 | 7.5  | 4.08 | 6.85 | 6.96 | 6.09  | 5.92 | 5.91 | 8.2  | 7.37 |
| 1567032_s_at | ZNF160   | zinc finger protein 160                                            | 0.825739 | 5.67 | 6.02 | 4.97 | 6.28 | 4.69 | 8.51  | 6.57 | 5.51 | 5.37 | 4.61 |
| 234616_at    | ---      | ---                                                                | 0.825995 | 6.83 | 7.3  | 6.7  | 7.71 | 6.44 | 5.88  | 4.41 | 4.26 | 8.82 | 8.99 |
| 240271_at    | ---      | ---                                                                | 0.826431 | 6.33 | 5.35 | 5.81 | 6.95 | 4.42 | 4.31  | 4.98 | 7.18 | 7.1  | 6.24 |
| 1554660_a_at | C1orf71  | chromosome 1 open reading frame 71                                 | 0.826445 | 6.89 | 6.7  | 5.67 | 7.04 | 6.85 | 8.7   | 7.63 | 5.34 | 7.75 | 8.43 |
| 1559776_at   | ---      | ---                                                                | 0.82724  | 4.14 | 4.67 | 6.8  | 7.36 | 4.96 | 4.22  | 6.18 | 7.09 | 3.63 | 3.77 |
| 228727_at    | ANXA11   | annexin A11                                                        | 0.82724  | 6.61 | 6.77 | 4.84 | 6.24 | 5.45 | 5.64  | 5.79 | 4.77 | 5.04 | 3.27 |
| 208683_at    | CAPN2    | calpain 2, (m/II) large subunit                                    | 0.827313 | 4.36 | 4.86 | 2.88 | 5.55 | 6.47 | 7     | 6.7  | 6.58 | 6.25 | 3.02 |
| 226643_s_at  | NUDCD2   | NudC domain containing 2                                           | 0.827313 | 4.57 | 5.16 | 3.71 | 4.44 | 7.16 | 5.84  | 5.91 | 6.71 | 5.51 | 6.76 |
| 201326_at    | CCT6A    | chaperonin containing TCP1, subunit 6A (zeta 1)                    | 0.827426 | 6.64 | 8    | 5.46 | 5.73 | 7.53 | 8.16  | 8.49 | 7.8  | 6.24 | 4.14 |
| 44111_at     | VPS33B   | vacuolar protein sorting 33 homolog B (yeast)                      | 0.827735 | 6.21 | 3.7  | 4.35 | 6.3  | 5.27 | 5.2   | 6.05 | 4.48 | 3.64 | 7.1  |
| 242625_at    | RSAD2    | radical S-adenosyl methionine domain containing 2                  | 0.828261 | 6.17 | 6.45 | 8.22 | 8.35 | 8.84 | 8.37  | 4.97 | 6.21 | 8.28 | 7.51 |
| 214677_x_at  | IGL@     | immunoglobulin lambda locus                                        | 0.828261 | 5.36 | 8.1  | 5.45 | 5.65 | 7.67 | 7.9   | 8.73 | 6.6  | 6.14 | 7.17 |
| 205997_at    | ADAM28   | ADAM metallopeptidase domain 28                                    | 0.828261 | 6.47 | 7.04 | 5.73 | 6.13 | 5.69 | 3.95  | 4.85 | 5.29 | 7.48 | 6.71 |
| 1557749_at   | EHBP1L1  | EH domain binding protein 1-like 1                                 | 0.8286   | 8.03 | 7.44 | 7.8  | 6.35 | 7.54 | 3.03  | 4.29 | 8.94 | 6.62 | 2.79 |
| 205703_at    | ---      | ---                                                                | 0.828628 | 7.05 | 8.93 | 5.37 | 5.28 | 8.13 | 7.6   | 7.58 | 8.33 | 7.88 | 8.28 |
| 1570124_at   | ---      | ---                                                                | 0.828821 | 6.75 | 4.6  | 6.08 | 5.26 | 5.84 | 4.06  | 4.34 | 4.72 | 4.35 | 7.72 |
| 209459_s_at  | ABAT     | 4-aminobutyrate aminotransferase                                   | 0.828998 | 5.48 | 6.24 | 4.86 | 6.78 | 7.04 | 7.14  | 6.1  | 6.6  | 6.43 | 3.93 |
| 49452_at     | ACACB    | acetyl-Coenzyme A carboxylase beta                                 | 0.829369 | 6.85 | 8.07 | 4.84 | 4.79 | 6.49 | 6.83  | 8    | 8.03 | 7.54 | 6.79 |
| 234864_s_at  | TRPM6    | transient receptor potential cation channel, subfamily M, member 6 | 0.829692 | 6.69 | 6.52 | 4.55 | 6.07 | 5.43 | 3.87  | 4.96 | 4.13 | 6.33 | 4.33 |
| 230315_at    | ---      | ---                                                                | 0.829833 | 8.66 | 6.09 | 8.45 | 8.93 | 6.55 | 7.22  | 5.98 | 7.11 | 7.01 | 8.83 |
| 238055_at    | ATP8B1   | ATPase, class I, type 8B, member 1                                 | 0.829833 | 3.87 | 6.32 | 3.44 | 4.5  | 6.24 | 7.19  | 4.71 | 3.88 | 4.82 | 6.8  |
| 221071_at    | ---      | ---                                                                | 0.829833 | 8.55 | 8.7  | 6    | 6.85 | 8.41 | 9.69  | 7.96 | 7.49 | 9.13 | 6.96 |
| 1555011_at   | ZFYVE16  | zinc finger, FYVE domain containing 16                             | 0.829833 | 6.63 | 5.7  | 5.19 | 6.75 | 6.3  | 4.49  | 6.06 | 3.96 | 6.61 | 7.67 |
| 241441_at    | ---      | ---                                                                | 0.830054 | 6.77 | 4.57 | 3.44 | 6.51 | 6.48 | 5.39  | 6.55 | 6.92 | 5.25 | 4.22 |
| 224534_at    | KREMEN1  | kringle containing transmembrane protein 1                         | 0.830103 | 6.8  | 7.1  | 8.4  | 7.47 | 7.29 | 5.35  | 6.5  | 6.29 | 4.91 | 3.75 |
| 1560396_at   | KLHL6    | kelch-like 6 (Drosophila)                                          | 0.830622 | 8.16 | 8.73 | 6.08 | 9.29 | 9.13 | 11.16 | 8.83 | 8.81 | 9.51 | 8.9  |
| 222028_at    | ZNF45    | zinc finger protein 45                                             | 0.830792 | 4.97 | 5.93 | 3.85 | 3.42 | 6.02 | 4.66  | 5.82 | 7.27 | 6.37 | 6.93 |
| 1562957_at   | ---      | ---                                                                | 0.830864 | 6.44 | 7.47 | 3.02 | 7.14 | 6.53 | 6.08  | 6.38 | 5.11 | 6.53 | 6.48 |

|              |                  |                                                                                   |          |      |      |       |      |      |      |      |       |       |       |
|--------------|------------------|-----------------------------------------------------------------------------------|----------|------|------|-------|------|------|------|------|-------|-------|-------|
| 242117_at    | ---              | ---                                                                               | 0.831027 | 8.33 | 8.49 | 4.76  | 7.48 | 8.24 | 6.36 | 8.17 | 6.3   | 8.66  | 8.54  |
| 1556175_at   | MTSS1L           | metastasis suppressor 1-like                                                      | 0.83123  | 5.74 | 5.7  | 3.62  | 5.19 | 5.08 | 4.45 | 6.2  | 4.92  | 6.1   | 7.83  |
| 225250_at    | STIM2            | stromal interaction molecule 2                                                    | 0.831329 | 6.87 | 5.67 | 5.53  | 5.77 | 5.47 | 3.35 | 4.15 | 6.48  | 5.16  | 6.4   |
| 209164_s_at  | CYB561           | cytochrome b-561                                                                  | 0.831626 | 7.75 | 8.24 | 6.65  | 7.33 | 6.43 | 6.86 | 6.08 | 6.94  | 8.26  | 9.72  |
| 1568768_s_at | BRE              | brain and reproductive organ-expressed (TNFRSF1A modulator)                       | 0.831643 | 9.57 | 7.38 | 10.47 | 8.67 | 7.65 | 8.81 | 9.81 | 9.51  | 10.59 | 6.52  |
| 238631_at    | ZNF140           | Zinc finger protein 140                                                           | 0.831931 | 6.39 | 5.69 | 3.6   | 5.83 | 3.31 | 6.96 | 4.24 | 4.94  | 7.21  | 5.94  |
| 214765_s_at  | NAAA             | N-acylethanolamine acid amidase                                                   | 0.831931 | 9.13 | 9.18 | 7.38  | 6.58 | 8.23 | 7.31 | 7.66 | 8.46  | 6.97  | 6.17  |
| 225794_s_at  | C22orf32         | chromosome 22 open reading frame 32                                               | 0.832134 | 5.66 | 5.95 | 7.16  | 5.66 | 6.55 | 8.15 | 8.52 | 7.7   | 6.27  | 5.67  |
| 224716_at    | SLC35B2          | solute carrier family 35, member B2                                               | 0.832383 | 4.93 | 7.85 | 5.12  | 4.78 | 6.75 | 4.82 | 5.15 | 7.07  | 4.3   | 6.09  |
| 1561286_a_at | DIP2A            | DIP2 disco-interacting protein 2 homolog A (Drosophila)                           | 0.832756 | 3.53 | 3.75 | 5.58  | 7.24 | 5.99 | 7.04 | 5.14 | 7.35  | 5.34  | 6.67  |
| 220784_s_at  | UTS2             | urotensin 2                                                                       | 0.832835 | 3.16 | 3.37 | 3.56  | 3.24 | 6.95 | 6.69 | 6.47 | 7.86  | 5.69  | 7.21  |
| 213822_s_at  | UBE3B            | ubiquitin protein ligase E3B                                                      | 0.832835 | 6.56 | 5.56 | 5.81  | 6.19 | 5.53 | 9.63 | 6.42 | 5.78  | 5.65  | 5.75  |
| 207216_at    | TNFSF8           | tumor necrosis factor (ligand) superfamily, member 8                              | 0.832839 | 7.27 | 6.52 | 4.36  | 6.76 | 7.21 | 4.75 | 5.57 | 5.38  | 5.23  | 3.17  |
| 228919_at    | ---              | ---                                                                               | 0.832839 | 8.73 | 8.5  | 6.54  | 7.9  | 5.19 | 5.11 | 5.13 | 4.99  | 5.24  | 5.19  |
| 227144_at    | C22orf9          | chromosome 22 open reading frame 9                                                | 0.832839 | 6.7  | 7.17 | 5.57  | 5.78 | 6.25 | 7.61 | 7.53 | 7.18  | 5.44  | 4.39  |
| 1553678_a_at | ITGB1            | integrin, beta 1 (fibronectin receptor, beta polypeptide, antigen CD29 includes)  | 0.832865 | 6.33 | 6.15 | 4.26  | 6.28 | 7.12 | 9    | 8.58 | 7.91  | 6.93  | 5.71  |
| 241147_at    | ---              | ---                                                                               | 0.832895 | 4.24 | 5.74 | 4.14  | 3.96 | 4.27 | 6.35 | 5.47 | 3.12  | 7.69  | 6.87  |
| 201421_s_at  | WDR77            | WD repeat domain 77                                                               | 0.833063 | 4.93 | 5.8  | 4.13  | 4.44 | 5.95 | 7.38 | 6.3  | 6.14  | 5.87  | 4.54  |
| 213359_at    | HNRNPD           | Heterogeneous nuclear ribonucleoprotein D (AU-rich element RNA binding protein 1) | 0.83317  | 7.24 | 5.4  | 6.16  | 5.77 | 4.33 | 5.03 | 4.48 | 3.22  | 5.32  | 7.7   |
| 238923_at    | SPOP             | speckle-type POZ protein                                                          | 0.833418 | 5.37 | 5.18 | 7.38  | 7.97 | 6.94 | 6.45 | 4.27 | 4.46  | 7.53  | 4.15  |
| 218239_s_at  | GTPBP4           | GTP binding protein 4                                                             | 0.833426 | 4.89 | 6.88 | 4.6   | 3.94 | 5.27 | 3.61 | 6.96 | 7.01  | 5.3   | 4.97  |
| 205844_at    | VNN1             | vanin 1                                                                           | 0.833426 | 6.14 | 5.67 | 8.42  | 8.75 | 8.66 | 7.68 | 8.65 | 8.69  | 5.48  | 5.35  |
| 210949_s_at  | EIF3C /// EIF3CL | eukaryotic translation initiation factor 3, subunit C /// eukaryotic translation  | 0.833426 | 5.01 | 4.4  | 5.41  | 5.61 | 5.82 | 7.71 | 7.01 | 7.26  | 5.4   | 3.57  |
| 1560679_at   | LOC151438        | hypothetical protein LOC151438                                                    | 0.833612 | 8.61 | 8.3  | 7.78  | 8.93 | 7.14 | 5.91 | 6.96 | 7.29  | 6.72  | 6.24  |
| 217207_s_at  | BTNL3            | butyrophilin-like 3                                                               | 0.833842 | 9.35 | 9.06 | 9.88  | 9.84 | 4.7  | 5.46 | 5.15 | 5.35  | 8.73  | 9.44  |
| 235013_at    | SLC31A1          | solute carrier family 31 (copper transporters), member 1                          | 0.834398 | 4.87 | 8.07 | 5.84  | 5.92 | 6.09 | 4.8  | 7.67 | 5.66  | 6.47  | 4.81  |
| 217624_at    | PDAP1            | PDGFA associated protein 1                                                        | 0.834509 | 8.15 | 8.44 | 9.8   | 9.26 | 6.85 | 7.36 | 5.86 | 7.59  | 8.37  | 8.75  |
| 221087_s_at  | APOL3            | apolipoprotein L, 3                                                               | 0.8351   | 6.67 | 6.69 | 4.06  | 6.27 | 7.76 | 8.22 | 7.98 | 8.22  | 6.23  | 7.82  |
| 219799_s_at  | DHRS9            | dehydrogenase/reductase (SDR family) member 9                                     | 0.835592 | 7.97 | 8.96 | 8.69  | 8.62 | 9.88 | 7.33 | 8.9  | 10.06 | 10.59 | 10.01 |
| 218403_at    | TRIAP1           | TP53 regulated inhibitor of apoptosis 1                                           | 0.835775 | 5.28 | 5.61 | 6.16  | 5.59 | 6.95 | 7.77 | 8.23 | 7.83  | 7.48  | 6.36  |
| 227517_s_at  | GAS5             | growth arrest-specific 5 (non-protein coding)                                     | 0.83597  | 7.14 | 5    | 6.11  | 5.39 | 6.35 | 4.49 | 7.22 | 4.86  | 7.26  | 8.84  |
| 205449_at    | SAC3D1           | SAC3 domain containing 1                                                          | 0.836229 | 4    | 4.15 | 4.12  | 4.11 | 6.64 | 7.49 | 6.7  | 7.96  | 7.1   | 7.36  |
| 227312_at    | SNTB2            | syntrophin, beta 2 (dystrophin-associated protein A1, 59kDa, basic component 2)   | 0.836538 | 5.28 | 5.58 | 5.29  | 6.1  | 6.31 | 8.33 | 5.81 | 3.8   | 5.54  | 5.11  |
| 209092_s_at  | GLOD4            | glyoxalase domain containing 4                                                    | 0.836538 | 5.35 | 6.51 | 3.93  | 5.02 | 6.14 | 6.83 | 6.94 | 6.84  | 5.59  | 4.53  |
| 1555435_at   | AFF4             | AF4/FMR2 family, member 4                                                         | 0.836538 | 7.85 | 5.48 | 8.06  | 7.73 | 4.73 | 6.1  | 6.49 | 6.21  | 7.74  | 8.1   |
| 205133_s_at  | HSPE1            | heat shock 10kDa protein 1 (chaperonin 10)                                        | 0.836725 | 7.02 | 7.74 | 6.32  | 6.56 | 8.65 | 9.48 | 9.73 | 9.12  | 7.83  | 8.07  |
| 1559227_s_at | VHL              | von Hippel-Lindau tumor suppressor                                                | 0.83714  | 6.29 | 4.49 | 3.24  | 6.09 | 6.63 | 5.32 | 3.11 | 3.2   | 6.54  | 3.24  |



|              |             |                                                                          |          |       |       |       |       |       |       |       |       |       |       |
|--------------|-------------|--------------------------------------------------------------------------|----------|-------|-------|-------|-------|-------|-------|-------|-------|-------|-------|
| 205110_s_at  | FGF13       | fibroblast growth factor 13                                              | 0.837178 | 5.39  | 5.26  | 7.78  | 7.87  | 4.93  | 4.17  | 5.26  | 6.71  | 7.85  | 8.85  |
| 227250_at    | KREMEN1     | kringle containing transmembrane protein 1                               | 0.837178 | 9.5   | 9.33  | 9.47  | 9.92  | 8.4   | 6.78  | 8.96  | 8.78  | 6.65  | 7.32  |
| 201519_at    | TOMM70A     | translocase of outer mitochondrial membrane 70 homolog A (S. cerevisiae) | 0.837595 | 5.28  | 6.09  | 3.14  | 4.43  | 5.68  | 5.73  | 6.83  | 6.2   | 6.11  | 6.87  |
| 204618_s_at  | GABPB1      | GA binding protein transcription factor, beta subunit 1                  | 0.838077 | 8.32  | 8.3   | 4.52  | 7.21  | 8.39  | 6.44  | 7.8   | 5.91  | 6.95  | 9.25  |
| 203818_s_at  | SF3A3       | splicing factor 3a, subunit 3, 60kDa                                     | 0.838227 | 5.93  | 6.5   | 3.66  | 6.37  | 5.32  | 5.34  | 6.99  | 6.98  | 6.64  | 6.98  |
| 1552348_at   | PRSS33      | protease, serine, 33                                                     | 0.838371 | 9.45  | 11.06 | 10.66 | 9.27  | 11.9  | 12.45 | 10.5  | 11.65 | 10.67 | 11.06 |
| 221841_s_at  | KLF4        | Kruppel-like factor 4 (gut)                                              | 0.838381 | 7.19  | 3.97  | 7.6   | 7.77  | 6.21  | 5.59  | 8.23  | 6.32  | 6.7   | 4.44  |
| 215783_s_at  | ALPL        | alkaline phosphatase, liver/bone/kidney                                  | 0.838644 | 10.13 | 10.08 | 11.4  | 11.24 | 10.33 | 9.76  | 11.25 | 11.64 | 9.3   | 8.2   |
| 228983_at    | ---         | ---                                                                      | 0.838701 | 6.84  | 5.4   | 4.75  | 4.75  | 5.13  | 3.89  | 4.81  | 4.75  | 6.55  | 8.09  |
| 1558214_s_at | CTNNA1      | catenin (cadherin-associated protein), alpha 1, 102kDa                   | 0.838807 | 8.72  | 7.71  | 3.48  | 7.36  | 8.97  | 6.17  | 5.94  | 5.69  | 6.11  | 6.25  |
| 214962_s_at  | NUP160      | nucleoporin 160kDa                                                       | 0.838807 | 6.95  | 4.3   | 3.84  | 6.05  | 6.91  | 4.65  | 5.25  | 6.21  | 5.28  | 7.35  |
| 219622_at    | RAB20       | RAB20, member RAS oncogene family                                        | 0.838989 | 8.11  | 7.67  | 9.49  | 9.29  | 6.65  | 6.93  | 8.77  | 8.77  | 6.08  | 4.25  |
| 204655_at    | CCL5        | chemokine (C-C motif) ligand 5                                           | 0.838989 | 7.45  | 5.37  | 7.41  | 8.08  | 8.01  | 10.5  | 10.09 | 9.64  | 7.52  | 8.29  |
| 212428_at    | KIAA0368    | KIAA0368                                                                 | 0.838989 | 6.5   | 5.98  | 4.32  | 5.97  | 6.15  | 4.01  | 5.53  | 6.46  | 5.47  | 3.69  |
| 218654_s_at  | MRPS33      | mitochondrial ribosomal protein S33                                      | 0.839017 | 4.24  | 4.57  | 3.6   | 6.49  | 4.5   | 5.5   | 5.8   | 6.1   | 6.04  | 3.55  |
| 209961_s_at  | HGF         | hepatocyte growth factor (hepapoietin A; scatter factor)                 | 0.839017 | 5.75  | 6.94  | 5.45  | 6.19  | 9.26  | 7     | 6.51  | 5.73  | 5.9   | 5.84  |
| 201560_at    | CLIC4       | chloride intracellular channel 4                                         | 0.839669 | 6.21  | 5.49  | 5.97  | 6.16  | 6.86  | 8.57  | 7.57  | 7.09  | 7.59  | 8.35  |
| 235370_at    | KREMEN1     | kringle containing transmembrane protein 1                               | 0.839669 | 8     | 7.81  | 8.31  | 8.85  | 7.41  | 6.61  | 7.65  | 7.27  | 5.88  | 5.52  |
| 238642_at    | ANKRD13D    | ankyrin repeat domain 13 family, member D                                | 0.840399 | 7.53  | 7.68  | 8.11  | 8.1   | 7.42  | 6.58  | 7.49  | 6.22  | 8.38  | 9.95  |
| 210892_s_at  | GTF2I       | general transcription factor II, i                                       | 0.840793 | 7.13  | 8.43  | 6.23  | 6.51  | 8.51  | 8.93  | 8.58  | 9.01  | 8.01  | 7.12  |
| 1553694_a_at | PIK3C2A     | phosphoinositide-3-kinase, class 2, alpha polypeptide                    | 0.840793 | 8.33  | 8.15  | 5.61  | 6.49  | 7.8   | 5.52  | 6.39  | 6.2   | 6.99  | 7.42  |
| 220421_at    | BTNL8       | butyrophilin-like 8                                                      | 0.841113 | 9.5   | 9.74  | 3.86  | 3.61  | 10.52 | 9.52  | 9.3   | 9.56  | 3.32  | 3.36  |
| 223393_s_at  | TSHZ3       | teashirt zinc finger homeobox 3                                          | 0.841213 | 7.64  | 8.05  | 5.86  | 6.03  | 6.67  | 5.47  | 7.11  | 7.69  | 6.35  | 3.75  |
| 213618_at    | ARAP2       | ArfGAP with RhoGAP domain, ankyrin repeat and PH domain 2                | 0.841215 | 6.32  | 7.34  | 2.94  | 6.77  | 7.42  | 7.23  | 6.98  | 6.55  | 6.54  | 6.32  |
| 214457_at    | HOXA2       | homeobox A2                                                              | 0.841215 | 6.58  | 6.5   | 5.15  | 6.71  | 6.93  | 5.92  | 4.09  | 4.2   | 3.97  | 3.75  |
| 214310_s_at  | ZFPL1       | zinc finger protein-like 1                                               | 0.841215 | 5.39  | 4.76  | 7.84  | 5.21  | 5.19  | 6.46  | 4.95  | 5.24  | 5.89  | 7.15  |
| 1561058_at   | ---         | ---                                                                      | 0.841357 | 6.17  | 5.55  | 3.99  | 4.64  | 3.74  | 4.12  | 4.47  | 5.08  | 6.31  | 7.35  |
| 200988_s_at  | PSME3       | proteasome (prosome, macropain) activator subunit 3 (PA28 gamma; Ki)     | 0.841357 | 7.11  | 7.13  | 4.09  | 5.88  | 5.02  | 4.77  | 6.8   | 5.32  | 7.04  | 6.1   |
| 209425_at    | C1QTNF3     | C1q and tumor necrosis factor related protein 3                          | 0.841431 | 3.15  | 4.47  | 3.43  | 4.66  | 5.98  | 3.43  | 6.34  | 7.11  | 6.92  | 3.35  |
| 1555275_a_at | KLHL6       | kelch-like 6 (Drosophila)                                                | 0.841431 | 4.27  | 6.61  | 4.94  | 5.28  | 5.17  | 6.12  | 5.36  | 6.47  | 3.74  | 2.02  |
| 1552940_at   | TEDDM1      | transmembrane epididymal protein 1                                       | 0.841565 | 6.77  | 7.92  | 8.27  | 6.91  | 5.86  | 4.45  | 8.28  | 6.39  | 8.05  | 7.99  |
| 204972_at    | OAS2        | 2'-5'-oligoadenylate synthetase 2, 69/71kDa                              | 0.841725 | 4.04  | 4.56  | 6.72  | 7.29  | 7.34  | 7.75  | 6.21  | 3.67  | 7.59  | 6.66  |
| 221570_s_at  | METTLL5     | methyltransferase like 5                                                 | 0.842008 | 6.24  | 6.79  | 4.14  | 6.48  | 6.84  | 7.02  | 6.99  | 7.77  | 6.11  | 7.94  |
| 202336_s_at  | PAM         | peptidylglycine alpha-amidating monooxygenase                            | 0.842221 | 6.74  | 5.72  | 6.37  | 7.53  | 7.35  | 6.99  | 4.83  | 3.17  | 4.08  | 4.18  |
| 202760_s_at  | PALM2-AKAP2 | PALM2-AKAP2 readthrough transcript                                       | 0.842608 | 6.19  | 8.07  | 3.92  | 4.3   | 6.25  | 7.24  | 7.65  | 5.3   | 6.41  | 4.71  |
| 214096_s_at  | SHMT2       | serine hydroxymethyltransferase 2 (mitochondrial)                        | 0.842804 | 6.83  | 7.04  | 5.36  | 6.62  | 8.21  | 9.25  | 8.24  | 8.48  | 6.96  | 5.39  |
| 235019_at    | CPM         | carboxypeptidase M                                                       | 0.843023 | 3.49  | 2.61  | 2.34  | 3.72  | 5.56  | 5.1   | 6.01  | 6.39  | 6.42  | 3.4   |
| 240673_at    | ---         | ---                                                                      | 0.843023 | 6.61  | 7.35  | 4.17  | 5.05  | 7.24  | 6.06  | 7.06  | 6.65  | 6.86  | 6.26  |
| 214359_s_at  | HSP90AB1    | heat shock protein 90kDa alpha (cytosolic), class B member 1             | 0.843236 | 5.4   | 6.48  | 5.44  | 6.38  | 6.6   | 7.98  | 6.04  | 7.23  | 5.79  | 3.73  |

|              |               |                                                             |          |      |      |      |      |       |       |       |       |       |       |
|--------------|---------------|-------------------------------------------------------------|----------|------|------|------|------|-------|-------|-------|-------|-------|-------|
| 209667_at    | CES2          | carboxylesterase 2 (intestine, liver)                       | 0.843247 | 7.96 | 7.43 | 5.02 | 7.42 | 8.21  | 6.76  | 5.92  | 6.31  | 8.35  | 8.23  |
| 219158_s_at  | NARG1         | NMDA receptor regulated 1                                   | 0.843247 | 6.54 | 4.75 | 4.06 | 3.97 | 6.31  | 6.25  | 7.05  | 5.43  | 6.31  | 4.7   |
| 204409_s_at  | EIF1AY        | eukaryotic translation initiation factor 1A, Y-linked       | 0.843337 | 2.78 | 2.92 | 3.22 | 3.19 | 11.64 | 11.46 | 11.64 | 11.73 | 11.25 | 11.5  |
| 214901_at    | ZNF8          | zinc finger protein 8                                       | 0.843337 | 5.4  | 8.41 | 7.7  | 5.31 | 5.22  | 5.11  | 4.31  | 5.74  | 7.01  | 6.66  |
| 238024_at    | ---           | ---                                                         | 0.843607 | 6.51 | 7.04 | 5.34 | 6.59 | 6.28  | 4.75  | 4.55  | 4.51  | 6.72  | 7.47  |
| 1570597_at   | ---           | ---                                                         | 0.843607 | 6.48 | 5.46 | 8.89 | 6.29 | 5.51  | 5.69  | 5.75  | 5.94  | 7.73  | 6.53  |
| 220755_s_at  | C6orf48       | chromosome 6 open reading frame 48                          | 0.843723 | 7.07 | 7.5  | 6.31 | 7.41 | 8.41  | 9.31  | 9.52  | 9.04  | 7.3   | 8.2   |
| 213915_at    | NKG7          | natural killer cell group 7 sequence                        | 0.844092 | 6.95 | 6.76 | 5.74 | 7.94 | 8.42  | 8.74  | 9.43  | 8.93  | 7.59  | 8.81  |
| 234299_s_at  | NIN           | ninein (GSK3B interacting protein)                          | 0.844256 | 8.43 | 7.91 | 5.67 | 8.91 | 7.99  | 8.38  | 8.17  | 6.61  | 8.12  | 6.06  |
| 205988_at    | CD84          | CD84 molecule                                               | 0.844469 | 4.92 | 5.27 | 3.71 | 6.07 | 6.79  | 6.95  | 4.97  | 5.42  | 6.54  | 4.96  |
| 1552349_a_at | PRSS33        | protease, serine, 33                                        | 0.844544 | 7.16 | 8.48 | 9.15 | 7.09 | 9.57  | 10.1  | 7.93  | 8.75  | 8.54  | 9.83  |
| 225056_at    | SIPA1L2       | signal-induced proliferation-associated 1 like 2            | 0.844643 | 8.18 | 8.65 | 6.94 | 8.67 | 7.49  | 3.97  | 8.2   | 7.22  | 7.95  | 5.47  |
| 201909_at    | RPS4Y1        | ribosomal protein S4, Y-linked 1                            | 0.844708 | 5.2  | 5.9  | 5.75 | 5.09 | 9.75  | 10.1  | 10.58 | 10.13 | 9.76  | 10.58 |
| 201108_s_at  | THBS1         | thrombospondin 1                                            | 0.844708 | 4.41 | 5.57 | 4.82 | 6.26 | 6.61  | 8.71  | 7.49  | 7.5   | 6.7   | 7.36  |
| 225095_at    | SPTLC2        | Serine palmitoyltransferase, long chain base subunit 2      | 0.844708 | 6.11 | 7.95 | 4.8  | 6.53 | 7.78  | 7.89  | 7.42  | 7.41  | 6.98  | 4.59  |
| 210029_at    | IDO1          | indoleamine 2,3-dioxygenase 1                               | 0.844708 | 5.86 | 5.79 | 6.32 | 6.47 | 8.73  | 6.48  | 5.02  | 7.02  | 7.1   | 7.28  |
| 1558000_at   | ARID5B        | AT rich interactive domain 5B (MRF1-like)                   | 0.844708 | 4.43 | 6.78 | 4.69 | 5.53 | 6.32  | 4.24  | 7.04  | 4.64  | 4.43  | 5.03  |
|              |               | immunoglobulin kappa locus /// immunoglobulin kappa         |          |      |      |      |      |       |       |       |       |       |       |
| 221671_x_at  | IGK@ /// IGKC | constant                                                    | 0.844708 | 5.61 | 8.77 | 6.32 | 5.94 | 7.78  | 8.03  | 9.06  | 8.07  | 6.7   | 6.56  |
| 1558859_at   | LOC222159     | hypothetical protein LOC222159                              | 0.844708 | 6.39 | 7.67 | 6.27 | 6.41 | 4.69  | 5.19  | 7.41  | 7.69  | 6.56  | 7.64  |
| 212922_s_at  | SMYD2         | SET and MYND domain containing 2                            | 0.845002 | 3.83 | 4.73 | 4.46 | 4.39 | 5.68  | 7.17  | 7.13  | 6.99  | 5.99  | 4.36  |
| 209715_at    | CBX5          | chromobox homolog 5 (HP1 alpha homolog, Drosophila)         | 0.845002 | 5.87 | 6.06 | 4.46 | 6.41 | 7.16  | 6.49  | 7.15  | 8.24  | 6.62  | 7.33  |
| 238409_x_at  | OXR1          | oxidation resistance 1                                      | 0.845006 | 5.97 | 6.84 | 3.92 | 4.53 | 5.95  | 6.52  | 6.18  | 4.59  | 6.26  | 3.54  |
| 237210_at    | NFRKB         | nuclear factor related to kappaB binding protein            | 0.845121 | 5.86 | 7.54 | 7.63 | 6.84 | 6.78  | 6.78  | 6.07  | 3.91  | 6.19  | 8.86  |
| 201139_s_at  | SSB           | Sjogren syndrome antigen B (autoantigen La)                 | 0.845248 | 8.18 | 8.4  | 5.61 | 7.69 | 9.41  | 9.03  | 9.61  | 8.9   | 8.66  | 7.94  |
| 236399_at    | ---           | ---                                                         | 0.845317 | 7.59 | 6.07 | 9.21 | 6.61 | 6.02  | 6.17  | 6.13  | 5.4   | 5.46  | 8.23  |
| 213256_at    |               | 3-Mar membrane-associated ring finger (C3HC4) 3             | 0.845378 | 5.35 | 5.44 | 6.12 | 7.33 | 6.58  | 4.51  | 4.55  | 4.91  | 5.83  | 4.18  |
| 205107_s_at  | EFNA4         | ephrin-A4                                                   | 0.845492 | 6.68 | 6.31 | 8.79 | 6.07 | 6.89  | 6.53  | 7.51  | 9.43  | 5.23  | 7.23  |
| 224253_at    | EXOC5         | exocyst complex component 5                                 | 0.845509 | 6.72 | 6.82 | 4.08 | 6.37 | 7.86  | 6.63  | 7.8   | 7.91  | 6.92  | 6.76  |
| 210232_at    | CDC42         | cell division cycle 42 (GTP binding protein, 25kDa)         | 0.845514 | 6.44 | 6.31 | 7.46 | 7.42 | 5.32  | 3.86  | 6.49  | 7.5   | 6.79  | 7.02  |
| 201157_s_at  | NMT1          | N-myristoyltransferase 1                                    | 0.84581  | 6.14 | 5.44 | 6.19 | 5.91 | 5.24  | 8.1   | 5.57  | 4.99  | 6.88  | 4.49  |
| 242431_at    | ---           | ---                                                         | 0.845999 | 7.68 | 6.12 | 7.64 | 8.83 | 4.89  | 6.77  | 6.22  | 6.92  | 6.55  | 6.71  |
| 224588_at    | XIST          | X (inactive)-specific transcript (non-protein coding)       | 0.846301 | 6.75 | 7.86 | 8.43 | 7.44 | 3.47  | 3.45  | 3.42  | 3.34  | 3.11  | 3.83  |
| 219279_at    | DOCK10        | dedicator of cytokinesis 10                                 | 0.846837 | 3.34 | 6.13 | 2.67 | 6.11 | 6.08  | 7.07  | 8.24  | 7.01  | 4.87  | 2.89  |
|              |               | Leo1, Paf1/RNA polymerase II complex component, homolog     |          |      |      |      |      |       |       |       |       |       |       |
| 235096_at    | LEO1          | (S. cerevisiae)                                             | 0.846837 | 6.58 | 6.95 | 5.36 | 4.51 | 7.11  | 7.83  | 6.82  | 9.32  | 6.84  | 4.26  |
| 230256_at    | C1orf104      | Chromosome 1 open reading frame 104                         | 0.846837 | 5.01 | 6.82 | 3.62 | 3.45 | 4.74  | 3.61  | 5.33  | 4.46  | 6.39  | 7.3   |
| 241683_at    | HECTD1        | HECT domain containing 1                                    | 0.846837 | 6.96 | 7.77 | 5.01 | 6.73 | 7.36  | 7.45  | 5.61  | 7.45  | 6.03  | 4.17  |
| 212725_s_at  | TUG1          | taurine upregulated 1 (non-protein coding)                  | 0.846837 | 6.98 | 6.62 | 7.7  | 7.68 | 7.24  | 7.3   | 6.99  | 4.49  | 7.22  | 8.49  |
| 1562388_at   | LOC285819     | hypothetical protein LOC285819                              | 0.847054 | 7.62 | 8.36 | 4.83 | 6.92 | 7.15  | 5.99  | 6.55  | 6.14  | 6.19  | 5.72  |
| 55065_at     | MARK4         | MAP/microtubule affinity-regulating kinase 4                | 0.847094 | 6.72 | 5.07 | 9.39 | 6.51 | 6.56  | 5.1   | 5.47  | 4.8   | 6.07  | 7.29  |
|              |               | N-acetylglucosamine-1-phosphate transferase, alpha and beta |          |      |      |      |      |       |       |       |       |       |       |
| 212959_s_at  | GNPTAB        | subunits                                                    | 0.847224 | 4.08 | 5.82 | 3.27 | 4.75 | 6.24  | 5.8   | 6.57  | 5.16  | 6.56  | 5.2   |

|              |                      |                                                                                  |          |      |      |      |      |       |       |      |      |       |       |
|--------------|----------------------|----------------------------------------------------------------------------------|----------|------|------|------|------|-------|-------|------|------|-------|-------|
| 219763_at    | DENND1A              | DENN/MADD domain containing 1A                                                   | 0.84741  | 5.68 | 4.81 | 8.59 | 6.71 | 5.39  | 4.6   | 5.35 | 5.7  | 5.9   | 6.01  |
| 204410_at    | EIF1AY               | eukaryotic translation initiation factor 1A, Y-linked                            | 0.847535 | 3.18 | 3.98 | 2.94 | 2.76 | 8.52  | 7.36  | 8    | 8.01 | 7     | 7.38  |
| 206055_s_at  | SNRPA1               | small nuclear ribonucleoprotein polypeptide A'                                   | 0.847578 | 5.83 | 6.55 | 2.69 | 4.23 | 6.62  | 7.1   | 7.84 | 7.14 | 6.37  | 4.75  |
| 229213_at    | DIRC2                | disrupted in renal carcinoma 2                                                   | 0.847905 | 6.31 | 5.19 | 7.64 | 7.18 | 6.91  | 6.76  | 7.12 | 4.98 | 6.42  | 9.12  |
| 200691_s_at  | HSPA9                | heat shock 70kDa protein 9 (mortalin)                                            | 0.848208 | 6.81 | 6.31 | 4.33 | 6.38 | 6.44  | 5.72  | 7.28 | 7.05 | 5.95  | 4.01  |
| 221923_s_at  | NPM1                 | nucleophosmin (nucleolar phosphoprotein B23, numatrin)                           | 0.848565 | 6.26 | 6.05 | 4.39 | 5.11 | 7.01  | 7.83  | 8.08 | 7.69 | 5.79  | 6.14  |
| 202284_s_at  | CDKN1A               | cyclin-dependent kinase inhibitor 1A (p21, Cip1)                                 | 0.848619 | 6.81 | 6.22 | 6.25 | 7.22 | 7.1   | 9.43  | 8.35 | 9.2  | 6.55  | 4.6   |
| 47571_at     | ZNF236               | zinc finger protein 236                                                          | 0.848619 | 3.98 | 5.21 | 6.22 | 5.61 | 4.03  | 7.77  | 4.49 | 4.38 | 7.21  | 4     |
| 235789_at    | KDM4B                | lysine (K)-specific demethylase 4B                                               | 0.848619 | 7.62 | 7.03 | 4.76 | 7.06 | 4.91  | 4.98  | 6.04 | 4.38 | 7.42  | 6.72  |
| 203335_at    | PHYH                 | phytanoyl-CoA 2-hydroxylase                                                      | 0.848656 | 4.25 | 3.36 | 2.96 | 3.74 | 6.52  | 5.91  | 6.3  | 7.35 | 3.71  | 3.66  |
| 202847_at    | PCK2                 | phosphoenolpyruvate carboxykinase 2 (mitochondrial)                              | 0.84869  | 6.43 | 6.59 | 6.65 | 6.64 | 6.22  | 8.82  | 7.47 | 6.54 | 6     | 4.89  |
| 201559_s_at  | CLIC4                | chloride intracellular channel 4                                                 | 0.849442 | 4.86 | 5.62 | 3.53 | 5.57 | 4.59  | 7.33  | 6.92 | 6.36 | 5.9   | 4.08  |
| 211623_s_at  | FBL                  | fibrillarin                                                                      | 0.849442 | 6.63 | 7.77 | 5.35 | 6.41 | 8.34  | 8.69  | 9.27 | 8.78 | 8.06  | 7.3   |
| 235516_at    | SEPSECS              | Sep (O-phosphoserine) tRNA:Sec (selenocysteine) tRNA synthase                    | 0.849442 | 4.81 | 7.18 | 4.52 | 4.08 | 7.63  | 6.45  | 7.2  | 5.46 | 6.46  | 9.23  |
| 1557910_at   | HSP90AB1             | heat shock protein 90kDa alpha (cytosolic), class B member 1                     | 0.849671 | 7.88 | 7.39 | 5.24 | 7.07 | 6.74  | 7.58  | 8.1  | 8.36 | 6.82  | 5.36  |
| 239654_at    | CHD9                 | Chromodomain helicase DNA binding protein 9                                      | 0.850155 | 5.82 | 7.81 | 3.97 | 5.44 | 5.98  | 7.13  | 8.96 | 3.6  | 6.58  | 6.24  |
| 209875_s_at  | SPP1                 | secreted phosphoprotein 1                                                        | 0.850409 | 6.51 | 6.79 | 4.06 | 4.52 | 7.18  | 6.45  | 3.92 | 3.95 | 6.2   | 5.97  |
| 1570243_at   | LOC440731            | Similar to hCG1817424                                                            | 0.850595 | 7.52 | 6.34 | 4.5  | 5.55 | 6.72  | 7.01  | 5.35 | 4.18 | 4.23  | 4.53  |
| 1556357_s_at | ERICH1               | glutamate-rich 1                                                                 | 0.850655 | 4.93 | 3.35 | 6.11 | 7.06 | 6.46  | 4.67  | 5.37 | 8.21 | 6.43  | 7.96  |
| 217630_at    | ANGEL2               | angel homolog 2 (Drosophila)                                                     | 0.85079  | 4.51 | 7.05 | 6.91 | 5.54 | 6     | 5.5   | 3.74 | 6.99 | 7.05  | 6.61  |
| 225583_at    | UXS1                 | UDP-glucuronate decarboxylase 1                                                  | 0.851    | 5.7  | 5.43 | 3.67 | 4.74 | 7.43  | 7.38  | 7.31 | 7.61 | 5.68  | 6.41  |
| 235922_at    | ---                  | ---                                                                              | 0.851    | 7.6  | 3.85 | 6.8  | 5.92 | 4.87  | 7.6   | 6.59 | 5.98 | 7.94  | 5.57  |
| 1556035_s_at | ZNF207               | zinc finger protein 207                                                          | 0.851118 | 6.82 | 4    | 4.38 | 6.5  | 5.06  | 3.93  | 5.24 | 4.98 | 6.35  | 6.94  |
| 228822_s_at  | USP16                | ubiquitin specific peptidase 16                                                  | 0.851192 | 6.25 | 6.38 | 2.88 | 6.38 | 6.36  | 5.49  | 6.36 | 4.78 | 6.73  | 5.39  |
| 207902_at    | IL5RA                | interleukin 5 receptor, alpha                                                    | 0.851462 | 5.61 | 5.93 | 8.64 | 6.23 | 7.86  | 8.42  | 5.65 | 6.67 | 6.36  | 6.16  |
| 213797_at    | RSAD2                | radical S-adenosyl methionine domain containing 2                                | 0.851518 | 7.67 | 8.7  | 9.34 | 9.84 | 10.49 | 10.62 | 7.35 | 7.77 | 10.13 | 10.22 |
| 205511_at    | FLJ10038             | hypothetical protein FLJ10038                                                    | 0.851518 | 4.85 | 4.56 | 7.83 | 6.91 | 5.29  | 5.36  | 5.27 | 4.94 | 6.32  | 5.63  |
| 216591_s_at  | hCG_1776980 /// SDHC | hCG1776980 /// succinate dehydrogenase complex, subunit C, integral membrane pro | 0.851643 | 7.24 | 6.27 | 8.15 | 7.96 | 7.79  | 9.58  | 7.78 | 9.15 | 7.54  | 6.74  |
| 202742_s_at  | PRKACB               | protein kinase, cAMP-dependent, catalytic, beta                                  | 0.852112 | 4.89 | 5.66 | 3.38 | 4.87 | 6.31  | 8.21  | 6.93 | 6.38 | 5.55  | 5.01  |
| 1555392_at   | LOC100128868         | testin-related protein TRG                                                       | 0.852112 | 8.15 | 8.82 | 9.58 | 8.29 | 6.35  | 5.16  | 6.86 | 9.49 | 7.41  | 9.25  |
| 240103_at    | ---                  | ---                                                                              | 0.852288 | 7.38 | 7.69 | 5.42 | 8.03 | 7.73  | 7.47  | 5.17 | 4.18 | 6.45  | 7.44  |
| 204894_s_at  | AOC3                 | amine oxidase, copper containing 3 (vascular adhesion protein 1)                 | 0.852425 | 6.36 | 6.95 | 3.16 | 5.8  | 5.4   | 3.78  | 5.96 | 5.33 | 6.02  | 4.26  |
| 209426_s_at  | AMACR /// C1QTNF3    | alpha-methylacyl-CoA racemase /// C1q and tumor necrosis factor related protein  | 0.852529 | 6.78 | 7.44 | 6.87 | 5.92 | 9.06  | 9.11  | 8.09 | 8.61 | 8.28  | 8.58  |
| 203466_at    | MPV17                | MpV17 mitochondrial inner membrane protein                                       | 0.852723 | 5.94 | 4.46 | 4.68 | 4.84 | 7.38  | 6.69  | 7.85 | 5.76 | 5.35  | 6.31  |
| 227220_at    | NFXL1                | nuclear transcription factor, X-box binding-like 1                               | 0.852776 | 6    | 5.69 | 8.53 | 9.35 | 8.95  | 7.96  | 6.96 | 6.53 | 8.85  | 8.39  |
| 200986_at    | SERPING1             | serpin peptidase inhibitor, clade G (C1 inhibitor), member 1                     | 0.852924 | 6.28 | 6.38 | 8.66 | 8.73 | 6.57  | 5.93  | 6    | 6.63 | 6.88  | 6.71  |
| 205654_at    | C4BPA                | complement component 4 binding protein, alpha                                    | 0.852949 | 5.71 | 6.18 | 8.74 | 9.36 | 5.6   | 5.84  | 8.13 | 8.2  | 8.49  | 8.44  |

|              |               |                                                               |          |      |       |      |      |      |      |      |      |      |      |
|--------------|---------------|---------------------------------------------------------------|----------|------|-------|------|------|------|------|------|------|------|------|
| 226431_at    | FAM117B       | family with sequence similarity 117, member B                 | 0.852949 | 5.37 | 6.9   | 3.67 | 4.97 | 6.69 | 5    | 5.98 | 5.84 | 7.49 | 6.45 |
| 39729_at     | PRDX2         | peroxiredoxin 2                                               | 0.852949 | 5.29 | 5.82  | 4.36 | 5.13 | 6.73 | 8.28 | 7.02 | 6.53 | 6.52 | 6.61 |
| 222968_at    | ---           | ---                                                           | 0.852949 | 6.98 | 7.41  | 6.51 | 7.19 | 8.4  | 9.34 | 9.31 | 8.7  | 7.11 | 7.85 |
| 218005_at    | ZNF22         | zinc finger protein 22 (KOX 15)                               | 0.852969 | 5.14 | 5.32  | 4.27 | 3.81 | 5.75 | 6.81 | 6.02 | 7.24 | 5.77 | 4.24 |
| 1569401_at   | CLEC12A       | C-type lectin domain family 12, member A                      | 0.853382 | 2.71 | 3.12  | 4.27 | 2.98 | 7.49 | 6.85 | 5.42 | 6.52 | 6.06 | 4.04 |
| 237590_at    | ---           | ---                                                           | 0.85339  | 3.85 | 4.03  | 5.37 | 6.41 | 4.08 | 7.93 | 6.07 | 7.98 | 5.92 | 3.87 |
| 239690_at    | ---           | ---                                                           | 0.85339  | 7.58 | 7.24  | 4.09 | 4.83 | 5.58 | 5.77 | 4.63 | 5.07 | 6.61 | 5.99 |
| 237510_at    | MYNN          | Myoneurin                                                     | 0.853937 | 6.62 | 3.85  | 8.17 | 6.67 | 5.34 | 7.49 | 4.64 | 4.17 | 7.95 | 5.86 |
| 212089_at    | LMNA          | lamin A/C                                                     | 0.854205 | 6.15 | 5.37  | 6.95 | 6.28 | 6.24 | 8.99 | 7.71 | 7.8  | 7.43 | 6.19 |
|              |               | egf-like module containing, mucin-like, hormone receptor-like |          |      |       |      |      |      |      |      |      |      |      |
| 207111_at    | EMR1          | 1                                                             | 0.854252 | 6.33 | 7.03  | 5.19 | 7.29 | 8.67 | 9.73 | 7.98 | 8.17 | 8.36 | 8.48 |
| 240017_at    | ASPRV1        | Aspartic peptidase, retroviral-like 1                         | 0.854272 | 7.31 | 10.89 | 6.39 | 7.47 | 7.28 | 5.43 | 4.29 | 4.17 | 6.52 | 5.23 |
| 239085_at    | JDP2          | Jun dimerization protein 2                                    | 0.854435 | 7.54 | 7.59  | 5.05 | 6.58 | 5.94 | 4.52 | 6.08 | 6.22 | 7.33 | 5.94 |
| 1554794_a_at | UBE3C         | ubiquitin protein ligase E3C                                  | 0.854762 | 5.34 | 6     | 6.05 | 4.98 | 5.28 | 5.52 | 4.76 | 3.62 | 6.44 | 3.23 |
| 239957_at    | ---           | ---                                                           | 0.85504  | 6.28 | 6.8   | 3.93 | 5.41 | 6.17 | 3.96 | 4.16 | 4.73 | 6.27 | 7.82 |
| 227784_s_at  | COG1          | component of oligomeric golgi complex 1                       | 0.855158 | 5.92 | 5.05  | 5.27 | 5.93 | 5.58 | 5.94 | 6.6  | 6.26 | 6.68 | 8.94 |
| 230542_at    | ZNF597        | zinc finger protein 597                                       | 0.855182 | 6.33 | 5.97  | 4.25 | 5.34 | 6.22 | 4.38 | 5.98 | 7.26 | 7.08 | 4.81 |
|              |               | Smith-Magenis syndrome chromosome region, candidate 7-        |          |      |       |      |      |      |      |      |      |      |      |
|              |               | like                                                          |          |      |       |      |      |      |      |      |      |      |      |
| 221516_s_at  | SMCR7L        |                                                               | 0.855182 | 5.75 | 6.43  | 5.97 | 3.85 | 4.73 | 7.99 | 5.89 | 6.51 | 5.81 | 5.29 |
| 238064_at    | ---           | ---                                                           | 0.855264 | 7.32 | 6.2   | 5.38 | 6.61 | 5.89 | 8.68 | 7.39 | 6.19 | 8.24 | 7.87 |
| 226146_at    | ---           | ---                                                           | 0.855264 | 6.81 | 7.37  | 5.1  | 5.86 | 7.38 | 7.03 | 7.21 | 7.21 | 6.93 | 4.29 |
| 230403_at    | ---           | ---                                                           | 0.855264 | 5.89 | 5.85  | 4.1  | 5.1  | 6.36 | 7.04 | 6.01 | 7.13 | 6.65 | 8.15 |
| 228927_at    | ZNF397        | zinc finger protein 397                                       | 0.855272 | 6.26 | 7.23  | 7.04 | 5.26 | 5.3  | 4.17 | 5.09 | 4.6  | 6.16 | 7.01 |
|              |               | membrane protein, palmitoylated 7 (MAGUK p55 subfamily        |          |      |       |      |      |      |      |      |      |      |      |
|              |               | member 7)                                                     |          |      |       |      |      |      |      |      |      |      |      |
| 238778_at    | MPP7          |                                                               | 0.855335 | 4.7  | 4.68  | 4.54 | 5.68 | 7.17 | 6.54 | 7.08 | 6.75 | 6.27 | 6.22 |
| 227075_at    | ELP3          | elongation protein 3 homolog ( <i>S. cerevisiae</i> )         | 0.855348 | 6.41 | 6.7   | 3.96 | 5.27 | 7.21 | 9.03 | 7.2  | 6.7  | 6.48 | 4.16 |
| 238408_at    | ---           | ---                                                           | 0.855348 | 7.26 | 7.22  | 4.79 | 6.02 | 7.26 | 7.8  | 6.79 | 5.78 | 6.69 | 4.25 |
| 219387_at    | CCDC88A       | coiled-coil domain containing 88A                             | 0.85545  | 7.12 | 7.37  | 4.39 | 7.67 | 7.6  | 6.78 | 8.34 | 7.06 | 7.4  | 6.69 |
| 243604_at    | ---           | ---                                                           | 0.855646 | 5.1  | 5.74  | 7.57 | 6.07 | 4.51 | 5.08 | 5.58 | 5.29 | 7.07 | 4.6  |
| 1559754_at   | LTB           | Lymphotoxin beta (TNF superfamily, member 3)                  | 0.855658 | 6.67 | 6.98  | 9.17 | 8.14 | 7.29 | 5.16 | 6.01 | 5.72 | 8.64 | 8.42 |
| 209104_s_at  | NHP2          | NHP2 ribonucleoprotein homolog (yeast)                        | 0.855857 | 5.93 | 7.38  | 5.11 | 4.67 | 7.14 | 7.47 | 7.15 | 8.71 | 5.92 | 3.08 |
| 209136_s_at  | USP10         | ubiquitin specific peptidase 10                               | 0.855857 | 6.38 | 7.79  | 2.95 | 5.28 | 5.57 | 4.18 | 6.59 | 6.58 | 5.62 | 5.24 |
| 210117_at    | SPAG1         | sperm associated antigen 1                                    | 0.855857 | 7.09 | 7.14  | 3.38 | 5.88 | 7.84 | 5.51 | 6.04 | 6.15 | 6.22 | 6.04 |
| 237556_at    | LOC728804     | Hypothetical LOC728804                                        | 0.85615  | 6.81 | 6.32  | 3.64 | 6.1  | 4.26 | 5.83 | 6.02 | 6    | 6.62 | 7.6  |
| 213188_s_at  | MINA          | MYC induced nuclear antigen                                   | 0.85615  | 4.97 | 5.68  | 4.89 | 4.66 | 5.52 | 7.55 | 7.06 | 6.34 | 4.51 | 4.08 |
| 1561870_at   | ---           | ---                                                           | 0.856212 | 5.48 | 6.42  | 3.74 | 6.31 | 5.1  | 2.21 | 5.63 | 6.55 | 6.24 | 2.83 |
| 1558700_s_at | ZNF260        | zinc finger protein 260                                       | 0.856404 | 4.92 | 6.06  | 3.56 | 3.09 | 6.49 | 5.79 | 5.11 | 6.64 | 3.63 | 4.32 |
| 218464_s_at  | C17orf63      | chromosome 17 open reading frame 63                           | 0.856404 | 5.99 | 5.46  | 6.18 | 5.82 | 4.83 | 6.96 | 4.1  | 3.9  | 6.29 | 6.38 |
| 201501_s_at  | GRSF1         | G-rich RNA sequence binding factor 1                          | 0.856774 | 5.68 | 5.51  | 4.24 | 5.57 | 6.1  | 8.08 | 6.66 | 6.04 | 5.65 | 4.68 |
| 228607_at    | OAS2          | 2'-5'-oligoadenylate synthetase 2, 69/71kDa                   | 0.856986 | 4.34 | 3.83  | 5.08 | 5.44 | 6.2  | 7.21 | 5.19 | 4.34 | 6.61 | 7.04 |
|              |               | immunoglobulin kappa locus /// immunoglobulin kappa           |          |      |       |      |      |      |      |      |      |      |      |
|              |               | constant                                                      |          |      |       |      |      |      |      |      |      |      |      |
| 221651_x_at  | IGK@ /// IGKC |                                                               | 0.85741  | 6.07 | 8.9   | 6.23 | 5.76 | 7.69 | 8    | 9.06 | 8.03 | 6.6  | 5.87 |
| 1562611_at   | ---           | ---                                                           | 0.857585 | 7.13 | 6.39  | 3.43 | 7.07 | 5.66 | 6.69 | 6.07 | 7.32 | 7.34 | 6.94 |
| 236007_at    | AKAP10        | A kinase (PRKA) anchor protein 10                             | 0.857585 | 6.48 | 6.41  | 6.44 | 6.46 | 7.68 | 8.49 | 6.15 | 7.78 | 7.8  | 4.25 |

|              |        |                                                                              |          |      |      |      |      |      |      |      |      |      |      |
|--------------|--------|------------------------------------------------------------------------------|----------|------|------|------|------|------|------|------|------|------|------|
| 238114_at    | PCMTD1 | Protein-L-isoaspartate (D-aspartate) O-methyltransferase domain containing 1 | 0.857943 | 8.27 | 7.36 | 6.48 | 7.22 | 7.01 | 6.05 | 5.08 | 4.91 | 6.73 | 7.51 |
| 1555851_s_at | SEPW1  | selenoprotein W, 1                                                           | 0.857976 | 6.59 | 8.85 | 6.66 | 5.44 | 8.55 | 8.72 | 8.55 | 8.06 | 7.34 | 8.26 |
| 1558549_s_at | VNN1   | vanin 1                                                                      | 0.858045 | 7.22 | 6.13 | 9.48 | 9.37 | 8.61 | 8.01 | 8.75 | 8.8  | 6.66 | 5.31 |
| 203147_s_at  | TRIM14 | tripartite motif-containing 14                                               | 0.858279 | 6.67 | 6.78 | 4.03 | 6.21 | 7.37 | 8.5  | 7.61 | 7    | 7.25 | 5.09 |

---
