# Supplementary material
Source: PubMed Central journal article supplement (PMC3136804)
Supplement: NIHMS210118-supplement-5.pdf [file NIHMS210118-supplement-5.pdf]

**Supplementary Table 6. Probesets with average differential expression change > 2 between microfluidic isolation and Ficoll-dextran isolation. Blue (red) genes are down (up) regulated in microfluidic isolated neutrophils compared to Ficoll-Dextran isolated neutrophils.**

| Probe Set    | Gene Symbol | Gene Title                                                       | qvalue(FDR) | Mean Log <sub>2</sub> Expression<br>for subjects 1-5 |                | log <sub>2</sub> (MF)-<br>log <sub>2</sub> (Bulk) |
|--------------|-------------|------------------------------------------------------------------|-------------|------------------------------------------------------|----------------|---------------------------------------------------|
|              |             |                                                                  |             | Microfluidic                                         | Ficoll-Dextran |                                                   |
| 1558365_at   | ---         | ---                                                              | 0.275       | 4.14153                                              | 6.4055         | -2.26397                                          |
| 1562529_s_at | ---         | ---                                                              | 0.275       | 3.30936                                              | 5.31073        | -2.00137                                          |
| 222895_s_at  | BCL11B      | B-cell CLL/lymphoma 11B (zinc finger protein)                    | 0.330       | 4.60635                                              | 7.92852        | -3.32217                                          |
| 232307_at    | ---         | ---                                                              | 0.330       | 5.5337                                               | 7.42977        | -1.89607                                          |
| 228180_at    | ---         | ---                                                              | 0.330       | 5.08012                                              | 6.6711         | -1.59098                                          |
| 1569482_at   | ---         | ---                                                              | 0.330       | 3.24714                                              | 4.78804        | -1.5409                                           |
| 237456_at    | ---         | ---                                                              | 0.330       | 6.98356                                              | 8.42898        | -1.44542                                          |
| 207185_at    | SLC10A1     | solute carrier family 10 (sodium/bile acid cotransporter family) | 0.330       | 6.20477                                              | 7.64562        | -1.44085                                          |
| 1563473_at   | ---         | ---                                                              | 0.330       | 2.5875                                               | 3.83581        | -1.24831                                          |
| 242337_at    | ---         | ---                                                              | 0.330       | 7.7319                                               | 8.97068        | -1.23878                                          |
| 1567440_at   | PSEN1       | Presenilin 1                                                     | 0.330       | 9.90476                                              | 11.0148        | -1.11004                                          |
| 243817_at    | ---         | ---                                                              | 0.330       | 4.58218                                              | 5.67799        | -1.09581                                          |
| 1567443_x_at | PSEN1       | presenilin 1                                                     | 0.330       | 9.65895                                              | 10.7501        | -1.09115                                          |
| 224752_at    | PL-5283     | PL-5283 protein                                                  | 0.330       | 8.54108                                              | 7.5166         | 1.02448                                           |
| 200661_at    | CTSA        | cathepsin A                                                      | 0.330       | 9.30509                                              | 8.22141        | 1.08368                                           |
| 228249_at    | C11orf74    | chromosome 11 open reading frame 74                              | 0.330       | 5.5524                                               | 4.24077        | 1.31163                                           |
| 223922_x_at  | MS4A6A      | membrane-spanning 4-domains, subfamily A, member 6A              | 0.330       | 8.74472                                              | 7.31818        | 1.42654                                           |
| 215958_at    | ---         | ---                                                              | 0.363       | 5.13968                                              | 7.3136         | -2.17392                                          |
| 1557915_s_at | GSTO1       | glutathione S-transferase omega 1                                | 0.406       | 9.44098                                              | 8.28257        | 1.15841                                           |
| 210479_s_at  | RORA        | RAR-related orphan receptor A                                    | 0.421       | 4.40175                                              | 6.9338         | -2.53205                                          |
| 244719_at    | ---         | ---                                                              | 0.421       | 4.20246                                              | 6.66533        | -2.46287                                          |
| 223092_at    | ANKH        | ankylosis, progressive homolog (mouse)                           | 0.421       | 4.29977                                              | 6.31356        | -2.01379                                          |
| 227868_at    | LOC154761   | hypothetical LOC154761                                           | 0.421       | 5.83873                                              | 7.56276        | -1.72403                                          |
| 1560342_at   | ---         | ---                                                              | 0.421       | 4.2838                                               | 6.00382        | -1.72002                                          |
| 239661_at    | ---         | ---                                                              | 0.421       | 5.33401                                              | 6.99868        | -1.66467                                          |
| 209670_at    | TRAC        | T cell receptor alpha constant                                   | 0.421       | 6.16675                                              | 7.74425        | -1.5775                                           |
| 243329_at    | ---         | ---                                                              | 0.421       | 4.31709                                              | 5.88297        | -1.56588                                          |
| 238988_at    | ---         | ---                                                              | 0.421       | 4.47696                                              | 5.9482         | -1.47124                                          |
| 235324_at    | SFRS3       | splicing factor, arginine/serine-rich 3                          | 0.421       | 4.84979                                              | 6.27572        | -1.42593                                          |
| 236645_at    | HBP1        | HMG-box transcription factor 1                                   | 0.421       | 6.20006                                              | 7.57818        | -1.37812                                          |
| 236595_at    | ---         | ---                                                              | 0.421       | 5.09603                                              | 6.4299         | -1.33387                                          |
| 233852_at    | POLH        | polymerase (DNA directed), eta                                   | 0.421       | 4.82765                                              | 6.09041        | -1.26276                                          |
| 216478_at    | ---         | ---                                                              | 0.421       | 3.39694                                              | 4.58287        | -1.18593                                          |
| 241906_at    | ---         | ---                                                              | 0.421       | 3.62346                                              | 4.80541        | -1.18195                                          |
| 1556277_a_at | PAPD4       | PAP associated domain containing 4                               | 0.421       | 6.11186                                              | 7.27447        | -1.16261                                          |
| 209696_at    | FBP1        | fructose-1,6-bisphosphatase 1                                    | 0.421       | 6.68583                                              | 5.66691        | 1.01892                                           |
| 231396_s_at  | FAM126A     | family with sequence similarity 126, member A                    | 0.421       | 7.92663                                              | 6.80498        | 1.12165                                           |
| 224918_x_at  | MGST1       | microsomal glutathione S-transferase 1                           | 0.421       | 5.66114                                              | 4.53236        | 1.12878                                           |
| 201360_at    | CST3        | cystatin C                                                       | 0.421       | 9.1742                                               | 7.8076         | 1.3666                                            |
| 223280_x_at  | MS4A6A      | membrane-spanning 4-domains, subfamily A, member 6A              | 0.421       | 8.90328                                              | 7.51589        | 1.38739                                           |
| 224102_at    | P2RY12      | purinergic receptor P2Y, G-protein coupled, 12                   | 0.421       | 5.55918                                              | 4.053          | 1.50618                                           |
| 209357_at    | CITED2      | Cbp/p300-interacting transactivator, with Glu/Asp-rich carbox    | 0.421       | 6.84902                                              | 5.1823         | 1.66672                                           |
| 228486_at    | SLC44A1     | solute carrier family 44, member 1                               | 0.421       | 7.24596                                              | 5.22098        | 2.02498                                           |
| 213539_at    | CD3D        | CD3d molecule, delta (CD3-TCR complex)                           | 0.424       | 5.73088                                              | 8.07502        | -2.34414                                          |
| 206666_at    | GZMK        | granzyme K (granzyme 3; tryptase II)                             | 0.424       | 4.08414                                              | 6.33835        | -2.25421                                          |
| 211339_s_at  | ITK         | IL2-inducible T-cell kinase                                      | 0.424       | 3.88213                                              | 6.0764         | -2.19427                                          |
| 202206_at    | ARL4C       | ADP-ribosylation factor-like 4C                                  | 0.424       | 5.40562                                              | 7.10115        | -1.69553                                          |
| 204890_s_at  | LCK         | lymphocyte-specific protein tyrosine kinase                      | 0.424       | 4.73564                                              | 6.41139        | -1.67575                                          |
| 219528_s_at  | BCL11B      | B-cell CLL/lymphoma 11B (zinc finger protein)                    | 0.424       | 4.49719                                              | 6.16869        | -1.6715                                           |
| 1562619_at   | TXNDC6      | thioredoxin domain containing 6                                  | 0.424       | 3.33038                                              | 4.60699        | -1.27661                                          |
| 241740_at    | ---         | ---                                                              | 0.424       | 3.12739                                              | 4.39385        | -1.26646                                          |
| 238156_at    | ---         | ---                                                              | 0.424       | 5.02315                                              | 6.28185        | -1.2587                                           |
| 215261_at    | ---         | ---                                                              | 0.424       | 5.52148                                              | 6.75771        | -1.23623                                          |
| 235680_at    | ---         | ---                                                              | 0.424       | 7.13744                                              | 8.32559        | -1.18815                                          |
| 224766_at    | RPL37       | Ribosomal protein L37                                            | 0.424       | 5.46441                                              | 6.62595        | -1.16154                                          |
| 227119_at    | CNOT6L      | CCR4-NOT transcription complex, subunit 6-like                   | 0.424       | 6.51515                                              | 7.56896        | -1.05381                                          |
| 217452_s_at  | B3GALT2     | UDP-Gal:betaGlcNAc beta 1,3-galactosyltransferase, polypepti     | 0.424       | 2.69169                                              | 3.70759        | -1.0159                                           |

|              |                          |                                                                   |       |         |         |          |
|--------------|--------------------------|-------------------------------------------------------------------|-------|---------|---------|----------|
| 224356_x_at  | MS4A6A                   | membrane-spanning 4-domains, subfamily A, member 6A               | 0.424 | 8.90559 | 7.43717 | 1.46842  |
| 210116_at    | SH2D1A                   | SH2 domain protein 1A                                             | 0.427 | 5.35275 | 7.71739 | -2.36464 |
| 207979_s_at  | CD8B                     | CD8b molecule                                                     | 0.430 | 5.6602  | 6.8351  | -1.1749  |
| 203932_at    | HLA-DMB                  | major histocompatibility complex, class II, DM beta               | 0.430 | 7.42606 | 6.11469 | 1.31137  |
| 205456_at    | CD3E                     | CD3e molecule, epsilon (CD3-TCR complex)                          | 0.451 | 4.64514 | 6.63142 | -1.98628 |
| 237626_at    | ---                      | ---                                                               | 0.452 | 6.79303 | 8.36796 | -1.57493 |
| 205758_at    | CD8A                     | CD8a molecule                                                     | 0.454 | 4.85774 | 7.71533 | -2.85759 |
| 1565666_s_at | LOC100133432 /// LOC100  | similar to Mucin-6 precursor (Gastric mucin-6) /// similar to M   | 0.454 | 2.82795 | 5.52981 | -2.70186 |
| 1558691_a_at | DOCK4                    | dedicator of cytokinesis 4                                        | 0.454 | 5.27116 | 7.84946 | -2.5783  |
| 210426_x_at  | RORA                     | RAR-related orphan receptor A                                     | 0.454 | 4.72869 | 7.09176 | -2.36307 |
| 210972_x_at  | TRA@ /// TRAC /// TRAJ17 | T cell receptor alpha locus /// T cell receptor alpha constant // | 0.454 | 6.33212 | 8.51505 | -2.18293 |
| 206804_at    | CD3G                     | CD3g molecule, gamma (CD3-TCR complex)                            | 0.454 | 5.32531 | 7.4536  | -2.12829 |
| 230464_at    | S1PR5                    | sphingosine-1-phosphate receptor 5                                | 0.454 | 5.86957 | 7.97631 | -2.10674 |
| 236510_at    | ---                      | ---                                                               | 0.454 | 5.2783  | 7.36919 | -2.09089 |
| 221558_s_at  | LEF1                     | lymphoid enhancer-binding factor 1                                | 0.454 | 4.87602 | 6.9663  | -2.09028 |
| 1562528_at   | ---                      | ---                                                               | 0.454 | 2.01136 | 4.05345 | -2.04209 |
| 206545_at    | CD28                     | CD28 molecule                                                     | 0.454 | 3.54209 | 5.49255 | -1.95046 |
| 244061_at    | ---                      | ---                                                               | 0.454 | 4.76363 | 6.69714 | -1.93351 |
| 234778_at    | ---                      | ---                                                               | 0.454 | 5.23201 | 7.15215 | -1.92014 |
| 1565588_at   | SP140                    | SP140 nuclear body protein                                        | 0.454 | 4.03991 | 5.8446  | -1.80469 |
| 1569477_at   | ---                      | ---                                                               | 0.454 | 6.42708 | 8.21056 | -1.78348 |
| 229483_at    | ---                      | ---                                                               | 0.454 | 4.54721 | 6.33031 | -1.7831  |
| 209671_x_at  | TRA@ /// TRAC            | T cell receptor alpha locus /// T cell receptor alpha constant    | 0.454 | 6.36478 | 8.13996 | -1.77518 |
| 233289_at    | ---                      | ---                                                               | 0.454 | 5.22032 | 6.8642  | -1.64388 |
| 211902_x_at  | TRA@                     | T cell receptor alpha locus                                       | 0.454 | 6.51035 | 8.14226 | -1.63191 |
| 223527_s_at  | CDADC1                   | cytidine and dCMP deaminase domain containing 1                   | 0.454 | 5.6803  | 7.31002 | -1.62972 |
| 240344_x_at  | LYRM7                    | Lyrm7 homolog (mouse)                                             | 0.454 | 6.36197 | 7.98024 | -1.61827 |
| 1569077_x_at | ZNF836                   | zinc finger protein 836                                           | 0.454 | 4.78537 | 6.37591 | -1.59054 |
| 227686_at    | OXNAD1                   | oxidoreductase NAD-binding domain containing 1                    | 0.454 | 6.12246 | 7.69895 | -1.57649 |
| 232344_at    | ---                      | ---                                                               | 0.454 | 7.04172 | 8.59902 | -1.5573  |
| 1556607_at   | EHD4                     | EH-domain containing 4                                            | 0.454 | 5.21393 | 6.74767 | -1.53374 |
| 239655_at    | ---                      | ---                                                               | 0.454 | 3.93822 | 5.45632 | -1.5181  |
| 228433_at    | NFYA                     | nuclear transcription factor Y, alpha                             | 0.454 | 5.75103 | 7.24994 | -1.49891 |
| 225187_at    | KIAA1967                 | KIAA1967                                                          | 0.454 | 5.65861 | 7.10882 | -1.45021 |
| 228211_at    | C9orf102                 | chromosome 9 open reading frame 102                               | 0.454 | 4.55952 | 5.95735 | -1.39783 |
| 236341_at    | CTLA4                    | cytotoxic T-lymphocyte-associated protein 4                       | 0.454 | 3.43824 | 4.83029 | -1.39205 |
| 239829_at    | ---                      | ---                                                               | 0.454 | 4.65366 | 6.02145 | -1.36779 |
| 213019_at    | RANBP6                   | RAN binding protein 6                                             | 0.454 | 6.38535 | 7.73414 | -1.34879 |
| 226116_at    | ---                      | ---                                                               | 0.454 | 3.83316 | 5.17606 | -1.3429  |
| 239861_at    | ---                      | ---                                                               | 0.454 | 7.15376 | 8.47552 | -1.32176 |
| 237746_at    | SFRS11                   | Splicing factor, arginine/serine-rich 11                          | 0.454 | 5.66732 | 6.98402 | -1.3167  |
| 243561_at    | ---                      | ---                                                               | 0.454 | 4.76075 | 6.05437 | -1.29362 |
| 240652_at    | ---                      | ---                                                               | 0.454 | 5.63074 | 6.91022 | -1.27948 |
| 211435_at    | ---                      | ---                                                               | 0.454 | 5.02694 | 6.30392 | -1.27698 |
| 226981_at    | MLL                      | Myeloid/lymphoid or mixed-lineage leukemia (trithorax homo        | 0.454 | 3.94961 | 5.22376 | -1.27415 |
| 239571_at    | ---                      | ---                                                               | 0.454 | 5.8535  | 7.11971 | -1.26621 |
| 214323_s_at  | UPF3A                    | UPF3 regulator of nonsense transcripts homolog A (yeast)          | 0.454 | 5.47538 | 6.74138 | -1.266   |
| 1557801_x_at | C11orf31                 | chromosome 11 open reading frame 31                               | 0.454 | 5.90196 | 7.16522 | -1.26326 |
| 239504_at    | ---                      | ---                                                               | 0.454 | 4.8312  | 6.08311 | -1.25191 |
| 212604_at    | MRPS31                   | mitochondrial ribosomal protein S31                               | 0.454 | 6.58557 | 7.82236 | -1.23679 |
| 37943_at     | ZFYVE26                  | zinc finger, FYVE domain containing 26                            | 0.454 | 4.39818 | 5.62619 | -1.22801 |
| 229686_at    | P2RY8                    | purinergic receptor P2Y, G-protein coupled, 8                     | 0.454 | 8.81334 | 10.0095 | -1.19616 |
| 213073_at    | ZFYVE26                  | zinc finger, FYVE domain containing 26                            | 0.454 | 5.63015 | 6.81836 | -1.18821 |
| 236338_at    | ---                      | ---                                                               | 0.454 | 5.6839  | 6.8617  | -1.1778  |
| 210621_s_at  | RASA1                    | RAS p21 protein activator (GTPase activating protein) 1           | 0.454 | 5.32955 | 6.49458 | -1.16503 |
| 238438_at    | CNOT6L                   | CCR4-NOT transcription complex, subunit 6-like                    | 0.454 | 4.99417 | 6.15017 | -1.156   |
| 204157_s_at  | KIAA0999                 | KIAA0999 protein                                                  | 0.454 | 7.11468 | 8.25484 | -1.14016 |
| 232354_at    | ---                      | ---                                                               | 0.454 | 5.02031 | 6.15472 | -1.13441 |
| 241865_at    | ---                      | ---                                                               | 0.454 | 8.03896 | 9.17252 | -1.13356 |
| 209315_at    | HBS1L                    | HBS1-like ( <i>S. cerevisiae</i> )                                | 0.454 | 5.30182 | 6.43284 | -1.13102 |
| 224763_at    | RPL37                    | Ribosomal protein L37                                             | 0.454 | 5.40426 | 6.53287 | -1.12861 |
| 226037_s_at  | TAF9B                    | TAF9B RNA polymerase II, TATA box binding protein (TBP)-ass       | 0.454 | 6.29182 | 7.41484 | -1.12302 |
| 232304_at    | PELI1                    | Pellino homolog 1 ( <i>Drosophila</i> )                           | 0.454 | 8.82955 | 9.92746 | -1.09791 |
| 212926_at    | SMC5                     | structural maintenance of chromosomes 5                           | 0.454 | 4.2384  | 5.32244 | -1.08404 |
| 210223_s_at  | MR1                      | major histocompatibility complex, class I-related                 | 0.454 | 7.89143 | 8.9719  | -1.08047 |

|              |                                                                                 |                                                                 |       |         |         |          |
|--------------|---------------------------------------------------------------------------------|-----------------------------------------------------------------|-------|---------|---------|----------|
| 219269_at    | HMBOX1                                                                          | homeobox containing 1                                           | 0.454 | 4.58186 | 5.65967 | -1.07781 |
| 230489_at    | CD5                                                                             | CD5 molecule                                                    | 0.454 | 5.42017 | 6.47902 | -1.05885 |
| 231470_at    | ---                                                                             | ---                                                             | 0.454 | 3.96809 | 5.01709 | -1.049   |
| 240165_at    | ---                                                                             | ---                                                             | 0.454 | 8.62817 | 9.67472 | -1.04655 |
| 239401_at    | S1PR1                                                                           | Sphingosine-1-phosphate receptor 1                              | 0.454 | 3.94138 | 4.986   | -1.04462 |
| 228917_at    | ---                                                                             | ---                                                             | 0.454 | 3.57059 | 4.60993 | -1.03934 |
| 242946_at    | CD53                                                                            | CD53 molecule                                                   | 0.454 | 8.92099 | 9.95532 | -1.03433 |
| 244312_at    | ---                                                                             | ---                                                             | 0.454 | 4.14778 | 5.16383 | -1.01605 |
| 1555889_a_at | CRTAP                                                                           | cartilage associated protein                                    | 0.454 | 7.75975 | 6.74337 | 1.01638  |
| 209500_x_at  | TNFSF12-TNFSF13 /// TNFSF12-TNFSF13 readthrough transcript /// tumor necrosis f |                                                                 | 0.454 | 7.60369 | 6.57791 | 1.02578  |
| 203394_s_at  | HES1                                                                            | hairy and enhancer of split 1, (Drosophila)                     | 0.454 | 7.27507 | 6.20573 | 1.06934  |
| 1565162_s_at | MGST1                                                                           | microsomal glutathione S-transferase 1                          | 0.454 | 3.94188 | 2.86476 | 1.07712  |
| 223276_at    | MST150                                                                          | MSTP150                                                         | 0.454 | 8.04639 | 6.96852 | 1.07787  |
| 210347_s_at  | BCL11A                                                                          | B-cell CLL/lymphoma 11A (zinc finger protein)                   | 0.454 | 5.90607 | 4.80915 | 1.09692  |
| 210314_x_at  | TNFSF13                                                                         | tumor necrosis factor (ligand) superfamily, member 13           | 0.454 | 7.63162 | 6.52704 | 1.10458  |
| 1555123_at   | ST6GAL2                                                                         | ST6 beta-galactosamide alpha-2,6-sialyltransferase 2            | 0.454 | 3.84706 | 2.73051 | 1.11655  |
| 1554464_a_at | CRTAP                                                                           | cartilage associated protein                                    | 0.454 | 5.3152  | 4.15887 | 1.15633  |
| 221765_at    | UGCG                                                                            | UDP-glucose ceramide glucosyltransferase                        | 0.454 | 5.52702 | 4.34279 | 1.18423  |
| 231211_s_at  | YIF1B                                                                           | Yip1 interacting factor homolog B (S. cerevisiae)               | 0.454 | 6.62752 | 5.4232  | 1.20432  |
| 202944_at    | NAGA                                                                            | N-acetylgalactosaminidase, alpha-                               | 0.454 | 6.85959 | 5.64832 | 1.21127  |
| 218117_at    | RBX1                                                                            | ring-box 1                                                      | 0.454 | 8.19849 | 6.94416 | 1.25433  |
| 214469_at    | HIST1H2AE                                                                       | histone cluster 1, H2ae                                         | 0.454 | 9.86686 | 8.56143 | 1.30543  |
| 222552_at    | GOLT1B                                                                          | golgi transport 1 homolog B (S. cerevisiae)                     | 0.454 | 6.41208 | 5.08969 | 1.32239  |
| 209499_x_at  | TNFSF12-TNFSF13 /// TNFSF12-TNFSF13 readthrough transcript /// tumor necrosis f |                                                                 | 0.454 | 7.0333  | 5.70759 | 1.32571  |
| 210987_x_at  | TPM1                                                                            | tropomyosin 1 (alpha)                                           | 0.454 | 7.32378 | 5.98711 | 1.33667  |
| 200824_at    | GSTP1                                                                           | glutathione S-transferase pi 1                                  | 0.454 | 8.26694 | 6.91943 | 1.34751  |
| 220570_at    | RETN                                                                            | resistin                                                        | 0.454 | 7.19783 | 5.82361 | 1.37422  |
| 242038_at    | LRR8B                                                                           | leucine rich repeat containing 8 family, member B               | 0.454 | 7.93507 | 6.55675 | 1.37832  |
| 219506_at    | C1orf54                                                                         | chromosome 1 open reading frame 54                              | 0.454 | 6.0764  | 4.60096 | 1.47544  |
| 210843_s_at  | MFAP3L                                                                          | microfibrillar-associated protein 3-like                        | 0.454 | 6.90331 | 5.37311 | 1.5302   |
| 213258_at    | TFPI                                                                            | tissue factor pathway inhibitor (lipoprotein-associated coagula | 0.454 | 4.32018 | 2.66736 | 1.65282  |
| 210986_s_at  | TPM1                                                                            | tropomyosin 1 (alpha)                                           | 0.454 | 6.52527 | 4.79766 | 1.72761  |
| 226018_at    | C7orf41                                                                         | chromosome 7 open reading frame 41                              | 0.454 | 7.73111 | 5.89093 | 1.84018  |
| 210895_s_at  | CD86                                                                            | CD86 molecule                                                   | 0.454 | 5.21563 | 3.36138 | 1.85425  |
| 204112_s_at  | HNMT                                                                            | histamine N-methyltransferase                                   | 0.454 | 5.40026 | 3.48177 | 1.91849  |
| 201506_at    | TGFBI                                                                           | transforming growth factor, beta-induced, 68kDa                 | 0.454 | 8.33708 | 6.38512 | 1.95196  |
| 212224_at    | ALDH1A1                                                                         | aldehyde dehydrogenase 1 family, member A1                      | 0.454 | 7.89658 | 5.88312 | 2.01346  |
| 216834_at    | RGS1                                                                            | regulator of G-protein signaling 1                              | 0.455 | 4.10969 | 6.05967 | -1.94998 |
| 200736_s_at  | GPX1                                                                            | glutathione peroxidase 1                                        | 0.455 | 8.96884 | 7.75941 | 1.20943  |
| 229541_at    | ---                                                                             | ---                                                             | 0.456 | 5.41261 | 6.48867 | -1.07606 |
| 39248_at     | AQP3                                                                            | aquaporin 3 (Gill blood group)                                  | 0.459 | 6.62173 | 9.82725 | -3.20552 |
| 202988_s_at  | RGS1                                                                            | regulator of G-protein signaling 1                              | 0.459 | 6.16323 | 8.07935 | -1.91612 |
| 236266_at    | RORA                                                                            | RAR-related orphan receptor A                                   | 0.463 | 4.99456 | 6.98257 | -1.98801 |
| 234044_at    | ---                                                                             | ---                                                             | 0.463 | 7.05028 | 8.79184 | -1.74156 |
| 237330_at    | ---                                                                             | ---                                                             | 0.463 | 7.06725 | 8.24877 | -1.18152 |
| 201464_x_at  | JUN                                                                             | jun oncogene                                                    | 0.463 | 8.86217 | 9.87624 | -1.01407 |
| 228376_at    | GGTA1                                                                           | glycoprotein, alpha-galactosyltransferase 1                     | 0.463 | 6.36979 | 4.95019 | 1.4196   |
| 243141_at    | SGMS2                                                                           | sphingomyelin synthase 2                                        | 0.463 | 5.76655 | 4.28815 | 1.4784   |
| 224637_at    | LOC100128731                                                                    | dolichyl-diphosphooligosaccharide--protein glycosyltransferas   | 0.464 | 10.5362 | 9.34466 | 1.19154  |
| 207651_at    | GPR171                                                                          | G protein-coupled receptor 171                                  | 0.464 | 4.17282 | 6.45171 | -2.27889 |
| 203828_s_at  | IL32                                                                            | interleukin 32                                                  | 0.464 | 7.02434 | 8.80073 | -1.77639 |
| 228097_at    | MYLIP                                                                           | myosin regulatory light chain interacting protein               | 0.464 | 4.59682 | 6.13408 | -1.53726 |
| 204891_s_at  | LCK                                                                             | lymphocyte-specific protein tyrosine kinase                     | 0.464 | 4.4674  | 5.72097 | -1.25357 |
| 223818_s_at  | RSF1                                                                            | remodeling and spacing factor 1                                 | 0.464 | 6.96936 | 8.1714  | -1.20204 |
| 243659_at    | ---                                                                             | ---                                                             | 0.464 | 4.40296 | 5.56982 | -1.16686 |
| 242659_at    | ---                                                                             | ---                                                             | 0.464 | 6.00705 | 7.13792 | -1.13087 |
| 239757_at    | ZFAND6                                                                          | Zinc finger, AN1-type domain 6                                  | 0.467 | 4.79426 | 6.44155 | -1.64729 |
| 229914_at    | FLJ38717                                                                        | FLJ38717 protein                                                | 0.467 | 6.55714 | 7.65205 | -1.09491 |
| 227961_at    | CTSB                                                                            | cathepsin B                                                     | 0.470 | 4.51236 | 3.33116 | 1.1812   |
| 219318_x_at  | MED31                                                                           | mediator complex subunit 31                                     | 0.480 | 5.0929  | 6.82164 | -1.72874 |
| 206363_at    | MAF                                                                             | v-maf musculoaponeurotic fibrosarcoma oncogene homolog (        | 0.480 | 4.89363 | 6.5578  | -1.66417 |
| 208078_s_at  | SIK1                                                                            | salt-inducible kinase 1                                         | 0.480 | 7.01045 | 8.60103 | -1.59058 |
| 242960_at    | EPC2                                                                            | Enhancer of polycomb homolog 2 (Drosophila)                     | 0.480 | 5.87135 | 7.43599 | -1.56464 |
| 1554615_at   | ---                                                                             | ---                                                             | 0.480 | 4.80168 | 6.27272 | -1.47104 |
| 229064_s_at  | RCAN3                                                                           | RCAN family member 3                                            | 0.480 | 5.36328 | 6.76155 | -1.39827 |

|              |                     |                                                                  |       |         |         |          |
|--------------|---------------------|------------------------------------------------------------------|-------|---------|---------|----------|
| 244423_at    | ---                 | ---                                                              | 0.480 | 7.08983 | 8.46958 | -1.37975 |
| 232356_at    | ---                 | ---                                                              | 0.480 | 5.54931 | 6.92136 | -1.37205 |
| 1559006_at   | ---                 | ---                                                              | 0.480 | 4.53057 | 5.90078 | -1.37021 |
| 1557551_at   | ---                 | ---                                                              | 0.480 | 4.91219 | 6.28085 | -1.36866 |
| 232789_at    | ---                 | ---                                                              | 0.480 | 4.94909 | 6.30352 | -1.35443 |
| 235159_at    | ---                 | ---                                                              | 0.480 | 5.38635 | 6.72865 | -1.34223 |
| 230036_at    | SAMD9L              | sterile alpha motif domain containing 9-like                     | 0.480 | 6.60582 | 7.89236 | -1.28654 |
| 244537_at    | ---                 | ---                                                              | 0.480 | 3.44565 | 4.72701 | -1.28136 |
| 234849_at    | TRA@                | T cell receptor alpha locus                                      | 0.480 | 2.50689 | 3.77913 | -1.27224 |
| 1560297_at   | ---                 | ---                                                              | 0.480 | 7.07249 | 8.33463 | -1.26214 |
| 1556735_at   | ---                 | ---                                                              | 0.480 | 4.74338 | 5.99679 | -1.25341 |
| 240148_at    | MSH6                | MutS homolog 6 (E. coli)                                         | 0.480 | 4.93612 | 6.1798  | -1.24368 |
| 212781_at    | RBBP6               | retinoblastoma binding protein 6                                 | 0.480 | 6.52599 | 7.71419 | -1.1882  |
| 213958_at    | CD6                 | CD6 molecule                                                     | 0.480 | 5.56878 | 6.74556 | -1.17678 |
| 213653_at    | METTL3              | methyltransferase like 3                                         | 0.480 | 6.33565 | 7.50988 | -1.17423 |
| 213657_s_at  | ---                 | ---                                                              | 0.480 | 4.89539 | 6.06474 | -1.16935 |
| 205254_x_at  | TCF7                | transcription factor 7 (T-cell specific, HMG-box)                | 0.480 | 5.35988 | 6.4692  | -1.10932 |
| 230099_at    | ---                 | ---                                                              | 0.480 | 5.44779 | 6.54232 | -1.09453 |
| 238243_at    | ---                 | ---                                                              | 0.480 | 5.59165 | 6.68518 | -1.09353 |
| 236295_s_at  | NLR3                | NLR family, CARD domain containing 3                             | 0.480 | 3.44031 | 4.51007 | -1.06976 |
| 1558787_a_at | ---                 | ---                                                              | 0.480 | 3.32744 | 4.39495 | -1.06751 |
| 215796_at    | ---                 | ---                                                              | 0.480 | 2.7095  | 3.76297 | -1.05347 |
| 228531_at    | SAMD9               | sterile alpha motif domain containing 9                          | 0.480 | 9.91032 | 10.9625 | -1.05218 |
| 239266_at    | ---                 | ---                                                              | 0.480 | 5.10743 | 6.15512 | -1.04769 |
| 212677_s_at  | CEP68               | centrosomal protein 68kDa                                        | 0.480 | 5.96675 | 7.01275 | -1.046   |
| 231127_at    | ---                 | ---                                                              | 0.480 | 7.02748 | 8.05968 | -1.0322  |
| 208453_s_at  | XPNPEP1             | X-prolyl aminopeptidase (aminopeptidase P) 1, soluble            | 0.480 | 4.8967  | 3.88761 | 1.00909  |
| 210075_at    | 2-Mar               | membrane-associated ring finger (C3HC4) 2                        | 0.480 | 6.86954 | 5.85366 | 1.01588  |
| 225693_s_at  | CAMTA1              | calmodulin binding transcription activator 1                     | 0.480 | 8.88899 | 7.86681 | 1.02218  |
| 235237_at    | VMA21               | VMA21 vacuolar H <sup>+</sup> -ATPase homolog (S. cerevisiae)    | 0.480 | 6.97744 | 5.93263 | 1.04481  |
| 224331_s_at  | MRPL36              | mitochondrial ribosomal protein L36                              | 0.480 | 8.42491 | 7.25867 | 1.16624  |
| 213908_at    | WHAMML1 /// WHAMML2 | WAS protein homolog associated with actin, golgi membranes       | 0.480 | 4.4641  | 3.15816 | 1.30594  |
| 203645_s_at  | CD163               | CD163 molecule                                                   | 0.480 | 7.78417 | 6.28021 | 1.50396  |
| 227461_at    | STON2               | stonin 2                                                         | 0.480 | 5.32954 | 3.77803 | 1.55151  |
| 230550_at    | MS4A6A              | membrane-spanning 4-domains, subfamily A, member 6A              | 0.480 | 7.54257 | 5.97003 | 1.57254  |
| 210254_at    | MS4A3               | membrane-spanning 4-domains, subfamily A, member 3 (hem          | 0.480 | 9.77658 | 7.88846 | 1.88812  |
| 223754_at    | C2orf88             | chromosome 2 open reading frame 88                               | 0.480 | 7.12366 | 5.16655 | 1.95711  |
| 227268_at    | RNFT1               | ring finger protein, transmembrane 1                             | 0.481 | 5.13101 | 4.11041 | 1.0206   |
| 240721_at    | ---                 | ---                                                              | 0.481 | 4.80302 | 6.95864 | -2.15562 |
| 1558052_at   | TMED4               | transmembrane emp24 protein transport domain containing 4        | 0.481 | 2.84781 | 4.93298 | -2.08517 |
| 226682_at    | RORA                | RAR-related orphan receptor A                                    | 0.481 | 3.30982 | 5.12977 | -1.81995 |
| 210031_at    | CD247               | CD247 molecule                                                   | 0.481 | 6.02887 | 7.79639 | -1.76752 |
| 212289_at    | ANKRD12             | ankyrin repeat domain 12                                         | 0.481 | 7.59621 | 9.31898 | -1.72277 |
| 210439_at    | ICOS                | inducible T-cell co-stimulator                                   | 0.481 | 4.43665 | 6.15621 | -1.71956 |
| 234033_at    | ---                 | ---                                                              | 0.481 | 3.56252 | 5.20709 | -1.64457 |
| 242320_at    | ---                 | ---                                                              | 0.481 | 6.46564 | 8.05511 | -1.58947 |
| 209604_s_at  | GATA3               | GATA binding protein 3                                           | 0.481 | 4.0684  | 5.65061 | -1.58221 |
| 230048_at    | ---                 | ---                                                              | 0.481 | 7.03291 | 8.60081 | -1.5679  |
| 239152_at    | ---                 | ---                                                              | 0.481 | 9.13585 | 10.6798 | -1.54395 |
| 235739_at    | ---                 | ---                                                              | 0.481 | 5.85927 | 7.40171 | -1.54244 |
| 202207_at    | ARL4C               | ADP-ribosylation factor-like 4C                                  | 0.481 | 5.76392 | 7.30256 | -1.53864 |
| 204642_at    | S1PR1               | sphingosine-1-phosphate receptor 1                               | 0.481 | 6.49906 | 8.01203 | -1.51297 |
| 242898_at    | EIF2AK2             | eukaryotic translation initiation factor 2-alpha kinase 2        | 0.481 | 6.03734 | 7.54304 | -1.5057  |
| 231875_at    | KIF21A              | kinesin family member 21A                                        | 0.481 | 4.59662 | 6.06259 | -1.46597 |
| 1556608_a_at | EHD4                | EH-domain containing 4                                           | 0.481 | 5.55451 | 6.99718 | -1.44267 |
| 244840_x_at  | DOCK4               | dedicator of cytokinesis 4                                       | 0.481 | 5.6373  | 7.04209 | -1.40479 |
| 208467_at    | KLF12               | Kruppel-like factor 12                                           | 0.481 | 4.48113 | 5.87745 | -1.39632 |
| 1553118_at   | THEM4               | thioesterase superfamily member 4                                | 0.481 | 4.16512 | 5.55257 | -1.38745 |
| 233647_s_at  | CDADC1              | cytidine and dCMP deaminase domain containing 1                  | 0.481 | 6.17475 | 7.55392 | -1.37917 |
| 229844_at    | ---                 | ---                                                              | 0.481 | 5.20356 | 6.58078 | -1.37722 |
| 234196_at    | ---                 | ---                                                              | 0.481 | 5.8462  | 7.21734 | -1.37114 |
| 227261_at    | KLF12               | Kruppel-like factor 12                                           | 0.481 | 4.06982 | 5.42577 | -1.35595 |
| 1559410_at   | ---                 | ---                                                              | 0.481 | 4.15012 | 5.45309 | -1.30297 |
| 204197_s_at  | RUNX3               | runt-related transcription factor 3                              | 0.481 | 6.13293 | 7.42497 | -1.29204 |
| 226991_at    | NFATC2              | Nuclear factor of activated T-cells, cytoplasmic, calcineurin-de | 0.481 | 6.26627 | 7.55749 | -1.29122 |

|              |          |                                                              |       |         |         |          |
|--------------|----------|--------------------------------------------------------------|-------|---------|---------|----------|
| 239045_at    | ---      | ---                                                          | 0.481 | 7.59703 | 8.85179 | -1.25476 |
| 1563259_at   | ---      | ---                                                          | 0.481 | 5.11778 | 6.35405 | -1.23627 |
| 229470_at    | ---      | ---                                                          | 0.481 | 5.82124 | 7.05111 | -1.22987 |
| 243182_at    | ---      | ---                                                          | 0.481 | 6.45715 | 7.68312 | -1.22597 |
| 202479_s_at  | TRIB2    | tribbles homolog 2 (Drosophila)                              | 0.481 | 5.51418 | 6.7284  | -1.21422 |
| 1554250_s_at | TRIM73   | tripartite motif-containing 73                               | 0.481 | 2.60226 | 3.8     | -1.19774 |
| 202524_s_at  | SPOCK2   | sparc/osteonectin, cwcv and kazal-like domains proteoglycan  | 0.481 | 6.91344 | 8.11024 | -1.1968  |
| 222667_s_at  | ASH1L    | ash1 (absent, small, or homeotic)-like (Drosophila)          | 0.481 | 6.34638 | 7.54087 | -1.19449 |
| 226124_at    | ZFP90    | zinc finger protein 90 homolog (mouse)                       | 0.481 | 3.26766 | 4.3818  | -1.11414 |
| 1568665_at   | RNF103   | ring finger protein 103                                      | 0.481 | 4.47391 | 5.57813 | -1.10422 |
| 204156_at    | KIAA0999 | KIAA0999 protein                                             | 0.481 | 8.08311 | 9.17933 | -1.09622 |
| 37590_g_at   | ---      | ---                                                          | 0.481 | 5.9834  | 7.06345 | -1.08005 |
| 212368_at    | ZNF292   | zinc finger protein 292                                      | 0.481 | 7.23764 | 8.30527 | -1.06763 |
| 1557370_s_at | MYCBP2   | MYC binding protein 2                                        | 0.481 | 6.184   | 7.23157 | -1.04757 |
| 214686_at    | ZNF266   | zinc finger protein 266                                      | 0.481 | 5.96535 | 6.9999  | -1.03455 |
| 239923_at    | ---      | ---                                                          | 0.481 | 6.96814 | 7.98569 | -1.01755 |
| 235813_at    | ---      | ---                                                          | 0.481 | 2.6526  | 3.66881 | -1.01621 |
| 202201_at    | BLVRB    | biliverdin reductase B (flavin reductase (NADPH))            | 0.481 | 7.22483 | 6.21622 | 1.00861  |
| 212192_at    | KCTD12   | potassium channel tetramerisation domain containing 12       | 0.481 | 8.84778 | 7.82149 | 1.02629  |
| 223649_s_at  | SLC25A39 | solute carrier family 25, member 39                          | 0.481 | 5.90113 | 4.87427 | 1.02686  |
| 225651_at    | UBE2E2   | ubiquitin-conjugating enzyme E2E 2 (UBC4/5 homolog, yeast)   | 0.481 | 5.6007  | 4.55762 | 1.04308  |
| 235885_at    | P2RY12   | purinergic receptor P2Y, G-protein coupled, 12               | 0.481 | 3.71898 | 2.65788 | 1.0611   |
| 201125_s_at  | ITGB5    | integrin, beta 5                                             | 0.481 | 6.03581 | 4.96494 | 1.07087  |
| 212188_at    | KCTD12   | potassium channel tetramerisation domain containing 12       | 0.481 | 9.80269 | 8.66702 | 1.13567  |
| 1562007_at   | ---      | ---                                                          | 0.481 | 7.70999 | 6.55832 | 1.15167  |
| 205967_at    | HIST1H4C | histone cluster 1, H4c                                       | 0.481 | 8.7901  | 7.60105 | 1.18905  |
| 203432_at    | TMPO     | thymopoietin                                                 | 0.481 | 5.11566 | 3.86967 | 1.24599  |
| 229830_at    | ---      | ---                                                          | 0.481 | 6.28005 | 5.02468 | 1.25537  |
| 211732_x_at  | HNMT     | histamine N-methyltransferase                                | 0.481 | 7.0013  | 5.72886 | 1.27244  |
| 213792_s_at  | INSR     | insulin receptor                                             | 0.481 | 7.15155 | 5.83231 | 1.31924  |
| 209772_s_at  | CD24     | CD24 molecule                                                | 0.481 | 7.60746 | 6.27996 | 1.3275   |
| 224598_at    | MGAT4B   | mannosyl (alpha-1,3-)-glycoprotein beta-1,4-N-acetylglucosar | 0.481 | 6.00075 | 4.67062 | 1.33013  |
| 208553_at    | HIST1H1E | histone cluster 1, H1e                                       | 0.481 | 8.97644 | 7.58137 | 1.39507  |
| 205557_at    | BPI      | bactericidal/permeability-increasing protein                 | 0.481 | 7.48709 | 5.98459 | 1.5025   |
| 215049_x_at  | CD163    | CD163 molecule                                               | 0.481 | 7.86059 | 6.28755 | 1.57304  |
| 204838_s_at  | MLH3     | mutL homolog 3 (E. coli)                                     | 0.481 | 7.68486 | 5.96791 | 1.71695  |
| 205859_at    | LY86     | lymphocyte antigen 86                                        | 0.481 | 5.7691  | 4.03583 | 1.73327  |
| 1554892_a_at | MS4A3    | membrane-spanning 4-domains, subfamily A, member 3 (hem      | 0.481 | 6.10458 | 4.22435 | 1.88023  |
| 205653_at    | CTSG     | cathepsin G                                                  | 0.481 | 8.24895 | 6.10518 | 2.14377  |
| 235102_x_at  | ---      | ---                                                          | 0.483 | 9.17045 | 7.36513 | 1.80532  |
| 243857_at    | MORF4L2  | Mortality factor 4 like 2                                    | 0.483 | 3.67383 | 5.10558 | -1.43175 |
| 205934_at    | PLCL1    | phospholipase C-like 1                                       | 0.483 | 4.31198 | 5.33937 | -1.02739 |
| 205987_at    | CD1C     | CD1c molecule                                                | 0.484 | 6.03808 | 4.64374 | 1.39434  |
| 242143_at    | ---      | ---                                                          | 0.487 | 3.37474 | 4.6914  | -1.31666 |
| 203716_s_at  | DPP4     | dipeptidyl-peptidase 4                                       | 0.489 | 4.62117 | 6.15573 | -1.53456 |
| 239555_at    | ---      | ---                                                          | 0.489 | 7.44463 | 8.45092 | -1.00629 |
| 204777_s_at  | MAL      | mal, T-cell differentiation protein                          | 0.489 | 4.92148 | 6.43858 | -1.5171  |
| 214771_x_at  | MPRIP    | myosin phosphatase Rho interacting protein                   | 0.490 | 5.81751 | 6.88402 | -1.06651 |
| 240144_at    | DNASE1   | deoxyribonuclease I                                          | 0.490 | 5.36241 | 6.40529 | -1.04288 |
| 202768_at    | FOSB     | FBJ murine osteosarcoma viral oncogene homolog B             | 0.491 | 9.28446 | 11.1907 | -1.90624 |
| 239453_at    | ---      | ---                                                          | 0.491 | 5.81663 | 7.39482 | -1.57819 |
| 205831_at    | CD2      | CD2 molecule                                                 | 0.491 | 4.81721 | 6.29959 | -1.48238 |
| 230383_x_at  | ---      | ---                                                          | 0.491 | 5.22792 | 6.6665  | -1.43858 |
| 1558972_s_at | TSEPA    | thymocyte selection pathway associated                       | 0.491 | 2.58246 | 3.96665 | -1.38419 |
| 213294_at    | EIF2AK2  | eukaryotic translation initiation factor 2-alpha kinase 2    | 0.491 | 5.36309 | 6.74044 | -1.37735 |
| 226272_at    | RCAN3    | RCAN family member 3                                         | 0.491 | 4.09517 | 5.399   | -1.30383 |
| 239131_at    | ---      | ---                                                          | 0.491 | 4.23124 | 5.51857 | -1.28733 |
| 1557799_at   | C11orf31 | chromosome 11 open reading frame 31                          | 0.491 | 5.81864 | 7.10361 | -1.28497 |
| 236293_at    | ---      | ---                                                          | 0.491 | 4.35455 | 5.6279  | -1.27335 |
| 222326_at    | ---      | ---                                                          | 0.491 | 7.50495 | 8.77574 | -1.27079 |
| 1562962_at   | ---      | ---                                                          | 0.491 | 4.5036  | 5.7569  | -1.2533  |
| 238430_x_at  | SLFN5    | schlafen family member 5                                     | 0.491 | 7.7927  | 9.01606 | -1.22336 |
| 231495_at    | ---      | ---                                                          | 0.491 | 3.49964 | 4.72119 | -1.22155 |
| 1556698_a_at | GPRIN3   | GPRIN family member 3                                        | 0.491 | 3.95144 | 5.1664  | -1.21496 |
| 231292_at    | EID3     | EP300 interacting inhibitor of differentiation 3             | 0.491 | 4.69311 | 5.89579 | -1.20268 |

|              |                         |                                                              |       |         |         |          |
|--------------|-------------------------|--------------------------------------------------------------|-------|---------|---------|----------|
| 209570_s_at  | D4S234E                 | DNA segment on chromosome 4 (unique) 234 expressed sequ      | 0.491 | 5.32042 | 6.52008 | -1.19966 |
| 212079_s_at  | MLL                     | myeloid/lymphoid or mixed-lineage leukemia (trithorax homo   | 0.491 | 4.80294 | 5.96969 | -1.16675 |
| 244796_at    | ---                     | ---                                                          | 0.491 | 6.4823  | 7.58173 | -1.09943 |
| 205171_at    | PTPN4                   | protein tyrosine phosphatase, non-receptor type 4 (megakary  | 0.491 | 4.14905 | 5.23961 | -1.09056 |
| 221618_s_at  | TAF9B                   | TAF9B RNA polymerase II, TATA box binding protein (TBP)-ass  | 0.491 | 7.36832 | 8.44639 | -1.07807 |
| 238076_at    | GATAD2B                 | GATA zinc finger domain containing 2B                        | 0.491 | 4.57916 | 5.64276 | -1.0636  |
| 230888_at    | WDR91                   | WD repeat domain 91                                          | 0.491 | 4.52613 | 5.54967 | -1.02354 |
| 200703_at    | DYNLL1                  | dynein, light chain, LC8-type 1                              | 0.491 | 8.20256 | 7.17468 | 1.02788  |
| 48031_r_at   | C5orf4                  | chromosome 5 open reading frame 4                            | 0.491 | 4.39247 | 3.18913 | 1.20334  |
| 206655_s_at  | GP1BB /// SEPT5         | glycoprotein Ib (platelet), beta polypeptide /// septin 5    | 0.491 | 7.64763 | 6.23731 | 1.41032  |
| 206488_s_at  | CD36                    | CD36 molecule (thrombospondin receptor)                      | 0.491 | 8.71709 | 6.74836 | 1.96873  |
| 209348_s_at  | MAF                     | v-maf musculoaponeurotic fibrosarcoma oncogene homolog (     | 0.491 | 4.37681 | 6.38655 | -2.00974 |
| 217591_at    | SKIL                    | SKI-like oncogene                                            | 0.491 | 7.75997 | 9.17926 | -1.41929 |
| 216550_x_at  | ANKRD12                 | ankyrin repeat domain 12                                     | 0.491 | 8.65198 | 10.0382 | -1.38622 |
| 216361_s_at  | MYST3                   | MYST histone acetyltransferase (monocytic leukemia) 3        | 0.491 | 8.20203 | 9.55636 | -1.35433 |
| 230505_at    | LOC145474               | hypothetical protein LOC145474                               | 0.491 | 4.07414 | 5.39715 | -1.32301 |
| 1552634_a_at | ZNF101                  | zinc finger protein 101                                      | 0.491 | 5.94659 | 7.25742 | -1.31083 |
| 234645_at    | ---                     | ---                                                          | 0.491 | 3.59044 | 4.79756 | -1.20712 |
| 240768_x_at  | ---                     | ---                                                          | 0.491 | 4.96098 | 6.11782 | -1.15684 |
| 214748_at    | N4BP2L2                 | NEDD4 binding protein 2-like 2                               | 0.491 | 4.6408  | 5.72659 | -1.08579 |
| 229434_at    | ---                     | ---                                                          | 0.491 | 6.05631 | 7.1407  | -1.08439 |
| 242875_at    | ---                     | ---                                                          | 0.491 | 7.76054 | 8.82743 | -1.06689 |
| 213281_at    | JUN                     | Jun oncogene                                                 | 0.491 | 7.8208  | 8.84482 | -1.02402 |
| 235263_at    | LOC100134711 /// STAG3L | hypothetical protein LOC100134711 /// stromal antigen 3-like | 0.491 | 6.39412 | 7.40214 | -1.00802 |
| 225129_at    | CPNE2                   | copine II                                                    | 0.491 | 7.54823 | 6.52839 | 1.01984  |
| 219099_at    | C12orf5                 | chromosome 12 open reading frame 5                           | 0.491 | 6.15832 | 5.04158 | 1.11674  |
| 224496_s_at  | TMEM107                 | transmembrane protein 107                                    | 0.491 | 4.75146 | 3.55438 | 1.19708  |
| 221260_s_at  | CSRNP2                  | cysteine-serine-rich nuclear protein 2                       | 0.491 | 5.12377 | 3.89212 | 1.23165  |
| 215047_at    | TRIM58                  | tripartite motif-containing 58                               | 0.491 | 3.6895  | 2.42068 | 1.26882  |
| 208601_s_at  | TUBB1                   | tubulin, beta 1                                              | 0.491 | 7.89438 | 6.60077 | 1.29361  |
| 219872_at    | C4orf18                 | chromosome 4 open reading frame 18                           | 0.491 | 5.88527 | 4.44688 | 1.43839  |
| 200602_at    | APP                     | amyloid beta (A4) precursor protein                          | 0.491 | 8.03809 | 6.57952 | 1.45857  |
| 205076_s_at  | MTMR11                  | myotubularin related protein 11                              | 0.491 | 6.64816 | 4.91162 | 1.73654  |
| 219607_s_at  | MS4A4A                  | membrane-spanning 4-domains, subfamily A, member 4           | 0.491 | 4.40373 | 2.42243 | 1.9813   |
| 1553280_at   | PUS10                   | pseudouridylate synthase 10                                  | 0.492 | 5.46915 | 6.49849 | -1.02934 |
| 233694_at    | HSPA1L                  | Heat shock 70kDa protein 1-like                              | 0.492 | 6.40318 | 5.33521 | 1.06797  |
| 231199_at    | ---                     | ---                                                          | 0.493 | 3.41429 | 4.62528 | -1.21099 |
| 219321_at    | MPP5                    | membrane protein, palmitoylated 5 (MAGUK p55 subfamily m     | 0.493 | 5.00381 | 6.39324 | -1.38943 |
| 1559121_s_at | ARIH2                   | Ariadne homolog 2 (Drosophila)                               | 0.493 | 3.63414 | 4.88618 | -1.25204 |
| 210321_at    | GZMH                    | granzyme H (cathepsin G-like 2, protein h-CCPX)              | 0.494 | 6.20239 | 7.85702 | -1.65463 |
| 215889_at    | SKIL                    | SKI-like oncogene                                            | 0.494 | 8.15089 | 9.59404 | -1.44315 |
| 241020_at    | ---                     | ---                                                          | 0.494 | 4.86912 | 6.23297 | -1.36385 |
| 204731_at    | TGFBR3                  | transforming growth factor, beta receptor III                | 0.494 | 4.08643 | 5.40501 | -1.31858 |
| 209189_at    | FOS                     | v-fos FBJ murine osteosarcoma viral oncogene homolog         | 0.494 | 9.70754 | 10.9043 | -1.19676 |
| 239960_x_at  | LYRM7                   | Lym7 homolog (mouse)                                         | 0.494 | 5.47813 | 6.62746 | -1.14933 |
| 207351_s_at  | SH2D2A                  | SH2 domain protein 2A                                        | 0.494 | 4.56821 | 5.67828 | -1.11007 |
| 233564_s_at  | CDADC1                  | cytidine and dCMP deaminase domain containing 1              | 0.494 | 6.62989 | 7.71681 | -1.08692 |
| 243842_at    | ---                     | ---                                                          | 0.494 | 4.93739 | 6.01302 | -1.07563 |
| 225314_at    | OCIAD2                  | OCIA domain containing 2                                     | 0.494 | 5.33281 | 6.38542 | -1.05261 |
| 239163_at    | UBE2B                   | ubiquitin-conjugating enzyme E2B (RAD6 homolog)              | 0.494 | 7.67614 | 8.6963  | -1.02016 |
| 226480_at    | ---                     | ---                                                          | 0.494 | 4.25927 | 5.26551 | -1.00624 |
| 1569238_a_at | ---                     | ---                                                          | 0.494 | 4.19252 | 5.19295 | -1.00043 |
| 213348_at    | CDKN1C                  | cyclin-dependent kinase inhibitor 1C (p57, Kip2)             | 0.494 | 4.23463 | 3.20948 | 1.02515  |
| 231672_at    | CES4                    | Carboxylesterase 4-like                                      | 0.494 | 6.05612 | 5.02061 | 1.03551  |
| 230740_at    | ---                     | ---                                                          | 0.494 | 6.96488 | 5.90246 | 1.06242  |
| 37966_at     | PARVB                   | parvin, beta                                                 | 0.494 | 5.5679  | 4.41834 | 1.14956  |
| 207808_s_at  | PROS1                   | protein S (alpha)                                            | 0.494 | 6.3089  | 5.11185 | 1.19705  |
| 208690_s_at  | PDLIM1                  | PDZ and LIM domain 1                                         | 0.494 | 7.55483 | 6.35426 | 1.20057  |
| 204081_at    | NRGN                    | neurogranin (protein kinase C substrate, RC3)                | 0.494 | 7.49808 | 6.22423 | 1.27385  |
| 204110_at    | HNMT                    | histamine N-methyltransferase                                | 0.494 | 5.39108 | 4.03474 | 1.35634  |
| 201163_s_at  | IGFBP7                  | insulin-like growth factor binding protein 7                 | 0.494 | 7.10961 | 5.75029 | 1.35932  |
| 212460_at    | C14orf147               | chromosome 14 open reading frame 147                         | 0.494 | 4.93751 | 3.56304 | 1.37447  |
| 205307_s_at  | KMO                     | kynurenine 3-monooxygenase (kynurenine 3-hydroxylase)        | 0.494 | 5.39981 | 3.7909  | 1.60891  |
| 203949_at    | MPO                     | myeloperoxidase                                              | 0.494 | 7.58669 | 5.95688 | 1.62981  |
| 207269_at    | DEFA4                   | defensin, alpha 4, corticostatin                             | 0.494 | 8.76718 | 6.53813 | 2.22905  |

|              |                          |                                                                   |       |         |         |          |
|--------------|--------------------------|-------------------------------------------------------------------|-------|---------|---------|----------|
| 241871_at    | CAMK4                    | calcium/calmodulin-dependent protein kinase IV                    | 0.494 | 2.29982 | 3.30113 | -1.00131 |
| 205291_at    | IL2RB                    | interleukin 2 receptor, beta                                      | 0.495 | 5.79676 | 7.52367 | -1.72691 |
| 201103_x_at  | NBPF10 /// NBPF12 /// NB | neuroblastoma breakpoint family, member 10 /// neuroblast         | 0.495 | 8.88519 | 9.96016 | -1.07497 |
| 211842_s_at  | SLC24A1                  | solute carrier family 24 (sodium/potassium/calcium exchange)      | 0.496 | 5.15633 | 7.12972 | -1.97339 |
| 234326_at    | ---                      | ---                                                               | 0.496 | 7.29181 | 8.91696 | -1.62515 |
| 235500_at    | HNRNPC                   | heterogeneous nuclear ribonucleoprotein C (C1/C2)                 | 0.496 | 4.43199 | 5.88765 | -1.45566 |
| 203589_s_at  | TFDP2                    | transcription factor Dp-2 (E2F dimerization partner 2)            | 0.496 | 4.39219 | 5.80182 | -1.40963 |
| 202933_s_at  | YES1                     | v-yes-1 Yamaguchi sarcoma viral oncogene homolog 1                | 0.496 | 5.00068 | 6.40783 | -1.40715 |
| 214923_at    | ATP6V1D                  | ATPase, H+ transporting, lysosomal 34kDa, V1 subunit D            | 0.496 | 5.7608  | 7.13131 | -1.37051 |
| 1558877_at   | ---                      | ---                                                               | 0.496 | 4.93543 | 6.24192 | -1.30649 |
| 235567_at    | RORA                     | RAR-related orphan receptor A                                     | 0.496 | 6.04251 | 7.27481 | -1.2323  |
| 1557519_at   | ---                      | ---                                                               | 0.496 | 6.19744 | 7.35322 | -1.15578 |
| 213376_at    | ZBTB1                    | zinc finger and BTB domain containing 1                           | 0.496 | 6.95128 | 8.06789 | -1.11661 |
| 232174_at    | ---                      | ---                                                               | 0.496 | 4.76616 | 5.87507 | -1.10891 |
| 222122_s_at  | THOC2                    | THO complex 2                                                     | 0.496 | 5.59547 | 6.67786 | -1.08239 |
| 237488_at    | ---                      | ---                                                               | 0.496 | 6.73592 | 7.81282 | -1.0769  |
| 1565888_at   | ---                      | ---                                                               | 0.496 | 5.48354 | 6.53416 | -1.05062 |
| 239296_at    | ---                      | ---                                                               | 0.496 | 5.63042 | 6.66422 | -1.0338  |
| 232943_at    | ---                      | ---                                                               | 0.496 | 4.01996 | 5.03121 | -1.01125 |
| 220254_at    | LRP12                    | low density lipoprotein-related protein 12                        | 0.496 | 4.65111 | 3.63804 | 1.01307  |
| 201004_at    | SSR4                     | signal sequence receptor, delta (translocon-associated protein    | 0.496 | 8.16422 | 7.15101 | 1.01321  |
| 213705_at    | ---                      | ---                                                               | 0.496 | 8.81624 | 7.61848 | 1.19776  |
| 201105_at    | LGALS1                   | lectin, galactoside-binding, soluble, 1                           | 0.496 | 8.46497 | 7.21583 | 1.24914  |
| 201058_s_at  | MYL9                     | myosin, light chain 9, regulatory                                 | 0.496 | 8.12437 | 6.82082 | 1.30355  |
| 210244_at    | CAMP                     | cathelicidin antimicrobial peptide                                | 0.496 | 9.64942 | 8.3086  | 1.34082  |
| 228195_at    | C2orf88                  | chromosome 2 open reading frame 88                                | 0.496 | 6.4496  | 5.04159 | 1.40801  |
| 229778_at    | C12orf39                 | chromosome 12 open reading frame 39                               | 0.496 | 5.39544 | 3.65311 | 1.74233  |
| 202436_s_at  | CYP1B1                   | cytochrome P450, family 1, subfamily B, polypeptide 1             | 0.496 | 7.38651 | 5.57042 | 1.81609  |
| 1555829_at   | FAM62B                   | family with sequence similarity 62 (C2 domain containing) me      | 0.496 | 3.36953 | 5.12718 | -1.75765 |
| 228370_at    | SNRPN                    | small nuclear ribonucleoprotein polypeptide N                     | 0.497 | 4.09631 | 5.66978 | -1.57347 |
| 212599_at    | AUTS2                    | autism susceptibility candidate 2                                 | 0.498 | 3.86801 | 5.64851 | -1.7805  |
| 240013_at    | ---                      | ---                                                               | 0.498 | 6.18737 | 7.71919 | -1.53182 |
| 233284_at    | ---                      | ---                                                               | 0.498 | 5.63184 | 6.9621  | -1.33026 |
| 1565889_at   | ---                      | ---                                                               | 0.498 | 5.12816 | 6.37062 | -1.24246 |
| 229447_x_at  | NBPF10 /// NBPF11 /// NB | neuroblastoma breakpoint family, member 10 /// neuroblast         | 0.498 | 7.1552  | 8.29199 | -1.13679 |
| 1567303_at   | ---                      | ---                                                               | 0.498 | 4.93429 | 6.01823 | -1.08394 |
| 235716_at    | ---                      | ---                                                               | 0.498 | 6.02495 | 7.06379 | -1.03884 |
| 232001_at    | LOC439949                | hypothetical protein LOC439949                                    | 0.499 | 5.01352 | 7.17608 | -2.16256 |
| 213193_x_at  | TRBC1                    | T cell receptor beta constant 1                                   | 0.499 | 6.49036 | 8.60504 | -2.11468 |
| 212402_at    | ZC3H13                   | zinc finger CCCH-type containing 13                               | 0.499 | 5.55511 | 7.04508 | -1.48997 |
| 1556783_a_at | ---                      | ---                                                               | 0.499 | 3.92094 | 5.33659 | -1.41565 |
| 1554036_at   | ZBTB24                   | zinc finger and BTB domain containing 24                          | 0.499 | 6.10896 | 7.47002 | -1.36106 |
| 201027_s_at  | EIF5B                    | eukaryotic translation initiation factor 5B                       | 0.499 | 5.55644 | 6.85349 | -1.29705 |
| 1567304_at   | ---                      | ---                                                               | 0.499 | 4.72483 | 5.95019 | -1.22536 |
| 201104_x_at  | NBPF10 /// NBPF11 /// NB | neuroblastoma breakpoint family, member 10 /// neuroblast         | 0.499 | 6.87961 | 8.07847 | -1.19886 |
| 213612_x_at  | NBPF10 /// NBPF12 /// NB | neuroblastoma breakpoint family, member 10 /// neuroblast         | 0.499 | 8.77707 | 9.91725 | -1.14018 |
| 205376_at    | INPP4B                   | inositol polyphosphate-4-phosphatase, type II, 105kDa             | 0.499 | 2.87866 | 4.01796 | -1.1393  |
| 215378_at    | ---                      | ---                                                               | 0.499 | 6.48095 | 7.59921 | -1.11826 |
| 224833_at    | ETS1                     | v-ets erythroblastosis virus E26 oncogene homolog 1 (avian)       | 0.499 | 8.20578 | 9.31993 | -1.11415 |
| 1560706_at   | ---                      | ---                                                               | 0.499 | 6.6898  | 7.80214 | -1.11234 |
| 216563_at    | ANKRD12                  | Ankyrin repeat domain 12                                          | 0.499 | 10.1577 | 11.2488 | -1.0911  |
| 204835_at    | POLA1                    | polymerase (DNA directed), alpha 1, catalytic subunit             | 0.499 | 4.10421 | 5.1805  | -1.07629 |
| 1555355_a_at | ETS1                     | v-ets erythroblastosis virus E26 oncogene homolog 1 (avian)       | 0.499 | 7.83225 | 8.90031 | -1.06806 |
| 232835_at    | ---                      | ---                                                               | 0.499 | 7.05397 | 8.11107 | -1.0571  |
| 1570021_at   | ---                      | ---                                                               | 0.499 | 3.32692 | 4.37707 | -1.05015 |
| 241289_at    | ---                      | ---                                                               | 0.499 | 3.65044 | 4.70001 | -1.04957 |
| 238987_at    | B4GALT1                  | UDP-Gal:betaGlcNAc beta 1,4- galactosyltransferase, polypept      | 0.499 | 6.05027 | 7.08873 | -1.03846 |
| 218554_s_at  | ASH1L                    | ash1 (absent, small, or homeotic)-like (Drosophila)               | 0.499 | 7.72869 | 8.76292 | -1.03423 |
| 1554287_at   | TRIM4                    | tripartite motif-containing 4                                     | 0.499 | 6.6579  | 7.68103 | -1.02313 |
| 155718_at    | PPP2R5C                  | protein phosphatase 2, regulatory subunit B', gamma isoform       | 0.499 | 4.82274 | 5.83334 | -1.0106  |
| 215524_x_at  | TRA@ /// TRAC /// TRAJ17 | T cell receptor alpha locus /// T cell receptor alpha constant // | 0.499 | 4.29834 | 5.30524 | -1.0069  |
| 235959_at    | ---                      | ---                                                               | 0.499 | 4.42055 | 5.42413 | -1.00358 |
| 215000_s_at  | FEZ2                     | fasciculation and elongation protein zeta 2 (zygin II)            | 0.499 | 8.6003  | 7.58368 | 1.01662  |
| 229618_at    | SNX16                    | sorting nexin 16                                                  | 0.499 | 5.66257 | 4.63701 | 1.02556  |
| 226936_at    | C6orf173                 | chromosome 6 open reading frame 173                               | 0.499 | 5.35187 | 4.25727 | 1.0946   |

|              |                         |                                                                   |       |         |         |          |
|--------------|-------------------------|-------------------------------------------------------------------|-------|---------|---------|----------|
| 204069_at    | MEIS1                   | Meis homeobox 1                                                   | 0.499 | 3.93143 | 2.82295 | 1.10848  |
| 207156_at    | HIST1H2AG               | histone cluster 1, H2ag                                           | 0.499 | 5.2865  | 4.12826 | 1.15824  |
| 224374_s_at  | EMILIN2                 | elastin microfibril interfacier 2                                 | 0.499 | 8.68176 | 7.51269 | 1.16907  |
| 204037_at    | LPAR1                   | lysophosphatidic acid receptor 1                                  | 0.499 | 8.00269 | 6.81781 | 1.18488  |
| 206871_at    | ELANE                   | elastase, neutrophil expressed                                    | 0.499 | 4.53052 | 3.31291 | 1.21761  |
| 208576_s_at  | HIST1H3B                | histone cluster 1, H3b                                            | 0.499 | 6.12636 | 4.90273 | 1.22363  |
| 208791_at    | CLU                     | clusterin                                                         | 0.499 | 7.37414 | 6.14418 | 1.22996  |
| 214516_at    | HIST1H4B                | histone cluster 1, H4b                                            | 0.499 | 8.07614 | 6.79632 | 1.27982  |
| 227432_s_at  | ---                     | ---                                                               | 0.499 | 7.041   | 5.70413 | 1.33687  |
| 204364_s_at  | REEP1                   | receptor accessory protein 1                                      | 0.499 | 4.01187 | 2.6702  | 1.34167  |
| 1555680_a_at | SMOX                    | spermine oxidase                                                  | 0.499 | 6.73894 | 5.36692 | 1.37202  |
| 202437_s_at  | CYP1B1                  | cytochrome P450, family 1, subfamily B, polypeptide 1             | 0.499 | 5.5241  | 3.8707  | 1.6534   |
| 204620_s_at  | VCAN                    | versican                                                          | 0.499 | 7.18302 | 5.42046 | 1.76256  |
| 211745_x_at  | HBA1 /// HBA2           | hemoglobin, alpha 1 /// hemoglobin, alpha 2                       | 0.499 | 11.431  | 9.57573 | 1.85527  |
| 204018_x_at  | HBA1 /// HBA2           | hemoglobin, alpha 1 /// hemoglobin, alpha 2                       | 0.499 | 11.0736 | 9.20617 | 1.86743  |
| 217414_x_at  | HBA1 /// HBA2           | hemoglobin, alpha 1 /// hemoglobin, alpha 2                       | 0.499 | 11.0402 | 9.07442 | 1.96578  |
| 218986_s_at  | DDX60                   | DEAD (Asp-Glu-Ala-Asp) box polypeptide 60                         | 0.499 | 5.52518 | 6.57773 | -1.05255 |
| 209458_x_at  | HBA1 /// HBA2           | hemoglobin, alpha 1 /// hemoglobin, alpha 2                       | 0.499 | 11.3504 | 9.41893 | 1.93147  |
| 211324_s_at  | RGPD5 /// RGPD7         | RANBP2-like and GRIP domain containing 5 /// RANBP2-like ar       | 0.500 | 4.18482 | 5.20391 | -1.01909 |
| 206390_x_at  | PF4                     | platelet factor 4                                                 | 0.500 | 10.0466 | 8.51672 | 1.52988  |
| 201853_s_at  | CDC25B                  | cell division cycle 25 homolog B (S. pombe)                       | 0.500 | 5.95218 | 7.05965 | -1.10747 |
| 1564052_at   | TREML4                  | triggering receptor expressed on myeloid cells-like 4             | 0.501 | 6.91496 | 8.30516 | -1.3902  |
| 224685_at    | MLLT4                   | myeloid/lymphoid or mixed-lineage leukemia (trithorax homo        | 0.501 | 4.77748 | 5.90177 | -1.12429 |
| 223625_at    | FAM126A                 | family with sequence similarity 126, member A                     | 0.501 | 4.82643 | 3.78453 | 1.0419   |
| 1557071_s_at | NUB1                    | negative regulator of ubiquitin-like proteins 1                   | 0.502 | 6.12725 | 7.6056  | -1.47835 |
| 203717_at    | DPP4                    | dipeptidyl-peptidase 4                                            | 0.502 | 3.23602 | 4.50413 | -1.26811 |
| 211699_x_at  | HBA1 /// HBA2           | hemoglobin, alpha 1 /// hemoglobin, alpha 2                       | 0.502 | 11.0232 | 9.07795 | 1.94525  |
| 201084_s_at  | BCLAF1                  | BCL2-associated transcription factor 1                            | 0.503 | 7.31042 | 8.34374 | -1.03332 |
| 201731_s_at  | TPR                     | translocated promoter region (to activated MET oncogene)          | 0.503 | 7.40454 | 8.76856 | -1.36402 |
| 240499_at    | ---                     | ---                                                               | 0.503 | 3.93889 | 5.06186 | -1.12297 |
| 219208_at    | FBXO11                  | F-box protein 11                                                  | 0.503 | 5.10942 | 6.11212 | -1.0027  |
| 231721_at    | JAM3                    | junctional adhesion molecule 3                                    | 0.503 | 5.29509 | 3.98365 | 1.31144  |
| 203680_at    | PRKAR2B                 | protein kinase, cAMP-dependent, regulatory, type II, beta         | 0.503 | 5.50274 | 4.03395 | 1.46879  |
| 234255_at    | ---                     | ---                                                               | 0.505 | 7.04699 | 8.51497 | -1.46798 |
| 232125_at    | ---                     | ---                                                               | 0.505 | 4.89043 | 5.93753 | -1.0471  |
| 203485_at    | RTN1                    | reticulon 1                                                       | 0.505 | 7.72189 | 6.20979 | 1.5121   |
| 217394_at    | ---                     | ---                                                               | 0.505 | 3.30544 | 5.04924 | -1.7438  |
| 210985_s_at  | SP100                   | SP100 nuclear antigen                                             | 0.505 | 6.77837 | 8.38482 | -1.60645 |
| 1559507_at   | LOC100130357            | similar to hCG2038897                                             | 0.505 | 6.53343 | 8.11591 | -1.58248 |
| 217147_s_at  | TRAT1                   | T cell receptor associated transmembrane adaptor 1                | 0.505 | 2.42388 | 3.81311 | -1.38923 |
| 205590_at    | RASGRP1                 | RAS guanyl releasing protein 1 (calcium and DAG-regulated)        | 0.505 | 6.50456 | 7.78108 | -1.27652 |
| 231644_at    | ---                     | ---                                                               | 0.505 | 5.59585 | 6.74882 | -1.15297 |
| 238659_at    | KIAA0141                | KIAA0141                                                          | 0.505 | 6.27309 | 7.28239 | -1.0093  |
| 213982_s_at  | RABGAP1L                | RAB GTPase activating protein 1-like                              | 0.505 | 8.87663 | 7.81941 | 1.05722  |
| 234985_at    | LDLRAD3                 | low density lipoprotein receptor class A domain containing 3      | 0.505 | 5.85408 | 4.58086 | 1.27322  |
| 74694_s_at   | LOC100133585 /// RABEP2 | similar to RABEP2 protein /// rabaptin, RAB GTPase binding ef     | 0.505 | 5.34592 | 4.28937 | 1.05655  |
| 241652_x_at  | ---                     | ---                                                               | 0.505 | 7.35481 | 6.09841 | 1.2564   |
| 244415_at    | ---                     | ---                                                               | 0.505 | 6.22579 | 7.59946 | -1.37367 |
| 219691_at    | SAMD9                   | sterile alpha motif domain containing 9                           | 0.505 | 6.70694 | 7.89461 | -1.18767 |
| 1555068_at   | WNK1                    | WNK lysine deficient protein kinase 1                             | 0.506 | 4.03319 | 5.14247 | -1.10928 |
| 222794_x_at  | MTPAP                   | mitochondrial poly(A) polymerase                                  | 0.506 | 5.45857 | 4.4345  | 1.02407  |
| 219505_at    | CECR1                   | cat eye syndrome chromosome region, candidate 1                   | 0.506 | 8.91324 | 7.58255 | 1.33069  |
| 243759_at    | SFRS15                  | Splicing factor, arginine/serine-rich 15                          | 0.507 | 3.81906 | 5.21629 | -1.39723 |
| 210915_x_at  | TRBC1                   | T cell receptor beta constant 1                                   | 0.507 | 6.80407 | 8.64169 | -1.83762 |
| 1568845_at   | ---                     | ---                                                               | 0.507 | 4.62017 | 6.00052 | -1.38035 |
| 244578_at    | LCP2                    | lymphocyte cytosolic protein 2 (SH2 domain containing leukoc      | 0.507 | 6.08765 | 7.25851 | -1.17086 |
| 211734_s_at  | FCER1A                  | Fc fragment of IgE, high affinity I, receptor for; alpha polypept | 0.507 | 7.49975 | 5.90068 | 1.59907  |
| 200768_s_at  | MAT2A                   | methionine adenosyltransferase II, alpha                          | 0.508 | 8.96248 | 7.93856 | 1.02392  |
| 242405_at    | ---                     | ---                                                               | 0.508 | 5.89838 | 7.57409 | -1.67571 |
| 223725_at    | C3orf42                 | chromosome 3 open reading frame 42                                | 0.508 | 6.70832 | 8.07749 | -1.36917 |
| 232784_at    | ---                     | ---                                                               | 0.508 | 4.31439 | 5.59656 | -1.28217 |
| 239886_at    | ---                     | ---                                                               | 0.508 | 6.87001 | 8.14025 | -1.27024 |
| 206081_at    | SLC24A1                 | solute carrier family 24 (sodium/potassium/calcium exchange)      | 0.508 | 4.45704 | 5.70457 | -1.24753 |
| 230023_at    | NSUN4                   | NOL1/NOP2/Sun domain family, member 4                             | 0.508 | 4.70129 | 5.90958 | -1.20829 |
| 231801_at    | NFATC2                  | nuclear factor of activated T-cells, cytoplasmic, calcineurin-dep | 0.508 | 4.85209 | 6.00164 | -1.14955 |



|             |                 |                                                                  |       |         |         |          |
|-------------|-----------------|------------------------------------------------------------------|-------|---------|---------|----------|
| 225221_at   | ---             | ---                                                              | 0.508 | 6.40137 | 7.54138 | -1.14001 |
| 224227_s_at | BDP1            | B double prime 1, subunit of RNA polymerase III transcription    | 0.508 | 6.38506 | 7.42354 | -1.03848 |
| 218354_at   | TRAPPC2L        | trafficking protein particle complex 2-like                      | 0.508 | 6.14748 | 5.14249 | 1.00499  |
| 201416_at   | SOX4            | SRY (sex determining region Y)-box 4                             | 0.508 | 6.13355 | 4.88038 | 1.25317  |
| 203715_at   | TBCE            | tubulin folding cofactor E                                       | 0.508 | 7.3342  | 5.84777 | 1.48643  |
| 1556055_at  | ---             | ---                                                              | 0.510 | 5.82333 | 7.33639 | -1.51306 |
| 239245_at   | ---             | ---                                                              | 0.510 | 4.47556 | 5.61386 | -1.1383  |
| 222366_at   | ---             | ---                                                              | 0.510 | 3.89943 | 4.99928 | -1.09985 |
| 225579_at   | PQLC3           | PQ loop repeat containing 3                                      | 0.510 | 7.11758 | 5.95697 | 1.16061  |
| 229091_s_at | CCNJ            | cyclin J                                                         | 0.510 | 6.25391 | 4.76907 | 1.48484  |
| 223111_x_at | ARID4B          | AT rich interactive domain 4B (RBP1-like)                        | 0.511 | 8.42621 | 9.7558  | -1.32959 |
| 220577_at   | GVIN1           | GTPase, very large interferon inducible 1                        | 0.511 | 5.25868 | 6.647   | -1.38832 |
| 1556352_at  | ---             | ---                                                              | 0.511 | 5.79964 | 7.15767 | -1.35803 |
| 201529_s_at | RPA1            | replication protein A1, 70kDa                                    | 0.511 | 6.85073 | 5.84878 | 1.00195  |
| 206932_at   | CH25H           | cholesterol 25-hydroxylase                                       | 0.511 | 4.76904 | 3.09635 | 1.67269  |
| 227038_at   | SGMS2           | sphingomyelin synthase 2                                         | 0.512 | 3.98284 | 2.72081 | 1.26203  |
| 221092_at   | IKZF3           | IKAROS family zinc finger 3 (Aiolos)                             | 0.512 | 4.26074 | 5.95847 | -1.69773 |
| 233496_s_at | CFL2            | cofilin 2 (muscle)                                               | 0.512 | 3.84933 | 5.23116 | -1.38183 |
| 232587_at   | EML4            | echinoderm microtubule associated protein like 4                 | 0.512 | 4.32429 | 5.6998  | -1.37551 |
| 230086_at   | FNBP1           | formin binding protein 1                                         | 0.512 | 6.49924 | 7.83125 | -1.33201 |
| 224663_s_at | CFL2            | cofilin 2 (muscle)                                               | 0.512 | 3.84099 | 5.03518 | -1.19419 |
| 239758_at   | ---             | ---                                                              | 0.512 | 4.27742 | 5.42651 | -1.14909 |
| 234492_at   | ---             | ---                                                              | 0.512 | 3.94316 | 5.06027 | -1.11711 |
| 212980_at   | USP34           | ubiquitin specific peptidase 34                                  | 0.512 | 5.05674 | 6.1435  | -1.08676 |
| 212820_at   | DMXL2           | Dmx-like 2                                                       | 0.512 | 7.40617 | 8.46114 | -1.05497 |
| 228613_at   | RAB11FIP3       | RAB11 family interacting protein 3 (class II)                    | 0.512 | 3.85381 | 4.90677 | -1.05296 |
| 214442_s_at | PIAS2           | protein inhibitor of activated STAT, 2                           | 0.512 | 4.26258 | 5.30315 | -1.04057 |
| 201083_s_at | BCLAF1          | BCL2-associated transcription factor 1                           | 0.512 | 6.45869 | 7.47028 | -1.01159 |
| 1561211_at  | ---             | ---                                                              | 0.512 | 4.82319 | 3.70587 | 1.11732  |
| 224983_at   | SCARB2          | scavenger receptor class B, member 2                             | 0.512 | 6.69704 | 5.52047 | 1.17657  |
| 219498_s_at | BCL11A          | B-cell CLL/lymphoma 11A (zinc finger protein)                    | 0.512 | 5.46937 | 4.23651 | 1.23286  |
| 201890_at   | RRM2            | ribonucleotide reductase M2 polypeptide                          | 0.512 | 5.79168 | 4.49338 | 1.2983   |
| 206110_at   | ---             | ---                                                              | 0.512 | 8.20484 | 6.60289 | 1.60195  |
| 214525_x_at | MLH3            | mutL homolog 3 (E. coli)                                         | 0.512 | 8.1631  | 6.51794 | 1.64516  |
| 243361_at   | SFRS12          | splicing factor, arginine/serine-rich 12                         | 0.512 | 3.8498  | 4.98178 | -1.13198 |
| 231695_at   | ---             | ---                                                              | 0.512 | 3.832   | 4.92341 | -1.09141 |
| 1562468_at  | ---             | ---                                                              | 0.512 | 7.13269 | 8.66827 | -1.53558 |
| 216042_at   | TNFRSF25        | tumor necrosis factor receptor superfamily, member 25            | 0.512 | 3.67796 | 4.90933 | -1.23137 |
| 235597_s_at | RGPD1 /// RGPD2 | RANBP2-like and GRIP domain containing 1 /// RANBP2-like ar      | 0.512 | 5.77826 | 6.98059 | -1.20233 |
| 209839_at   | DNM3            | dynamitin 3                                                      | 0.512 | 6.16001 | 4.98374 | 1.17627  |
| 230014_at   | ---             | ---                                                              | 0.513 | 7.67351 | 8.88787 | -1.21436 |
| 226625_at   | TGFBR3          | transforming growth factor, beta receptor III                    | 0.513 | 6.39595 | 7.56414 | -1.16819 |
| 234013_at   | TRD@            | T cell receptor delta locus                                      | 0.513 | 3.96229 | 5.10703 | -1.14474 |
| 205790_at   | SKAP1           | src kinase associated phosphoprotein 1                           | 0.513 | 5.13192 | 6.23749 | -1.10557 |
| 234149_at   | ---             | ---                                                              | 0.513 | 2.44302 | 3.54516 | -1.10214 |
| 223204_at   | C4orf18         | chromosome 4 open reading frame 18                               | 0.513 | 5.12354 | 3.59207 | 1.53147  |
| 235575_at   | ---             | ---                                                              | 0.513 | 3.74439 | 4.85452 | -1.11013 |
| 228617_at   | XAF1            | XIAP associated factor 1                                         | 0.513 | 6.7428  | 8.40578 | -1.66298 |
| 1566446_at  | ---             | ---                                                              | 0.513 | 2.82189 | 4.22472 | -1.40283 |
| 211005_at   | LAT /// SPNS1   | linker for activation of T cells /// spinster homolog 1 (Drosoph | 0.513 | 7.1684  | 8.50116 | -1.33276 |
| 1555225_at  | C1orf43         | chromosome 1 open reading frame 43                               | 0.513 | 6.99158 | 8.17681 | -1.18523 |
| 228766_at   | CD36            | CD36 molecule (thrombospondin receptor)                          | 0.513 | 4.78649 | 3.26028 | 1.52621  |
| 238183_at   | ---             | ---                                                              | 0.513 | 7.77556 | 6.21636 | 1.5592   |
| 1564718_at  | ---             | ---                                                              | 0.514 | 3.50266 | 5.01039 | -1.50773 |
| 229963_at   | BEX5            | brain expressed, X-linked 5                                      | 0.514 | 3.94573 | 5.27776 | -1.33203 |
| 1561129_at  | ---             | ---                                                              | 0.514 | 2.80238 | 4.06588 | -1.2635  |
| 229367_s_at | GIMAP6          | GTPase, IMAP family member 6                                     | 0.514 | 4.71646 | 5.92912 | -1.21266 |
| 211488_s_at | ITGB8           | integrin, beta 8                                                 | 0.514 | 4.93057 | 3.46032 | 1.47025  |
| 212286_at   | ANKRD12         | ankyrin repeat domain 12                                         | 0.514 | 7.67797 | 9.20968 | -1.53171 |
| 205178_s_at | RBBP6           | retinoblastoma binding protein 6                                 | 0.514 | 7.29779 | 8.60938 | -1.31159 |
| 242029_at   | FNDC3B          | Fibronectin type III domain containing 3B                        | 0.514 | 7.26332 | 8.42186 | -1.15854 |
| 1570394_at  | XRN1            | 5'-3' exoribonuclease 1                                          | 0.514 | 7.44824 | 8.54132 | -1.09308 |
| 204198_s_at | RUNX3           | runt-related transcription factor 3                              | 0.514 | 7.51946 | 8.59084 | -1.07138 |
| 223236_at   | CCDC55          | coiled-coil domain containing 55                                 | 0.514 | 6.50747 | 7.57399 | -1.06652 |
| 242182_x_at | ---             | ---                                                              | 0.514 | 5.66575 | 6.72735 | -1.0616  |

|              |                           |                                                                  |       |         |         |          |
|--------------|---------------------------|------------------------------------------------------------------|-------|---------|---------|----------|
| 202784_s_at  | NNT                       | nicotinamide nucleotide transhydrogenase                         | 0.514 | 6.8179  | 5.79942 | 1.01848  |
| 209045_at    | XPNPEP1                   | X-prolyl aminopeptidase (aminopeptidase P) 1, soluble            | 0.514 | 6.16539 | 5.0944  | 1.07099  |
| 214509_at    | HIST1H3I                  | histone cluster 1, H3i                                           | 0.514 | 6.96754 | 5.59169 | 1.37585  |
| 233621_s_at  | ARHGEF12                  | Rho guanine nucleotide exchange factor (GEF) 12                  | 0.514 | 6.3268  | 4.65337 | 1.67343  |
| 223809_at    | RGS18                     | regulator of G-protein signaling 18                              | 0.514 | 10.2057 | 9.18417 | 1.02153  |
| 205033_s_at  | DEFA1 /// DEFA3 /// LOC72 | defensin, alpha 1 /// defensin, alpha 3, neutrophil-specific /// | 0.514 | 13.0044 | 11.7449 | 1.2595   |
| 208994_s_at  | PIIG                      | peptidylprolyl isomerase G (cyclophilin G)                       | 0.514 | 8.73686 | 9.78769 | -1.05083 |
| 225775_at    | TSPAN33                   | tetraspanin 33                                                   | 0.515 | 8.7802  | 7.62796 | 1.15224  |
| 225694_at    | CRKRS                     | Cdc2-related kinase, arginine/serine-rich                        | 0.515 | 7.03812 | 8.09833 | -1.06021 |
| 214470_at    | KLRB1                     | killer cell lectin-like receptor subfamily B, member 1           | 0.517 | 5.12956 | 6.68874 | -1.55918 |
| 205288_at    | CDC14A                    | CDC14 cell division cycle 14 homolog A (S. cerevisiae)           | 0.517 | 4.59893 | 5.64361 | -1.04468 |
| 223106_at    | TMEM14C                   | transmembrane protein 14C                                        | 0.517 | 7.20469 | 6.18735 | 1.01734  |
| 209778_at    | TRIP11                    | thyroid hormone receptor interactor 11                           | 0.518 | 5.43859 | 6.45147 | -1.01288 |
| 1557049_at   | LOC149478                 | Hypothetical protein LOC149478                                   | 0.518 | 5.73286 | 7.10359 | -1.37073 |
| 238480_at    | TTC39C                    | tetratricopeptide repeat domain 39C                              | 0.519 | 4.71749 | 6.30441 | -1.58692 |
| 244433_at    | ---                       | ---                                                              | 0.519 | 4.79493 | 6.09384 | -1.29891 |
| 236935_at    | ---                       | ---                                                              | 0.520 | 5.11198 | 6.19906 | -1.08708 |
| 205095_s_at  | ATP6V0A1                  | ATPase, H+ transporting, lysosomal V0 subunit a1                 | 0.520 | 7.28737 | 6.17526 | 1.11211  |
| 1557450_s_at | WHAMML2                   | WAS protein homolog associated with actin, golgi membranes       | 0.520 | 4.4967  | 3.27363 | 1.22307  |
| 203413_at    | NELL2                     | NEL-like 2 (chicken)                                             | 0.521 | 3.50805 | 4.69758 | -1.18953 |
| 1557797_a_at | ---                       | ---                                                              | 0.521 | 7.6344  | 8.89661 | -1.26221 |
| 1556107_at   | ---                       | ---                                                              | 0.521 | 4.9535  | 6.07229 | -1.11879 |
| 242853_at    | ---                       | ---                                                              | 0.521 | 7.06127 | 8.23662 | -1.17535 |
| 223117_s_at  | USP47                     | ubiquitin specific peptidase 47                                  | 0.521 | 5.78308 | 6.91053 | -1.12745 |
| 1561705_at   | ---                       | ---                                                              | 0.521 | 5.53301 | 6.63255 | -1.09954 |
| 229935_s_at  | MLL                       | Myeloid/lymphoid or mixed-lineage leukemia (trithorax homo       | 0.521 | 4.99699 | 6.07276 | -1.07577 |
| 226740_x_at  | NBPF1                     | Neuroblastoma breakpoint family, member 1                        | 0.521 | 8.8283  | 9.86751 | -1.03921 |
| 244299_at    | ---                       | ---                                                              | 0.521 | 7.09056 | 8.0965  | -1.00594 |
| 1552277_a_at | C9orf30                   | chromosome 9 open reading frame 30                               | 0.522 | 5.64902 | 4.53578 | 1.11324  |
| 218166_s_at  | RSF1                      | remodeling and spacing factor 1                                  | 0.523 | 5.27838 | 6.40966 | -1.13128 |
| 1561813_at   | ---                       | ---                                                              | 0.523 | 4.32377 | 5.422   | -1.09823 |
| 217614_at    | ---                       | ---                                                              | 0.523 | 5.59964 | 6.61566 | -1.01602 |
| 243969_at    | SLC24A4                   | solute carrier family 24 (sodium/potassium/calcium exchange)     | 0.523 | 5.25897 | 4.13701 | 1.12196  |
| 211571_s_at  | VCAN                      | versican                                                         | 0.523 | 8.50202 | 7.09297 | 1.40905  |
| 238604_at    | ---                       | ---                                                              | 0.523 | 4.59393 | 6.14987 | -1.55594 |
| 208792_s_at  | CLU                       | clusterin                                                        | 0.523 | 7.7652  | 6.70578 | 1.05942  |
| 226603_at    | SAMD9L                    | sterile alpha motif domain containing 9-like                     | 0.523 | 7.05167 | 8.1673  | -1.11563 |
| 235457_at    | MAML2                     | mastermind-like 2 (Drosophila)                                   | 0.523 | 4.56795 | 5.62854 | -1.06059 |
| 207426_s_at  | TNFSF4                    | tumor necrosis factor (ligand) superfamily, member 4             | 0.523 | 5.75518 | 4.3357  | 1.41948  |
| 211796_s_at  | TRBC1 /// TRBC2           | T cell receptor beta constant 1 /// T cell receptor beta constan | 0.524 | 7.8627  | 9.72647 | -1.86377 |
| 224367_at    | BEX2                      | brain expressed X-linked 2                                       | 0.524 | 4.52041 | 5.86968 | -1.34927 |
| 205821_at    | KLRK1                     | killer cell lectin-like receptor subfamily K, member 1           | 0.524 | 4.95917 | 6.21813 | -1.25896 |
| 214059_at    | IFI44                     | Interferon-induced protein 44                                    | 0.524 | 3.50131 | 4.7368  | -1.23549 |
| 214670_at    | ZKSCAN1                   | zinc finger with KRAB and SCAN domains 1                         | 0.524 | 5.09767 | 6.29324 | -1.19557 |
| 212672_at    | ATM                       | ataxia telangiectasia mutated                                    | 0.524 | 6.12784 | 7.29479 | -1.16695 |
| 1559362_at   | ---                       | ---                                                              | 0.524 | 3.66564 | 4.8147  | -1.14906 |
| 1556597_a_at | LOC284513                 | hypothetical protein LOC284513                                   | 0.524 | 5.27771 | 6.42259 | -1.14488 |
| 1554037_a_at | ZBTB24                    | zinc finger and BTB domain containing 24                         | 0.524 | 6.05146 | 7.16418 | -1.11272 |
| 225522_at    | AAK1                      | AP2 associated kinase 1                                          | 0.524 | 7.7506  | 8.85113 | -1.10053 |
| 239668_at    | ---                       | ---                                                              | 0.524 | 6.43419 | 7.53276 | -1.09857 |
| 209815_at    | PTCH1                     | patched homolog 1 (Drosophila)                                   | 0.524 | 3.38858 | 4.449   | -1.06042 |
| 244811_at    | PHIP                      | pleckstrin homology domain interacting protein                   | 0.524 | 4.76929 | 5.82949 | -1.0602  |
| 1557384_at   | ZNF131                    | Zinc finger protein 131                                          | 0.524 | 5.25006 | 6.27358 | -1.02352 |
| 238490_at    | KIAA2026                  | KIAA2026                                                         | 0.524 | 5.46531 | 6.48833 | -1.02302 |
| 229871_at    | SAMD4B                    | sterile alpha motif domain containing 4B                         | 0.524 | 3.68706 | 4.70915 | -1.02209 |
| 238774_at    | ---                       | ---                                                              | 0.524 | 2.98887 | 3.99345 | -1.00458 |
| 226662_at    | STX17                     | syntaxin 17                                                      | 0.524 | 5.30786 | 6.30845 | -1.00059 |
| 209266_s_at  | SLC39A8                   | solute carrier family 39 (zinc transporter), member 8            | 0.524 | 5.55967 | 4.53131 | 1.02836  |
| 201251_at    | PKM2                      | pyruvate kinase, muscle                                          | 0.524 | 8.8268  | 7.77037 | 1.05643  |
| 1566472_s_at | RETSAT                    | retinol saturase (all-trans-retinol 13,14-reductase)             | 0.524 | 5.13087 | 4.03383 | 1.09704  |
| 228042_at    | ADPRH                     | ADP-ribosylarginine hydrolase                                    | 0.524 | 7.85049 | 6.67868 | 1.17181  |
| 1553702_at   | ZNF697                    | zinc finger protein 697                                          | 0.524 | 7.20664 | 5.81861 | 1.38803  |
| 206851_at    | RNASE3                    | ribonuclease, RNase A family, 3 (eosinophil cationic protein)    | 0.524 | 7.23765 | 5.77682 | 1.46083  |
| 235295_at    | ---                       | ---                                                              | 0.524 | 5.57965 | 4.06088 | 1.51877  |
| 217216_x_at  | MLH3                      | mutL homolog 3 (E. coli)                                         | 0.524 | 8.00407 | 6.35791 | 1.64616  |

|              |                          |                                                                 |       |         |         |          |
|--------------|--------------------------|-----------------------------------------------------------------|-------|---------|---------|----------|
| 208450_at    | LGALS2                   | lectin, galactoside-binding, soluble, 2                         | 0.524 | 8.46087 | 6.7893  | 1.67157  |
| 223343_at    | MS4A7                    | membrane-spanning 4-domains, subfamily A, member 7              | 0.524 | 6.3596  | 4.10843 | 2.25117  |
| 228495_at    | CCDC75                   | coiled-coil domain containing 75                                | 0.524 | 4.46162 | 5.68542 | -1.2238  |
| 218666_s_at  | STX17                    | syntaxin 17                                                     | 0.524 | 5.79647 | 6.95194 | -1.15547 |
| 215435_at    | ---                      | ---                                                             | 0.524 | 4.42659 | 5.57682 | -1.15023 |
| 1557811_a_at | ---                      | ---                                                             | 0.524 | 4.44791 | 5.50819 | -1.06028 |
| 237949_at    | ---                      | ---                                                             | 0.524 | 6.31397 | 7.37113 | -1.05716 |
| 240052_at    | ITPR1                    | inositol 1,4,5-triphosphate receptor, type 1                    | 0.524 | 3.3886  | 4.40065 | -1.01205 |
| 218332_at    | BEX1                     | brain expressed, X-linked 1                                     | 0.524 | 7.26715 | 5.95698 | 1.31017  |
| 207017_at    | RAB27B                   | RAB27B, member RAS oncogene family                              | 0.524 | 7.98247 | 6.65503 | 1.32744  |
| 204619_s_at  | VCAN                     | versican                                                        | 0.524 | 5.77991 | 4.43407 | 1.34584  |
| 207815_at    | PF4V1                    | platelet factor 4 variant 1                                     | 0.524 | 6.35767 | 4.65142 | 1.70625  |
| 1553626_a_at | C17orf57                 | chromosome 17 open reading frame 57                             | 0.525 | 8.1193  | 6.40445 | 1.71485  |
| 224579_at    | SLC38A1                  | solute carrier family 38, member 1                              | 0.525 | 6.74177 | 8.02588 | -1.28411 |
| 64064_at     | GIMAP5                   | GTPase, IMAP family member 5                                    | 0.525 | 6.75367 | 7.84957 | -1.0959  |
| 243469_at    | ---                      | ---                                                             | 0.525 | 5.86486 | 6.90444 | -1.03958 |
| 235376_at    | ---                      | ---                                                             | 0.525 | 8.04421 | 9.07947 | -1.03526 |
| 215193_x_at  | HLA-DRB1 /// HLA-DRB3 // | major histocompatibility complex, class II, DR beta 1 /// major | 0.525 | 9.9209  | 8.63976 | 1.28114  |
| 213957_s_at  | CEP350                   | centrosomal protein 350kDa                                      | 0.526 | 5.36524 | 6.67364 | -1.3084  |
| 235777_at    | ANKRD44                  | ankyrin repeat domain 44                                        | 0.526 | 5.37947 | 6.64655 | -1.26708 |
| 228611_s_at  | ---                      | ---                                                             | 0.526 | 5.38941 | 6.44435 | -1.05494 |
| 209555_s_at  | CD36                     | CD36 molecule (thrombospondin receptor)                         | 0.526 | 7.00412 | 5.09412 | 1.91     |
| 240928_at    | FCF1                     | FCF1 small subunit (SSU) processome component homolog (S.       | 0.527 | 4.28683 | 5.32095 | -1.03412 |
| 223548_at    | C1orf26                  | chromosome 1 open reading frame 26                              | 0.527 | 5.97205 | 7.02557 | -1.05352 |
| 234574_at    | ---                      | ---                                                             | 0.528 | 5.68799 | 7.02654 | -1.33855 |
| 211828_s_at  | TNIK                     | TRAF2 and NCK interacting kinase                                | 0.528 | 3.8448  | 4.94404 | -1.09924 |
| 1560758_at   | ---                      | ---                                                             | 0.528 | 4.90814 | 3.63959 | 1.26855  |
| 223777_at    | MGC13005                 | hypothetical LOC84771                                           | 0.528 | 5.74113 | 4.44904 | 1.29209  |
| 1555689_at   | CD80                     | CD80 molecule                                                   | 0.528 | 3.87485 | 2.4274  | 1.44745  |
| 202820_at    | AHR                      | aryl hydrocarbon receptor                                       | 0.528 | 6.72153 | 5.54133 | 1.1802   |
| 212783_at    | RBBP6                    | retinoblastoma binding protein 6                                | 0.528 | 6.96938 | 8.14737 | -1.17799 |
| 243954_at    | LOC285286                | hypothetical protein LOC285286                                  | 0.528 | 3.93153 | 4.94433 | -1.0128  |
| 219864_s_at  | RCAN3                    | RCAN family member 3                                            | 0.529 | 5.94692 | 7.78423 | -1.83731 |
| 243499_at    | ---                      | ---                                                             | 0.529 | 3.66354 | 4.81915 | -1.15561 |
| 214560_at    | FPR3                     | formyl peptide receptor 3                                       | 0.529 | 5.24372 | 4.19128 | 1.05244  |
| 217478_s_at  | HLA-DMA                  | major histocompatibility complex, class II, DM alpha            | 0.529 | 7.26118 | 6.07727 | 1.18391  |
| 221731_x_at  | VCAN                     | versican                                                        | 0.529 | 7.17464 | 5.45627 | 1.71837  |
| 241786_at    | ---                      | ---                                                             | 0.529 | 5.71838 | 7.14362 | -1.42524 |
| 203582_s_at  | RAB4A                    | RAB4A, member RAS oncogene family                               | 0.530 | 7.30739 | 6.21648 | 1.09091  |
| 209301_at    | CA2                      | carbonic anhydrase II                                           | 0.530 | 7.21073 | 6.19473 | 1.016    |
| 231791_at    | ASAH2B                   | N-acylsphingosine amidohydrolase (non-lysosomal ceramidase)     | 0.531 | 3.43224 | 5.00699 | -1.57475 |
| 218027_at    | MRPL15                   | mitochondrial ribosomal protein L15                             | 0.531 | 4.89414 | 3.68665 | 1.20749  |
| 242904_x_at  | ---                      | ---                                                             | 0.532 | 7.78267 | 9.02989 | -1.24722 |
| 31874_at     | GAS2L1                   | growth arrest-specific 2 like 1                                 | 0.532 | 5.61568 | 4.46212 | 1.15356  |
| 214808_at    | ---                      | ---                                                             | 0.532 | 7.52948 | 8.81459 | -1.28511 |
| 242106_at    | ---                      | ---                                                             | 0.532 | 4.24799 | 5.47756 | -1.22957 |
| 204622_x_at  | NR4A2                    | nuclear receptor subfamily 4, group A, member 2                 | 0.532 | 6.30955 | 7.52165 | -1.2121  |
| 214673_s_at  | HUWE1                    | HECT, UBA and WWE domain containing 1                           | 0.532 | 6.57854 | 7.67756 | -1.09902 |
| 1558515_at   | ---                      | ---                                                             | 0.532 | 5.21542 | 6.29844 | -1.08302 |
| 209312_x_at  | HLA-DRB1 /// HLA-DRB4 // | major histocompatibility complex, class II, DR beta 1 /// major | 0.532 | 10.7393 | 9.52391 | 1.21539  |
| 201121_s_at  | PGRMC1                   | progesterone receptor membrane component 1                      | 0.533 | 9.68218 | 8.6043  | 1.07788  |
| 1555691_a_at | KLRK1                    | killer cell lectin-like receptor subfamily K, member 1          | 0.534 | 6.85612 | 8.65509 | -1.79897 |
| 223717_s_at  | ACRBP                    | acrosin binding protein                                         | 0.534 | 8.85827 | 7.59167 | 1.2666   |
| 207802_at    | CRISP3                   | cysteine-rich secretory protein 3                               | 0.535 | 7.25529 | 6.2214  | 1.03389  |
| 239835_at    | KBTBD8                   | kelch repeat and BTB (POZ) domain containing 8                  | 0.535 | 5.46891 | 4.37918 | 1.08973  |
| 200762_at    | DPYSL2                   | dihydropyrimidinase-like 2                                      | 0.535 | 8.36305 | 7.18611 | 1.17694  |
| 203685_at    | BCL2                     | B-cell CLL/lymphoma 2                                           | 0.536 | 4.37623 | 5.98387 | -1.60764 |
| 219777_at    | GIMAP6                   | GTPase, IMAP family member 6                                    | 0.536 | 5.14668 | 6.27776 | -1.13108 |
| 210948_s_at  | LEF1                     | lymphoid enhancer-binding factor 1                              | 0.536 | 3.4338  | 4.45411 | -1.02031 |
| 244235_at    | IVNS1ABP                 | influenza virus NS1A binding protein                            | 0.536 | 8.29274 | 9.49448 | -1.20174 |
| 218370_s_at  | S100PBP                  | S100P binding protein                                           | 0.536 | 4.55263 | 5.62406 | -1.07143 |
| 202478_at    | TRIB2                    | tribbles homolog 2 (Drosophila)                                 | 0.538 | 5.48698 | 6.51942 | -1.03244 |
| 1570552_at   | C18orf50                 | chromosome 18 open reading frame 50                             | 0.539 | 5.67316 | 7.06056 | -1.3874  |
| 205488_at    | GZMA                     | granzyme A (granzyme 1, cytotoxic T-lymphocyte-associated s     | 0.539 | 7.5568  | 8.93701 | -1.38021 |
| 216248_s_at  | NR4A2                    | nuclear receptor subfamily 4, group A, member 2                 | 0.539 | 5.10163 | 6.35976 | -1.25813 |

|              |                          |                                                             |       |         |         |          |
|--------------|--------------------------|-------------------------------------------------------------|-------|---------|---------|----------|
| 208073_x_at  | TTC3                     | tetratricopeptide repeat domain 3                           | 0.539 | 5.46064 | 6.70238 | -1.24174 |
| 216226_at    | TAF4B                    | TAF4b RNA polymerase II, TATA box binding protein (TBP)-ass | 0.539 | 3.78724 | 4.9701  | -1.18286 |
| 1562056_at   | ---                      | ---                                                         | 0.539 | 5.38955 | 6.52282 | -1.13327 |
| 1562865_at   | ---                      | ---                                                         | 0.539 | 5.67027 | 6.70405 | -1.03378 |
| 216022_at    | ---                      | ---                                                         | 0.539 | 4.3276  | 5.33098 | -1.00338 |
| 1563327_a_at | CXorf31                  | chromosome X open reading frame 31                          | 0.539 | 5.17931 | 6.18253 | -1.00322 |
| 1555409_a_at | BAGE2 /// BAGE3 /// BAGE | B melanoma antigen family, member 2 /// B melanoma antige   | 0.539 | 5.35684 | 6.35771 | -1.00087 |
| 230833_at    | ACRBP                    | acrosin binding protein                                     | 0.539 | 7.5419  | 6.442   | 1.0999   |
| 213566_at    | RNASE6                   | ribonuclease, RNase A family, k6                            | 0.539 | 9.42561 | 8.3123  | 1.11331  |
| 234759_at    | ---                      | ---                                                         | 0.540 | 4.12391 | 5.16902 | -1.04511 |
| 220657_at    | KLHL11                   | kelch-like 11 (Drosophila)                                  | 0.540 | 5.1778  | 6.18943 | -1.01163 |
| 200965_s_at  | ABLIM1                   | actin binding LIM protein 1                                 | 0.540 | 6.1511  | 7.54814 | -1.39704 |
| 227565_at    | ---                      | ---                                                         | 0.540 | 5.65907 | 6.99986 | -1.34079 |
| 204621_s_at  | NR4A2                    | nuclear receptor subfamily 4, group A, member 2             | 0.540 | 6.32582 | 7.63591 | -1.31009 |
| 203948_s_at  | MPO                      | myeloperoxidase                                             | 0.542 | 4.96599 | 3.7671  | 1.19889  |
| 213524_s_at  | G0S2                     | G0/G1switch 2                                               | 0.542 | 11.663  | 12.9464 | -1.2834  |
| 228962_at    | PDE4D                    | phosphodiesterase 4D, cAMP-specific (phosphodiesterase E3 c | 0.542 | 4.69905 | 6.06073 | -1.36168 |
| 226040_at    | ---                      | ---                                                         | 0.542 | 5.43029 | 6.80731 | -1.37702 |
| 1565656_x_at | ---                      | ---                                                         | 0.542 | 4.2834  | 5.42338 | -1.13998 |
| 1553681_a_at | PRF1                     | perforin 1 (pore forming protein)                           | 0.542 | 5.65095 | 6.78193 | -1.13098 |
| 201137_s_at  | HLA-DPB1                 | major histocompatibility complex, class II, DP beta 1       | 0.543 | 9.44692 | 7.98653 | 1.46039  |
| 235957_at    | GRIP1                    | glutamate receptor interacting protein 1                    | 0.543 | 5.20115 | 6.21153 | -1.01038 |
| 215621_s_at  | IGHD                     | immunoglobulin heavy constant delta                         | 0.544 | 5.27468 | 4.10558 | 1.1691   |
| 211991_s_at  | HLA-DPA1                 | major histocompatibility complex, class II, DP alpha 1      | 0.544 | 8.35458 | 6.96091 | 1.39367  |
| 212998_x_at  | HLA-DQB1                 | major histocompatibility complex, class II, DQ beta 1       | 0.544 | 9.60504 | 8.36446 | 1.24058  |
| 209795_at    | CD69                     | CD69 molecule                                               | 0.545 | 8.04224 | 10.2548 | -2.21256 |
| 1564932_at   | ---                      | ---                                                         | 0.546 | 5.373   | 6.37568 | -1.00268 |
| 211654_x_at  | HLA-DQB1                 | major histocompatibility complex, class II, DQ beta 1       | 0.546 | 8.35218 | 7.33964 | 1.01254  |
| 238762_at    | MTHFD2L                  | methylenetetrahydrofolate dehydrogenase (NADP+ depende      | 0.546 | 6.01281 | 4.76003 | 1.25278  |
| 1556003_a_at | ---                      | ---                                                         | 0.548 | 4.25162 | 5.3471  | -1.09548 |
| 1558569_at   | UNQ6228                  | Hypothetical LOC100131541                                   | 0.548 | 6.37265 | 7.81698 | -1.44433 |
| 233393_at    | ---                      | ---                                                         | 0.548 | 4.95349 | 5.96825 | -1.01476 |
| 222451_s_at  | ZDHHC9                   | zinc finger, DHHC-type containing 9                         | 0.548 | 4.34845 | 5.3537  | -1.00525 |
| 226725_at    | ---                      | ---                                                         | 0.549 | 5.52892 | 7.02651 | -1.49759 |
| 240951_at    | RORA                     | RAR-related orphan receptor A                               | 0.549 | 3.69895 | 4.95112 | -1.25217 |
| 1552318_at   | GIMAP1                   | GTPase, IMAP family member 1                                | 0.550 | 4.53267 | 5.93185 | -1.39918 |
| 215886_x_at  | USP12                    | ubiquitin specific peptidase 12                             | 0.550 | 7.84633 | 6.76809 | 1.07824  |
| 241133_at    | TRBV27                   | T cell receptor beta variable 27                            | 0.550 | 5.94907 | 4.76942 | 1.17965  |
| 226218_at    | IL7R                     | interleukin 7 receptor                                      | 0.551 | 7.26983 | 8.82544 | -1.55561 |
| 202724_s_at  | FOXO1                    | forkhead box O1                                             | 0.551 | 8.11613 | 9.23752 | -1.12139 |
| 233078_at    | API5                     | apoptosis inhibitor 5                                       | 0.551 | 4.21439 | 5.32497 | -1.11058 |
| 242475_at    | ---                      | ---                                                         | 0.551 | 7.53323 | 8.56412 | -1.03089 |
| 214349_at    | ---                      | ---                                                         | 0.551 | 8.99986 | 7.65476 | 1.3451   |
| 240481_at    | ---                      | ---                                                         | 0.551 | 4.82731 | 5.95623 | -1.12892 |
| 224681_at    | GNA12                    | guanine nucleotide binding protein (G protein) alpha 12     | 0.553 | 6.09817 | 4.84593 | 1.25224  |
| 203157_s_at  | GLS                      | glutaminase                                                 | 0.553 | 5.96205 | 6.98772 | -1.02567 |
| 1570567_at   | ---                      | ---                                                         | 0.553 | 3.16671 | 4.30437 | -1.13766 |
| 241855_s_at  | ---                      | ---                                                         | 0.553 | 4.49357 | 5.50407 | -1.0105  |
| 222877_at    | ---                      | ---                                                         | 0.553 | 4.52855 | 3.50482 | 1.02373  |
| 203305_at    | F13A1                    | coagulation factor XIII, A1 polypeptide                     | 0.554 | 7.80995 | 6.64341 | 1.16654  |
| 1557675_at   | RAF1                     | V-raf-1 murine leukemia viral oncogene homolog 1            | 0.554 | 6.38059 | 7.389   | -1.00841 |
| 205249_at    | EGR2                     | early growth response 2                                     | 0.555 | 7.67289 | 8.90611 | -1.23322 |
| 240231_at    | ---                      | ---                                                         | 0.556 | 4.07886 | 5.30154 | -1.22268 |
| 209337_at    | PSIP1                    | PC4 and SFRS1 interacting protein 1                         | 0.556 | 6.29536 | 7.38917 | -1.09381 |
| 206331_at    | CALCLRL                  | calcitonin receptor-like                                    | 0.556 | 3.66659 | 2.63954 | 1.02705  |
| 211776_s_at  | EPB41L3                  | erythrocyte membrane protein band 4.1-like 3                | 0.557 | 5.98523 | 4.62243 | 1.3628   |
| 242607_at    | ---                      | ---                                                         | 0.559 | 6.51471 | 5.50617 | 1.00854  |
| 223344_s_at  | MS4A7                    | membrane-spanning 4-domains, subfamily A, member 7          | 0.559 | 7.05747 | 5.32841 | 1.72906  |
| 203893_at    | TAF9                     | TAF9 RNA polymerase II, TATA box binding protein (TBP)-ass  | 0.559 | 7.83904 | 6.71194 | 1.1271   |
| 243841_at    | SYNE2                    | spectrin repeat containing, nuclear envelope 2              | 0.559 | 6.13891 | 7.50561 | -1.36667 |
| 1557418_at   | ---                      | ---                                                         | 0.559 | 6.24486 | 7.48933 | -1.24447 |
| 228062_at    | NAP1L5                   | nucleosome assembly protein 1-like 5                        | 0.559 | 3.23929 | 4.47057 | -1.23128 |
| 1569020_at   | NEDD9                    | neural precursor cell expressed, developmentally down-regul | 0.559 | 6.45175 | 7.57169 | -1.11994 |
| 204373_s_at  | CEP350                   | centrosomal protein 350kDa                                  | 0.559 | 6.22699 | 7.31351 | -1.08652 |
| 204466_s_at  | SNCA                     | synuclein, alpha (non A4 component of amyloid precursor)    | 0.559 | 7.09114 | 5.84116 | 1.24998  |

|             |                       |                                                                 |       |         |         |          |
|-------------|-----------------------|-----------------------------------------------------------------|-------|---------|---------|----------|
| 202710_at   | BET1                  | blocked early in transport 1 homolog ( <i>S. cerevisiae</i> )   | 0.561 | 6.80705 | 5.75417 | 1.05288  |
| 202435_s_at | CYP1B1                | cytochrome P450, family 1, subfamily B, polypeptide 1           | 0.561 | 5.42212 | 4.33226 | 1.08986  |
| 202887_s_at | DDIT4                 | DNA-damage-inducible transcript 4                               | 0.561 | 10.6306 | 12.2272 | -1.5966  |
| 1554786_at  | CASS4                 | Cas scaffolding protein family member 4                         | 0.562 | 5.99524 | 7.36467 | -1.36943 |
| 203757_s_at | CEACAM6               | carcinoembryonic antigen-related cell adhesion molecule 6 (n    | 0.562 | 5.22844 | 4.09565 | 1.13279  |
| 241191_at   | ---                   | ---                                                             | 0.563 | 5.69362 | 6.92477 | -1.23115 |
| 213534_s_at | PASK                  | PAS domain containing serine/threonine kinase                   | 0.564 | 4.65518 | 5.89937 | -1.24419 |
| 241462_at   | ---                   | ---                                                             | 0.564 | 6.80032 | 5.52153 | 1.27879  |
| 213275_x_at | CTSB                  | cathepsin B                                                     | 0.565 | 8.34312 | 7.33005 | 1.01307  |
| 235009_at   | BOD1L                 | biorientation of chromosomes in cell division 1-like            | 0.567 | 9.95491 | 11.138  | -1.18309 |
| 237119_at   | ---                   | ---                                                             | 0.567 | 4.92691 | 6.18822 | -1.26131 |
| 229155_at   | ---                   | ---                                                             | 0.567 | 6.7646  | 7.94249 | -1.17789 |
| 223836_at   | FGFBP2                | fibroblast growth factor binding protein 2                      | 0.567 | 5.8412  | 6.90956 | -1.06836 |
| 1556332_at  | ---                   | ---                                                             | 0.567 | 6.37559 | 7.44236 | -1.06677 |
| 239742_at   | TULP4                 | Tubby like protein 4                                            | 0.567 | 4.90158 | 5.90337 | -1.00179 |
| 239223_s_at | FBXL20                | F-box and leucine-rich repeat protein 20                        | 0.567 | 7.83316 | 6.76306 | 1.0701   |
| 218711_s_at | SDPR                  | serum deprivation response (phosphatidylserine binding prote    | 0.568 | 8.64513 | 7.58639 | 1.05874  |
| 204115_at   | GNG11                 | guanine nucleotide binding protein (G protein), gamma 11        | 0.568 | 8.42162 | 7.16461 | 1.25701  |
| 240695_at   | ---                   | ---                                                             | 0.568 | 6.21092 | 7.21817 | -1.00725 |
| 237241_at   | ECT2                  | Epithelial cell transforming sequence 2 oncogene                | 0.568 | 5.1097  | 4.05972 | 1.04998  |
| 214414_x_at | HBA1 /// HBA2         | hemoglobin, alpha 1 /// hemoglobin, alpha 2                     | 0.568 | 13.2229 | 12.0235 | 1.1994   |
| 211323_s_at | ITPR1                 | inositol 1,4,5-triphosphate receptor, type 1                    | 0.568 | 6.41967 | 7.43776 | -1.01809 |
| 222062_at   | IL27RA                | interleukin 27 receptor, alpha                                  | 0.570 | 4.50389 | 5.53079 | -1.0269  |
| 33323_r_at  | SFN                   | stratifin                                                       | 0.570 | 6.42863 | 7.97905 | -1.55042 |
| 218805_at   | GIMAP5                | GTPase, IMAP family member 5                                    | 0.571 | 6.81712 | 7.91184 | -1.09472 |
| 215646_s_at | VCAN                  | versican                                                        | 0.571 | 7.99608 | 6.38543 | 1.61065  |
| 217232_x_at | HBB                   | hemoglobin, beta                                                | 0.571 | 13.0313 | 11.9055 | 1.1258   |
| 226436_at   | RASSF4                | Ras association (RalGDS/AF-6) domain family member 4            | 0.571 | 5.87806 | 4.74272 | 1.13534  |
| 1552787_at  | HELB                  | helicase (DNA) B                                                | 0.572 | 5.62341 | 7.06975 | -1.44634 |
| 209813_x_at | TARP                  | TCR gamma alternate reading frame protein                       | 0.572 | 4.79821 | 5.85658 | -1.05837 |
| 211597_s_at | HOPX                  | HOP homeobox                                                    | 0.572 | 4.18507 | 5.25444 | -1.06937 |
| 1558561_at  | HM13                  | histocompatibility (minor) 13                                   | 0.572 | 4.86852 | 5.92891 | -1.06039 |
| 241956_at   | ---                   | ---                                                             | 0.573 | 6.07103 | 7.08279 | -1.01176 |
| 228151_at   | ---                   | ---                                                             | 0.573 | 7.20214 | 6.16752 | 1.03462  |
| 224358_s_at | MS4A7                 | membrane-spanning 4-domains, subfamily A, member 7              | 0.573 | 7.257   | 5.43931 | 1.81769  |
| 1559990_at  | ---                   | ---                                                             | 0.574 | 9.03057 | 10.0328 | -1.00223 |
| 205686_s_at | CD86                  | CD86 molecule                                                   | 0.575 | 4.81775 | 3.78021 | 1.03754  |
| 211696_x_at | HBB                   | hemoglobin, beta                                                | 0.575 | 13.3005 | 12.2556 | 1.0449   |
| 216191_s_at | TRA@ /// TRD@         | T cell receptor alpha locus /// T cell receptor delta locus     | 0.576 | 5.60014 | 7.31019 | -1.71005 |
| 226254_s_at | KIAA1430              | KIAA1430                                                        | 0.576 | 4.7232  | 5.92548 | -1.20228 |
| 206295_at   | IL18                  | interleukin 18 (interferon-gamma-inducing factor)               | 0.576 | 6.29227 | 5.09081 | 1.20146  |
| 208173_at   | IFNB1                 | interferon, beta 1, fibroblast                                  | 0.576 | 5.24072 | 3.79549 | 1.44523  |
| 216493_s_at | IGF2BP3 /// LOC645468 | insulin-like growth factor 2 mRNA binding protein 3 /// similar | 0.576 | 6.21246 | 5.16753 | 1.04493  |
| 1568126_at  | ANXA2                 | annexin A2                                                      | 0.576 | 4.5728  | 3.44435 | 1.12845  |
| 213537_at   | HLA-DPA1              | major histocompatibility complex, class II, DP alpha 1          | 0.579 | 5.82102 | 4.54553 | 1.27549  |
| 230535_s_at | ---                   | ---                                                             | 0.580 | 8.22507 | 7.03068 | 1.19439  |
| 200869_at   | RPL18A /// RPL18AP3   | ribosomal protein L18a /// ribosomal protein L18a pseudogen     | 0.581 | 9.88993 | 8.83683 | 1.0531   |
| 1554929_at  | KIAA0999              | KIAA0999 protein                                                | 0.582 | 4.93941 | 5.95543 | -1.01602 |
| 1562348_at  | LOC400680             | hypothetical gene supported by AK097381; BC040866               | 0.582 | 4.29482 | 5.40683 | -1.11201 |
| 209116_x_at | HBB                   | hemoglobin, beta                                                | 0.582 | 13.2845 | 12.2385 | 1.046    |
| 227954_at   | ITPRIPL2              | inositol 1,4,5-triphosphate receptor interacting protein-like 2 | 0.583 | 6.22338 | 5.03878 | 1.1846   |
| 1560485_at  | HIVP1                 | human immunodeficiency virus type I enhancer binding protei     | 0.583 | 5.1814  | 6.40308 | -1.22168 |
| 219844_at   | C10orf118             | chromosome 10 open reading frame 118                            | 0.583 | 6.402   | 7.482   | -1.08    |
| 206676_at   | CEACAM8               | carcinoembryonic antigen-related cell adhesion molecule 8       | 0.583 | 8.78688 | 7.60611 | 1.18077  |
| 228528_at   | ---                   | ---                                                             | 0.584 | 6.14017 | 7.31371 | -1.17354 |
| 200790_at   | ODC1                  | ornithine decarboxylase 1                                       | 0.584 | 8.3779  | 7.33914 | 1.03876  |
| 212768_s_at | OLFM4                 | olfactomedin 4                                                  | 0.584 | 8.26261 | 6.90867 | 1.35394  |
| 231270_at   | CA13                  | carbonic anhydrase XIII                                         | 0.584 | 5.11158 | 4.04377 | 1.06781  |
| 205816_at   | ITGB8                 | integrin, beta 8                                                | 0.584 | 4.44953 | 3.07189 | 1.37764  |
| 244860_at   | ---                   | ---                                                             | 0.585 | 6.03851 | 7.21865 | -1.18014 |
| 1552381_at  | SRrp35                | serine-arginine repressor protein (35 kDa)                      | 0.585 | 4.30651 | 5.30818 | -1.00167 |
| 208775_at   | XPO1                  | exportin 1 (CRM1 homolog, yeast)                                | 0.586 | 6.22924 | 7.26111 | -1.03187 |
| 1563975_at  | RNF130                | Ring finger protein 130                                         | 0.586 | 5.79527 | 6.89095 | -1.09568 |
| 204057_at   | IRF8                  | interferon regulatory factor 8                                  | 0.586 | 8.04219 | 6.62327 | 1.41892  |
| 230690_at   | TUBB1                 | tubulin, beta 1                                                 | 0.587 | 9.09573 | 8.00261 | 1.09312  |

|              |                        |                                                                   |       |         |         |          |
|--------------|------------------------|-------------------------------------------------------------------|-------|---------|---------|----------|
| 201730_s_at  | TPR                    | translocated promoter region (to activated MET oncogene)          | 0.588 | 7.6846  | 8.85912 | -1.17452 |
| 1569607_s_at | ANKRD20A1 /// ANKRD20A | ankyrin repeat domain 20 family, member A1 /// ankyrin repe       | 0.588 | 3.26035 | 4.34543 | -1.08508 |
| 244414_at    | ---                    | ---                                                               | 0.588 | 5.75654 | 6.83893 | -1.08239 |
| 243096_at    | ---                    | ---                                                               | 0.588 | 7.7554  | 8.78905 | -1.03365 |
| 212651_at    | RHOBTB1                | Rho-related BTB domain containing 1                               | 0.588 | 4.4914  | 3.27662 | 1.21478  |
| 214146_s_at  | PPBP                   | pro-platelet basic protein (chemokine (C-X-C motif) ligand 7)     | 0.588 | 11.3032 | 9.98947 | 1.31373  |
| 204926_at    | INHBA                  | inhibin, beta A                                                   | 0.588 | 5.48386 | 3.84492 | 1.63894  |
| 242471_at    | ---                    | ---                                                               | 0.588 | 4.05238 | 5.27341 | -1.22103 |
| 239379_at    | LRRFIP1                | Leucine rich repeat (in FLII) interacting protein 1               | 0.588 | 6.25842 | 7.35154 | -1.09312 |
| 215806_x_at  | TARP /// TRGC2         | TCR gamma alternate reading frame protein /// T cell receptor     | 0.589 | 5.67197 | 6.69934 | -1.02737 |
| 227195_at    | ZNF503                 | zinc finger protein 503                                           | 0.589 | 6.96961 | 5.507   | 1.46261  |
| 213515_x_at  | HBG1 /// HBG2          | hemoglobin, gamma A /// hemoglobin, gamma G                       | 0.589 | 9.13104 | 7.99837 | 1.13267  |
| 203810_at    | DNAJB4                 | DnaJ (Hsp40) homolog, subfamily B, member 4                       | 0.590 | 4.41815 | 3.19758 | 1.22057  |
| 1552694_at   | SLC2A13                | solute carrier family 2 (facilitated glucose transporter), membe  | 0.590 | 4.8214  | 3.34849 | 1.47291  |
| 215220_s_at  | TPR                    | translocated promoter region (to activated MET oncogene)          | 0.592 | 8.2719  | 9.31924 | -1.04734 |
| 239288_at    | TNIK                   | TRAF2 and NCK interacting kinase                                  | 0.595 | 6.01974 | 7.19856 | -1.17882 |
| 202761_s_at  | SYNE2                  | spectrin repeat containing, nuclear envelope 2                    | 0.596 | 5.33604 | 6.73535 | -1.39931 |
| 212531_at    | LCN2                   | lipocalin 2                                                       | 0.596 | 9.26844 | 7.82236 | 1.44608  |
| 215009_s_at  | SEC31A                 | SEC31 homolog A ( <i>S. cerevisiae</i> )                          | 0.598 | 7.52846 | 8.64824 | -1.11978 |
| 201939_at    | PLK2                   | polo-like kinase 2 ( <i>Drosophila</i> )                          | 0.598 | 4.66153 | 5.80213 | -1.1406  |
| 225327_at    | KIAA1370               | KIAA1370                                                          | 0.598 | 4.98311 | 6.06859 | -1.08548 |
| 222392_x_at  | PERP                   | PERP, TP53 apoptosis effector                                     | 0.598 | 4.40203 | 5.5644  | -1.16237 |
| 205495_s_at  | GNLY                   | granulysin                                                        | 0.599 | 7.41015 | 8.60404 | -1.19389 |
| 232379_at    | SKIL                   | SKI-like oncogene                                                 | 0.599 | 8.42986 | 9.6603  | -1.23044 |
| 234640_x_at  | ---                    | ---                                                               | 0.600 | 5.99473 | 7.36482 | -1.37009 |
| 223027_at    | SNX9                   | sorting nexin 9                                                   | 0.600 | 5.28852 | 4.18399 | 1.10453  |
| 214617_at    | PRF1                   | perforin 1 (pore forming protein)                                 | 0.601 | 7.57992 | 9.07668 | -1.49676 |
| 212382_at    | TCF4                   | transcription factor 4                                            | 0.602 | 6.60346 | 5.45949 | 1.14397  |
| 1560109_s_at | ---                    | ---                                                               | 0.602 | 6.96877 | 8.09569 | -1.12692 |
| 1554283_at   | CCRN4L                 | CCR4 carbon catabolite repression 4-like ( <i>S. cerevisiae</i> ) | 0.604 | 7.55667 | 6.2452  | 1.31147  |
| 233020_at    | ---                    | ---                                                               | 0.605 | 6.01283 | 7.2786  | -1.26577 |
| 230970_at    | ---                    | ---                                                               | 0.605 | 4.90519 | 5.97821 | -1.07302 |
| 202018_s_at  | LTF                    | lactotransferrin                                                  | 0.605 | 10.5535 | 9.33816 | 1.21534  |
| 231925_at    | ---                    | ---                                                               | 0.606 | 5.38671 | 4.32959 | 1.05712  |
| 227180_at    | ELOVL7                 | ELOVL family member 7, elongation of long chain fatty acids (}    | 0.606 | 5.39726 | 4.16046 | 1.2368   |
| 209392_at    | ENPP2                  | ectonucleotide pyrophosphatase/phosphodiesterase 2                | 0.606 | 3.93427 | 4.95302 | -1.01875 |
| 206111_at    | RNASE2                 | ribonuclease, RNase A family, 2 (liver, eosinophil-derived neur   | 0.606 | 9.41214 | 8.28247 | 1.12967  |
| 221211_s_at  | C21orf7                | chromosome 21 open reading frame 7                                | 0.606 | 8.80756 | 7.33315 | 1.47441  |
| 230741_at    | ---                    | ---                                                               | 0.607 | 5.62718 | 3.9902  | 1.63698  |
| 220646_s_at  | KLRF1                  | killer cell lectin-like receptor subfamily F, member 1            | 0.608 | 3.76586 | 4.83867 | -1.07281 |
| 231862_at    | CBX5                   | chromobox homolog 5 (HP1 alpha homolog, <i>Drosophila</i> )       | 0.608 | 6.06057 | 7.34182 | -1.28125 |
| 201063_at    | RCN1                   | reticulocalbin 1, EF-hand calcium binding domain                  | 0.609 | 6.87721 | 5.83746 | 1.03975  |
| 207018_s_at  | RAB27B                 | RAB27B, member RAS oncogene family                                | 0.609 | 6.84396 | 5.70091 | 1.14305  |
| 208146_s_at  | CPVL                   | carboxypeptidase, vitellogenic-like                               | 0.609 | 8.30459 | 6.93786 | 1.36673  |
| 219666_at    | MS4A6A                 | membrane-spanning 4-domains, subfamily A, member 6A               | 0.609 | 7.10895 | 5.83586 | 1.27309  |
| 203414_at    | MMD                    | monocyte to macrophage differentiation-associated                 | 0.610 | 10.2281 | 9.13402 | 1.09408  |
| 212828_at    | SYNJ2                  | synaptojanin 2                                                    | 0.611 | 5.79185 | 6.80926 | -1.01741 |
| 37145_at     | GNLY                   | granulysin                                                        | 0.611 | 7.34719 | 8.56363 | -1.21644 |
| 227792_at    | ITPRIPL2               | inositol 1,4,5-triphosphate receptor interacting protein-like 2   | 0.614 | 7.10105 | 5.98763 | 1.11342  |
| 219956_at    | GALNT6                 | UDP-N-acetyl-alpha-D-galactosamine:polypeptide N-acetylgl         | 0.615 | 4.75605 | 5.77756 | -1.02151 |
| 228913_at    | LOC100190939           | hypothetical LOC100190939                                         | 0.616 | 5.1192  | 3.97336 | 1.14584  |
| 201024_x_at  | EIF5B                  | eukaryotic translation initiation factor 5B                       | 0.619 | 7.95701 | 9.1455  | -1.18849 |
| 231418_at    | ---                    | ---                                                               | 0.619 | 6.40473 | 5.3934  | 1.01133  |
| 1557261_at   | WHAMML1 /// WHAMML2    | WAS protein homolog associated with actin, golgi membranes        | 0.619 | 5.81633 | 4.73349 | 1.08284  |
| 212671_s_at  | HLA-DQA1 /// HLA-DQA2  | major histocompatibility complex, class II, DQ alpha 1 /// majc   | 0.621 | 9.21944 | 7.78691 | 1.43253  |
| 243999_at    | SLFN5                  | schlafen family member 5                                          | 0.622 | 6.12012 | 7.15788 | -1.03776 |
| 222717_at    | SDPR                   | serum deprivation response (phosphatidylserine binding prote      | 0.625 | 7.34929 | 6.12292 | 1.22637  |
| 215111_s_at  | TSC2D1                 | TSC22 domain family, member 1                                     | 0.626 | 8.12501 | 7.053   | 1.07201  |
| 211990_at    | HLA-DPA1               | major histocompatibility complex, class II, DP alpha 1            | 0.626 | 9.34192 | 7.96629 | 1.37563  |
| 204626_s_at  | ITGB3                  | integrin, beta 3 (platelet glycoprotein IIIa, antigen CD61)       | 0.628 | 8.8836  | 7.86533 | 1.01827  |
| 230590_at    | ---                    | ---                                                               | 0.629 | 7.1581  | 8.21002 | -1.05192 |
| 221802_s_at  | KIAA1598               | KIAA1598                                                          | 0.629 | 5.8271  | 4.80975 | 1.01735  |
| 206115_at    | EGR3                   | early growth response 3                                           | 0.631 | 8.14794 | 9.89041 | -1.74247 |
| 234632_x_at  | ---                    | ---                                                               | 0.632 | 5.74583 | 7.30876 | -1.56293 |
| 1561738_at   | ---                    | ---                                                               | 0.632 | 4.97848 | 6.08048 | -1.102   |

|              |          |                                                                              |       |         |         |          |
|--------------|----------|------------------------------------------------------------------------------|-------|---------|---------|----------|
| 205798_at    | IL7R     | interleukin 7 receptor                                                       | 0.632 | 6.44862 | 7.75185 | -1.30323 |
| 217963_s_at  | NGFRAP1  | nerve growth factor receptor (TNFRSF16) associated protein 1                 | 0.633 | 7.88906 | 6.88498 | 1.00408  |
| 209191_at    | TUBB6    | tubulin, beta 6                                                              | 0.633 | 6.83519 | 5.49291 | 1.34228  |
| 1557706_at   | ZHX2     | zinc fingers and homeoboxes 2                                                | 0.633 | 5.17205 | 6.59868 | -1.42663 |
| 207630_s_at  | CREM     | cAMP responsive element modulator                                            | 0.633 | 7.53042 | 8.66176 | -1.13134 |
| 233011_at    | ANXA1    | Annexin A1                                                                   | 0.633 | 5.07482 | 4.04985 | 1.02497  |
| 235086_at    | THBS1    | Thrombospondin 1                                                             | 0.636 | 5.43518 | 6.45509 | -1.01991 |
| 231688_at    | MMP8     | matrix metalloproteinase 8 (neutrophil collagenase)                          | 0.637 | 6.95116 | 5.89947 | 1.05169  |
| 204512_at    | HIVEP1   | human immunodeficiency virus type I enhancer binding protein                 | 0.638 | 7.2298  | 8.38729 | -1.15749 |
| 207362_at    | SLC30A4  | solute carrier family 30 (zinc transporter), member 4                        | 0.638 | 3.45592 | 4.46603 | -1.01011 |
| 1568619_s_at | ITPR1L2  | inositol 1,4,5-triphosphate receptor interacting protein-like 2              | 0.638 | 6.40456 | 5.3653  | 1.03926  |
| 220695_at    | ---      | ---                                                                          | 0.638 | 7.24572 | 6.04333 | 1.20239  |
| 222449_at    | PMEPA1   | prostate transmembrane protein, androgen induced 1                           | 0.640 | 5.41796 | 6.47172 | -1.05376 |
| 1558392_at   | SYNE2    | spectrin repeat containing, nuclear envelope 2                               | 0.640 | 6.18997 | 7.19694 | -1.00697 |
| 202704_at    | TOB1     | transducer of ERBB2, 1                                                       | 0.642 | 6.6246  | 7.64569 | -1.02109 |
| 1559413_at   | TCP11L2  | t-complex 11 (mouse)-like 2                                                  | 0.642 | 7.67225 | 8.70099 | -1.02874 |
| 203023_at    | NOP16    | NOP16 nucleolar protein homolog (yeast)                                      | 0.648 | 5.03974 | 4.03445 | 1.00529  |
| 1560636_a_at | ---      | ---                                                                          | 0.648 | 6.46517 | 7.47407 | -1.0089  |
| 213831_at    | HLA-DQA1 | major histocompatibility complex, class II, DQ alpha 1                       | 0.649 | 6.82397 | 5.25537 | 1.5686   |
| 210427_x_at  | ANXA2    | annexin A2                                                                   | 0.651 | 9.33    | 8.25886 | 1.07114  |
| 227193_at    | ---      | ---                                                                          | 0.652 | 4.42969 | 5.5165  | -1.08681 |
| 231899_at    | ZC3H12C  | zinc finger CCCH-type containing 12C                                         | 0.656 | 5.14066 | 3.97541 | 1.16525  |
| 214073_at    | CTTN     | cortactin                                                                    | 0.657 | 7.1694  | 5.87436 | 1.29504  |
| 1552316_a_at | GIMAP1   | GTPase, IMAP family member 1                                                 | 0.658 | 6.45221 | 7.55461 | -1.1024  |
| 213503_x_at  | ANXA2    | annexin A2                                                                   | 0.662 | 9.21252 | 8.20335 | 1.00917  |
| 230499_at    | ---      | ---                                                                          | 0.663 | 7.10145 | 8.14087 | -1.03942 |
| 206214_at    | PLA2G7   | phospholipase A2, group VII (platelet-activating factor acetylhydrolase)     | 0.666 | 7.4812  | 6.21061 | 1.27059  |
| 1553266_at   | CNOT6L   | CCR4-NOT transcription complex, subunit 6-like                               | 0.666 | 4.6773  | 5.71946 | -1.04216 |
| 235242_at    | ---      | ---                                                                          | 0.673 | 8.22046 | 9.28139 | -1.06093 |
| 1568830_at   | IRAK3    | interleukin-1 receptor-associated kinase 3                                   | 0.680 | 7.30202 | 8.34095 | -1.03893 |
| 216020_at    | IFIH1    | Interferon induced with helicase C domain 1                                  | 0.683 | 6.87649 | 7.99309 | -1.1166  |
| 211138_s_at  | KMO      | kynurenine 3-monooxygenase (kynurenine 3-hydroxylase)                        | 0.683 | 6.32541 | 4.78262 | 1.54279  |
| 227844_at    | FMNL3    | formin-like 3                                                                | 0.683 | 4.68823 | 5.69173 | -1.0035  |
| 234418_x_at  | CD44     | CD44 molecule (Indian blood group)                                           | 0.688 | 5.55459 | 6.75826 | -1.20367 |
| 204385_at    | KYNU     | kynureninase (L-kynurenine hydrolase)                                        | 0.688 | 7.38849 | 6.30931 | 1.07918  |
| 210164_at    | GZMB     | granzyme B (granzyme 2, cytotoxic T-lymphocyte-associated serine protease 2) | 0.688 | 6.17953 | 7.44289 | -1.26336 |
| 1569203_at   | CXCL2    | chemokine (C-X-C motif) ligand 2                                             | 0.689 | 5.62627 | 4.54138 | 1.08489  |
| 1553055_a_at | SLFN5    | schlafen family member 5                                                     | 0.694 | 6.28447 | 7.354   | -1.06953 |
| 216056_at    | CD44     | CD44 molecule (Indian blood group)                                           | 0.696 | 7.54872 | 8.63525 | -1.08653 |
| 205306_x_at  | KMO      | kynurenine 3-monooxygenase (kynurenine 3-hydroxylase)                        | 0.709 | 6.85317 | 5.53343 | 1.31974  |
| 229437_at    | MIRHG2   | microRNA host gene 2 (non-protein coding)                                    | 0.709 | 4.77885 | 3.63738 | 1.14147  |
| 204440_at    | CD83     | CD83 molecule                                                                | 0.712 | 8.68549 | 10.011  | -1.32551 |
| 227140_at    | ---      | ---                                                                          | 0.712 | 7.39059 | 6.27168 | 1.11891  |
| 210662_at    | KYNU     | kynureninase (L-kynurenine hydrolase)                                        | 0.715 | 5.28775 | 4.27613 | 1.01162  |
| 211122_s_at  | CXCL11   | chemokine (C-X-C motif) ligand 11                                            | 0.718 | 4.85918 | 3.6605  | 1.19868  |
| 202643_s_at  | TNFAIP3  | tumor necrosis factor, alpha-induced protein 3                               | 0.726 | 9.15382 | 10.2229 | -1.06908 |
| 214038_at    | CCL8     | chemokine (C-C motif) ligand 8                                               | 0.731 | 6.05597 | 4.99083 | 1.06514  |
| 1563118_at   | ---      | ---                                                                          | 0.740 | 7.28538 | 8.38768 | -1.1023  |
| 209684_at    | RIN2     | Ras and Rab interactor 2                                                     | 0.752 | 8.2729  | 7.20286 | 1.07004  |
