# Supplementary material
Source: PubMed Central journal article supplement (PMC3136804)
Supplement: NIHMS210118-supplement-6.pdf [file NIHMS210118-supplement-6.pdf]

**Supplementary Table 8. Significantly perturbed genes after severe trauma injury.**

| Probeset ID | Gene Symbol | Gene ID | Gene Name                                   | q-value  | Cluster | Shown are log <sub>2</sub> transformed measured expression values |       |        |       |       |       |       |       |
|-------------|-------------|---------|---------------------------------------------|----------|---------|-------------------------------------------------------------------|-------|--------|-------|-------|-------|-------|-------|
|             |             |         |                                             |          |         | Control                                                           |       | Trauma |       |       |       |       |       |
|             |             |         |                                             |          |         | CTRL                                                              | day0  | day1   | day4  | day7  | day14 | day21 | day28 |
| TC1300271   | ABHD13      | 84945   | abhydrolase domain containing 13            | 4.33E-10 | 1       | 6.28                                                              | 7.25  | 7.09   | 6.91  | 6.83  | 6.89  | 6.78  | 6.76  |
| TC0103035   | ABL2        | 27      | v-abl Abelson murine leukemia viral on      | 1.34E-09 | 1       | 4.08                                                              | 4.86  | 4.67   | 4.52  | 4.41  | 4.36  | 4.30  | 4.19  |
| TC1001292   | ABLIM1      | 3983    | actin binding LIM protein 1 /// Actin-bi    | 0.000385 | 1       | 4.07                                                              | 4.46  | 4.10   | 4.21  | 4.21  | 4.19  | 4.13  | 4.16  |
| TC0301103   | ACAA1       | 30      | acetyl-Coenzyme A acyltransferase 1 (p      | 0.000181 | 1       | 5.99                                                              | 6.08  | 6.12   | 6.26  | 6.15  | 6.10  | 6.07  | 5.86  |
| TC1101017   | ACAD8       | 27034   | acyl-Coenzyme A dehydrogenase family        | 0.000394 | 1       | 4.96                                                              | 5.28  | 5.15   | 5.18  | 5.27  | 5.06  | 5.09  | 5.06  |
| TC0103283   | ACBD3       | 64746   | acyl-Coenzyme A binding domain conta        | 7.38E-07 | 1       | 6.31                                                              | 6.88  | 6.82   | 6.89  | 6.79  | 6.84  | 6.87  | 6.90  |
| TC0701489   | ACHE        | 43      | acetylcholinesterase (Yt blood group) //    | 0.000169 | 1       | 4.95                                                              | 5.17  | 5.21   | 5.20  | 5.21  | 5.12  | 5.10  | 5.10  |
| TC0700500   | ACN9        | 57001   | ACN9 homolog (S. cerevisiae)                | 1.28E-30 | 1       | 3.39                                                              | 6.04  | 6.27   | 5.55  | 5.34  | 5.06  | 4.78  | 4.51  |
| TC0X00816   | ACOT9       | 23597   | acyl-CoA thioesterase 9 /// Acyl-coenzy     | 0.000435 | 1       | 5.45                                                              | 5.92  | 5.84   | 5.68  | 5.45  | 5.61  | 5.76  | 5.69  |
| TC0102655   | ACP6        | 51205   | acid phosphatase 6, lysophosphatidic        | 1.79E-17 | 1       | 4.17                                                              | 5.16  | 4.99   | 4.78  | 4.90  | 4.82  | 4.63  | 4.63  |
| TC0401451   | ACSL1       | 2180    | acyl-CoA synthetase long-chain family m     | 2.54E-21 | 1       | 9.80                                                              | 10.78 | 10.68  | 10.42 | 10.22 | 10.16 | 10.02 | 9.94  |
| TC0201137   | ACSL3       | 2181    | acyl-CoA synthetase long-chain family m     | 2.80E-26 | 1       | 4.93                                                              | 6.63  | 6.35   | 5.71  | 5.61  | 5.69  | 5.70  | 5.58  |
| TC0X01151   | ACSL4       | 2182    | acyl-CoA synthetase long-chain family m     | 8.93E-16 | 1       | 7.15                                                              | 8.54  | 8.36   | 8.13  | 7.82  | 7.81  | 7.82  | 7.86  |
| TC0501266   | ACSL6       | 23305   | acyl-CoA synthetase long-chain family m     | 6.13E-05 | 1       | 3.35                                                              | 3.47  | 3.48   | 3.45  | 3.47  | 3.41  | 3.35  | 3.41  |
| TC0103331   | ACTA1       | 58      | actin, alpha 1, skeletal muscle /// Actin   | 0.000124 | 1       | 5.14                                                              | 5.54  | 5.61   | 5.53  | 5.56  | 5.50  | 5.35  | 5.44  |
| TC1500813   | ACTC1       | 70      | actin, alpha, cardiac muscle 1              | 6.04E-05 | 1       | 3.85                                                              | 4.09  | 4.17   | 4.08  | 4.09  | 4.09  | 3.98  | 3.99  |
| TC1701778   | ACTG1       | 71      | actin, gamma 1                              | 3.07E-07 | 1       | 8.31                                                              | 8.84  | 8.96   | 8.83  | 8.93  | 8.79  | 8.64  | 8.61  |
| TC1400260   | ACTR10      | 55860   | actin-related protein 10 homolog (S. ce     | 8.95E-10 | 1       | 5.69                                                              | 6.16  | 6.38   | 6.10  | 5.97  | 6.01  | 6.00  | 5.97  |
| TC1001246   | ACTR1A      | 10121   | ARP1 actin-related protein 1 homolog A      | 6.44E-08 | 1       | 6.55                                                              | 7.24  | 7.17   | 7.13  | 6.95  | 6.90  | 6.90  | 6.86  |
| TC0200299   | ACTR2       | 10097   | ARP2 actin-related protein 2 homolog (      | 2.42E-12 | 1       | 10.51                                                             | 10.81 | 10.89  | 10.82 | 10.76 | 10.75 | 10.72 | 10.70 |
| TC0200608   | ACTR3       | 10096   | ARP3 actin-related protein 3 homolog (      | 1.97E-08 | 1       | 9.44                                                              | 9.60  | 9.78   | 9.66  | 9.60  | 9.62  | 9.55  | 9.55  |
| TC1200344   | ACVR1B      | 91      | activin A receptor, type IB                 | 6.56E-20 | 1       | 4.48                                                              | 5.65  | 5.56   | 5.33  | 5.26  | 5.05  | 5.03  | 4.92  |
| TC0101110   | ADAM15      | 8751    | ADAM metallopeptidase domain 15 ///         | 3.29E-06 | 1       | 5.27                                                              | 5.52  | 5.50   | 5.42  | 5.53  | 5.49  | 5.38  | 5.32  |
| TC0800235   | ADAM9       | 8754    | ADAM metallopeptidase domain 9 (me          | 5.76E-31 | 1       | 4.65                                                              | 6.67  | 6.90   | 6.44  | 6.36  | 5.86  | 5.75  | 5.35  |
| TC0401025   | ADAMTS3     | 9508    | ADAM metallopeptidase with thrombo          | 2.70E-17 | 1       | 2.81                                                              | 3.05  | 3.87   | 3.30  | 3.05  | 2.68  | 2.65  | 2.64  |
| TC0201359   | ADCY3       | 109     | adenylate cyclase 3                         | 5.67E-05 | 1       | 4.49                                                              | 4.71  | 4.85   | 4.85  | 4.89  | 4.72  | 4.63  | 4.56  |
| TC1000574   | ADD3        | 120     | adducin 3 (gamma)                           | 7.15E-12 | 1       | 6.48                                                              | 7.01  | 7.10   | 6.92  | 6.83  | 6.80  | 6.78  | 6.72  |
| TC0401137   | ADH5        | 647346  | // alcohol dehydrogenase 5 (class III), chi | 8.12E-07 | 1       | 4.48                                                              | 5.18  | 5.35   | 5.39  | 5.33  | 5.25  | 5.37  | 5.24  |
| TC1100171   | ADM         | 133     | adrenomedullin                              | 0.000304 | 1       | 5.09                                                              | 5.35  | 5.37   | 5.54  | 5.45  | 5.39  | 5.27  | 5.19  |
| TC2200138   | ADORA2A     | 135     | adenosine A2a receptor /// Adenosine        | 0.000446 | 1       | 5.33                                                              | 5.56  | 5.58   | 5.55  | 5.58  | 5.53  | 5.45  | 5.47  |
| TC1200179   | AEBP2       | 121536  | AE binding protein 2 /// AE binding pro     | 3.94E-06 | 1       | 4.64                                                              | 5.16  | 5.02   | 5.20  | 5.29  | 5.02  | 5.08  | 4.99  |

|           |                                                                 |           |                                          |          |   |       |       |       |       |       |       |       |       |
|-----------|-----------------------------------------------------------------|-----------|------------------------------------------|----------|---|-------|-------|-------|-------|-------|-------|-------|-------|
| TC0401422 | AGA                                                             | 175       | aspartylglucosaminidase                  | 5.72E-10 | 1 | 4.27  | 5.42  | 5.71  | 5.45  | 5.43  | 5.34  | 5.40  | 5.06  |
| TC0500287 | AGGF1                                                           | 55109     | angiogenic factor with G patch and FH/   | 1.29E-10 | 1 | 5.20  | 5.89  | 6.16  | 6.22  | 5.98  | 5.99  | 6.10  | 5.96  |
| TC0100762 | AGL                                                             | 178       | amylase-1, 6-glycosidase, 4-alpha-glucan | 1.39E-07 | 1 | 3.60  | 4.68  | 4.52  | 4.17  | 4.33  | 4.24  | 4.14  | 3.96  |
| TC0901446 | AGPAT2                                                          | 10555     | 1-acylglycerol-3-phosphate O-acyltrans   | 1.60E-09 | 1 | 4.72  | 5.33  | 5.38  | 5.48  | 5.54  | 5.36  | 5.30  | 5.25  |
| TC0601735 | AGPAT4                                                          | 56895     | 1-acylglycerol-3-phosphate O-acyltrans   | 8.12E-07 | 1 | 3.71  | 3.82  | 3.88  | 3.86  | 3.80  | 3.68  | 3.67  | 3.63  |
| TC0800249 | AGPAT6                                                          | 137964    | 1-acylglycerol-3-phosphate O-acyltrans   | 2.54E-24 | 1 | 4.79  | 5.89  | 5.63  | 5.51  | 5.41  | 5.24  | 5.16  | 5.11  |
| TC0400363 | AGPAT9                                                          | 84803     | 1-acylglycerol-3-phosphate O-acyltrans   | 8.29E-17 | 1 | 7.14  | 8.25  | 8.71  | 8.53  | 8.41  | 8.39  | 8.10  | 8.04  |
| TC0901088 | AGTPBP1                                                         | 23287     | ATP/GTP binding protein 1 /// ATP/GTF    | 1.08E-20 | 1 | 8.26  | 8.92  | 9.12  | 8.79  | 8.69  | 8.60  | 8.41  | 8.35  |
| TC0600601 | AIM1                                                            | 202       | absent in melanoma 1 /// Absent in me    | 8.06E-09 | 1 | 6.31  | 6.85  | 7.25  | 6.97  | 6.74  | 6.70  | 6.74  | 6.63  |
| TC1000734 | AKR1C2                                                          | 1646      | aldo-keto reductase family 1, member     | 6.47E-05 | 1 | 2.88  | 3.07  | 3.26  | 3.20  | 3.14  | 3.15  | 3.09  | 3.04  |
| TC1000027 | AKR1C3                                                          | 8644      | aldo-keto reductase family 1, member     | 3.12E-14 | 1 | 2.96  | 3.38  | 3.80  | 3.63  | 3.24  | 3.29  | 3.37  | 3.28  |
| TC0103415 | AKT3                                                            | 10000     | v-akt murine thymoma viral oncogene      | 4.76E-10 | 1 | 3.97  | 4.58  | 4.77  | 5.01  | 4.79  | 4.56  | 4.51  | 4.43  |
| TC0901044 | ALDH1A1                                                         | 216       | aldehyde dehydrogenase 1 family, men     | 1.20E-09 | 1 | 3.20  | 4.20  | 3.89  | 4.08  | 3.82  | 3.55  | 3.41  | 3.56  |
| TC1600328 | ALDOA                                                           | 226       | aldolase A, fructose-bisphosphate        | 9.86E-07 | 1 | 6.95  | 7.45  | 7.39  | 7.49  | 7.45  | 7.29  | 7.21  | 7.22  |
| TC1701169 | ALDOC                                                           | 230       | aldolase C, fructose-bisphosphate        | 6.47E-07 | 1 | 5.09  | 5.03  | 4.89  | 5.48  | 5.14  | 4.93  | 4.98  | 5.00  |
| TC1300065 | ALOX5AP                                                         | 241       | arachidonate 5-lipoxygenase-activating   | 6.40E-09 | 1 | 10.70 | 11.28 | 11.30 | 11.13 | 11.08 | 11.00 | 10.85 | 10.95 |
| TC0100229 | ALPL                                                            | 249       | alkaline phosphatase, liver/bone/kidne   | 3.82E-13 | 1 | 6.69  | 7.99  | 8.48  | 8.68  | 8.39  | 7.99  | 7.81  | 7.47  |
| TC0401027 | ANKRD17                                                         | 26057     | ankyrin repeat domain 17 /// ankyrin r   | 0.000361 | 1 | 6.66  | 7.02  | 6.86  | 6.73  | 6.65  | 6.66  | 6.77  | 6.64  |
| TC1001140 | ANKRD22                                                         | 118932    | ankyrin repeat domain 22                 | 5.02E-16 | 1 | 4.62  | 8.05  | 8.00  | 7.13  | 7.09  | 6.99  | 6.92  | 6.76  |
| TC0501109 | ANKRD34B                                                        | 340120    | ankyrin repeat domain 34B                | 2.63E-12 | 1 | 4.27  | 4.65  | 5.15  | 5.89  | 5.53  | 4.60  | 4.53  | 4.45  |
| TC0401242 | ANKRD50                                                         | 57182     | ankyrin repeat domain 50                 | 7.51E-17 | 1 | 4.05  | 4.96  | 5.08  | 5.06  | 4.75  | 4.47  | 4.51  | 4.27  |
| TC0500991 | ANKRD55                                                         | 79722     | ankyrin repeat domain 55                 | 2.22E-18 | 1 | 3.97  | 4.95  | 5.15  | 5.63  | 5.41  | 4.85  | 4.82  | 4.66  |
| TC0900293 | ANXA1                                                           | 301       | annexin A1 /// Annexin A1 (Annexin-1)    | 2.42E-21 | 1 | 7.15  | 9.00  | 9.28  | 9.14  | 9.08  | 8.87  | 8.86  | 8.49  |
| TC1501009 | ANXA2                                                           | 302       | annexin A2                               | 2.14E-06 | 1 | 4.12  | 4.64  | 4.82  | 5.19  | 4.64  | 4.48  | 4.59  | 4.62  |
| TC0400340 | ANXA3                                                           | 306       | annexin A3 /// Annexin A3 (Annexin-3)    | 3.19E-36 | 1 | 6.93  | 9.80  | 10.01 | 9.63  | 9.62  | 9.36  | 9.09  | 8.63  |
| TC0401231 | ANXA5                                                           | 308       | annexin A5                               | 1.30E-17 | 1 | 7.04  | 8.14  | 8.40  | 8.37  | 8.18  | 8.03  | 7.99  | 7.80  |
| TC0501418 | ANXA6                                                           | 309       | annexin A6 /// Annexin A6 (Annexin-6)    | 7.37E-06 | 1 | 5.09  | 6.08  | 6.00  | 6.21  | 6.26  | 6.03  | 5.96  | 5.71  |
| TC1001068 | ANXA7                                                           | 310       | annexin A7                               | 2.78E-05 | 1 | 6.91  | 7.34  | 7.29  | 7.25  | 7.14  | 7.15  | 7.22  | 7.16  |
| TC1000941 | ANXA8L1 /// AI728113 // annexin A8-like 1 /// annexin A8 /// an | 0.000793  |                                          |          | 1 | 3.91  | 3.95  | 3.99  | 3.91  | 4.07  | 4.03  | 3.92  | 3.88  |
| TC1601236 | AP1G1                                                           | 164       | adaptor-related protein complex 1, gar   | 1.30E-09 | 1 | 6.86  | 7.33  | 7.19  | 7.01  | 6.90  | 6.98  | 6.86  | 6.91  |
| TC0X00787 | AP1S2                                                           | 654127 // | adaptor-related protein complex 1, sig   | 1.12E-13 | 1 | 5.37  | 6.07  | 6.12  | 5.91  | 5.97  | 5.99  | 5.82  | 5.82  |
| TC1700374 | AP2B1                                                           | 163       | adaptor-related protein complex 2, bet   | 1.45E-06 | 1 | 6.52  | 6.91  | 7.06  | 6.94  | 6.78  | 6.68  | 6.66  | 6.63  |
| TC1501185 | AP3B2                                                           | 8120      | adaptor-related protein complex 3, bet   | 1.10E-10 | 1 | 3.26  | 3.36  | 3.95  | 3.90  | 3.66  | 3.37  | 3.28  | 3.27  |
| TC0500405 | AP3S1                                                           | 730730 // | adaptor-related protein complex 3, sig   | 1.05E-19 | 1 | 5.31  | 6.16  | 6.41  | 6.32  | 6.38  | 6.27  | 6.21  | 6.12  |

|           |          |                                                |          |   |       |       |       |       |       |       |       |       |
|-----------|----------|------------------------------------------------|----------|---|-------|-------|-------|-------|-------|-------|-------|-------|
| TC0102561 | AP4B1    | 10717 adaptor-related protein complex 4, bet   | 0.000361 | 1 | 4.30  | 4.40  | 4.50  | 4.45  | 4.51  | 4.38  | 4.38  | 4.30  |
| TC1000124 | APBB1IP  | 54518 amyloid beta (A4) precursor protein-bi   | 0.000375 | 1 | 8.37  | 8.51  | 8.68  | 8.58  | 8.39  | 8.44  | 8.40  | 8.35  |
| TC1800051 | APCDD1   | 147495 adenomatosis polyposis coli down-regl   | 0.00011  | 1 | 4.63  | 4.91  | 4.95  | 4.95  | 4.92  | 4.88  | 4.73  | 4.81  |
| TC1500397 | APH1B    | 83464 anterior pharynx defective 1 homolog f   | 3.59E-13 | 1 | 5.13  | 5.99  | 6.12  | 5.98  | 5.78  | 5.74  | 5.83  | 5.64  |
| TC1100287 | API5     | 8539 apoptosis inhibitor 5 /// Apoptosis inhi  | 0.000337 | 1 | 5.10  | 6.03  | 6.16  | 6.16  | 6.02  | 5.95  | 6.10  | 5.91  |
| TC0102937 | APOA2    | 336 apolipoprotein A-II                        | 1.93E-12 | 1 | 5.12  | 6.04  | 5.89  | 5.79  | 5.78  | 5.74  | 5.46  | 5.31  |
| TC2200285 | APOBEC3H | 164668 apolipoprotein B mRNA editing enzymε    | 8.81E-05 | 1 | 3.89  | 4.13  | 3.98  | 4.01  | 4.20  | 4.04  | 3.76  | 3.82  |
| TC0X00817 | APOO     | 79135 apolipoprotein O /// Apolipoprotein O    | 1.34E-06 | 1 | 3.66  | 4.32  | 4.42  | 4.16  | 4.04  | 4.01  | 4.07  | 3.95  |
| TC1100896 | ARCN1    | 372 archain 1 /// Coatomer subunit delta (I    | 1.54E-05 | 1 | 7.55  | 7.93  | 7.97  | 7.99  | 7.85  | 7.99  | 7.99  | 7.99  |
| TC0301291 | ARF4     | 378 ADP-ribosylation factor 4                  | 1.14E-08 | 1 | 6.31  | 6.93  | 6.93  | 6.83  | 6.78  | 6.80  | 6.74  | 6.79  |
| TC1400214 | ARF6     | 382 ADP-ribosylation factor 6                  | 1.11E-09 | 1 | 5.40  | 6.31  | 6.21  | 6.34  | 6.27  | 6.24  | 6.03  | 6.09  |
| TC2200733 | ARFGAP3  | 26286 ADP-ribosylation factor GTPase activati  | 7.31E-10 | 1 | 6.24  | 7.11  | 7.01  | 6.90  | 6.79  | 6.74  | 6.69  | 6.47  |
| TC0800995 | ARFGEF1  | 10565 ADP-ribosylation factor guanine nucleo   | 8.63E-06 | 1 | 6.66  | 7.26  | 7.17  | 7.17  | 7.31  | 7.25  | 7.18  | 7.01  |
| TC0600720 | ARG1     | 383 arginase, liver /// Arginase-1 (EC 3.5.3.: | 1.18E-24 | 1 | 5.96  | 9.50  | 9.48  | 9.36  | 9.37  | 8.84  | 8.45  | 7.73  |
| TC0601593 | ARHGAP18 | 93663 Rho GTPase activating protein 18 /// Rl  | 8.28E-10 | 1 | 4.71  | 6.17  | 6.24  | 6.13  | 6.11  | 6.20  | 6.20  | 5.95  |
| TC0400368 | ARHGAP24 | 83478 Rho GTPase activating protein 24 /// Rl  | 3.86E-13 | 1 | 4.34  | 5.69  | 5.65  | 5.73  | 5.72  | 5.48  | 5.43  | 5.07  |
| TC0102459 | ARHGAP29 | 9411 Rho GTPase activating protein 29 /// P1   | 8.18E-11 | 1 | 2.44  | 2.70  | 2.75  | 2.58  | 2.54  | 2.48  | 2.46  | 2.44  |
| TC0301281 | ARHGEF3  | 50650 Rho guanine nucleotide exchange factc    | 4.15E-16 | 1 | 5.01  | 5.86  | 5.84  | 5.77  | 5.35  | 5.13  | 5.30  | 5.35  |
| TC0700841 | ARHGEF5  | 7984 Rho guanine nucleotide exchange factc     | 1.10E-07 | 1 | 4.73  | 5.30  | 4.93  | 4.86  | 5.11  | 5.10  | 5.06  | 4.90  |
| TC1300279 | ARHGEF7  | 8874 Rho guanine nucleotide exchange factc     | 7.27E-09 | 1 | 4.51  | 4.79  | 4.75  | 4.67  | 4.57  | 4.52  | 4.53  | 4.51  |
| TC0200494 | ARID5A   | 10865 AT rich interactive domain 5A (MRF1-lil  | 1.38E-10 | 1 | 4.59  | 5.18  | 5.01  | 4.97  | 4.93  | 4.80  | 4.75  | 4.72  |
| TC1000274 | ARID5B   | 84159 AT rich interactive domain 5B (MRF1-lil  | 7.64E-20 | 1 | 4.00  | 5.45  | 5.85  | 6.26  | 5.70  | 5.10  | 5.17  | 4.70  |
| TC1500459 | ARIH1    | 25820 ariadne homolog, ubiquitin-conjugatinε   | 8.66E-05 | 1 | 6.91  | 7.19  | 6.99  | 7.02  | 6.92  | 7.05  | 7.06  | 7.08  |
| TC1300146 | ARL11    | 115761 ADP-ribosylation factor-like 11         | 5.02E-06 | 1 | 5.40  | 5.97  | 5.95  | 5.84  | 5.74  | 5.87  | 5.74  | 5.73  |
| TC0300414 | ARL13B   | 200894 ADP-ribosylation factor-like 13B        | 4.29E-08 | 1 | 4.32  | 5.17  | 5.04  | 4.92  | 4.81  | 4.84  | 5.05  | 4.92  |
| TC1001248 | ARL3     | 403 ADP-ribosylation factor-like 3             | 0.000127 | 1 | 6.53  | 6.59  | 6.96  | 7.07  | 6.78  | 6.79  | 6.71  | 6.70  |
| TC1000091 | ARL5B    | 221079 ADP-ribosylation factor-like 5B         | 9.26E-12 | 1 | 5.01  | 6.07  | 5.68  | 5.51  | 5.37  | 5.60  | 5.60  | 5.58  |
| TC0103123 | ARL8A    | 127829 ADP-ribosylation factor-like 8A         | 9.11E-08 | 1 | 6.50  | 7.24  | 7.26  | 7.20  | 7.06  | 6.87  | 6.74  | 6.71  |
| TC0300013 | ARL8B    | 55207 ADP-ribosylation factor-like 8B          | 2.03E-14 | 1 | 5.45  | 6.33  | 6.45  | 6.41  | 6.41  | 6.41  | 6.37  | 6.24  |
| TC0300651 | ARMC8    | 25852 armadillo repeat containing 8            | 2.05E-05 | 1 | 6.14  | 6.69  | 6.76  | 6.76  | 6.70  | 6.65  | 6.61  | 6.50  |
| TC0X00430 | ARMCX3   | 51566 armadillo repeat containing, X-linked 3  | 4.28E-08 | 1 | 4.21  | 4.65  | 4.66  | 4.51  | 4.56  | 4.48  | 4.47  | 4.40  |
| TC0102732 | ARNT     | 405 aryl hydrocarbon receptor nuclear tran     | 0.000652 | 1 | 6.90  | 7.36  | 7.28  | 7.33  | 7.20  | 7.14  | 7.21  | 7.13  |
| TC0201090 | ARPC2    | 10109 actin related protein 2/3 complex, sub   | 0.000876 | 1 | 10.28 | 10.34 | 10.43 | 10.32 | 10.27 | 10.31 | 10.31 | 10.29 |
| TC0103062 | ARPC5    | 10092 actin related protein 2/3 complex, sub   | 2.63E-15 | 1 | 9.45  | 9.78  | 9.92  | 9.82  | 9.76  | 9.75  | 9.71  | 9.69  |

|           |                              |        |                                                                       |          |   |      |      |      |      |      |      |      |      |
|-----------|------------------------------|--------|-----------------------------------------------------------------------|----------|---|------|------|------|------|------|------|------|------|
| TC0900560 | ARPC5L                       | 81873  | actin related protein 2/3 complex, subunit 5                          | 1.30E-05 | 1 | 4.84 | 5.24 | 5.35 | 5.23 | 5.23 | 5.01 | 5.11 | 4.89 |
| TC1700047 | ARRB2                        | 409    | arrestin, beta 2 /// Beta-arrestin-2 (Arr2)                           | 0.000114 | 1 | 8.95 | 9.42 | 9.41 | 9.40 | 9.30 | 9.10 | 8.95 | 9.06 |
| TC0201228 | ASB1                         | 51665  | ankyrin repeat and SOCS box-containing protein 1                      | 4.32E-15 | 1 | 4.87 | 5.32 | 5.47 | 5.37 | 5.33 | 5.16 | 5.10 | 4.95 |
| TC1500672 | ASB7                         | 140460 | ankyrin repeat and SOCS box-containing protein 7                      | 4.32E-08 | 1 | 6.41 | 7.07 | 7.12 | 7.11 | 6.90 | 6.99 | 6.87 | 6.87 |
| TC1001055 | ASCC1                        | 51008  | activating signal cointegrator 1 complex subunit 1                    | 9.77E-07 | 1 | 4.60 | 4.91 | 4.88 | 4.80 | 4.81 | 4.80 | 4.76 | 4.79 |
| TC0701441 | ASNS                         | 440    | asparagine synthetase                                                 | 6.11E-16 | 1 | 3.85 | 4.66 | 4.55 | 4.37 | 4.44 | 4.28 | 4.18 | 4.09 |
| TC0800969 | ASPH                         | 444    | aspartate beta-hydroxylase /// Aspartate aminohydroxylase             | 5.63E-15 | 1 | 6.47 | 7.25 | 7.84 | 7.59 | 7.43 | 7.28 | 7.27 | 6.84 |
| TC2200156 | ASPHD2                       | 57168  | aspartate beta-hydroxylase domain containing protein 2                | 1.11E-05 | 1 | 5.42 | 5.97 | 5.87 | 5.95 | 5.83 | 5.96 | 5.92 | 6.02 |
| TC0201369 | ASXL2                        | 55252  | additional sex combs like 2 (Drosophila)                              | 4.09E-05 | 1 | 6.91 | 7.38 | 7.22 | 7.04 | 6.92 | 6.94 | 7.07 | 6.94 |
| TC1001135 | ATAD1                        | 84896  | ATPase family, AAA domain containing protein 1                        | 1.81E-08 | 1 | 4.46 | 5.08 | 5.17 | 4.90 | 4.85 | 4.88 | 4.91 | 4.82 |
| TC0201350 | ATAD2B                       | 54454  | ATPase family, AAA domain containing protein 2B                       | 1.22E-06 | 1 | 5.23 | 5.62 | 5.51 | 5.39 | 5.21 | 5.27 | 5.29 | 5.21 |
| TC1001321 | ATE1                         | 11101  | arginyltransferase 1 /// Arginyl-tRNA--transferase 1                  | 5.22E-08 | 1 | 4.12 | 4.77 | 4.83 | 4.89 | 4.97 | 4.88 | 4.79 | 4.62 |
| TC1201254 | ATF7                         | 11016  | activating transcription factor 7 /// Cyclophilin G                   | 1.90E-07 | 1 | 6.19 | 6.59 | 6.61 | 6.65 | 6.67 | 6.45 | 6.51 | 6.37 |
| TC0500313 | ATG10                        | 83734  | ATG10 autophagy related 10 homolog A (Atg10)                          | 8.28E-05 | 1 | 3.72 | 4.09 | 4.29 | 4.21 | 4.06 | 4.10 | 4.15 | 4.08 |
| TC0301447 | ATG3                         | 64422  | ATG3 autophagy related 3 homolog (S. cerevisiae)                      | 4.30E-05 | 1 | 9.24 | 9.62 | 9.62 | 9.57 | 9.48 | 9.67 | 9.66 | 9.67 |
| TC0X00486 | ATG4A                        | 115201 | ATG4 autophagy related 4 homolog A (Atg4A)                            | 6.80E-06 | 1 | 4.05 | 4.48 | 4.68 | 4.51 | 4.34 | 4.43 | 4.51 | 4.38 |
| TC1900176 | ATG4D                        | 84971  | ATG4 autophagy related 4 homolog D (Atg4D)                            | 0.000638 | 1 | 4.89 | 5.03 | 4.98 | 4.91 | 4.93 | 4.90 | 4.87 | 4.82 |
| TC0601490 | ATG5                         | 9474   | ATG5 autophagy related 5 homolog (S. cerevisiae)                      | 0.000862 | 1 | 5.36 | 5.82 | 5.96 | 5.88 | 5.81 | 5.88 | 5.96 | 5.87 |
| TC0202331 | ATG9A /// ABC79065 /// ATG9A | 79065  | ATG9 autophagy related 9 homolog A (Atg9A)                            | 2.21E-12 | 1 | 4.79 | 5.00 | 4.90 | 4.91 | 4.95 | 4.80 | 4.70 | 4.65 |
| TC1101505 | ATL3 /// ATLA3               | 25923  | atlastin 3 /// Atlastin-3. [Source:UniProtKB/Swiss-Prot]              | 3.02E-23 | 1 | 3.80 | 4.95 | 5.15 | 5.04 | 4.90 | 4.66 | 4.54 | 4.29 |
| TC0300836 | ATP11B                       | 23200  | ATPase, class VI, type 11B                                            | 3.50E-29 | 1 | 7.54 | 9.00 | 9.18 | 8.83 | 8.56 | 8.33 | 8.30 | 8.06 |
| TC0301867 | ATP13A3                      | 79572  | ATPase type 13A3 /// Probable cation-transporting ATPase              | 1.14E-17 | 1 | 4.38 | 6.35 | 6.43 | 6.58 | 6.37 | 5.95 | 5.77 | 5.13 |
| TC0300675 | ATP1B3                       | 483    | ATPase, Na+/K+ transporting, beta 3 polypeptide                       | 4.30E-05 | 1 | 3.47 | 4.02 | 3.63 | 3.76 | 3.82 | 3.74 | 3.79 | 3.63 |
| TC1200691 | ATP2A2                       | 488    | ATPase, Ca++ transporting, cardiac muscle, slow twitch                | 3.61E-14 | 1 | 4.86 | 5.64 | 5.81 | 5.72 | 5.71 | 5.36 | 5.42 | 5.13 |
| TC0101436 | ATP2B4                       | 493    | ATPase, Ca++ transporting, plasma membrane                            | 1.50E-11 | 1 | 6.28 | 7.06 | 7.39 | 7.22 | 6.85 | 6.71 | 6.67 | 6.39 |
| TC1600635 | ATP2C2                       | 9914   | ATPase, Ca++ transporting, type 2C, membrane                          | 8.38E-10 | 1 | 3.71 | 4.60 | 4.08 | 4.00 | 4.29 | 4.14 | 4.05 | 3.80 |
| TC1000044 | ATP5C1                       | 509    | ATP synthase, H+ transporting, mitochondrial F1F0 complex, c1 subunit | 5.87E-15 | 1 | 5.63 | 6.43 | 6.78 | 6.80 | 6.69 | 6.67 | 6.69 | 6.62 |
| TC0100835 | ATP5F1                       | 515    | ATP synthase, H+ transporting, mitochondrial F1F0 complex, c1 subunit | 4.59E-16 | 1 | 5.42 | 6.14 | 6.35 | 6.20 | 6.12 | 6.02 | 6.01 | 5.94 |
| TC0202118 | ATP5G3                       | 518    | ATP synthase, H+ transporting, mitochondrial F1F0 complex, c1 subunit | 2.52E-13 | 1 | 3.47 | 4.32 | 4.58 | 4.60 | 4.57 | 4.52 | 4.52 | 4.37 |
| TC2100318 | ATP5O                        | 539    | ATP synthase, H+ transporting, mitochondrial F1F0 complex, c1 subunit | 2.31E-10 | 1 | 6.01 | 6.53 | 6.70 | 6.63 | 6.68 | 6.64 | 6.67 | 6.60 |
| TC0X00151 | ATP6AP2                      | 10159  | ATPase, H+ transporting, lysosomal acid phosphatase type 6A           | 2.30E-13 | 1 | 6.68 | 7.54 | 7.43 | 7.22 | 7.19 | 7.25 | 7.19 | 7.21 |
| TC0800478 | ATP6V1C1                     | 528    | ATPase, H+ transporting, lysosomal acid phosphatase type 6A           | 9.67E-25 | 1 | 7.30 | 8.59 | 9.13 | 8.70 | 8.38 | 8.29 | 8.13 | 7.99 |
| TC0201486 | ATP6V1E2                     | 90423  | ATPase, H+ transporting, lysosomal acid phosphatase type 6A           | 0.000977 | 1 | 3.29 | 3.42 | 3.53 | 3.59 | 3.53 | 3.43 | 3.50 | 3.40 |
| TC0800935 | ATP6V1H                      | 51606  | ATPase, H+ transporting, lysosomal acid phosphatase type 6A           | 1.20E-07 | 1 | 4.49 | 5.11 | 5.09 | 5.06 | 4.97 | 4.95 | 5.02 | 4.93 |

|            |               |        |                                           |          |   |      |      |      |      |      |      |      |      |
|------------|---------------|--------|-------------------------------------------|----------|---|------|------|------|------|------|------|------|------|
| TC2000834  | ATP9A         | 10079  | ATPase, class II, type 9A /// Probable pl | 6.14E-26 | 1 | 3.57 | 5.62 | 5.93 | 5.38 | 5.12 | 4.54 | 4.24 | 3.88 |
| TC0102227  | ATPAF1        | 64756  | ATP synthase mitochondrial F1 comple:     | 1.86E-07 | 1 | 4.36 | 4.90 | 5.12 | 4.91 | 4.79 | 4.77 | 4.79 | 4.72 |
| TC0600969  | ATXN1 /// Q96 | 6310   | ataxin 1 /// ATXN1 protein (Fragment).    | 7.49E-13 | 1 | 6.01 | 6.57 | 6.73 | 6.69 | 6.42 | 6.31 | 6.23 | 6.11 |
| TC1401078  | ATXN3         | 4287   | ataxin 3 /// ataxin 3 isoform 2 [Source:l | 2.72E-05 | 1 | 6.63 | 7.14 | 7.27 | 7.10 | 6.98 | 7.13 | 7.17 | 7.05 |
| TC0701537  | ATXN7L1       | 222255 | ataxin 7-like 1 /// Ataxin-7-like protein | 0.000126 | 1 | 4.65 | 4.89 | 5.08 | 5.06 | 4.93 | 4.98 | 5.04 | 4.97 |
| TC01r00008 | AURKAIP1      | 54998  | aurora kinase A interacting protein 1     | 1.36E-05 | 1 | 6.83 | 7.12 | 7.20 | 7.21 | 7.16 | 7.15 | 7.15 | 7.16 |
| TC2000510  | AVP           | 551    | arginine vasopressin (neurophysin II, ar  | 0.000455 | 1 | 3.94 | 4.16 | 4.20 | 4.16 | 4.16 | 4.22 | 3.94 | 4.07 |
| TC0301116  | AXUD1         | 64651  | AXIN1 up-regulated 1 /// Axin-1 up-reg    | 1.83E-05 | 1 | 5.43 | 6.07 | 5.81 | 5.79 | 5.72 | 5.80 | 5.55 | 5.71 |
| TC0301075  | AZI2          | 64343  | 5-azacytidine induced 2 /// 5-azacytidir  | 2.78E-20 | 1 | 5.09 | 6.54 | 6.55 | 6.38 | 6.30 | 6.09 | 6.05 | 5.88 |
| TC0801173  | AZIN1         | 51582  | antizyme inhibitor 1                      | 4.01E-24 | 1 | 6.56 | 8.37 | 8.24 | 7.78 | 7.90 | 7.90 | 7.61 | 7.61 |
| TC0301711  | B3GALNT1      | 8706   | beta-1,3-N-acetylgalactosaminyltransfe    | 5.32E-07 | 1 | 3.52 | 3.85 | 3.83 | 3.66 | 3.71 | 3.78 | 3.64 | 3.61 |
| TC0600308  | B3GALT4       | 8705   | UDP-Gal:betaGlcNAc beta 1,3-galactos)     | 2.85E-12 | 1 | 6.01 | 6.70 | 6.83 | 6.80 | 6.79 | 6.63 | 6.57 | 6.53 |
| TC0601378  | B3GAT2        | 135152 | beta-1,3-glucuronyltransferase 2 (glucu   | 7.59E-05 | 1 | 4.88 | 5.10 | 5.27 | 5.21 | 5.14 | 5.17 | 5.20 | 5.15 |
| TC1101478  | B3GAT3        | 26229  | beta-1,3-glucuronyltransferase 3 (glucu   | 0.000335 | 1 | 5.73 | 5.80 | 6.00 | 5.86 | 5.85 | 5.79 | 5.78 | 5.79 |
| TC0200277  | B3GNT2        | 10678  | UDP-GlcNAc:betaGal beta-1,3-N-acetyl      | 1.56E-21 | 1 | 6.18 | 7.23 | 7.64 | 7.54 | 7.40 | 7.39 | 7.18 | 7.11 |
| TC1900308  | B3GNT3        | 10331  | UDP-GlcNAc:betaGal beta-1,3-N-acetyl      | 9.46E-06 | 1 | 3.76 | 4.17 | 4.05 | 4.18 | 4.10 | 3.99 | 3.96 | 3.99 |
| TC0300837  | B3GNT5        | 84002  | UDP-GlcNAc:betaGal beta-1,3-N-acetyl      | 3.43E-18 | 1 | 5.10 | 6.44 | 5.99 | 5.76 | 5.60 | 5.58 | 5.56 | 5.55 |
| TC0301472  | B4GALT4       | 8702   | UDP-Gal:betaGlcNAc beta 1,4- galactos     | 8.38E-13 | 1 | 3.66 | 4.39 | 4.27 | 4.12 | 4.15 | 4.03 | 4.08 | 3.91 |
| TC2000820  | B4GALT5       | 9334   | UDP-Gal:betaGlcNAc beta 1,4- galactos     | 1.02E-21 | 1 | 8.67 | 9.74 | 9.58 | 9.76 | 9.77 | 9.69 | 9.55 | 9.39 |
| TC0800228  | BAG4          | 9530   | BCL2-associated athanogene 4              | 1.17E-08 | 1 | 4.37 | 4.92 | 5.17 | 5.16 | 5.11 | 5.05 | 5.06 | 4.89 |
| TC0701446  | BAIAP2L1      | 55971  | BAI1-associated protein 2-like 1          | 0.000425 | 1 | 3.79 | 3.82 | 3.90 | 3.95 | 3.93 | 3.84 | 3.78 | 3.76 |
| TC0202292  | BARD1         | 580    | BRCA1 associated RING domain 1            | 1.42E-06 | 1 | 3.92 | 4.55 | 4.86 | 4.91 | 5.11 | 4.98 | 4.75 | 4.42 |
| TC0500061  | BASP1         | 10409  | brain abundant, membrane attached si      | 1.44E-08 | 1 | 8.96 | 9.41 | 9.47 | 9.40 | 9.31 | 9.32 | 9.26 | 9.21 |
| TC1400380  | BATF          | 10538  | basic leucine zipper transcription factor | 4.70E-22 | 1 | 5.83 | 7.73 | 7.74 | 7.74 | 7.64 | 7.15 | 7.05 | 6.66 |
| TC1400784  | BAZ1A         | 11177  | bromodomain adjacent to zinc finger d     | 0.000562 | 1 | 9.17 | 9.50 | 9.45 | 9.30 | 9.19 | 9.11 | 9.23 | 9.09 |
| TC0401234  | BBS7          | 55212  | Bardet-Biedl syndrome 7                   | 0.000913 | 1 | 3.24 | 3.54 | 3.65 | 3.61 | 3.57 | 3.56 | 3.69 | 3.58 |
| TC0X01369  | BCAP31        | 10134  | B-cell receptor-associated protein 31     | 6.75E-07 | 1 | 5.86 | 6.28 | 6.44 | 6.40 | 6.36 | 6.22 | 6.12 | 6.12 |
| TC1501158  | BCL2A1        | 597    | BCL2-related protein A1 /// Bcl-2-relate  | 7.26E-22 | 1 | 8.24 | 9.33 | 9.42 | 9.08 | 8.93 | 8.92 | 8.88 | 8.95 |
| TC1400099  | BCL2L2        | 599    | BCL2-like 2                               | 0.000574 | 1 | 5.20 | 5.45 | 5.43 | 5.46 | 5.48 | 5.44 | 5.41 | 5.35 |
| TC1900615  | BCL3          | 602    | B-cell CLL/lymphoma 3                     | 6.89E-11 | 1 | 6.12 | 7.00 | 6.56 | 6.53 | 6.50 | 6.51 | 6.35 | 6.42 |
| TC0701318  | BCL7B         | 9275   | B-cell CLL/lymphoma 7B                    | 0.000547 | 1 | 5.32 | 5.71 | 5.72 | 5.70 | 5.77 | 5.76 | 5.68 | 5.66 |
| TC0100953  | BCL9          | 607    | B-cell CLL/lymphoma 9                     | 1.17E-05 | 1 | 4.34 | 4.70 | 4.67 | 4.59 | 4.61 | 4.44 | 4.50 | 4.44 |
| TC0X00560  | BCORL1        | 63035  | BCL6 co-repressor-like 1 /// BCL6 co-re   | 3.26E-05 | 1 | 5.51 | 5.99 | 5.97 | 5.97 | 5.96 | 5.79 | 5.81 | 5.72 |
| TC1600193  | BFAR          | 51283  | bifunctional apoptosis regulator          | 3.47E-07 | 1 | 5.26 | 6.02 | 5.96 | 6.01 | 5.99 | 6.01 | 5.96 | 5.85 |

|           |           |        |                                          |          |   |      |      |      |      |      |      |      |      |
|-----------|-----------|--------|------------------------------------------|----------|---|------|------|------|------|------|------|------|------|
| TC2000895 | BHLHB4    | 128408 | basic helix-loop-helix domain containin  | 0.000907 | 1 | 5.18 | 5.52 | 5.49 | 5.52 | 5.46 | 5.43 | 5.36 | 5.42 |
| TC2200338 | BIK       | 638    | BCL2-interacting killer (apoptosis-induc | 5.81E-09 | 1 | 4.42 | 5.01 | 4.88 | 4.86 | 4.93 | 4.81 | 4.81 | 4.75 |
| TC0201011 | BMPR2     | 659    | bone morphogenetic protein receptor,     | 4.76E-07 | 1 | 4.86 | 5.69 | 5.59 | 5.69 | 5.35 | 5.48 | 5.78 | 5.77 |
| TC0X00059 | BMX       | 660    | BMX non-receptor tyrosine kinase         | 1.96E-23 | 1 | 4.26 | 7.18 | 6.82 | 6.29 | 6.09 | 5.92 | 5.67 | 5.41 |
| TC1501008 | BNIP2     | 663    | BCL2/adenovirus E1B 19kDa interactin     | 8.32E-27 | 1 | 7.54 | 8.48 | 8.53 | 8.33 | 8.17 | 8.14 | 8.01 | 7.96 |
| TC0103241 | BPNT1     | 10380  | 3'(2'), 5'-bisphosphate nucleotidase 1 / | 3.40E-05 | 1 | 3.74 | 4.20 | 4.32 | 4.25 | 4.34 | 4.14 | 4.22 | 4.08 |
| TC0701689 | BRAF      | 673    | v-raf murine sarcoma viral oncogene ho   | 3.34E-06 | 1 | 6.83 | 7.31 | 7.00 | 6.89 | 6.93 | 6.99 | 6.89 | 6.96 |
| TC0200138 | BRE       | 9577   | brain and reproductive organ-express     | 2.36E-07 | 1 | 5.57 | 5.97 | 5.99 | 5.88 | 5.80 | 5.76 | 5.72 | 5.67 |
| TC1900072 | BRUNOL5   | 60680  | bruno-like 5, RNA binding protein (Dro   | 0.000136 | 1 | 4.36 | 4.44 | 4.47 | 4.38 | 4.44 | 4.43 | 4.26 | 4.36 |
| TC1000639 | BRWD2     | 55717  | bromodomain and WD repeat domain         | 0.000872 | 1 | 3.62 | 4.28 | 4.22 | 4.21 | 4.19 | 4.10 | 4.22 | 4.10 |
| TC0400114 | BST1      | 683    | bone marrow stromal cell antigen 1 ///   | 5.64E-12 | 1 | 7.53 | 8.29 | 8.39 | 8.37 | 8.22 | 8.04 | 7.86 | 7.90 |
| TC1101215 | BTBD10    | 84280  | BTB (POZ) domain containing 10           | 3.28E-05 | 1 | 6.97 | 7.47 | 7.78 | 7.58 | 7.48 | 7.62 | 7.50 | 7.47 |
| TC1900228 | BTBD14B   | 112939 | BTB (POZ) domain containing 14B          | 7.23E-09 | 1 | 5.91 | 6.53 | 6.41 | 6.54 | 6.43 | 6.36 | 6.23 | 6.27 |
| TC2000079 | BTBD3     | 22903  | BTB (POZ) domain containing 3            | 6.04E-09 | 1 | 3.61 | 3.99 | 3.93 | 3.93 | 3.97 | 3.86 | 3.87 | 3.81 |
| TC0100721 | BTBD8     | 284697 | BTB (POZ) domain containing 8 /// BTB,   | 1.16E-05 | 1 | 2.31 | 2.47 | 2.71 | 2.57 | 2.41 | 2.44 | 2.42 | 2.43 |
| TC0200982 | BZW1      | 9689   | basic leucine zipper and W2 domains 1    | 5.46E-05 | 1 | 6.83 | 7.37 | 7.24 | 7.29 | 7.24 | 7.30 | 7.28 | 7.29 |
| TC1001315 | C10orf119 | 79892  | chromosome 10 open reading frame 11      | 5.73E-14 | 1 | 6.50 | 7.28 | 7.40 | 7.46 | 7.36 | 7.34 | 7.23 | 7.16 |
| TC1000055 | C10orf47  | 254427 | chromosome 10 open reading frame 47      | 0.00066  | 1 | 4.80 | 5.02 | 5.00 | 5.02 | 5.05 | 5.07 | 4.99 | 4.97 |
| TC1000381 | C10orf57  | 80195  | chromosome 10 open reading frame 57      | 4.36E-06 | 1 | 3.38 | 3.73 | 3.85 | 3.73 | 3.80 | 3.69 | 3.72 | 3.59 |
| TC1000514 | C10orf6   | 55719  | chromosome 10 open reading frame 6       | 1.46E-05 | 1 | 3.96 | 4.49 | 4.73 | 4.53 | 4.44 | 4.42 | 4.52 | 4.24 |
| TC1001240 | C10orf76  | 79591  | chromosome 10 open reading frame 76      | 0.00076  | 1 | 4.61 | 5.02 | 5.10 | 5.02 | 5.01 | 4.89 | 4.95 | 4.81 |
| TC1101637 | C11orf51  | 25906  | chromosome 11 open reading frame 51      | 3.08E-19 | 1 | 6.14 | 7.67 | 7.70 | 7.81 | 7.84 | 7.59 | 7.40 | 7.07 |
| TC1100198 | C11orf58  | 651744 | // chromosome 11 open reading frame 58   | 7.71E-08 | 1 | 6.13 | 6.85 | 6.82 | 6.62 | 6.53 | 6.59 | 6.64 | 6.61 |
| TC1101848 | C11orf71  | 54494  | chromosome 11 open reading frame 71      | 2.18E-07 | 1 | 4.90 | 5.37 | 5.55 | 5.52 | 5.44 | 5.41 | 5.22 | 5.16 |
| TC1100725 | C11orf73  | 51501  | chromosome 11 open reading frame 73      | 8.91E-06 | 1 | 3.90 | 4.60 | 4.75 | 4.51 | 4.58 | 4.54 | 4.63 | 4.39 |
| TC1100712 | C11orf82  | 220042 | chromosome 11 open reading frame 82      | 5.13E-10 | 1 | 3.87 | 4.39 | 4.81 | 4.75 | 4.68 | 4.56 | 4.40 | 4.24 |
| TC1200031 | C12orf5   | 57103  | chromosome 12 open reading frame 5       | 0.000752 | 1 | 2.75 | 3.05 | 3.12 | 3.17 | 2.98 | 3.03 | 2.97 | 3.14 |
| TC1300414 | C13orf23  | 80209  | chromosome 13 open reading frame 23      | 2.92E-15 | 1 | 4.38 | 6.80 | 6.67 | 6.17 | 6.07 | 5.82 | 5.88 | 5.45 |
| TC1400272 | C14orf100 | 51528  | chromosome 14 open reading frame 100     | 7.30E-06 | 1 | 5.45 | 5.52 | 5.93 | 5.83 | 5.64 | 5.68 | 5.76 | 5.75 |
| TC1400253 | C14orf101 | 54916  | chromosome 14 open reading frame 101     | 6.84E-21 | 1 | 4.95 | 6.11 | 6.41 | 5.88 | 5.58 | 5.44 | 5.44 | 5.20 |
| TC1400257 | C14orf108 | 55745  | chromosome 14 open reading frame 108     | 1.59E-10 | 1 | 3.95 | 4.44 | 4.79 | 4.60 | 4.41 | 4.46 | 4.53 | 4.47 |
| TC1400095 | C14orf119 | 55017  | chromosome 14 open reading frame 119     | 1.15E-09 | 1 | 4.81 | 5.38 | 5.65 | 5.74 | 5.65 | 5.61 | 5.60 | 5.47 |
| TC1400478 | C14orf129 | 51527  | chromosome 14 open reading frame 129     | 1.12E-08 | 1 | 4.86 | 5.78 | 5.97 | 5.78 | 5.66 | 5.69 | 5.59 | 5.55 |
| TC1400778 | C14orf147 | 171546 | chromosome 14 open reading frame 147     | 7.35E-18 | 1 | 4.88 | 6.19 | 6.58 | 7.08 | 7.09 | 6.55 | 6.26 | 5.87 |

|           |           |                                                     |          |   |      |      |       |      |      |      |      |      |
|-----------|-----------|-----------------------------------------------------|----------|---|------|------|-------|------|------|------|------|------|
| TC1400394 | C14orf174 | 161394 chromosome 14 open reading frame 1           | 0.000107 | 1 | 2.96 | 3.19 | 3.34  | 3.30 | 3.16 | 3.00 | 3.21 | 3.02 |
| TC1401151 | C14orf2   | 9556 chromosome 14 open reading frame 2             | 3.48E-26 | 1 | 7.66 | 8.45 | 8.67  | 8.59 | 8.62 | 8.51 | 8.46 | 8.33 |
| TC1400167 | C14orf24  | 283635 chromosome 14 open reading frame 24          | 2.49E-10 | 1 | 5.48 | 6.41 | 6.24  | 6.01 | 6.09 | 6.05 | 6.04 | 5.88 |
| TC1401103 | C14orf49  | 161176 chromosome 14 open reading frame 49          | 2.79E-05 | 1 | 4.92 | 5.11 | 5.16  | 5.02 | 4.98 | 4.95 | 4.94 | 4.93 |
| TC1400709 | C14orf94  | 54930 chromosome 14 open reading frame 94           | 3.00E-08 | 1 | 7.18 | 7.57 | 8.23  | 8.03 | 7.70 | 7.76 | 7.83 | 7.47 |
| TC1500970 | C15orf15  | 730628 // chromosome 15 open reading frame 15       | 2.54E-26 | 1 | 5.87 | 7.59 | 7.71  | 7.52 | 7.74 | 7.61 | 7.46 | 7.27 |
| TC1500538 | C15orf37  | 283687 chromosome 15 open reading frame 37          | 1.11E-10 | 1 | 6.40 | 7.52 | 7.20  | 6.71 | 6.62 | 6.61 | 6.60 | 6.83 |
| TC1501235 | C15orf38  | /// AI348110 // chromosome 15 open reading frame 38 | 5.35E-14 | 1 | 5.24 | 5.60 | 5.80  | 5.87 | 5.79 | 5.57 | 5.53 | 5.43 |
| TC1600320 | C16orf53  | 79447 chromosome 16 open reading frame 53           | 1.55E-13 | 1 | 6.61 | 7.22 | 7.36  | 7.31 | 7.31 | 7.32 | 7.31 | 7.26 |
| TC1600484 | C16orf57  | 79650 chromosome 16 open reading frame 57           | 4.63E-11 | 1 | 6.31 | 7.16 | 7.30  | 7.37 | 7.12 | 7.01 | 6.86 | 6.75 |
| TC1600229 | C16orf62  | 57020 chromosome 16 open reading frame 62           | 5.72E-09 | 1 | 4.48 | 4.87 | 5.12  | 5.15 | 5.08 | 4.90 | 4.99 | 4.81 |
| TC1601352 | C16orf7   | 9605 chromosome 16 open reading frame 7             | 1.49E-07 | 1 | 4.80 | 5.17 | 5.06  | 4.97 | 4.96 | 4.91 | 4.81 | 4.86 |
| TC1600511 | C16orf70  | 80262 chromosome 16 open reading frame 70           | 7.24E-20 | 1 | 5.05 | 5.40 | 5.88  | 6.05 | 5.87 | 5.64 | 5.47 | 5.33 |
| TC1600163 | C16orf72  | 29035 chromosome 16 open reading frame 72           | 5.59E-05 | 1 | 8.70 | 9.01 | 9.08  | 9.11 | 8.96 | 8.99 | 8.81 | 8.85 |
| TC1601074 | C16orf87  | 388272 chromosome 16 open reading frame 87          | 1.38E-09 | 1 | 3.80 | 5.26 | 5.00  | 4.95 | 4.71 | 4.78 | 5.03 | 4.75 |
| TC1701207 | C17orf42  | 79736 chromosome 17 open reading frame 42           | 1.66E-05 | 1 | 3.41 | 3.55 | 3.82  | 3.67 | 3.61 | 3.57 | 3.65 | 3.48 |
| TC1700159 | C17orf45  | /// SI 125144 chromosome 17 open reading frame 45   | 1.87E-06 | 1 | 4.16 | 5.00 | 4.68  | 4.64 | 4.96 | 4.84 | 4.72 | 4.46 |
| TC1700689 | C17orf60  | 284021 chromosome 17 open reading frame 60          | 8.25E-07 | 1 | 4.91 | 6.44 | 6.68  | 6.33 | 6.07 | 6.04 | 6.12 | 5.84 |
| TC1701180 | C17orf63  | 55731 chromosome 17 open reading frame 63           | 1.06E-08 | 1 | 5.23 | 5.92 | 5.42  | 5.45 | 5.43 | 5.44 | 5.45 | 5.40 |
| TC1701217 | C17orf75  | 64149 chromosome 17 open reading frame 75           | 9.87E-05 | 1 | 3.42 | 3.79 | 3.99  | 3.91 | 3.98 | 3.87 | 3.96 | 3.81 |
| TC1701214 | C17orf79  | 55352 chromosome 17 open reading frame 79           | 6.18E-07 | 1 | 4.56 | 4.91 | 4.94  | 4.92 | 5.05 | 4.93 | 4.95 | 4.86 |
| TC1701782 | C17orf90  | 339229 chromosome 17 open reading frame 90          | 4.42E-06 | 1 | 5.88 | 6.22 | 6.27  | 6.29 | 6.39 | 6.24 | 6.17 | 6.13 |
| TC1800072 | C18orf1   | 753 chromosome 18 open reading frame 1              | 7.51E-14 | 1 | 4.46 | 4.64 | 4.81  | 4.59 | 4.60 | 4.54 | 4.44 | 4.46 |
| TC1800142 | C18orf21  | 83608 chromosome 18 open reading frame 21           | 9.00E-10 | 1 | 5.57 | 6.00 | 6.37  | 6.30 | 6.22 | 6.19 | 6.23 | 6.19 |
| TC1800375 | C18orf45  | 85019 chromosome 18 open reading frame 45           | 1.34E-06 | 1 | 3.20 | 3.43 | 3.44  | 3.31 | 3.44 | 3.39 | 3.27 | 3.26 |
| TC1900037 | C19orf24  | 55009 chromosome 19 open reading frame 24           | 0.000153 | 1 | 6.21 | 6.53 | 6.56  | 6.50 | 6.58 | 6.52 | 6.46 | 6.45 |
| TC1901018 | C19orf35  | 374872 chromosome 19 open reading frame 35          | 0.000168 | 1 | 5.80 | 6.33 | 6.22  | 6.12 | 6.14 | 6.08 | 6.03 | 6.03 |
| TC1900135 | C19orf59  | 199675 chromosome 19 open reading frame 59          | 1.57E-40 | 1 | 5.45 | 9.72 | 10.04 | 9.46 | 9.16 | 8.28 | 7.74 | 7.14 |
| TC0201582 | C1D       | 647375 // nuclear DNA-binding protein               | 2.94E-09 | 1 | 5.07 | 5.89 | 6.13  | 6.01 | 5.80 | 5.92 | 5.90 | 5.94 |
| TC0700064 | C1GALT1   | 56913 core 1 synthase, glycoprotein-N-acetylgl      | 6.72E-09 | 1 | 5.50 | 6.48 | 6.53  | 6.31 | 6.29 | 6.37 | 6.37 | 6.37 |
| TC0X01202 | C1GALT1C1 | 29071 C1GALT1-specific chaperone 1                  | 9.57E-15 | 1 | 5.33 | 5.89 | 6.26  | 6.03 | 5.95 | 5.95 | 5.84 | 5.93 |
| TC0100412 | C1orf108  | 79647 chromosome 1 open reading frame 108           | 0.000244 | 1 | 6.76 | 7.03 | 6.96  | 6.96 | 6.90 | 7.06 | 6.92 | 7.00 |
| TC0101528 | C1orf115  | 79762 chromosome 1 open reading frame 115           | 3.28E-05 | 1 | 3.92 | 4.14 | 4.05  | 4.05 | 4.03 | 3.97 | 3.82 | 3.99 |
| TC0102005 | C1orf135  | 79000 chromosome 1 open reading frame 135           | 7.03E-12 | 1 | 4.44 | 4.98 | 4.95  | 5.04 | 5.10 | 5.01 | 4.99 | 4.93 |

|           |          |                                             |          |   |      |      |      |      |      |      |      |      |
|-----------|----------|---------------------------------------------|----------|---|------|------|------|------|------|------|------|------|
| TC0100836 | C1orf162 | 128346 chromosome 1 open reading frame 162  | 2.20E-31 | 1 | 5.98 | 7.85 | 8.14 | 7.88 | 7.62 | 7.19 | 7.19 | 6.94 |
| TC0102941 | C1orf192 | 257177 chromosome 1 open reading frame 192  | 5.54E-05 | 1 | 4.17 | 4.36 | 4.39 | 4.51 | 4.29 | 4.21 | 4.16 | 4.04 |
| TC0102098 | C1orf212 | 113444 chromosome 1 open reading frame 212  | 4.76E-06 | 1 | 6.12 | 6.46 | 6.57 | 6.48 | 6.40 | 6.36 | 6.29 | 6.40 |
| TC0103070 | C1orf25  | 81627 chromosome 1 open reading frame 25    | 5.39E-06 | 1 | 5.38 | 5.85 | 6.09 | 6.00 | 5.77 | 5.86 | 5.87 | 5.89 |
| TC0102506 | C1orf59  | 113802 chromosome 1 open reading frame 59   | 1.25E-09 | 1 | 4.92 | 5.27 | 5.60 | 5.35 | 5.21 | 5.15 | 5.14 | 5.01 |
| TC0101494 | C1orf97  | 84791 chromosome 1 open reading frame 97    | 0.000105 | 1 | 3.51 | 4.09 | 4.08 | 3.93 | 3.80 | 3.99 | 3.97 | 3.97 |
| TC2000299 | C2orf121 | 79183 chromosome 20 open reading frame 121  | 3.22E-09 | 1 | 4.84 | 5.63 | 5.52 | 5.53 | 5.56 | 5.46 | 5.38 | 5.24 |
| TC2000419 | C2orf177 | 63939 chromosome 20 open reading frame 177  | 9.42E-19 | 1 | 6.16 | 7.40 | 7.37 | 7.01 | 6.96 | 6.85 | 6.71 | 6.61 |
| TC2000057 | C2orf196 | 149840 chromosome 20 open reading frame 196 | 0.000106 | 1 | 4.73 | 5.46 | 5.39 | 5.29 | 5.41 | 5.37 | 5.45 | 5.21 |
| TC2000633 | C2orf3   | 57136 chromosome 20 open reading frame 3    | 6.51E-14 | 1 | 7.58 | 8.95 | 8.71 | 8.92 | 8.97 | 8.70 | 8.43 | 8.18 |
| TC2000226 | C2orf52  | 140823 chromosome 20 open reading frame 52  | 1.92E-16 | 1 | 6.75 | 7.94 | 8.04 | 7.98 | 8.11 | 7.89 | 7.66 | 7.51 |
| TC2000600 | C2orf74  | 57186 chromosome 20 open reading frame 74   | 6.91E-14 | 1 | 6.75 | 7.47 | 7.41 | 7.27 | 7.17 | 6.97 | 6.86 | 6.74 |
| TC2100187 | C21orf70 | 85395 chromosome 21 open reading frame 70   | 0.000878 | 1 | 4.63 | 4.82 | 4.82 | 4.88 | 4.96 | 4.78 | 4.74 | 4.76 |
| TC2100233 | C21orf91 | 54149 chromosome 21 open reading frame 91   | 2.22E-11 | 1 | 6.70 | 7.51 | 7.70 | 7.73 | 7.42 | 7.52 | 7.44 | 7.60 |
| TC2200610 | C22orf28 | 51493 chromosome 22 open reading frame 28   | 2.43E-05 | 1 | 4.49 | 5.44 | 5.41 | 5.32 | 5.35 | 5.32 | 5.43 | 5.10 |
| TC2200750 | C22orf9  | 23313 chromosome 22 open reading frame 9    | 1.44E-18 | 1 | 5.31 | 6.15 | 6.60 | 6.70 | 6.47 | 6.07 | 5.99 | 5.88 |
| TC0202043 | C2orf12  | --- Uncharacterized protein C2orf12 (Cervi  | 5.44E-07 | 1 | 6.84 | 7.57 | 7.54 | 7.42 | 7.19 | 7.23 | 7.20 | 7.08 |
| TC0201995 | C2orf25  | 27249 chromosome 2 open reading frame 25    | 6.90E-22 | 1 | 6.59 | 7.53 | 7.83 | 7.41 | 7.29 | 7.26 | 7.09 | 7.09 |
| TC0200241 | C2orf30  | 27248 chromosome 2 open reading frame 30    | 1.70E-09 | 1 | 4.11 | 4.84 | 5.10 | 5.13 | 4.93 | 4.99 | 5.07 | 4.98 |
| TC0200970 | C2orf47  | 79568 chromosome 2 open reading frame 47    | 1.53E-19 | 1 | 3.65 | 4.91 | 5.28 | 5.12 | 4.95 | 4.54 | 4.55 | 4.34 |
| TC0200183 | C2orf58  | 285154 chromosome 2 open reading frame 58   | 4.97E-05 | 1 | 3.59 | 3.81 | 4.09 | 4.18 | 3.96 | 3.85 | 3.82 | 3.80 |
| TC0202208 | C2orf60  | 129450 chromosome 2 open reading frame 60   | 4.12E-19 | 1 | 4.12 | 5.05 | 5.18 | 4.95 | 4.82 | 4.42 | 4.43 | 4.30 |
| TC1200936 | C3AR1    | 719 complement component 3a receptor 1      | 3.35E-08 | 1 | 2.88 | 4.25 | 4.43 | 4.79 | 4.70 | 4.18 | 4.12 | 4.05 |
| TC0300041 | C3orf10  | 55845 chromosome 3 open reading frame 10    | 0.000501 | 1 | 7.16 | 7.76 | 7.81 | 7.90 | 7.86 | 7.81 | 7.79 | 7.79 |
| TC0300211 | C3orf23  | 285343 chromosome 3 open reading frame 23   | 6.04E-17 | 1 | 4.86 | 5.69 | 5.70 | 5.39 | 5.29 | 5.05 | 5.02 | 4.78 |
| TC0300404 | C3orf38  | 285237 chromosome 3 open reading frame 38   | 1.76E-05 | 1 | 4.86 | 5.69 | 5.78 | 5.65 | 5.40 | 5.60 | 5.69 | 5.65 |
| TC0301280 | C3orf63  | 23272 chromosome 3 open reading frame 63    | 6.56E-08 | 1 | 5.30 | 5.79 | 6.20 | 6.12 | 5.95 | 5.88 | 5.96 | 5.71 |
| TC0400465 | C4orf16  | 55435 chromosome 4 open reading frame 16    | 8.28E-10 | 1 | 3.81 | 4.73 | 4.61 | 4.71 | 4.45 | 4.32 | 4.45 | 4.30 |
| TC0401359 | C4orf18  | 51313 chromosome 4 open reading frame 18    | 5.01E-07 | 1 | 3.05 | 3.82 | 3.98 | 4.05 | 3.59 | 3.45 | 3.47 | 3.42 |
| TC0401396 | C4orf27  | 54969 chromosome 4 open reading frame 27    | 4.07E-13 | 1 | 4.62 | 5.67 | 6.01 | 5.77 | 5.70 | 5.59 | 5.61 | 5.48 |
| TC0400126 | C4orf28  | 133015 chromosome 4 open reading frame 28   | 7.38E-05 | 1 | 3.06 | 3.33 | 3.42 | 3.36 | 3.30 | 3.24 | 3.38 | 3.26 |
| TC0400464 | C4orf32  | 132720 chromosome 4 open reading frame 32   | 4.80E-09 | 1 | 5.19 | 6.19 | 6.40 | 6.56 | 6.34 | 6.35 | 6.33 | 6.35 |
| TC0400890 | C4orf34  | 201895 chromosome 4 open reading frame 34   | 2.99E-14 | 1 | 5.51 | 6.25 | 6.41 | 6.45 | 6.21 | 6.21 | 6.24 | 6.21 |
| TC0501284 | C5orf15  | 56951 chromosome 5 open reading frame 15    | 0.000274 | 1 | 5.23 | 5.57 | 5.59 | 5.54 | 5.56 | 5.54 | 5.52 | 5.53 |



|           |                          |                                            |          |   |      |       |       |      |      |      |      |      |
|-----------|--------------------------|--------------------------------------------|----------|---|------|-------|-------|------|------|------|------|------|
| TC0500096 | C5orf22                  | 55322 chromosome 5 open reading frame 22   | 8.24E-07 | 1 | 4.35 | 5.07  | 5.21  | 5.07 | 5.00 | 5.02 | 5.14 | 5.00 |
| TC0500378 | C5orf30                  | 90355 chromosome 5 open reading frame 30   | 9.43E-08 | 1 | 3.87 | 4.31  | 4.33  | 4.43 | 4.48 | 4.38 | 4.25 | 4.18 |
| TC0500528 | C5orf32                  | 84418 chromosome 5 open reading frame 32   | 2.77E-28 | 1 | 7.82 | 10.07 | 10.44 | 9.82 | 9.66 | 9.30 | 9.01 | 8.73 |
| TC0501010 | C5orf43                  | 643155 chromosome 5 open reading frame 43  | 1.27E-11 | 1 | 4.87 | 5.74  | 5.91  | 5.87 | 5.98 | 5.70 | 5.73 | 5.54 |
| TC0600886 | C6orf120                 | 387263 chromosome 6 open reading frame 120 | 1.82E-05 | 1 | 4.59 | 5.04  | 5.32  | 5.22 | 5.15 | 5.17 | 5.11 | 5.10 |
| TC0601392 | C6orf150                 | 115004 chromosome 6 open reading frame 150 | 7.02E-20 | 1 | 4.75 | 6.10  | 6.15  | 5.84 | 5.66 | 5.47 | 5.57 | 5.35 |
| TC0601441 | C6orf166                 | 55122 chromosome 6 open reading frame 166  | 1.47E-10 | 1 | 7.34 | 7.93  | 7.98  | 7.99 | 7.96 | 8.05 | 7.88 | 7.95 |
| TC0600901 | C6orf195                 | 154386 chromosome 6 open reading frame 195 | 0.000304 | 1 | 3.47 | 3.67  | 3.60  | 3.47 | 3.64 | 3.51 | 3.45 | 3.45 |
| TC0601519 | C6orf199                 | 221264 chromosome 6 open reading frame 199 | 1.63E-05 | 1 | 3.78 | 4.10  | 4.44  | 4.41 | 4.22 | 4.18 | 4.27 | 4.22 |
| TC0600415 | C6orf206                 | 221421 chromosome 6 open reading frame 206 | 2.38E-07 | 1 | 4.34 | 4.85  | 4.94  | 5.12 | 5.00 | 4.85 | 4.85 | 4.71 |
| TC0601126 | C6orf47                  | 57827 chromosome 6 open reading frame 47   | 0.000129 | 1 | 5.12 | 5.52  | 5.50  | 5.48 | 5.44 | 5.38 | 5.39 | 5.47 |
| TC0601230 | C6orf64                  | 55776 chromosome 6 open reading frame 64   | 9.76E-05 | 1 | 3.60 | 3.91  | 3.97  | 3.96 | 3.90 | 3.94 | 4.01 | 3.91 |
| TC0601693 | C6orf98                  | 387079 chromosome 6 open reading frame 98  | 6.63E-05 | 1 | 3.34 | 3.59  | 3.57  | 3.51 | 3.43 | 3.36 | 3.31 | 3.28 |
| TC0700114 | C7orf30                  | 115416 chromosome 7 open reading frame 30  | 1.63E-13 | 1 | 6.38 | 7.32  | 7.56  | 7.41 | 7.21 | 7.39 | 7.38 | 7.29 |
| TC0701561 | C7orf60 /// NP           | 154743 chromosome 7 open reading frame 60  | 1.03E-06 | 1 | 6.54 | 7.01  | 7.21  | 7.34 | 7.16 | 7.21 | 7.12 | 7.14 |
| TC0800257 | C8orf40                  | 114926 chromosome 8 open reading frame 40  | 3.97E-10 | 1 | 4.86 | 5.59  | 5.67  | 5.55 | 5.65 | 5.57 | 5.47 | 5.36 |
| TC0800643 | C8orf77                  | --- Uncharacterized protein C8orf77. [Sou  | 0.00042  | 1 | 3.73 | 4.14  | 4.00  | 3.93 | 3.89 | 3.91 | 3.97 | 3.93 |
| TC0900412 | C9orf102 /// N 375748 // | chromosome 9 open reading frame 102        | 5.22E-07 | 1 | 4.42 | 4.56  | 4.84  | 4.78 | 4.48 | 4.40 | 4.51 | 4.42 |
| TC0900334 | C9orf103                 | 414328 chromosome 9 open reading frame 103 | 3.33E-25 | 1 | 4.89 | 5.94  | 7.11  | 7.20 | 6.64 | 5.93 | 5.86 | 5.45 |
| TC0901329 | C9orf126                 | 286205 chromosome 9 open reading frame 126 | 1.38E-06 | 1 | 3.32 | 3.42  | 3.69  | 3.39 | 3.34 | 3.38 | 3.38 | 3.37 |
| TC0900590 | C9orf16                  | 79095 chromosome 9 open reading frame 16   | 4.84E-08 | 1 | 4.71 | 5.21  | 5.14  | 5.14 | 5.22 | 5.22 | 5.07 | 5.14 |
| TC0900727 | C9orf167                 | 54863 chromosome 9 open reading frame 167  | 4.54E-07 | 1 | 5.77 | 6.25  | 6.23  | 6.19 | 6.11 | 6.11 | 6.16 | 6.02 |
| TC0900172 | C9orf19                  | 152007 chromosome 9 open reading frame 19  | 0.000827 | 1 | 8.06 | 8.54  | 8.52  | 8.63 | 8.52 | 8.56 | 8.38 | 8.49 |
| TC0900767 | C9orf46                  | 55848 chromosome 9 open reading frame 46   | 4.55E-14 | 1 | 4.39 | 5.22  | 5.58  | 5.54 | 5.30 | 5.30 | 5.29 | 5.15 |
| TC0900475 | C9orf6                   | 54942 chromosome 9 open reading frame 6 /, | 0.000121 | 1 | 3.75 | 4.13  | 4.30  | 4.16 | 4.09 | 4.08 | 4.00 | 4.03 |
| TC0901081 | C9orf64                  | 84267 chromosome 9 open reading frame 64   | 5.28E-06 | 1 | 4.62 | 4.91  | 5.11  | 4.97 | 4.88 | 4.88 | 5.00 | 4.95 |
| TC0901255 | C9orf80                  | 58493 chromosome 9 open reading frame 80   | 8.13E-05 | 1 | 5.17 | 5.51  | 5.44  | 5.36 | 5.35 | 5.47 | 5.49 | 5.52 |
| TC0901051 | C9orf95                  | 54981 chromosome 9 open reading frame 95   | 2.69E-05 | 1 | 4.32 | 4.84  | 4.99  | 5.00 | 4.85 | 4.86 | 4.84 | 4.68 |
| TC1700651 | CA4                      | 762 carbonic anhydrase IV                  | 6.02E-12 | 1 | 5.43 | 6.27  | 6.57  | 6.30 | 6.37 | 6.07 | 5.83 | 5.69 |
| TC0X00060 | CA5BL                    | --- Carbonic anhydrase VB-like protein (Fr | 0.000241 | 1 | 4.61 | 4.86  | 4.76  | 4.68 | 4.75 | 4.73 | 4.63 | 4.63 |
| TC0900163 | CA9                      | 768 carbonic anhydrase IX                  | 0.000595 | 1 | 4.22 | 4.39  | 4.33  | 4.26 | 4.34 | 4.31 | 4.18 | 4.20 |
| TC0201163 | CAB39                    | 51719 calcium binding protein 39           | 1.18E-19 | 1 | 7.17 | 7.89  | 8.07  | 7.91 | 7.76 | 7.62 | 7.46 | 7.48 |
| TC1101594 | CABP2                    | 51475 calcium binding protein 2            | 0.000479 | 1 | 5.13 | 5.26  | 5.23  | 5.22 | 5.19 | 5.15 | 5.04 | 5.15 |
| TC0101337 | CACNA1E                  | 777 calcium channel, voltage-dependent, R  | 5.42E-06 | 1 | 4.36 | 4.54  | 4.77  | 4.64 | 4.37 | 4.37 | 4.31 | 4.27 |

|           |                          |                                                           |          |   |       |       |       |       |       |       |       |       |
|-----------|--------------------------|-----------------------------------------------------------|----------|---|-------|-------|-------|-------|-------|-------|-------|-------|
| TC1200296 | CACNB3                   | 784 calcium channel, voltage-dependent, b                 | 0.000718 | 1 | 4.04  | 4.13  | 4.16  | 4.03  | 4.10  | 4.08  | 4.03  | 4.01  |
| TC0701592 | CADPS2                   | 93664 Ca <sup>2+</sup> -dependent activator protein for s | 0.000777 | 1 | 2.49  | 2.59  | 2.62  | 2.53  | 2.57  | 2.53  | 2.50  | 2.51  |
| TC1400439 | CALM3 /// CAL 808 /// 80 | calmodulin 3 (phosphorylase kinase, de                    | 1.47E-18 | 1 | 9.07  | 9.76  | 9.90  | 9.87  | 9.92  | 9.78  | 9.71  | 9.66  |
| TC0100422 | CAP1                     | 10487 CAP, adenylate cyclase-associated prot              | 1.81E-07 | 1 | 10.27 | 10.54 | 10.59 | 10.57 | 10.47 | 10.43 | 10.36 | 10.37 |
| TC0201673 | CAPG                     | 822 capping protein (actin filament), gelsoli             | 7.50E-29 | 1 | 5.46  | 6.88  | 7.03  | 6.81  | 6.68  | 6.44  | 6.34  | 6.12  |
| TC1100534 | CAPN1                    | 823 calpain 1, (mu/l) large subunit                       | 4.20E-06 | 1 | 5.65  | 6.13  | 6.14  | 6.15  | 6.09  | 5.88  | 5.80  | 5.79  |
| TC1900470 | CAPNS1                   | 826 calpain, small subunit 1                              | 5.44E-08 | 1 | 7.64  | 8.63  | 8.66  | 8.78  | 8.66  | 8.37  | 8.29  | 8.23  |
| TC0100846 | CAPZA1                   | 829 capping protein (actin filament) muscle               | 6.66E-05 | 1 | 8.40  | 8.69  | 8.77  | 8.69  | 8.61  | 8.63  | 8.52  | 8.57  |
| TC0700630 | CAPZA2                   | 830 capping protein (actin filament) muscle               | 2.33E-09 | 1 | 8.67  | 9.07  | 9.38  | 9.33  | 9.23  | 9.24  | 9.17  | 9.19  |
| TC0500143 | CARD6                    | 84674 caspase recruitment domain family, me               | 1.05E-27 | 1 | 5.55  | 6.98  | 7.33  | 7.14  | 6.86  | 6.49  | 6.47  | 6.22  |
| TC1101082 | CARS                     | 833 cysteinyl-tRNA synthetase                             | 0.000269 | 1 | 5.75  | 6.06  | 5.93  | 5.91  | 5.82  | 5.84  | 5.82  | 5.78  |
| TC0500354 | CAST                     | 831 calpastatin /// Calpastatin (Calpain inhi             | 4.03E-13 | 1 | 6.83  | 8.27  | 8.34  | 8.24  | 8.10  | 7.78  | 7.95  | 7.54  |
| TC1101559 | CATSPER1                 | 117144 cation channel, sperm associated 1                 | 5.32E-14 | 1 | 4.18  | 4.55  | 4.79  | 4.98  | 4.69  | 4.54  | 4.41  | 4.34  |
| TC1600510 | CBFB                     | 865 core-binding factor, beta subunit                     | 3.08E-06 | 1 | 6.64  | 7.33  | 7.32  | 7.27  | 7.17  | 7.27  | 7.29  | 7.20  |
| TC0102412 | CCBL2 /// NP_C           | 56267 cysteine conjugate-beta lyase 2 /// Kyn             | 6.37E-07 | 1 | 5.24  | 5.79  | 5.65  | 5.41  | 5.29  | 5.36  | 5.39  | 5.33  |
| TC1600294 | CCDC101                  | 112869 coiled-coil domain containing 101                  | 6.96E-08 | 1 | 4.86  | 5.13  | 5.39  | 5.42  | 5.33  | 5.19  | 5.15  | 5.12  |
| TC2200169 | CCDC117                  | 150275 coiled-coil domain containing 117                  | 5.74E-09 | 1 | 5.76  | 6.46  | 6.70  | 6.39  | 6.29  | 6.31  | 6.29  | 6.20  |
| TC0301162 | CCDC12                   | 151903 coiled-coil domain containing 12                   | 5.19E-08 | 1 | 6.65  | 7.30  | 7.26  | 7.27  | 7.34  | 7.27  | 7.23  | 7.15  |
| TC0700117 | CCDC126                  | 90693 coiled-coil domain containing 126                   | 1.53E-07 | 1 | 3.30  | 4.22  | 4.32  | 4.13  | 4.11  | 4.24  | 4.13  | 4.03  |
| TC0X00221 | CCDC22                   | 28952 coiled-coil domain containing 22                    | 0.00024  | 1 | 4.67  | 4.85  | 4.83  | 4.82  | 4.92  | 4.83  | 4.77  | 4.69  |
| TC1101270 | CCDC34                   | 91057 coiled-coil domain containing 34 /// co             | 0.000178 | 1 | 3.44  | 3.87  | 4.27  | 3.88  | 4.07  | 3.94  | 3.97  | 3.74  |
| TC1701605 | CCDC47                   | 57003 coiled-coil domain containing 47                    | 2.51E-05 | 1 | 7.37  | 7.90  | 7.82  | 7.74  | 7.65  | 7.58  | 7.58  | 7.57  |
| TC1201503 | CCDC53                   | 51019 coiled-coil domain containing 53                    | 9.06E-18 | 1 | 6.21  | 7.03  | 7.52  | 7.36  | 7.13  | 7.05  | 7.09  | 7.01  |
| TC1100747 | CCDC67                   | 159989 coiled-coil domain containing 67                   | 2.79E-05 | 1 | 1.97  | 2.07  | 2.16  | 2.07  | 2.11  | 2.03  | 2.05  | 2.03  |
| TC1101708 | CCDC90B                  | 60492 coiled-coil domain containing 90B                   | 9.35E-10 | 1 | 5.00  | 5.87  | 6.05  | 5.85  | 5.81  | 5.89  | 5.92  | 5.86  |
| TC1200221 | CCDC91                   | 55297 coiled-coil domain containing 91 /// Co             | 2.29E-07 | 1 | 4.76  | 5.34  | 5.49  | 5.41  | 5.29  | 5.25  | 5.33  | 5.30  |
| TC0400808 | CCDC96                   | 257236 coiled-coil domain containing 96                   | 7.47E-05 | 1 | 3.23  | 3.68  | 3.47  | 3.48  | 3.21  | 3.57  | 3.61  | 3.54  |
| TC1300086 | CCNA1                    | 8900 cyclin A1                                            | 2.07E-05 | 1 | 2.55  | 2.93  | 3.13  | 3.34  | 3.17  | 3.04  | 2.86  | 2.82  |
| TC0601478 | CCNC                     | 892 cyclin C /// Cyclin-C. [Source:Uniprot/S'             | 5.14E-12 | 1 | 3.50  | 4.24  | 4.24  | 4.07  | 4.05  | 3.98  | 3.92  | 3.82  |
| TC0601260 | CCND3                    | 896 cyclin D3 /// G1/S-specific cyclin-D3. [S'            | 1.39E-11 | 1 | 5.45  | 6.13  | 6.05  | 6.03  | 6.07  | 5.89  | 5.81  | 5.76  |
| TC0500672 | CCNG1                    | 900 cyclin G1 /// Cyclin-G1 (Cyclin-G). [Sour             | 5.14E-07 | 1 | 4.79  | 5.72  | 5.79  | 5.66  | 5.62  | 5.55  | 5.55  | 5.42  |
| TC0501129 | CCNH                     | 902 cyclin H                                              | 4.11E-05 | 1 | 6.15  | 6.55  | 6.28  | 6.21  | 6.14  | 6.27  | 6.31  | 6.28  |
| TC0301152 | CCR1                     | 1230 chemokine (C-C motif) receptor 1                     | 0.000453 | 1 | 8.76  | 9.29  | 9.37  | 9.44  | 9.03  | 9.23  | 9.14  | 9.30  |
| TC1100029 | CD151                    | 977 CD151 molecule (Raph blood group)                     | 1.39E-05 | 1 | 4.73  | 4.99  | 4.96  | 5.09  | 5.13  | 5.03  | 4.92  | 4.92  |

|           |                |        |                                           |          |   |      |       |      |      |      |      |      |      |
|-----------|----------------|--------|-------------------------------------------|----------|---|------|-------|------|------|------|------|------|------|
| TC1200923 | CD163          | 9332   | CD163 molecule                            | 4.93E-10 | 1 | 3.58 | 4.84  | 4.94 | 4.37 | 3.91 | 3.72 | 3.86 | 3.75 |
| TC0601512 | CD164          | 8763   | CD164 molecule, sialomucin /// Putativ    | 8.12E-20 | 1 | 8.36 | 9.55  | 9.77 | 9.65 | 9.53 | 9.44 | 9.26 | 9.20 |
| TC1601006 | CD2BP2         | 10421  | CD2 (cytoplasmic tail) binding protein 2  | 1.54E-05 | 1 | 5.93 | 6.53  | 6.41 | 6.47 | 6.35 | 6.39 | 6.26 | 6.30 |
| TC0700443 | CD36           | 948    | CD36 molecule (thrombospondin recep       | 0.000892 | 1 | 3.64 | 4.52  | 4.75 | 4.97 | 4.59 | 4.51 | 4.37 | 4.40 |
| TC1100275 | CD44           | 960    | CD44 molecule (Indian blood group) ///    | 4.71E-29 | 1 | 6.36 | 8.35  | 8.33 | 8.15 | 7.77 | 7.37 | 7.17 | 6.95 |
| TC0102924 | CD48           | 962    | CD48 molecule /// CD48 antigen precu      | 1.42E-19 | 1 | 6.20 | 7.51  | 8.13 | 7.90 | 7.52 | 7.49 | 7.48 | 7.28 |
| TC0101473 | CD55           | 1604   | CD55 molecule, decay accelerating fact    | 4.67E-22 | 1 | 9.22 | 10.01 | 9.91 | 9.69 | 9.61 | 9.47 | 9.36 | 9.35 |
| TC0102581 | CD58           | 965    | CD58 molecule /// Lymphocyte functio      | 1.62E-06 | 1 | 6.88 | 7.49  | 7.59 | 7.31 | 7.24 | 7.34 | 7.32 | 7.32 |
| TC1101298 | CD59 /// Q3C1' | 966    | CD59 molecule, complement regulator       | 6.85E-20 | 1 | 5.13 | 6.25  | 6.24 | 6.17 | 5.99 | 5.83 | 5.76 | 5.76 |
| TC1201280 | CD63           | 967    | CD63 molecule                             | 2.76E-20 | 1 | 6.61 | 7.15  | 7.26 | 7.33 | 7.27 | 7.20 | 7.11 | 7.04 |
| TC1100299 | CD82           | 3732   | CD82 molecule                             | 5.64E-05 | 1 | 5.91 | 6.20  | 6.34 | 6.29 | 6.19 | 5.98 | 5.96 | 5.89 |
| TC0X01344 | CD99L2         | 83692  | CD99 molecule-like 2 /// CD99 antigen-    | 4.74E-12 | 1 | 4.90 | 5.00  | 5.26 | 5.32 | 5.24 | 5.14 | 5.04 | 4.91 |
| TC0100221 | CDA            | 978    | cytidine deaminase                        | 2.32E-05 | 1 | 7.46 | 8.30  | 8.15 | 8.33 | 8.47 | 8.31 | 7.97 | 8.02 |
| TC1300142 | CDADC1         | 81602  | cytidine and dCMP deaminase domain        | 5.84E-20 | 1 | 4.29 | 6.67  | 6.10 | 5.57 | 5.63 | 5.39 | 5.28 | 5.00 |
| TC1901162 | CDC37          | 11140  | cell division cycle 37 homolog (S. cerevi | 0.000128 | 1 | 6.86 | 7.01  | 7.20 | 7.39 | 7.15 | 6.95 | 6.97 | 6.88 |
| TC0600636 | CDC40          | 51362  | cell division cycle 40 homolog (S. cerevi | 3.35E-07 | 1 | 6.06 | 6.70  | 6.96 | 6.89 | 6.59 | 6.65 | 6.76 | 6.59 |
| TC0100238 | CDC42          | 998    | cell division cycle 42 (GTP binding prote | 0.00068  | 1 | 8.71 | 8.93  | 9.01 | 8.93 | 8.89 | 8.93 | 8.87 | 8.89 |
| TC0201437 | CDC42EP3       | 10602  | CDC42 effector protein (Rho GTPase bi     | 4.51E-13 | 1 | 7.11 | 7.74  | 7.82 | 7.79 | 7.68 | 7.54 | 7.37 | 7.36 |
| TC0101378 | CDC73          | 79577  | cell division cycle 73, Paf1/RNA polyme   | 1.58E-11 | 1 | 7.98 | 8.74  | 8.67 | 8.46 | 8.37 | 8.41 | 8.41 | 8.36 |
| TC1200416 | CDK2           | 1017   | cyclin-dependent kinase 2                 | 9.24E-06 | 1 | 4.40 | 5.32  | 4.84 | 4.84 | 5.16 | 5.02 | 4.84 | 4.71 |
| TC0701759 | CDK5           | 1020   | cyclin-dependent kinase 5                 | 1.80E-08 | 1 | 4.80 | 5.11  | 5.42 | 5.53 | 5.49 | 5.26 | 5.26 | 5.01 |
| TC0901293 | CDK5RAP2       | 55755  | CDK5 regulatory subunit associated prc    | 8.76E-09 | 1 | 5.21 | 5.73  | 5.86 | 5.92 | 5.95 | 5.75 | 5.85 | 5.53 |
| TC1901167 | CDKN2D         | 1032   | cyclin-dependent kinase inhibitor 2D (p   | 8.57E-09 | 1 | 5.93 | 6.17  | 6.25 | 6.17 | 6.19 | 6.20 | 6.01 | 6.10 |
| TC1601280 | CDYL2          | 124359 | chromodomain protein, Y-like 2            | 0.000111 | 1 | 4.54 | 4.75  | 4.69 | 4.77 | 4.78 | 4.66 | 4.64 | 4.60 |
| TC1901553 | CEACAM1        | 634    | carcinoembryonic antigen-related cell     | 1.27E-13 | 1 | 7.71 | 9.82  | 9.46 | 9.09 | 9.11 | 8.88 | 8.57 | 8.40 |
| TC1901393 | CEBPA /// NM_  | 1050   | CCAAT/enhancer binding protein (C/EB      | 2.00E-11 | 1 | 4.65 | 4.99  | 5.08 | 5.04 | 5.01 | 4.95 | 4.85 | 4.84 |
| TC2000365 | CEBPB          | 1051   | CCAAT/enhancer binding protein (C/EB      | 1.82E-17 | 1 | 6.21 | 6.96  | 7.00 | 6.82 | 6.62 | 6.71 | 6.63 | 6.67 |
| TC0800919 | CEBPD          | 1052   | CCAAT/enhancer binding protein (C/EB      | 1.10E-09 | 1 | 5.48 | 6.06  | 6.03 | 5.98 | 5.99 | 5.92 | 5.84 | 5.89 |
| TC0201433 | CEBPZ          | 10153  | CCAAT/enhancer binding protein zeta       | 5.80E-19 | 1 | 4.77 | 7.08  | 6.92 | 6.43 | 6.46 | 6.25 | 6.28 | 5.93 |
| TC2000521 | CENPB          | 1059   | centromere protein B, 80kDa               | 8.36E-07 | 1 | 5.17 | 5.69  | 5.70 | 5.84 | 5.77 | 5.74 | 5.64 | 5.59 |
| TC1700336 | CENTA2         | 55803  | centaurin, alpha 2                        | 9.60E-05 | 1 | 3.86 | 4.15  | 4.10 | 4.24 | 4.03 | 3.99 | 4.07 | 3.99 |
| TC0400873 | CENTD1         | 116984 | centaurin, delta 1                        | 2.74E-17 | 1 | 4.41 | 6.29  | 5.85 | 5.20 | 5.17 | 5.32 | 5.35 | 5.13 |
| TC1201326 | CENTG1         | 116986 | centaurin, gamma 1 /// Centaurin-gam      | 1.95E-09 | 1 | 5.53 | 6.23  | 5.88 | 5.88 | 5.93 | 5.83 | 5.75 | 5.66 |
| TC0400243 | CEP135         | 9662   | centrosomal protein 135kDa                | 1.72E-07 | 1 | 4.83 | 5.85  | 5.74 | 5.43 | 5.19 | 5.17 | 5.33 | 5.14 |

|           |                         |        |                                                      |          |   |       |       |       |       |       |       |       |       |
|-----------|-------------------------|--------|------------------------------------------------------|----------|---|-------|-------|-------|-------|-------|-------|-------|-------|
| TC0100829 | CEPT1                   | 10390  | choline/ethanolamine phosphotransferase 1            | 1.37E-08 | 1 | 4.83  | 5.55  | 5.67  | 5.47  | 5.32  | 5.35  | 5.36  | 5.24  |
| TC1101553 | CFL1                    | 1072   | cofilin 1 (non-muscle)                               | 4.18E-08 | 1 | 5.58  | 6.10  | 6.14  | 6.15  | 6.12  | 5.98  | 5.84  | 5.84  |
| TC1400237 | CGRRF1                  | 10668  | cell growth regulator with ring finger domain        | 3.10E-06 | 1 | 3.92  | 4.48  | 4.55  | 4.56  | 4.47  | 4.45  | 4.46  | 4.40  |
| TC0800312 | CHCHD7                  | 79145  | coiled-coil-helix-coiled-coil-helix domain           | 2.81E-19 | 1 | 4.85  | 6.52  | 6.75  | 6.13  | 6.02  | 5.83  | 5.87  | 5.60  |
| TC0900319 | CHCHD9                  | 645345 | coiled-coil-helix-coiled-coil-helix domain           | 0.000694 | 1 | 4.21  | 4.60  | 4.78  | 4.53  | 4.55  | 4.59  | 4.59  | 4.64  |
| TC0400954 | CHIC2                   | 26511  | cysteine-rich hydrophobic domain 2                   | 7.81E-11 | 1 | 7.53  | 8.18  | 8.35  | 8.34  | 8.24  | 8.27  | 8.16  | 8.22  |
| TC0X01071 | CHM                     | 1121   | choroideremia (Rab escort protein 1) //              | 5.53E-11 | 1 | 3.65  | 4.13  | 4.23  | 4.04  | 3.86  | 3.82  | 3.85  | 3.81  |
| TC0300399 | CHMP2B                  | 25978  | chromatin modifying protein 2B                       | 5.15E-15 | 1 | 7.37  | 8.36  | 8.46  | 8.19  | 8.00  | 8.19  | 8.15  | 8.13  |
| TC2000206 | CHMP4B                  | 128866 | chromatin modifying protein 4B                       | 3.00E-11 | 1 | 8.31  | 9.00  | 8.85  | 8.89  | 8.86  | 8.81  | 8.80  | 8.75  |
| TC1101740 | CHORDC1                 | 26973  | cysteine and histidine-rich domain (CHORDC1)         | 1.60E-09 | 1 | 4.42  | 5.03  | 5.41  | 5.10  | 5.01  | 4.86  | 4.88  | 4.74  |
| TC1500250 | CHP                     | 11261  | calcium binding protein P22                          | 7.71E-07 | 1 | 7.85  | 8.60  | 8.57  | 8.50  | 8.40  | 8.35  | 8.22  | 8.26  |
| TC1200634 | CHPT1                   | 56994  | choline phosphotransferase 1                         | 2.08E-16 | 1 | 7.06  | 8.07  | 8.40  | 8.33  | 8.16  | 8.10  | 8.08  | 8.02  |
| TC0300685 | CHST2                   | 9435   | carbohydrate (N-acetylglucosamine-6-C) transferase 2 | 2.65E-11 | 1 | 4.44  | 5.35  | 5.25  | 5.22  | 5.15  | 5.11  | 4.94  | 4.87  |
| TC1501279 | CHSY1                   | 651391 | // chondroitin sulfate synthase 1                    | 1.46E-19 | 1 | 7.30  | 8.72  | 8.28  | 8.01  | 7.93  | 8.06  | 7.95  | 7.86  |
| TC1000262 | CISD1                   | 55847  | CDGSH iron sulfur domain 1                           | 8.06E-06 | 1 | 3.10  | 3.53  | 3.92  | 3.75  | 3.80  | 3.75  | 3.79  | 3.65  |
| TC1201527 | CKAP4                   | 10970  | cytoskeleton-associated protein 4 /// C              | 2.54E-20 | 1 | 6.71  | 7.44  | 7.42  | 7.36  | 7.43  | 7.36  | 7.26  | 7.18  |
| TC0301847 | CLDN1                   | 9076   | claudin 1                                            | 0.000303 | 1 | 2.91  | 3.22  | 3.24  | 3.08  | 3.15  | 3.18  | 3.09  | 3.13  |
| TC0301393 | CLDND1                  | 56650  | claudin domain containing 1                          | 1.67E-08 | 1 | 6.22  | 6.77  | 6.83  | 6.60  | 6.53  | 6.55  | 6.55  | 6.53  |
| TC1200101 | CLEC4D                  | 338339 | C-type lectin domain family 4, member 4              | 1.17E-32 | 1 | 5.84  | 9.38  | 9.16  | 8.33  | 8.24  | 7.87  | 7.54  | 7.32  |
| TC1200943 | CLEC4E                  | 26253  | C-type lectin domain family 4, member 5              | 8.20E-06 | 1 | 10.30 | 10.85 | 10.63 | 10.49 | 10.42 | 10.38 | 10.41 | 10.53 |
| TC0701699 | CLEC5A                  | 23601  | C-type lectin domain family 5, member 1              | 2.92E-19 | 1 | 3.30  | 6.48  | 6.32  | 5.77  | 6.20  | 5.98  | 5.50  | 4.76  |
| TC1200099 | CLEC6A                  | 93978  | C-type lectin domain family 6, member 1              | 1.18E-23 | 1 | 3.58  | 5.35  | 5.48  | 4.75  | 4.48  | 4.29  | 4.16  | 4.12  |
| TC0501453 | CLINT1 /// Q14          | 9685   | clathrin interactor 1 /// EPN4_HUMAN                 | 7.91E-05 | 1 | 7.77  | 8.81  | 8.72  | 8.69  | 8.73  | 8.67  | 8.62  | 8.44  |
| TC0400961 | CLOCK                   | 9575   | clock homolog (mouse)                                | 1.75E-09 | 1 | 3.49  | 3.71  | 3.81  | 3.78  | 3.69  | 3.57  | 3.63  | 3.57  |
| TC0301665 | CLRN1                   | 7401   | clarin 1 /// Clarin-1 (Usher syndrome type 1)        | 5.02E-09 | 1 | 2.65  | 2.79  | 2.88  | 3.12  | 3.03  | 2.78  | 2.78  | 2.64  |
| TC1700646 | CLTC                    | 1213   | clathrin, heavy chain (Hc)                           | 3.88E-11 | 1 | 7.05  | 7.52  | 7.61  | 7.41  | 7.24  | 7.13  | 7.05  | 7.03  |
| TC0300116 | CMC1                    | 152100 | COX assembly mitochondrial protein hcr               | 1.85E-08 | 1 | 3.75  | 4.12  | 4.25  | 4.28  | 4.20  | 4.09  | 4.17  | 4.03  |
| TC1600501 | CMTM1 /// CKI 113540 // | 113540 | CKLF-like MARVEL transmembrane domain containing 1   | 1.38E-06 | 1 | 6.85  | 7.28  | 7.38  | 7.36  | 7.25  | 7.24  | 7.14  | 7.18  |
| TC1600503 | CMTM3                   | 123920 | CKLF-like MARVEL transmembrane domain containing 3   | 1.21E-11 | 1 | 5.02  | 5.49  | 5.50  | 5.60  | 5.46  | 5.44  | 5.37  | 5.44  |
| TC1601159 | CMTM4                   | 146223 | CKLF-like MARVEL transmembrane domain containing 4   | 6.33E-06 | 1 | 3.95  | 4.15  | 4.23  | 4.04  | 4.04  | 4.02  | 3.94  | 3.88  |
| TC0301081 | CMTM6                   | 54918  | CKLF-like MARVEL transmembrane domain containing 6   | 9.54E-08 | 1 | 7.07  | 7.42  | 7.58  | 7.46  | 7.35  | 7.50  | 7.46  | 7.47  |
| TC1400868 | CNIH                    | 10175  | cornichon homolog (Drosophila)                       | 5.23E-10 | 1 | 3.50  | 3.97  | 4.17  | 4.28  | 4.31  | 4.06  | 3.92  | 3.89  |
| TC0101551 | CNIH4                   | 29097  | cornichon homolog 4 (Drosophila) /// C               | 2.74E-35 | 1 | 6.59  | 8.99  | 9.24  | 8.92  | 8.74  | 8.66  | 8.49  | 8.33  |
| TC0701655 | CNOT4                   | 4850   | CCR4-NOT transcription complex, subunit 4            | 3.46E-05 | 1 | 5.62  | 6.04  | 6.08  | 5.95  | 5.84  | 5.92  | 6.03  | 5.95  |

|           |                |            |                                            |          |   |      |      |      |      |      |      |      |      |
|-----------|----------------|------------|--------------------------------------------|----------|---|------|------|------|------|------|------|------|------|
| TC0900075 | CNTLN /// C9o  | 54875      | centlein, centrosomal protein /// Unch     | 4.64E-11 | 1 | 3.50 | 4.23 | 4.39 | 4.49 | 4.47 | 4.45 | 4.34 | 4.15 |
| TC1400142 | COCH           | 1690       | coagulation factor C homolog, cochlin (    | 6.37E-05 | 1 | 3.40 | 3.60 | 3.71 | 3.62 | 3.61 | 3.56 | 3.54 | 3.49 |
| TC0501073 | COL4A3BP       | 10087      | collagen, type IV, alpha 3 (Goodpasture    | 7.75E-12 | 1 | 7.09 | 7.72 | 7.89 | 7.86 | 7.69 | 7.59 | 7.55 | 7.40 |
| TC0200276 | COMMD1         | 150684     | copper metabolism (Murr1) domain co        | 3.50E-10 | 1 | 4.86 | 6.24 | 6.39 | 6.39 | 6.42 | 6.38 | 6.34 | 5.97 |
| TC1500494 | COMMD4         | 54939      | COMM domain containing 4 /// COMM          | 1.82E-05 | 1 | 5.01 | 5.49 | 5.20 | 5.18 | 5.27 | 5.29 | 5.27 | 5.12 |
| TC1001085 | COMTD1         | 118881     | catechol-O-methyltransferase domain c      | 5.70E-06 | 1 | 5.17 | 5.39 | 5.42 | 5.40 | 5.50 | 5.46 | 5.33 | 5.34 |
| TC0102918 | COPA           | 1314       | coatomer protein complex, subunit alp      | 1.93E-13 | 1 | 6.60 | 7.55 | 7.39 | 7.25 | 7.06 | 6.90 | 6.82 | 6.70 |
| TC1101220 | COPB1          | 1315       | coatomer protein complex, subunit bet      | 4.41E-09 | 1 | 6.53 | 7.23 | 7.31 | 7.21 | 7.05 | 7.06 | 7.09 | 6.97 |
| TC0301609 | COPB2          | 9276       | coatomer protein complex, subunit bet      | 3.34E-10 | 1 | 7.54 | 8.07 | 8.16 | 8.10 | 7.93 | 7.93 | 7.91 | 7.88 |
| TC0400360 | COPS4          | 51138      | COP9 constitutive photomorphogenic t       | 8.03E-07 | 1 | 3.99 | 4.88 | 4.90 | 4.83 | 4.94 | 4.89 | 4.83 | 4.70 |
| TC0201215 | COPS8          | 10920      | COP9 constitutive photomorphogenic t       | 0.000124 | 1 | 3.58 | 3.88 | 4.10 | 4.03 | 4.00 | 3.91 | 3.99 | 3.92 |
| TC1200388 | COPZ1          | 22818      | coatomer protein complex, subunit zet      | 9.03E-06 | 1 | 5.70 | 6.62 | 6.43 | 6.46 | 6.52 | 6.37 | 6.36 | 6.33 |
| TC0401089 | COQ2           | 27235      | coenzyme Q2 homolog, prenyltransfera       | 6.15E-10 | 1 | 5.52 | 6.28 | 6.31 | 6.12 | 6.05 | 6.11 | 6.10 | 5.85 |
| TC1201630 | COQ5           | 84274      | coenzyme Q5 homolog, methyltransfer        | 1.17E-07 | 1 | 4.49 | 5.39 | 5.22 | 5.38 | 5.53 | 5.40 | 5.30 | 5.05 |
| TC1600222 | COQ7           | 10229      | coenzyme Q7 homolog, ubiquinone (ye        | 1.15E-08 | 1 | 4.88 | 5.67 | 5.64 | 5.55 | 5.42 | 5.48 | 5.37 | 5.40 |
| TC1001213 | COX15          | 1355       | COX15 homolog, cytochrome c oxidase        | 3.09E-14 | 1 | 5.56 | 6.16 | 6.40 | 6.24 | 6.04 | 5.92 | 5.93 | 5.79 |
| TC0801150 | COX6C          | 1345       | cytochrome c oxidase subunit VIc           | 3.00E-08 | 1 | 3.96 | 4.36 | 4.61 | 4.50 | 4.60 | 4.54 | 4.52 | 4.46 |
| TC0601397 | COX7A2         | 1347       | cytochrome c oxidase subunit VIIa poly     | 1.14E-09 | 1 | 4.29 | 4.85 | 4.91 | 4.77 | 4.76 | 4.78 | 4.75 | 4.73 |
| TC0201459 | COX7A2L        | 9167       | cytochrome c oxidase subunit VIIa poly     | 1.28E-16 | 1 | 5.19 | 6.63 | 6.53 | 6.40 | 6.64 | 6.53 | 6.29 | 6.08 |
| TC0500326 | COX7C          | 1350       | cytochrome c oxidase subunit VIIc          | 3.77E-17 | 1 | 5.52 | 6.74 | 6.80 | 6.65 | 6.71 | 6.73 | 6.61 | 6.52 |
| TC1100501 | COX8A          | 1351       | cytochrome c oxidase subunit 8A (ubiq      | 1.10E-11 | 1 | 7.31 | 8.35 | 8.46 | 8.50 | 8.62 | 8.44 | 8.41 | 8.24 |
| TC1600228 | CP110 /// CE11 | 9738       | CP110 protein /// Centrosomal protein      | 1.19E-05 | 1 | 4.56 | 5.23 | 5.09 | 4.94 | 4.79 | 4.82 | 4.97 | 4.90 |
| TC0500719 | CPEB4          | 80315      | cytoplasmic polyadenylation element b      | 1.52E-10 | 1 | 7.94 | 8.55 | 8.27 | 8.18 | 8.08 | 7.98 | 7.90 | 7.80 |
| TC0601216 | CPNE5          | 57699      | copine V                                   | 1.27E-19 | 1 | 3.62 | 4.36 | 4.27 | 3.92 | 3.84 | 3.81 | 3.72 | 3.66 |
| TC1201104 | CPNE8          | 144402     | copine VIII /// Copine-8 (Copine VIII). [5 | 9.56E-06 | 1 | 2.97 | 3.20 | 3.29 | 3.33 | 3.16 | 3.06 | 3.15 | 3.06 |
| TC0200026 | CPSF3          | 51692      | cleavage and polyadenylation specific f    | 6.95E-14 | 1 | 4.31 | 5.24 | 5.49 | 5.50 | 5.54 | 5.44 | 5.44 | 5.18 |
| TC1101613 | CPT1A          | 1374       | carnitine palmitoyltransferase 1A (liver   | 0.000272 | 1 | 4.91 | 5.26 | 5.44 | 5.44 | 5.50 | 5.25 | 5.41 | 5.25 |
| TC0101475 | CR1            | 1378       | complement component (3b/4b) recep         | 2.25E-15 | 1 | 8.82 | 9.60 | 9.82 | 9.82 | 9.47 | 9.15 | 9.03 | 8.87 |
| TC0101476 | CR1L /// CR1   | 1379 /// 1 | complement component (3b/4b) recep         | 1.66E-14 | 1 | 4.23 | 4.72 | 4.94 | 4.85 | 4.63 | 4.50 | 4.46 | 4.37 |
| TC0300962 | CRBN           | 51185      | cereblon                                   | 5.49E-16 | 1 | 5.97 | 7.09 | 7.37 | 7.09 | 6.90 | 6.89 | 6.81 | 6.66 |
| TC1000157 | CREM           | 1390       | cAMP responsive element modulator /,       | 1.87E-16 | 1 | 3.50 | 4.61 | 4.15 | 3.99 | 3.93 | 3.89 | 3.83 | 3.81 |
| TC1400637 | CRIP2          | 1397       | cysteine-rich protein 2                    | 1.49E-05 | 1 | 4.84 | 5.10 | 5.08 | 5.04 | 5.09 | 5.07 | 4.98 | 5.00 |
| TC0601314 | CRISP3         | 10321      | cysteine-rich secretory protein 3          | 1.86E-17 | 1 | 4.00 | 8.91 | 7.29 | 7.33 | 8.18 | 8.40 | 7.71 | 6.83 |
| TC2000063 | CRLS1          | 54675      | cardiolipin synthase 1 /// Cardiolipin sy  | 9.46E-11 | 1 | 4.15 | 5.31 | 5.60 | 5.38 | 5.58 | 5.29 | 5.06 | 4.81 |

|           |                |        |                                                    |          |   |      |       |       |       |       |       |      |      |
|-----------|----------------|--------|----------------------------------------------------|----------|---|------|-------|-------|-------|-------|-------|------|------|
| TC0700452 | CROT           | 54677  | carnitine O-octanoyltransferase                    | 0.000382 | 1 | 2.67 | 2.68  | 2.80  | 2.78  | 2.69  | 2.64  | 2.75 | 2.73 |
| TC1500627 | CRTC3          | 64784  | CREB regulated transcription coactivator 3         | 7.08E-16 | 1 | 4.48 | 5.47  | 5.14  | 4.80  | 4.65  | 4.61  | 4.64 | 4.61 |
| TC0800779 | CSGALNACT1 /,  | 55790  | chondroitin sulfate N-acetylgalactosaminase 1      | 1.69E-06 | 1 | 4.86 | 5.64  | 5.54  | 5.62  | 5.75  | 5.61  | 5.49 | 5.20 |
| TC0501395 | CSNK1A1        | 1452   | casein kinase 1, alpha 1                           | 2.43E-06 | 1 | 6.63 | 7.19  | 7.05  | 7.09  | 6.93  | 7.17  | 7.04 | 7.05 |
| TC1300405 | CSNK1A1L       | 122011 | casein kinase 1, alpha 1-like                      | 2.48E-09 | 1 | 5.44 | 5.88  | 6.01  | 5.62  | 5.39  | 5.50  | 5.36 | 5.21 |
| TC1601134 | CSNK2A2        | 1459   | casein kinase 2, alpha prime polypeptide 2         | 7.86E-19 | 1 | 4.97 | 6.66  | 6.53  | 6.55  | 6.43  | 6.22  | 6.26 | 6.03 |
| TC2000142 | CST7           | 8530   | cystatin F (leukocystatin)                         | 6.83E-36 | 1 | 7.50 | 10.33 | 10.75 | 10.69 | 10.49 | 10.07 | 9.94 | 9.37 |
| TC1000987 | CSTF2T         | 23283  | cleavage stimulation factor, 3' pre-RNA processing | 3.96E-09 | 1 | 3.79 | 4.36  | 4.08  | 3.95  | 3.83  | 3.79  | 3.83 | 3.91 |
| TC1800278 | CTDP1          | 9150   | CTD (carboxy-terminal domain, RNA polymerase II)   | 2.23E-08 | 1 | 5.28 | 5.75  | 5.58  | 5.50  | 5.45  | 5.36  | 5.35 | 5.33 |
| TC0500512 | CTNNA1         | 1495   | catenin (cadherin-associated protein), alpha 1     | 4.21E-05 | 1 | 5.46 | 6.09  | 5.87  | 5.86  | 5.68  | 5.66  | 5.70 | 5.59 |
| TC0300189 | CTNNB1         | 1499   | catenin (cadherin-associated protein), beta 1      | 1.94E-06 | 1 | 6.68 | 6.99  | 7.07  | 7.01  | 6.85  | 6.79  | 6.77 | 6.72 |
| TC2000246 | CTNBL1         | 56259  | catenin, beta like 1 /// Beta-catenin-like 1       | 0.000394 | 1 | 5.14 | 5.73  | 5.67  | 5.61  | 5.55  | 5.54  | 5.59 | 5.60 |
| TC1100176 | CTR9           | 9646   | Ctr9, Paf1/RNA polymerase II complex subunit       | 6.37E-05 | 1 | 5.91 | 6.55  | 6.55  | 6.42  | 6.22  | 6.28  | 6.42 | 6.33 |
| TC0800746 | CTSB           | 1508   | cathepsin B                                        | 0.000688 | 1 | 5.20 | 5.69  | 5.69  | 5.93  | 5.72  | 5.53  | 5.61 | 5.59 |
| TC1101065 | CTSD           | 1509   | cathepsin D                                        | 1.36E-07 | 1 | 6.21 | 7.07  | 7.00  | 7.38  | 7.48  | 7.14  | 6.92 | 6.86 |
| TC1501149 | CTSH           | 1512   | cathepsin H                                        | 1.64E-28 | 1 | 4.32 | 6.08  | 5.44  | 5.31  | 5.27  | 4.78  | 4.59 | 4.45 |
| TC0900351 | CTSL1          | 1514   | cathepsin L1 /// Cathepsin L precursor             | 4.41E-05 | 1 | 4.35 | 4.59  | 4.68  | 4.73  | 4.57  | 4.44  | 4.43 | 4.29 |
| TC1001244 | CUEDC2         | 79004  | CUE domain containing 2                            | 5.06E-06 | 1 | 4.78 | 5.05  | 5.22  | 5.29  | 5.21  | 5.10  | 5.19 | 5.08 |
| TC1000882 | CUL2           | 8453   | cullin 2 /// Cullin-2 (CUL-2). [Source:UniProt]    | 2.36E-05 | 1 | 4.53 | 5.07  | 5.11  | 5.08  | 5.04  | 5.07  | 5.07 | 5.01 |
| TC1000503 | CUTC           | 51076  | cutC copper transporter homolog (E. coli)          | 1.58E-10 | 1 | 6.40 | 6.96  | 7.20  | 7.11  | 6.87  | 6.75  | 6.74 | 6.68 |
| TC0700570 | CUX1 /// CUTL1 | 1523   | cut-like homeobox 1 /// Protein CASP. 1            | 3.06E-07 | 1 | 5.95 | 6.54  | 6.46  | 6.48  | 6.47  | 6.33  | 6.30 | 6.20 |
| TC1001219 | CWF19L1        | 55280  | CWF19-like 1, cell cycle control (S. pombe)        | 0.000349 | 1 | 5.19 | 5.60  | 5.69  | 5.58  | 5.46  | 5.32  | 5.44 | 5.33 |
| TC1700939 | CXCL16         | 58191  | chemokine (C-X-C motif) ligand 16                  | 8.91E-07 | 1 | 6.89 | 7.92  | 7.62  | 7.76  | 7.68  | 7.68  | 7.39 | 7.55 |
| TC0X00094 | CXorf58        | 254158 | chromosome X open reading frame 58                 | 8.63E-08 | 1 | 2.09 | 2.35  | 2.31  | 2.22  | 2.15  | 2.10  | 2.12 | 2.12 |
| TC0103136 | CYB5R1         | 51706  | cytochrome b5 reductase 1                          | 3.75E-12 | 1 | 4.88 | 5.10  | 5.52  | 5.46  | 5.35  | 5.15  | 5.05 | 4.98 |
| TC2200728 | CYB5R3         | 1727   | cytochrome b5 reductase 3                          | 2.16E-09 | 1 | 5.57 | 6.26  | 6.24  | 6.29  | 6.29  | 6.08  | 6.01 | 5.97 |
| TC0X00142 | CYBB           | 1536   | cytochrome b-245, beta polypeptide (cyclophilin B) | 2.20E-09 | 1 | 8.02 | 9.83  | 9.55  | 9.53  | 9.74  | 9.68  | 9.37 | 9.18 |
| TC0800619 | CYC1           | 1537   | cytochrome c-1                                     | 2.00E-08 | 1 | 4.49 | 4.99  | 5.11  | 5.04  | 5.02  | 4.85  | 4.77 | 4.68 |
| TC1500019 | CYFIP1         | 23191  | cytoplasmic FMR1 interacting protein 1             | 0.000795 | 1 | 3.73 | 3.91  | 3.86  | 4.00  | 3.89  | 3.80  | 3.83 | 3.74 |
| TC0500643 | CYFIP2         | 26999  | cytoplasmic FMR1 interacting protein 2             | 1.24E-05 | 1 | 7.16 | 7.97  | 7.64  | 7.73  | 7.72  | 7.63  | 7.54 | 7.46 |
| TC1500957 | CYP19A1        | 1588   | cytochrome P450, family 19, subfamily 1A           | 4.14E-13 | 1 | 2.54 | 2.59  | 2.95  | 2.76  | 2.68  | 2.55  | 2.51 | 2.50 |
| TC0201439 | CYP1B1         | 1545   | cytochrome P450, family 1, subfamily E             | 6.71E-20 | 1 | 3.35 | 4.54  | 4.99  | 5.25  | 4.67  | 4.02  | 3.84 | 3.75 |
| TC0201304 | CYS1           | 192668 | cystin 1                                           | 0.000392 | 1 | 5.38 | 5.69  | 5.70  | 5.68  | 5.70  | 5.61  | 5.52 | 5.59 |
| TC2100251 | CYYR1          | 116159 | cysteine/tyrosine-rich 1                           | 7.23E-05 | 1 | 4.18 | 4.55  | 4.75  | 4.63  | 4.76  | 4.75  | 4.69 | 4.44 |

|           |            |                                                     |                                       |          |      |      |      |      |      |      |      |      |
|-----------|------------|-----------------------------------------------------|---------------------------------------|----------|------|------|------|------|------|------|------|------|
| TC1300539 | DACH1      | 1602 dachshund homolog 1 (Drosophila) ///           | 1.28E-16                              | 1        | 4.87 | 6.23 | 6.37 | 6.70 | 6.50 | 6.17 | 6.13 | 5.78 |
| TC1100462 | DAGLA      | 747 diacylglycerol lipase, alpha                    | 0.000534                              | 1        | 4.40 | 4.54 | 4.57 | 4.45 | 4.51 | 4.47 | 4.46 | 4.45 |
| TC0201959 | DARS       | 1615 aspartyl-tRNA synthetase                       | 8.07E-15                              | 1        | 5.16 | 6.63 | 6.58 | 6.53 | 6.64 | 6.64 | 6.49 | 6.33 |
| TC0700218 | DBNL       | 28988 drebrin-like                                  | 3.02E-06                              | 1        | 6.33 | 6.75 | 6.63 | 6.54 | 6.48 | 6.38 | 6.25 | 6.32 |
| TC0500398 | DCP2       | 167227 DCP2 decapping enzyme homolog (S. cr         | 0.000146                              | 1        | 7.99 | 8.30 | 8.48 | 8.41 | 8.26 | 8.32 | 8.20 | 8.20 |
| TC1100989 | DCPS       | 28960 decapping enzyme, scavenger                   | 9.90E-05                              | 1        | 4.85 | 5.26 | 5.27 | 5.21 | 5.34 | 5.28 | 5.28 | 5.09 |
| TC1201324 | DCTN2      | 10540 dynactin 2 (p50)                              | 8.10E-07                              | 1        | 6.53 | 7.07 | 7.11 | 7.13 | 7.05 | 6.97 | 6.88 | 6.80 |
| TC0800185 | DCTN6      | 10671 dynactin 6                                    | 2.21E-13                              | 1        | 4.56 | 5.91 | 5.42 | 5.35 | 5.32 | 5.22 | 5.22 | 5.22 |
| TC1600925 | DCUN1D3    | 123879 DCN1, defective in cullin neddylation 1,     | 1.55E-07                              | 1        | 4.47 | 5.35 | 5.06 | 5.10 | 4.88 | 4.82 | 4.75 | 4.87 |
| TC0601132 | DDAH2 ///  | CLIC 23564 ///                                      | dimethylarginine dimethylaminohydrol  | 6.01E-08 | 1    | 5.87 | 6.34 | 6.39 | 6.42 | 6.33 | 6.16 | 6.00 |
| TC1000328 | DDIT4      | 54541 DNA-damage-inducible transcript 4             | 5.40E-05                              | 1        | 3.86 | 4.35 | 4.17 | 4.14 | 4.12 | 4.13 | 4.02 | 4.08 |
| TC1600564 | DDX19A /// | DD 55308 ///                                        | DEAD (Asp-Glu-Ala-As) box polypeptide | 0.000139 | 1    | 4.70 | 5.14 | 4.91 | 4.91 | 4.99 | 4.94 | 5.02 |
| TC1700681 | DDX42      | 11325 DEAD (Asp-Glu-Ala-Asp) box polypeptic         | 5.49E-09                              | 1        | 6.05 | 6.79 | 6.57 | 6.37 | 6.26 | 6.24 | 6.31 | 6.19 |
| TC0103110 | DDX59      | 83479 DEAD (Asp-Glu-Ala-Asp) box polypeptic         | 3.73E-08                              | 1        | 5.95 | 6.26 | 6.57 | 6.48 | 6.36 | 6.38 | 6.40 | 6.27 |
| TC0102933 | DEDD       | 9191 death effector domain containing ///           | D 9.46E-06                            | 1        | 5.82 | 6.22 | 6.16 | 6.16 | 6.01 | 6.00 | 5.89 | 5.95 |
| TC0800676 | DEFA5      | 1670 defensin, alpha 5, Paneth cell-specific        | 3.43E-05                              | 1        | 4.55 | 4.82 | 4.73 | 4.63 | 4.64 | 4.61 | 4.56 | 4.47 |
| TC2000653 | DEFB121    | 245934 defensin, beta 121 ///                       | Beta-defensin 12 5.06E-05             | 1        | 2.44 | 2.96 | 2.89 | 2.68 | 2.76 | 2.68 | 2.64 | 2.83 |
| TC0101547 | DEGS1      | 8560 degenerative spermatocyte homolog 1,           | 2.82E-14                              | 1        | 6.10 | 6.77 | 6.80 | 6.59 | 6.69 | 6.72 | 6.65 | 6.65 |
| TC0103098 | DENND1B    | 163486 // DENN/MADD domain containing 1B ///        | 5.02E-10                              | 1        | 4.08 | 4.86 | 4.77 | 4.87 | 4.64 | 4.65 | 4.73 | 4.70 |
| TC0102537 | DENND2D    | 79961 DENN/MADD domain containing 2D ///            | 6.03E-11                              | 1        | 4.86 | 5.33 | 5.26 | 5.00 | 5.12 | 5.04 | 5.00 | 4.96 |
| TC1200170 | DERA       | 51071 2-deoxyribose-5-phosphate aldolase hc         | 1.31E-10                              | 1        | 4.00 | 4.50 | 4.75 | 4.80 | 4.66 | 4.60 | 4.66 | 4.49 |
| TC1700957 | DERL2      | 51009 Der1-like domain family, member 2             | 9.07E-05                              | 1        | 5.61 | 5.86 | 6.05 | 5.90 | 5.85 | 5.94 | 6.01 | 5.97 |
| TC1100678 | DGAT2      | 84649 diacylglycerol O-acyltransferase homol        | 8.13E-06                              | 1        | 6.35 | 6.92 | 6.92 | 6.81 | 6.64 | 6.64 | 6.49 | 6.50 |
| TC0201200 | DGKD       | 8527 diacylglycerol kinase, delta 130kDa            | 2.21E-10                              | 1        | 5.64 | 6.43 | 6.35 | 6.39 | 6.42 | 6.15 | 6.19 | 5.99 |
| TC0200350 | DGUOK      | 1716 deoxyguanosine kinase ///                      | Deoxyguanc 5.76E-05                   | 1        | 5.81 | 6.29 | 6.23 | 6.22 | 6.14 | 6.11 | 6.19 | 6.15 |
| TC1101627 | DHCR7      | 1717 7-dehydrocholesterol reductase                 | 1.52E-11                              | 1        | 4.40 | 5.53 | 5.08 | 4.88 | 5.06 | 4.84 | 4.59 | 4.52 |
| TC0301384 | DHFRL1     | 200895 dihydrofolate reductase-like 1               | 4.76E-07                              | 1        | 3.61 | 3.70 | 3.93 | 3.97 | 3.90 | 3.76 | 3.72 | 3.82 |
| TC1400895 | DHRS7      | 51635 dehydrogenase/reductase (SDR family)          | 4.38E-09                              | 1        | 8.31 | 8.43 | 8.77 | 8.69 | 8.63 | 8.58 | 8.55 | 8.55 |
| TC1700252 | DHRS7B     | 25979 dehydrogenase/reductase (SDR family)          | 0.000197                              | 1        | 4.62 | 4.98 | 5.05 | 4.95 | 4.90 | 4.86 | 4.88 | 4.84 |
| TC0200838 | DHRS9      | 10170 dehydrogenase/reductase (SDR family)          | 0.000102                              | 1        | 5.40 | 5.68 | 6.16 | 5.51 | 5.33 | 5.31 | 5.48 | 5.60 |
| TC0Y00113 | DHRSX ///  | ZBEI 207063 // dehydrogenase/reductase (SDR family) | 0.000198                              | 1        | 6.44 | 6.72 | 6.56 | 6.51 | 6.47 | 6.51 | 6.49 | 6.60 |
| TC0X00733 | DHRSX ///  | ZBEI 207063 // dehydrogenase/reductase (SDR family) | 0.000768                              | 1        | 6.08 | 6.38 | 6.25 | 6.21 | 6.18 | 6.21 | 6.19 | 6.28 |
| TC0301682 | DHX36      | 170506 DEAH (Asp-Glu-Ala-His) box polypeptid        | 9.22E-10                              | 1        | 5.36 | 6.55 | 6.43 | 6.26 | 6.11 | 6.13 | 6.23 | 6.04 |
| TC0501360 | DIAPH1     | 1729 diaphanous homolog 1 (Drosophila) ///          | 0.000284                              | 1        | 7.01 | 7.39 | 7.14 | 7.14 | 7.07 | 7.01 | 6.97 | 6.96 |

|           |              |                                                 |                     |   |      |      |      |      |      |      |      |      |
|-----------|--------------|-------------------------------------------------|---------------------|---|------|------|------|------|------|------|------|------|
| TC0X00410 | DIAPH2       | 1730 diaphanous homolog 2 (Drosophila) ///      | 4.65E-12            | 1 | 3.72 | 5.05 | 5.03 | 5.27 | 5.20 | 5.00 | 5.00 | 4.68 |
| TC0300558 | DIRC2        | 84925 disrupted in renal carcinoma 2 ///        | Disru 2.06E-13      | 1 | 6.59 | 7.44 | 7.44 | 7.31 | 7.14 | 7.00 | 6.80 | 6.66 |
| TC1101551 | DKFZp761E198 | 91056 DKFZp761E198 protein                      | 3.94E-05            | 1 | 5.77 | 6.19 | 6.08 | 6.03 | 6.07 | 6.08 | 6.03 | 6.05 |
| TC0800765 | DLC1         | 10395 deleted in liver cancer 1                 | 3.11E-14            | 1 | 3.07 | 3.13 | 3.46 | 3.18 | 3.12 | 3.06 | 3.02 | 3.03 |
| TC0700612 | DLD          | 1738 dihydrolipoamide dehydrogenase             | 2.66E-08            | 1 | 6.41 | 7.20 | 7.21 | 7.02 | 6.98 | 6.98 | 6.96 | 6.83 |
| TC2000234 | DLGAP4       | 22839 discs, large (Drosophila) homolog-associ  | 0.000703            | 1 | 5.44 | 5.61 | 5.57 | 5.56 | 5.51 | 5.45 | 5.45 | 5.46 |
| TC0900122 | DNAJA1       | 3301 Dnaj (Hsp40) homolog, subfamily A, mem     | 1.30E-05            | 1 | 8.29 | 8.74 | 8.76 | 8.70 | 8.54 | 8.69 | 8.70 | 8.77 |
| TC1601076 | DNAJA2       | 10294 Dnaj (Hsp40) homolog, subfamily A, mem    | 6.56E-20            | 1 | 6.42 | 7.07 | 7.17 | 7.19 | 7.07 | 7.00 | 6.91 | 6.95 |
| TC0300871 | DNAJB11      | 51726 Dnaj (Hsp40) homolog, subfamily B, mem    | 5.33E-07            | 1 | 6.40 | 7.44 | 7.08 | 7.00 | 6.98 | 6.97 | 7.12 | 6.98 |
| TC0300627 | DNAJC13      | 23317 Dnaj (Hsp40) homolog, subfamily C, mem    | 3.88E-09            | 1 | 5.69 | 6.60 | 6.94 | 6.82 | 6.87 | 6.65 | 6.65 | 6.22 |
| TC0100166 | DNAJC16      | 23341 Dnaj (Hsp40) homolog, subfamily C, mem    | 3.98E-05            | 1 | 4.41 | 4.82 | 4.79 | 4.73 | 4.70 | 4.64 | 4.63 | 4.58 |
| TC1100508 | DNAJC4       | 3338 Dnaj (Hsp40) homolog, subfamily C, mem     | 9.10E-20            | 1 | 4.51 | 4.92 | 4.96 | 5.01 | 4.91 | 4.69 | 4.63 | 4.61 |
| TC2000468 | DNAJC5       | 80331 Dnaj (Hsp40) homolog, subfamily C, mem    | 1.47E-13            | 1 | 6.08 | 6.76 | 6.63 | 6.64 | 6.68 | 6.53 | 6.38 | 6.30 |
| TC0X01383 | DNASE1L1     | 1774 deoxyribonuclease I-like 1                 | 3.18E-06            | 1 | 5.30 | 5.42 | 5.55 | 5.50 | 5.46 | 5.41 | 5.33 | 5.32 |
| TC1001215 | DNMBP        | 23268 dynamin binding protein ///               | Dynamint 7.05E-05   | 1 | 4.06 | 4.68 | 4.17 | 4.22 | 4.38 | 4.34 | 4.33 | 4.17 |
| TC0102451 | DNTTIP2      | 30836 deoxynucleotidyltransferase, terminal,    | 5.94E-11            | 1 | 5.68 | 6.82 | 6.70 | 6.53 | 6.38 | 6.29 | 6.38 | 6.28 |
| TC1300609 | DOCK9        | 23348 dedicator of cytokinesis 9 ///            | Dedicator 2.36E-06  | 1 | 3.23 | 3.64 | 3.57 | 3.38 | 3.41 | 3.30 | 3.29 | 3.21 |
| TC1900052 | DOT1L        | 84444 DOT1-like, histone H3 methyltransferase   | 4.86E-06            | 1 | 4.74 | 5.18 | 4.98 | 4.96 | 5.06 | 4.94 | 4.92 | 4.86 |
| TC0102487 | DPH5         | 51611 DPH5 homolog (S. cerevisiae) ///          | Proba 9.45E-22      | 1 | 3.76 | 4.74 | 4.91 | 4.50 | 4.32 | 4.13 | 4.12 | 3.93 |
| TC0301434 | DPPA2        | 151871 developmental pluripotency associated    | 0.000401            | 1 | 2.29 | 2.39 | 2.46 | 2.31 | 2.33 | 2.30 | 2.25 | 2.29 |
| TC1900402 | DPY19L3      | 147991 dpy-19-like 3 (C. elegans) ///           | dpy-19-lik 4.90E-17 | 1 | 4.37 | 5.19 | 5.82 | 5.24 | 5.07 | 4.89 | 4.79 | 4.55 |
| TC0201416 | DPY30 ///    | MEN 732129 // dpy-30 homolog (C. elegans) ///   | mediat 2.89E-08     | 1 | 5.61 | 5.97 | 6.05 | 6.03 | 6.00 | 5.96 | 5.94 | 5.93 |
| TC0102472 | DPYD         | 1806 dihydropyrimidine dehydrogenase ///        | l 1.26E-12          | 1 | 6.92 | 7.39 | 7.55 | 7.31 | 7.05 | 7.00 | 6.96 | 6.85 |
| TC0100736 | DR1          | 1810 down-regulator of transcription 1, TBP-    | 5.83E-22            | 1 | 5.79 | 6.69 | 6.91 | 6.81 | 6.75 | 6.64 | 6.57 | 6.54 |
| TC1200639 | DRAM         | 55332 damage-regulated autophagy modulator      | 1.97E-21            | 1 | 5.24 | 6.52 | 6.93 | 6.82 | 6.57 | 6.35 | 6.25 | 6.10 |
| TC0600661 | DSE          | 29940 dermatan sulfate epimerase                | 1.44E-17            | 1 | 5.34 | 6.28 | 6.47 | 6.30 | 6.04 | 5.91 | 5.76 | 5.56 |
| TC0600966 | DTNBP1       | 84062 dystrobrevin binding protein 1 ///        | Dystb 4.06E-07      | 1 | 5.37 | 6.08 | 6.06 | 5.89 | 5.65 | 5.79 | 5.86 | 5.79 |
| TC1200998 | DUSP16       | 80824 dual specificity phosphatase 16 ///       | Dua 2.46E-06        | 1 | 6.05 | 6.63 | 6.66 | 6.73 | 6.60 | 6.48 | 6.30 | 6.26 |
| TC0600002 | DUSP22       | 56940 dual specificity phosphatase 22           | 1.05E-09            | 1 | 6.47 | 6.88 | 6.85 | 6.84 | 6.74 | 6.66 | 6.60 | 6.52 |
| TC1701408 | DUSP3        | 1845 dual specificity phosphatase 3             | 2.89E-05            | 1 | 4.57 | 5.34 | 5.27 | 5.41 | 5.24 | 5.28 | 5.30 | 5.26 |
| TC1800465 | DYM          | 54808 dymeclin                                  | 4.94E-11            | 1 | 5.61 | 6.22 | 6.26 | 6.05 | 6.02 | 5.90 | 5.89 | 5.85 |
| TC0200859 | DYNC1I2      | 1781 dynein, cytoplasmic 1, intermediate chain  | 1.12E-18            | 1 | 4.42 | 6.65 | 6.59 | 6.10 | 6.21 | 6.05 | 5.98 | 5.60 |
| TC0200208 | DYNC2L1      | 51626 dynein, cytoplasmic 2, light intermediate | 2.00E-12            | 1 | 2.37 | 2.88 | 3.19 | 2.96 | 2.85 | 2.53 | 2.53 | 2.44 |
| TC0X00845 | DYNLT3       | 6990 dynein, light chain, Tctex-type 3 ///      | Dyr 7.22E-24        | 1 | 4.49 | 6.24 | 5.68 | 5.36 | 5.35 | 5.24 | 5.22 | 5.23 |



|           |               |                                                   |          |   |      |      |      |      |      |      |      |      |
|-----------|---------------|---------------------------------------------------|----------|---|------|------|------|------|------|------|------|------|
| TC1200034 | DYRK4         | 8798 dual-specificity tyrosine-(Y)-phosphoryl     | 6.15E-05 | 1 | 2.92 | 3.18 | 3.28 | 3.04 | 3.14 | 3.15 | 3.06 | 2.99 |
| TC0200337 | DYSF          | 8291 dysferlin, limb girdle muscular dystroph     | 3.56E-12 | 1 | 7.56 | 8.45 | 8.51 | 8.42 | 8.23 | 7.86 | 7.71 | 7.58 |
| TC0300483 | DZIP3         | 9666 DAZ interacting protein 3, zinc finger       | 5.85E-06 | 1 | 2.92 | 3.01 | 3.20 | 3.11 | 3.01 | 2.95 | 2.98 | 2.99 |
| TC0101979 | E2F2          | 1870 E2F transcription factor 2                   | 1.32E-08 | 1 | 4.91 | 5.53 | 5.33 | 5.23 | 5.31 | 5.20 | 5.06 | 4.92 |
| TC0600112 | E2F3          | 1871 E2F transcription factor 3 /// Transcript    | 5.25E-05 | 1 | 6.60 | 7.20 | 7.16 | 7.20 | 7.13 | 7.12 | 6.91 | 6.86 |
| TC0300546 | EAF2          | 55840 ELL associated factor 2                     | 6.82E-10 | 1 | 4.98 | 5.90 | 6.30 | 6.27 | 6.22 | 6.18 | 6.15 | 5.92 |
| TC2000029 | EBF4          | 57593 early B-cell factor 4 /// early B-cell fact | 0.000986 | 1 | 4.52 | 4.70 | 4.68 | 4.65 | 4.68 | 4.65 | 4.57 | 4.61 |
| TC1300482 | EBPL          | 84650 emopamil binding protein-like /// Emo       | 7.41E-17 | 1 | 4.36 | 4.99 | 5.32 | 5.09 | 4.98 | 4.92 | 4.93 | 4.67 |
| TC1000054 | ECHDC3        | 79746 enoyl Coenzyme A hydratase domain c         | 0.000347 | 1 | 4.31 | 4.65 | 4.57 | 4.46 | 4.43 | 4.42 | 4.41 | 4.39 |
| TC0701215 | ECOP /// NM_C | 81552 EGFR-coamplified and overexpressed p        | 4.96E-12 | 1 | 5.31 | 5.69 | 5.80 | 5.82 | 5.70 | 5.58 | 5.58 | 5.56 |
| TC1201448 | EEA1          | 8411 early endosome antigen 1                     | 8.30E-09 | 1 | 4.31 | 5.26 | 5.48 | 5.37 | 5.28 | 5.18 | 5.42 | 5.11 |
| TC1100724 | EED           | 8726 embryonic ectoderm development ///           | 9.16E-05 | 1 | 3.84 | 4.22 | 4.38 | 4.30 | 4.34 | 4.35 | 4.39 | 4.19 |
| TC0801314 | EEF1D         | 1936 eukaryotic translation elongation facto      | 7.10E-07 | 1 | 6.08 | 6.42 | 6.32 | 6.25 | 6.29 | 6.30 | 6.25 | 6.24 |
| TC0100614 | EFCAB7        | 84455 EF-hand calcium binding domain 7            | 0.00087  | 1 | 2.96 | 3.31 | 3.29 | 3.40 | 3.38 | 3.32 | 3.23 | 3.19 |
| TC1300334 | EFHA1         | 221154 EF-hand domain family, member A1           | 8.71E-06 | 1 | 4.78 | 5.28 | 5.30 | 5.17 | 4.96 | 5.07 | 5.19 | 5.16 |
| TC0X00869 | EFHC2         | 80258 EF-hand domain (C-terminal) containin       | 0.000279 | 1 | 3.19 | 3.59 | 3.25 | 2.99 | 3.25 | 3.42 | 3.36 | 3.32 |
| TC0100163 | EFHD2         | 79180 EF-hand domain family, member D2 ///        | 7.65E-06 | 1 | 7.45 | 7.91 | 8.01 | 8.11 | 8.01 | 8.03 | 7.92 | 7.94 |
| TC0500509 | EGR1          | 1958 early growth response 1                      | 2.11E-05 | 1 | 5.03 | 6.80 | 6.31 | 6.46 | 6.82 | 6.81 | 6.48 | 6.53 |
| TC0300181 | EIF1B         | 10289 eukaryotic translation initiation factor :  | 1.70E-08 | 1 | 7.08 | 7.83 | 8.00 | 7.82 | 7.67 | 7.72 | 7.72 | 7.70 |
| TC0201431 | EIF2AK2       | 5610 eukaryotic translation initiation factor :   | 4.45E-08 | 1 | 6.52 | 7.81 | 7.38 | 7.09 | 7.14 | 7.45 | 7.66 | 7.61 |
| TC1400374 | EIF2B2        | 8892 eukaryotic translation initiation factor :   | 2.90E-06 | 1 | 4.43 | 4.91 | 4.97 | 5.03 | 4.98 | 4.88 | 4.85 | 4.77 |
| TC2000676 | EIF2S2        | 8894 eukaryotic translation initiation factor :   | 1.96E-05 | 1 | 6.42 | 7.01 | 6.93 | 6.94 | 6.91 | 6.93 | 7.01 | 6.87 |
| TC1100149 | EIF3F         | 8665 eukaryotic translation initiation factor :   | 4.36E-08 | 1 | 5.26 | 6.19 | 6.11 | 6.21 | 6.23 | 6.18 | 6.24 | 6.04 |
| TC0100357 | EIF3I         | 8668 eukaryotic translation initiation factor :   | 1.30E-09 | 1 | 4.89 | 6.04 | 5.71 | 5.65 | 5.90 | 5.65 | 5.59 | 5.32 |
| TC0301340 | EIF4E3        | 317649 eukaryotic translation initiation factor : | 7.02E-09 | 1 | 7.29 | 7.89 | 7.91 | 7.95 | 7.84 | 7.78 | 7.62 | 7.64 |
| TC1101206 | EIF4G2        | 1982 eukaryotic translation initiation factor :   | 0.000867 | 1 | 8.30 | 8.48 | 8.57 | 8.59 | 8.53 | 8.52 | 8.51 | 8.50 |
| TC0101960 | EIF4G3        | 8672 eukaryotic translation initiation factor :   | 6.34E-07 | 1 | 6.59 | 7.49 | 7.25 | 7.12 | 7.15 | 7.09 | 7.19 | 6.98 |
| TC2000693 | EIF6          | 3692 eukaryotic translation initiation factor (   | 5.97E-08 | 1 | 4.56 | 5.11 | 5.20 | 5.12 | 5.08 | 5.02 | 5.00 | 4.99 |
| TC2000798 | ELMO2         | 63916 engulfment and cell motility 2 /// Engu     | 1.12E-06 | 1 | 6.00 | 6.73 | 6.74 | 6.64 | 6.39 | 6.32 | 6.41 | 6.25 |
| TC0500969 | EMB           | 133418 embigin homolog (mouse)                    | 1.35E-31 | 1 | 5.62 | 7.75 | 7.89 | 7.79 | 7.85 | 7.63 | 7.33 | 6.99 |
| TC1800015 | EMILIN2       | 84034 elastin microfibril interfacer 2 /// EMILI  | 7.65E-19 | 1 | 5.16 | 5.70 | 5.99 | 6.08 | 5.96 | 5.74 | 5.65 | 5.49 |
| TC1901600 | EML2          | 24139 echinoderm microtubule associated pr        | 0.000281 | 1 | 4.81 | 4.99 | 4.99 | 4.94 | 4.93 | 4.91 | 4.88 | 4.85 |
| TC1900120 | EMR1          | 2015 egf-like module containing, mucin-like,      | 4.05E-05 | 1 | 7.05 | 8.05 | 7.98 | 8.15 | 7.69 | 7.32 | 7.54 | 7.39 |
| TC0101830 | ENO1          | 2023 enolase 1, (alpha)                           | 6.09E-24 | 1 | 6.70 | 8.48 | 8.72 | 8.81 | 8.69 | 8.21 | 7.96 | 7.56 |

|           |                          |        |                                              |          |   |      |      |      |      |      |      |      |      |
|-----------|--------------------------|--------|----------------------------------------------|----------|---|------|------|------|------|------|------|------|------|
| TC0600431 | ENPP4                    | 22875  | ectonucleotide pyrophosphatase/phos          | 6.34E-08 | 1 | 3.70 | 5.21 | 4.87 | 4.81 | 5.32 | 5.06 | 4.87 | 4.37 |
| TC0102725 | ENSA                     | 2029   | endosulfine alpha /// Alpha-endosulfin       | 2.38E-07 | 1 | 5.88 | 6.37 | 6.24 | 6.19 | 6.22 | 6.19 | 6.29 | 6.19 |
| TC1000502 | ENTPD7                   | 57089  | ectonucleoside triphosphate diphosph         | 1.25E-24 | 1 | 4.58 | 6.90 | 7.31 | 6.32 | 6.05 | 5.44 | 5.27 | 4.98 |
| TC0800500 | ENY2                     | 56943  | enhancer of yellow 2 homolog (Drosop         | 2.17E-12 | 1 | 7.01 | 7.94 | 8.07 | 7.79 | 7.86 | 7.82 | 7.74 | 7.63 |
| TC0102250 | EPS15                    | 2060   | epidermal growth factor receptor path        | 1.86E-10 | 1 | 6.78 | 7.37 | 7.38 | 7.25 | 7.17 | 7.19 | 7.20 | 7.16 |
| TC0700234 | EPS15L2                  | ---    | ---                                          | 0.000534 | 1 | 2.26 | 2.68 | 2.78 | 2.56 | 2.63 | 2.63 | 2.70 | 2.72 |
| TC1700631 | EPX                      | 8288   | eosinophil peroxidase                        | 3.07E-05 | 1 | 3.79 | 4.13 | 3.88 | 3.86 | 3.97 | 3.86 | 3.80 | 3.84 |
| TC1200008 | ERC1                     | 23085  | ELKS/RAB6-interacting/CAST family me         | 9.65E-05 | 1 | 5.36 | 5.72 | 5.60 | 5.85 | 5.80 | 5.60 | 5.74 | 5.54 |
| TC1201070 | ERGIC2                   | 51290  | ERGIC and golgi 2 /// Endoplasmic retic      | 4.71E-09 | 1 | 6.82 | 7.73 | 7.78 | 7.64 | 7.52 | 7.67 | 7.49 | 7.37 |
| TC1400950 | ERH                      | 2079   | enhancer of rudimentary homolog (Drc         | 4.80E-09 | 1 | 6.02 | 6.45 | 7.00 | 6.79 | 6.70 | 6.53 | 6.60 | 6.43 |
| TC1001218 | ERLIN1 /// CHL 10613 /// |        | ER lipid raft associated 1 /// conserved     | 9.65E-14 | 1 | 5.79 | 6.91 | 6.80 | 6.64 | 6.51 | 6.53 | 6.54 | 6.39 |
| TC0800220 | ERLIN2                   | 11160  | ER lipid raft associated 2                   | 5.12E-08 | 1 | 4.63 | 5.06 | 5.53 | 5.20 | 5.16 | 5.10 | 5.15 | 5.01 |
| TC0100454 | ERMAP                    | 114625 | erythroblast membrane-associated pro         | 2.99E-06 | 1 | 3.91 | 4.00 | 4.07 | 4.09 | 4.11 | 3.99 | 4.00 | 3.89 |
| TC1400862 | ERO1L                    | 30001  | ERO1-like (S. cerevisiae)                    | 0.000137 | 1 | 6.97 | 7.66 | 7.82 | 7.61 | 7.52 | 7.62 | 7.53 | 7.38 |
| TC1300464 | ESD                      | 2098   | esterase D/formylglutathione hydrolas        | 4.67E-23 | 1 | 4.21 | 5.61 | 5.92 | 5.87 | 5.88 | 5.69 | 5.64 | 5.42 |
| TC0501324 | ETF1                     | 2107   | eukaryotic translation termination fact      | 2.73E-10 | 1 | 6.10 | 7.01 | 6.68 | 6.64 | 6.65 | 6.57 | 6.49 | 6.48 |
| TC0400640 | ETFDH                    | 2110   | electron-transferring-flavoprotein dehy      | 0.000704 | 1 | 4.31 | 4.64 | 4.75 | 4.65 | 4.69 | 4.52 | 4.58 | 4.44 |
| TC1200192 | ETNK1                    | 55500  | ethanolamine kinase 1 /// Ethanolamin        | 7.23E-09 | 1 | 4.58 | 5.09 | 5.11 | 5.00 | 4.83 | 4.83 | 4.83 | 4.82 |
| TC2100125 | ETS2                     | 2114   | v-ets erythroblastosis virus E26 oncoge      | 3.94E-24 | 1 | 6.86 | 8.40 | 8.14 | 8.15 | 7.92 | 7.68 | 7.49 | 7.29 |
| TC0600894 | EXOC2                    | 55770  | exocyst complex component 2                  | 3.68E-06 | 1 | 3.99 | 4.53 | 4.43 | 4.50 | 4.40 | 4.29 | 4.32 | 4.13 |
| TC1400882 | EXOC5                    | 648110 | // exocyst complex component 5               | 4.82E-14 | 1 | 5.13 | 6.27 | 6.34 | 6.30 | 6.22 | 6.21 | 6.24 | 6.02 |
| TC1000449 | EXOC6 /// Q6Z            | 54536  | exocyst complex component 6 /// Exoc         | 1.03E-19 | 1 | 6.45 | 7.34 | 7.74 | 7.54 | 7.25 | 7.17 | 7.10 | 6.96 |
| TC0900917 | EXOSC3                   | 51010  | exosome component 3                          | 8.82E-11 | 1 | 5.43 | 6.42 | 6.37 | 6.28 | 6.43 | 6.52 | 6.43 | 6.28 |
| TC0800617 | EXOSC4                   | 54512  | exosome component 4                          | 4.86E-23 | 1 | 5.40 | 6.96 | 7.16 | 6.83 | 6.68 | 6.13 | 5.84 | 5.66 |
| TC0801208 | EXT1                     | 2131   | exostoses (multiple) 1                       | 4.42E-21 | 1 | 4.83 | 6.56 | 6.82 | 6.64 | 5.94 | 5.92 | 5.88 | 5.56 |
| TC0601718 | EZR /// VIL2             | 7430   | ezrin /// Ezrin (p81) (Cytovillin) (Villin-2 | 2.78E-10 | 1 | 5.84 | 6.84 | 6.60 | 6.73 | 6.75 | 6.72 | 6.70 | 6.52 |
| TC0102460 | F3                       | 2152   | coagulation factor III (thromboplastin, f    | 8.15E-05 | 1 | 3.33 | 3.60 | 3.56 | 3.44 | 3.51 | 3.45 | 3.34 | 3.47 |
| TC0102980 | F5                       | 2153   | coagulation factor V (proaccelerin, labi     | 5.86E-08 | 1 | 6.74 | 8.03 | 7.91 | 7.99 | 7.65 | 7.39 | 7.35 | 7.15 |
| TC0X01399 | F8                       | 2157   | coagulation factor VIII, procoagulant cc     | 2.86E-08 | 1 | 2.94 | 2.98 | 3.14 | 3.03 | 2.99 | 2.97 | 2.88 | 2.95 |
| TC0X01404 | F8A1                     | 8263   | coagulation factor VIII-associated (intrc    | 1.63E-14 | 1 | 7.21 | 7.87 | 8.09 | 8.01 | 8.03 | 7.96 | 8.04 | 7.93 |
| TC0X00721 | F8A1                     | 8263   | coagulation factor VIII-associated (intrc    | 5.84E-07 | 1 | 7.61 | 8.00 | 8.30 | 8.17 | 8.22 | 8.15 | 8.20 | 8.12 |
| TC0401217 | FABP2                    | 2169   | fatty acid binding protein 2, intestinal     | 2.60E-05 | 1 | 2.46 | 3.08 | 3.58 | 3.41 | 3.22 | 2.80 | 2.84 | 2.65 |
| TC0300655 | FAIM                     | 55179  | Fas apoptotic inhibitory molecule            | 0.000511 | 1 | 2.64 | 2.73 | 2.83 | 2.79 | 2.84 | 2.75 | 2.74 | 2.71 |
| TC1700875 | FAM101B                  | 359845 | family with sequence similarity 101, me      | 4.48E-09 | 1 | 5.89 | 7.20 | 6.69 | 7.01 | 7.36 | 7.14 | 6.82 | 6.73 |

|           |                         |                                                |          |   |      |      |      |      |      |      |      |      |
|-----------|-------------------------|------------------------------------------------|----------|---|------|------|------|------|------|------|------|------|
| TC0100788 | FAM102B                 | 284611 family with sequence similarity 102, m  | 5.41E-14 | 1 | 4.24 | 5.83 | 5.52 | 5.72 | 5.67 | 5.31 | 5.28 | 5.00 |
| TC0X00961 | FAM104B                 | 90736 family with sequence similarity 104, m   | 1.40E-05 | 1 | 4.96 | 5.24 | 5.32 | 5.34 | 5.31 | 5.32 | 5.30 | 5.27 |
| TC0500055 | FAM105A                 | 54491 family with sequence similarity 105, m   | 5.87E-21 | 1 | 5.15 | 6.72 | 7.00 | 6.55 | 6.62 | 6.17 | 5.96 | 5.65 |
| TC1000778 | FAM107B                 | 83641 family with sequence similarity 107, m   | 5.36E-10 | 1 | 5.72 | 6.26 | 6.32 | 6.34 | 6.40 | 6.26 | 6.18 | 6.08 |
| TC1500544 | FAM108C1                | 58489 family with sequence similarity 108, m   | 6.66E-08 | 1 | 3.43 | 4.73 | 4.30 | 4.31 | 4.43 | 4.44 | 4.38 | 4.01 |
| TC0800323 | FAM110B                 | 90362 family with sequence similarity 110, m   | 2.93E-06 | 1 | 4.17 | 4.53 | 4.50 | 4.45 | 4.44 | 4.42 | 4.31 | 4.38 |
| TC1200275 | FAM113B                 | 91523 family with sequence similarity 113, m   | 1.40E-08 | 1 | 3.72 | 3.99 | 4.08 | 3.82 | 3.84 | 3.86 | 3.82 | 3.78 |
| TC0501435 | FAM114A2                | 10827 family with sequence similarity 114, m   | 1.48E-09 | 1 | 4.00 | 4.90 | 4.93 | 4.67 | 4.62 | 4.62 | 4.66 | 4.58 |
| TC0700825 | FAM115C                 | 285966 family with sequence similarity 115, m  | 3.32E-09 | 1 | 5.11 | 5.49 | 5.43 | 5.41 | 5.16 | 5.17 | 5.16 | 5.15 |
| TC0900281 | FAM122A                 | 116224 family with sequence similarity 122A    | 4.13E-05 | 1 | 5.00 | 5.44 | 5.63 | 5.54 | 5.50 | 5.57 | 5.46 | 5.39 |
| TC0900567 | FAM125B                 | 89853 family with sequence similarity 125, m   | 3.11E-14 | 1 | 4.06 | 4.89 | 4.86 | 4.90 | 5.02 | 4.81 | 4.74 | 4.46 |
| TC0202217 | FAM126B                 | 285172 family with sequence similarity 126, m  | 4.35E-05 | 1 | 8.10 | 8.44 | 8.47 | 8.56 | 8.39 | 8.29 | 8.18 | 8.16 |
| TC0X00579 | FAM127A                 | 8933 family with sequence similarity 127, m    | 1.98E-08 | 1 | 4.48 | 5.78 | 5.85 | 5.77 | 5.75 | 5.46 | 5.73 | 5.44 |
| TC0X01274 | FAM127B                 | 26071 family with sequence similarity 127, m   | 0.000577 | 1 | 4.21 | 4.41 | 4.53 | 4.48 | 4.57 | 4.48 | 4.52 | 4.39 |
| TC1201207 | FAM130A1                | 81566 family with sequence similarity 130, m   | 0.000722 | 1 | 4.91 | 5.09 | 5.14 | 5.15 | 5.07 | 5.04 | 5.10 | 5.07 |
| TC0500867 | FAM134B                 | 54463 family with sequence similarity 134, m   | 4.83E-08 | 1 | 3.64 | 4.02 | 4.13 | 4.19 | 4.08 | 3.79 | 3.76 | 3.80 |
| TC1701384 | FAM134C                 | 162427 family with sequence similarity 134, m  | 2.39E-07 | 1 | 5.70 | 6.16 | 6.13 | 6.11 | 6.07 | 6.01 | 5.91 | 5.89 |
| TC1401091 | FAM14A                  | 83982 family with sequence similarity 14, mer  | 8.22E-08 | 1 | 5.57 | 5.97 | 5.98 | 6.06 | 6.21 | 5.97 | 5.96 | 5.94 |
| TC0201265 | FAM150B /// N           | 285016 family with sequence similarity 150, m  | 7.32E-05 | 1 | 4.08 | 4.31 | 4.33 | 4.29 | 4.31 | 4.25 | 4.21 | 4.23 |
| TC0500308 | FAM151B                 | 167555 family with sequence similarity 151, m  | 2.73E-07 | 1 | 4.74 | 5.11 | 5.49 | 5.55 | 5.62 | 5.18 | 5.21 | 4.93 |
| TC1101150 | FAM160A2                | 84067 family with sequence similarity 160, m   | 1.15E-10 | 1 | 5.72 | 6.09 | 6.11 | 6.03 | 6.09 | 5.81 | 5.74 | 5.65 |
| TC1000604 | FAM160B1 ///            | 57700 family with sequence similarity 160, m   | 7.28E-06 | 1 | 6.84 | 7.30 | 7.40 | 7.39 | 7.20 | 7.21 | 7.14 | 7.15 |
| TC0501144 | FAM172A                 | 83989 family with sequence similarity 172, m   | 1.18E-15 | 1 | 5.18 | 6.05 | 6.24 | 6.08 | 5.79 | 5.72 | 5.72 | 5.47 |
| TC1600032 | FAM173A                 | 65990 family with sequence similarity 173, m   | 5.30E-05 | 1 | 5.37 | 5.60 | 5.70 | 5.64 | 5.62 | 5.61 | 5.60 | 5.60 |
| TC1700196 | FAM18B                  | 51030 family with sequence similarity 18, mer  | 0.00084  | 1 | 5.11 | 5.43 | 5.63 | 5.57 | 5.42 | 5.45 | 5.54 | 5.63 |
| TC0X00564 | FAM45B                  | 55855 family with sequence similarity 45, mer  | 7.79E-06 | 1 | 5.14 | 5.69 | 5.92 | 5.75 | 5.46 | 5.56 | 5.67 | 5.70 |
| TC0300462 | FAM55C                  | 91775 family with sequence similarity 55, mer  | 3.33E-08 | 1 | 4.81 | 5.54 | 5.64 | 5.45 | 5.47 | 5.36 | 5.22 | 5.17 |
| TC1700006 | FAM57A                  | 79850 family with sequence similarity 57, mer  | 1.24E-05 | 1 | 4.25 | 4.55 | 4.57 | 4.63 | 4.63 | 4.66 | 4.52 | 4.51 |
| TC1500370 | FAM63B                  | 54629 family with sequence similarity 63, mer  | 6.39E-08 | 1 | 4.67 | 5.42 | 5.83 | 5.72 | 5.46 | 5.34 | 5.36 | 5.14 |
| TC1300671 | FAM70B                  | 348013 family with sequence similarity 70, mer | 1.30E-05 | 1 | 4.91 | 5.17 | 5.17 | 5.04 | 5.09 | 5.05 | 5.02 | 4.97 |
| TC0801095 | FAM82B                  | 51115 family with sequence similarity 82, mer  | 2.17E-10 | 1 | 5.02 | 5.99 | 6.19 | 5.95 | 5.88 | 5.85 | 5.95 | 5.79 |
| TC1600829 | FAM86B2 /// F.653333 // | family with sequence similarity 86, mer        | 0.000303 | 1 | 4.72 | 5.09 | 5.04 | 5.04 | 5.02 | 5.04 | 4.97 | 5.02 |
| TC0103344 | FAM89A                  | 375061 family with sequence similarity 89, mer | 2.86E-08 | 1 | 2.63 | 3.00 | 3.70 | 3.47 | 3.29 | 2.90 | 2.79 | 2.80 |
| TC1100548 | FAM89B                  | 23625 family with sequence similarity 89, mer  | 3.35E-05 | 1 | 4.84 | 5.14 | 5.24 | 5.26 | 5.26 | 5.20 | 5.13 | 5.17 |

|           |                |                                                  |          |   |      |       |       |       |       |       |       |       |
|-----------|----------------|--------------------------------------------------|----------|---|------|-------|-------|-------|-------|-------|-------|-------|
| TC1100190 | FAR1 /// MLSTI | 84188 fatty acyl CoA reductase 1 /// Fatty acy   | 3.52E-12 | 1 | 7.23 | 7.76  | 7.95  | 7.83  | 7.71  | 7.62  | 7.53  | 7.41  |
| TC0500843 | FASTKD3        | 79072 FAST kinase domains 3 /// FAST kinase      | 3.10E-17 | 1 | 3.74 | 4.68  | 5.16  | 4.90  | 4.67  | 4.42  | 4.35  | 4.16  |
| TC0501259 | FBN2           | 2201 fibrillin 2 (congenital contractural aract  | 4.12E-07 | 1 | 3.48 | 4.09  | 3.88  | 3.94  | 3.99  | 3.79  | 3.73  | 3.55  |
| TC0501198 | FBXL17         | 64839 F-box and leucine-rich repeat protein 1    | 8.72E-05 | 1 | 4.26 | 4.60  | 4.61  | 4.57  | 4.50  | 4.48  | 4.49  | 4.45  |
| TC0400830 | FBXL5          | 26234 F-box and leucine-rich repeat protein 5    | 3.03E-08 | 1 | 8.15 | 8.68  | 8.67  | 8.60  | 8.47  | 8.54  | 8.38  | 8.42  |
| TC0101546 | FBXO28         | 23219 F-box protein 28                           | 1.91E-11 | 1 | 4.76 | 5.55  | 5.41  | 5.18  | 5.12  | 5.46  | 5.58  | 5.51  |
| TC0601667 | FBXO30         | 84085 F-box protein 30                           | 1.16E-21 | 1 | 6.10 | 7.11  | 7.50  | 7.22  | 6.90  | 6.86  | 6.75  | 6.73  |
| TC1400245 | FBXO34         | 55030 F-box protein 34                           | 1.45E-13 | 1 | 5.49 | 6.15  | 6.04  | 6.20  | 5.97  | 5.83  | 5.76  | 5.63  |
| TC0401414 | FBXO8          | 26269 F-box protein 8 /// F-box only protein 8   | 3.35E-05 | 1 | 4.78 | 5.34  | 5.40  | 5.20  | 5.16  | 5.21  | 5.22  | 5.26  |
| TC0600463 | FBXO9          | 26268 F-box protein 9                            | 5.14E-09 | 1 | 5.20 | 6.09  | 6.10  | 5.99  | 6.13  | 5.88  | 5.77  | 5.41  |
| TC0501487 | FBXW11         | 23291 F-box and WD repeat domain containir       | 5.96E-06 | 1 | 5.73 | 6.23  | 6.17  | 6.20  | 6.16  | 6.08  | 6.06  | 6.02  |
| TC0901295 | FBXW2          | 26190 F-box and WD repeat domain containir       | 2.93E-18 | 1 | 6.33 | 7.23  | 7.19  | 7.22  | 7.13  | 6.75  | 6.60  | 6.44  |
| TC0901455 | FBXW5          | 54461 F-box and WD repeat domain containir       | 1.16E-05 | 1 | 5.49 | 5.75  | 5.73  | 5.77  | 5.79  | 5.74  | 5.67  | 5.68  |
| TC1900873 | FCAR           | 2204 Fc fragment of IgA, receptor for            | 2.80E-26 | 1 | 6.88 | 9.01  | 8.63  | 8.30  | 8.33  | 8.02  | 7.72  | 7.57  |
| TC0101207 | FCER1G         | 2207 Fc fragment of IgE, high affinity I, recep  | 2.72E-28 | 1 | 9.64 | 11.31 | 11.48 | 11.33 | 11.15 | 11.07 | 10.95 | 10.74 |
| TC0100997 | FCGR1A         | 2209 Fc fragment of IgG, high affinity Ia, rece  | 2.89E-05 | 1 | 6.20 | 7.71  | 7.95  | 7.94  | 7.59  | 7.97  | 7.87  | 7.70  |
| TC0102609 | FCGR1B         | 2210 Fc fragment of IgG, high affinity Ib, rece  | 1.47E-05 | 1 | 7.24 | 8.54  | 8.81  | 8.75  | 8.38  | 8.73  | 8.65  | 8.54  |
| TC0901425 | FCN1           | 2219 ficolin (collagen/fibrinogen domain con     | 4.02E-08 | 1 | 8.94 | 10.46 | 10.10 | 10.38 | 10.46 | 10.28 | 9.79  | 9.77  |
| TC0900684 | FCN2           | 2220 ficolin (collagen/fibrinogen domain con     | 2.91E-06 | 1 | 5.80 | 6.16  | 6.05  | 6.07  | 6.12  | 6.11  | 5.92  | 5.92  |
| TC0102032 | FCN3           | 8547 ficolin (collagen/fibrinogen domain con     | 0.000842 | 1 | 4.52 | 4.68  | 4.63  | 4.54  | 4.62  | 4.57  | 4.54  | 4.54  |
| TC0102877 | FCRL1          | 115350 Fc receptor-like 1 /// Fc receptor-like 1 | 2.55E-23 | 1 | 4.56 | 6.01  | 6.19  | 5.60  | 5.27  | 4.88  | 4.74  | 4.58  |
| TC1500430 | FEM1B          | 10116 fem-1 homolog b (C. elegans)               | 7.03E-08 | 1 | 5.23 | 5.60  | 5.94  | 5.92  | 5.91  | 5.85  | 5.84  | 5.70  |
| TC0501222 | FEM1C          | 56929 fem-1 homolog c (C. elegans)               | 5.59E-28 | 1 | 5.57 | 6.90  | 7.02  | 6.77  | 6.56  | 6.50  | 6.35  | 6.27  |
| TC1100506 | FERMT3         | 83706 fermitin family homolog 3 (Drosophila)     | 7.98E-10 | 1 | 6.11 | 6.89  | 6.90  | 6.96  | 6.99  | 6.62  | 6.47  | 6.36  |
| TC1500631 | FES            | 2242 feline sarcoma oncogene                     | 0.000849 | 1 | 5.63 | 5.83  | 5.76  | 5.79  | 5.73  | 5.67  | 5.66  | 5.59  |
| TC0201426 | FEZ2           | 9637 fasciculation and elongation protein ze     | 0.000381 | 1 | 4.62 | 5.01  | 4.98  | 5.03  | 4.96  | 4.98  | 4.98  | 4.91  |
| TC1900440 | FFAR3          | 731823 // free fatty acid receptor 3             | 4.82E-06 | 1 | 4.21 | 4.92  | 4.73  | 4.81  | 4.66  | 4.43  | 4.59  | 4.40  |
| TC1200240 | FGD4           | 121512 FYVE, RhoGEF and PH domain containir      | 2.15E-25 | 1 | 6.07 | 7.83  | 7.58  | 7.20  | 7.03  | 6.94  | 6.90  | 6.84  |
| TC0X01298 | FGF13          | 2258 fibroblast growth factor 13 /// Fibrobla    | 9.51E-08 | 1 | 3.94 | 4.36  | 4.60  | 4.56  | 4.36  | 4.29  | 4.18  | 4.07  |
| TC1900013 | FGF22          | 27006 fibroblast growth factor 22 /// Fibrobla   | 0.000202 | 1 | 4.81 | 5.15  | 5.18  | 5.12  | 5.08  | 5.10  | 5.07  | 5.04  |
| TC1200209 | FGFR1OP2       | 26127 FGFR1 oncogene partner 2 /// FGFR1 o       | 6.44E-07 | 1 | 6.04 | 6.35  | 6.55  | 6.69  | 6.47  | 6.34  | 6.36  | 6.32  |
| TC0102036 | FGR            | 2268 Gardner-Rasheed feline sarcoma viral (      | 3.95E-07 | 1 | 8.10 | 8.49  | 8.61  | 8.50  | 8.38  | 8.24  | 8.10  | 8.01  |
| TC1101555 | FIBP           | 9158 fibroblast growth factor (acidic) intrace   | 3.81E-08 | 1 | 5.31 | 5.90  | 5.94  | 6.02  | 5.94  | 5.73  | 5.75  | 5.67  |
| TC0600483 | FKBP1C         | --- Peptidyl-prolyl cis-trans isomerase. [So     | 0.000249 | 1 | 4.57 | 4.90  | 5.04  | 4.95  | 4.95  | 4.90  | 4.77  | 4.81  |

|           |                |        |                                              |          |   |       |       |       |       |       |       |       |       |
|-----------|----------------|--------|----------------------------------------------|----------|---|-------|-------|-------|-------|-------|-------|-------|-------|
| TC0601203 | FKBP5          | 2289   | FK506 binding protein 5 /// FK506-bind       | 3.01E-23 | 1 | 5.64  | 7.30  | 7.53  | 7.27  | 7.04  | 6.47  | 6.58  | 6.33  |
| TC0700170 | FKBP9          | 11328  | FK506 binding protein 9, 63 kDa              | 1.45E-11 | 1 | 4.07  | 5.06  | 4.91  | 4.70  | 4.87  | 4.65  | 4.52  | 4.34  |
| TC0701217 | FKBP9L         | 360132 | FK506 binding protein 9-like                 | 3.20E-05 | 1 | 3.46  | 3.81  | 3.76  | 3.61  | 3.69  | 3.62  | 3.59  | 3.52  |
| TC0101227 | FLJ13137 /// N | 400793 | // hypothetical gene supported by AK125      | 0.000752 | 1 | 4.59  | 4.72  | 4.69  | 4.61  | 4.69  | 4.67  | 4.60  | 4.59  |
| TC0700065 | FLJ20323       | 54468  | hypothetical protein FLJ20323                | 1.61E-10 | 1 | 4.05  | 5.15  | 5.12  | 4.86  | 4.77  | 4.71  | 4.85  | 4.69  |
| TC1201011 | FLJ22662       | 79887  | hypothetical protein FLJ22662                | 1.42E-15 | 1 | 8.75  | 9.81  | 9.83  | 9.75  | 9.68  | 9.40  | 9.27  | 9.13  |
| TC0200094 | FLJ30851       | 653140 | hypothetical LOC653140                       | 1.76E-07 | 1 | 4.38  | 4.66  | 4.78  | 4.73  | 4.70  | 4.61  | 4.58  | 4.57  |
| TC1101670 | FLJ33790       | 283212 | hypothetical protein FLJ33790                | 0.000215 | 1 | 4.06  | 4.23  | 4.32  | 4.24  | 4.23  | 4.24  | 4.17  | 4.13  |
| TC0701541 | FLJ36031 /// N | 168455 | hypothetical protein FLJ36031                | 2.22E-09 | 1 | 5.24  | 5.97  | 5.83  | 5.98  | 6.02  | 5.87  | 5.73  | 5.79  |
| TC0200969 | FLJ38973       | 205327 | hypothetical protein FLJ38973                | 2.83E-19 | 1 | 4.07  | 5.40  | 5.52  | 5.31  | 5.28  | 5.08  | 5.15  | 4.97  |
| TC0701722 | FLJ43692 /// O | 730347 | // ARHGGEF5-like /// olfactory receptor, fa  | 5.43E-08 | 1 | 5.00  | 5.34  | 5.13  | 5.07  | 5.21  | 5.24  | 5.14  | 5.07  |
| TC0601105 | FLOT1          | 10211  | flotillin 1 /// Flotillin-1. [Source:Uniprot | 3.81E-15 | 1 | 6.39  | 7.10  | 7.11  | 6.92  | 6.92  | 6.82  | 6.76  | 6.66  |
| TC1701183 | FLOT2 /// DHR  | 147015 | // dehydrogenase/reductase (SDR family)      | 1.98E-09 | 1 | 7.59  | 8.53  | 8.68  | 8.59  | 8.45  | 8.29  | 8.08  | 7.97  |
| TC1400381 | FLVCR2         | 55640  | feline leukemia virus subgroup C cellula     | 0.000208 | 1 | 4.37  | 4.57  | 4.82  | 4.77  | 4.46  | 4.42  | 4.47  | 4.37  |
| TC1300138 | FNDC3A         | 22862  | fibronectin type III domain containing 3     | 1.38E-20 | 1 | 5.71  | 7.10  | 6.77  | 6.90  | 6.74  | 6.52  | 6.40  | 6.37  |
| TC0300791 | FNDC3B         | 64778  | fibronectin type III domain containing 3     | 3.61E-05 | 1 | 8.27  | 8.59  | 8.56  | 8.48  | 8.30  | 8.31  | 8.17  | 8.23  |
| TC1100648 | FOLR2          | 2350   | folate receptor 2 (fetal) /// Folate recep   | 6.11E-06 | 1 | 4.12  | 4.33  | 4.48  | 4.43  | 4.43  | 4.43  | 4.21  | 4.22  |
| TC0200139 | FOSL2          | 2355   | FOS-like antigen 2 /// Fos-related antig     | 5.92E-08 | 1 | 6.46  | 6.90  | 6.72  | 6.79  | 6.64  | 6.57  | 6.39  | 6.46  |
| TC0600013 | FOXC1          | 2296   | forkhead box C1                              | 9.30E-05 | 1 | 3.71  | 4.19  | 4.16  | 4.23  | 4.17  | 4.07  | 3.94  | 3.98  |
| TC0900423 | FOXE1 /// NDU  | 2304   | forkhead box E1 (thyroid transcription       | 1.18E-10 | 1 | 4.90  | 5.30  | 5.33  | 5.28  | 5.31  | 5.27  | 5.21  | 5.20  |
| TC0700030 | FOXX1          | 221937 | forkhead box K1                              | 8.48E-05 | 1 | 4.55  | 4.72  | 4.69  | 4.61  | 4.64  | 4.56  | 4.59  | 4.56  |
| TC0200233 | FOXN2          | 3344   | forkhead box N2 /// Forkhead box prot        | 7.21E-21 | 1 | 6.75  | 7.58  | 8.04  | 7.92  | 7.80  | 7.72  | 7.67  | 7.57  |
| TC1201546 | FOXN4          | 121643 | forkhead box N4 /// Forkhead box prot        | 0.000135 | 1 | 4.83  | 5.05  | 5.02  | 4.97  | 4.94  | 4.98  | 4.93  | 4.92  |
| TC1901751 | FPR1           | 2357   | formyl peptide receptor 1                    | 2.84E-05 | 1 | 10.36 | 10.82 | 10.62 | 10.73 | 10.52 | 10.52 | 10.39 | 10.38 |
| TC1900768 | FPR2           | 2358   | formyl peptide receptor 2                    | 2.67E-07 | 1 | 7.74  | 8.57  | 8.27  | 8.20  | 8.05  | 8.06  | 7.82  | 8.00  |
| TC0301336 | FRMD4B         | 23150  | FERM domain containing 4B                    | 1.95E-30 | 1 | 3.54  | 5.67  | 5.21  | 4.80  | 4.65  | 4.33  | 4.20  | 4.09  |
| TC0900183 | FRMPD1         | 22844  | FERM and PDZ domain containing 1             | 0.000244 | 1 | 3.11  | 3.22  | 3.23  | 3.23  | 3.24  | 3.16  | 3.15  | 3.13  |
| TC0900459 | FSD1L          | 83856  | fibronectin type III and SPRY domain cc      | 5.26E-06 | 1 | 2.27  | 2.74  | 2.96  | 2.75  | 2.74  | 2.58  | 2.55  | 2.49  |
| TC1900014 | FSTL3          | 10272  | follistatin-like 3 (secreted glycoprotein)   | 0.000381 | 1 | 4.86  | 5.04  | 5.01  | 5.11  | 5.08  | 5.08  | 5.02  | 4.97  |
| TC0501282 | FSTL4          | 23105  | follistatin-like 4 /// Follistatin-related p | 3.97E-07 | 1 | 3.94  | 3.97  | 4.07  | 4.17  | 4.24  | 4.06  | 3.89  | 3.94  |
| TC0901458 | FUT7           | 2529   | fucosyltransferase 7 (alpha (1,3) fucosy     | 2.97E-05 | 1 | 5.19  | 5.51  | 5.64  | 5.46  | 5.43  | 5.37  | 5.15  | 5.22  |
| TC0300829 | FXR1           | 8087   | fragile X mental retardation, autosoma       | 0.000444 | 1 | 7.18  | 7.66  | 7.67  | 7.65  | 7.63  | 7.67  | 7.73  | 7.57  |
| TC1900434 | FXYD5          | 53827  | FXYD domain containing ion transport i       | 1.24E-10 | 1 | 6.27  | 6.92  | 7.21  | 7.27  | 7.23  | 7.00  | 6.89  | 6.85  |
| TC0101483 | G0S2           | 50486  | G0/G1switch 2                                | 3.80E-06 | 1 | 5.57  | 6.44  | 6.03  | 5.81  | 5.90  | 6.06  | 5.72  | 5.94  |

|           |                                                                    |        |                                          |          |   |      |       |       |       |       |       |       |       |
|-----------|--------------------------------------------------------------------|--------|------------------------------------------|----------|---|------|-------|-------|-------|-------|-------|-------|-------|
| TC1600598 | GABARAPL2                                                          | 11345  | GABA(A) receptor-associated protein-li   | 2.07E-09 | 1 | 8.89 | 9.28  | 9.39  | 9.48  | 9.42  | 9.38  | 9.30  | 9.30  |
| TC0601083 | GABBR1 /// NM                                                      | 2550   | gamma-aminobutyric acid (GABA) B rec     | 5.47E-08 | 1 | 5.57 | 5.93  | 5.84  | 5.82  | 5.94  | 5.92  | 5.80  | 5.73  |
| TC0100637 | GADD45A                                                            | 1647   | growth arrest and DNA-damage-inducib     | 2.02E-38 | 1 | 5.10 | 7.54  | 7.94  | 7.33  | 7.20  | 6.63  | 6.55  | 6.22  |
| TC1100611 | GAL                                                                | 51083  | galanin prepropeptide                    | 6.44E-07 | 1 | 4.93 | 5.28  | 5.27  | 5.27  | 5.31  | 5.30  | 5.24  | 5.14  |
| TC1401045 | GALC                                                               | 2581   | galactosylceramidase                     | 0.00026  | 1 | 5.39 | 5.86  | 5.55  | 5.53  | 5.42  | 5.52  | 5.70  | 5.67  |
| TC1701697 | GALK1                                                              | 2584   | galactokinase 1 /// Galactokinase (EC 2  | 5.64E-06 | 1 | 5.31 | 5.43  | 5.56  | 5.64  | 5.58  | 5.52  | 5.49  | 5.45  |
| TC1800141 | GALNT1                                                             | 2589   | UDP-N-acetyl-alpha-D-galactosamine:p     | 8.70E-13 | 1 | 6.10 | 7.33  | 7.42  | 7.03  | 6.82  | 6.79  | 6.85  | 6.72  |
| TC0201409 | GALNT14                                                            | 79623  | UDP-N-acetyl-alpha-D-galactosamine:p     | 3.46E-14 | 1 | 4.61 | 5.15  | 5.54  | 5.82  | 5.77  | 5.52  | 5.36  | 5.06  |
| TC0101601 | GALNT2                                                             | 2590   | UDP-N-acetyl-alpha-D-galactosamine:p     | 6.08E-21 | 1 | 4.56 | 5.34  | 6.15  | 5.72  | 5.28  | 4.78  | 4.79  | 4.66  |
| TC0202064 | GALNT3                                                             | 2591   | UDP-N-acetyl-alpha-D-galactosamine:p     | 8.84E-11 | 1 | 5.51 | 6.13  | 6.84  | 6.65  | 6.35  | 6.60  | 6.52  | 6.48  |
| TC1500264 | GANC /// CAPN 2595 /// ε glucosidase, alpha; neutral C /// calpair | 2595   |                                          | 2.81E-06 | 1 | 4.64 | 5.11  | 5.02  | 4.93  | 5.01  | 4.91  | 4.88  | 4.60  |
| TC1200055 | GAPDH                                                              | 2597   | glyceraldehyde-3-phosphate dehydrog      | 2.33E-20 | 1 | 8.91 | 10.32 | 10.49 | 10.56 | 10.59 | 10.18 | 9.90  | 9.67  |
| TC1400791 | GARNL1                                                             | 253959 | GTPase activating Rap/RanGAP domain      | 0.000257 | 1 | 3.90 | 4.30  | 4.07  | 4.09  | 4.10  | 4.08  | 4.13  | 4.04  |
| TC1701025 | GAS7                                                               | 8522   | growth arrest-specific 7                 | 1.32E-16 | 1 | 5.52 | 6.65  | 7.01  | 6.85  | 6.60  | 6.28  | 6.24  | 6.04  |
| TC0102826 | GBA /// GBAP                                                       | 2629   | glucosidase, beta; acid (includes glucos | 9.97E-08 | 1 | 5.62 | 6.09  | 6.15  | 6.28  | 6.33  | 6.16  | 6.00  | 5.89  |
| TC0700268 | GBAS                                                               | 2631   | glioblastoma amplified sequence          | 5.25E-11 | 1 | 3.80 | 4.26  | 4.49  | 4.55  | 4.37  | 4.27  | 4.29  | 4.15  |
| TC0301369 | GBE1                                                               | 2632   | glucan (1,4-alpha-), branching enzyme    | 3.75E-13 | 1 | 5.57 | 6.82  | 6.64  | 6.58  | 6.74  | 6.55  | 6.30  | 6.11  |
| TCOX01155 | GBG5L_HUMAI ---                                                    |        | Guanine nucleotide-binding protein G(l   | 6.36E-20 | 1 | 6.98 | 7.81  | 8.15  | 8.10  | 8.04  | 7.92  | 7.76  | 7.73  |
| TC0901407 | GBGT1                                                              | 26301  | globoside alpha-1,3-N-acetylgalactosan   | 0.000414 | 1 | 4.93 | 5.09  | 5.20  | 5.08  | 5.04  | 5.02  | 4.93  | 4.97  |
| TC0200821 | GCA                                                                | 25801  | grancalcin, EF-hand calcium binding pr   | 1.02E-19 | 1 | 9.91 | 10.51 | 10.68 | 10.31 | 10.27 | 10.27 | 10.17 | 10.14 |
| TC1400872 | GCH1                                                               | 2643   | GTP cyclohydrolase 1 (dopa-responsive    | 3.28E-09 | 1 | 3.47 | 5.76  | 5.85  | 5.59  | 5.40  | 5.43  | 5.37  | 5.03  |
| TC0102452 | GCLM                                                               | 2730   | glutamate-cysteine ligase, modifier sub  | 4.78E-24 | 1 | 3.78 | 5.49  | 5.80  | 5.47  | 5.44  | 5.16  | 4.97  | 4.69  |
| TC0102591 | GDAP2                                                              | 54834  | ganglioside induced differentiation ass  | 0.000783 | 1 | 6.20 | 6.32  | 6.37  | 6.26  | 6.06  | 6.26  | 6.25  | 6.34  |
| TC1000951 | GDF10                                                              | 2662   | growth differentiation factor 10 /// Bor | 0.000537 | 1 | 4.15 | 4.33  | 4.40  | 4.33  | 4.29  | 4.29  | 4.22  | 4.27  |
| TC1000744 | GDI2                                                               | 2665   | GDP dissociation inhibitor 2 /// Rab GD  | 2.62E-06 | 1 | 7.55 | 7.81  | 8.04  | 7.94  | 7.88  | 7.89  | 7.86  | 7.85  |
| TC1601183 | GFOD2                                                              | 81577  | glucose-fructose oxidoreductase doma     | 2.44E-08 | 1 | 5.50 | 5.83  | 5.90  | 5.73  | 5.82  | 5.69  | 5.58  | 5.48  |
| TC2200141 | GGT1                                                               | 2678   | gamma-glutamyltransferase 1              | 8.14E-09 | 1 | 5.47 | 5.66  | 5.66  | 5.70  | 5.67  | 5.52  | 5.42  | 5.45  |
| TC2200426 | GGT2                                                               | 728441 | gamma-glutamyltransferase 2              | 2.80E-07 | 1 | 5.37 | 5.64  | 5.67  | 5.65  | 5.63  | 5.53  | 5.41  | 5.39  |
| TC2200471 | GGT2 ---                                                           |        | Gamma-glutamyltransferase-like prote     | 5.06E-07 | 1 | 4.96 | 5.09  | 5.09  | 5.07  | 5.11  | 4.97  | 4.89  | 4.88  |
| TC2000631 | GGTLC1                                                             | 92086  | gamma-glutamyltransferase light chain    | 3.56E-06 | 1 | 5.19 | 5.31  | 5.34  | 5.27  | 5.25  | 5.18  | 5.10  | 5.13  |
| TC2200106 | GGTLC2 /// GG                                                      | 91227  | gamma-glutamyltransferase light chain    | 7.63E-13 | 1 | 4.81 | 5.24  | 5.25  | 5.19  | 5.19  | 5.03  | 4.88  | 4.94  |
| TC2200449 | GGTLC3                                                             | 728226 | gamma-glutamyltransferase light chain    | 3.03E-06 | 1 | 6.25 | 6.58  | 6.61  | 6.59  | 6.54  | 6.50  | 6.37  | 6.36  |
| TC1000393 | GHITM                                                              | 27069  | growth hormone inducible transmemb       | 2.81E-05 | 1 | 6.92 | 7.28  | 7.37  | 7.30  | 7.21  | 7.22  | 7.22  | 7.23  |
| TC0700881 | GIMAP8                                                             | 155038 | GTPase, IMAP family member 8             | 1.46E-05 | 1 | 5.08 | 5.37  | 5.77  | 5.87  | 5.07  | 4.89  | 5.43  | 5.37  |

|           |                                                                |        |                                                      |          |   |      |      |      |      |      |      |      |      |
|-----------|----------------------------------------------------------------|--------|------------------------------------------------------|----------|---|------|------|------|------|------|------|------|------|
| TC1300319 | GJB6                                                           | 10804  | gap junction protein, beta 6, 30kDa                  | 2.93E-10 | 1 | 3.89 | 4.69 | 4.26 | 4.17 | 4.30 | 4.29 | 4.09 | 4.08 |
| TC1701432 | GJC1                                                           | 10052  | gap junction protein, gamma 1, 45kDa                 | 3.59E-05 | 1 | 3.24 | 3.46 | 3.58 | 3.50 | 3.43 | 3.37 | 3.34 | 3.36 |
| TC0301620 | GK5                                                            | 256356 | glycerol kinase 5 (putative) /// glycerol            | 3.90E-22 | 1 | 3.21 | 5.12 | 4.24 | 3.66 | 3.74 | 3.56 | 3.47 | 3.35 |
| TC0700066 | GLCCI1                                                         | 113263 | glucocorticoid induced transcript 1                  | 3.42E-05 | 1 | 6.31 | 6.84 | 6.71 | 6.61 | 6.60 | 6.62 | 6.56 | 6.57 |
| TC1500434 | GLCE                                                           | 26035  | glucuronic acid epimerase                            | 1.83E-05 | 1 | 3.59 | 3.76 | 3.89 | 3.88 | 3.81 | 3.74 | 3.70 | 3.69 |
| TC0501156 | GLRX                                                           | 2745   | glutaredoxin (thioltransferase)                      | 2.83E-07 | 1 | 6.90 | 7.36 | 7.69 | 7.60 | 7.50 | 7.53 | 7.53 | 7.60 |
| TC0103088 | GLRX2                                                          | 51022  | glutaredoxin 2                                       | 2.12E-12 | 1 | 5.23 | 5.94 | 6.04 | 6.07 | 6.15 | 6.05 | 6.02 | 5.96 |
| TC1900305 | GLT25D1                                                        | 79709  | glycosyltransferase 25 domain containi               | 1.68E-11 | 1 | 5.20 | 5.69 | 6.06 | 6.04 | 5.77 | 5.53 | 5.49 | 5.39 |
| TC1201555 | GLTPP1 /// GLT645312 // glycolipid transfer protein pseudogene |        |                                                      | 3.87E-15 | 1 | 5.02 | 6.19 | 6.16 | 6.19 | 6.09 | 5.82 | 5.80 | 5.72 |
| TC1001131 | GLUD1                                                          | 2746   | glutamate dehydrogenase 1                            | 4.38E-12 | 1 | 4.82 | 5.20 | 5.46 | 5.52 | 5.39 | 5.28 | 5.37 | 5.23 |
| TC0500618 | GM2A                                                           | 2760   | GM2 ganglioside activator                            | 5.87E-05 | 1 | 5.48 | 6.14 | 6.34 | 6.42 | 6.12 | 5.95 | 5.82 | 5.71 |
| TC0600897 | GMD5                                                           | 2762   | GDP-mannose 4,6-dehydratase /// GDF                  | 0.000174 | 1 | 4.25 | 4.47 | 4.27 | 4.41 | 4.46 | 4.33 | 4.31 | 4.27 |
| TC1400869 | GMFB                                                           | 2764   | glia maturation factor, beta /// Glia ma             | 8.54E-15 | 1 | 5.60 | 6.33 | 6.68 | 6.57 | 6.47 | 6.39 | 6.24 | 6.20 |
| TC0100804 | GNAI3                                                          | 2773   | guanine nucleotide binding protein (G <sub>i</sub> ) | 1.61E-08 | 1 | 9.01 | 9.38 | 9.46 | 9.34 | 9.17 | 9.24 | 9.13 | 9.19 |
| TC0901061 | GNAQ                                                           | 2776   | guanine nucleotide binding protein (G <sub>i</sub> ) | 1.43E-12 | 1 | 8.13 | 8.56 | 8.74 | 8.58 | 8.37 | 8.38 | 8.27 | 8.30 |
| TC1400227 | GNG2                                                           | 54331  | guanine nucleotide binding protein (G <sub>i</sub> ) | 1.36E-09 | 1 | 6.13 | 6.97 | 6.82 | 6.64 | 6.64 | 6.59 | 6.41 | 6.50 |
| TC1201358 | GNS                                                            | 2799   | glucosamine (N-acetyl)-6-sulfatase (Sar              | 5.87E-14 | 1 | 7.43 | 8.34 | 8.36 | 8.32 | 8.10 | 7.98 | 7.89 | 7.86 |
| TC0500897 | GOLPH3                                                         | 64083  | golgi phosphoprotein 3 (coat-protein)                | 7.01E-07 | 1 | 7.13 | 7.43 | 7.52 | 7.63 | 7.46 | 7.45 | 7.33 | 7.38 |
| TC1200189 | GOLT1B                                                         | 51026  | golgi transport 1 homolog B (S. cerevisi             | 0.000171 | 1 | 3.84 | 4.17 | 4.32 | 4.23 | 4.23 | 4.25 | 4.30 | 4.23 |
| TC1700541 | GOSR2                                                          | 9570   | golgi SNAP receptor complex member 2                 | 2.90E-06 | 1 | 4.48 | 4.90 | 5.20 | 5.26 | 5.04 | 4.88 | 4.90 | 4.71 |
| TC0800618 | GPAA1                                                          | 8733   | glycosylphosphatidylinositol anchor att              | 3.95E-07 | 1 | 4.83 | 4.97 | 4.99 | 4.92 | 4.97 | 4.86 | 4.83 | 4.82 |
| TC0103233 | GPATCH2                                                        | 55105  | G patch domain containing 2 /// G patc               | 5.49E-05 | 1 | 3.55 | 3.66 | 3.80 | 3.72 | 3.64 | 3.61 | 3.64 | 3.56 |
| TC1401164 | GPR132                                                         | 29933  | G protein-coupled receptor 132                       | 2.39E-08 | 1 | 4.90 | 5.57 | 5.28 | 5.23 | 5.18 | 5.06 | 5.12 | 5.06 |
| TC0700191 | GPR141                                                         | 353345 | G protein-coupled receptor 141                       | 7.43E-21 | 1 | 5.66 | 7.79 | 7.59 | 7.61 | 7.79 | 7.11 | 6.75 | 6.64 |
| TC0700010 | GPR146                                                         | 115330 | G protein-coupled receptor 146                       | 0.000785 | 1 | 4.78 | 5.07 | 5.10 | 5.03 | 4.99 | 5.08 | 4.96 | 5.03 |
| TC0300779 | GPR160                                                         | 26996  | G protein-coupled receptor 160                       | 2.27E-21 | 1 | 5.47 | 7.35 | 7.62 | 7.12 | 7.09 | 6.97 | 6.71 | 6.71 |
| TC0300367 | GPR27                                                          | 2850   | G protein-coupled receptor 27                        | 0.000449 | 1 | 4.81 | 5.41 | 5.42 | 5.36 | 5.33 | 5.42 | 5.29 | 5.18 |
| TC1900441 | GPR42P                                                         | 2866   | G protein-coupled receptor 42 pseudoG                | 6.78E-05 | 1 | 5.57 | 6.00 | 5.92 | 6.13 | 5.87 | 5.81 | 5.76 | 5.75 |
| TC1400419 | GPR65                                                          | 8477   | G protein-coupled receptor 65                        | 1.66E-14 | 1 | 7.32 | 8.78 | 8.41 | 7.88 | 7.73 | 8.22 | 8.34 | 8.51 |
| TC1201264 | GPR84                                                          | 53831  | G protein-coupled receptor 84                        | 7.24E-27 | 1 | 3.99 | 7.67 | 7.40 | 6.52 | 6.49 | 5.82 | 5.26 | 4.94 |
| TC1600479 | GPR97                                                          | 222487 | G protein-coupled receptor 97 /// Prob               | 1.28E-12 | 1 | 8.16 | 9.36 | 9.10 | 8.81 | 8.67 | 8.46 | 8.16 | 8.13 |
| TC1900426 | GRAMD1A                                                        | 57655  | GRAM domain containing 1A                            | 1.27E-08 | 1 | 5.77 | 6.24 | 6.24 | 6.09 | 6.09 | 5.89 | 5.81 | 5.76 |
| TC2200365 | GRAMD4                                                         | 23151  | GRAM domain containing 4                             | 0.00021  | 1 | 4.40 | 4.59 | 4.64 | 4.53 | 4.52 | 4.47 | 4.42 | 4.42 |
| TC0701202 | GRB10                                                          | 2887   | growth factor receptor-bound protein 10              | 2.19E-15 | 1 | 4.33 | 4.89 | 5.39 | 5.32 | 5.16 | 4.80 | 4.80 | 4.59 |

|            |                      |                                           |                                            |          |      |      |      |      |      |      |      |      |      |
|------------|----------------------|-------------------------------------------|--------------------------------------------|----------|------|------|------|------|------|------|------|------|------|
| TC1500187  | GREM1                | 26585                                     | gremlin 1, cysteine knot superfamily, h    | 0.000859 | 1    | 3.37 | 3.54 | 3.44 | 3.44 | 3.51 | 3.37 | 3.38 | 3.45 |
| TC0800614  | GRINA                | 2907                                      | glutamate receptor, ionotropic, N-metl     | 3.00E-16 | 1    | 6.23 | 7.80 | 7.98 | 7.88 | 7.74 | 7.20 | 7.08 | 6.93 |
| TC0500751  | GRK6                 | 2870                                      | G protein-coupled receptor kinase 6        | 3.85E-13 | 1    | 6.22 | 7.17 | 6.97 | 6.86 | 6.91 | 6.69 | 6.56 | 6.51 |
| TC1700507  | GRN                  | 2896                                      | granulin /// Granulins precursor (Proep    | 4.46E-05 | 1    | 6.99 | 7.75 | 7.77 | 7.95 | 8.04 | 7.82 | 7.59 | 7.49 |
| TC0400809  | GRPEL1               | 80273                                     | GrpE-like 1, mitochondrial (E. coli)       | 2.82E-15 | 1    | 5.45 | 6.62 | 6.69 | 6.41 | 6.36 | 6.20 | 6.24 | 5.92 |
| TC0800847  | GSR                  | 2936                                      | glutathione reductase                      | 1.36E-14 | 1    | 7.33 | 7.96 | 8.21 | 8.47 | 8.34 | 8.08 | 8.17 | 7.97 |
| TC0700810  | GSTK1                | 373156                                    | glutathione S-transferase kappa 1 /// G    | 0.000233 | 1    | 5.64 | 5.61 | 6.05 | 6.11 | 5.85 | 5.78 | 5.95 | 5.85 |
| TC1000562  | GSTO1                | 9446                                      | glutathione S-transferase omega 1 /// G    | 2.84E-13 | 1    | 4.92 | 5.39 | 5.65 | 5.85 | 5.74 | 5.66 | 5.56 | 5.46 |
| TC0201985  | GTDC1                | 79712                                     | glycosyltransferase-like domain contain    | 1.67E-14 | 1    | 5.33 | 6.06 | 6.20 | 5.79 | 5.66 | 5.46 | 5.32 | 5.32 |
| TC1501007  | GTF2A2               | 2958                                      | general transcription factor IIA, 2, 12kD  | 9.78E-15 | 1    | 6.06 | 7.20 | 7.39 | 7.23 | 7.16 | 7.17 | 7.19 | 7.00 |
| TC1300121  | GTF2F2               | 2963                                      | general transcription factor IIF, polypep  | 1.91E-07 | 1    | 6.24 | 7.03 | 7.32 | 7.02 | 6.79 | 6.82 | 6.92 | 6.74 |
| TC0600845  | GTF2H5               | 404672                                    | general transcription factor IIH, polype   | 6.80E-14 | 1    | 4.22 | 5.20 | 5.71 | 5.64 | 5.61 | 5.51 | 5.58 | 5.27 |
| TC0701333  | GTF2IRD2             | 651101                                    | // GTF2I repeat domain containing 2        | 0.000746 | 1    | 5.02 | 5.26 | 5.24 | 5.18 | 5.27 | 5.25 | 5.24 | 5.13 |
| TC0700397  | GTF2IRD2B            | 651101                                    | // GTF2I repeat domain containing 2B       | 5.26E-05 | 1    | 5.13 | 5.51 | 5.49 | 5.46 | 5.48 | 5.48 | 5.42 | 5.34 |
| TC0Xr00003 | GTPBP6               | 8225                                      | GTP binding protein 6 (putative)           | 0.000522 | 1    | 4.65 | 5.03 | 4.89 | 5.00 | 4.98 | 4.90 | 4.86 | 4.87 |
| TC0300698  | GYG1                 | 2992                                      | glycogenin 1 /// Glycogenin-1 (EC 2.4.1    | 0        | 1    | 5.87 | 8.96 | 9.10 | 8.71 | 8.60 | 8.18 | 7.84 | 7.47 |
| TC1901674  | GYS1                 | 2997                                      | glycogen synthase 1 (muscle) /// Glyco     | 7.02E-06 | 1    | 4.36 | 5.10 | 4.85 | 4.77 | 5.04 | 4.79 | 4.71 | 4.53 |
| TC0X00464  | H2BFM /// H2E        | 286436                                    | H2B histone family, member M /// Hist      | 0.000384 | 1    | 2.46 | 2.50 | 2.66 | 2.47 | 2.53 | 2.44 | 2.43 | 2.48 |
| TC0100095  | H6PD                 | 9563                                      | hexose-6-phosphate dehydrogenase (g        | 3.22E-09 | 1    | 4.89 | 5.69 | 5.44 | 5.46 | 5.52 | 5.42 | 5.23 | 5.19 |
| TC0201372  | HADHA                | 3030                                      | hydroxyacyl-Coenzyme A dehydrogena         | 1.87E-08 | 1    | 6.87 | 7.52 | 7.54 | 7.69 | 7.59 | 7.49 | 7.48 | 7.27 |
| TC0200108  | HADHB                | 3032                                      | hydroxyacyl-Coenzyme A dehydrogena         | 2.00E-11 | 1    | 6.22 | 6.62 | 6.77 | 6.59 | 6.43 | 6.38 | 6.44 | 6.31 |
| TC1600033  | HAGHL                | 84264                                     | hydroxyacylglutathione hydrolase-like      | 0.000761 | 1    | 5.07 | 5.25 | 5.27 | 5.23 | 5.26 | 5.25 | 5.13 | 5.18 |
| TC0200860  | HAT1                 | 8520                                      | histone acetyltransferase 1                | 1.73E-10 | 1    | 5.93 | 6.90 | 7.03 | 6.78 | 6.61 | 6.59 | 6.60 | 6.54 |
| TC0501447  | HAVCR2               | 84868                                     | hepatitis A virus cellular receptor 2      | 7.67E-07 | 1    | 4.02 | 4.18 | 4.36 | 4.40 | 4.24 | 4.05 | 4.15 | 4.10 |
| TC0601624  | HBS1L                | 10767                                     | HBS1-like (S. cerevisiae) /// HBS1-like p  | 1.55E-12 | 1    | 4.86 | 5.51 | 5.66 | 5.61 | 5.54 | 5.37 | 5.38 | 5.22 |
| TC0102530  | HBXIP                | 10542                                     | hepatitis B virus x interacting protein // | 8.59E-21 | 1    | 6.44 | 7.45 | 7.56 | 7.31 | 7.18 | 7.07 | 6.93 | 6.88 |
| TC0X00037  | HCCS                 | 3052                                      | holocytochrome c synthase (cytochrom       | 3.34E-13 | 1    | 4.94 | 5.69 | 5.75 | 5.69 | 5.65 | 5.71 | 5.70 | 5.66 |
| TC0X00322  | hCG_1642624 , 645545 | // similar to immunoglobulin binding prot | 7.33E-10                                   | 1        | 5.71 | 6.11 | 6.19 | 6.26 | 6.15 | 6.11 | 6.21 | 6.21 | 6.21 |
| TC0501078  | hCG_1757335          | 643752 hCG1757335                         | 3.23E-06                                   | 1        | 4.95 | 5.49 | 5.56 | 5.48 | 5.56 | 5.50 | 5.45 | 5.41 | 5.41 |
| TC1500965  | hCG_18385 /// 646227 | // similar to cAMP-regulated phosphopro   | 0.000829                                   | 1        | 6.29 | 6.54 | 6.61 | 6.46 | 6.36 | 6.50 | 6.44 | 6.59 | 6.59 |
| TC0100258  | hCG_2003956 , 388499 | // hCG2003956 /// lysophospholipase II // | 2.59E-05                                   | 1        | 5.99 | 6.33 | 6.35 | 6.32 | 6.32 | 6.33 | 6.24 | 6.24 | 6.24 |
| TC1000484  | hCG_2015138 , 642969 | // phosphoglycerate mutase 1 pseudogen    | 4.04E-05                                   | 1        | 6.92 | 7.35 | 7.35 | 7.59 | 7.46 | 7.27 | 7.12 | 7.21 | 7.21 |
| TC1800346  | hCG_2025063 , 646981 | // protein tyrosine phosphatase, non-rec  | 1.00E-10                                   | 1        | 4.52 | 5.56 | 5.51 | 5.32 | 5.10 | 5.00 | 5.19 | 4.99 | 4.99 |
| TC1900462  | HCST                 | 10870                                     | hematopoietic cell signal transducer       | 1.33E-19 | 1    | 5.45 | 6.98 | 6.68 | 6.69 | 6.84 | 6.73 | 6.63 | 6.31 |



|           |               |                                               |          |   |      |       |      |      |      |      |      |      |
|-----------|---------------|-----------------------------------------------|----------|---|------|-------|------|------|------|------|------|------|
| TC0601544 | HDAC2         | 3066 histone deacetylase 2 /// Histone deac   | 1.02E-16 | 1 | 6.04 | 7.09  | 6.86 | 6.82 | 6.86 | 6.93 | 6.91 | 6.75 |
| TC0202430 | HDAC4         | 9759 histone deacetylase 4                    | 1.71E-08 | 1 | 5.67 | 6.12  | 6.04 | 6.15 | 6.05 | 5.97 | 5.91 | 5.87 |
| TC0601579 | HDDC2         | 51020 HD domain containing 2 /// HD domain    | 1.03E-06 | 1 | 5.51 | 5.86  | 6.05 | 5.68 | 5.77 | 5.76 | 5.83 | 5.69 |
| TC1900093 | HDGF2         | 84717 hepatoma-derived growth factor-relate   | 6.83E-05 | 1 | 5.17 | 5.51  | 5.43 | 5.48 | 5.48 | 5.44 | 5.41 | 5.40 |
| TC0X00757 | HDHD1A        | 8226 haloacid dehalogenase-like hydrolase d   | 6.52E-06 | 1 | 4.92 | 5.09  | 5.24 | 5.31 | 5.26 | 5.09 | 5.18 | 5.08 |
| TC1800451 | HDHD2         | 84064 haloacid dehalogenase-like hydrolase d  | 8.09E-12 | 1 | 4.55 | 5.73  | 5.97 | 5.75 | 5.80 | 5.50 | 5.43 | 5.15 |
| TC1600418 | HEATR3        | 55027 HEAT repeat containing 3 /// HEAT rep   | 0.000367 | 1 | 4.10 | 4.09  | 4.31 | 4.33 | 4.22 | 4.17 | 4.29 | 4.13 |
| TC0600757 | HEBP2         | 23593 heme binding protein 2 /// Heme-bind    | 7.50E-16 | 1 | 7.21 | 8.13  | 8.31 | 8.07 | 8.00 | 8.02 | 8.01 | 7.98 |
| TC1200494 | HELB          | 92797 helicase (DNA) B                        | 6.26E-06 | 1 | 5.05 | 6.32  | 5.76 | 5.93 | 5.64 | 5.52 | 5.69 | 5.52 |
| TC0102149 | HEYL          | 26508 hairy/enhancer-of-split related with YR | 0.000987 | 1 | 3.53 | 3.68  | 3.62 | 3.52 | 3.67 | 3.61 | 3.47 | 3.58 |
| TC0701381 | HGF           | 3082 hepatocyte growth factor (hepapoietin)   | 1.10E-25 | 1 | 3.15 | 5.42  | 5.41 | 4.90 | 4.47 | 3.85 | 3.59 | 3.47 |
| TC1000448 | HHEX          | 3087 hematopoietically expressed homeobo      | 7.62E-13 | 1 | 7.60 | 8.10  | 8.64 | 8.56 | 8.30 | 8.14 | 7.94 | 8.00 |
| TC0100765 | HIAT1         | 64645 hippocampus abundant transcript 1       | 1.54E-05 | 1 | 6.55 | 7.22  | 7.06 | 7.04 | 6.97 | 7.10 | 7.04 | 7.08 |
| TC0900402 | HIATL1        | 84641 hippocampus abundant transcript-like    | 1.26E-16 | 1 | 6.17 | 7.51  | 7.49 | 7.34 | 7.41 | 7.24 | 7.13 | 7.02 |
| TC0901168 | HIATL2        | --- Hippocampus abundant transcript-like      | 8.47E-05 | 1 | 5.36 | 5.65  | 5.66 | 5.60 | 5.66 | 5.60 | 5.54 | 5.46 |
| TC0202177 | HIBCH         | 26275 3-hydroxyisobutyryl-Coenzyme A hydr     | 1.54E-05 | 1 | 4.22 | 4.50  | 4.78 | 4.63 | 4.47 | 4.41 | 4.49 | 4.39 |
| TC1400283 | HIF1A         | 3091 hypoxia-inducible factor 1, alpha subur  | 8.40E-16 | 1 | 9.22 | 10.01 | 9.57 | 9.49 | 9.30 | 9.32 | 9.27 | 9.40 |
| TC1000512 | HIF1AN        | 55662 hypoxia-inducible factor 1, alpha subur | 0.000391 | 1 | 5.19 | 5.72  | 5.59 | 5.59 | 5.44 | 5.29 | 5.39 | 5.26 |
| TC0301134 | HIGD1A        | 25994 HIG1 domain family, member 1A           | 1.68E-12 | 1 | 7.44 | 7.96  | 8.40 | 8.16 | 7.96 | 8.05 | 7.94 | 7.94 |
| TC0701351 | HIP1          | 3092 huntingtin interacting protein 1         | 5.66E-08 | 1 | 6.23 | 6.95  | 6.90 | 6.74 | 6.46 | 6.28 | 6.25 | 6.22 |
| TC0100859 | HIPK1         | 204851 homeodomain interacting protein kina:  | 2.35E-05 | 1 | 7.87 | 7.99  | 8.02 | 8.06 | 7.91 | 7.80 | 7.77 | 7.76 |
| TC1100263 | HIPK3         | 10114 homeodomain interacting protein kina:   | 5.11E-05 | 1 | 9.10 | 9.30  | 9.36 | 9.32 | 9.14 | 9.14 | 9.03 | 9.02 |
| TC1000304 | HK1           | 3098 hexokinase 1                             | 3.98E-12 | 1 | 5.24 | 5.98  | 5.79 | 5.83 | 5.76 | 5.64 | 5.58 | 5.58 |
| TC0200364 | HK2           | 3099 hexokinase 2                             | 0.000965 | 1 | 6.28 | 6.95  | 6.82 | 6.86 | 6.77 | 6.69 | 6.64 | 6.59 |
| TC0501523 | HK3           | 3101 hexokinase 3 (white cell)                | 2.82E-25 | 1 | 5.27 | 6.56  | 6.69 | 6.45 | 6.35 | 5.92 | 5.74 | 5.50 |
| TC0401406 | HMGB2         | 3148 high-mobility group box 2                | 4.29E-27 | 1 | 6.11 | 7.37  | 7.34 | 7.25 | 7.33 | 7.19 | 6.99 | 6.92 |
| TC1701687 | HN1           | 51155 hematological and neurological expres:  | 1.86E-09 | 1 | 7.78 | 8.30  | 8.48 | 8.39 | 8.18 | 8.24 | 8.17 | 8.11 |
| TC0701077 | HNRNPA2B1     | 3181 heterogeneous nuclear ribonucleoprot     | 0.000755 | 1 | 8.82 | 9.10  | 9.10 | 8.88 | 8.91 | 8.92 | 8.97 | 8.87 |
| TC0200893 | HNRNPA3 /// F | 220988 heterogeneous nuclear ribonucleoprot   | 4.12E-09 | 1 | 8.16 | 8.93  | 8.81 | 8.54 | 8.56 | 8.59 | 8.67 | 8.52 |
| TC1000911 | HNRNPF        | 3185 heterogeneous nuclear ribonucleoprot     | 2.16E-10 | 1 | 5.25 | 5.79  | 5.65 | 5.58 | 5.64 | 5.68 | 5.62 | 5.58 |
| TC1900151 | HNRNPM        | 4670 heterogeneous nuclear ribonucleoprot     | 4.67E-06 | 1 | 7.67 | 8.60  | 8.46 | 8.25 | 8.39 | 8.29 | 8.30 | 8.09 |
| TC1901311 | HOMER3        | 9454 homer homolog 3 (Drosophila) /// Hor     | 9.79E-09 | 1 | 5.30 | 5.62  | 5.63 | 5.65 | 5.70 | 5.57 | 5.52 | 5.47 |
| TC0800261 | HOOK3         | 84376 hook homolog 3 (Drosophila)             | 9.88E-05 | 1 | 6.80 | 7.29  | 7.23 | 7.18 | 7.05 | 7.07 | 7.18 | 7.02 |
| TC0200887 | HOXD1         | 3231 homeobox D1 /// Homeobox protein H       | 0.000269 | 1 | 4.29 | 4.52  | 4.54 | 4.51 | 4.59 | 4.56 | 4.44 | 4.47 |

|           |                          |        |                                          |          |   |      |      |      |      |      |      |      |      |
|-----------|--------------------------|--------|------------------------------------------|----------|---|------|------|------|------|------|------|------|------|
| TC1600582 | HP                       | 3240   | haptoglobin /// Haptoglobin precursor    | 3.40E-28 | 1 | 4.31 | 8.46 | 8.43 | 8.18 | 8.48 | 8.06 | 7.34 | 6.48 |
| TC0401415 | HPGD                     | 3248   | hydroxyprostaglandin dehydrogenase       | 3.06E-23 | 1 | 3.96 | 5.59 | 6.81 | 6.04 | 5.28 | 4.56 | 4.39 | 4.31 |
| TC1600583 | HPR                      | 3250   | haptoglobin-related protein /// Haptog   | 6.97E-27 | 1 | 4.52 | 5.86 | 5.88 | 5.77 | 5.82 | 5.72 | 5.56 | 5.28 |
| TC0X00575 | HPRT1                    | 3251   | hypoxanthine phosphoribosyltransfera     | 4.12E-11 | 1 | 4.42 | 5.28 | 5.79 | 5.38 | 5.40 | 5.32 | 5.22 | 5.10 |
| TC1101243 | HPS5                     | 11234  | Hermansky-Pudlak syndrome 5              | 3.56E-07 | 1 | 3.83 | 4.50 | 4.16 | 4.01 | 4.04 | 4.06 | 4.03 | 4.03 |
| TC0201148 | HRB                      | 3267   | HIV-1 Rev binding protein /// Nucleopc   | 1.39E-38 | 1 | 6.75 | 9.12 | 9.32 | 8.62 | 8.43 | 7.88 | 7.64 | 7.41 |
| TC0500726 | HRH2                     | 3274   | histamine receptor H2                    | 2.39E-06 | 1 | 5.87 | 6.55 | 6.32 | 6.26 | 6.15 | 6.06 | 6.06 | 5.87 |
| TC2000880 | HRH3                     | 11255  | histamine receptor H3 /// Histamine H:   | 0.000923 | 1 | 4.81 | 5.01 | 5.01 | 4.95 | 4.95 | 4.95 | 4.93 | 4.89 |
| TC1700144 | HS3ST3B1                 | 9953   | heparan sulfate (glucosamine) 3-O-sulfi  | 1.63E-25 | 1 | 4.72 | 6.19 | 6.72 | 5.84 | 5.79 | 5.45 | 5.33 | 5.08 |
| TC1600628 | HSBP1                    | 3281   | heat shock factor binding protein 1      | 1.08E-05 | 1 | 8.93 | 9.16 | 9.52 | 9.45 | 9.28 | 9.35 | 9.31 | 9.40 |
| TC2200168 | HSCB                     | 150274 | HscB iron-sulfur cluster co-chaperone f  | 1.05E-17 | 1 | 3.29 | 4.56 | 5.08 | 4.15 | 4.02 | 3.75 | 3.77 | 3.61 |
| TC1100292 | HSD17B12                 | 51144  | hydroxysteroid (17-beta) dehydrogena:    | 4.37E-10 | 1 | 6.08 | 7.44 | 7.07 | 7.06 | 7.36 | 7.24 | 6.98 | 6.83 |
| TC0900489 | HSDL2                    | 84263  | hydroxysteroid dehydrogenase like 2 //   | 1.05E-05 | 1 | 7.60 | 7.92 | 8.13 | 7.86 | 7.61 | 7.76 | 7.66 | 7.76 |
| TC1401135 | HSP90AA1                 | 3320   | heat shock protein 90kDa alpha (cytos    | 8.64E-06 | 1 | 8.65 | 9.23 | 9.10 | 9.00 | 9.09 | 9.10 | 9.16 | 9.04 |
| TC0600280 | HSPA1B                   | 3304   | heat shock 70kDa protein 1B              | 5.72E-16 | 1 | 5.82 | 6.82 | 7.00 | 6.91 | 6.79 | 6.58 | 6.56 | 6.54 |
| TC0600279 | HSPA1B /// HSI3304 /// ε | 3304   | heat shock 70kDa protein 1B /// heat s   | 4.53E-14 | 1 | 7.85 | 8.56 | 8.75 | 8.52 | 8.54 | 8.35 | 8.24 | 8.30 |
| TC0601137 | HSPA1L                   | 3305   | heat shock 70kDa protein 1-like /// Heε  | 6.72E-05 | 1 | 5.57 | 6.10 | 6.14 | 6.10 | 6.13 | 5.98 | 6.04 | 5.90 |
| TC1100226 | HTATIP2                  | 10553  | HIV-1 Tat interactive protein 2, 30kDa   | 6.79E-11 | 1 | 6.59 | 7.07 | 7.38 | 7.38 | 7.24 | 7.25 | 7.24 | 7.19 |
| TC0400075 | HTRA3                    | 94031  | HtrA serine peptidase 3 /// Probable se  | 0.000114 | 1 | 4.22 | 4.42 | 4.31 | 4.33 | 4.50 | 4.48 | 4.30 | 4.26 |
| TC0400036 | HTT                      | 3064   | huntingtin                               | 6.54E-08 | 1 | 4.39 | 5.07 | 4.94 | 4.75 | 4.77 | 4.58 | 4.63 | 4.50 |
| TC0701196 | HUS1                     | 3364   | HUS1 checkpoint homolog (S. pombe)       | 1.30E-06 | 1 | 4.52 | 5.02 | 5.10 | 4.97 | 4.93 | 4.75 | 4.82 | 4.73 |
| TC1500285 | HYPK /// SERF225764 ///  | 3364   | Huntingtin interacting protein K /// sm: | 2.48E-06 | 1 | 5.72 | 5.99 | 6.09 | 6.14 | 6.22 | 6.09 | 5.99 | 5.93 |
| TC0200027 | IAH1                     | 285148 | isoamyl acetate-hydrolyzing esterase 1   | 6.74E-08 | 1 | 6.00 | 6.09 | 6.39 | 6.30 | 6.29 | 6.21 | 6.19 | 6.06 |
| TC0101525 | IARS2                    | 55699  | isoleucyl-tRNA synthetase 2, mitochon    | 1.10E-14 | 1 | 3.83 | 4.73 | 5.08 | 4.95 | 4.83 | 4.66 | 4.66 | 4.41 |
| TC0101982 | ID3                      | 3399   | inhibitor of DNA binding 3, dominant n   | 1.73E-09 | 1 | 2.85 | 3.36 | 3.14 | 2.96 | 3.02 | 3.10 | 2.99 | 3.03 |
| TC1000724 | IDI1                     | 3422   | isopentenyl-diphosphate delta isomera    | 8.47E-24 | 1 | 4.79 | 6.28 | 6.31 | 5.67 | 5.43 | 5.34 | 5.31 | 5.26 |
| TC0601107 | IER3 /// NP_00           | 8870   | immediate early response 3 /// immedi    | 6.94E-08 | 1 | 5.83 | 6.31 | 6.19 | 6.11 | 6.20 | 6.11 | 5.79 | 5.92 |
| TC2100086 | IFNAR1                   | 3454   | interferon (alpha, beta and omega) rec   | 8.73E-05 | 1 | 8.11 | 8.70 | 8.69 | 8.54 | 8.34 | 8.45 | 8.41 | 8.40 |
| TC0601636 | IFNGR1                   | 3459   | interferon gamma receptor 1 /// Interf   | 1.72E-11 | 1 | 6.83 | 7.22 | 7.31 | 7.05 | 6.94 | 6.97 | 6.84 | 6.92 |
| TC1701160 | IFT20                    | 90410  | intraflagellar transport 20 homolog (Ch  | 1.05E-15 | 1 | 5.58 | 6.43 | 6.39 | 6.13 | 6.16 | 6.05 | 5.97 | 5.91 |
| TC2000287 | IFT52                    | 51098  | intraflagellar transport 52 homolog (Ch  | 0.000365 | 1 | 4.74 | 4.99 | 5.04 | 4.92 | 4.96 | 4.85 | 5.00 | 4.93 |
| TC0301427 | IFT57                    | 55081  | intraflagellar transport 57 homolog (Ch  | 8.71E-05 | 1 | 4.91 | 5.85 | 5.72 | 5.68 | 5.80 | 5.77 | 5.78 | 5.52 |
| TC0701189 | IGFBP3                   | 3486   | insulin-like growth factor binding prote | 0.000629 | 1 | 4.62 | 4.74 | 4.80 | 4.66 | 4.74 | 4.76 | 4.69 | 4.70 |
| TC0103182 | IL10                     | 3586   | interleukin 10                           | 1.57E-12 | 1 | 2.79 | 3.08 | 3.74 | 3.24 | 3.09 | 2.84 | 2.71 | 2.77 |

|           |          |                                                      |          |   |      |      |      |      |      |      |      |      |
|-----------|----------|------------------------------------------------------|----------|---|------|------|------|------|------|------|------|------|
| TC1100885 | IL10RA   | 3587 interleukin 10 receptor, alpha                  | 5.98E-11 | 1 | 4.88 | 6.02 | 5.41 | 5.37 | 5.15 | 5.10 | 5.05 | 5.12 |
| TC2100085 | IL10RB   | 3588 interleukin 10 receptor, beta                   | 4.04E-06 | 1 | 7.47 | 8.03 | 8.05 | 8.00 | 7.86 | 7.88 | 7.72 | 7.74 |
| TC2200011 | IL17RA   | 23765 interleukin 17 receptor A                      | 5.59E-05 | 1 | 8.80 | 9.19 | 9.09 | 9.20 | 9.11 | 8.99 | 8.95 | 8.91 |
| TC0200538 | IL18R1   | 8809 interleukin 18 receptor 1 /// Interleukin       | 2.45E-23 | 1 | 5.06 | 8.23 | 8.02 | 7.55 | 7.16 | 6.66 | 6.46 | 6.11 |
| TC0200539 | IL18RAP  | 8807 interleukin 18 receptor accessory prote         | 1.77E-14 | 1 | 6.38 | 8.50 | 8.47 | 7.90 | 7.63 | 7.63 | 7.33 | 7.01 |
| TC0200533 | IL1R2    | 7850 interleukin 1 receptor, type II                 | 1.40E-12 | 1 | 8.76 | 9.53 | 9.46 | 9.41 | 9.21 | 8.59 | 8.55 | 8.49 |
| TC0200595 | IL1RN    | 3557 interleukin 1 receptor antagonist               | 9.51E-08 | 1 | 5.24 | 6.17 | 6.02 | 6.13 | 5.96 | 5.95 | 5.84 | 5.90 |
| TC1600284 | IL4R     | 3566 interleukin 4 receptor /// Interleukin-4        | 1.72E-19 | 1 | 6.77 | 8.38 | 8.18 | 7.91 | 7.83 | 7.54 | 7.38 | 7.07 |
| TC0500989 | IL6ST    | 649891 // interleukin 6 signal transducer (gp130,    | 1.61E-23 | 1 | 4.73 | 6.87 | 6.96 | 6.84 | 6.42 | 6.10 | 5.88 | 5.68 |
| TC0102793 | ILF2     | 3608 interleukin enhancer binding factor 2, $\alpha$ | 5.73E-05 | 1 | 4.40 | 5.08 | 5.04 | 5.06 | 5.20 | 5.12 | 5.14 | 4.92 |
| TC1800058 | IMPA2    | 3613 inositol(myo)-1(or 4)-monophosphatas            | 4.66E-05 | 1 | 7.16 | 7.06 | 7.46 | 7.44 | 7.21 | 7.19 | 7.10 | 7.15 |
| TC0200624 | INSIG2   | 51141 insulin induced gene 2 /// Insulin-induc       | 1.06E-11 | 1 | 5.98 | 6.78 | 7.05 | 6.83 | 6.75 | 6.57 | 6.70 | 6.51 |
| TC0401168 | INTS12   | 57117 integrator complex subunit 12                  | 2.37E-06 | 1 | 5.28 | 5.93 | 5.90 | 5.79 | 5.61 | 5.72 | 5.87 | 5.74 |
| TC1300499 | INTS6    | 26512 integrator complex subunit 6                   | 1.44E-12 | 1 | 6.17 | 6.84 | 6.81 | 6.56 | 6.47 | 6.46 | 6.35 | 6.39 |
| TC1000995 | IPMK     | 253430 inositol polyphosphate multikinase            | 8.13E-05 | 1 | 7.45 | 8.10 | 8.19 | 8.17 | 7.94 | 8.21 | 8.01 | 8.10 |
| TC1201075 | IPO8     | 10526 importin 8                                     | 2.08E-05 | 1 | 5.32 | 5.79 | 6.07 | 5.86 | 5.68 | 5.71 | 5.80 | 5.68 |
| TC0101264 | IQWD1    | 648494 // IQ motif and WD repeats 1 /// IQ motif     | 2.17E-06 | 1 | 5.42 | 5.92 | 5.88 | 5.83 | 5.82 | 5.74 | 5.78 | 5.72 |
| TC0300047 | IRAK2    | 3656 interleukin-1 receptor-associated kinas         | 3.14E-08 | 1 | 4.25 | 4.75 | 4.58 | 4.73 | 4.83 | 4.58 | 4.52 | 4.44 |
| TC1200492 | IRAK3    | 11213 interleukin-1 receptor-associated kinas        | 2.47E-37 | 1 | 6.58 | 8.88 | 9.03 | 8.87 | 8.68 | 8.09 | 7.93 | 7.66 |
| TC1200266 | IRAK4    | 51135 interleukin-1 receptor-associated kinas        | 3.17E-06 | 1 | 6.32 | 6.43 | 6.68 | 6.57 | 6.26 | 6.23 | 6.39 | 6.18 |
| TC1600359 | ITGAM    | 3684 integrin, alpha M (complement compo             | 1.28E-22 | 1 | 7.71 | 8.93 | 8.97 | 8.96 | 8.92 | 8.50 | 8.28 | 8.11 |
| TC0201298 | ITGB1BP1 | 9270 integrin beta 1 binding protein 1 /// Int       | 1.48E-06 | 1 | 4.37 | 4.69 | 4.88 | 4.83 | 4.84 | 4.74 | 4.76 | 4.70 |
| TC0103072 | IVNS1ABP | 10625 influenza virus NS1A binding protein //        | 2.50E-17 | 1 | 7.80 | 9.05 | 8.37 | 8.17 | 8.38 | 8.38 | 8.11 | 8.13 |
| TC0900025 | JAK2     | 3717 Janus kinase 2 (a protein tyrosine kinas        | 1.98E-18 | 1 | 6.60 | 7.84 | 7.96 | 7.80 | 7.57 | 7.58 | 7.52 | 7.41 |
| TC1701722 | JMJD6    | 23210 jumonji domain containing 6 /// JmjC d         | 2.92E-13 | 1 | 6.26 | 7.50 | 7.18 | 6.92 | 6.94 | 6.85 | 6.73 | 6.61 |
| TC2200668 | JOSD1    | 9929 Josephin domain containing 1                    | 2.14E-19 | 1 | 4.98 | 6.81 | 6.32 | 6.14 | 6.03 | 5.84 | 5.69 | 5.53 |
| TC1100775 | JRKL     | 8690 jerky homolog-like (mouse)                      | 5.03E-07 | 1 | 3.70 | 4.64 | 4.84 | 4.72 | 4.73 | 4.64 | 4.55 | 4.33 |
| TC0X00760 | KAL1     | 3730 Kallmann syndrome 1 sequence                    | 1.57E-05 | 1 | 3.03 | 3.03 | 3.17 | 3.25 | 3.12 | 3.06 | 3.08 | 3.05 |
| TC0601674 | KATNA1   | 11104 katanin p60 (ATPase-containing) subun          | 4.14E-10 | 1 | 4.40 | 4.98 | 5.18 | 5.15 | 5.06 | 4.99 | 5.04 | 4.90 |
| TC0701115 | KBTBD2   | 25948 kelch repeat and BTB (POZ) domain cor          | 0.000661 | 1 | 7.55 | 7.81 | 7.71 | 7.61 | 7.50 | 7.68 | 7.65 | 7.71 |
| TC1300427 | KBTBD6   | 89890 kelch repeat and BTB (POZ) domain cor          | 2.91E-08 | 1 | 3.87 | 5.06 | 4.57 | 4.42 | 4.76 | 4.57 | 4.29 | 4.17 |
| TC1300429 | KBTBD7   | 84078 kelch repeat and BTB (POZ) domain cor          | 2.16E-07 | 1 | 6.23 | 7.17 | 7.36 | 7.27 | 7.20 | 7.04 | 6.94 | 6.88 |
| TC0200401 | KCMF1    | 56888 potassium channel modulatory factor 1          | 0.000102 | 1 | 7.82 | 8.12 | 8.22 | 8.19 | 8.05 | 8.07 | 8.00 | 7.99 |
| TC0100819 | KCNC4    | 3749 potassium voltage-gated channel, Shaw           | 6.29E-06 | 1 | 4.05 | 4.27 | 4.18 | 4.08 | 4.11 | 4.09 | 4.03 | 4.00 |

|            |                |           |                                          |          |   |      |      |      |      |      |      |      |      |
|------------|----------------|-----------|------------------------------------------|----------|---|------|------|------|------|------|------|------|------|
| TC2100322  | KCNE1          | 3753      | potassium voltage-gated channel, Isk-r   | 5.34E-14 | 1 | 4.70 | 5.26 | 5.58 | 5.52 | 5.26 | 4.86 | 4.93 | 4.74 |
| TC0201460  | KCNQ3          | 170850    | potassium voltage-gated channel, subf    | 0.000314 | 1 | 3.76 | 4.09 | 4.10 | 4.08 | 4.02 | 3.95 | 3.90 | 3.99 |
| TC1200306  | KCNH3          | 23416     | potassium voltage-gated channel, subf    | 0.000345 | 1 | 4.76 | 4.82 | 4.85 | 4.93 | 4.88 | 4.82 | 4.73 | 4.75 |
| TC0202053  | KCNH7          | 90134     | potassium voltage-gated channel, subf    | 2.04E-12 | 1 | 3.39 | 3.41 | 3.75 | 3.97 | 3.68 | 3.41 | 3.40 | 3.28 |
| TC1001090  | KCNMA1         | 3778      | potassium large conductance calcium-e    | 1.22E-11 | 1 | 2.97 | 3.13 | 3.50 | 3.45 | 3.21 | 3.02 | 2.96 | 3.00 |
| TC0100438  | KCNQ4          | 9132      | potassium voltage-gated channel, KQT-    | 0.000127 | 1 | 4.57 | 4.70 | 4.77 | 4.62 | 4.67 | 4.67 | 4.61 | 4.60 |
| TC1700088  | KCTD11 /// CEF | 147040 // | potassium channel tetramerisation dor    | 5.13E-15 | 1 | 6.41 | 7.18 | 7.11 | 6.89 | 6.87 | 6.58 | 6.56 | 6.40 |
| TC0700346  | KCTD7 /// RAB  | 154881 // | potassium channel tetramerisation dor    | 2.20E-31 | 1 | 5.15 | 6.13 | 5.90 | 5.84 | 5.89 | 5.65 | 5.46 | 5.35 |
| TC1901654  | KDEL1          | 10945     | KDEL (Lys-Asp-Glu-Leu) endoplasmic re    | 2.94E-08 | 1 | 4.67 | 5.39 | 5.23 | 5.32 | 5.36 | 5.28 | 5.28 | 5.12 |
| TC1800523  | KDSR           | 2531      | 3-ketodihydrosphingosine reductase       | 0.000171 | 1 | 3.96 | 4.34 | 4.10 | 3.99 | 4.04 | 4.11 | 4.11 | 4.11 |
| TC1500937  | KIAA0256 /// K | 9728      | KIAA0256 gene product /// Uncharacte     | 0.000952 | 1 | 6.17 | 6.62 | 6.40 | 6.28 | 6.12 | 6.28 | 6.41 | 6.45 |
| TC0700701  | KIAA0265 /// N | 23008     | KIAA0265 protein                         | 1.75E-10 | 1 | 5.57 | 5.84 | 6.02 | 6.01 | 5.89 | 5.80 | 5.84 | 5.80 |
| TC0901245  | KIAA0368       | 23392     | KIAA0368 /// Proteasome-associated p     | 3.15E-11 | 1 | 4.85 | 5.55 | 5.69 | 5.49 | 5.39 | 5.27 | 5.32 | 5.07 |
| TC1300436  | KIAA0564 /// N | 23078     | KIAA0564 /// OTTHUMP00000018323.         | 8.22E-10 | 1 | 3.57 | 4.42 | 4.26 | 4.10 | 4.06 | 3.86 | 3.82 | 3.69 |
| TC1400266  | KIAA0586       | 9786      | KIAA0586 /// Uncharacterized protein l   | 2.30E-07 | 1 | 4.30 | 4.84 | 4.87 | 4.62 | 4.57 | 4.48 | 4.53 | 4.34 |
| TC0400865  | KIAA0746       | 23231     | KIAA0746 protein                         | 1.62E-21 | 1 | 3.95 | 5.15 | 5.98 | 5.81 | 5.43 | 4.65 | 4.55 | 4.29 |
| TC0600577  | KIAA0776       | 23376     | KIAA0776                                 | 1.11E-05 | 1 | 3.89 | 4.85 | 4.90 | 4.66 | 4.71 | 4.63 | 4.73 | 4.54 |
| TC1000335  | KIAA0974       | ---       | ---                                      | 5.81E-11 | 1 | 4.08 | 4.56 | 4.69 | 4.74 | 4.60 | 4.50 | 4.51 | 4.39 |
| TC0100722  | KIAA1107       | ---       | ---                                      | 5.05E-08 | 1 | 2.85 | 3.05 | 3.62 | 3.52 | 2.99 | 3.10 | 3.12 | 3.01 |
| TC1000856  | KIAA1462       | 57608     | KIAA1462                                 | 7.81E-08 | 1 | 3.02 | 3.31 | 3.27 | 3.21 | 3.21 | 3.18 | 3.13 | 3.15 |
| TC1201179  | KIAA1602       | 57701     | KIAA1602 /// Uncharacterized protein l   | 1.26E-06 | 1 | 4.80 | 5.02 | 4.97 | 4.92 | 4.95 | 4.87 | 4.79 | 4.79 |
| TC1300118  | KIAA1704       | 55425     | KIAA1704 /// KIAA1704 (Novel protein)    | 0.00027  | 1 | 4.09 | 4.55 | 4.55 | 4.61 | 4.64 | 4.53 | 4.58 | 4.49 |
| TC0202119  | KIAA1715       | 80856     | KIAA1715                                 | 4.64E-15 | 1 | 5.03 | 6.27 | 6.65 | 6.54 | 6.70 | 6.50 | 6.34 | 6.18 |
| TC0900490  | KIAA1958       | 158405    | KIAA1958 /// Uncharacterized protein l   | 0.000429 | 1 | 3.63 | 4.01 | 4.01 | 4.01 | 3.96 | 3.95 | 3.92 | 3.91 |
| TC2000572  | KIF16B /// C20 | 55614     | kinesin family member 16B /// Kinesin-   | 0.000495 | 1 | 3.49 | 3.81 | 3.94 | 3.78 | 3.72 | 3.64 | 3.76 | 3.62 |
| TC0100106  | KIF1B          | 23095     | kinesin family member 1B /// Kinesin-li  | 1.82E-23 | 1 | 6.35 | 8.00 | 7.77 | 7.60 | 7.52 | 7.16 | 7.02 | 6.78 |
| TC0201370  | KIF3C          | 3797      | kinesin family member 3C                 | 7.43E-21 | 1 | 5.17 | 6.28 | 6.39 | 6.16 | 6.08 | 5.76 | 5.61 | 5.48 |
| TC1000869  | KIF5B          | 3799      | kinesin family member 5B                 | 0.000282 | 1 | 8.00 | 8.55 | 8.51 | 8.46 | 8.42 | 8.45 | 8.49 | 8.40 |
| TC19r00004 | KIR2DL4        | 3805      | killer cell immunoglobulin-like receptor | 1.25E-05 | 1 | 3.86 | 4.15 | 4.16 | 4.03 | 4.08 | 4.04 | 3.88 | 3.95 |
| TC1300077  | KL             | 9365      | klotho                                   | 1.79E-24 | 1 | 3.26 | 4.91 | 4.71 | 4.17 | 4.01 | 3.81 | 3.58 | 3.53 |
| TC1500169  | KLF13          | 51621     | Kruppel-like factor 13                   | 9.50E-05 | 1 | 5.00 | 5.27 | 5.31 | 5.28 | 5.28 | 5.11 | 5.10 | 5.11 |
| TC0701637  | KLF14          | 136259    | Kruppel-like factor 14                   | 0.00071  | 1 | 3.77 | 3.98 | 4.02 | 4.00 | 3.96 | 3.71 | 3.73 | 3.84 |
| TC1901008  | KLF16          | 83855     | Kruppel-like factor 16                   | 6.49E-05 | 1 | 5.57 | 5.99 | 6.07 | 6.05 | 6.07 | 6.02 | 5.97 | 5.96 |
| TC0901030  | KLF9           | 687       | Kruppel-like factor 9                    | 7.04E-08 | 1 | 3.67 | 4.36 | 4.45 | 4.17 | 3.97 | 3.87 | 3.88 | 3.79 |

|           |               |        |                                            |          |   |      |      |      |      |      |      |      |      |
|-----------|---------------|--------|--------------------------------------------|----------|---|------|------|------|------|------|------|------|------|
| TC1400210 | KLHDC1        | 122773 | kelch domain containing 1                  | 0.000129 | 1 | 3.52 | 3.96 | 4.20 | 4.20 | 4.07 | 4.15 | 4.06 | 4.06 |
| TC0103133 | KLHL12        | 59349  | kelch-like 12 (Drosophila) /// Kelch-like  | 2.91E-06 | 1 | 5.25 | 5.55 | 5.71 | 5.56 | 5.36 | 5.43 | 5.44 | 5.33 |
| TC0X00819 | KLHL15        | 80311  | kelch-like 15 (Drosophila)                 | 7.50E-14 | 1 | 4.37 | 5.64 | 5.24 | 4.90 | 4.80 | 4.81 | 4.78 | 4.70 |
| TC0400660 | KLHL2         | 11275  | kelch-like 2, Mayven (Drosophila)          | 1.79E-27 | 1 | 8.15 | 9.46 | 9.68 | 9.44 | 9.20 | 8.98 | 8.77 | 8.65 |
| TC0400166 | KLHL5         | 51088  | kelch-like 5 (Drosophila) /// Kelch-like 5 | 5.72E-07 | 1 | 4.98 | 5.50 | 5.58 | 5.71 | 5.28 | 5.06 | 5.31 | 5.21 |
| TC0401105 | KLHL8         | 57563  | kelch-like 8 (Drosophila)                  | 1.86E-06 | 1 | 6.86 | 7.44 | 7.64 | 7.75 | 7.56 | 7.43 | 7.43 | 7.49 |
| TC0101665 | KMO           | 8564   | kynurenine 3-monooxygenase (kynurer        | 6.90E-08 | 1 | 2.37 | 2.66 | 2.70 | 2.51 | 2.46 | 2.39 | 2.44 | 2.42 |
| TC1300486 | KPNA3         | 3839   | karyopherin alpha 3 (importin alpha 4)     | 3.94E-11 | 1 | 4.18 | 4.70 | 4.88 | 4.99 | 4.87 | 4.89 | 4.81 | 4.75 |
| TC0301709 | KPNA4         | 3840   | karyopherin alpha 4 (importin alpha 3)     | 6.16E-10 | 1 | 6.66 | 7.21 | 7.44 | 7.03 | 6.94 | 7.01 | 6.91 | 6.98 |
| TC1201049 | KRAS          | 3845   | v-Ki-ras2 Kirsten rat sarcoma viral onco   | 1.13E-09 | 1 | 6.90 | 7.87 | 7.79 | 7.70 | 7.61 | 7.73 | 7.62 | 7.56 |
| TC0201700 | KRCC1         | 51315  | lysine-rich coiled-coil 1                  | 3.70E-07 | 1 | 6.92 | 7.42 | 7.65 | 7.54 | 7.46 | 7.59 | 7.62 | 7.52 |
| TC2200172 | KREMEN1       | 83999  | kringle containing transmembrane prot      | 3.57E-10 | 1 | 5.32 | 6.66 | 6.79 | 7.14 | 6.93 | 6.99 | 6.68 | 6.34 |
| TC1701319 | KRT10         | 3858   | keratin 10 (epidermolytic hyperkeratos     | 1.18E-06 | 1 | 3.51 | 3.77 | 3.79 | 3.82 | 3.82 | 3.80 | 3.81 | 3.74 |
| TC1201223 | KRT82         | 3888   | keratin 82                                 | 9.38E-05 | 1 | 3.88 | 4.12 | 4.09 | 4.00 | 4.02 | 4.05 | 3.99 | 4.02 |
| TC2100281 | KRTAP19-5 /// | 337972 | keratin associated protein 19-5 /// kerat  | 1.76E-06 | 1 | 5.01 | 5.88 | 6.00 | 6.03 | 6.01 | 5.90 | 5.68 | 5.70 |
| TC1101628 | KRTAP5-11 --- |        | Keratin-associated protein 5-11 (Keratin   | 0.000597 | 1 | 5.30 | 5.71 | 5.71 | 5.51 | 5.52 | 5.66 | 5.56 | 5.68 |
| TC0600716 | L3MBTL3       | 84456  | l(3)mbt-like 3 (Drosophila)                | 9.31E-11 | 1 | 5.01 | 5.44 | 5.67 | 5.57 | 5.18 | 5.20 | 5.23 | 5.21 |
| TC1500395 | LACTB         | 114294 | lactamase, beta                            | 7.22E-09 | 1 | 5.99 | 7.21 | 7.17 | 7.37 | 7.05 | 7.10 | 7.20 | 7.05 |
| TC1901803 | LAIR1         | 3903   | leukocyte-associated immunoglobulin-       | 3.41E-06 | 1 | 4.69 | 4.92 | 5.22 | 5.44 | 5.38 | 5.12 | 5.14 | 4.95 |
| TC0101348 | LAMC1         | 3915   | laminin, gamma 1 (formerly LAMB2)          | 1.56E-08 | 1 | 3.67 | 3.88 | 3.76 | 3.99 | 4.08 | 3.84 | 3.82 | 3.71 |
| TC1300293 | LAMP1         | 3916   | lysosomal-associated membrane prote        | 1.41E-05 | 1 | 6.14 | 6.61 | 6.60 | 6.61 | 6.62 | 6.57 | 6.44 | 6.45 |
| TC0201341 | LAPTM4A       | 9741   | lysosomal-associated protein transmen      | 1.47E-17 | 1 | 8.57 | 9.18 | 9.47 | 9.25 | 8.96 | 9.11 | 9.05 | 9.06 |
| TC1000721 | LARP5         | 23185  | La ribonucleoprotein domain family, m      | 2.88E-05 | 1 | 6.26 | 6.60 | 6.62 | 6.39 | 6.39 | 6.34 | 6.28 | 6.23 |
| TC1300324 | LATS2         | 26524  | LATS, large tumor suppressor, homolog      | 8.98E-08 | 1 | 5.48 | 5.99 | 5.80 | 6.07 | 5.90 | 5.78 | 5.78 | 5.76 |
| TC0103276 | LBR           | 3930   | lamin B receptor                           | 1.49E-06 | 1 | 8.51 | 8.99 | 8.96 | 8.79 | 8.78 | 8.87 | 8.65 | 8.73 |
| TC1001229 | LBX1          | 10660  | ladybird homeobox 1                        | 0.000136 | 1 | 4.95 | 5.24 | 5.24 | 5.18 | 5.24 | 5.23 | 5.12 | 5.15 |
| TC0900589 | LCN2          | 3934   | lipocalin 2 /// Neutrophil gelatinase-as   | 1.45E-20 | 1 | 5.96 | 8.59 | 8.16 | 8.28 | 8.76 | 8.77 | 8.39 | 7.93 |
| TC1100219 | LDHA          | 3939   | lactate dehydrogenase A /// L-lactate d    | 4.44E-34 | 1 | 6.98 | 9.84 | 9.77 | 9.34 | 9.38 | 8.89 | 8.64 | 8.22 |
| TC1900186 | LDLR          | 3949   | low density lipoprotein receptor (famili   | 9.56E-09 | 1 | 4.60 | 5.05 | 4.93 | 5.16 | 5.25 | 4.83 | 4.75 | 4.62 |
| TC1200487 | LEMD3         | 23592  | LEM domain containing 3                    | 9.39E-08 | 1 | 6.51 | 7.35 | 7.35 | 7.24 | 7.11 | 7.25 | 7.18 | 7.07 |
| TC2200258 | LGALS1        | 3956   | lectin, galactoside-binding, soluble, 1 (ξ | 8.09E-30 | 1 | 5.06 | 8.35 | 8.18 | 8.48 | 7.92 | 6.84 | 6.48 | 6.29 |
| TC1400243 | LGALS3        | 3958   | lectin, galactoside-binding, soluble, 3    | 1.84E-07 | 1 | 6.25 | 7.01 | 6.97 | 6.99 | 7.21 | 6.95 | 6.80 | 6.63 |
| TC0101642 | LGALS8        | 3964   | lectin, galactoside-binding, soluble, 8 (ξ | 5.02E-15 | 1 | 5.39 | 6.41 | 6.27 | 6.11 | 5.86 | 5.77 | 5.78 | 5.62 |
| TC1300646 | LIG4          | 3981   | ligase IV, DNA, ATP-dependent              | 6.50E-16 | 1 | 4.61 | 5.30 | 4.96 | 4.86 | 4.78 | 4.71 | 4.65 | 4.60 |

|           |                           |           |                                           |          |   |      |      |      |      |      |      |      |      |
|-----------|---------------------------|-----------|-------------------------------------------|----------|---|------|------|------|------|------|------|------|------|
| TC1901801 | LILRA5                    | 353514    | leukocyte immunoglobulin-like recepto     | 1.84E-28 | 1 | 6.44 | 8.41 | 8.52 | 8.38 | 8.12 | 7.79 | 7.52 | 7.30 |
| TC1901797 | LILRA6 /// LILR.79168 /// |           | leukocyte immunoglobulin-like recepto     | 5.76E-06 | 1 | 7.73 | 7.99 | 8.02 | 8.01 | 7.91 | 7.77 | 7.68 | 7.70 |
| TC1900867 | LILRB4                    | 11006     | leukocyte immunoglobulin-like recepto     | 0.000166 | 1 | 5.71 | 5.82 | 5.85 | 5.78 | 5.74 | 5.70 | 5.67 | 5.63 |
| TC0200570 | LIMS3                     | 96626     | LIM and senescent cell antigen-like dor   | 2.01E-12 | 1 | 4.18 | 5.34 | 5.19 | 5.17 | 5.28 | 5.19 | 5.00 | 4.92 |
| TC0401086 | LIN54                     | 132660    | lin-54 homolog (C. elegans)               | 7.07E-14 | 1 | 5.75 | 6.63 | 6.55 | 6.35 | 6.17 | 6.22 | 6.23 | 6.20 |
| TC1201419 | LIN7A                     | 8825      | lin-7 homolog A (C. elegans)              | 3.18E-07 | 1 | 8.41 | 8.80 | 8.95 | 8.88 | 8.80 | 8.76 | 8.66 | 8.55 |
| TC1900707 | LIN7B                     | 64130     | lin-7 homolog B (C. elegans)              | 5.65E-05 | 1 | 5.02 | 5.33 | 5.29 | 5.34 | 5.34 | 5.37 | 5.34 | 5.25 |
| TC1101272 | LIN7C                     | 55327     | lin-7 homolog C (C. elegans)              | 2.75E-06 | 1 | 5.97 | 6.80 | 6.86 | 6.84 | 6.83 | 6.84 | 6.78 | 6.73 |
| TC1000422 | LIPM                      | 340654    | lipase, family member M                   | 0.000598 | 1 | 3.23 | 3.81 | 3.83 | 3.48 | 3.48 | 3.50 | 3.57 | 3.50 |
| TC1000421 | LIPN                      | 643418    | lipase, family member N                   | 1.47E-12 | 1 | 5.24 | 7.70 | 7.26 | 6.62 | 5.88 | 6.40 | 6.09 | 6.23 |
| TC0501526 | LMAN2                     | 10960     | lectin, mannose-binding 2                 | 0.00039  | 1 | 7.73 | 8.13 | 8.12 | 8.31 | 8.20 | 8.17 | 8.10 | 8.08 |
| TC0701796 | LMBR1                     | 64327     | limb region 1 homolog (mouse) /// Lim     | 6.20E-08 | 1 | 5.30 | 6.05 | 5.88 | 5.69 | 5.80 | 5.72 | 5.62 | 5.58 |
| TC0500441 | LMNB1                     | 4001      | lamin B1                                  | 6.18E-23 | 1 | 6.31 | 7.74 | 7.61 | 7.63 | 7.59 | 7.55 | 7.50 | 7.33 |
| TC0700505 | LMTK2                     | 22853     | lemur tyrosine kinase 2                   | 2.64E-07 | 1 | 7.14 | 7.96 | 7.52 | 7.41 | 7.35 | 7.43 | 7.30 | 7.35 |
| TC1700783 | LOC124512                 | 124512    | hypothetical protein LOC124512            | 0.000103 | 1 | 4.98 | 5.39 | 5.35 | 5.31 | 5.45 | 5.38 | 5.35 | 5.22 |
| TC1701075 | LOC201164                 | 201164    | similar to CG12314 gene product           | 0.000233 | 1 | 4.31 | 4.50 | 4.48 | 4.22 | 4.68 | 4.61 | 4.47 | 4.14 |
| TC0X00664 | LOC203547 ///             | 203547    | hypothetical protein LOC203547            | 4.76E-09 | 1 | 3.87 | 4.51 | 4.64 | 4.56 | 4.62 | 4.54 | 4.59 | 4.33 |
| TC0400025 | LOC401115                 | 401115    | hypothetical LOC401115                    | 6.61E-11 | 1 | 6.58 | 6.92 | 6.93 | 7.01 | 7.02 | 6.96 | 6.86 | 6.89 |
| TC0401216 | LOC401152                 | 401152    | HCV F-transactivated protein 1            | 2.05E-22 | 1 | 5.98 | 6.88 | 7.00 | 6.79 | 6.66 | 6.69 | 6.61 | 6.60 |
| TC0400196 | LOC402175                 | 402175    | hypothetical gene supported by AF044      | 5.89E-05 | 1 | 4.60 | 5.43 | 5.61 | 5.44 | 5.48 | 5.50 | 5.38 | 5.37 |
| TC1800018 | LOC642076 ///             | 642076 // | similar to myosin regulatory light chain  | 3.31E-23 | 1 | 8.20 | 8.71 | 8.89 | 8.80 | 8.75 | 8.75 | 8.68 | 8.63 |
| TC0701222 | LOC645317 ///             | 645317 // | similar to 16.7Kd protein /// coiled-coil | 3.45E-06 | 1 | 6.15 | 6.87 | 7.04 | 6.86 | 6.91 | 6.96 | 6.98 | 6.92 |
| TC0700048 | LOC652200 ///             | 652200 // | similar to CG14980-PB /// chromosome      | 2.64E-14 | 1 | 6.57 | 7.24 | 7.47 | 7.31 | 7.24 | 7.23 | 7.20 | 7.14 |
| TC0701004 | LOC652200 ///             | 652200 // | similar to CG14980-PB /// chromosome      | 9.81E-15 | 1 | 5.75 | 6.34 | 6.56 | 6.34 | 6.32 | 6.33 | 6.31 | 6.26 |
| TC1700340 | LOC652330 ///             | 652330 // | similar to neurofibromin /// neurofibro   | 6.49E-17 | 1 | 5.34 | 6.16 | 5.93 | 5.59 | 5.45 | 5.41 | 5.41 | 5.37 |
| TC0801324 | LOC652460 ///             | 652460 // | similar to Plectin 1 (PLTN) (PCN) (Hemic  | 1.12E-11 | 1 | 5.07 | 5.54 | 5.47 | 5.38 | 5.40 | 5.26 | 5.17 | 5.17 |
| TC0700824 | LOC652795 ///             | 652795 // | similar to hypothetical protein FLJ4072   | 2.61E-09 | 1 | 5.05 | 5.35 | 5.30 | 5.25 | 5.09 | 5.08 | 5.06 | 5.04 |
| TC0701679 | LOC653052 ///             | 653052 // | hypothetical LOC653052 /// homeodor       | 9.32E-18 | 1 | 5.77 | 7.08 | 6.56 | 6.46 | 6.60 | 6.34 | 6.29 | 6.10 |
| TC1001378 | LOC653419                 | 653419    | similar to preproneuropeptide B           | 9.71E-11 | 1 | 6.05 | 6.62 | 6.76 | 6.72 | 6.70 | 6.64 | 6.61 | 6.57 |
| TC1700847 | LOC653419 ///             | 653419 // | similar to preproneuropeptide B /// ne    | 0.000473 | 1 | 6.55 | 6.87 | 6.91 | 6.75 | 6.87 | 6.88 | 6.68 | 6.79 |
| TC0700516 | LOC653888 ///             | 653888 // | similar to Actin-related protein 2/3 con  | 5.63E-09 | 1 | 6.99 | 7.33 | 7.59 | 7.67 | 7.56 | 7.40 | 7.24 | 7.24 |
| TC0700127 | LOC653972 ///             | 653972 // | similar to chromobox homolog 3 /// ch     | 9.55E-16 | 1 | 6.98 | 7.51 | 7.64 | 7.74 | 7.70 | 7.57 | 7.60 | 7.45 |
| TC1300308 | LOC654264 ///             | 654264 // | similar to Tubulin alpha-3 chain (Alpha-  | 0.0009   | 1 | 4.83 | 5.11 | 5.09 | 5.05 | 5.05 | 5.05 | 4.97 | 5.05 |
| TC0200715 | LOC654264 ///             | 654264 // | similar to Tubulin alpha-3 chain (Alpha-  | 0.000167 | 1 | 5.24 | 5.51 | 5.52 | 5.48 | 5.53 | 5.50 | 5.41 | 5.47 |

|           |                         |                                                  |          |   |      |      |      |      |      |      |      |      |
|-----------|-------------------------|--------------------------------------------------|----------|---|------|------|------|------|------|------|------|------|
| TC2200341 | LOC727731               | 727731 similar to metallophosphoesterase don     | 0.00062  | 1 | 4.75 | 4.81 | 4.85 | 4.79 | 4.80 | 4.72 | 4.69 | 4.68 |
| TC0400321 | LOC727738               | 727738 similar to Amphiregulin precursor (AR)    | 0.000254 | 1 | 3.65 | 4.52 | 3.86 | 3.88 | 3.90 | 3.81 | 4.02 | 3.87 |
| TC0400320 | LOC727738 /// 727738 // | similar to Amphiregulin precursor (AR)           | 0.000188 | 1 | 2.89 | 4.00 | 3.10 | 3.20 | 3.15 | 3.07 | 3.39 | 3.20 |
| TC0300538 | LOC727762 /// 727762 // | similar to NADH:ubiquinone oxidoredu             | 3.24E-06 | 1 | 3.67 | 4.06 | 4.16 | 4.02 | 4.11 | 4.08 | 4.02 | 4.06 |
| TC0X01056 | LOC728188 /// 728188 // | similar to phosphoglycerate mutase pro           | 8.39E-13 | 1 | 5.98 | 6.62 | 6.76 | 6.84 | 6.65 | 6.57 | 6.54 | 6.51 |
| TC0501046 | LOC728401               | 728401 hypothetical LOC728401                    | 7.59E-06 | 1 | 2.91 | 3.60 | 4.07 | 3.69 | 3.57 | 3.33 | 3.48 | 2.91 |
| TC0500245 | LOC728401               | 728401 hypothetical LOC728401                    | 0.000193 | 1 | 5.76 | 6.10 | 6.75 | 6.48 | 6.20 | 5.87 | 5.90 | 5.42 |
| TC0501043 | LOC728535 /// 728535 // | NLR family, apoptosis inhibitory proteir         | 3.80E-08 | 1 | 5.93 | 6.38 | 6.59 | 6.38 | 6.29 | 6.25 | 6.26 | 6.02 |
| TC0501047 | LOC728535 /// 728535 // | NLR family, apoptosis inhibitory proteir         | 5.52E-14 | 1 | 6.02 | 6.99 | 7.67 | 7.29 | 6.85 | 6.59 | 6.52 | 6.11 |
| TC0200564 | LOC729260 /// 729260 // | similar to LIM and senescent cell antige         | 3.58E-13 | 1 | 5.37 | 6.73 | 6.48 | 6.54 | 6.67 | 6.58 | 6.33 | 6.23 |
| TC0600892 | LOC729891               | 729891 hypothetical LOC729891                    | 2.52E-05 | 1 | 4.97 | 4.82 | 5.28 | 5.38 | 5.19 | 5.01 | 4.94 | 4.71 |
| TC0500242 | LOC730394 /// 730394 // | general transcription factor IIIH, polype        | 5.30E-05 | 1 | 5.53 | 5.85 | 5.99 | 5.78 | 5.76 | 5.77 | 5.81 | 5.59 |
| TC0701442 | LOC730919 /// 730919    | hypothetical protein LOC730919 /// M             | 5.50E-05 | 1 | 5.24 | 5.52 | 5.51 | 5.45 | 5.39 | 5.42 | 5.35 | 5.37 |
| TC1000417 | LOC731292 /// 731292 // | similar to Phosphatidylinositol-3,4,5-tri        | 1.06E-08 | 1 | 8.51 | 8.87 | 8.99 | 8.69 | 8.54 | 8.76 | 8.64 | 8.78 |
| TC1100953 | LOH11CR2A               | 4013 loss of heterozygosity, 11, chromosom       | 5.68E-07 | 1 | 3.59 | 3.69 | 3.88 | 4.12 | 3.81 | 3.71 | 3.68 | 3.71 |
| TC1200143 | LOH12CR1                | 118426 loss of heterozygosity, 12, chromosom     | 1.36E-06 | 1 | 4.83 | 5.15 | 5.07 | 4.94 | 5.07 | 5.06 | 4.76 | 4.80 |
| TC1800443 | LOXHD1                  | 125336 lipoxygenase homology domains 1 /// l     | 1.39E-16 | 1 | 4.36 | 5.29 | 4.73 | 4.85 | 4.84 | 4.33 | 4.40 | 4.46 |
| TC1600442 | LPCAT2                  | 54947 lysophosphatidylcholine acyltransferas     | 7.50E-07 | 1 | 8.75 | 9.14 | 9.38 | 9.14 | 8.98 | 9.17 | 9.19 | 9.20 |
| TC1300130 | LRCH1                   | 23143 leucine-rich repeats and calponin hom      | 0.000154 | 1 | 3.95 | 4.29 | 4.29 | 4.27 | 4.14 | 4.10 | 4.17 | 4.06 |
| TC0400782 | LRPAP1                  | 4043 low density lipoprotein receptor-relate     | 8.66E-14 | 1 | 6.72 | 7.54 | 7.77 | 7.93 | 7.71 | 7.34 | 7.33 | 7.18 |
| TC0102351 | LRRRC40                 | 55631 leucine rich repeat containing 40          | 9.66E-08 | 1 | 3.29 | 3.94 | 4.03 | 3.97 | 3.90 | 3.86 | 3.91 | 3.76 |
| TC0100570 | LRRRC42                 | 115353 leucine rich repeat containing 42 /// Le  | 3.58E-08 | 1 | 4.96 | 5.51 | 5.37 | 5.22 | 5.30 | 5.26 | 5.31 | 5.17 |
| TC0100712 | LRRRC8C                 | 84230 leucine rich repeat containing 8 family,   | 1.43E-08 | 1 | 4.51 | 4.75 | 5.21 | 5.24 | 4.96 | 4.73 | 4.74 | 4.69 |
| TC0301097 | LRRFIP2                 | 9209 leucine rich repeat (in FLII) interacting p | 3.46E-17 | 1 | 5.30 | 6.36 | 6.50 | 6.28 | 6.13 | 6.03 | 6.07 | 5.89 |
| TC0300009 | LRRN1                   | 57633 leucine rich repeat neuronal 1             | 2.18E-14 | 1 | 5.01 | 6.33 | 6.26 | 6.06 | 5.91 | 5.73 | 5.58 | 5.43 |
| TC0800882 | LSM1                    | 27257 LSM1 homolog, U6 small nuclear RNA         | 3.98E-06 | 1 | 5.09 | 5.56 | 5.78 | 5.69 | 5.65 | 5.66 | 5.67 | 5.67 |
| TC0400579 | LSM6                    | 11157 LSM6 homolog, U6 small nuclear RNA         | 2.29E-21 | 1 | 5.26 | 6.74 | 7.16 | 7.08 | 7.00 | 6.68 | 6.52 | 6.43 |
| TC0801305 | LY6H                    | 4062 lymphocyte antigen 6 complex, locus H       | 0.000925 | 1 | 4.94 | 5.04 | 5.08 | 5.04 | 5.01 | 5.05 | 4.88 | 4.98 |
| TC0800937 | LYPLA1                  | 10434 lysophospholipase I /// Acyl-protein thi   | 2.61E-14 | 1 | 5.07 | 5.78 | 6.28 | 6.18 | 6.07 | 5.95 | 5.83 | 5.72 |
| TC1600238 | LYRM1                   | 57149 LYR motif containing 1                     | 1.07E-08 | 1 | 6.06 | 6.67 | 6.86 | 6.70 | 6.49 | 6.55 | 6.56 | 6.63 |
| TC1901064 | M6PRBP1                 | 10226 mannose-6-phosphate receptor bindin        | 9.55E-10 | 1 | 5.05 | 5.83 | 5.82 | 5.76 | 5.67 | 5.54 | 5.38 | 5.38 |
| TC0100415 | MACF1                   | 23499 microtubule-actin crosslinking factor 1    | 2.24E-10 | 1 | 5.84 | 6.23 | 6.90 | 6.82 | 6.28 | 5.81 | 6.10 | 5.66 |
| TC0101859 | MAD2L2                  | 10459 MAD2 mitotic arrest deficient-like 2 (ye   | 1.86E-19 | 1 | 5.50 | 6.20 | 6.28 | 6.20 | 6.14 | 6.06 | 5.96 | 5.88 |
| TC0400018 | MAEA                    | 730744 // macrophage erythroblast attacher       | 0.000536 | 1 | 5.68 | 6.05 | 5.89 | 5.95 | 5.86 | 5.78 | 5.67 | 5.69 |

|            |               |        |                                           |          |   |      |      |      |      |      |      |      |      |
|------------|---------------|--------|-------------------------------------------|----------|---|------|------|------|------|------|------|------|------|
| TC0801310  | MAFA          | 389692 | v-maf musculoaponeurotic fibrosarcorr     | 2.56E-06 | 1 | 5.18 | 5.75 | 5.60 | 5.70 | 5.52 | 5.53 | 5.49 | 5.47 |
| TC1701790  | MAFG          | 4097   | v-maf musculoaponeurotic fibrosarcorr     | 5.92E-22 | 1 | 5.62 | 6.57 | 6.47 | 6.36 | 6.44 | 6.27 | 6.08 | 6.01 |
| TC17r00054 | MAFG          | 4097   | v-maf musculoaponeurotic fibrosarcorr     | 3.65E-20 | 1 | 5.29 | 6.27 | 6.30 | 5.93 | 6.19 | 5.92 | 5.77 | 5.61 |
| TC1600813  | Magmas        | 51025  | mitochondria-associated protein involv    | 1.62E-06 | 1 | 5.48 | 5.79 | 5.78 | 5.89 | 6.02 | 5.87 | 5.76 | 5.64 |
| TC0X01055  | MAGT1 /// IAG | 84061  | magnesium transporter 1 /// Implantat     | 6.76E-11 | 1 | 5.88 | 6.73 | 6.59 | 6.37 | 6.39 | 6.33 | 6.45 | 6.39 |
| TC0800521  | MAL2          | 114569 | mal, T-cell differentiation protein 2     | 2.68E-05 | 1 | 3.65 | 3.94 | 3.92 | 3.89 | 3.89 | 3.93 | 3.87 | 3.82 |
| TC0100880  | MAN1A2        | 10905  | mannosidase, alpha, class 1A, member      | 7.71E-11 | 1 | 5.47 | 6.08 | 6.12 | 6.19 | 6.23 | 6.11 | 6.14 | 6.04 |
| TC1901205  | MAN2B1        | 4125   | mannosidase, alpha, class 2B, member      | 0.000775 | 1 | 5.69 | 5.71 | 5.71 | 5.86 | 5.78 | 5.60 | 5.68 | 5.57 |
| TC1200996  | MANSC1        | 54682  | MANSC domain containing 1 /// MANS        | 5.56E-10 | 1 | 7.44 | 8.28 | 8.50 | 8.52 | 8.43 | 8.27 | 8.02 | 8.02 |
| TC1600655  | MAP1LC3B      | 81631  | microtubule-associated protein 1 light    | 0.000401 | 1 | 6.02 | 6.37 | 6.36 | 6.35 | 6.30 | 6.29 | 6.29 | 6.35 |
| TC1500420  | MAP2K1        | 5604   | mitogen-activated protein kinase kinas    | 9.56E-13 | 1 | 5.58 | 6.47 | 6.04 | 6.08 | 6.15 | 6.05 | 6.00 | 5.90 |
| TC1700717  | MAP2K6        | 5608   | mitogen-activated protein kinase kinas    | 6.77E-34 | 1 | 4.64 | 7.45 | 7.88 | 7.66 | 7.16 | 6.62 | 6.57 | 6.09 |
| TC0500191  | MAP3K1        | ---    | Mitogen-activated protein kinase kinas    | 2.10E-06 | 1 | 8.29 | 8.82 | 8.61 | 8.68 | 8.36 | 8.48 | 8.42 | 8.43 |
| TC0300865  | MAP3K13       | 9175   | mitogen-activated protein kinase kinas    | 2.83E-07 | 1 | 3.26 | 3.52 | 3.46 | 3.33 | 3.30 | 3.27 | 3.36 | 3.42 |
| TC0301171  | MAP4          | 732227 | // microtubule-associated protein 4 /// M | 3.53E-05 | 1 | 4.48 | 4.63 | 4.81 | 4.77 | 4.74 | 4.57 | 4.64 | 4.56 |
| TC0200531  | MAP4K4        | 9448   | mitogen-activated protein kinase kinas    | 6.30E-05 | 1 | 8.92 | 9.41 | 9.20 | 9.22 | 9.16 | 9.12 | 9.03 | 9.03 |
| TC2200779  | MAPK11        | 5600   | mitogen-activated protein kinase 11       | 0.000741 | 1 | 4.09 | 4.27 | 4.26 | 4.21 | 4.23 | 4.16 | 4.15 | 4.13 |
| TC0600339  | MAPK14        | 1432   | mitogen-activated protein kinase 14       | 3.40E-28 | 1 | 7.68 | 9.12 | 9.31 | 9.09 | 8.92 | 8.67 | 8.49 | 8.26 |
| TC1400242  | MAPK1IP1L     | 93487  | mitogen-activated protein kinase 1 inte   | 9.83E-18 | 1 | 5.95 | 7.18 | 7.03 | 7.02 | 6.99 | 7.02 | 6.98 | 6.88 |
| TC1500343  | MAPK6         | 5597   | mitogen-activated protein kinase 6        | 1.18E-13 | 1 | 3.90 | 4.65 | 5.27 | 5.20 | 4.99 | 4.60 | 4.47 | 4.29 |
| TC0901334  | MAPKAP1       | 79109  | mitogen-activated protein kinase assoc    | 2.26E-08 | 1 | 5.39 | 5.70 | 5.89 | 5.93 | 5.78 | 5.79 | 5.89 | 5.79 |
| TC0101465  | MAPKAPK2      | 9261   | mitogen-activated protein kinase-activ    | 2.13E-05 | 1 | 7.96 | 8.65 | 8.42 | 8.38 | 8.31 | 8.29 | 8.13 | 8.24 |
| TC2000184  | MAPRE1        | 22919  | microtubule-associated protein, RP/EB     | 4.41E-20 | 1 | 7.13 | 8.08 | 8.16 | 7.93 | 7.80 | 7.62 | 7.54 | 7.61 |
| TC1900150  | MAR2          | 51257  | membrane-associated ring finger (C3H)     | 2.25E-05 | 1 | 5.12 | 5.52 | 5.62 | 5.56 | 5.62 | 5.49 | 5.43 | 5.36 |
| TC0501256  | MAR3          | 648089 | // membrane-associated ring finger (C3H)  | 1.62E-06 | 1 | 5.02 | 5.54 | 5.31 | 5.55 | 5.53 | 5.29 | 5.27 | 5.15 |
| TC1000445  | MAR5          | 54708  | membrane-associated ring finger (C3H)     | 5.03E-11 | 1 | 5.27 | 6.12 | 6.20 | 6.02 | 5.84 | 5.81 | 5.76 | 5.72 |
| TC0600655  | MARCKS        | 4082   | myristoylated alanine-rich protein kina   | 2.61E-17 | 1 | 6.36 | 7.33 | 7.25 | 7.03 | 7.11 | 7.20 | 7.01 | 6.99 |
| TC0500227  | MAST4         | 375449 | microtubule associated serine/threonir    | 1.55E-12 | 1 | 4.05 | 4.32 | 4.91 | 4.92 | 4.68 | 4.46 | 4.38 | 4.23 |
| TC1800485  | MBD2          | 8932   | methyl-CpG binding domain protein 2       | 1.15E-18 | 1 | 8.88 | 9.60 | 9.58 | 9.42 | 9.33 | 9.28 | 9.29 | 9.24 |
| TC0600990  | MBOAT1        | 154141 | membrane bound O-acyltransferase dc       | 0.000165 | 1 | 6.14 | 6.61 | 6.82 | 6.73 | 6.53 | 6.58 | 6.55 | 6.58 |
| TC0201297  | MBOAT2        | 129642 | membrane bound O-acyltransferase dc       | 1.37E-10 | 1 | 6.11 | 6.77 | 7.03 | 6.89 | 6.84 | 6.82 | 6.73 | 6.61 |
| TC1200918  | MBOAT5        | 10162  | membrane bound O-acyltransferase dc       | 1.14E-11 | 1 | 5.86 | 6.85 | 6.93 | 6.69 | 6.52 | 6.48 | 6.40 | 6.23 |
| TC0900919  | MCART1        | 92014  | mitochondrial carrier triple repeat 1     | 5.13E-11 | 1 | 3.68 | 4.29 | 4.02 | 3.96 | 4.15 | 4.07 | 4.07 | 3.98 |
| TC1800403  | MCART2        | 147407 | mitochondrial carrier triple repeat 2     | 0.000414 | 1 | 3.07 | 3.57 | 3.37 | 3.26 | 3.46 | 3.36 | 3.45 | 3.32 |



|           |                         |                                                   |          |   |      |       |      |      |       |      |      |      |
|-----------|-------------------------|---------------------------------------------------|----------|---|------|-------|------|------|-------|------|------|------|
| TC1900129 | MCOLN1                  | 57192 mucolipin 1                                 | 5.87E-06 | 1 | 5.59 | 6.09  | 5.95 | 5.85 | 5.75  | 5.85 | 5.74 | 5.77 |
| TC0501153 | MCTP1                   | 79772 multiple C2 domains, transmembrane 1        | 4.97E-20 | 1 | 6.77 | 7.83  | 8.04 | 8.01 | 7.84  | 7.82 | 7.67 | 7.58 |
| TC1500650 | MCTP2                   | 55784 multiple C2 domains, transmembrane 2        | 1.79E-16 | 1 | 7.75 | 8.39  | 8.39 | 8.06 | 7.92  | 7.82 | 7.62 | 7.49 |
| TC0X00540 | MCTS1                   | 28985 malignant T cell amplified sequence 1 /     | 3.63E-17 | 1 | 3.12 | 3.72  | 3.97 | 3.86 | 3.82  | 3.77 | 3.72 | 3.66 |
| TC0600381 | MDFI                    | 4188 MyoD family inhibitor /// MyoD family        | 0.000861 | 1 | 5.49 | 5.70  | 5.73 | 5.69 | 5.69  | 5.68 | 5.61 | 5.64 |
| TC1400738 | MDP-1 /// CHM 145553 // | magnesium-dependent phosphatase 1                 | 4.48E-05 | 1 | 5.50 | 5.90  | 5.96 | 5.96 | 5.89  | 5.95 | 6.02 | 5.91 |
| TC1800183 | ME2                     | 4200 malic enzyme 2, NAD(+)-dependent, m          | 1.09E-07 | 1 | 7.91 | 8.30  | 8.53 | 8.28 | 8.21  | 8.27 | 8.16 | 8.11 |
| TC0601598 | MED23                   | 9439 mediator complex subunit 23 /// CRSP         | 1.68E-05 | 1 | 5.35 | 5.55  | 5.74 | 5.58 | 5.47  | 5.40 | 5.40 | 5.31 |
| TC1400960 | MED6                    | 10001 mediator complex subunit 6                  | 8.30E-06 | 1 | 5.12 | 5.32  | 5.41 | 5.20 | 5.01  | 5.25 | 5.46 | 5.40 |
| TC0501448 | MED7                    | 9443 mediator complex subunit 7                   | 7.42E-07 | 1 | 4.63 | 4.96  | 5.01 | 4.79 | 4.78  | 4.86 | 4.77 | 4.81 |
| TC1500668 | MEF2A                   | 4205 myocyte enhancer factor 2A /// Myocy         | 9.25E-21 | 1 | 6.12 | 7.45  | 7.79 | 7.53 | 7.04  | 6.92 | 6.90 | 6.64 |
| TC1101522 | MEN1                    | 4221 multiple endocrine neoplasia I /// Men       | 0.000889 | 1 | 4.86 | 5.02  | 4.97 | 4.97 | 5.04  | 4.98 | 4.93 | 4.95 |
| TC0200578 | MERTK                   | 10461 c-mer proto-oncogene tyrosine kinase        | 7.93E-10 | 1 | 3.39 | 4.28  | 5.00 | 4.27 | 4.10  | 3.71 | 3.59 | 3.50 |
| TC1500546 | MESDC1                  | 59274 mesoderm development candidate 1            | 7.69E-12 | 1 | 5.91 | 6.61  | 6.76 | 6.62 | 6.54  | 6.68 | 6.71 | 6.71 |
| TC1700870 | METRNL                  | 284207 meteorin, glial cell differentiation regul | 7.38E-05 | 1 | 5.43 | 5.97  | 5.97 | 5.91 | 5.78  | 5.98 | 5.88 | 5.87 |
| TC1200409 | METTL7B                 | 196410 methyltransferase like 7B                  | 1.55E-08 | 1 | 4.43 | 4.63  | 4.72 | 5.21 | 5.06  | 4.44 | 4.50 | 4.45 |
| TC1600245 | METTL9                  | 51108 methyltransferase like 9                    | 3.24E-37 | 1 | 6.49 | 8.61  | 8.82 | 8.57 | 8.36  | 7.95 | 7.57 | 7.33 |
| TC1800480 | MEX3C                   | 51320 mex-3 homolog C (C. elegans)                | 1.01E-10 | 1 | 4.72 | 5.40  | 5.41 | 5.41 | 5.35  | 5.31 | 5.36 | 5.29 |
| TC0500625 | MFAP3                   | 4238 microfibrillar-associated protein 3          | 2.54E-08 | 1 | 5.43 | 6.20  | 6.17 | 6.12 | 6.14  | 6.11 | 6.03 | 5.97 |
| TC0201147 | MFF /// C2orf3          | 56947 mitochondrial fission factor /// Unchar     | 1.19E-22 | 1 | 5.04 | 5.85  | 6.23 | 5.92 | 5.76  | 5.64 | 5.64 | 5.50 |
| TC0100129 | MFN2                    | 9927 mitofusin 2 /// Mitofusin-2 (EC 3.6.5.-)     | 2.91E-12 | 1 | 6.51 | 7.62  | 7.52 | 7.70 | 7.65  | 7.46 | 7.29 | 7.24 |
| TC0300749 | MFSD1                   | 64747 major facilitator superfamily domain cc     | 1.35E-07 | 1 | 7.03 | 7.74  | 8.04 | 7.83 | 7.77  | 7.80 | 7.75 | 7.57 |
| TC1700784 | MFSD11                  | 79157 major facilitator superfamily domain cc     | 0.000148 | 1 | 3.74 | 3.90  | 3.99 | 3.91 | 3.87  | 3.79 | 3.86 | 3.80 |
| TC0700767 | MGAM                    | 8972 maltase-glucoamylase (alpha-glucosida        | 8.30E-10 | 1 | 9.39 | 9.70  | 9.91 | 9.69 | 9.53  | 9.26 | 9.12 | 8.99 |
| TC0401170 | MGC16169 ///            | 93627 hypothetical protein MGC16169 /// TB        | 1.91E-09 | 1 | 3.90 | 4.23  | 4.57 | 4.59 | 4.53  | 4.43 | 4.42 | 4.32 |
| TC1701136 | MGC33894                | 256302 transcript expressed during hematopoi      | 0.00023  | 1 | 5.09 | 5.39  | 5.41 | 5.43 | 5.49  | 5.42 | 5.31 | 5.30 |
| TC0100631 | MIER1                   | 57708 mesoderm induction early response 1         | 4.28E-05 | 1 | 7.16 | 7.57  | 7.74 | 7.66 | 7.56  | 7.68 | 7.62 | 7.64 |
| TC2200121 | MIF                     | 4282 macrophage migration inhibitory facto        | 9.46E-07 | 1 | 5.10 | 5.52  | 5.51 | 5.69 | 5.64  | 5.50 | 5.51 | 5.39 |
| TC2000552 | MKKS                    | 8195 McKusick-Kaufman syndrome                    | 1.14E-07 | 1 | 4.60 | 5.07  | 5.22 | 5.22 | 5.16  | 5.21 | 5.19 | 5.12 |
| TC1901083 | MLLT1                   | 4298 myeloid/lymphoid or mixed-lineage leu        | 3.07E-09 | 1 | 5.54 | 6.31  | 6.30 | 6.04 | 5.92  | 5.73 | 5.61 | 5.65 |
| TC1101772 | MMP27                   | 64066 matrix metalloproteinase 27                 | 0.000176 | 1 | 2.61 | 3.03  | 2.91 | 2.81 | 2.90  | 2.88 | 2.78 | 2.72 |
| TC1101773 | MMP8                    | 4317 matrix metalloproteinase 8 (neutrophil       | 3.88E-31 | 1 | 3.88 | 10.08 | 9.69 | 9.67 | 10.24 | 9.99 | 9.08 | 8.08 |
| TC2000330 | MMP9                    | 4318 matrix metalloproteinase 9 (gelatinase       | 1.93E-22 | 1 | 7.11 | 10.29 | 9.95 | 9.64 | 9.77  | 9.05 | 8.41 | 8.20 |
| TC0701797 | MNX1                    | 3110 motor neuron and pancreas homeobox           | 6.93E-06 | 1 | 4.06 | 4.39  | 4.33 | 4.38 | 4.34  | 4.30 | 4.15 | 4.32 |

|           |                        |                                                 |          |   |      |      |      |      |      |      |      |      |
|-----------|------------------------|-------------------------------------------------|----------|---|------|------|------|------|------|------|------|------|
| TC0201631 | MOBKL1B                | 55233 MOB1, Mps One Binder kinase activato      | 0.000443 | 1 | 8.46 | 8.70 | 8.85 | 8.81 | 8.71 | 8.75 | 8.69 | 8.75 |
| TC0102226 | MOBKL2C                | 148932 MOB1, Mps One Binder kinase activato     | 1.72E-09 | 1 | 4.62 | 5.17 | 4.92 | 4.87 | 4.75 | 4.74 | 4.74 | 4.67 |
| TC0401411 | MORF4                  | 10934 mortality factor 4                        | 0.000159 | 1 | 3.36 | 3.83 | 3.86 | 3.75 | 3.67 | 3.68 | 3.72 | 3.72 |
| TC1500531 | MORF4 /// MO10934 ///  | mortality factor 4 /// mortality factor 4       | 1.23E-08 | 1 | 9.08 | 9.43 | 9.43 | 9.37 | 9.28 | 9.26 | 9.26 | 9.27 |
| TC0101530 | MOSC1                  | 64757 MOCO sulphurase C-terminal domain c       | 1.39E-05 | 1 | 6.59 | 7.05 | 7.12 | 7.32 | 7.34 | 7.13 | 6.91 | 6.94 |
| TC0700548 | MOSPD3                 | 64598 motile sperm domain containing 3          | 1.15E-13 | 1 | 4.97 | 5.81 | 6.01 | 5.66 | 5.64 | 5.46 | 5.34 | 5.32 |
| TC0X01396 | MPP1                   | 4354 membrane protein, palmitoylated 1, 5E      | 1.92E-08 | 1 | 8.00 | 8.41 | 8.48 | 8.54 | 8.37 | 8.09 | 8.05 | 7.94 |
| TC1000847 | MPP7                   | 143098 membrane protein, palmitoylated 7 (M     | 1.85E-18 | 1 | 5.08 | 6.20 | 6.58 | 6.65 | 6.51 | 6.34 | 6.36 | 6.16 |
| TC0101333 | MR1                    | 3140 major histocompatibility complex, class    | 1.17E-07 | 1 | 5.60 | 6.45 | 6.36 | 6.16 | 5.95 | 6.09 | 6.21 | 6.13 |
| TC0202298 | MREG                   | 55686 melanoregulin                             | 9.77E-06 | 1 | 3.00 | 3.13 | 3.19 | 3.19 | 3.21 | 3.05 | 2.93 | 2.92 |
| TC0400059 | MRFAP1                 | 93621 Mof4 family associated protein 1          | 2.15E-05 | 1 | 4.99 | 5.35 | 5.39 | 5.30 | 5.21 | 5.29 | 5.29 | 5.34 |
| TC1600712 | MRPL28                 | 10573 mitochondrial ribosomal protein L28       | 1.80E-07 | 1 | 6.07 | 6.57 | 6.44 | 6.58 | 6.55 | 6.49 | 6.41 | 6.40 |
| TC0200137 | MRPL33                 | 9553 mitochondrial ribosomal protein L33 //     | 1.28E-07 | 1 | 6.54 | 7.00 | 7.18 | 7.15 | 7.09 | 7.08 | 7.05 | 7.01 |
| TC0500827 | MRPL36                 | 64979 mitochondrial ribosomal protein L36       | 0.000982 | 1 | 5.79 | 6.18 | 6.19 | 6.15 | 6.24 | 6.20 | 6.08 | 6.09 |
| TC0301785 | MRPL47                 | 57129 mitochondrial ribosomal protein L47       | 1.33E-06 | 1 | 5.13 | 6.03 | 5.98 | 5.97 | 6.00 | 6.02 | 6.08 | 6.02 |
| TC0201637 | MRPL53                 | 116540 mitochondrial ribosomal protein L53      | 2.41E-06 | 1 | 5.52 | 5.95 | 6.19 | 6.22 | 6.21 | 6.12 | 6.14 | 6.03 |
| TC0900689 | MRPS2                  | 51116 mitochondrial ribosomal protein S2        | 6.14E-05 | 1 | 5.00 | 5.25 | 5.29 | 5.19 | 5.24 | 5.20 | 5.13 | 5.15 |
| TC0300660 | MRPS22                 | 56945 mitochondrial ribosomal protein S22       | 4.29E-08 | 1 | 4.58 | 5.27 | 5.46 | 5.35 | 5.27 | 5.20 | 5.21 | 5.13 |
| TC1300424 | MRPS31                 | 10240 mitochondrial ribosomal protein S31       | 1.05E-13 | 1 | 5.50 | 6.65 | 6.79 | 6.52 | 6.26 | 6.22 | 6.35 | 6.11 |
| TC0600126 | MRS2 /// MRS2          | 57380 MRS2 magnesium homeostasis factor h       | 0.000403 | 1 | 3.77 | 3.97 | 4.11 | 4.07 | 4.12 | 4.05 | 4.10 | 3.99 |
| TC1100433 | MS4A4A                 | 51338 membrane-spanning 4-domains, subfam       | 2.94E-08 | 1 | 3.05 | 3.73 | 4.25 | 4.64 | 4.34 | 3.43 | 3.50 | 3.12 |
| TC1101453 | MS4A6A                 | 64231 membrane-spanning 4-domains, subfam       | 4.52E-22 | 1 | 5.22 | 6.99 | 7.55 | 7.30 | 7.00 | 6.75 | 6.66 | 6.21 |
| TC0500309 | MSH3                   | 4437 mutS homolog 3 (E. coli)                   | 2.40E-08 | 1 | 4.84 | 5.58 | 5.88 | 5.94 | 5.83 | 5.59 | 5.62 | 5.42 |
| TC0X00040 | MSL3L1                 | 10943 male-specific lethal 3-like 1 (Drosophila | 3.69E-30 | 1 | 6.45 | 8.14 | 8.43 | 8.09 | 7.84 | 7.60 | 7.50 | 7.15 |
| TC0800060 | MSRA                   | 4482 methionine sulfoxide reductase A /// P     | 5.84E-20 | 1 | 5.46 | 7.06 | 6.81 | 6.55 | 6.66 | 6.37 | 6.22 | 6.02 |
| TC0500723 | MSX2                   | 4488 msh homeobox 2                             | 7.93E-05 | 1 | 2.66 | 2.87 | 3.05 | 2.84 | 3.02 | 2.94 | 2.69 | 3.00 |
| TC1101476 | MTA2                   | 9219 metastasis associated 1 family, membe      | 1.42E-05 | 1 | 5.13 | 5.78 | 5.53 | 5.76 | 5.80 | 5.70 | 5.67 | 5.51 |
| TC0800449 | MTDH                   | 92140 metadherin                                | 1.22E-17 | 1 | 6.17 | 7.73 | 7.80 | 8.01 | 8.10 | 7.93 | 7.93 | 7.53 |
| TC0102133 | MTF1 /// MGA' 4520 /// | metal-regulatory transcription factor 1         | 2.48E-19 | 1 | 7.52 | 8.56 | 8.76 | 8.83 | 8.61 | 8.33 | 8.18 | 8.10 |
| TC0100734 | MTF2                   | 22823 metal response element binding transc     | 8.12E-07 | 1 | 5.07 | 5.94 | 5.85 | 5.65 | 5.67 | 5.80 | 5.91 | 5.79 |
| TC0200355 | MTHFD2                 | 10797 methylenetetrahydrofolate dehydroge       | 4.34E-09 | 1 | 4.04 | 5.25 | 5.39 | 5.77 | 5.59 | 5.51 | 5.45 | 5.22 |
| TC1501155 | MTHFS                  | 10588 5,10-methenyltetrahydrofolate synthet     | 1.97E-14 | 1 | 6.51 | 7.24 | 7.18 | 6.85 | 6.64 | 6.64 | 6.57 | 6.73 |
| TC1300351 | MTMR6                  | 9107 myotubularin related protein 6 /// Myc     | 2.08E-07 | 1 | 6.28 | 7.05 | 6.95 | 6.84 | 6.77 | 6.87 | 6.73 | 6.77 |
| TC0800067 | MTMR9                  | 66036 myotubularin related protein 9            | 0.00026  | 1 | 4.14 | 4.56 | 4.62 | 4.44 | 4.37 | 4.39 | 4.40 | 4.36 |

|            |                                                                 |        |                                          |          |   |      |       |       |       |       |       |       |       |
|------------|-----------------------------------------------------------------|--------|------------------------------------------|----------|---|------|-------|-------|-------|-------|-------|-------|-------|
| TC0600506  | MTO1                                                            | 25821  | mitochondrial translation optimization   | 2.17E-05 | 1 | 4.69 | 5.00  | 5.06  | 5.06  | 5.17  | 5.03  | 5.05  | 4.89  |
| TC0701659  | MTPN                                                            | 136319 | myotrophin                               | 1.96E-11 | 1 | 9.38 | 9.83  | 9.99  | 9.96  | 9.90  | 9.98  | 9.90  | 9.91  |
| TC0601697  | MTRF1L                                                          | 54516  | mitochondrial translational release fact | 0.000893 | 1 | 5.17 | 5.71  | 5.64  | 5.67  | 5.56  | 5.68  | 5.72  | 5.56  |
| TC0500036  | MTRR                                                            | 4552   | 5-methyltetrahydrofolate-homocystein     | 7.75E-23 | 1 | 4.28 | 5.55  | 6.29  | 6.10  | 5.59  | 5.03  | 4.94  | 4.72  |
| TC1100555  | MUS81                                                           | 80198  | MUS81 endonuclease homolog (S. cere      | 1.65E-05 | 1 | 4.90 | 5.01  | 5.08  | 5.02  | 5.03  | 4.96  | 4.96  | 4.91  |
| TC0601311  | MUT                                                             | 4594   | methylmalonyl Coenzyme A mutase          | 9.68E-12 | 1 | 4.51 | 5.29  | 5.36  | 5.22  | 5.16  | 5.02  | 5.07  | 4.97  |
| TC1701720  | MXRA7                                                           | 439921 | matrix-remodelling associated 7 /// Ma   | 4.46E-05 | 1 | 3.68 | 4.60  | 4.72  | 4.83  | 4.85  | 4.57  | 4.50  | 4.25  |
| TC0300159  | MYD88                                                           | 4615   | myeloid differentiation primary respon   | 2.77E-08 | 1 | 7.99 | 8.77  | 8.73  | 8.92  | 8.83  | 8.81  | 8.54  | 8.53  |
| TC0202435  | MYEOV2                                                          | 150678 | myeloma overexpressed 2                  | 8.52E-09 | 1 | 4.94 | 5.44  | 5.69  | 5.69  | 5.70  | 5.56  | 5.51  | 5.49  |
| TC1200426  | MYL6B /// MYL140465 // myosin, light chain 6B, alkali, smooth m | 140465 | myosin, light chain 6B, alkali, smooth m | 1.65E-15 | 1 | 6.60 | 7.03  | 7.09  | 7.05  | 7.04  | 7.01  | 6.94  | 6.91  |
| TC0300775  | MYNN                                                            | 55892  | myoneurin /// Myoneurin (Zinc finger a   | 3.20E-06 | 1 | 5.12 | 5.61  | 5.51  | 5.35  | 5.24  | 5.47  | 5.39  | 5.51  |
| TC0500869  | MYO10                                                           | 4651   | myosin X                                 | 0.000923 | 1 | 3.61 | 3.93  | 4.21  | 4.10  | 4.13  | 4.17  | 3.99  | 3.78  |
| TC1501002  | MYO1E                                                           | 4643   | myosin IE                                | 0.000183 | 1 | 3.09 | 3.24  | 3.17  | 3.13  | 3.09  | 3.11  | 3.12  | 3.10  |
| TC0701181  | MYO1G                                                           | 64005  | myosin IG                                | 9.20E-06 | 1 | 5.46 | 5.86  | 5.70  | 5.58  | 5.54  | 5.50  | 5.54  | 5.50  |
| TC1701588  | NACA2                                                           | 342538 | nascent polypeptide-associated compl     | 0.00035  | 1 | 2.38 | 2.59  | 2.76  | 2.69  | 2.74  | 2.69  | 2.68  | 2.69  |
| TC0900427  | NANS                                                            | 54187  | N-acetylneuraminic acid synthase (siali  | 1.97E-10 | 1 | 5.40 | 5.95  | 6.17  | 5.97  | 5.89  | 5.91  | 5.85  | 5.61  |
| TC0801313  | NAPRT1                                                          | 93100  | nicotinate phosphoribosyltransferase d   | 2.68E-05 | 1 | 5.50 | 5.77  | 5.78  | 5.66  | 5.74  | 5.63  | 5.55  | 5.53  |
| TC1700863  | NARF                                                            | 26502  | nuclear prelamin A recognition factor    | 1.69E-05 | 1 | 7.38 | 7.73  | 7.57  | 7.70  | 7.59  | 7.52  | 7.46  | 7.34  |
| TC1300101  | NARG1L                                                          | 79612  | NMDA receptor regulated 1-like /// NM    | 0.000123 | 1 | 3.81 | 4.14  | 4.24  | 4.16  | 4.12  | 4.18  | 4.11  | 4.07  |
| TC0100499  | NASP                                                            | 4678   | nuclear autoantigenic sperm protein (h   | 0.000284 | 1 | 5.37 | 6.32  | 6.08  | 6.05  | 6.00  | 6.06  | 6.31  | 6.03  |
| TC1100225  | NAV2                                                            | 89797  | neuron navigator 2 /// Neuron navigat    | 1.70E-05 | 1 | 3.17 | 3.36  | 3.26  | 3.20  | 3.34  | 3.32  | 3.21  | 3.21  |
| TC0200550  | NCK2                                                            | 8440   | NCK adaptor protein 2                    | 6.04E-05 | 1 | 5.61 | 6.13  | 5.91  | 5.92  | 6.02  | 5.92  | 5.94  | 5.85  |
| TC1200390  | NCKAP1L                                                         | 3071   | NCK-associated protein 1-like            | 6.22E-12 | 1 | 7.48 | 8.05  | 8.42  | 8.22  | 7.94  | 7.77  | 7.79  | 7.62  |
| TC0600702  | NCOA7                                                           | 135112 | nuclear receptor coactivator 7 /// Nucl  | 2.35E-14 | 1 | 4.47 | 5.76  | 5.73  | 5.77  | 5.85  | 5.73  | 5.74  | 5.40  |
| TC0500565  | NDFIP1                                                          | 80762  | Nedd4 family interacting protein 1 /// I | 1.90E-15 | 1 | 5.75 | 6.41  | 6.70  | 6.53  | 6.34  | 6.41  | 6.43  | 6.34  |
| TC0801264  | NDRG1                                                           | 10397  | N-myc downstream regulated gene 1 //,    | 1.42E-05 | 1 | 6.84 | 7.25  | 7.17  | 7.27  | 7.14  | 6.96  | 6.82  | 6.73  |
| TC1001078  | NDST2                                                           | 8509   | N-deacetylase/N-sulfotransferase (hep    | 1.86E-17 | 1 | 5.63 | 6.65  | 6.45  | 6.03  | 5.89  | 5.60  | 5.52  | 5.39  |
| TC0X00533  | NDUFA1                                                          | 4694   | NADH dehydrogenase (ubiquinone) 1 a      | 1.38E-20 | 1 | 9.41 | 10.00 | 10.20 | 10.11 | 10.09 | 10.08 | 10.05 | 10.05 |
| TC0701014  | NDUFA4                                                          | 4697   | NADH dehydrogenase (ubiquinone) 1 a      | 7.88E-13 | 1 | 6.26 | 7.28  | 7.59  | 7.47  | 7.47  | 7.38  | 7.34  | 7.21  |
| TC0901305  | NDUFA8                                                          | 4702   | NADH dehydrogenase (ubiquinone) 1 a      | 1.18E-13 | 1 | 4.52 | 6.24  | 6.37  | 6.51  | 6.47  | 6.17  | 6.30  | 5.85  |
| TC1200035  | NDUFA9                                                          | 4704   | NADH dehydrogenase (ubiquinone) 1 a      | 4.64E-07 | 1 | 3.33 | 4.48  | 4.49  | 4.42  | 4.52  | 4.48  | 4.43  | 4.16  |
| TC1500862  | NDUFAF1                                                         | 51103  | NADH dehydrogenase (ubiquinone) 1 a      | 1.88E-19 | 1 | 4.45 | 5.78  | 6.31  | 5.97  | 5.80  | 5.59  | 5.49  | 5.33  |
| TC0200986  | NDUFB3                                                          | 4709   | NADH dehydrogenase (ubiquinone) 1 b      | 1.46E-19 | 1 | 8.52 | 9.49  | 9.87  | 9.78  | 9.63  | 9.58  | 9.51  | 9.47  |
| TC03r00006 | NDUFB4                                                          | 4710   | NADH dehydrogenase (ubiquinone) 1 b      | 3.67E-06 | 1 | 3.64 | 4.04  | 4.22  | 4.16  | 4.18  | 4.14  | 4.15  | 4.12  |

|           |                 |                                                  |          |   |      |      |      |      |      |      |      |      |
|-----------|-----------------|--------------------------------------------------|----------|---|------|------|------|------|------|------|------|------|
| TC0800545 | NDUFB9          | 4715 NADH dehydrogenase (ubiquinone) 1 b         | 5.82E-21 | 1 | 5.72 | 7.58 | 7.87 | 7.69 | 7.76 | 7.49 | 7.22 | 6.95 |
| TC0401272 | NDUFC1          | 4717 NADH dehydrogenase (ubiquinone) 1, s        | 1.67E-07 | 1 | 4.03 | 4.62 | 4.61 | 4.54 | 4.64 | 4.60 | 4.55 | 4.56 |
| TC1101690 | NDUFC2          | 4718 NADH dehydrogenase (ubiquinone) 1, s        | 1.85E-17 | 1 | 4.41 | 5.42 | 5.99 | 5.87 | 5.76 | 5.52 | 5.57 | 5.35 |
| TC0500175 | NDUFS4          | 4724 NADH dehydrogenase (ubiquinone) Fe-         | 3.61E-11 | 1 | 3.83 | 5.08 | 5.29 | 5.02 | 5.17 | 4.99 | 4.77 | 4.59 |
| TC0100413 | NDUFS5          | 4725 NADH dehydrogenase (ubiquinone) Fe-         | 1.36E-23 | 1 | 7.18 | 8.75 | 9.10 | 9.14 | 9.25 | 9.14 | 9.02 | 8.63 |
| TC1800041 | NDUFV2          | 4729 NADH dehydrogenase (ubiquinone) fla         | 4.57E-12 | 1 | 5.25 | 6.15 | 6.25 | 6.25 | 6.07 | 6.15 | 6.19 | 6.00 |
| TC0800425 | NECAB1          | 64168 N-terminal EF-hand calcium binding pro     | 1.35E-22 | 1 | 2.91 | 3.32 | 4.31 | 4.63 | 4.06 | 3.30 | 3.12 | 3.06 |
| TC0100181 | NECAP2          | 55707 NECAP endocytosis associated 2 /// Ad      | 0.000159 | 1 | 6.02 | 6.42 | 6.36 | 6.48 | 6.36 | 6.31 | 6.36 | 6.36 |
| TC1200610 | NEDD1           | 121441 neural precursor cell expressed, develo   | 0.000193 | 1 | 4.13 | 4.75 | 4.91 | 4.66 | 4.66 | 4.53 | 4.63 | 4.57 |
| TC1500976 | NEDD4           | 4734 neural precursor cell expressed, develo     | 1.03E-19 | 1 | 3.58 | 5.54 | 5.81 | 5.24 | 5.23 | 4.83 | 4.50 | 4.12 |
| TC1400739 | NEDD8           | 4738 neural precursor cell expressed, develo     | 1.86E-05 | 1 | 7.42 | 7.91 | 8.01 | 8.01 | 7.87 | 7.86 | 7.89 | 7.82 |
| TC1500495 | NEIL1           | 79661 nei endonuclease VIII-like 1 (E. coli) /// | 3.52E-09 | 1 | 4.44 | 4.71 | 4.58 | 4.51 | 4.54 | 4.49 | 4.44 | 4.43 |
| TC1401001 | NEK9            | 91754 NIMA (never in mitosis gene a)- related    | 7.11E-13 | 1 | 4.95 | 5.64 | 5.48 | 5.33 | 5.19 | 5.00 | 4.98 | 4.97 |
| TC1601077 | NETO2           | 81831 neuropilin (NRP) and tolloid (TLL)-like 2  | 1.83E-08 | 1 | 3.57 | 3.68 | 3.70 | 3.95 | 3.91 | 3.68 | 3.65 | 3.64 |
| TC1201262 | NFE2            | 4778 nuclear factor (erythroid-derived 2), 45    | 3.27E-05 | 1 | 7.62 | 8.24 | 8.16 | 8.26 | 8.05 | 7.91 | 7.62 | 7.66 |
| TC0400429 | NFKB1           | 4790 nuclear factor of kappa light polypeptic    | 8.83E-14 | 1 | 6.82 | 7.56 | 7.74 | 7.76 | 7.53 | 7.39 | 7.40 | 7.24 |
| TC1400790 | NFKBIA          | 4792 nuclear factor of kappa light polypeptic    | 6.80E-06 | 1 | 7.26 | 7.65 | 7.64 | 7.83 | 7.74 | 7.49 | 7.40 | 7.41 |
| TC0300463 | NFKBIZ          | 64332 nuclear factor of kappa light polypeptic   | 1.12E-06 | 1 | 7.53 | 8.17 | 8.01 | 8.03 | 7.86 | 7.91 | 7.73 | 7.65 |
| TC0201590 | NFU1            | 27247 NFU1 iron-sulfur cluster scaffold homo     | 2.71E-14 | 1 | 4.51 | 5.61 | 5.76 | 5.49 | 5.68 | 5.68 | 5.58 | 5.52 |
| TC1300094 | NHLRC3          | 387921 NHL repeat containing 3                   | 5.26E-09 | 1 | 3.64 | 4.81 | 4.80 | 4.48 | 4.55 | 4.40 | 4.37 | 4.07 |
| TC2200569 | NIPSNAP1        | 8508 nipsnap homolog 1 (C. elegans)              | 6.74E-05 | 1 | 4.23 | 4.31 | 4.46 | 4.54 | 4.41 | 4.41 | 4.31 | 4.30 |
| TC0X01193 | NKAP            | 79576 NFKB activating protein                    | 4.07E-06 | 1 | 6.33 | 7.11 | 7.14 | 7.15 | 6.99 | 7.03 | 7.26 | 7.18 |
| TC1901740 | NKG7            | 4818 natural killer cell group 7 sequence        | 8.26E-11 | 1 | 5.65 | 7.90 | 7.82 | 7.88 | 8.60 | 8.33 | 7.82 | 7.11 |
| TC1700276 | NLK             | 51701 nemo-like kinase                           | 5.82E-20 | 1 | 4.93 | 6.25 | 6.35 | 6.39 | 6.34 | 6.24 | 5.99 | 5.85 |
| TC0201419 | NLRC4           | 58484 NLR family, CARD domain containing 4       | 3.76E-31 | 1 | 5.29 | 7.37 | 7.77 | 7.55 | 7.39 | 7.02 | 6.81 | 6.32 |
| TC1901788 | NLRP12          | 91662 NLR family, pyrin domain containing 12     | 0.000161 | 1 | 6.91 | 7.09 | 7.20 | 7.00 | 6.90 | 6.92 | 6.82 | 6.81 |
| TC0101693 | NLRP3           | 114548 NLR family, pyrin domain containing 3 ,   | 2.17E-10 | 1 | 4.87 | 6.61 | 5.84 | 6.01 | 5.73 | 5.50 | 5.43 | 5.22 |
| TC1901200 | NM_00108082 --- | zinc finger protein 799 (ZNF799), mRNA           | 1.94E-06 | 1 | 3.60 | 3.99 | 3.94 | 3.94 | 3.67 | 3.68 | 3.76 | 3.78 |
| TC1300072 | NM_145293 ---   | ---                                              | 3.22E-09 | 1 | 4.35 | 4.68 | 4.65 | 4.60 | 4.56 | 4.45 | 4.33 | 4.37 |
| TC1600746 | NME3            | 4832 non-metastatic cells 3, protein expressi    | 0.000146 | 1 | 5.01 | 5.24 | 5.29 | 5.25 | 5.34 | 5.27 | 5.21 | 5.21 |
| TC1600016 | NME4            | 4833 non-metastatic cells 4, protein expressi    | 3.32E-05 | 1 | 5.19 | 5.39 | 5.37 | 5.45 | 5.51 | 5.43 | 5.34 | 5.29 |
| TC0103058 | NMNAT2          | 23057 nicotinamide nucleotide adenylyltransf     | 2.16E-12 | 1 | 4.21 | 4.40 | 4.45 | 4.28 | 4.25 | 4.23 | 4.14 | 4.14 |
| TC1700516 | NMT1            | 4836 N-myristoyltransferase 1                    | 9.12E-08 | 1 | 5.72 | 6.17 | 6.41 | 6.51 | 6.42 | 6.12 | 6.18 | 6.00 |
| TC0600085 | NOL7            | 51406 nucleolar protein 7, 27kDa                 | 5.19E-21 | 1 | 6.88 | 8.57 | 8.68 | 8.39 | 8.35 | 8.25 | 8.28 | 7.98 |

|           |                      |           |                                           |          |   |      |      |      |      |      |      |      |      |
|-----------|----------------------|-----------|-------------------------------------------|----------|---|------|------|------|------|------|------|------|------|
| TC1701780 | NPLOC4               | 55666     | nuclear protein localization 4 homolog    | 0.000347 | 1 | 5.94 | 6.08 | 6.01 | 6.02 | 6.00 | 5.94 | 5.86 | 5.83 |
| TC0600022 | NQO2 /// NM_         | 4835      | NAD(P)H dehydrogenase, quinone 2 ///      | 0.000135 | 1 | 5.96 | 6.02 | 6.21 | 6.19 | 6.17 | 6.07 | 6.04 | 5.90 |
| TC1700149 | NR_002211.1 ---      |           | Meis homeobox 3 pseudogene 1 (MEIS        | 4.88E-06 | 1 | 3.74 | 4.30 | 4.24 | 4.35 | 4.38 | 4.31 | 4.30 | 4.24 |
| TC1001171 | NR_002319.1 ---      |           | PIP5K1A and PSMD4-like (PIPSL) on chr     | 8.62E-07 | 1 | 4.71 | 5.13 | 5.31 | 5.30 | 5.12 | 5.27 | 5.24 | 5.30 |
| TC0900896 | NR_003051.1 ---      |           | RNA component of mitochondrial RNA        | 5.48E-06 | 1 | 3.86 | 5.74 | 5.94 | 5.59 | 5.83 | 5.59 | 5.05 | 5.15 |
| TC0102938 | NR1I3                | 9970      | nuclear receptor subfamily 1, group I, r  | 0.000171 | 1 | 3.63 | 3.86 | 3.78 | 3.68 | 3.77 | 3.73 | 3.60 | 3.64 |
| TC0600616 | NR2E1                | 7101      | nuclear receptor subfamily 2, group E,    | 2.77E-13 | 1 | 3.22 | 3.64 | 3.67 | 3.54 | 3.48 | 3.38 | 3.30 | 3.21 |
| TC1600954 | NSMCE1               | 197370    | non-SMC element 1 homolog (S. cerevi      | 5.49E-16 | 1 | 4.68 | 5.56 | 5.78 | 5.79 | 5.70 | 5.52 | 5.51 | 5.39 |
| TC0800549 | NSMCE2               | 286053    | non-SMC element 2, MMS21 homolog          | 1.43E-10 | 1 | 4.51 | 5.75 | 5.48 | 5.39 | 5.44 | 5.51 | 5.56 | 5.28 |
| TC0300415 | NSUN3                | 63899     | NOL1/NOP2/Sun domain family, memt         | 4.73E-11 | 1 | 5.89 | 6.15 | 6.51 | 6.76 | 6.39 | 6.26 | 6.25 | 6.26 |
| TC0400184 | NSUN7                | 79730     | NOL1/NOP2/Sun domain family, memt         | 6.74E-16 | 1 | 4.26 | 4.75 | 5.26 | 4.86 | 4.41 | 4.06 | 3.93 | 3.71 |
| TC1201514 | NT5DC3               | 51559     | 5'-nucleotidase domain containing 3       | 6.09E-11 | 1 | 3.22 | 4.02 | 3.79 | 3.67 | 3.91 | 3.79 | 3.65 | 3.54 |
| TC1100507 | NUDT22               | 84304     | nudix (nucleoside diphosphate linked n    | 7.54E-08 | 1 | 4.96 | 5.36 | 5.28 | 5.34 | 5.29 | 5.14 | 5.16 | 5.06 |
| TC0X00491 | NXT2                 | 55916     | nuclear transport factor 2-like export fa | 7.20E-15 | 1 | 4.19 | 4.94 | 5.27 | 5.11 | 5.11 | 5.02 | 4.92 | 4.76 |
| TC1001330 | OAT                  | 648399 // | ornithine aminotransferase (gyrate atr    | 1.21E-26 | 1 | 4.64 | 5.90 | 6.21 | 5.77 | 5.62 | 5.27 | 5.12 | 4.95 |
| TC0400212 | OCIAD1               | 54940     | OCIA domain containing 1                  | 8.03E-05 | 1 | 5.62 | 5.87 | 5.93 | 5.72 | 5.71 | 5.69 | 5.73 | 5.74 |
| TC0X00556 | OCRL                 | 4952      | oculocerebrorenal syndrome of Lowe /      | 5.02E-05 | 1 | 2.97 | 3.40 | 3.36 | 3.28 | 3.56 | 3.44 | 3.32 | 3.18 |
| TC0X01219 | ODZ1                 | 10178     | odz, odd Oz/ten-m homolog 1(Drosoph       | 1.98E-14 | 1 | 3.99 | 5.05 | 4.79 | 4.40 | 4.16 | 3.99 | 3.96 | 3.81 |
| TC1000071 | OLAH                 | 55301     | oleoyl-ACP hydrolase /// S-acyl fatty ac  | 1.90E-13 | 1 | 2.46 | 3.63 | 4.25 | 4.03 | 3.82 | 2.88 | 2.80 | 2.71 |
| TC1300171 | OLFM4                | 10562     | olfactomedin 4                            | 9.56E-10 | 1 | 3.87 | 7.71 | 6.86 | 7.93 | 8.41 | 7.75 | 7.08 | 6.05 |
| TC0801326 | OPLAH                | 26873     | 5-oxoprolinase (ATP-hydrolysing)          | 1.48E-06 | 1 | 5.30 | 5.41 | 5.42 | 5.37 | 5.38 | 5.33 | 5.21 | 5.25 |
| TC2000475 | OPRL1                | 652222 // | opiate receptor-like 1                    | 0.000147 | 1 | 4.60 | 4.82 | 4.93 | 4.92 | 4.82 | 4.85 | 4.71 | 4.74 |
| TC0700826 | OR2F2                | 135948    | olfactory receptor, family 2, subfamily I | 8.94E-07 | 1 | 2.56 | 2.98 | 3.21 | 2.93 | 2.88 | 2.91 | 2.55 | 2.74 |
| TC1200766 | ORAI1                | 84876     | ORAI calcium release-activated calcium    | 5.23E-07 | 1 | 4.57 | 5.02 | 5.04 | 4.98 | 5.02 | 4.83 | 4.76 | 4.77 |
| TC0600549 | ORC3L                | 23595     | origin recognition complex, subunit 3-li  | 0.00013  | 1 | 3.81 | 4.01 | 4.09 | 3.90 | 3.86 | 4.07 | 4.07 | 4.08 |
| TC0900504 | ORM2 /// ORM5005 /// | 5005      | orosomuroid 2 /// orosomuroid 1           | 3.61E-07 | 1 | 6.72 | 7.99 | 7.32 | 7.15 | 7.78 | 7.73 | 7.28 | 6.95 |
| TC1200412 | ORMDL2               | 29095     | ORM1-like 2 (S. cerevisiae)               | 2.04E-06 | 1 | 7.22 | 7.92 | 7.96 | 7.84 | 7.89 | 7.85 | 7.77 | 7.74 |
| TC1800380 | OSBPL1A              | 114876    | oxysterol binding protein-like 1A         | 8.19E-08 | 1 | 4.23 | 5.02 | 5.20 | 5.03 | 5.13 | 5.07 | 5.03 | 4.79 |
| TC0100545 | OSBPL9               | 114883    | oxysterol binding protein-like 9 /// Oxy  | 6.93E-18 | 1 | 5.70 | 6.58 | 6.44 | 6.22 | 6.08 | 5.90 | 5.87 | 5.78 |
| TC1901790 | OSCAR                | 126014    | osteoclast associated, immunoglobulin     | 8.39E-13 | 1 | 4.55 | 5.06 | 5.17 | 4.98 | 4.95 | 4.81 | 4.80 | 4.74 |
| TC0300933 | OSTalpha             | 200931    | organic solute transporter alpha          | 2.57E-14 | 1 | 4.67 | 5.46 | 5.53 | 5.06 | 5.04 | 4.93 | 4.84 | 4.73 |
| TC0900300 | OSTF1                | 26578     | osteoclast stimulating factor 1           | 2.21E-07 | 1 | 9.28 | 9.69 | 9.84 | 9.75 | 9.59 | 9.68 | 9.63 | 9.66 |
| TC1000115 | OTUD1                | 220213    | OTU domain containing 1                   | 5.77E-06 | 1 | 6.59 | 6.69 | 7.19 | 7.30 | 7.08 | 7.04 | 6.96 | 6.96 |
| TC0300160 | OXSRI                | 9943      | oxidative-stress responsive 1             | 9.82E-09 | 1 | 6.53 | 7.48 | 7.26 | 7.18 | 7.29 | 7.27 | 7.16 | 6.97 |

|            |          |                                                 |          |   |      |      |       |       |      |      |      |      |
|------------|----------|-------------------------------------------------|----------|---|------|------|-------|-------|------|------|------|------|
| TC1001060  | P4HA1    | 5033 procollagen-proline, 2-oxoglutarate 4-c    | 2.96E-07 | 1 | 5.30 | 5.95 | 5.72  | 6.13  | 5.86 | 5.67 | 5.69 | 5.67 |
| TC0600865  | PACRG    | 135138 PARK2 co-regulated                       | 5.06E-05 | 1 | 3.52 | 3.68 | 3.67  | 3.54  | 3.59 | 3.58 | 3.51 | 3.56 |
| TC0100197  | PADI4    | 23569 peptidyl arginine deiminase, type IV ///  | 1.50E-08 | 1 | 7.55 | 8.68 | 8.19  | 8.06  | 8.32 | 8.05 | 7.58 | 7.51 |
| TC1700024  | PAFAH1B1 | 5048 platelet-activating factor acetylhydrola   | 0.000219 | 1 | 8.38 | 8.70 | 8.71  | 8.68  | 8.57 | 8.64 | 8.60 | 8.58 |
| TC0801063  | PAG1     | 55824 phosphoprotein associated with glycos     | 6.10E-24 | 1 | 5.79 | 7.54 | 7.56  | 7.35  | 7.25 | 7.12 | 7.01 | 6.70 |
| TC0501478  | PANK3    | 79646 pantothenate kinase 3                     | 1.74E-13 | 1 | 4.56 | 5.79 | 5.70  | 5.44  | 5.43 | 5.36 | 5.34 | 5.12 |
| TC0500303  | PAPD4    | 167153 PAP associated domain containing 4       | 3.55E-10 | 1 | 7.72 | 8.22 | 8.41  | 8.23  | 8.08 | 8.06 | 7.98 | 7.98 |
| TC1000415  | PAPSS2   | 9060 3'-phosphoadenosine 5'-phosphosulfat       | 2.81E-05 | 1 | 4.51 | 5.05 | 4.86  | 4.86  | 4.94 | 4.92 | 4.82 | 4.74 |
| TC0301808  | PARL     | 55486 presenilin associated, rhomboid-like      | 0.000179 | 1 | 5.60 | 5.87 | 6.40  | 5.94  | 5.76 | 5.72 | 5.89 | 5.73 |
| TC0600806  | PCMT1    | 5110 protein-L-isoaspartate (D-aspartate) O-    | 1.57E-40 | 1 | 6.55 | 8.11 | 8.23  | 7.99  | 7.98 | 7.72 | 7.56 | 7.46 |
| TC1700611  | PCTP     | 58488 phosphatidylcholine transfer protein      | 0.000619 | 1 | 4.87 | 5.25 | 5.28  | 5.17  | 5.02 | 5.07 | 5.04 | 5.07 |
| TC0301733  | PDCD10   | 11235 programmed cell death 10                  | 9.67E-10 | 1 | 8.12 | 8.59 | 8.80  | 8.58  | 8.47 | 8.55 | 8.52 | 8.51 |
| TC0501002  | PDE4D    | 5144 phosphodiesterase 4D, cAMP-specific (      | 5.19E-10 | 1 | 4.13 | 5.14 | 5.02  | 4.81  | 4.85 | 4.70 | 4.63 | 4.46 |
| TC0401355  | PDGFC    | 56034 platelet derived growth factor C          | 1.18E-23 | 1 | 3.30 | 4.13 | 5.58  | 5.53  | 4.75 | 3.84 | 3.62 | 3.55 |
| TC0301297  | PDHB     | 5162 pyruvate dehydrogenase (lipoamide) b       | 0.000473 | 1 | 5.23 | 5.64 | 5.68  | 5.70  | 5.64 | 5.66 | 5.73 | 5.58 |
| TC0X00099  | PDK3     | 5165 pyruvate dehydrogenase kinase, isozym      | 0.00055  | 1 | 6.17 | 6.54 | 6.67  | 6.74  | 6.60 | 6.65 | 6.55 | 6.58 |
| TC1000128  | PDSS1    | 23590 prenyl (decaprenyl) diphosphate synth     | 4.30E-16 | 1 | 4.55 | 5.71 | 6.07  | 5.46  | 5.17 | 4.89 | 4.84 | 4.72 |
| TC2100163  | PDXK     | 8566 pyridoxal (pyridoxine, vitamin B6) kina    | 3.34E-12 | 1 | 5.62 | 6.53 | 6.24  | 6.41  | 6.63 | 6.52 | 6.32 | 6.19 |
| TC1001299  | PDZD8    | 118987 PDZ domain containing 8                  | 1.49E-08 | 1 | 7.50 | 8.32 | 8.29  | 8.05  | 8.11 | 8.11 | 7.99 | 7.78 |
| TC0202299  | PECR     | 55825 peroxisomal trans-2-enoyl-CoA reducta     | 2.13E-30 | 1 | 3.99 | 6.38 | 6.84  | 6.69  | 6.54 | 5.80 | 5.42 | 4.90 |
| TC0102070  | PEF1     | 553115 penta-EF-hand domain containing 1        | 3.08E-09 | 1 | 5.32 | 5.79 | 5.69  | 5.70  | 5.66 | 5.61 | 5.52 | 5.49 |
| TC0202428  | PER2     | 8864 period homolog 2 (Drosophila) ///< Peric   | 1.70E-07 | 1 | 4.60 | 5.06 | 4.91  | 5.03  | 5.10 | 4.98 | 4.85 | 4.84 |
| TC0601640  | PERP     | 64065 PERP, TP53 apoptosis effector             | 0.000181 | 1 | 4.76 | 5.06 | 4.97  | 4.98  | 5.04 | 4.94 | 4.88 | 4.86 |
| TC0200271  | PEX13    | 5194 peroxisome biogenesis factor 13            | 0.000136 | 1 | 4.79 | 5.15 | 5.18  | 5.11  | 5.13 | 5.16 | 5.20 | 5.13 |
| TC0501344  | PFDN1    | 5201 prefoldin subunit 1                        | 2.43E-09 | 1 | 4.88 | 5.91 | 5.58  | 5.57  | 5.55 | 5.53 | 5.53 | 5.30 |
| TC0101469  | PFKFB2   | 5208 6-phosphofructo-2-kinase/fructose-2,6      | 4.97E-29 | 1 | 5.35 | 8.43 | 8.37  | 7.26  | 6.93 | 6.25 | 6.18 | 5.93 |
| TC1000036  | PFKFB3   | 5209 6-phosphofructo-2-kinase/fructose-2,6      | 6.51E-27 | 1 | 6.16 | 8.71 | 8.37  | 7.94  | 7.74 | 7.23 | 6.86 | 6.64 |
| TC1700945  | PFN1     | 5216 profilin 1                                 | 1.09E-07 | 1 | 6.75 | 7.12 | 7.26  | 7.27  | 7.32 | 7.16 | 7.05 | 7.01 |
| TC0Xr00014 | PGAM4    | 441531 phosphoglycerate mutase family memk      | 1.39E-09 | 1 | 7.03 | 7.71 | 7.84  | 7.82  | 7.75 | 7.59 | 7.64 | 7.62 |
| TC0100108  | PGD      | 5226 phosphogluconate dehydrogenase             | 2.91E-24 | 1 | 8.77 | 9.98 | 10.06 | 10.08 | 9.92 | 9.62 | 9.48 | 9.36 |
| TC0X00377  | PGK1     | 5230 phosphoglycerate kinase 1                  | 6.97E-31 | 1 | 6.76 | 7.78 | 7.89  | 7.65  | 7.48 | 7.36 | 7.26 | 7.17 |
| TC1901615  | PGLYRP1  | 8993 peptidoglycan recognition protein 1        | 3.11E-18 | 1 | 6.65 | 9.16 | 8.84  | 9.05  | 9.63 | 9.20 | 8.78 | 8.34 |
| TC1901263  | PGLYRP2  | 114770 peptidoglycan recognition protein 2 ///< | 0.000468 | 1 | 4.41 | 4.58 | 4.58  | 4.52  | 4.46 | 4.47 | 4.39 | 4.40 |
| TC0100616  | PGM1     | 5236 phosphoglucomutase 1 ///< Phosphoglu       | 3.01E-18 | 1 | 4.58 | 5.80 | 5.81  | 5.95  | 5.89 | 5.65 | 5.45 | 5.32 |

|           |         |        |                                                  |          |   |      |      |      |      |      |      |      |      |
|-----------|---------|--------|--------------------------------------------------|----------|---|------|------|------|------|------|------|------|------|
| TC0400161 | PGM2    | 55276  | phosphoglucomutase 2                             | 4.95E-10 | 1 | 6.98 | 6.98 | 7.69 | 7.62 | 7.35 | 7.28 | 7.28 | 7.22 |
| TC1101658 | PGM2L1  | 283209 | phosphoglucomutase 2-like 1                      | 2.24E-14 | 1 | 3.81 | 4.89 | 5.37 | 4.88 | 4.69 | 4.55 | 4.56 | 4.29 |
| TC0600777 | PHACTR2 | 9749   | phosphatase and actin regulator 2 /// F          | 6.86E-28 | 1 | 4.86 | 7.05 | 7.00 | 6.63 | 6.65 | 6.41 | 6.37 | 6.06 |
| TC0301742 | PHC3    | 80012  | polyhomeotic homolog 3 (Drosophila)              | 0.00088  | 1 | 7.09 | 7.54 | 7.60 | 7.52 | 7.36 | 7.45 | 7.41 | 7.49 |
| TC1100684 | PHCA    | 55331  | phytoceramidase, alkaline                        | 1.16E-21 | 1 | 4.16 | 5.31 | 6.14 | 5.57 | 5.29 | 4.82 | 4.75 | 4.60 |
| TC0X00574 | PHF6    | 84295  | PHD finger protein 6 /// PHD finger pro          | 0.000304 | 1 | 4.17 | 4.66 | 4.76 | 4.67 | 4.68 | 4.67 | 4.69 | 4.54 |
| TC1201403 | PHLDA1  | 22822  | pleckstrin homology-like domain, famil           | 0.000331 | 1 | 3.34 | 3.55 | 3.53 | 3.57 | 3.66 | 3.60 | 3.44 | 3.43 |
| TC1101079 | PHLDA2  | 7262   | pleckstrin homology-like domain, famil           | 6.57E-05 | 1 | 5.85 | 6.09 | 6.16 | 6.16 | 6.23 | 6.13 | 6.04 | 6.06 |
| TC1800232 | PHLPP   | 23239  | PH domain and leucine rich repeat prot           | 5.27E-06 | 1 | 5.23 | 5.92 | 5.82 | 5.95 | 5.88 | 5.76 | 5.62 | 5.61 |
| TC0102557 | PHTF1   | 10745  | putative homeodomain transcription fa            | 1.07E-21 | 1 | 5.45 | 7.16 | 7.17 | 6.87 | 6.67 | 6.37 | 6.36 | 5.98 |
| TC0102373 | PIGK    | 10026  | phosphatidylinositol glycan anchor bio:          | 6.36E-14 | 1 | 4.15 | 5.08 | 5.60 | 5.28 | 5.19 | 5.03 | 5.06 | 4.83 |
| TC1001191 | PIK3AP1 | 118788 | phosphoinositide-3-kinase adaptor pro            | 8.81E-09 | 1 | 8.28 | 9.15 | 9.20 | 9.21 | 8.97 | 8.81 | 8.78 | 8.74 |
| TC0301603 | PIK3CB  | 5291   | phosphoinositide-3-kinase, catalytic, br         | 2.66E-16 | 1 | 6.02 | 6.65 | 6.80 | 6.93 | 6.87 | 6.66 | 6.57 | 6.38 |
| TC0700604 | PIK3CG  | 5294   | phosphoinositide-3-kinase, catalytic, ga         | 4.30E-05 | 1 | 8.29 | 8.81 | 8.59 | 8.61 | 8.53 | 8.54 | 8.40 | 8.46 |
| TC0500229 | PIK3R1  | 5295   | phosphoinositide-3-kinase, regulatory s          | 2.88E-08 | 1 | 6.36 | 6.68 | 6.87 | 7.02 | 6.76 | 6.75 | 6.90 | 6.81 |
| TC0600357 | PIM1    | 5292   | pim-1 oncogene                                   | 6.45E-06 | 1 | 5.57 | 6.28 | 6.10 | 6.00 | 5.80 | 5.87 | 5.87 | 5.84 |
| TC0X00348 | PIN4    | 731103 | // protein (peptidylprolyl cis/trans isomer      | 1.07E-08 | 1 | 4.88 | 5.30 | 5.51 | 5.42 | 5.53 | 5.42 | 5.49 | 5.31 |
| TC0101030 | PIP5K1A | 8394   | phosphatidylinositol-4-phosphate 5-kin           | 5.52E-05 | 1 | 6.61 | 7.12 | 6.96 | 6.88 | 6.74 | 6.86 | 6.78 | 6.76 |
| TC1000727 | PITRM1  | 10531  | pitrilysin metalloproteinase 1 /// Preseq        | 0.000557 | 1 | 4.54 | 4.80 | 4.84 | 4.81 | 4.85 | 4.70 | 4.80 | 4.61 |
| TC0501204 | PJA2    | 9867   | praja 2, RING-H2 motif containing                | 1.61E-06 | 1 | 9.34 | 9.65 | 9.62 | 9.47 | 9.31 | 9.41 | 9.29 | 9.35 |
| TC1501082 | PKM2    | 5315   | pyruvate kinase, muscle /// Pyruvate ki          | 2.50E-35 | 1 | 5.81 | 8.35 | 8.18 | 8.65 | 8.67 | 7.94 | 7.56 | 7.18 |
| TC1900248 | PKN1    | 5585   | protein kinase N1                                | 7.68E-05 | 1 | 5.36 | 5.77 | 5.66 | 5.64 | 5.60 | 5.61 | 5.61 | 5.62 |
| TC0101366 | PLA2G4A | 5321   | phospholipase A2, group IVA (cytosolic           | 1.02E-06 | 1 | 2.93 | 3.79 | 3.44 | 3.62 | 3.76 | 3.57 | 3.59 | 3.42 |
| TC0601304 | PLA2G7  | 7941   | phospholipase A2, group VII (platelet-a          | 2.46E-08 | 1 | 3.08 | 3.61 | 3.38 | 3.23 | 3.26 | 3.22 | 3.27 | 3.32 |
| TC0900834 | PLAA    | 9373   | phospholipase A2-activating protein              | 2.09E-09 | 1 | 5.23 | 5.94 | 5.99 | 5.72 | 5.61 | 5.61 | 5.60 | 5.50 |
| TC0401088 | PLAC8   | 51316  | placenta-specific 8                              | 3.71E-31 | 1 | 3.98 | 7.28 | 8.43 | 8.00 | 7.88 | 7.21 | 6.77 | 6.06 |
| TC0800949 | PLAG1   | 5324   | pleiomorphic adenoma gene 1                      | 7.55E-11 | 1 | 3.39 | 3.90 | 3.94 | 3.68 | 3.61 | 3.62 | 3.64 | 3.62 |
| TC0200140 | PLB1    | 151056 | phospholipase B1 /// phospholipase B1            | 6.46E-08 | 1 | 5.35 | 5.63 | 5.89 | 5.79 | 5.68 | 5.41 | 5.22 | 5.09 |
| TC0301752 | PLD1    | 5337   | phospholipase D1, phosphatidylcholine            | 5.45E-08 | 1 | 4.38 | 5.17 | 5.09 | 5.13 | 5.32 | 5.18 | 4.98 | 4.81 |
| TC0200903 | PLEKHA3 | 65977  | pleckstrin homology domain containing            | 0.000513 | 1 | 5.76 | 6.24 | 6.14 | 6.15 | 6.10 | 6.22 | 6.25 | 6.17 |
| TC0800441 | PLEKHF2 | 79666  | pleckstrin homology domain containing            | 7.91E-08 | 1 | 6.78 | 7.19 | 7.45 | 7.30 | 7.17 | 7.25 | 7.22 | 7.26 |
| TC0600815 | PLEKHG1 | 57480  | pleckstrin homology domain containing            | 6.97E-13 | 1 | 2.98 | 3.15 | 3.57 | 3.75 | 3.49 | 3.18 | 3.07 | 3.01 |
| TC0100128 | PLOD1   | 5351   | procollagen-lysine 1, 2-oxoglutarate 5- $\alpha$ | 2.62E-05 | 1 | 5.75 | 6.09 | 6.15 | 6.39 | 6.29 | 6.19 | 5.95 | 6.01 |
| TC0X00220 | PLP2    | 5355   | proteolipid protein 2 (colonic epitheliu         | 2.26E-13 | 1 | 7.67 | 9.12 | 9.36 | 9.29 | 9.24 | 8.88 | 8.66 | 8.55 |

|           |               |        |                                           |          |   |      |       |       |       |       |       |       |       |
|-----------|---------------|--------|-------------------------------------------|----------|---|------|-------|-------|-------|-------|-------|-------|-------|
| TC0301639 | PLSCR1        | 5359   | phospholipid scramblase 1                 | 1.40E-28 | 1 | 5.27 | 8.03  | 7.90  | 7.42  | 7.32  | 7.34  | 7.14  | 6.99  |
| TC0600342 | PNPLA1        | 285848 | patatin-like phospholipase domain con     | 2.14E-09 | 1 | 5.01 | 5.58  | 5.85  | 5.93  | 5.86  | 5.67  | 5.52  | 5.41  |
| TC1100027 | PNPLA2        | 57104  | patatin-like phospholipase domain con     | 3.90E-05 | 1 | 5.70 | 6.10  | 5.98  | 5.97  | 6.03  | 5.91  | 5.84  | 5.83  |
| TC0701551 | PNPLA8        | 50640  | patatin-like phospholipase domain con     | 1.75E-07 | 1 | 5.27 | 6.08  | 5.91  | 5.78  | 5.66  | 5.81  | 5.83  | 5.81  |
| TC1100664 | POLD3         | 10714  | polymerase (DNA-directed), delta 3, ac    | 0.00038  | 1 | 7.28 | 7.31  | 7.61  | 7.66  | 7.20  | 7.16  | 7.40  | 7.26  |
| TC0200366 | POLE4         | 56655  | polymerase (DNA-directed), epsilon 4 (    | 9.90E-16 | 1 | 5.34 | 7.12  | 7.29  | 7.19  | 7.33  | 7.18  | 7.16  | 6.83  |
| TC1800190 | POLI          | 11201  | polymerase (DNA directed) iota            | 0.000556 | 1 | 4.80 | 4.88  | 5.19  | 5.15  | 5.05  | 4.94  | 4.96  | 4.93  |
| TC0500275 | POLK /// CACN | 51426  | polymerase (DNA directed) kappa /// V     | 2.31E-16 | 1 | 4.59 | 5.36  | 5.71  | 5.65  | 5.40  | 5.14  | 5.19  | 5.07  |
| TC1300059 | POMP          | 51371  | proteasome maturation protein             | 1.22E-16 | 1 | 9.44 | 10.12 | 10.27 | 10.17 | 10.06 | 10.12 | 10.04 | 10.01 |
| TC1900388 | POP4          | 10775  | processing of precursor 4, ribonuclease   | 0.000434 | 1 | 4.91 | 5.43  | 5.56  | 5.53  | 5.35  | 5.35  | 5.50  | 5.38  |
| TC0700410 | POR           | 5447   | P450 (cytochrome) oxidoreductase ///      | 1.07E-14 | 1 | 5.87 | 6.77  | 6.77  | 6.58  | 6.39  | 6.13  | 5.91  | 5.93  |
| TC0701607 | POT1          | 25913  | POT1 protection of telomeres 1 homok      | 7.44E-12 | 1 | 3.48 | 4.12  | 4.17  | 3.82  | 3.72  | 3.74  | 3.83  | 3.75  |
| TC0102137 | POU3F1        | 5453   | POU class 3 homeobox 1                    | 7.78E-05 | 1 | 4.48 | 4.74  | 4.74  | 4.83  | 4.79  | 4.73  | 4.75  | 4.69  |
| TC0401166 | PPA2          | 27068  | pyrophosphatase (inorganic) 2 ///         | 1.20E-11 | 1 | 3.60 | 4.51  | 4.66  | 4.55  | 4.56  | 4.48  | 4.36  | 4.16  |
| TC0300061 | PPARG         | 5468   | peroxisome proliferator-activated rece    | 4.92E-07 | 1 | 3.40 | 3.59  | 3.68  | 3.76  | 3.66  | 3.55  | 3.48  | 3.49  |
| TC0100446 | PPCS          | 79717  | phosphopantothenoylcysteine synthet       | 7.74E-09 | 1 | 4.68 | 4.84  | 5.06  | 4.93  | 4.87  | 4.90  | 4.92  | 4.92  |
| TC0401362 | PPID          | 5481   | peptidylprolyl isomerase D (cyclophilin   | 2.71E-08 | 1 | 6.75 | 7.01  | 7.54  | 7.23  | 7.04  | 7.13  | 7.24  | 7.21  |
| TC0601673 | PPIL4         | 85313  | peptidylprolyl isomerase (cyclophilin)-li | 2.51E-05 | 1 | 6.35 | 6.61  | 6.73  | 6.55  | 6.42  | 6.63  | 6.68  | 6.74  |
| TC0200211 | PPM1B         | 5495   | protein phosphatase 1B (formerly 2C),     | 0.000201 | 1 | 6.35 | 6.73  | 6.72  | 6.69  | 6.62  | 6.64  | 6.64  | 6.63  |
| TC0300305 | PPM1M         | 132160 | protein phosphatase 1M (PP2C domain       | 1.34E-14 | 1 | 6.56 | 6.83  | 7.38  | 7.31  | 6.98  | 6.71  | 6.59  | 6.47  |
| TC0301876 | PPP1R2        | 5504   | protein phosphatase 1, regulatory (inhi   | 6.04E-07 | 1 | 6.81 | 7.39  | 7.24  | 7.07  | 7.02  | 7.14  | 7.11  | 7.21  |
| TC0800724 | PPP1R3B       | 79660  | protein phosphatase 1, regulatory (inhi   | 6.27E-06 | 1 | 7.15 | 7.69  | 7.59  | 7.59  | 7.48  | 7.61  | 7.37  | 7.35  |
| TC2000875 | PPP1R3D       | 5509   | protein phosphatase 1, regulatory (inhi   | 1.58E-19 | 1 | 5.59 | 6.63  | 6.76  | 6.53  | 6.37  | 6.27  | 6.16  | 6.12  |
| TC0501288 | PPP2CA        | 5515   | protein phosphatase 2 (formerly 2A), c    | 5.48E-06 | 1 | 7.49 | 7.89  | 7.92  | 7.94  | 7.78  | 7.81  | 7.78  | 7.87  |
| TC0400802 | PPP2R2C       | 5522   | protein phosphatase 2 (formerly 2A), r    | 0.000433 | 1 | 4.14 | 4.25  | 4.27  | 4.19  | 4.25  | 4.22  | 4.12  | 4.14  |
| TC1100524 | PPP2R5B       | 5526   | protein phosphatase 2, regulatory subu    | 1.39E-06 | 1 | 4.97 | 5.35  | 5.09  | 5.00  | 5.06  | 4.99  | 5.01  | 5.07  |
| TC1400907 | PPP2R5E       | 5529   | protein phosphatase 2, regulatory subu    | 4.43E-06 | 1 | 4.81 | 5.44  | 5.45  | 5.43  | 5.37  | 5.38  | 5.47  | 5.36  |
| TC1001070 | PPP3CB        | 5532   | protein phosphatase 3 (formerly 2B), c    | 4.82E-15 | 1 | 6.04 | 6.98  | 7.25  | 7.00  | 6.78  | 6.78  | 6.84  | 6.62  |
| TC0300372 | PPP4R2        | 151987 | protein phosphatase 4, regulatory subu    | 1.90E-25 | 1 | 7.01 | 8.56  | 8.47  | 8.46  | 8.40  | 8.22  | 7.98  | 7.84  |
| TC0901331 | PPP6C         | 5537   | protein phosphatase 6, catalytic subun    | 6.15E-10 | 1 | 6.62 | 7.18  | 7.23  | 7.10  | 7.02  | 7.11  | 7.06  | 7.09  |
| TC1101704 | PRCP          | 5547   | prolylcarboxypeptidase (angiotensinas     | 3.45E-09 | 1 | 6.60 | 6.90  | 7.24  | 7.24  | 7.09  | 7.04  | 6.93  | 6.89  |
| TC0401224 | PRDM5         | 11107  | PR domain containing 5                    | 4.68E-08 | 1 | 4.94 | 5.65  | 5.92  | 5.72  | 5.36  | 5.29  | 5.23  | 5.26  |
| TC0102213 | PRDX1         | 5052   | peroxiredoxin 1 /// Peroxiredoxin-1 (EC   | 1.35E-07 | 1 | 5.23 | 5.96  | 6.08  | 6.28  | 6.00  | 5.79  | 5.94  | 5.87  |
| TC1001311 | PRDX3         | 10935  | peroxiredoxin 3                           | 1.43E-08 | 1 | 6.62 | 7.11  | 7.45  | 7.44  | 7.27  | 7.10  | 7.12  | 7.07  |



|           |               |        |                                           |          |   |      |       |       |      |      |      |      |      |
|-----------|---------------|--------|-------------------------------------------|----------|---|------|-------|-------|------|------|------|------|------|
| TC0101293 | PRDX6         | 9588   | peroxiredoxin 6                           | 3.52E-14 | 1 | 6.58 | 7.64  | 7.83  | 7.65 | 7.71 | 7.61 | 7.41 | 7.35 |
| TC1101411 | PRG2          | 5553   | proteoglycan 2, bone marrow (natural      | 0.000271 | 1 | 3.06 | 3.71  | 3.37  | 3.42 | 3.48 | 3.35 | 3.32 | 3.19 |
| TC0500939 | PRKAA1        | 5562   | protein kinase, AMP-activated, alpha 1    | 1.56E-07 | 1 | 6.90 | 7.25  | 7.36  | 7.50 | 7.52 | 7.34 | 7.21 | 7.10 |
| TC1200745 | PRKAB1        | 5564   | protein kinase, AMP-activated, beta 1 r   | 0.000536 | 1 | 5.36 | 5.77  | 5.53  | 5.50 | 5.39 | 5.50 | 5.42 | 5.47 |
| TC1201163 | PRKAG1        | 5571   | protein kinase, AMP-activated, gamma      | 6.76E-07 | 1 | 5.96 | 6.46  | 6.53  | 6.44 | 6.42 | 6.40 | 6.40 | 6.40 |
| TC0301190 | PRKAR2A       | 5576   | protein kinase, cAMP-dependent, regu      | 2.64E-24 | 1 | 5.32 | 6.87  | 6.99  | 6.77 | 6.61 | 6.16 | 6.19 | 5.95 |
| TC1700697 | PRKCA         | 5578   | protein kinase C, alpha                   | 0.000888 | 1 | 3.84 | 4.11  | 4.34  | 4.43 | 4.39 | 4.13 | 4.09 | 3.99 |
| TC0300783 | PRKCI         | 5584   | protein kinase C, iota /// Protein kinase | 6.49E-10 | 1 | 3.66 | 4.66  | 4.61  | 4.68 | 4.68 | 4.55 | 4.49 | 4.31 |
| TC0201434 | PRKD3         | 23683  | protein kinase D3                         | 3.59E-08 | 1 | 4.19 | 4.97  | 4.69  | 4.82 | 4.79 | 4.71 | 4.69 | 4.60 |
| TC0600994 | PRL           | 5617   | prolactin                                 | 0.000139 | 1 | 2.71 | 2.73  | 2.87  | 2.93 | 2.79 | 2.73 | 2.76 | 2.64 |
| TC2100205 | PRMT2         | 3275   | protein arginine methyltransferase 2 //   | 6.03E-13 | 1 | 6.69 | 7.29  | 7.36  | 7.30 | 7.25 | 7.10 | 7.12 | 6.94 |
| TC1400708 | PRMT5         | 10419  | protein arginine methyltransferase 5 //   | 0.000559 | 1 | 5.41 | 5.51  | 5.92  | 6.00 | 5.78 | 5.78 | 5.78 | 5.51 |
| TC2000052 | PRNP          | 5621   | prion protein (p27-30) (Creutzfeldt-Jak   | 2.94E-12 | 1 | 5.89 | 6.59  | 6.59  | 6.55 | 6.68 | 6.59 | 6.42 | 6.39 |
| TC0301341 | PROK2         | 60675  | prokineticin 2 /// Prokineticin-2 precur  | 7.00E-18 | 1 | 9.15 | 10.25 | 10.37 | 9.97 | 9.89 | 9.93 | 9.69 | 9.73 |
| TC0800221 | PROSC         | 11212  | proline synthetase co-transcribed hom     | 1.04E-07 | 1 | 5.07 | 5.36  | 5.74  | 5.63 | 5.52 | 5.52 | 5.54 | 5.45 |
| TC0100553 | PRPF38A       | 84950  | PRP38 pre-mRNA processing factor 38       | 2.41E-05 | 1 | 5.65 | 6.33  | 6.29  | 6.13 | 6.11 | 6.16 | 6.13 | 6.10 |
| TC0901056 | PRUNE2 /// BM | 158471 | prune homolog 2 (Drosophila) /// BNIP     | 0.000182 | 1 | 2.92 | 3.68  | 3.59  | 3.37 | 3.40 | 3.29 | 3.18 | 3.17 |
| TC0700995 | PSCD3         | 9265   | pleckstrin homology, Sec7 and coiled-c    | 3.33E-06 | 1 | 3.95 | 4.18  | 4.14  | 4.14 | 4.05 | 4.04 | 3.97 | 3.95 |
| TC1101221 | PSMA1         | 5682   | proteasome (prosome, macropain) sub       | 1.41E-07 | 1 | 4.88 | 5.28  | 5.46  | 5.30 | 5.26 | 5.08 | 5.11 | 5.01 |
| TC1400169 | PSMA6         | 5687   | proteasome (prosome, macropain) sub       | 1.59E-17 | 1 | 6.87 | 8.30  | 8.37  | 8.19 | 8.04 | 7.95 | 7.97 | 7.95 |
| TC1700052 | PSMB6         | 5694   | proteasome (prosome, macropain) sub       | 0.000122 | 1 | 5.61 | 6.36  | 6.38  | 6.35 | 6.25 | 6.17 | 6.09 | 6.05 |
| TC0700590 | PSMC2         | 5701   | proteasome (prosome, macropain) 26S       | 3.46E-10 | 1 | 4.79 | 5.74  | 5.95  | 5.71 | 5.72 | 5.67 | 5.64 | 5.56 |
| TC1101350 | PSMC3         | 5702   | proteasome (prosome, macropain) 26S       | 1.14E-05 | 1 | 5.42 | 6.24  | 6.17  | 6.11 | 6.20 | 6.19 | 6.16 | 6.03 |
| TC1400232 | PSMC6         | 5706   | proteasome (prosome, macropain) 26S       | 1.63E-08 | 1 | 5.82 | 6.25  | 6.44  | 6.22 | 5.99 | 6.10 | 6.04 | 5.98 |
| TC0201169 | PSMD1         | 5707   | proteasome (prosome, macropain) 26S       | 5.16E-11 | 1 | 5.57 | 6.40  | 6.78  | 6.52 | 6.33 | 6.20 | 6.31 | 6.08 |
| TC0X01145 | PSMD10        | 5716   | proteasome (prosome, macropain) 26S       | 3.27E-09 | 1 | 5.43 | 6.23  | 6.51  | 6.27 | 6.03 | 6.05 | 6.03 | 6.13 |
| TC1700354 | PSMD11        | 5717   | proteasome (prosome, macropain) 26S       | 0.000679 | 1 | 5.01 | 5.39  | 5.43  | 5.28 | 5.28 | 5.24 | 5.30 | 5.23 |
| TC1701634 | PSMD12        | 5718   | proteasome (prosome, macropain) 26S       | 1.32E-06 | 1 | 6.39 | 7.09  | 7.05  | 6.95 | 6.87 | 6.83 | 6.90 | 6.80 |
| TC0300856 | PSMD2         | 5708   | proteasome (prosome, macropain) 26S       | 2.22E-06 | 1 | 6.09 | 6.57  | 6.63  | 6.50 | 6.43 | 6.39 | 6.45 | 6.37 |
| TC0901296 | PSMD5         | 5711   | proteasome (prosome, macropain) 26S       | 0.000498 | 1 | 3.52 | 3.87  | 3.92  | 3.87 | 3.77 | 3.68 | 3.76 | 3.74 |
| TC0301315 | PSMD6         | 9861   | proteasome (prosome, macropain) 26S       | 2.22E-08 | 1 | 6.86 | 7.20  | 7.37  | 7.28 | 7.13 | 7.11 | 7.17 | 7.09 |
| TC1600590 | PSMD7         | 5713   | proteasome (prosome, macropain) 26S       | 0.000373 | 1 | 7.71 | 8.11  | 8.25  | 8.08 | 7.98 | 8.05 | 8.09 | 7.93 |
| TC1200771 | PSMD9         | 5715   | proteasome (prosome, macropain) 26S       | 1.63E-16 | 1 | 5.20 | 5.87  | 6.04  | 5.87 | 5.83 | 5.73 | 5.68 | 5.60 |
| TC1800438 | PSTPIP2       | 9050   | proline-serine-threonine phosphatase i    | 1.21E-13 | 1 | 6.52 | 8.57  | 8.65  | 8.31 | 8.19 | 7.88 | 7.74 | 7.74 |

|           |                |       |                                          |          |   |      |       |       |       |       |      |      |      |
|-----------|----------------|-------|------------------------------------------|----------|---|------|-------|-------|-------|-------|------|------|------|
| TC0100755 | PTBP2          | 58155 | polypyrimidine tract binding protein 2 , | 1.20E-06 | 1 | 3.71 | 4.27  | 4.25  | 4.20  | 4.28  | 4.19 | 4.18 | 3.94 |
| TC1400230 | PTGER2         | 5732  | prostaglandin E receptor 2 (subtype EP   | 8.34E-14 | 1 | 4.27 | 4.82  | 5.17  | 5.48  | 5.31  | 4.99 | 4.95 | 4.64 |
| TC0901382 | PTGES          | 9536  | prostaglandin E synthase                 | 4.04E-05 | 1 | 5.27 | 5.58  | 5.50  | 5.27  | 5.37  | 5.41 | 5.22 | 5.27 |
| TC0901247 | PTGR1 /// LTB4 | 22949 | prostaglandin reductase 1 /// NADP-de    | 9.46E-08 | 1 | 3.35 | 3.62  | 3.87  | 3.98  | 3.96  | 3.81 | 3.65 | 3.52 |
| TC0600484 | PTP4A1         | 7803  | protein tyrosine phosphatase type IVA,   | 4.55E-14 | 1 | 6.46 | 7.53  | 7.26  | 6.97  | 6.90  | 7.16 | 7.05 | 7.15 |
| TC2000369 | PTPN1          | 5770  | protein tyrosine phosphatase, non-recc   | 9.42E-11 | 1 | 6.72 | 7.71  | 7.68  | 7.71  | 7.45  | 7.30 | 7.36 | 7.25 |
| TC0102558 | PTPN22         | 26191 | protein tyrosine phosphatase, non-recc   | 8.57E-20 | 1 | 5.43 | 7.06  | 7.05  | 6.81  | 6.88  | 6.75 | 6.58 | 6.49 |
| TC1501115 | PTPN9          | 5780  | protein tyrosine phosphatase, non-recc   | 0.000466 | 1 | 4.07 | 4.48  | 4.53  | 4.49  | 4.45  | 4.40 | 4.41 | 4.30 |
| TC1101949 | PUS3           | 83480 | pseudouridylate synthase 3               | 5.75E-16 | 1 | 4.51 | 5.97  | 6.16  | 5.86  | 5.56  | 5.57 | 5.54 | 5.41 |
| TC0300337 | PXK            | 54899 | PX domain containing serine/threonine    | 1.42E-25 | 1 | 6.28 | 7.54  | 7.82  | 7.79  | 7.74  | 7.42 | 7.29 | 7.15 |
| TC0801047 | PXMP3          | 5828  | peroxisomal membrane protein 3, 35kD     | 6.85E-17 | 1 | 4.59 | 5.55  | 5.78  | 5.43  | 5.17  | 5.23 | 5.22 | 5.26 |
| TC1400850 | PYGL           | 5836  | phosphorylase, glycogen; liver (Hers die | 6.90E-23 | 1 | 9.22 | 10.20 | 10.30 | 10.27 | 10.15 | 9.91 | 9.79 | 9.63 |
| TC1200188 | PYROXD1        | 79912 | pyridine nucleotide-disulphide oxidore   | 2.75E-07 | 1 | 4.56 | 5.35  | 5.37  | 5.17  | 5.12  | 5.01 | 5.07 | 5.00 |
| TC1800354 | Q14179_HUM/--- |       | H.sapiens NF1 gene homologue (2) clon    | 3.71E-09 | 1 | 3.50 | 4.57  | 4.15  | 3.83  | 3.76  | 3.66 | 3.74 | 3.48 |
| TC2100010 | Q14179_HUM/--- |       | H.sapiens NF1 gene homologue (2) clon    | 2.07E-08 | 1 | 3.01 | 3.92  | 3.59  | 3.39  | 3.34  | 3.15 | 3.02 | 3.06 |
| TC0X01082 | Q14236_HUM/--- |       | Early lymphoid activation protein (Frag  | 1.11E-07 | 1 | 4.03 | 5.49  | 5.56  | 5.75  | 5.71  | 5.57 | 5.50 | 5.36 |
| TC1700899 | Q3C259_HUM/--- |       | Succinate dehydrogenase complex, sub     | 2.89E-11 | 1 | 3.81 | 5.68  | 6.01  | 5.87  | 5.56  | 5.28 | 5.01 | 4.91 |
| TC2000120 | Q4VXU4_HUM/--- |       | OTTHUMP00000030388 (Fragment). [S        | 0.000507 | 1 | 5.01 | 5.69  | 5.68  | 5.38  | 5.35  | 4.93 | 5.28 | 4.92 |
| TC1300129 | Q5W0Q5_HUM/--- |       | OTTHUMP00000018371. [Source:Unipr        | 6.00E-15 | 1 | 5.86 | 7.09  | 7.06  | 7.02  | 7.04  | 7.01 | 6.91 | 6.85 |
| TC0801119 | Q629K1_HUM/--- |       | ---                                      | 2.70E-25 | 1 | 4.55 | 6.40  | 6.36  | 6.10  | 6.23  | 6.10 | 5.83 | 5.62 |
| TC0202408 | Q6NSB1_HUM/--- |       | SRP9 protein (Fragment). [Source:Unip    | 1.56E-13 | 1 | 3.79 | 4.64  | 4.77  | 4.71  | 4.63  | 4.53 | 4.47 | 4.29 |
| TC1900637 | Q6P662_HUM/--- |       | ---                                      | 5.44E-16 | 1 | 4.06 | 4.39  | 4.93  | 5.36  | 5.08  | 4.30 | 4.27 | 4.20 |
| TC0301140 | Q6ZMS4_HUM/--- |       | CDNA FLJ16720 fis, clone UTERU30010!     | 2.64E-08 | 1 | 4.70 | 5.39  | 4.98  | 4.92  | 4.83  | 4.79 | 4.78 | 4.67 |
| TC0700770 | Q6ZN80_HUM/--- |       | CDNA FLJ16351 fis, clone TESTI203906C    | 3.76E-08 | 1 | 5.61 | 5.20  | 6.00  | 6.16  | 6.04  | 5.47 | 5.32 | 5.07 |
| TC0501044 | Q6ZNT7_HUM/--- |       | CDNA FLJ27195 fis, clone SYN02786. [S    | 5.33E-07 | 1 | 6.32 | 6.95  | 7.78  | 7.22  | 6.98  | 6.69 | 6.81 | 6.31 |
| TC0103006 | Q6ZNX2_HUM/--- |       | CDNA FLJ26950 fis, clone RCT08544. [S    | 1.08E-06 | 1 | 4.54 | 4.87  | 4.92  | 4.78  | 4.57  | 4.67 | 4.40 | 4.39 |
| TC2000793 | Q6ZWG0_HUM/--- |       | CDNA FLJ41161 fis, clone BRACE203947     | 2.14E-06 | 1 | 4.12 | 4.56  | 4.47  | 4.36  | 4.37  | 4.36 | 4.13 | 4.10 |
| TC0401429 | Q8N0S5_HUM/--- |       | MGC45800 protein. [Source:Uniprot/Sf     | 3.03E-05 | 1 | 3.53 | 3.74  | 3.81  | 3.71  | 3.76  | 3.73 | 3.68 | 3.62 |
| TC0400366 | Q8N507_HUM/--- |       | Putative uncharacterized protein C4orf   | 2.56E-05 | 1 | 3.43 | 3.76  | 3.75  | 3.61  | 3.77  | 3.74 | 3.61 | 3.59 |
| TC1900584 | Q8N6Q3-3 ---   |       | CD177_HUMAN Isoform 3 of Q8N6Q3 -        | 5.64E-27 | 1 | 4.53 | 9.21  | 9.57  | 9.28  | 9.10  | 7.51 | 7.03 | 6.07 |
| TC1100174 | Q8N6V7_HUM/--- |       | ---                                      | 1.32E-08 | 1 | 7.24 | 7.60  | 8.54  | 7.80  | 7.49  | 7.76 | 7.37 | 7.51 |
| TC0201823 | Q96C48_HUM/--- |       | LOC541471 protein (Hypothetical prote    | 0.00015  | 1 | 5.74 | 6.07  | 6.23  | 6.16  | 5.95  | 6.08 | 6.14 | 6.02 |
| TC0102969 | Q96IX9_HUMA--- |       | MGC12538 protein (Novel protein). [So    | 1.08E-08 | 1 | 6.02 | 7.25  | 7.18  | 6.78  | 6.51  | 6.62 | 6.58 | 6.44 |
| TC0800326 | Q96QE0_HUM/--- |       | ---                                      | 6.99E-05 | 1 | 4.73 | 5.09  | 5.09  | 5.15  | 5.14  | 5.10 | 5.11 | 5.07 |

|           |                |        |                                          |          |   |      |      |      |      |      |      |      |      |
|-----------|----------------|--------|------------------------------------------|----------|---|------|------|------|------|------|------|------|------|
| TC1400858 | Q9H373_HUM     | ---    | ---                                      | 2.37E-10 | 1 | 7.28 | 8.44 | 8.48 | 8.19 | 8.12 | 8.20 | 7.93 | 8.15 |
| TC0X00373 | Q9H375_HUM     | ---    | ---                                      | 1.40E-06 | 1 | 7.38 | 8.46 | 8.39 | 8.14 | 7.93 | 8.06 | 8.32 | 8.31 |
| TC2100210 | Q9NSJ1_HUM     | ---    | ---                                      | 7.84E-05 | 1 | 2.13 | 2.38 | 2.43 | 2.40 | 2.37 | 2.37 | 2.42 | 2.45 |
| TC0301543 | Q9P156_HUM     | ---    | ---                                      | 8.64E-06 | 1 | 8.91 | 9.08 | 9.43 | 9.27 | 9.26 | 9.31 | 9.24 | 9.28 |
| TC0500373 | Q9P181_HUM     | ---    | ---                                      | 2.80E-15 | 1 | 5.71 | 7.66 | 7.85 | 7.56 | 7.54 | 7.33 | 7.17 | 7.17 |
| TC1501256 | Q9P1I3_HUM     | ---    | ---                                      | 4.01E-08 | 1 | 6.06 | 6.94 | 6.74 | 6.23 | 6.22 | 6.07 | 5.94 | 5.72 |
| TC0400323 | Q9UHS6_HUM     | ---    | ---                                      | 2.34E-15 | 1 | 5.84 | 7.76 | 7.87 | 7.61 | 7.28 | 7.29 | 7.14 | 6.94 |
| TC0200181 | QPCT           | 25797  | glutaminyl-peptide cyclotransferase (glu | 7.54E-07 | 1 | 8.11 | 8.92 | 8.93 | 8.97 | 8.99 | 8.94 | 8.65 | 8.68 |
| TC0101325 | QSOX1          | 5768   | quiescin Q6 sulfhydryl oxidase 1         | 2.33E-18 | 1 | 4.92 | 6.01 | 5.84 | 5.71 | 5.70 | 5.41 | 5.26 | 5.13 |
| TC0800152 | R3HCC1         | 203069 | R3H domain and coiled-coil containing    | 7.26E-05 | 1 | 5.63 | 5.98 | 5.89 | 5.97 | 5.97 | 5.94 | 5.93 | 5.91 |
| TC0200105 | RAB10          | 10890  | RAB10, member RAS oncogene family        | 5.82E-21 | 1 | 7.37 | 8.01 | 8.26 | 8.23 | 8.22 | 8.14 | 8.02 | 7.97 |
| TC1500417 | RAB11A         | 8766   | RAB11A, member RAS oncogene family       | 1.97E-05 | 1 | 8.31 | 8.74 | 8.88 | 8.91 | 8.77 | 8.87 | 8.83 | 8.88 |
| TC1000134 | RAB18          | 22931  | RAB18, member RAS oncogene family /      | 0.000691 | 1 | 7.94 | 7.97 | 8.26 | 8.14 | 7.99 | 8.03 | 7.93 | 8.09 |
| TC0700746 | RAB19          | 401409 | RAB19, member RAS oncogene family /      | 1.13E-08 | 1 | 3.54 | 4.13 | 3.80 | 3.74 | 4.02 | 3.81 | 3.65 | 3.57 |
| TC1300653 | RAB20          | 55647  | RAB20, member RAS oncogene family        | 3.00E-08 | 1 | 5.71 | 6.55 | 6.35 | 6.43 | 6.35 | 6.40 | 6.26 | 6.11 |
| TC1200521 | RAB21          | 23011  | RAB21, member RAS oncogene family        | 3.78E-09 | 1 | 7.53 | 8.37 | 8.17 | 8.19 | 8.13 | 8.25 | 8.14 | 8.18 |
| TC1500971 | RAB27A         | 5873   | RAB27A, member RAS oncogene family       | 7.44E-19 | 1 | 7.41 | 8.35 | 8.29 | 8.26 | 8.22 | 8.02 | 7.88 | 7.81 |
| TC0400823 | RAB28          | 9364   | RAB28, member RAS oncogene family /      | 0.000653 | 1 | 4.85 | 5.32 | 5.31 | 5.12 | 5.13 | 5.13 | 5.11 | 5.17 |
| TC0800328 | RAB2A          | 5862   | RAB2A, member RAS oncogene family        | 1.93E-05 | 1 | 7.71 | 8.02 | 8.17 | 8.19 | 8.05 | 8.07 | 8.03 | 8.06 |
| TC1800047 | RAB31          | 11031  | RAB31, member RAS oncogene family        | 1.04E-22 | 1 | 8.59 | 9.49 | 9.55 | 9.59 | 9.51 | 9.38 | 9.23 | 9.15 |
| TC0600786 | RAB32          | 10981  | RAB32, member RAS oncogene family        | 4.02E-34 | 1 | 5.75 | 7.58 | 7.80 | 7.56 | 7.44 | 7.23 | 7.06 | 6.85 |
| TC0X00561 | RAB33A         | 9363   | RAB33A, member RAS oncogene family       | 1.51E-05 | 1 | 4.21 | 4.73 | 4.85 | 4.80 | 4.84 | 4.74 | 4.79 | 4.73 |
| TC0400554 | RAB33B         | 83452  | RAB33B, member RAS oncogene family       | 3.22E-12 | 1 | 6.15 | 7.29 | 7.50 | 7.33 | 7.24 | 7.43 | 7.24 | 7.30 |
| TC1901296 | RAB3A          | 5864   | RAB3A, member RAS oncogene family        | 4.68E-05 | 1 | 4.10 | 4.39 | 4.56 | 4.53 | 4.53 | 4.40 | 4.28 | 4.31 |
| TC0200736 | RAB3GAP1       | 22930  | RAB3 GTPase activating protein subunit   | 4.71E-10 | 1 | 4.77 | 5.55 | 5.51 | 5.23 | 5.09 | 5.13 | 5.23 | 5.11 |
| TC0103244 | RAB3GAP2       | 25782  | RAB3 GTPase activating protein subunit   | 1.06E-11 | 1 | 5.53 | 6.40 | 6.41 | 6.28 | 6.12 | 6.06 | 6.06 | 5.96 |
| TC1200511 | RAB3IP         | 117177 | RAB3A interacting protein (rabin3) /// I | 2.00E-08 | 1 | 4.54 | 5.37 | 5.27 | 5.30 | 5.48 | 5.31 | 5.30 | 5.03 |
| TC0301546 | RAB43 /// ISY1 | 339122 | // RAB43, member RAS oncogene family /   | 1.37E-11 | 1 | 6.58 | 7.11 | 7.10 | 7.13 | 7.02 | 7.03 | 7.02 | 7.00 |
| TC0300099 | RAB5A          | 5868   | RAB5A, member RAS oncogene family        | 0.000548 | 1 | 7.54 | 7.95 | 7.79 | 7.72 | 7.55 | 7.65 | 7.65 | 7.65 |
| TC0200676 | RAB6C /// NM_  | 84084  | RAB6C, member RAS oncogene family /      | 4.71E-05 | 1 | 3.65 | 4.12 | 4.27 | 4.11 | 4.09 | 4.06 | 4.13 | 4.04 |
| TC1101648 | RAB6C /// RAB  | 84084  | /// RAB6C, member RAS oncogene family /  | 1.10E-16 | 1 | 6.44 | 7.12 | 7.30 | 7.19 | 7.15 | 7.07 | 7.05 | 6.95 |
| TC0103170 | RAB7L1         | 8934   | RAB7, member RAS oncogene family-lit     | 1.95E-15 | 1 | 5.03 | 6.13 | 6.28 | 5.94 | 5.64 | 5.66 | 5.71 | 5.67 |
| TC1500396 | RAB8B          | 51762  | RAB8B, member RAS oncogene family        | 9.97E-06 | 1 | 8.49 | 8.89 | 8.92 | 8.98 | 8.86 | 8.89 | 8.75 | 8.80 |
| TC1901542 | RABAC1         | 10567  | Rab acceptor 1 (prenylated)              | 3.86E-18 | 1 | 6.79 | 7.62 | 7.73 | 7.90 | 7.71 | 7.49 | 7.48 | 7.38 |

|           |                          |                                                      |          |   |      |      |      |      |      |      |      |      |
|-----------|--------------------------|------------------------------------------------------|----------|---|------|------|------|------|------|------|------|------|
| TC0103132 | RABIF                    | 5877 RAB interacting factor                          | 1.53E-07 | 1 | 6.20 | 6.61 | 6.83 | 6.85 | 6.81 | 6.76 | 6.73 | 6.65 |
| TC0900472 | RAD23B                   | 5887 RAD23 homolog B ( <i>S. cerevisiae</i> ) /// UV | 3.74E-18 | 1 | 7.34 | 8.13 | 8.22 | 8.29 | 8.15 | 8.03 | 7.85 | 7.78 |
| TC1400318 | RAD51L1                  | 5890 RAD51-like 1 ( <i>S. cerevisiae</i> )           | 0.000154 | 1 | 3.81 | 4.13 | 4.28 | 4.19 | 4.23 | 4.14 | 4.16 | 3.97 |
| TC2000404 | RAE1                     | 8480 RAE1 RNA export 1 homolog ( <i>S. pombe</i> )   | 0.000114 | 1 | 4.71 | 4.90 | 4.99 | 4.92 | 4.94 | 4.92 | 5.00 | 4.90 |
| TC0200642 | RALB                     | 5899 v-ral simian leukemia viral oncogene hc         | 7.77E-05 | 1 | 8.16 | 8.65 | 8.68 | 8.72 | 8.56 | 8.51 | 8.44 | 8.44 |
| TC0101313 | RALGPS2                  | 55103 Ral GEF with PH domain and SH3 bindir          | 3.07E-11 | 1 | 5.28 | 6.12 | 6.02 | 5.58 | 5.45 | 5.63 | 5.67 | 5.61 |
| TC0200565 | RANBP2                   | 5903 RAN binding protein 2                           | 4.48E-05 | 1 | 5.99 | 6.81 | 6.56 | 6.46 | 6.31 | 6.25 | 6.42 | 6.22 |
| TC0600960 | RANBP9                   | 10048 RAN binding protein 9 /// Ran-binding          | 6.93E-25 | 1 | 7.09 | 8.04 | 8.23 | 8.12 | 8.00 | 7.93 | 7.85 | 7.75 |
| TC1200499 | RAP1B                    | 5908 RAP1B, member of RAS oncogene fami              | 3.66E-08 | 1 | 7.51 | 8.05 | 8.10 | 8.05 | 8.12 | 8.07 | 8.00 | 7.94 |
| TC0300725 | RAP2B                    | 5912 RAP2B, member of RAS oncogene fami              | 1.13E-16 | 1 | 4.63 | 5.20 | 5.57 | 5.60 | 5.61 | 5.47 | 5.42 | 5.31 |
| TC0X01245 | RAP2C                    | 57826 RAP2C, member of RAS oncogene fami             | 1.80E-06 | 1 | 7.01 | 7.44 | 7.43 | 7.39 | 7.40 | 7.43 | 7.25 | 7.30 |
| TC0300672 | RASA2                    | 5922 RAS p21 protein activator 2                     | 6.54E-24 | 1 | 6.16 | 7.77 | 7.39 | 7.05 | 6.95 | 6.91 | 6.76 | 6.66 |
| TC0401076 | RASGEF1B                 | 153020 RasGEF domain family, member 1B               | 0.000129 | 1 | 2.77 | 2.97 | 3.24 | 3.20 | 3.03 | 2.80 | 2.83 | 2.83 |
| TC1300133 | RB1                      | 5925 retinoblastoma 1 (including osteosarco          | 9.46E-16 | 1 | 5.80 | 6.79 | 6.78 | 6.58 | 6.44 | 6.41 | 6.38 | 6.30 |
| TC0201360 | RBJ                      | 51277 rab and DnaJ domain containing /// rat         | 0.000337 | 1 | 3.54 | 3.82 | 3.81 | 3.72 | 3.68 | 3.67 | 3.70 | 3.59 |
| TC0201399 | RBKS                     | 64080 ribokinase                                     | 6.98E-06 | 1 | 3.59 | 4.29 | 3.98 | 3.90 | 3.97 | 3.86 | 3.80 | 3.80 |
| TC1600437 | RBL2                     | 5934 retinoblastoma-like 2 (p130) /// Retino         | 0.000352 | 1 | 7.87 | 8.06 | 8.05 | 8.00 | 7.84 | 7.86 | 7.84 | 7.82 |
| TC2100014 | RBM11                    | 54033 RNA binding motif protein 11                   | 9.74E-05 | 1 | 2.53 | 3.29 | 3.22 | 3.13 | 3.38 | 3.15 | 3.11 | 2.98 |
| TC1000035 | RBM17                    | 84991 RNA binding motif protein 17                   | 1.87E-05 | 1 | 4.84 | 5.46 | 5.35 | 5.32 | 5.39 | 5.28 | 5.31 | 5.15 |
| TC2000405 | RBM38                    | 55544 RNA binding motif protein 38 /// RNA-t         | 3.82E-05 | 1 | 5.31 | 5.72 | 5.62 | 5.71 | 5.78 | 5.58 | 5.49 | 5.42 |
| TC0X01139 | RBM41                    | 55285 RNA binding motif protein 41 /// RNA-t         | 4.26E-06 | 1 | 3.97 | 4.50 | 4.25 | 4.06 | 4.11 | 4.11 | 4.30 | 4.17 |
| TC1900448 | RBM42                    | 79171 RNA binding motif protein 42 /// RNA t         | 0.000131 | 1 | 5.48 | 5.82 | 5.76 | 5.76 | 5.70 | 5.78 | 5.74 | 5.75 |
| TC1100865 | RBM7                     | 10179 RNA binding motif protein 7 /// RNA-bi         | 0.000539 | 1 | 6.33 | 7.04 | 7.04 | 6.91 | 6.71 | 6.99 | 6.92 | 6.94 |
| TC0202044 | RBMS1                    | 5937 RNA binding motif, single stranded inte         | 2.75E-15 | 1 | 7.89 | 8.48 | 8.54 | 8.39 | 8.23 | 8.17 | 8.11 | 8.04 |
| TC0400143 | RBPJ                     | 3516 recombination signal binding protein fc         | 8.38E-13 | 1 | 8.15 | 8.70 | 8.76 | 8.54 | 8.43 | 8.49 | 8.37 | 8.29 |
| TC2000311 | RBPJL                    | 11317 recombination signal binding protein fc        | 0.000368 | 1 | 4.15 | 4.25 | 4.29 | 4.20 | 4.24 | 4.17 | 4.11 | 4.18 |
| TC2200309 | RBX1                     | 9978 ring-box 1                                      | 1.10E-11 | 1 | 6.44 | 7.30 | 7.46 | 7.52 | 7.57 | 7.44 | 7.36 | 7.21 |
| TC2100323 | RCAN1                    | 1827 regulator of calcineurin 1                      | 2.47E-06 | 1 | 4.45 | 4.73 | 4.79 | 4.77 | 4.76 | 4.64 | 4.72 | 4.60 |
| TC0401046 | RCHY1                    | 25898 ring finger and CHY zinc finger domain         | 8.26E-22 | 1 | 5.07 | 6.70 | 6.74 | 6.51 | 6.35 | 6.21 | 5.94 | 5.80 |
| TC0900023 | RCL1                     | 10171 RNA terminal phosphate cyclase-like 1          | 6.49E-09 | 1 | 3.39 | 3.80 | 3.71 | 3.75 | 3.80 | 3.75 | 3.71 | 3.57 |
| TC1200410 | RDH5 /// BLOC 5959 /// 2 | retinol dehydrogenase 5 (11-cis/9-cis) /             | 3.68E-09 | 1 | 5.50 | 5.87 | 5.99 | 6.09 | 6.05 | 5.88 | 5.78 | 5.71 |
| TC0801341 | RECQL4                   | 9401 RecQ protein-like 4                             | 8.72E-05 | 1 | 4.76 | 4.97 | 4.98 | 4.94 | 4.99 | 5.00 | 4.91 | 4.92 |
| TC0501214 | REEP5                    | 7905 receptor accessory protein 5 /// Recept         | 8.92E-10 | 1 | 7.40 | 8.15 | 8.33 | 8.16 | 8.07 | 8.09 | 8.05 | 8.03 |
| TC0200268 | REL                      | 5966 v-rel reticuloendotheliosis viral oncoge        | 9.05E-10 | 1 | 7.86 | 8.22 | 8.25 | 8.03 | 7.87 | 7.95 | 7.93 | 7.95 |

|           |                          |                                          |                                            |          |      |       |       |       |       |       |       |       |       |
|-----------|--------------------------|------------------------------------------|--------------------------------------------|----------|------|-------|-------|-------|-------|-------|-------|-------|-------|
| TC1900134 | RETN                     | 56729                                    | resistin /// Resistin precursor (Cysteine  | 3.35E-16 | 1    | 4.59  | 8.41  | 8.77  | 8.36  | 9.17  | 8.63  | 7.79  | 6.73  |
| TC0201672 | RETSAT                   | 54884                                    | retinol saturase (all-trans-retinol 13,14- | 6.00E-05 | 1    | 4.58  | 4.61  | 4.80  | 4.86  | 4.77  | 4.69  | 4.68  | 4.69  |
| TC0400886 | RFC1                     | 5981                                     | replication factor C (activator 1) 1, 145l | 0.000105 | 1    | 4.56  | 5.46  | 5.09  | 5.08  | 5.05  | 5.00  | 5.31  | 5.04  |
| TC0301265 | RFT1                     | 91869                                    | RFT1 homolog (S. cerevisiae)               | 4.06E-19 | 1    | 4.70  | 5.08  | 5.47  | 5.54  | 5.45  | 5.26  | 5.16  | 5.07  |
| TC0900750 | RFX3                     | 5991                                     | regulatory factor X, 3 (influences HLA c   | 2.64E-12 | 1    | 4.71  | 5.08  | 5.25  | 4.81  | 4.62  | 4.76  | 4.72  | 4.66  |
| TC2200120 | RGL4 /// RGDSI           | 266747                                   | ral guanine nucleotide dissociation stir   | 1.13E-17 | 1    | 6.10  | 6.77  | 6.70  | 6.53  | 6.56  | 6.47  | 6.39  | 6.29  |
| TC0900165 | RGP1                     | 9827                                     | RGP1 retrograde golgi transport homol      | 9.33E-06 | 1    | 5.27  | 5.54  | 5.51  | 5.42  | 5.42  | 5.29  | 5.17  | 5.20  |
| TC2000917 | RGS19                    | 10287                                    | regulator of G-protein signaling 19        | 5.35E-07 | 1    | 6.11  | 6.51  | 6.53  | 6.54  | 6.54  | 6.50  | 6.38  | 6.41  |
| TC0700409 | RHBDD2                   | 57414                                    | rhomboid domain containing 2               | 3.72E-09 | 1    | 5.73  | 6.27  | 6.24  | 6.31  | 6.16  | 5.98  | 5.92  | 5.99  |
| TC0301206 | RHOA                     | 387                                      | ras homolog gene family, member A          | 4.79E-05 | 1    | 10.99 | 11.21 | 11.31 | 11.26 | 11.19 | 11.23 | 11.16 | 11.17 |
| TC1101098 | RHOG                     | 391                                      | ras homolog gene family, member G (rl      | 5.72E-09 | 1    | 8.61  | 9.43  | 9.35  | 9.35  | 9.36  | 9.12  | 8.98  | 9.02  |
| TC1700351 | RHOT1                    | 55288                                    | ras homolog gene family, member T1 /,      | 4.02E-10 | 1    | 6.36  | 6.94  | 7.13  | 7.25  | 7.12  | 7.09  | 7.08  | 7.06  |
| TC0101590 | RHOU                     | 58480                                    | ras homolog gene family, member U          | 5.55E-14 | 1    | 5.41  | 6.21  | 6.20  | 5.88  | 5.73  | 5.64  | 5.66  | 5.57  |
| TC1400452 | RIN3                     | 79890                                    | Ras and Rab interactor 3                   | 3.64E-07 | 1    | 5.91  | 6.51  | 6.44  | 6.56  | 6.44  | 6.24  | 6.19  | 6.09  |
| TC1800105 | RIOK3                    | 8780                                     | RIO kinase 3 (yeast)                       | 6.72E-06 | 1    | 7.70  | 8.01  | 7.78  | 7.89  | 7.92  | 7.81  | 7.67  | 7.47  |
| TC0102839 | RIT1                     | 6016                                     | Ras-like without CAAX 1                    | 0.000512 | 1    | 8.25  | 8.33  | 8.54  | 8.51  | 8.33  | 8.40  | 8.30  | 8.33  |
| TC0500763 | RMND5B                   | 64777                                    | required for meiotic nuclear division 5    | 0.000559 | 1    | 4.92  | 5.10  | 5.07  | 4.96  | 5.00  | 4.96  | 4.96  | 4.97  |
| TC1200754 | RNF10                    | 9921                                     | ring finger protein 10                     | 2.12E-24 | 1    | 6.70  | 7.97  | 8.10  | 7.92  | 7.65  | 7.31  | 7.19  | 6.99  |
| TC0100543 | RNF11                    | 26994                                    | ring finger protein 11                     | 2.92E-10 | 1    | 5.46  | 5.99  | 6.03  | 6.02  | 6.05  | 6.04  | 5.85  | 5.90  |
| TC0X01045 | RNF12                    | 51132                                    | ring finger protein 12                     | 7.84E-20 | 1    | 5.98  | 7.07  | 6.94  | 6.67  | 6.38  | 6.44  | 6.29  | 6.29  |
| TC1700338 | RNF135                   | 84282                                    | ring finger protein 135                    | 0.000274 | 1    | 5.44  | 5.41  | 5.62  | 5.68  | 5.61  | 5.52  | 5.53  | 5.51  |
| TC1800132 | RNF138                   | 51444                                    | ring finger protein 138                    | 1.00E-08 | 1    | 4.99  | 5.80  | 5.89  | 5.93  | 5.86  | 5.90  | 5.76  | 5.84  |
| TC0800544 | RNF139                   | 11236                                    | ring finger protein 139                    | 2.70E-07 | 1    | 5.35  | 5.76  | 5.87  | 5.67  | 5.64  | 5.79  | 5.77  | 5.84  |
| TC0600709 | RNF146                   | 81847                                    | ring finger protein 146                    | 1.15E-10 | 1    | 6.20  | 6.51  | 6.76  | 6.50  | 6.25  | 6.38  | 6.37  | 6.24  |
| TC0800909 | RNF170                   | 81790                                    | ring finger protein 170 /// RING finger p  | 7.71E-14 | 1    | 4.60  | 4.93  | 5.19  | 5.01  | 4.87  | 4.84  | 4.96  | 4.76  |
| TC0101357 | RNF2                     | 6045                                     | ring finger protein 2 /// E3 ubiquitin-pr  | 2.61E-14 | 1    | 5.10  | 5.72  | 6.00  | 5.95  | 5.70  | 5.64  | 5.57  | 5.62  |
| TC0900910 | RNF38                    | 152006                                   | ring finger protein 38 /// RING finger pi  | 0.000395 | 1    | 6.66  | 6.98  | 7.09  | 7.09  | 6.98  | 6.99  | 6.91  | 6.92  |
| TC0300673 | RNF7                     | 9616                                     | ring finger protein 7                      | 8.26E-24 | 1    | 5.30  | 6.43  | 6.88  | 6.71  | 6.58  | 6.38  | 6.44  | 6.32  |
| TC1701573 | RNFT1 /// NP_t           | 51136                                    | ring finger protein, transmembrane 1 /,    | 0.000104 | 1    | 5.91  | 6.19  | 6.48  | 6.16  | 6.18  | 6.21  | 6.24  | 6.10  |
| TC0601444 | RNGTT                    | 8732                                     | RNA guanylyltransferase and 5'-phosph      | 8.49E-07 | 1    | 5.07  | 5.74  | 5.85  | 5.67  | 5.57  | 5.46  | 5.57  | 5.35  |
| TC1600823 | ROGDI                    | 79641                                    | rogdi homolog (Drosophila)                 | 3.25E-11 | 1    | 5.12  | 5.49  | 5.61  | 5.67  | 5.71  | 5.47  | 5.39  | 5.27  |
| TC1100479 | ROM1                     | 6094                                     | retinal outer segment membrane prote       | 4.29E-08 | 1    | 4.69  | 4.99  | 5.19  | 5.07  | 4.91  | 4.71  | 4.79  | 4.74  |
| TC0500050 | ROPN1L                   | 83853                                    | ropporin 1-like                            | 3.71E-11 | 1    | 6.12  | 7.17  | 7.16  | 7.05  | 6.88  | 6.67  | 6.60  | 6.54  |
| TC1000185 | RP1-19N1.1 /// 644504 // | novel protein similar to chondroitin sul | 1.93E-26                                   | 1        | 6.70 | 8.36  | 8.44  | 8.18  | 8.09  | 7.79  | 7.67  | 7.52  |       |

|           |               |        |                                           |          |   |       |       |       |       |       |       |       |       |
|-----------|---------------|--------|-------------------------------------------|----------|---|-------|-------|-------|-------|-------|-------|-------|-------|
| TC0X00177 | RP2           | 6102   | retinitis pigmentosa 2 (X-linked recessiv | 0.000405 | 1 | 8.42  | 8.76  | 8.93  | 8.91  | 8.76  | 8.80  | 8.65  | 8.77  |
| TC0102570 | RP5-1000E10.4 | 80143  | suppressor of IKK epsilon /// suppresso   | 7.99E-09 | 1 | 5.17  | 5.65  | 5.86  | 5.86  | 5.78  | 5.72  | 5.75  | 5.77  |
| TC0100130 | RP5-1077B9.4  | 60672  | invasion inhibitory protein 45            | 4.95E-08 | 1 | 5.02  | 5.39  | 5.37  | 5.37  | 5.39  | 5.36  | 5.32  | 5.29  |
| TC1700482 | RPL27         | 6155   | ribosomal protein L27                     | 3.01E-18 | 1 | 8.84  | 10.06 | 10.03 | 10.13 | 10.24 | 10.03 | 9.89  | 9.72  |
| TC0200528 | RPL31         | 732015 | // ribosomal protein L31                  | 5.55E-13 | 1 | 6.21  | 7.04  | 7.03  | 7.14  | 7.18  | 7.12  | 7.05  | 6.79  |
| TC0X00811 | RPS6KA3       | 6197   | ribosomal protein S6 kinase, 90kDa, po    | 5.01E-10 | 1 | 7.11  | 7.48  | 7.86  | 7.61  | 7.24  | 7.24  | 7.30  | 7.25  |
| TC0900081 | RRAGA         | 10670  | Ras-related GTP binding A                 | 5.93E-10 | 1 | 6.43  | 7.25  | 7.49  | 7.52  | 7.18  | 7.26  | 7.34  | 7.24  |
| TC0X00286 | RRAGB         | 10325  | Ras-related GTP binding B                 | 6.81E-05 | 1 | 3.65  | 4.08  | 4.10  | 4.01  | 3.93  | 3.86  | 4.02  | 3.81  |
| TC2000577 | RRBP1         | 6238   | ribosome binding protein 1 homolog 1      | 4.95E-05 | 1 | 5.64  | 6.07  | 6.01  | 5.92  | 5.81  | 5.73  | 5.82  | 5.76  |
| TC0102559 | RSBN1         | 54665  | round spermatid basic protein 1 /// ro    | 2.87E-33 | 1 | 5.56  | 7.45  | 7.41  | 7.26  | 7.06  | 6.79  | 6.68  | 6.44  |
| TC0300744 | RSRC1         | 51319  | arginine/serine-rich coiled-coil 1 /// Ar | 3.61E-05 | 1 | 5.05  | 5.76  | 5.97  | 5.77  | 5.71  | 5.87  | 5.88  | 5.72  |
| TC0100767 | RTCD1         | 8634   | RNA terminal phosphate cyclase domai      | 6.03E-06 | 1 | 5.70  | 5.84  | 6.22  | 6.04  | 5.92  | 5.91  | 5.97  | 5.82  |
| TC1901597 | RTN2          | 6253   | reticulon 2                               | 1.20E-05 | 1 | 4.16  | 4.37  | 4.35  | 4.42  | 4.42  | 4.29  | 4.15  | 4.24  |
| TC0201520 | RTN4          | 57142  | reticulon 4 /// Reticulon-4 (Neurite out  | 7.92E-18 | 1 | 5.54  | 5.86  | 6.04  | 5.95  | 5.95  | 5.87  | 5.83  | 5.77  |
| TC0300235 | RTP3          | 83597  | receptor (chemosensory) transporter p     | 0.000932 | 1 | 2.94  | 3.40  | 3.29  | 3.16  | 3.40  | 3.27  | 3.24  | 3.34  |
| TC0700454 | RUNDC3B       | 154661 | RUN domain containing 3B /// RUN doi      | 0.000194 | 1 | 2.74  | 2.90  | 2.97  | 2.85  | 2.87  | 2.79  | 2.80  | 2.79  |
| TC2100324 | RUNX1         | 861    | runt-related transcription factor 1 (acu  | 2.59E-12 | 1 | 5.47  | 5.82  | 6.05  | 6.11  | 6.01  | 5.80  | 5.81  | 5.70  |
| TC0600666 | RWDD1         | 51389  | RWD domain containing 1                   | 6.68E-11 | 1 | 4.59  | 5.55  | 5.82  | 5.76  | 5.78  | 5.66  | 5.74  | 5.54  |
| TC0200320 | RY1           | 11017  | putative nucleic acid binding protein R)  | 1.35E-19 | 1 | 5.64  | 7.14  | 7.26  | 6.79  | 6.77  | 6.75  | 6.82  | 6.75  |
| TC0102761 | S100A11       | 730558 | // S100 calcium binding protein A11       | 1.70E-13 | 1 | 10.27 | 10.80 | 10.99 | 11.12 | 10.97 | 10.90 | 10.84 | 10.84 |
| TC0102779 | S100A12       | 6283   | S100 calcium binding protein A12 /// P    | 3.19E-36 | 1 | 10.27 | 11.59 | 11.77 | 11.59 | 11.57 | 11.39 | 11.24 | 11.08 |
| TC0102789 | S100A2        | 6273   | S100 calcium binding protein A2 /// Pr    | 0.000638 | 1 | 5.41  | 5.51  | 5.61  | 5.56  | 5.52  | 5.56  | 5.44  | 5.45  |
| TC0102785 | S100A6        | 6277   | S100 calcium binding protein A6           | 5.90E-16 | 1 | 6.49  | 6.96  | 7.18  | 7.22  | 7.18  | 7.02  | 6.96  | 6.91  |
| TC0102782 | S100A7L2      | 645922 | S100 calcium binding protein A7-like 2    | 0.000503 | 1 | 2.63  | 2.84  | 2.97  | 2.75  | 2.76  | 2.73  | 2.80  | 2.75  |
| TC0102780 | S100A8        | 6279   | S100 calcium binding protein A8           | 4.07E-18 | 1 | 11.15 | 11.61 | 11.65 | 11.66 | 11.64 | 11.59 | 11.50 | 11.44 |
| TC0101079 | S100A9        | 6280   | S100 calcium binding protein A9           | 1.65E-17 | 1 | 11.95 | 12.39 | 12.49 | 12.50 | 12.46 | 12.38 | 12.29 | 12.20 |
| TC0400061 | S100P         | 6286   | S100 calcium binding protein P            | 1.46E-06 | 1 | 8.22  | 9.02  | 9.01  | 8.90  | 8.94  | 8.83  | 8.68  | 8.75  |
| TC0100775 | S1PR1         | 1901   | sphingosine-1-phosphate receptor 1        | 6.61E-23 | 1 | 4.97  | 6.69  | 7.46  | 6.38  | 5.53  | 5.25  | 5.30  | 5.16  |
| TC1900070 | S1PR4         | 8698   | sphingosine-1-phosphate receptor 4        | 0.000483 | 1 | 5.18  | 5.80  | 5.86  | 5.81  | 5.78  | 5.73  | 5.55  | 5.73  |
| TC1901235 | SAMD1         | 90378  | sterile alpha motif domain containing 1   | 0.000614 | 1 | 4.83  | 5.04  | 5.08  | 5.07  | 5.15  | 5.06  | 5.07  | 4.93  |
| TC1000353 | SAMD8         | 142891 | sterile alpha motif domain containing 8   | 6.23E-05 | 1 | 6.31  | 6.72  | 6.53  | 6.42  | 6.35  | 6.49  | 6.42  | 6.41  |
| TC2100221 | SAMSN1        | 64092  | SAM domain, SH3 domain and nuclear        | 9.51E-40 | 1 | 6.71  | 9.74  | 9.56  | 9.12  | 8.94  | 8.51  | 8.42  | 8.17  |
| TC0400681 | SAP30         | 8819   | Sin3A-associated protein, 30kDa           | 7.71E-07 | 1 | 5.42  | 7.00  | 6.62  | 6.80  | 6.82  | 6.68  | 6.81  | 6.63  |
| TC0501291 | SAR1B         | 51128  | SAR1 gene homolog B (S. cerevisiae)       | 2.93E-20 | 1 | 5.74  | 6.52  | 7.02  | 6.89  | 6.72  | 6.38  | 6.38  | 6.31  |

|           |                         |        |                                           |          |   |      |      |      |      |      |      |      |      |
|-----------|-------------------------|--------|-------------------------------------------|----------|---|------|------|------|------|------|------|------|------|
| TC1100560 | SART1                   | 9092   | squamous cell carcinoma antigen recog     | 3.85E-10 | 1 | 5.77 | 6.41 | 6.37 | 6.53 | 6.33 | 6.20 | 6.29 | 6.18 |
| TC1700993 | SAT2                    | 112483 | spermidine/spermine N1-acetyltransfe      | 0.000722 | 1 | 4.77 | 5.30 | 5.22 | 5.31 | 5.31 | 5.19 | 5.17 | 5.00 |
| TC0301049 | SATB1                   | 6304   | SATB homeobox 1 /// DNA-binding pro       | 3.80E-08 | 1 | 6.04 | 6.51 | 6.18 | 6.16 | 6.04 | 6.02 | 6.09 | 5.98 |
| TC1201660 | SBNO1                   | 55206  | strawberry notch homolog 1 (Drosophi      | 2.33E-05 | 1 | 6.89 | 7.37 | 7.34 | 7.39 | 7.31 | 7.16 | 7.19 | 7.11 |
| TC0400662 | SC4MOL                  | 6307   | sterol-C4-methyl oxidase-like             | 2.36E-14 | 1 | 4.96 | 5.83 | 5.81 | 5.78 | 5.90 | 5.65 | 5.49 | 5.25 |
| TC1100933 | SC5DL                   | 6309   | sterol-C5-desaturase (ERG3 delta-5-des    | 2.62E-07 | 1 | 3.81 | 4.29 | 4.11 | 4.13 | 4.28 | 4.23 | 4.22 | 4.15 |
| TC1501106 | SCAMP2                  | 10066  | secretory carrier membrane protein 2      | 0.000635 | 1 | 5.97 | 6.26 | 6.29 | 6.33 | 6.31 | 6.32 | 6.25 | 6.20 |
| TC1100751 | SCARNA9                 | ---    | small Cajal body-specific RNA 9 (SCARN    | 0.000429 | 1 | 7.83 | 8.50 | 8.73 | 8.77 | 8.76 | 8.66 | 8.51 | 8.44 |
| TC0101689 | SCCPDH                  | 51097  | saccharopine dehydrogenase (putative      | 3.17E-11 | 1 | 3.79 | 5.38 | 5.00 | 4.71 | 4.76 | 4.97 | 4.84 | 4.68 |
| TC1400141 | SCFD1                   | 23256  | sec1 family domain containing 1           | 3.14E-12 | 1 | 4.93 | 5.83 | 6.06 | 5.79 | 5.62 | 5.65 | 5.68 | 5.50 |
| TC0501564 | SCGB3A1                 | 92304  | secretoglobin, family 3A, member 1        | 2.59E-06 | 1 | 4.87 | 5.28 | 5.28 | 5.20 | 5.29 | 5.28 | 5.16 | 5.13 |
| TC1200342 | SCN8A                   | 6334   | sodium channel, voltage gated, type VI    | 2.25E-06 | 1 | 2.67 | 2.77 | 2.84 | 2.92 | 2.95 | 2.81 | 2.77 | 2.69 |
| TC0202070 | SCN9A                   | 6335   | sodium channel, voltage-gated, type IX    | 0.000901 | 1 | 2.64 | 3.29 | 3.23 | 3.36 | 3.40 | 3.27 | 3.17 | 2.99 |
| TC0100561 | SCP2                    | 6342   | sterol carrier protein 2                  | 4.88E-06 | 1 | 3.99 | 4.78 | 4.94 | 4.90 | 5.04 | 4.91 | 4.89 | 4.69 |
| TC1700617 | SCPEP1                  | 59342  | serine carboxypeptidase 1                 | 3.06E-08 | 1 | 6.31 | 6.92 | 6.98 | 7.19 | 7.12 | 6.73 | 6.71 | 6.61 |
| TC1200621 | SCYL2                   | 55681  | SCY1-like 2 (S. cerevisiae) /// SCY1-like | 9.45E-08 | 1 | 7.00 | 7.53 | 7.51 | 7.46 | 7.37 | 7.38 | 7.33 | 7.34 |
| TC0102060 | SDC3                    | 9672   | syndecan 3 /// Syndecan-3 (SYND3). [Sc    | 0.000826 | 1 | 4.29 | 4.52 | 4.47 | 4.46 | 4.50 | 4.50 | 4.41 | 4.43 |
| TC2000492 | SDCBP2 /// FKE27111 /// |        | syndecan binding protein (syntenin) 2 /   | 2.64E-09 | 1 | 5.38 | 5.68 | 5.77 | 5.68 | 5.66 | 5.63 | 5.50 | 5.54 |
| TC0500215 | SDCCAG10                | 10283  | serologically defined colon cancer anti   | 5.46E-12 | 1 | 4.03 | 5.41 | 5.33 | 5.38 | 5.51 | 5.45 | 5.50 | 5.13 |
| TC0101211 | SDHC                    | 6391   | succinate dehydrogenase complex, sub      | 1.41E-21 | 1 | 5.40 | 6.46 | 6.79 | 6.70 | 6.49 | 6.27 | 6.06 | 5.95 |
| TC0901442 | SEC16A                  | 9919   | SEC16 homolog A (S. cerevisiae) /// Uni   | 1.11E-05 | 1 | 5.56 | 5.98 | 5.72 | 5.65 | 5.69 | 5.59 | 5.53 | 5.51 |
| TC0300561 | SEC22A                  | 26984  | SEC22 vesicle trafficking protein homol   | 9.75E-06 | 1 | 3.43 | 3.86 | 3.82 | 3.75 | 3.88 | 3.74 | 3.82 | 3.74 |
| TC0100924 | SEC22B                  | 9554   | SEC22 vesicle trafficking protein homol   | 1.80E-08 | 1 | 7.83 | 8.47 | 8.57 | 8.38 | 8.24 | 8.32 | 8.23 | 8.25 |
| TC0301130 | SEC22C                  | 9117   | SEC22 vesicle trafficking protein homol   | 5.44E-19 | 1 | 4.40 | 4.91 | 5.21 | 5.05 | 4.93 | 4.75 | 4.75 | 4.67 |
| TC1400807 | SEC23A                  | 10484  | Sec23 homolog A (S. cerevisiae)           | 5.09E-11 | 1 | 5.06 | 5.76 | 5.75 | 5.60 | 5.54 | 5.53 | 5.48 | 5.34 |
| TC2000109 | SEC23B                  | 10483  | Sec23 homolog B (S. cerevisiae) /// Pro   | 1.59E-13 | 1 | 5.60 | 6.45 | 6.48 | 6.49 | 6.40 | 6.36 | 6.32 | 6.20 |
| TC0500483 | SEC24A                  | ---    | Protein transport protein Sec24A (SEC2    | 1.92E-27 | 1 | 4.94 | 5.99 | 6.62 | 6.42 | 6.11 | 5.74 | 5.73 | 5.50 |
| TC0701212 | SEC61G                  | 23480  | Sec61 gamma subunit                       | 5.07E-21 | 1 | 5.80 | 6.81 | 6.97 | 6.85 | 6.85 | 6.78 | 6.70 | 6.65 |
| TC0300778 | SEC62                   | 7095   | SEC62 homolog (S. cerevisiae)             | 1.17E-18 | 1 | 7.93 | 8.78 | 8.87 | 8.77 | 8.71 | 8.68 | 8.65 | 8.59 |
| TC0601504 | SEC63                   | 11231  | SEC63 homolog (S. cerevisiae)             | 1.33E-08 | 1 | 5.94 | 6.84 | 6.71 | 6.66 | 6.94 | 6.87 | 6.90 | 6.55 |
| TC0300709 | SELT /// SELT_1         | 51714  | selenoprotein T /// Selenoprotein T pre   | 2.18E-19 | 1 | 8.06 | 8.58 | 8.95 | 8.84 | 8.72 | 8.59 | 8.47 | 8.52 |
| TC0101138 | SEMA4A                  | 64218  | sema domain, immunoglobulin domain        | 2.73E-05 | 1 | 6.64 | 6.93 | 7.13 | 7.14 | 7.07 | 6.89 | 6.88 | 6.72 |
| TC1901058 | SEMA6B                  | 10501  | sema domain, transmembrane domain         | 3.16E-14 | 1 | 4.54 | 4.87 | 4.86 | 4.62 | 4.64 | 4.56 | 4.51 | 4.51 |
| TC0300867 | SENP2                   | 59343  | SUMO1/sentrin/SMT3 specific peptidas      | 5.40E-06 | 1 | 6.05 | 6.66 | 6.45 | 6.38 | 6.34 | 6.47 | 6.38 | 6.39 |

|           |                         |        |                                           |          |   |      |      |      |      |      |      |      |      |
|-----------|-------------------------|--------|-------------------------------------------|----------|---|------|------|------|------|------|------|------|------|
| TC0102404 | SEP15 /// SEP1          | 9403   | 15 kDa selenoprotein /// 15 kDa selenc    | 1.70E-09 | 1 | 6.59 | 6.80 | 7.19 | 7.16 | 7.03 | 7.03 | 7.00 | 6.97 |
| TC1601011 | SEPHS2                  | 22928  | selenophosphate synthetase 2              | 7.37E-15 | 1 | 5.71 | 6.45 | 6.46 | 6.49 | 6.44 | 6.34 | 6.37 | 6.28 |
| TC0601714 | SERAC1                  | 84947  | serine active site containing 1 /// Prote | 0.000468 | 1 | 3.05 | 3.08 | 3.11 | 3.18 | 3.04 | 3.00 | 3.05 | 3.00 |
| TC0100343 | SERINC2                 | 347735 | serine incorporator 2 /// Serine incorpc  | 9.21E-07 | 1 | 4.88 | 5.10 | 5.03 | 5.15 | 5.14 | 5.01 | 4.97 | 4.95 |
| TC0301660 | SERP1                   | 27230  | stress-associated endoplasmic reticulur   | 5.80E-14 | 1 | 3.95 | 4.52 | 4.71 | 4.68 | 4.60 | 4.54 | 4.64 | 4.63 |
| TC0600903 | SERPINB1                | 1992   | serpin peptidase inhibitor, clade B (ova  | 1.61E-27 | 1 | 7.66 | 9.16 | 9.18 | 8.83 | 8.60 | 8.46 | 8.37 | 8.15 |
| TC1800239 | SERPINB2                | 5055   | serpin peptidase inhibitor, clade B (ova  | 0.000129 | 1 | 3.17 | 3.74 | 3.68 | 4.03 | 3.97 | 3.76 | 3.75 | 3.65 |
| TC1800242 | SERPINB8                | 5271   | serpin peptidase inhibitor, clade B (ova  | 2.24E-23 | 1 | 4.53 | 5.38 | 5.36 | 5.44 | 5.33 | 5.06 | 4.92 | 4.87 |
| TC0600905 | SERPINB9                | 5272   | serpin peptidase inhibitor, clade B (ova  | 0.00029  | 1 | 4.81 | 5.56 | 5.45 | 5.08 | 4.94 | 5.06 | 5.20 | 5.12 |
| TC0601509 | SESN1                   | 27244  | sestrin 1 /// Sestrin-1 (p53-regulated pi | 7.81E-05 | 1 | 4.59 | 4.54 | 4.76 | 4.84 | 4.80 | 4.61 | 4.55 | 4.53 |
| TC0100321 | SESN2                   | 83667  | sestrin 2                                 | 1.07E-08 | 1 | 5.02 | 5.65 | 5.29 | 5.19 | 5.21 | 5.10 | 5.10 | 5.06 |
| TC0202143 | SESTD1                  | 91404  | SEC14 and spectrin domains 1              | 0.000189 | 1 | 4.75 | 5.79 | 5.73 | 5.74 | 5.66 | 5.67 | 5.72 | 5.62 |
| TC1401118 | SETD3                   | 84193  | SET domain containing 3 /// SET domai     | 1.86E-07 | 1 | 5.54 | 6.09 | 6.27 | 6.24 | 6.15 | 6.04 | 6.10 | 6.07 |
| TC1200789 | SETD8                   | 387893 | SET domain containing (lysine methyltr    | 5.48E-07 | 1 | 5.34 | 5.87 | 5.90 | 5.94 | 5.98 | 5.86 | 5.86 | 5.66 |
| TC0201353 | SF3B14                  | 51639  | splicing factor 3B, 14 kDa subunit        | 6.60E-07 | 1 | 7.54 | 8.24 | 8.36 | 8.31 | 8.22 | 8.31 | 8.22 | 8.29 |
| TC0501024 | SFRS12IP1               | 285672 | SFRS12-interacting protein 1              | 2.12E-23 | 1 | 5.00 | 6.91 | 6.64 | 6.50 | 6.72 | 6.63 | 6.51 | 6.22 |
| TC1201627 | SFRS9                   | 8683   | splicing factor, arginine/serine-rich 9   | 3.59E-10 | 1 | 6.66 | 7.23 | 7.18 | 7.10 | 7.12 | 7.10 | 7.06 | 7.01 |
| TC0601752 | SFT2D1                  | 113402 | SFT2 domain containing 1 /// Vesicle tr   | 1.34E-11 | 1 | 6.76 | 7.43 | 7.55 | 7.40 | 7.33 | 7.41 | 7.34 | 7.34 |
| TC0101266 | SFT2D2 /// TBX375035 // | 375035 | SFT2 domain containing 2 /// T-box 19     | 5.15E-11 | 1 | 4.57 | 5.04 | 5.13 | 4.81 | 4.69 | 4.63 | 4.56 | 4.60 |
| TC0500724 | SFXN1                   | 94081  | sideroflexin 1                            | 1.33E-08 | 1 | 4.18 | 5.27 | 4.97 | 4.79 | 5.00 | 4.75 | 4.76 | 4.46 |
| TC0201619 | SFXN5                   | 94097  | sideroflexin 5                            | 8.76E-05 | 1 | 5.05 | 5.20 | 5.24 | 5.14 | 5.19 | 5.08 | 5.04 | 5.02 |
| TC1501128 | SGK269                  | 79834  | NKF3 kinase family member                 | 4.02E-10 | 1 | 4.17 | 5.83 | 5.39 | 5.18 | 5.17 | 4.95 | 4.69 | 4.48 |
| TC0400446 | SGMS2                   | 166929 | sphingomyelin synthase 2                  | 1.72E-17 | 1 | 3.81 | 4.55 | 4.75 | 4.77 | 4.63 | 4.28 | 4.27 | 4.14 |
| TC1400910 | SGPP1                   | 81537  | sphingosine-1-phosphate phosphatase       | 8.09E-06 | 1 | 4.36 | 4.79 | 4.94 | 5.22 | 5.04 | 4.80 | 4.81 | 4.99 |
| TC1701764 | SGSH                    | 6448   | N-sulfoglucosamine sulfohydrolase (sul    | 8.06E-07 | 1 | 4.62 | 4.81 | 4.86 | 4.94 | 4.88 | 4.82 | 4.71 | 4.69 |
| TC0501029 | SGTB                    | 54557  | small glutamine-rich tetratricopeptide    | 4.93E-13 | 1 | 6.05 | 6.87 | 7.17 | 7.02 | 6.72 | 6.60 | 6.63 | 6.50 |
| TC0X00387 | SH3BGRL                 | 6451   | SH3 domain binding glutamic acid-rich     | 4.44E-05 | 1 | 6.66 | 6.96 | 7.45 | 7.32 | 7.02 | 7.14 | 7.12 | 7.09 |
| TC0301037 | SH3BP5                  | 9467   | SH3-domain binding protein 5 (BTK-ass     | 8.49E-28 | 1 | 6.34 | 7.87 | 7.51 | 7.19 | 7.02 | 6.83 | 6.58 | 6.57 |
| TC0100702 | SH3GLB1                 | 51100  | SH3-domain GRB2-like endophilin B1 //     | 6.63E-18 | 1 | 8.12 | 8.86 | 9.13 | 9.05 | 8.97 | 8.95 | 8.82 | 8.76 |
| TC0401394 | SH3RF1                  | 57630  | SH3 domain containing ring finger 1       | 0.000132 | 1 | 3.60 | 3.82 | 3.90 | 3.87 | 3.99 | 3.90 | 3.79 | 3.73 |
| TC0900920 | SHB                     | 6461   | Src homology 2 domain containing ada      | 2.47E-12 | 1 | 4.44 | 4.98 | 4.82 | 4.73 | 4.74 | 4.67 | 4.66 | 4.58 |
| TC1000584 | SHOC2                   | 8036   | soc-2 suppressor of clear homolog (C. e   | 4.75E-05 | 1 | 8.45 | 8.79 | 8.76 | 8.71 | 8.59 | 8.68 | 8.55 | 8.64 |
| TC0X00924 | SHROOM4                 | 57477  | shroom family member 4                    | 0.000176 | 1 | 3.34 | 3.53 | 3.46 | 3.46 | 3.55 | 3.51 | 3.53 | 3.34 |
| TC1900754 | SIGLEC9                 | 27180  | sialic acid binding Ig-like lectin 9      | 9.59E-07 | 1 | 7.75 | 8.13 | 8.27 | 8.23 | 8.04 | 7.74 | 7.63 | 7.54 |



|           |                |           |                                              |          |   |      |      |      |      |      |      |      |      |
|-----------|----------------|-----------|----------------------------------------------|----------|---|------|------|------|------|------|------|------|------|
| TC0501330 | SIL1           | 64374     | SIL1 homolog, endoplasmic reticulum c        | 1.51E-14 | 1 | 4.92 | 5.38 | 5.63 | 5.49 | 5.41 | 5.26 | 5.22 | 5.13 |
| TC0103353 | SIPA1L2        | 57568     | signal-induced proliferation-associated      | 2.62E-12 | 1 | 5.92 | 7.18 | 6.87 | 6.73 | 6.50 | 6.38 | 6.29 | 6.16 |
| TC0600084 | SIRT5          | 23408     | sirtuin (silent mating type information      | 1.16E-14 | 1 | 5.11 | 5.82 | 6.11 | 6.08 | 5.91 | 5.63 | 5.53 | 5.46 |
| TC0701079 | SKAP2          | 8935      | src kinase associated phosphoprotein 2       | 6.15E-06 | 1 | 9.15 | 9.35 | 9.55 | 9.21 | 9.12 | 9.18 | 9.12 | 9.18 |
| TC0300785 | SKIL           | 6498      | SKI-like oncogene                            | 2.39E-20 | 1 | 5.84 | 7.52 | 7.16 | 6.89 | 6.79 | 6.86 | 6.63 | 6.58 |
| TC0501287 | SKP1           | 6500      | S-phase kinase-associated protein 1          | 2.54E-05 | 1 | 7.86 | 8.17 | 8.28 | 8.19 | 8.13 | 8.21 | 8.21 | 8.23 |
| TC0801263 | SLA            | 6503      | Src-like-adaptor                             | 2.14E-10 | 1 | 6.99 | 7.62 | 7.56 | 7.13 | 6.93 | 7.07 | 6.97 | 6.99 |
| TC1300211 | SLAIN1         | 122060    | SLAIN motif family, member 1 /// SLAIN       | 9.06E-07 | 1 | 4.67 | 5.54 | 5.66 | 5.50 | 5.53 | 5.53 | 5.40 | 5.41 |
| TC1700855 | SLC16A3        | 9123      | solute carrier family 16, member 3 (mo       | 0.000743 | 1 | 5.85 | 6.12 | 6.07 | 6.13 | 6.08 | 6.03 | 5.94 | 5.98 |
| TC0601395 | SLC17A5        | 26503     | solute carrier family 17 (anion/sugar tra    | 1.11E-10 | 1 | 4.86 | 5.50 | 5.60 | 5.58 | 5.65 | 5.60 | 5.62 | 5.49 |
| TC0500125 | SLC1A3         | 6507      | solute carrier family 1 (glial high affinity | 2.68E-18 | 1 | 3.24 | 4.40 | 4.57 | 3.75 | 3.55 | 3.40 | 3.36 | 3.24 |
| TC0800906 | SLC20A2        | 6575      | solute carrier family 20 (phosphate tra      | 0.00057  | 1 | 4.16 | 4.32 | 4.34 | 4.30 | 4.34 | 4.28 | 4.25 | 4.24 |
| TC0500462 | SLC22A4        | 6583      | solute carrier family 22 (organic cation,    | 1.86E-16 | 1 | 5.90 | 6.77 | 7.29 | 7.35 | 6.79 | 6.69 | 6.69 | 6.54 |
| TC2000114 | SLC24A3        | 57419     | solute carrier family 24 (sodium/potass      | 4.57E-08 | 1 | 4.61 | 4.98 | 4.73 | 4.68 | 4.73 | 4.77 | 4.69 | 4.70 |
| TC0202095 | SLC25A12       | 8604      | solute carrier family 25 (mitochondrial      | 3.54E-09 | 1 | 3.65 | 3.92 | 4.22 | 3.99 | 3.89 | 3.90 | 3.85 | 3.76 |
| TC0102502 | SLC25A24       | 29957     | solute carrier family 25 (mitochondrial      | 3.50E-29 | 1 | 4.58 | 6.11 | 6.45 | 6.07 | 5.89 | 5.58 | 5.48 | 5.35 |
| TC0701398 | SLC25A40       | 55972     | solute carrier family 25, member 40          | 3.16E-26 | 1 | 4.81 | 6.93 | 7.05 | 6.59 | 6.59 | 6.21 | 5.95 | 5.74 |
| TC0601207 | SLC26A8        | 116369    | solute carrier family 26, member 8 /// s     | 3.12E-12 | 1 | 4.26 | 5.43 | 5.55 | 5.41 | 5.31 | 5.16 | 5.06 | 4.75 |
| TC0102181 | SLC2A1         | 6513      | solute carrier family 2 (facilitated gluco   | 6.31E-13 | 1 | 5.01 | 5.34 | 5.47 | 5.67 | 5.59 | 5.44 | 5.33 | 5.10 |
| TC1200933 | SLC2A14 /// SL | 144195 // | solute carrier family 2 (facilitated gluco   | 4.01E-24 | 1 | 6.64 | 7.49 | 7.46 | 7.38 | 7.22 | 7.10 | 6.90 | 6.83 |
| TC0100771 | SLC30A7        | 148867    | solute carrier family 30 (zinc transporte    | 1.13E-11 | 1 | 5.02 | 6.04 | 5.80 | 5.59 | 5.38 | 5.45 | 5.53 | 5.42 |
| TC0400192 | SLC30A9        | 10463     | solute carrier family 30 (zinc transporte    | 0.000159 | 1 | 4.88 | 5.29 | 5.41 | 5.34 | 5.18 | 5.15 | 5.21 | 5.15 |
| TC0600940 | SLC35B3        | 51000     | solute carrier family 35, member B3 ///      | 4.29E-06 | 1 | 4.82 | 4.90 | 5.12 | 5.06 | 4.96 | 4.96 | 4.99 | 4.93 |
| TC0500619 | SLC36A1        | 206358    | solute carrier family 36 (proton/amino       | 2.67E-08 | 1 | 5.79 | 5.84 | 6.15 | 6.09 | 5.93 | 5.81 | 5.74 | 5.67 |
| TC1101742 | SLC36A4        | 120103    | solute carrier family 36 (proton/amino       | 1.81E-17 | 1 | 4.39 | 6.66 | 5.87 | 5.43 | 5.62 | 5.50 | 5.30 | 5.01 |
| TC0701684 | SLC37A3        | 84255     | solute carrier family 37 (glycerol-3-pho     | 2.43E-20 | 1 | 5.74 | 7.34 | 6.98 | 6.73 | 6.65 | 6.36 | 6.11 | 5.82 |
| TC1201129 | SLC38A2        | 54407     | solute carrier family 38, member 2           | 1.57E-15 | 1 | 8.28 | 9.21 | 9.28 | 9.19 | 9.13 | 8.94 | 8.90 | 8.78 |
| TC0500988 | SLC38A9        | 153129    | solute carrier family 38, member 9           | 6.58E-06 | 1 | 3.49 | 3.87 | 4.01 | 3.84 | 3.79 | 3.81 | 3.93 | 3.78 |
| TC0401154 | SLC39A8        | 64116     | solute carrier family 39 (zinc transporte    | 3.29E-11 | 1 | 3.64 | 4.34 | 4.50 | 4.74 | 4.72 | 4.40 | 4.38 | 4.17 |
| TC0202172 | SLC40A1        | 30061     | solute carrier family 40 (iron-regulated     | 2.22E-13 | 1 | 6.75 | 7.36 | 7.79 | 7.74 | 7.64 | 7.52 | 7.34 | 7.37 |
| TC0100747 | SLC44A3        | 126969    | solute carrier family 44, member 3           | 5.29E-08 | 1 | 3.01 | 3.06 | 3.21 | 2.99 | 3.06 | 3.03 | 2.97 | 2.99 |
| TC1300370 | SLC46A3        | 283537    | solute carrier family 46, member 3           | 7.02E-10 | 1 | 4.68 | 5.50 | 5.84 | 5.33 | 5.17 | 5.28 | 5.24 | 5.04 |
| TC0200136 | SLC4A1AP       | 22950     | solute carrier family 4 (anion exchange      | 2.38E-06 | 1 | 6.52 | 7.59 | 7.61 | 7.42 | 7.23 | 7.27 | 7.41 | 7.21 |
| TC0700890 | SLC4A2         | 6522      | solute carrier family 4, anion exchange      | 0.000299 | 1 | 4.59 | 4.72 | 4.70 | 4.63 | 4.66 | 4.64 | 4.62 | 4.60 |

|           |                |        |                                           |          |   |      |      |      |      |      |      |      |      |
|-----------|----------------|--------|-------------------------------------------|----------|---|------|------|------|------|------|------|------|------|
| TC1601328 | SLC7A5         | 8140   | solute carrier family 7 (cationic amino a | 4.49E-05 | 1 | 4.35 | 4.88 | 4.53 | 4.49 | 4.55 | 4.44 | 4.49 | 4.36 |
| TC0200540 | SLC9A4         | 389015 | solute carrier family 9 (sodium/hydrog    | 2.33E-07 | 1 | 2.51 | 3.01 | 2.83 | 2.74 | 2.78 | 2.64 | 2.46 | 2.56 |
| TC0X00590 | SLC9A6         | 10479  | solute carrier family 9 (sodium/hydrog    | 1.15E-20 | 1 | 4.37 | 5.29 | 5.42 | 5.14 | 5.04 | 4.90 | 4.84 | 4.70 |
| TC2000360 | SLC9A8         | 23315  | solute carrier family 9 (sodium/hydrog    | 1.43E-06 | 1 | 6.98 | 7.29 | 7.08 | 7.08 | 7.07 | 6.97 | 6.94 | 6.78 |
| TC0501184 | SLCO4C1        | 353189 | solute carrier organic anion transport    | 5.36E-14 | 1 | 6.77 | 8.12 | 8.20 | 7.98 | 7.87 | 7.73 | 7.47 | 7.50 |
| TC0400575 | SMAD1          | 4086   | SMAD family member 1                      | 4.80E-07 | 1 | 3.78 | 4.07 | 4.14 | 4.04 | 4.05 | 3.87 | 3.91 | 3.83 |
| TC0600497 | SMAP1          | 60682  | stromal membrane-associated GTPase-       | 1.28E-08 | 1 | 5.63 | 6.02 | 6.12 | 6.03 | 5.94 | 5.98 | 6.01 | 5.98 |
| TC2200124 | SMARCB1        | 6598   | SWI/SNF related, matrix associated, ac    | 0.00024  | 1 | 5.10 | 5.65 | 5.40 | 5.40 | 5.49 | 5.43 | 5.47 | 5.32 |
| TC1700903 | SMG6           | 23293  | Smg-6 homolog, nonsense mediated m        | 0.000923 | 1 | 4.54 | 4.67 | 4.61 | 4.56 | 4.62 | 4.53 | 4.52 | 4.44 |
| TC0600694 | SMPDL3A        | 10924  | sphingomyelin phosphodiesterase, acic     | 6.73E-16 | 1 | 3.66 | 5.41 | 5.81 | 5.56 | 5.21 | 4.61 | 4.37 | 4.03 |
| TC0900851 | SMU1           | 55234  | smu-1 suppressor of mec-8 and unc-52      | 0.00024  | 1 | 6.25 | 6.78 | 6.69 | 6.71 | 6.58 | 6.59 | 6.58 | 6.55 |
| TC0101084 | SNAPIN         | 23557  | SNAP-associated protein                   | 1.32E-10 | 1 | 5.05 | 6.11 | 6.25 | 6.01 | 5.83 | 5.76 | 5.72 | 5.66 |
| TC1701494 | SNF8           | 11267  | SNF8, ESCRT-II complex subunit, homol     | 3.60E-05 | 1 | 5.73 | 6.25 | 6.35 | 6.34 | 6.28 | 6.28 | 6.29 | 6.22 |
| TC0700411 | SNORA14A       | ---    | small nucleolar RNA, H/ACA box 14A (S     | 3.05E-09 | 1 | 4.26 | 5.41 | 5.12 | 4.79 | 4.72 | 4.62 | 4.37 | 4.52 |
| TC1300450 | SNORA31        | ---    | small nucleolar RNA, H/ACA box 31 (SN     | 5.69E-05 | 1 | 6.53 | 7.46 | 7.53 | 7.15 | 7.25 | 7.27 | 7.11 | 7.08 |
| TC2000090 | SNRNPB2        | 6629   | small nuclear ribonucleoprotein polype    | 1.31E-12 | 1 | 5.32 | 6.40 | 6.61 | 6.38 | 6.30 | 6.38 | 6.47 | 6.31 |
| TC1600551 | SNTB2          | 6645   | syntrophin, beta 2 (dystrophin-associat   | 6.39E-10 | 1 | 5.08 | 5.88 | 5.88 | 5.68 | 5.70 | 5.58 | 5.49 | 5.31 |
| TC1500400 | SNX1           | 6642   | sorting nexin 1                           | 5.00E-06 | 1 | 7.00 | 7.47 | 7.48 | 7.44 | 7.24 | 7.21 | 7.23 | 7.20 |
| TC0X01006 | SNX12          | 29934  | sorting nexin 12 /// Sorting nexin-12. [S | 3.03E-15 | 1 | 5.89 | 6.39 | 6.57 | 6.46 | 6.50 | 6.40 | 6.29 | 6.28 |
| TC0801073 | SNX16          | 64089  | sorting nexin 16                          | 8.46E-05 | 1 | 4.41 | 4.95 | 5.11 | 5.13 | 4.89 | 4.95 | 4.99 | 4.89 |
| TC0500179 | SNX18 /// SNAI | 112574 | sorting nexin 18 /// Sorting nexin-18 (S  | 1.99E-10 | 1 | 6.62 | 7.16 | 7.07 | 6.88 | 6.68 | 6.68 | 6.55 | 6.54 |
| TC0601507 | SNX3           | 8724   | sorting nexin 3 /// Sorting nexin-3 (Pro  | 5.15E-40 | 1 | 6.03 | 7.64 | 7.95 | 7.64 | 7.52 | 7.17 | 7.02 | 6.81 |
| TC0301511 | SNX4           | 8723   | sorting nexin 4                           | 7.31E-13 | 1 | 4.19 | 5.46 | 5.54 | 5.45 | 5.47 | 5.40 | 5.46 | 5.25 |
| TC1701740 | SOCS3          | 9021   | suppressor of cytokine signaling 3        | 9.83E-18 | 1 | 6.08 | 7.94 | 7.83 | 7.58 | 7.31 | 7.29 | 7.10 | 6.97 |
| TC0102517 | SORT1          | 6272   | sortilin 1                                | 1.49E-21 | 1 | 5.21 | 7.51 | 7.64 | 7.09 | 6.93 | 6.59 | 6.50 | 6.27 |
| TC1400842 | SOS2           | 6655   | son of sevenless homolog 2 (Drosophil     | 4.81E-11 | 1 | 8.04 | 8.46 | 8.54 | 8.44 | 8.31 | 8.25 | 8.14 | 8.06 |
| TC0701044 | SP8            | 221833 | Sp8 transcription factor /// Transcriptic | 0.000145 | 1 | 3.81 | 4.03 | 3.99 | 3.84 | 3.95 | 3.91 | 3.80 | 3.91 |
| TC1100964 | SPA17          | 53340  | sperm autoantigenic protein 17            | 4.50E-08 | 1 | 4.22 | 4.65 | 4.81 | 4.79 | 4.71 | 4.71 | 4.75 | 4.58 |
| TC1300029 | SPATA13 /// Q  | 221178 | spermatogenesis associated 13 /// Spe     | 1.34E-11 | 1 | 5.50 | 6.18 | 6.03 | 5.91 | 5.64 | 5.67 | 5.66 | 5.68 |
| TC0800615 | SPATC1         | 375686 | spermatogenesis and centriole associat    | 5.19E-09 | 1 | 4.46 | 4.90 | 4.86 | 4.76 | 4.70 | 4.58 | 4.60 | 4.57 |
| TC0400691 | SPCS3          | 60559  | signal peptidase complex subunit 3 hor    | 1.55E-10 | 1 | 6.30 | 6.97 | 7.17 | 7.03 | 7.02 | 7.04 | 7.04 | 6.92 |
| TC0200141 | SPDYA /// PPP1 | 245711 | // speedy homolog A (Drosophila) /// pro  | 7.37E-14 | 1 | 6.20 | 6.76 | 6.76 | 6.62 | 6.46 | 6.43 | 6.34 | 6.33 |
| TC2200137 | SPECC1L        | 23384  | SPECC1-like                               | 2.14E-08 | 1 | 5.44 | 6.45 | 6.01 | 5.93 | 5.82 | 5.58 | 5.72 | 5.50 |
| TC1300400 | SPG20          | 23111  | spastic paraplegia 20 (Troyer syndrom     | 2.04E-06 | 1 | 5.25 | 5.93 | 5.71 | 5.55 | 5.68 | 5.76 | 5.84 | 5.82 |

|           |            |                |                                              |          |   |      |      |      |      |      |      |      |      |
|-----------|------------|----------------|----------------------------------------------|----------|---|------|------|------|------|------|------|------|------|
| TC1900498 | SPINT2     | 10653          | serine peptidase inhibitor, Kunitz type,     | 1.83E-14 | 1 | 5.68 | 6.84 | 6.56 | 6.31 | 6.49 | 6.45 | 6.38 | 6.31 |
| TC1500954 | SPPL2A     | 84888          | signal peptide peptidase-like 2A             | 5.14E-12 | 1 | 6.91 | 7.64 | 7.93 | 7.88 | 7.63 | 7.51 | 7.62 | 7.49 |
| TC0201578 | SPRED2     | 200734         | sprouty-related, EVH1 domain containi        | 2.07E-15 | 1 | 4.01 | 5.20 | 4.67 | 4.54 | 4.72 | 4.46 | 4.43 | 4.37 |
| TC0101072 | SPRR1A     | 6698           | small proline-rich protein 1A                | 0.000511 | 1 | 6.11 | 6.54 | 6.37 | 6.33 | 6.23 | 6.28 | 6.30 | 6.27 |
| TC0901126 | SPTLC1     | 731770         | // serine palmitoyltransferase, long chain   | 4.74E-05 | 1 | 6.12 | 6.49 | 6.56 | 6.55 | 6.45 | 6.39 | 6.33 | 6.32 |
| TC1401023 | SPTLC2     | 9517           | serine palmitoyltransferase, long chain      | 1.19E-16 | 1 | 7.43 | 8.45 | 8.45 | 8.42 | 8.12 | 7.93 | 7.95 | 7.83 |
| TC1500312 | SQRDL      | /// PLDI 58472 | /// sulfide quinone reductase-like (yeast) / | 2.59E-12 | 1 | 6.42 | 7.02 | 7.14 | 7.05 | 6.99 | 6.99 | 6.96 | 6.88 |
| TC0500031 | SRD5A1     | 6715           | steroid-5-alpha-reductase, alpha polyp       | 1.66E-07 | 1 | 3.76 | 4.13 | 4.37 | 4.24 | 4.21 | 4.06 | 4.09 | 4.06 |
| TC0400236 | SRD5A3     | 79644          | steroid 5 alpha-reductase 3                  | 6.07E-05 | 1 | 2.96 | 2.94 | 3.31 | 3.16 | 3.05 | 2.93 | 3.04 | 3.00 |
| TC0600403 | SRF        | 6722           | serum response factor (c-fos serum res       | 1.30E-09 | 1 | 6.17 | 6.76 | 6.86 | 6.74 | 6.66 | 6.64 | 6.54 | 6.53 |
| TC0701399 | SRI        | 6717           | sorcini                                      | 1.74E-13 | 1 | 7.42 | 8.42 | 8.44 | 8.29 | 8.16 | 8.18 | 8.20 | 8.13 |
| TC1500832 | SRP14      | 6727           | signal recognition particle 14kDa (hom       | 5.08E-16 | 1 | 8.04 | 8.51 | 8.67 | 8.66 | 8.59 | 8.57 | 8.60 | 8.55 |
| TC1400166 | SRP54      | 6729           | signal recognition particle 54kDa            | 7.50E-06 | 1 | 5.62 | 6.38 | 6.15 | 6.03 | 5.95 | 5.96 | 6.01 | 5.90 |
| TC0101560 | SRP9       | 6726           | signal recognition particle 9kDa /// Sigr    | 1.57E-11 | 1 | 7.18 | 7.81 | 7.93 | 7.88 | 7.98 | 7.90 | 7.87 | 7.76 |
| TC1001159 | SRP9       | 6726           | signal recognition particle 9kDa             | 2.06E-07 | 1 | 6.45 | 7.48 | 7.48 | 7.45 | 7.68 | 7.51 | 7.48 | 7.27 |
| TC0601206 | SRPK1      | 6732           | SFRS protein kinase 1 /// Serine/threon      | 1.12E-24 | 1 | 7.10 | 8.42 | 8.36 | 8.23 | 8.18 | 8.09 | 7.98 | 7.74 |
| TC1800386 | SS18       | 6760           | synovial sarcoma translocation, chrom        | 1.28E-06 | 1 | 3.99 | 4.23 | 4.32 | 4.49 | 4.32 | 4.27 | 4.32 | 4.23 |
| TC1900321 | SSBP4      | 170463         | single stranded DNA binding protein 4        | 0.000407 | 1 | 5.72 | 5.90 | 5.90 | 5.86 | 5.88 | 5.89 | 5.83 | 5.79 |
| TC0200909 | SSFA2      | 6744           | sperm specific antigen 2 /// Sperm-spe       | 0.000391 | 1 | 6.81 | 7.09 | 7.30 | 7.14 | 6.90 | 7.04 | 7.06 | 7.08 |
| TC1201541 | SSH1       | 54434          | slingshot homolog 1 (Drosophila) /// Pr      | 1.20E-17 | 1 | 4.32 | 4.90 | 5.10 | 5.12 | 4.92 | 4.60 | 4.59 | 4.46 |
| TC1100990 | ST3GAL4    | 6484           | ST3 beta-galactoside alpha-2,3-sialyltra     | 8.06E-11 | 1 | 5.26 | 5.92 | 5.92 | 5.83 | 5.73 | 5.64 | 5.48 | 5.40 |
| TC0100662 | ST6GALNAC3 | 256435         | ST6 (alpha-N-acetyl-neuraminy-2,3-be         | 2.26E-24 | 1 | 3.39 | 4.98 | 5.39 | 4.63 | 4.46 | 4.28 | 4.06 | 3.84 |
| TC0102549 | ST7L       | 54879          | suppression of tumorigenicity 7 like ///     | 2.51E-16 | 1 | 3.95 | 4.19 | 4.64 | 4.69 | 4.60 | 4.38 | 4.26 | 4.22 |
| TC1000080 | STAM       | 8027           | signal transducing adaptor molecule (S       | 1.45E-08 | 1 | 5.95 | 6.68 | 6.46 | 6.56 | 6.55 | 6.51 | 6.45 | 6.36 |
| TC0700194 | STARD3NL   | 83930          | STARD3 N-terminal like                       | 1.50E-05 | 1 | 5.33 | 5.70 | 6.01 | 5.69 | 5.57 | 5.72 | 5.75 | 5.89 |
| TC0801034 | STAU2      | 27067          | staufen, RNA binding protein, homolog        | 5.87E-17 | 1 | 5.87 | 6.60 | 6.74 | 6.65 | 6.60 | 6.52 | 6.48 | 6.41 |
| TC1100072 | STIM1      | 6786           | stromal interaction molecule 1               | 7.10E-06 | 1 | 5.76 | 5.96 | 5.93 | 6.19 | 6.15 | 5.94 | 5.90 | 5.88 |
| TC0201115 | STK16      | 8576           | serine/threonine kinase 16 /// Serine/t      | 4.56E-11 | 1 | 4.78 | 5.35 | 5.35 | 5.15 | 5.21 | 5.03 | 4.96 | 4.93 |
| TC0700213 | STK17A     | 9263           | serine/threonine kinase 17a                  | 4.11E-05 | 1 | 6.58 | 6.97 | 7.00 | 6.67 | 6.66 | 6.82 | 6.76 | 6.85 |
| TC0202190 | STK17B     | 9262           | serine/threonine kinase 17b                  | 2.63E-08 | 1 | 9.07 | 9.64 | 9.55 | 9.38 | 9.27 | 9.36 | 9.26 | 9.37 |
| TC0202448 | STK25      | 10494          | serine/threonine kinase 25 (STE20 hom        | 0.000527 | 1 | 5.13 | 5.35 | 5.36 | 5.35 | 5.38 | 5.36 | 5.34 | 5.30 |
| TC0801145 | STK3       | 6788           | serine/threonine kinase 3 (STE20 homc        | 1.52E-11 | 1 | 4.51 | 5.30 | 5.65 | 5.30 | 4.99 | 5.10 | 5.10 | 4.95 |
| TC0601214 | STK38      | 11329          | serine/threonine kinase 38                   | 1.06E-09 | 1 | 8.34 | 8.67 | 8.70 | 8.47 | 8.33 | 8.38 | 8.34 | 8.32 |
| TC0901302 | STOM       | 2040           | stomatini                                    | 1.44E-37 | 1 | 5.73 | 9.61 | 9.62 | 9.41 | 9.65 | 9.05 | 8.61 | 7.92 |

|           |            |        |                                           |          |   |      |      |      |      |      |      |      |      |
|-----------|------------|--------|-------------------------------------------|----------|---|------|------|------|------|------|------|------|------|
| TC1200169 | STRAP      | 11171  | serine/threonine kinase receptor assoc    | 3.60E-09 | 1 | 4.88 | 5.82 | 5.75 | 5.65 | 5.71 | 5.69 | 5.62 | 5.52 |
| TC0201428 | STRN       | 6801   | striatin, calmodulin binding protein ///  | 4.06E-06 | 1 | 7.21 | 7.70 | 7.60 | 7.42 | 7.36 | 7.50 | 7.45 | 7.38 |
| TC1400766 | STRN3      | 29966  | striatin, calmodulin binding protein 3    | 5.56E-10 | 1 | 5.80 | 6.46 | 6.42 | 6.33 | 6.19 | 6.13 | 6.10 | 6.00 |
| TC0600780 | STX11      | 8676   | syntaxin 11                               | 7.74E-06 | 1 | 5.89 | 6.65 | 6.58 | 6.72 | 6.49 | 6.46 | 6.34 | 6.43 |
| TC0100312 | STX12      | 23673  | syntaxin 12 /// Syntaxin-12. [Source:Un   | 2.78E-05 | 1 | 6.81 | 7.21 | 7.27 | 7.21 | 7.04 | 7.14 | 7.04 | 7.10 |
| TC0400790 | STX18      | 53407  | syntaxin 18                               | 5.52E-06 | 1 | 4.48 | 5.13 | 5.28 | 5.13 | 5.24 | 5.10 | 5.13 | 4.98 |
| TC0103044 | STX6       | 10228  | syntaxin 6                                | 0.000782 | 1 | 5.64 | 6.04 | 6.08 | 6.18 | 5.98 | 6.08 | 6.03 | 6.04 |
| TC1701022 | STX8       | 9482   | syntaxin 8                                | 2.59E-09 | 1 | 4.08 | 4.80 | 4.86 | 4.90 | 4.88 | 4.78 | 4.79 | 4.63 |
| TC0701356 | STYXL1     | 51657  | serine/threonine/tyrosine interacting-l   | 2.50E-06 | 1 | 5.87 | 6.51 | 6.76 | 6.58 | 6.42 | 6.54 | 6.48 | 6.42 |
| TC0500104 | SUB1       | 730602 | // SUB1 homolog (S. cerevisiae)           | 2.53E-19 | 1 | 6.08 | 7.22 | 7.31 | 7.01 | 6.79 | 6.86 | 6.88 | 6.82 |
| TC0201667 | SUCLG1     | 8802   | succinate-CoA ligase, alpha subunit ///   | 5.68E-17 | 1 | 5.33 | 6.32 | 6.49 | 6.47 | 6.47 | 6.24 | 6.13 | 5.93 |
| TC0401016 | SULT1B1    | 27284  | sulfotransferase family, cytosolic, 1B, n | 4.82E-14 | 1 | 7.59 | 8.46 | 8.96 | 8.68 | 8.43 | 8.39 | 8.11 | 8.05 |
| TC0201432 | SULT6B1    | 391365 | sulfotransferase family, cytosolic, 6B, n | 8.62E-06 | 1 | 2.42 | 2.56 | 2.64 | 2.44 | 2.46 | 2.46 | 2.35 | 2.38 |
| TC0300965 | SUMF1      | 285362 | sulfatase modifying factor 1 /// Sulfata: | 7.95E-16 | 1 | 4.75 | 5.37 | 5.76 | 5.49 | 5.33 | 5.10 | 5.04 | 4.88 |
| TC0202233 | SUMO1      | 7341   | SMT3 suppressor of mif two 3 homolog      | 7.84E-12 | 1 | 8.11 | 8.83 | 8.89 | 8.81 | 8.72 | 8.76 | 8.69 | 8.72 |
| TC1701688 | SUMO2      | 6613   | SMT3 suppressor of mif two 3 homolog      | 1.59E-08 | 1 | 8.54 | 9.06 | 9.18 | 9.22 | 9.20 | 9.10 | 9.09 | 9.08 |
| TC0X01171 | SUMO2      | 730776 | // SMT3 suppressor of mif two 3 homolog   | 2.04E-05 | 1 | 8.60 | 9.05 | 9.16 | 9.19 | 9.14 | 9.07 | 9.06 | 9.05 |
| TC2100404 | SUMO3      | 6612   | SMT3 suppressor of mif two 3 homolog      | 1.33E-13 | 1 | 4.90 | 5.98 | 5.93 | 5.98 | 6.09 | 5.93 | 5.89 | 5.72 |
| TC1101263 | SVIP_HUMAN | ---    | Small VCP/p97-interacting protein. [Sol   | 7.24E-18 | 1 | 4.52 | 6.72 | 6.70 | 6.70 | 7.06 | 7.01 | 6.75 | 6.35 |
| TC0X00067 | SYAP1      | 94056  | synapse associated protein 1, SAP47 hc    | 1.81E-08 | 1 | 6.10 | 6.76 | 6.21 | 6.17 | 6.11 | 6.19 | 6.26 | 6.28 |
| TC2000874 | SYCP2      | 10388  | synaptonemal complex protein 2            | 1.93E-11 | 1 | 2.81 | 3.08 | 3.53 | 3.61 | 3.25 | 2.98 | 3.00 | 2.80 |
| TC1700806 | SYNGR2     | 9144   | synaptogyrin 2                            | 2.26E-07 | 1 | 5.22 | 6.11 | 5.99 | 5.86 | 5.85 | 5.80 | 5.71 | 5.69 |
| TC0701538 | SYPL1      | 6856   | synaptophysin-like 1                      | 3.31E-17 | 1 | 5.33 | 6.26 | 6.23 | 6.24 | 6.38 | 6.37 | 6.31 | 6.14 |
| TC0101131 | SYT11      | 23208  | synaptotagmin XI                          | 1.71E-08 | 1 | 4.41 | 4.62 | 4.94 | 5.21 | 5.00 | 4.61 | 4.76 | 4.71 |
| TC0300993 | TADA3L     | 10474  | transcriptional adaptor 3 (NGG1 homol     | 0.000793 | 1 | 5.38 | 5.52 | 5.51 | 5.58 | 5.45 | 5.39 | 5.35 | 5.38 |
| TC0102512 | TAF13      | 6884   | TAF13 RNA polymerase II, TATA box bir     | 1.58E-09 | 1 | 6.08 | 7.10 | 7.22 | 7.26 | 7.26 | 7.02 | 7.10 | 6.90 |
| TC0500108 | TARS       | 6897   | threonyl-tRNA synthetase                  | 6.67E-05 | 1 | 3.92 | 5.10 | 4.92 | 5.04 | 5.08 | 4.93 | 4.90 | 4.73 |
| TC0700809 | TAS2R40    | 259286 | taste receptor, type 2, member 40         | 1.58E-07 | 1 | 5.50 | 6.01 | 6.43 | 6.39 | 5.87 | 5.93 | 5.74 | 5.33 |
| TC1200522 | TBC1D15    | 64786  | TBC1 domain family, member 15             | 2.65E-05 | 1 | 7.05 | 7.67 | 7.31 | 7.17 | 7.16 | 7.34 | 7.23 | 7.20 |
| TC0600956 | TBC1D7     | 51256  | TBC1 domain family, member 7 /// TBC      | 4.71E-09 | 1 | 5.07 | 5.74 | 5.79 | 5.61 | 5.67 | 5.51 | 5.44 | 5.39 |
| TC0201785 | TBC1D8     | 11138  | TBC1 domain family, member 8 (with G      | 2.18E-24 | 1 | 3.93 | 6.07 | 6.22 | 5.73 | 5.56 | 5.04 | 4.84 | 4.50 |
| TC0X00476 | TBC1D8B    | 54885  | TBC1 domain family, member 8B (with       | 6.18E-17 | 1 | 2.21 | 2.72 | 2.72 | 2.25 | 2.31 | 2.32 | 2.32 | 2.27 |
| TC0501086 | TBCA       | 6902   | tubulin folding cofactor A                | 8.90E-22 | 1 | 6.19 | 7.27 | 7.55 | 7.56 | 7.57 | 7.37 | 7.32 | 7.21 |
| TC1900469 | TBCB       | 1155   | tubulin folding cofactor B                | 1.34E-10 | 1 | 5.62 | 6.11 | 6.29 | 6.15 | 6.09 | 5.92 | 5.94 | 5.77 |

|           |                |                                                   |          |   |      |      |      |      |      |      |      |      |
|-----------|----------------|---------------------------------------------------|----------|---|------|------|------|------|------|------|------|------|
| TC0301770 | TBL1XR1        | 79718 transducin (beta)-like 1 X-linked recept    | 7.75E-09 | 1 | 7.89 | 8.29 | 8.31 | 8.01 | 8.02 | 8.02 | 7.78 | 7.84 |
| TC0701319 | TBL2           | 26608 transducin (beta)-like 2                    | 0.000259 | 1 | 4.69 | 4.78 | 4.85 | 4.84 | 4.88 | 4.77 | 4.73 | 4.74 |
| TC0701370 | tcag7.1314 /// | 54103 hypothetical protein LOC54103               | 4.86E-07 | 1 | 3.70 | 4.07 | 4.30 | 4.16 | 4.11 | 3.83 | 3.82 | 3.68 |
| TC0801037 | TCEB1          | 6921 transcription elongation factor B (SIII),    | 9.27E-10 | 1 | 7.01 | 7.51 | 7.48 | 7.39 | 7.38 | 7.36 | 7.37 | 7.31 |
| TC1500358 | TCF12          | 6938 transcription factor 12 (HTF4, helix-loo     | 2.35E-10 | 1 | 4.36 | 5.24 | 5.22 | 5.37 | 5.44 | 5.31 | 5.34 | 5.09 |
| TC1800490 | TCF4           | 6925 transcription factor 4                       | 6.28E-06 | 1 | 3.70 | 3.89 | 4.10 | 3.98 | 3.84 | 3.80 | 3.84 | 3.79 |
| TC1200688 | TCHP           | 84260 trichoplein, keratin filament binding       | 8.80E-06 | 1 | 5.92 | 6.10 | 6.28 | 6.29 | 6.23 | 6.08 | 6.07 | 6.00 |
| TC0601726 | TCP1           | 6950 t-complex 1                                  | 1.64E-06 | 1 | 6.66 | 7.38 | 7.46 | 7.31 | 7.27 | 7.27 | 7.20 | 7.11 |
| TC0301893 | TCTEX1D2 ///   | 1255758 // Tctex1 domain containing 2 ///         | 2.01E-10 | 1 | 4.07 | 4.37 | 4.66 | 4.43 | 4.34 | 4.23 | 4.10 | 4.12 |
| TC1200648 | TDG            | 6996 thymine-DNA glycosylase                      | 0.000113 | 1 | 4.59 | 4.92 | 4.95 | 4.98 | 4.91 | 4.92 | 4.97 | 4.88 |
| TC1400616 | TDRD9          | 122402 tudor domain containing 9 ///              | 4.87E-18 | 1 | 3.65 | 4.73 | 6.20 | 5.77 | 5.37 | 4.53 | 4.45 | 3.87 |
| TC1600483 | TEPP           | 374739 testis/prostate/placenta-expressed pro     | 0.000454 | 1 | 4.38 | 4.42 | 4.49 | 4.42 | 4.46 | 4.42 | 4.27 | 4.35 |
| TC0700626 | TES            | 26136 testis derived transcript (3 LIM domain:    | 1.79E-29 | 1 | 7.06 | 8.61 | 8.62 | 8.60 | 8.37 | 8.21 | 8.14 | 8.05 |
| TC1201605 | TESC           | 54997 tescalcin /// Tescalcin (TSC). [Source:Ur   | 7.93E-18 | 1 | 4.96 | 6.67 | 6.82 | 6.47 | 6.55 | 6.15 | 5.93 | 5.73 |
| TC1300295 | TFDP1          | 7027 transcription factor Dp-1                    | 2.37E-22 | 1 | 5.81 | 7.89 | 7.20 | 6.81 | 7.08 | 6.98 | 6.77 | 6.61 |
| TC0301618 | TFDP2          | 7029 transcription factor Dp-2 (E2F dimeriza      | 2.65E-10 | 1 | 5.07 | 6.57 | 5.78 | 5.78 | 6.02 | 5.98 | 5.97 | 5.78 |
| TC2100366 | TFF3           | 7033 trefoil factor 3 (intestinal) ///            | 5.09E-07 | 1 | 4.30 | 5.05 | 4.83 | 4.80 | 4.93 | 4.80 | 4.73 | 4.70 |
| TC0300447 | TFG            | 10342 TRK-fused gene                              | 2.93E-10 | 1 | 5.53 | 6.18 | 5.98 | 5.84 | 5.73 | 5.79 | 5.76 | 5.75 |
| TC0301890 | TFRC           | 7037 transferrin receptor (p90, CD71)             | 9.02E-05 | 1 | 4.37 | 5.18 | 4.54 | 4.55 | 4.60 | 4.51 | 4.57 | 4.37 |
| TC0201606 | TGFA           | 7039 transforming growth factor, alpha            | 7.64E-10 | 1 | 5.57 | 5.95 | 6.21 | 6.13 | 5.89 | 5.91 | 5.78 | 5.83 |
| TC0900430 | TGFBR1         | 7046 transforming growth factor, beta recep       | 5.22E-21 | 1 | 6.62 | 7.73 | 7.95 | 7.73 | 7.49 | 7.55 | 7.35 | 7.34 |
| TC2000236 | TGIF2 ///      | C20o 60436 /// TGFB-induced factor homeobox 2 /// | 1.30E-05 | 1 | 5.67 | 5.97 | 6.08 | 6.00 | 5.93 | 5.95 | 5.85 | 5.92 |
| TC1200519 | THAP2          | 83591 THAP domain containing, apoptosis ass       | 9.18E-10 | 1 | 3.42 | 3.99 | 4.38 | 4.33 | 4.30 | 4.08 | 4.06 | 3.88 |
| TC0800053 | THEX1          | 90459 three prime histone mRNA exonucleas         | 1.02E-14 | 1 | 4.91 | 7.03 | 6.83 | 6.42 | 6.16 | 6.12 | 6.01 | 5.83 |
| TC1901063 | TICAM1         | 148022 toll-like receptor adaptor molecule 1 //   | 1.63E-05 | 1 | 4.83 | 5.17 | 5.13 | 5.13 | 5.09 | 5.00 | 5.04 | 5.01 |
| TC0401194 | TIFA           | 92610 TRAF-interacting protein with forkhead      | 4.97E-10 | 1 | 4.88 | 6.56 | 6.78 | 6.88 | 6.53 | 6.38 | 6.31 | 6.33 |
| TC1901120 | TIMM44         | 10469 translocase of inner mitochondrial mer      | 0.00019  | 1 | 3.73 | 3.93 | 3.96 | 3.94 | 3.91 | 3.89 | 3.87 | 3.89 |
| TC1101834 | TIMM8B         | 26521 translocase of inner mitochondrial mer      | 9.24E-12 | 1 | 6.73 | 7.57 | 7.84 | 7.78 | 7.75 | 7.80 | 7.77 | 7.64 |
| TC0X00192 | TIMP1          | 7076 TIMP metalloproteinase inhibitor 1 ///       | 1.23E-09 | 1 | 5.94 | 6.71 | 6.79 | 7.02 | 6.97 | 6.67 | 6.39 | 6.42 |
| TC1400740 | TINF2          | 26277 TERF1 (TRF1)-interacting nuclear factor     | 2.10E-09 | 1 | 6.59 | 7.18 | 7.16 | 6.93 | 6.80 | 6.92 | 6.80 | 6.86 |
| TC0300736 | TIPARP         | 25976 TCDD-inducible poly(ADP-ribose) polyn       | 5.63E-15 | 1 | 6.02 | 7.15 | 7.33 | 7.07 | 6.63 | 6.52 | 6.44 | 6.39 |
| TC0101265 | TIPRL          | 261726 TIP41, TOR signaling pathway regulator     | 6.30E-14 | 1 | 6.14 | 6.93 | 7.03 | 6.87 | 6.80 | 6.96 | 6.94 | 6.92 |
| TC1100988 | TIRAP          | 114609 toll-interleukin 1 receptor (TIR) domain   | 0.000349 | 1 | 4.68 | 5.08 | 5.00 | 4.83 | 4.91 | 4.85 | 4.88 | 4.82 |
| TC1601158 | TK2            | 7084 thymidine kinase 2, mitochondrial            | 5.94E-07 | 1 | 5.67 | 6.12 | 6.04 | 6.16 | 5.97 | 5.82 | 5.72 | 5.69 |

|           |          |                                                   |          |   |      |       |       |       |      |      |      |      |
|-----------|----------|---------------------------------------------------|----------|---|------|-------|-------|-------|------|------|------|------|
| TC0901068 | TLE1     | 7088 transducin-like enhancer of split 1 (E(s     | 3.50E-05 | 1 | 3.43 | 3.74  | 3.77  | 3.70  | 3.66 | 3.60 | 3.61 | 3.61 |
| TC0900518 | TLR4     | 7099 toll-like receptor 4                         | 2.64E-07 | 1 | 9.74 | 10.35 | 10.12 | 10.02 | 9.80 | 9.94 | 9.87 | 9.93 |
| TC0103261 | TLR5     | 7100 toll-like receptor 5                         | 1.60E-21 | 1 | 5.03 | 6.64  | 7.38  | 7.25  | 6.86 | 6.63 | 6.51 | 6.06 |
| TC0X00045 | TLR8     | 51311 toll-like receptor 8 /// Toll-like receptor | 2.51E-06 | 1 | 9.22 | 9.49  | 9.74  | 9.63  | 9.25 | 9.21 | 9.18 | 9.23 |
| TC0102310 | TM2D1    | 83941 TM2 domain containing 1 /// beta-amy        | 0.00027  | 1 | 4.86 | 5.12  | 5.32  | 5.07  | 5.10 | 5.10 | 5.16 | 5.03 |
| TC0800890 | TM2D2    | 83877 TM2 domain containing 2                     | 0.00064  | 1 | 4.27 | 4.44  | 4.69  | 4.53  | 4.56 | 4.51 | 4.57 | 4.52 |
| TC0202314 | TMBIM1   | 64114 transmembrane BAX inhibitor motif co        | 0.000176 | 1 | 8.03 | 8.39  | 8.39  | 8.53  | 8.44 | 8.39 | 8.29 | 8.33 |
| TC1201367 | TMBIM4   | 51643 transmembrane BAX inhibitor motif co        | 8.28E-06 | 1 | 7.82 | 8.10  | 8.34  | 8.15  | 8.12 | 8.24 | 8.25 | 8.27 |
| TC1300294 | TMCO3    | 55002 transmembrane and coiled-coil domain        | 5.69E-19 | 1 | 5.85 | 6.57  | 6.78  | 6.66  | 6.51 | 6.29 | 6.25 | 6.08 |
| TC0102446 | TMED5    | 50999 transmembrane emp24 protein transp          | 8.26E-22 | 1 | 5.05 | 5.86  | 6.03  | 5.80  | 5.74 | 5.65 | 5.61 | 5.60 |
| TC1401018 | TMED8    | 283578 transmembrane emp24 protein transp         | 1.15E-19 | 1 | 4.59 | 5.85  | 5.91  | 5.64  | 5.53 | 5.29 | 5.28 | 5.14 |
| TC0701355 | TMEM120A | 83862 transmembrane protein 120A                  | 2.07E-10 | 1 | 6.00 | 6.69  | 6.73  | 6.45  | 6.40 | 6.30 | 6.15 | 6.21 |
| TC1400640 | TMEM121  | 80757 transmembrane protein 121                   | 0.000108 | 1 | 3.50 | 3.98  | 3.98  | 4.04  | 4.05 | 3.93 | 3.95 | 3.94 |
| TC1100719 | TMEM126B | 55863 transmembrane protein 126B /// Trans        | 1.72E-06 | 1 | 4.42 | 5.32  | 5.49  | 5.31  | 5.15 | 5.29 | 5.46 | 5.30 |
| TC0201771 | TMEM131  | 23505 transmembrane protein 131                   | 1.24E-05 | 1 | 6.34 | 6.92  | 6.90  | 6.74  | 6.51 | 6.38 | 6.53 | 6.47 |
| TC0400237 | TMEM165  | 55858 transmembrane protein 165                   | 7.56E-16 | 1 | 5.66 | 6.16  | 6.64  | 6.45  | 6.09 | 5.99 | 5.97 | 5.84 |
| TC0501119 | TMEM167A | 153339 transmembrane protein 167A                 | 1.29E-16 | 1 | 7.04 | 7.90  | 8.25  | 8.08  | 7.83 | 7.83 | 7.83 | 7.77 |
| TC0701560 | TMEM168  | 64418 transmembrane protein 168                   | 0.000938 | 1 | 4.15 | 4.40  | 4.50  | 4.27  | 4.19 | 4.23 | 4.21 | 4.09 |
| TC0201080 | TMEM169  | 92691 transmembrane protein 169                   | 8.96E-13 | 1 | 5.03 | 5.36  | 5.65  | 5.63  | 5.70 | 5.50 | 5.31 | 5.36 |
| TC0301138 | TMEM16K  | 55129 transmembrane protein 16K /// Transn        | 3.27E-19 | 1 | 4.42 | 5.45  | 5.50  | 5.50  | 5.60 | 5.13 | 4.97 | 4.81 |
| TC0600075 | TMEM170B | 1E+08 transmembrane protein 170B                  | 4.52E-22 | 1 | 5.37 | 7.32  | 7.00  | 7.00  | 7.07 | 7.01 | 6.81 | 6.55 |
| TC0501339 | TMEM173  | 340061 transmembrane protein 173                  | 0.000145 | 1 | 4.60 | 4.88  | 4.90  | 4.88  | 4.96 | 4.81 | 4.86 | 4.70 |
| TC0700886 | TMEM176A | 55365 transmembrane protein 176A                  | 1.48E-05 | 1 | 4.70 | 5.06  | 5.08  | 5.18  | 5.07 | 5.07 | 5.09 | 5.03 |
| TC0200195 | TMEM178  | 130733 transmembrane protein 178 /// Transn       | 6.53E-09 | 1 | 4.95 | 5.35  | 5.35  | 5.34  | 5.35 | 5.36 | 5.30 | 5.22 |
| TC1000540 | TMEM180  | 79847 transmembrane protein 180 /// Transn        | 2.19E-07 | 1 | 4.36 | 4.84  | 4.61  | 4.61  | 4.69 | 4.61 | 4.60 | 4.48 |
| TC0101429 | TMEM183A | 92703 transmembrane protein 183A                  | 1.05E-09 | 1 | 6.18 | 6.40  | 6.61  | 6.65  | 6.62 | 6.54 | 6.52 | 6.52 |
| TC0201861 | TMEM185B | --- Transmembrane protein 185B (Protein           | 2.57E-07 | 1 | 4.29 | 5.37  | 5.25  | 5.10  | 5.15 | 4.91 | 4.96 | 4.64 |
| TC0X00694 | TMEM187  | 8269 transmembrane protein 187                    | 0.000641 | 1 | 4.92 | 5.22  | 5.33  | 5.30  | 5.32 | 5.20 | 5.10 | 5.13 |
| TC0401379 | TMEM192  | 201931 transmembrane protein 192                  | 0.000362 | 1 | 4.10 | 4.28  | 4.36  | 4.40  | 4.28 | 4.36 | 4.38 | 4.22 |
| TC0901035 | TMEM2    | 23670 transmembrane protein 2 /// Transmer        | 4.01E-10 | 1 | 7.36 | 7.82  | 7.94  | 7.87  | 7.54 | 7.49 | 7.50 | 7.44 |
| TC0601398 | TMEM30A  | 55754 transmembrane protein 30A /// Cell cy       | 8.16E-09 | 1 | 6.15 | 6.75  | 6.79  | 6.54  | 6.51 | 6.58 | 6.48 | 6.52 |
| TC0X01284 | TMEM32   | 93380 transmembrane protein 32                    | 2.62E-20 | 1 | 5.12 | 6.56  | 6.70  | 6.24  | 6.22 | 6.26 | 6.07 | 6.02 |
| TC0400190 | TMEM33   | 55161 transmembrane protein 33                    | 2.16E-10 | 1 | 7.58 | 7.61  | 8.10  | 8.10  | 7.89 | 7.85 | 7.73 | 7.81 |
| TC1900287 | TMEM38A  | 79041 transmembrane protein 38A                   | 0.000107 | 1 | 4.15 | 4.60  | 4.40  | 4.43  | 4.49 | 4.50 | 4.34 | 4.35 |

|           |                                                                     |                                                  |                                            |          |   |      |      |      |      |      |      |      |      |
|-----------|---------------------------------------------------------------------|--------------------------------------------------|--------------------------------------------|----------|---|------|------|------|------|------|------|------|------|
| TC0100351 | TMEM39B                                                             | 55116                                            | transmembrane protein 39B /// Transn       | 1.54E-08 | 1 | 4.68 | 5.00 | 4.97 | 5.05 | 5.01 | 5.01 | 4.97 | 4.96 |
| TC1101195 | TMEM41B                                                             | 440026                                           | transmembrane protein 41B                  | 0.000331 | 1 | 4.31 | 4.77 | 4.90 | 4.63 | 4.50 | 4.60 | 4.61 | 4.53 |
| TC1200476 | TMEM5                                                               | 10329                                            | transmembrane protein 5                    | 1.13E-05 | 1 | 3.35 | 3.66 | 3.81 | 3.77 | 3.74 | 3.64 | 3.70 | 3.62 |
| TC0801109 | TMEM64                                                              | 169200                                           | transmembrane protein 64                   | 2.65E-08 | 1 | 4.14 | 4.37 | 4.52 | 4.58 | 4.50 | 4.37 | 4.28 | 4.32 |
| TC0800381 | TMEM70                                                              | 54968                                            | transmembrane protein 70                   | 1.42E-10 | 1 | 5.02 | 5.75 | 5.73 | 5.69 | 5.60 | 5.48 | 5.44 | 5.43 |
| TC0102536 | TMEM77                                                              | 128338                                           | transmembrane protein 77                   | 1.18E-07 | 1 | 4.22 | 4.79 | 5.01 | 4.64 | 4.52 | 4.60 | 4.63 | 4.53 |
| TC1500873 | TMEM87A                                                             | 25963                                            | transmembrane protein 87A /// Transn       | 5.16E-13 | 1 | 5.12 | 6.15 | 6.21 | 6.09 | 6.04 | 6.03 | 6.09 | 5.87 |
| TC0200580 | TMEM87B                                                             | 84910                                            | transmembrane protein 87B                  | 1.74E-13 | 1 | 4.16 | 5.00 | 5.34 | 5.30 | 5.24 | 5.06 | 4.93 | 4.89 |
| TC1700439 | TMEM99                                                              | 147184                                           | transmembrane protein 99                   | 3.67E-06 | 1 | 2.76 | 3.12 | 3.18 | 3.12 | 3.16 | 3.09 | 3.20 | 3.13 |
| TC1500339 | TMOD3                                                               | 29766                                            | tropomodulin 3 (ubiquitous)                | 3.99E-15 | 1 | 7.68 | 8.24 | 8.41 | 8.47 | 8.25 | 8.16 | 8.10 | 8.01 |
| TC1201072 | TMTC1                                                               | 83857                                            | transmembrane and tetratricopeptide        | 0.000105 | 1 | 3.79 | 4.83 | 5.12 | 5.27 | 4.72 | 4.29 | 4.02 | 4.22 |
| TC1200554 | TMTC2                                                               | 160335                                           | transmembrane and tetratricopeptide        | 5.58E-07 | 1 | 3.07 | 3.30 | 3.33 | 3.41 | 3.20 | 3.22 | 3.19 | 3.10 |
| TC0200784 | TNFAIP6                                                             | 7130                                             | tumor necrosis factor, alpha-induced p     | 1.92E-08 | 1 | 7.04 | 8.77 | 8.37 | 8.83 | 8.69 | 8.64 | 8.61 | 8.75 |
| TC1500956 | TNFAIP8L3                                                           | 388121                                           | tumor necrosis factor, alpha-induced p     | 0.000829 | 1 | 3.87 | 4.00 | 4.10 | 3.92 | 3.96 | 3.88 | 3.77 | 3.80 |
| TC0800801 | TNFRSF10A                                                           | 8797                                             | tumor necrosis factor receptor superfa     | 3.52E-07 | 1 | 4.61 | 5.08 | 4.93 | 4.71 | 4.79 | 4.67 | 4.70 | 4.56 |
| TC0800800 | TNFRSF10D                                                           | 8793                                             | tumor necrosis factor receptor superfa     | 1.86E-16 | 1 | 4.97 | 6.13 | 5.53 | 5.30 | 5.28 | 5.14 | 5.06 | 5.04 |
| TC2200714 | TNFRSF13C                                                           | 115650                                           | tumor necrosis factor receptor superfa     | 8.06E-05 | 1 | 5.42 | 5.75 | 5.74 | 5.78 | 5.73 | 5.83 | 5.73 | 5.66 |
| TC1700099 | TNFSF12-TNFSF107977 // TNFSF12-TNFSF13 /// tumor necrosis fa        |                                                  |                                            | 2.70E-07 | 1 | 5.79 | 6.27 | 6.22 | 6.25 | 6.18 | 6.19 | 6.21 | 6.20 |
| TC1300272 | TNFSF13B                                                            | 10673                                            | tumor necrosis factor (ligand) superfar    | 2.41E-14 | 1 | 8.20 | 9.76 | 9.52 | 9.20 | 8.88 | 9.05 | 9.00 | 9.02 |
| TC0901278 | TNFSF8                                                              | 944                                              | tumor necrosis factor (ligand) superfar    | 7.75E-09 | 1 | 4.71 | 5.76 | 4.88 | 4.62 | 4.79 | 5.16 | 5.21 | 5.29 |
| TC0400778 | TNIP2                                                               | 79155                                            | TNFAIP3 interacting protein 2              | 6.75E-08 | 1 | 5.89 | 6.38 | 6.34 | 6.30 | 6.18 | 6.25 | 6.28 | 6.17 |
| TC0100653 | TNNI3K /// FPG51086 /// TNNI3 interacting kinase /// fucose-1-p     |                                                  |                                            | 6.48E-13 | 1 | 2.56 | 2.70 | 2.85 | 2.71 | 2.67 | 2.66 | 2.64 | 2.63 |
| TC0701622 | TNPO3                                                               | 23534                                            | transportin 3 /// Transportin-3 (Transp    | 1.94E-15 | 1 | 6.13 | 7.16 | 7.18 | 6.91 | 6.83 | 6.72 | 6.64 | 6.39 |
| TC1101055 | TOLLIP                                                              | 54472                                            | toll interacting protein /// Toll-interact | 1.60E-09 | 1 | 5.45 | 5.79 | 5.94 | 5.92 | 5.92 | 5.85 | 5.78 | 5.77 |
| TC0101208 | TOMM40L                                                             | 84134                                            | translocase of outer mitochondrial mer     | 3.58E-12 | 1 | 4.17 | 4.85 | 4.70 | 4.60 | 4.72 | 4.63 | 4.41 | 4.32 |
| TC0701055 | TOMM7                                                               | 54543                                            | translocase of outer mitochondrial mer     | 1.27E-07 | 1 | 8.27 | 8.90 | 9.04 | 9.04 | 8.97 | 8.95 | 9.01 | 9.01 |
| TC0101322 | TOR1AIP1                                                            | 26092                                            | torsin A interacting protein 1 /// Torsin  | 0.000969 | 1 | 7.57 | 7.95 | 8.06 | 8.01 | 7.96 | 8.01 | 7.92 | 8.01 |
| TC0103037 | TOR1AIP2 /// II163590 // torsin A interacting protein 2 /// interfe |                                                  |                                            | 4.08E-10 | 1 | 6.38 | 6.97 | 6.99 | 7.12 | 6.92 | 6.94 | 6.77 | 6.80 |
| TC1601101 | TOX3                                                                | 27324                                            | TOX high mobility group box family me      | 0.00013  | 1 | 3.06 | 3.14 | 3.23 | 3.11 | 3.15 | 2.98 | 3.05 | 3.01 |
| TC0103265 | TP53BP2                                                             | 7159                                             | tumor protein p53 binding protein, 2       | 4.25E-06 | 1 | 5.76 | 6.25 | 6.22 | 6.38 | 6.29 | 6.21 | 6.24 | 6.09 |
| TC1101326 | TP53I11                                                             | 9537                                             | tumor protein p53 inducible protein 11     | 4.94E-16 | 1 | 5.38 | 6.03 | 6.01 | 5.84 | 5.89 | 5.76 | 5.63 | 5.63 |
| TC1700320 | TP53I13                                                             | 90313                                            | tumor protein p53 inducible protein 13     | 6.53E-06 | 1 | 4.97 | 5.18 | 5.24 | 5.23 | 5.19 | 5.20 | 5.14 | 5.15 |
| TC0201354 | TP53I3                                                              | 9540                                             | tumor protein p53 inducible protein 3 ,    | 1.35E-20 | 1 | 4.59 | 5.42 | 5.52 | 5.36 | 5.40 | 5.12 | 4.96 | 4.84 |
| TC1200065 | TPI1                                                                | 732165 // triosephosphate isomerase 1 /// Triose |                                            | 1.06E-11 | 1 | 7.12 | 7.94 | 7.82 | 8.17 | 7.99 | 7.68 | 7.73 | 7.67 |

|           |                |                                                    |          |   |      |      |      |      |      |      |      |      |
|-----------|----------------|----------------------------------------------------|----------|---|------|------|------|------|------|------|------|------|
| TC0701727 | TPK1           | 27010 thiamin pyrophosphokinase 1 /// Thian        | 1.09E-15 | 1 | 4.12 | 4.97 | 5.23 | 4.85 | 4.41 | 4.16 | 4.19 | 4.17 |
| TC0102808 | TPM3           | 7170 tropomyosin 3 /// Tropomyosin alpha-          | 5.58E-09 | 1 | 7.11 | 7.39 | 7.40 | 7.33 | 7.31 | 7.31 | 7.29 | 7.27 |
| TC1900280 | TPM4           | 7171 tropomyosin 4 /// Tropomyosin alpha-          | 1.05E-10 | 1 | 8.57 | 9.33 | 9.29 | 9.13 | 9.02 | 8.91 | 8.72 | 8.70 |
| TC0600981 | TPMT           | 7172 thiopurine S-methyltransferase                | 9.52E-09 | 1 | 3.68 | 4.54 | 4.52 | 4.43 | 4.45 | 4.40 | 4.39 | 4.11 |
| TC2200548 | TPST2          | 8459 tyrosylprotein sulfotransferase 2             | 2.60E-18 | 1 | 6.36 | 6.90 | 7.57 | 7.48 | 7.35 | 7.10 | 6.94 | 6.83 |
| TC1300448 | TPT1           | 7178 tumor protein, translationally-controlle      | 4.09E-12 | 1 | 7.15 | 7.60 | 7.70 | 7.57 | 7.64 | 7.61 | 7.52 | 7.51 |
| TC0101485 | TRAF3IP3       | 80342 TRAF3 interacting protein 3 /// TRAF3-i      | 1.52E-08 | 1 | 6.47 | 7.18 | 6.90 | 6.60 | 6.53 | 6.58 | 6.46 | 6.56 |
| TC1600075 | TRAF7          | 84231 TNF receptor-associated factor 7             | 0.000461 | 1 | 4.89 | 5.10 | 5.02 | 4.96 | 4.95 | 4.96 | 4.92 | 4.94 |
| TC0300190 | TRAK1          | 22906 trafficking protein, kinesin binding 1       | 6.53E-05 | 1 | 5.19 | 5.57 | 5.40 | 5.43 | 5.28 | 5.29 | 5.29 | 5.22 |
| TC1400808 | TRAPPC6B       | 122553 trafficking protein particle complex 6B     | 5.72E-12 | 1 | 6.63 | 7.15 | 7.30 | 7.07 | 7.02 | 7.01 | 6.91 | 6.88 |
| TC1000797 | TRDMT1         | 1787 tRNA aspartic acid methyltransferase 1        | 1.61E-06 | 1 | 3.99 | 4.24 | 4.48 | 4.66 | 4.46 | 4.36 | 4.30 | 4.34 |
| TC0601247 | TREML2         | 79865 triggering receptor expressed on myelc       | 0.000847 | 1 | 6.23 | 6.88 | 6.40 | 6.30 | 6.21 | 6.39 | 6.33 | 6.40 |
| TC0800551 | TRIB1          | 10221 tribbles homolog 1 (Drosophila)              | 5.56E-07 | 1 | 6.75 | 7.86 | 7.44 | 7.42 | 7.42 | 7.42 | 7.27 | 7.29 |
| TC1701537 | TRIM25         | 7706 tripartite motif-containing 25                | 1.82E-07 | 1 | 8.88 | 9.25 | 9.14 | 9.13 | 8.98 | 8.86 | 8.86 | 8.75 |
| TC2000540 | TRMT6          | 51605 tRNA methyltransferase 6 homolog (S.         | 4.18E-12 | 1 | 3.85 | 5.53 | 5.41 | 4.93 | 5.20 | 4.84 | 4.71 | 4.40 |
| TC0101377 | TROVE2         | 6738 TROVE domain family, member 2 /// 6C          | 1.88E-07 | 1 | 5.85 | 6.56 | 6.47 | 6.35 | 6.33 | 6.41 | 6.38 | 6.36 |
| TC2100172 | TRPM2          | 7226 transient receptor potential cation cha       | 2.36E-15 | 1 | 4.59 | 5.16 | 5.12 | 5.01 | 5.07 | 4.93 | 4.81 | 4.76 |
| TC0801204 | TRPS1          | 7227 trichorhinophalangeal syndrome I /// Z        | 3.90E-31 | 1 | 3.90 | 6.95 | 6.83 | 6.10 | 5.80 | 5.23 | 4.93 | 4.47 |
| TC1101510 | TRPT1          | 83707 tRNA phosphotransferase 1                    | 0.0005   | 1 | 4.99 | 5.31 | 5.27 | 5.26 | 5.31 | 5.27 | 5.27 | 5.22 |
| TC1700158 | TRPV2          | 51393 transient receptor potential cation cha      | 9.37E-22 | 1 | 4.88 | 6.08 | 5.93 | 5.56 | 5.50 | 5.25 | 5.28 | 5.17 |
| TC0100328 | TRSPAP1        | 54952 tRNA selenocysteine associated proteir       | 2.79E-11 | 1 | 4.72 | 5.35 | 5.42 | 5.16 | 5.15 | 5.09 | 5.09 | 4.98 |
| TC0300707 | TSC22D2        | 9819 TSC22 domain family, member 2 /// TS          | 0.000604 | 1 | 4.54 | 4.82 | 4.65 | 4.78 | 4.61 | 4.71 | 4.75 | 4.86 |
| TC0201775 | TSGA10         | 80705 testis specific, 10                          | 0.000421 | 1 | 2.77 | 2.82 | 2.86 | 2.91 | 2.90 | 2.78 | 2.79 | 2.77 |
| TC0701636 | TSGA13 /// COI | 114960 // testis specific, 13 /// coatomer protein | 1.27E-08 | 1 | 3.22 | 3.21 | 3.42 | 3.42 | 3.23 | 3.17 | 3.26 | 3.19 |
| TC1100683 | TSKU           | 25987 tsukushin                                    | 0.000121 | 1 | 4.84 | 5.01 | 5.04 | 5.06 | 5.01 | 4.98 | 4.89 | 4.91 |
| TC0101612 | TSNAX          | 7257 translin-associated factor X /// Translin     | 1.79E-09 | 1 | 5.40 | 6.26 | 6.13 | 6.05 | 5.99 | 5.91 | 5.88 | 5.85 |
| TC1000387 | TSPAN14        | 81619 tetraspanin 14 /// Tetraspanin-14 (Tsp       | 6.57E-10 | 1 | 5.98 | 6.71 | 6.62 | 6.53 | 6.46 | 6.33 | 6.29 | 6.25 |
| TC2200339 | TSPO           | 706 translocator protein (18kDa) /// Transk        | 4.77E-22 | 1 | 5.98 | 7.31 | 7.62 | 7.60 | 7.54 | 7.17 | 6.94 | 6.77 |
| TC0601551 | TSPYL4         | 23270 TSPY-like 4                                  | 4.78E-06 | 1 | 4.21 | 4.74 | 4.75 | 4.74 | 4.72 | 4.62 | 4.55 | 4.50 |
| TC1500881 | TTBK2          | 146057 tau tubulin kinase 2 /// Tau-tubulin kin    | 3.16E-10 | 1 | 4.68 | 5.12 | 4.91 | 4.75 | 4.71 | 4.76 | 4.75 | 4.75 |
| TC0103343 | TTC13          | 79573 tetratricopeptide repeat domain 13 ///       | 6.96E-07 | 1 | 4.69 | 4.79 | 4.99 | 4.84 | 4.74 | 4.54 | 4.67 | 4.52 |
| TC0500938 | TTC33          | 23548 tetratricopeptide repeat domain 33           | 1.08E-07 | 1 | 4.89 | 5.58 | 5.62 | 5.51 | 5.46 | 5.46 | 5.39 | 5.32 |
| TC0800498 | TTC35          | 9694 tetratricopeptide repeat domain 35            | 8.67E-13 | 1 | 5.81 | 7.10 | 7.25 | 7.02 | 6.75 | 6.74 | 6.72 | 6.55 |
| TC1400426 | TTC8           | 123016 tetratricopeptide repeat domain 8 /// 1     | 4.63E-05 | 1 | 2.37 | 2.51 | 2.60 | 2.49 | 2.51 | 2.42 | 2.44 | 2.39 |



|           |                                                                |                                                 |          |      |      |      |       |      |      |      |      |      |
|-----------|----------------------------------------------------------------|-------------------------------------------------|----------|------|------|------|-------|------|------|------|------|------|
| TC2200738 | TLL12                                                          | 23170 tubulin tyrosine ligase-like family, mem  | 5.58E-07 | 1    | 4.82 | 5.14 | 5.14  | 5.15 | 5.12 | 5.03 | 4.99 | 4.95 |
| TC0202333 | TUBA4A                                                         | 7277 tubulin, alpha 4a /// Tubulin alpha-4A c   | 1.49E-08 | 1    | 7.52 | 8.34 | 8.12  | 8.10 | 8.14 | 7.98 | 7.79 | 7.85 |
| TC0900724 | TUBB2C                                                         | 10383 tubulin, beta 2C                          | 2.04E-05 | 1    | 5.66 | 5.97 | 5.92  | 5.97 | 6.01 | 5.98 | 5.89 | 5.84 |
| TC1700466 | TUBG2 /// TUB 27175 /// tubulin, gamma 2 /// tubulin, gamma 1  | 5.07E-06                                        | 1        | 4.16 | 4.40 | 4.32 | 4.28  | 4.43 | 4.34 | 4.27 | 4.18 |      |
| TC1201120 | TWF1                                                           | 5756 twinfilin, actin-binding protein, homolc   | 1.20E-14 | 1    | 5.38 | 6.08 | 6.12  | 6.02 | 5.85 | 5.78 | 5.73 | 5.71 |
| TC0901237 | TXN                                                            | 7295 thioredoxin /// Thioredoxin (Trx) (ATL-c   | 2.19E-26 | 1    | 8.86 | 9.79 | 10.00 | 9.99 | 9.92 | 9.87 | 9.78 | 9.73 |
| TC1800533 | TXNDC10                                                        | 54495 thioredoxin domain containing 10          | 0.00089  | 1    | 4.17 | 4.71 | 4.98  | 4.83 | 4.76 | 4.74 | 4.85 | 4.70 |
| TC1600860 | TXNDC11                                                        | 51061 thioredoxin domain containing 11 /// T    | 2.97E-05 | 1    | 5.21 | 5.77 | 5.49  | 5.47 | 5.45 | 5.51 | 5.58 | 5.46 |
| TC0700192 | TXNDC3                                                         | 51314 thioredoxin domain containing 3 (sperr    | 1.57E-07 | 1    | 4.26 | 4.98 | 5.03  | 4.62 | 4.69 | 4.69 | 4.51 | 4.33 |
| TC1800496 | TXNL1                                                          | 9352 thioredoxin-like 1                         | 9.91E-12 | 1    | 5.56 | 6.09 | 6.27  | 6.14 | 6.10 | 6.14 | 6.08 | 6.10 |
| TC0301334 | UBA3                                                           | 9039 ubiquitin-like modifier activating enzym   | 8.89E-05 | 1    | 7.41 | 7.40 | 7.78  | 7.81 | 7.51 | 7.49 | 7.55 | 7.53 |
| TC0400995 | UBA6                                                           | 55236 ubiquitin-like modifier activating enzym  | 7.12E-14 | 1    | 4.86 | 6.42 | 6.17  | 5.63 | 5.46 | 5.48 | 5.54 | 5.34 |
| TC0900143 | UBAP1                                                          | 51271 ubiquitin associated protein 1 /// Ubiqui | 3.95E-14 | 1    | 7.55 | 8.02 | 7.94  | 7.87 | 7.81 | 7.67 | 7.50 | 7.44 |
| TC1000263 | UBE2D1                                                         | 7321 ubiquitin-conjugating enzyme E2D 1 (U      | 0.000106 | 1    | 7.93 | 8.29 | 8.48  | 8.57 | 8.43 | 8.50 | 8.39 | 8.40 |
| TC0500521 | UBE2D2                                                         | 7322 ubiquitin-conjugating enzyme E2D 2 (U      | 0.000138 | 1    | 7.83 | 8.13 | 8.21  | 8.17 | 8.14 | 8.21 | 8.18 | 8.20 |
| TC2000534 | UBE2D3                                                         | 7323 ubiquitin-conjugating enzyme E2D 3 (U      | 2.51E-06 | 1    | 7.74 | 8.10 | 8.28  | 8.06 | 8.00 | 8.15 | 8.07 | 8.12 |
| TC0201222 | UBE2F /// SCLY 140739 // ubiquitin-conjugating enzyme E2F (put | 2.33E-32                                        | 1        | 4.52 | 5.29 | 5.35 | 5.22  | 5.17 | 5.00 | 4.94 | 4.87 |      |
| TC0701628 | UBE2H                                                          | 7328 ubiquitin-conjugating enzyme E2H (UBI      | 5.21E-20 | 1    | 6.37 | 7.34 | 7.37  | 6.85 | 6.63 | 6.43 | 6.36 | 6.32 |
| TC0601451 | UBE2J1                                                         | 51465 ubiquitin-conjugating enzyme E2, J1 (U    | 3.82E-17 | 1    | 7.23 | 7.87 | 8.41  | 8.08 | 7.88 | 7.90 | 7.85 | 7.69 |
| TC0400176 | UBE2K /// HIP2                                                 | 3093 ubiquitin-conjugating enzyme E2K (UBC      | 2.71E-22 | 1    | 8.06 | 8.85 | 9.08  | 9.10 | 8.97 | 8.93 | 8.92 | 8.86 |
| TC1400244 | UBE2L3                                                         | 7332 ubiquitin-conjugating enzyme E2L 3         | 1.59E-09 | 1    | 7.25 | 8.00 | 8.05  | 8.08 | 8.09 | 8.09 | 8.03 | 8.01 |
| TC2200078 | UBE2L3                                                         | 7332 ubiquitin-conjugating enzyme E2L 3         | 1.07E-05 | 1    | 8.08 | 8.47 | 8.48  | 8.56 | 8.55 | 8.50 | 8.49 | 8.48 |
| TC0800282 | UBE2V2                                                         | 7336 ubiquitin-conjugating enzyme E2 variar     | 4.24E-05 | 1    | 6.36 | 6.71 | 6.70  | 6.73 | 6.70 | 6.75 | 6.70 | 6.70 |
| TC1500738 | UBE3A                                                          | 7337 ubiquitin protein ligase E3A (human pa     | 0.000451 | 1    | 4.06 | 4.65 | 4.67  | 4.63 | 4.66 | 4.58 | 4.66 | 4.56 |
| TC1300374 | UBL3                                                           | 5412 ubiquitin-like 3 /// Ubiquitin-like protei | 7.24E-11 | 1    | 6.06 | 6.76 | 6.91  | 6.72 | 6.57 | 6.73 | 6.77 | 6.72 |
| TC0X01386 | UBL4A                                                          | 8266 ubiquitin-like 4A /// Ubiquitin-like prot  | 0.000572 | 1    | 4.27 | 4.50 | 4.49  | 4.56 | 4.52 | 4.41 | 4.39 | 4.37 |
| TC1900164 | UBL5                                                           | 59286 ubiquitin-like 5                          | 3.72E-06 | 1    | 8.90 | 9.21 | 9.42  | 9.46 | 9.36 | 9.35 | 9.26 | 9.24 |
| TC0500655 | UBLCP1                                                         | 134510 ubiquitin-like domain containing CTD p   | 5.55E-09 | 1    | 7.28 | 8.10 | 8.29  | 8.08 | 7.93 | 8.11 | 8.08 | 8.06 |
| TC0901077 | UBQLN1                                                         | 29979 ubiquilin 1                               | 0.000324 | 1    | 7.53 | 7.74 | 7.87  | 7.86 | 7.80 | 7.73 | 7.64 | 7.68 |
| TC0X00290 | UBQLN2                                                         | 29978 ubiquilin 2                               | 1.23E-13 | 1    | 5.15 | 6.27 | 6.72  | 6.55 | 6.18 | 6.17 | 6.23 | 6.13 |
| TC0102845 | UBQLN4                                                         | 56893 ubiquilin 4 /// Ubiquilin-4 (Ataxin-1 ubi | 0.000372 | 1    | 4.79 | 4.88 | 4.92  | 4.90 | 4.88 | 4.81 | 4.77 | 4.79 |
| TC1500882 | UBR1                                                           | 197131 ubiquitin protein ligase E3 component    | 1.22E-09 | 1    | 4.43 | 5.34 | 5.01  | 4.83 | 4.73 | 4.78 | 4.88 | 4.73 |
| TC1000486 | UBTD1                                                          | 80019 ubiquitin domain containing 1             | 2.55E-05 | 1    | 5.11 | 5.49 | 5.50  | 5.50 | 5.53 | 5.48 | 5.32 | 5.40 |
| TC0501489 | UBTD2                                                          | 92181 ubiquitin domain containing 2 /// Ubiqui  | 1.04E-12 | 1    | 4.95 | 5.28 | 5.28  | 5.33 | 5.25 | 5.20 | 5.11 | 5.09 |

|           |                                                                   |        |                                           |          |   |      |      |      |      |      |      |      |      |
|-----------|-------------------------------------------------------------------|--------|-------------------------------------------|----------|---|------|------|------|------|------|------|------|------|
| TC0200740 | UBXD2                                                             | 23190  | UBX domain containing 2                   | 0.000525 | 1 | 7.56 | 7.95 | 8.00 | 7.99 | 7.85 | 7.88 | 7.87 | 7.85 |
| TC1101245 | UEVLD                                                             | 55293  | UEV and lactate/malate dehydrogenase      | 3.40E-11 | 1 | 4.83 | 5.48 | 5.65 | 5.31 | 5.13 | 5.13 | 5.09 | 4.98 |
| TC1300091 | UFM1                                                              | 51569  | ubiquitin-fold modifier 1 /// Ubiquitin-f | 0.000399 | 1 | 3.71 | 4.21 | 4.29 | 4.11 | 4.10 | 4.18 | 4.24 | 4.13 |
| TC0900485 | UGCG                                                              | 7357   | UDP-glucose ceramide glucosyltransfer     | 1.57E-26 | 1 | 5.15 | 8.45 | 8.30 | 7.83 | 8.10 | 7.72 | 7.22 | 6.62 |
| TC0200285 | UGP2                                                              | 7360   | UDP-glucose pyrophosphorylase 2           | 2.73E-20 | 1 | 6.20 | 7.03 | 7.09 | 7.03 | 6.97 | 6.88 | 6.81 | 6.73 |
| TC0101228 | UHMK1                                                             | 127933 | U2AF homology motif (UHM) kinase 1        | 1.16E-15 | 1 | 6.23 | 7.15 | 7.18 | 7.09 | 6.92 | 6.86 | 6.79 | 6.71 |
| TC0200517 | UNC50                                                             | 25972  | unc-50 homolog (C. elegans)               | 2.39E-06 | 1 | 6.35 | 6.86 | 7.06 | 6.93 | 6.90 | 6.96 | 6.95 | 6.93 |
| TC2200671 | UNC84B                                                            | 25777  | unc-84 homolog B (C. elegans)             | 2.14E-06 | 1 | 5.53 | 5.75 | 5.69 | 5.69 | 5.73 | 5.61 | 5.52 | 5.49 |
| TC2200139 | UPB1                                                              | 51733  | ureidopropionase, beta /// Beta-ureidc    | 2.67E-06 | 1 | 3.73 | 3.79 | 4.00 | 3.93 | 3.85 | 3.70 | 3.66 | 3.60 |
| TC0700239 | UPP1                                                              | 7378   | uridine phosphorylase 1                   | 2.83E-40 | 1 | 5.10 | 7.42 | 7.62 | 7.50 | 7.18 | 6.65 | 6.45 | 6.06 |
| TC0801135 | UQCRB                                                             | 7381   | ubiquinol-cytochrome c reductase bind     | 1.23E-14 | 1 | 5.55 | 6.35 | 6.56 | 6.47 | 6.37 | 6.34 | 6.36 | 6.24 |
| TC0301184 | UQCRC1                                                            | 7384   | ubiquinol-cytochrome c reductase core     | 3.06E-10 | 1 | 4.68 | 5.23 | 5.18 | 5.28 | 5.29 | 5.06 | 5.02 | 4.94 |
| TC1901375 | UQCRFS1                                                           | 7386   | ubiquinol-cytochrome c reductase, Rie     | 9.42E-12 | 1 | 5.90 | 6.75 | 6.81 | 6.70 | 6.81 | 6.59 | 6.44 | 6.37 |
| TC1001255 | USMG5                                                             | 84833  | up-regulated during skeletal muscle grc   | 2.85E-10 | 1 | 7.30 | 7.77 | 8.11 | 8.05 | 8.06 | 8.00 | 7.99 | 7.92 |
| TC1800004 | USP14                                                             | 9097   | ubiquitin specific peptidase 14 (tRNA-g   | 2.72E-08 | 1 | 3.70 | 4.41 | 4.50 | 4.42 | 4.56 | 4.32 | 4.36 | 4.17 |
| TC1200678 | USP30                                                             | 84749  | ubiquitin specific peptidase 30           | 5.70E-06 | 1 | 4.80 | 5.46 | 5.30 | 5.21 | 5.14 | 5.26 | 5.40 | 5.45 |
| TC0400563 | USP38                                                             | 84640  | ubiquitin specific peptidase 38           | 1.50E-07 | 1 | 6.18 | 6.83 | 6.80 | 6.78 | 6.49 | 6.56 | 6.47 | 6.49 |
| TC1100178 | USP47                                                             | 55031  | ubiquitin specific peptidase 47 /// Ubiq  | 3.61E-12 | 1 | 4.98 | 6.21 | 6.01 | 5.86 | 5.78 | 5.71 | 5.78 | 5.56 |
| TC0400497 | USP53                                                             | 54532  | ubiquitin specific peptidase 53           | 6.46E-15 | 1 | 3.60 | 4.62 | 3.90 | 3.77 | 3.71 | 3.75 | 3.83 | 3.74 |
| TC0Y00051 | USP9Y                                                             | 8287   | ubiquitin specific peptidase 9, Y-linked  | 3.85E-05 | 1 | 2.68 | 3.04 | 3.03 | 2.86 | 2.70 | 2.71 | 2.81 | 2.70 |
| TC1700601 | UTP18                                                             | 51096  | UTP18, small subunit (SSU) processome     | 0.000183 | 1 | 4.05 | 4.77 | 4.86 | 4.87 | 4.78 | 4.77 | 4.85 | 4.68 |
| TC0100085 | VAMP3                                                             | 9341   | vesicle-associated membrane protein 3     | 4.72E-12 | 1 | 8.10 | 8.94 | 8.91 | 8.68 | 8.73 | 8.76 | 8.61 | 8.65 |
| TC0102998 | VAMP4                                                             | 8674   | vesicle-associated membrane protein 4     | 9.14E-10 | 1 | 4.14 | 4.80 | 5.07 | 4.90 | 4.79 | 4.58 | 4.59 | 4.48 |
| TC0Y00104 | VAMP7                                                             | 6845   | vesicle-associated membrane protein 7     | 1.21E-14 | 1 | 5.33 | 6.29 | 6.37 | 6.24 | 6.16 | 6.18 | 6.06 | 6.07 |
| TC0X00724 | VAMP7 /// SYB                                                     | 6845   | vesicle-associated membrane protein 7     | 2.36E-15 | 1 | 5.76 | 6.75 | 6.81 | 6.70 | 6.63 | 6.64 | 6.56 | 6.54 |
| TC1800049 | VAPA                                                              | 9218   | VAMP (vesicle-associated membrane p       | 6.93E-18 | 1 | 7.04 | 8.06 | 8.03 | 7.97 | 7.88 | 7.84 | 7.64 | 7.63 |
| TC0601134 | VARS                                                              | 7407   | valyl-tRNA synthetase                     | 1.60E-07 | 1 | 5.51 | 5.76 | 5.82 | 5.73 | 5.77 | 5.70 | 5.62 | 5.60 |
| TC0102501 | VAV3                                                              | 10451  | vav 3 guanine nucleotide exchange fact    | 2.62E-09 | 1 | 6.44 | 7.01 | 7.28 | 7.13 | 6.94 | 6.97 | 6.97 | 6.80 |
| TC0X00717 | VBP1                                                              | 7411   | von Hippel-Lindau binding protein 1       | 1.26E-20 | 1 | 5.69 | 6.81 | 7.15 | 7.06 | 7.02 | 7.01 | 6.86 | 6.80 |
| TC0500318 | VCAN                                                              | 1462   | versican /// Versican core protein preci  | 2.23E-13 | 1 | 3.90 | 6.96 | 6.55 | 6.93 | 6.16 | 5.58 | 5.44 | 5.53 |
| TC0900887 | VCP                                                               | 7415   | valosin-containing protein /// Transitio  | 0.000743 | 1 | 6.29 | 6.66 | 6.59 | 6.54 | 6.45 | 6.41 | 6.38 | 6.37 |
| TC0301014 | VGLL4                                                             | 9686   | vestigial like 4 (Drosophila)             | 2.67E-07 | 1 | 5.28 | 5.55 | 5.47 | 5.52 | 5.50 | 5.44 | 5.31 | 5.36 |
| TC1000077 | VIM                                                               | 7431   | vimentin                                  | 1.40E-15 | 1 | 8.51 | 9.15 | 9.37 | 9.39 | 9.34 | 9.10 | 8.98 | 8.87 |
| TC2000045 | VISA /// C20orf157506 /// virus-induced signaling adapter /// chr | 57506  | virus-induced signaling adapter /// chr   | 6.29E-06 | 1 | 4.93 | 5.10 | 5.04 | 4.94 | 5.01 | 5.01 | 4.95 | 4.92 |

|           |               |                                               |          |   |      |      |      |      |      |      |      |      |
|-----------|---------------|-----------------------------------------------|----------|---|------|------|------|------|------|------|------|------|
| TC0601610 | VNN1          | 8876 vanin 1                                  | 6.74E-22 | 1 | 6.34 | 8.87 | 9.09 | 8.97 | 8.80 | 7.81 | 7.30 | 6.88 |
| TC1601072 | VPS35         | 55737 vacuolar protein sorting 35 homolog (S  | 1.82E-19 | 1 | 6.11 | 7.34 | 7.29 | 6.88 | 6.79 | 6.76 | 6.72 | 6.60 |
| TC1300511 | VPS36         | 51028 vacuolar protein sorting 36 homolog (S  | 0.000789 | 1 | 5.46 | 5.88 | 6.03 | 5.99 | 5.93 | 5.92 | 6.03 | 5.87 |
| TC0800105 | VPS37A        | 137492 vacuolar protein sorting 37 homolog A  | 3.22E-10 | 1 | 5.46 | 5.97 | 6.15 | 6.13 | 6.11 | 6.09 | 6.05 | 6.00 |
| TC0201565 | VPS54         | 51542 vacuolar protein sorting 54 homolog (S  | 3.32E-14 | 1 | 3.81 | 4.97 | 5.07 | 4.76 | 4.91 | 4.70 | 4.57 | 4.30 |
| TC1400482 | VRK1          | 7443 vaccinia related kinase 1                | 3.27E-16 | 1 | 6.37 | 7.58 | 7.97 | 8.16 | 8.18 | 7.92 | 7.60 | 7.34 |
| TC1900387 | VSTM2B        | 342865 V-set and transmembrane domain cont    | 2.02E-05 | 1 | 4.69 | 5.00 | 5.02 | 4.93 | 4.92 | 4.94 | 4.79 | 4.86 |
| TC0600771 | VTA1          | 51534 Vps20-associated 1 homolog (S. cerevis  | 4.16E-19 | 1 | 6.15 | 7.08 | 7.28 | 7.32 | 7.18 | 7.14 | 7.13 | 7.11 |
| TC1001125 | WAPAL         | 23063 wings apart-like homolog (Drosophila),  | 0.000432 | 1 | 7.61 | 7.93 | 7.81 | 7.76 | 7.62 | 7.73 | 7.77 | 7.75 |
| TC0601521 | WASF1         | 8936 WAS protein family, member 1 /// Wisl    | 5.27E-07 | 1 | 3.47 | 3.69 | 3.73 | 3.73 | 3.70 | 3.67 | 3.59 | 3.58 |
| TC1300098 | WBP4          | 11193 WW domain binding protein 4 (formin     | 1.10E-06 | 1 | 5.37 | 6.06 | 5.93 | 5.88 | 5.95 | 5.87 | 5.83 | 5.78 |
| TC0X00209 | WDR13         | 64743 WD repeat domain 13 /// WD repeat p     | 3.46E-07 | 1 | 5.10 | 5.16 | 5.22 | 5.23 | 5.17 | 5.06 | 4.99 | 4.99 |
| TC0900185 | WDR32         | 79269 WD repeat domain 32 /// WD repeat d     | 5.23E-09 | 1 | 4.53 | 5.37 | 5.08 | 5.14 | 5.25 | 5.18 | 5.07 | 4.94 |
| TC1000007 | WDR37         | 22884 WD repeat domain 37 /// WD repeat p     | 7.16E-17 | 1 | 5.56 | 6.18 | 6.35 | 6.24 | 6.07 | 5.90 | 5.80 | 5.72 |
| TC0501083 | WDR41         | 55255 WD repeat domain 41                     | 3.97E-12 | 1 | 5.22 | 6.09 | 6.29 | 6.01 | 5.88 | 5.76 | 5.79 | 5.72 |
| TC0X00520 | WDR44         | 54521 WD repeat domain 44 /// WD repeat p     | 2.99E-11 | 1 | 5.49 | 6.25 | 6.23 | 6.11 | 5.96 | 6.03 | 6.04 | 6.01 |
| TC1201436 | WDR51B /// G/ | 282809 // WD repeat domain 51B /// UDP-N-acet | 2.64E-10 | 1 | 5.33 | 5.89 | 6.13 | 6.08 | 5.97 | 5.92 | 5.82 | 5.77 |
| TC0500130 | WDR70         | 55100 WD repeat domain 70                     | 1.49E-05 | 1 | 4.16 | 4.74 | 4.86 | 4.64 | 4.61 | 4.54 | 4.53 | 4.43 |
| TC0701770 | WDR86         | 349136 WD repeat domain 86 /// WD repeat d    | 0.000721 | 1 | 4.88 | 5.02 | 5.03 | 4.95 | 4.96 | 4.95 | 4.83 | 4.90 |
| TC0202035 | WDSUB1        | 151525 WD repeat, sterile alpha motif and U-b | 1.62E-07 | 1 | 3.75 | 3.81 | 4.12 | 4.08 | 4.08 | 3.96 | 4.03 | 3.87 |
| TC1701643 | WIPI1         | 55062 WD repeat domain, phosphoinositide i    | 2.68E-08 | 1 | 6.75 | 7.13 | 7.41 | 7.39 | 7.30 | 7.08 | 7.04 | 6.91 |
| TC2200560 | XBP1          | 7494 X-box binding protein 1                  | 3.49E-11 | 1 | 4.79 | 5.87 | 5.93 | 5.52 | 5.42 | 5.33 | 5.29 | 4.99 |
| TC0X00547 | XIAP          | 331 X-linked inhibitor of apoptosis           | 0.000847 | 1 | 5.40 | 5.56 | 5.77 | 5.70 | 5.57 | 5.56 | 5.56 | 5.58 |
| TC0500317 | XRCC4         | 7518 X-ray repair complementing defective r   | 6.15E-14 | 1 | 5.96 | 6.95 | 7.25 | 6.86 | 6.58 | 6.63 | 6.65 | 6.56 |
| TC2000122 | XRN2          | 22803 5'-3' exoribonuclease 2                 | 2.66E-11 | 1 | 7.99 | 8.11 | 8.69 | 8.51 | 8.25 | 8.14 | 8.08 | 7.93 |
| TC2200481 | YDJC          | 150223 YdjC homolog (bacterial)               | 9.76E-05 | 1 | 5.09 | 5.32 | 5.32 | 5.29 | 5.29 | 5.25 | 5.16 | 5.18 |
| TC0102272 | YIPF1         | 54432 Yip1 domain family, member 1 /// Prot   | 3.65E-09 | 1 | 6.34 | 7.11 | 7.37 | 7.14 | 6.86 | 6.90 | 6.80 | 6.80 |
| TC0200158 | YIPF4         | 84272 Yip1 domain family, member 4            | 4.88E-05 | 1 | 5.32 | 5.81 | 5.91 | 5.98 | 5.87 | 5.92 | 5.81 | 5.82 |
| TC0501374 | YIPF5         | 81555 Yip1 domain family, member 5 /// Prot   | 1.58E-07 | 1 | 5.51 | 6.48 | 6.56 | 6.34 | 6.32 | 6.37 | 6.24 | 6.26 |
| TC0X00311 | YIPF6         | 286451 Yip1 domain family, member 6 /// Prot  | 0.000591 | 1 | 5.62 | 5.91 | 6.02 | 5.88 | 5.77 | 5.91 | 5.88 | 5.88 |
| TC1000838 | YME1L1        | 730922 // YME1-like 1 (S. cerevisiae)         | 1.66E-06 | 1 | 7.36 | 7.81 | 7.97 | 7.89 | 7.77 | 7.81 | 7.87 | 7.78 |
| TC0103189 | YOD1          | 55432 YOD1 OTU deubiquinating enzyme 1 hc     | 1.59E-18 | 1 | 5.53 | 6.51 | 6.17 | 5.87 | 5.81 | 5.56 | 5.48 | 5.38 |
| TC0500401 | YTHDC2        | 64848 YTH domain containing 2                 | 6.67E-11 | 1 | 4.29 | 5.07 | 5.32 | 4.84 | 4.67 | 4.61 | 4.64 | 4.43 |
| TC0800335 | YTHDF3        | 253943 YTH domain family, member 3            | 2.07E-06 | 1 | 7.69 | 8.10 | 8.06 | 8.06 | 7.96 | 8.04 | 7.91 | 7.93 |

|           |                |                                                  |          |   |      |      |      |      |      |      |      |      |
|-----------|----------------|--------------------------------------------------|----------|---|------|------|------|------|------|------|------|------|
| TC2000304 | YWHAB          | 7529 tyrosine 3-monooxygenase/tryptophan         | 7.23E-14 | 1 | 7.44 | 7.99 | 8.07 | 7.93 | 7.85 | 7.90 | 7.87 | 7.84 |
| TC1700884 | YWHAE          | 7531 tyrosine 3-monooxygenase/tryptophan         | 8.33E-10 | 1 | 7.15 | 7.74 | 7.98 | 7.95 | 8.04 | 8.01 | 7.86 | 7.75 |
| TC0701358 | YWHAG          | 7532 tyrosine 3-monooxygenase/tryptophan         | 1.94E-13 | 1 | 6.08 | 6.72 | 6.90 | 6.98 | 6.92 | 6.76 | 6.76 | 6.62 |
| TC0201301 | YWHAQ          | 10971 tyrosine 3-monooxygenase/tryptophan        | 2.59E-12 | 1 | 5.04 | 5.86 | 6.01 | 6.15 | 6.13 | 6.06 | 5.98 | 5.84 |
| TC0801161 | YWHAZ          | 7534 tyrosine 3-monooxygenase/tryptophan         | 1.22E-20 | 1 | 6.75 | 7.26 | 7.29 | 7.20 | 7.20 | 7.19 | 7.07 | 7.06 |
| TC1800550 | ZADH2          | 284273 zinc binding alcohol dehydrogenase do     | 0.00012  | 1 | 5.11 | 5.38 | 5.53 | 5.57 | 5.51 | 5.46 | 5.36 | 5.41 |
| TC0200867 | ZAK            | 51776 sterile alpha motif and leucine zipper c   | 2.92E-14 | 1 | 3.95 | 5.04 | 5.77 | 5.88 | 5.58 | 5.46 | 5.43 | 4.75 |
| TC1101207 | ZBED5          | --- Zinc finger BED domain-containing prot       | 0.000184 | 1 | 4.35 | 4.45 | 4.72 | 4.51 | 4.51 | 4.50 | 4.61 | 4.49 |
| TC0601178 | ZBTB22 /// ZBT | 9278 zinc finger and BTB domain containing       | 0.000249 | 1 | 4.64 | 5.51 | 5.20 | 5.21 | 5.20 | 5.22 | 5.16 | 5.20 |
| TC1101974 | ZBTB44         | 29068 zinc finger and BTB domain containing      | 0.000227 | 1 | 6.56 | 6.87 | 6.99 | 7.02 | 6.81 | 6.74 | 6.83 | 6.73 |
| TC1901049 | ZBTB7A         | 51341 zinc finger and BTB domain containing      | 1.40E-05 | 1 | 5.52 | 5.85 | 5.74 | 5.88 | 5.92 | 5.78 | 5.81 | 5.76 |
| TC0101108 | ZBTB7B         | 51043 zinc finger and BTB domain containing      | 0.000104 | 1 | 5.65 | 5.81 | 5.81 | 5.74 | 5.78 | 5.63 | 5.52 | 5.55 |
| TC0501281 | ZCCHC10        | 54819 zinc finger, CCHC domain containing 10     | 5.75E-05 | 1 | 4.65 | 5.42 | 5.38 | 5.45 | 5.44 | 5.40 | 5.44 | 5.32 |
| TC0102258 | ZCCHC11        | 23318 zinc finger, CCHC domain containing 11     | 0.000269 | 1 | 5.34 | 5.75 | 5.68 | 5.42 | 5.40 | 5.42 | 5.55 | 5.50 |
| TC0301891 | ZDHC19         | 131540 zinc finger, DHHC-type containing 19      | 1.45E-14 | 1 | 4.55 | 5.21 | 5.44 | 5.12 | 5.05 | 4.90 | 4.71 | 4.70 |
| TC0800104 | ZDHC2          | 51201 zinc finger, DHHC-type containing 2        | 1.52E-20 | 1 | 5.37 | 6.85 | 7.08 | 6.77 | 6.70 | 6.55 | 6.50 | 6.38 |
| TC1300332 | ZDHC20         | 253832 zinc finger, DHHC-type containing 20 //   | 2.27E-28 | 1 | 4.47 | 6.34 | 7.07 | 6.76 | 6.22 | 5.58 | 5.46 | 5.20 |
| TC0301142 | ZDHC3          | 51304 zinc finger, DHHC-type containing 3 ///    | 4.87E-29 | 1 | 4.98 | 6.28 | 6.21 | 5.94 | 5.91 | 5.68 | 5.52 | 5.52 |
| TC0201986 | ZEB2           | 9839 zinc finger E-box binding homeobox 2        | 7.65E-08 | 1 | 6.46 | 6.67 | 6.77 | 6.92 | 6.48 | 6.37 | 6.48 | 6.30 |
| TC1500875 | ZFP106         | 64397 zinc finger protein 106 homolog (mous      | 0.000776 | 1 | 7.76 | 8.03 | 8.02 | 7.96 | 7.79 | 7.67 | 7.72 | 7.67 |
| TC0500900 | ZFR            | 730732 // zinc finger RNA binding protein        | 1.24E-13 | 1 | 6.22 | 7.00 | 6.99 | 7.05 | 6.87 | 6.81 | 6.81 | 6.74 |
| TC0700531 | ZKSCAN1        | 7586 zinc finger with KRAB and SCAN domain       | 1.21E-05 | 1 | 6.36 | 6.56 | 6.47 | 6.59 | 6.58 | 6.46 | 6.40 | 6.36 |
| TC0301780 | ZMAT3          | 64393 zinc finger, matrin type 3                 | 1.80E-06 | 1 | 4.53 | 4.78 | 4.90 | 4.84 | 4.85 | 4.77 | 4.71 | 4.71 |
| TC0100384 | ZMYM1          | 79830 zinc finger, MYM-type 1 /// Zinc finger    | 0.00091  | 1 | 3.34 | 3.52 | 3.59 | 3.49 | 3.46 | 3.50 | 3.58 | 3.49 |
| TC1300316 | ZMYM5          | 9205 zinc finger, MYM-type 5 /// Zinc finger     | 1.39E-07 | 1 | 5.15 | 5.81 | 5.61 | 5.44 | 5.29 | 5.43 | 5.39 | 5.40 |
| TC1900342 | ZNF101         | 94039 zinc finger protein 101                    | 9.75E-05 | 1 | 6.29 | 6.54 | 6.25 | 6.28 | 6.29 | 6.32 | 6.38 | 6.33 |
| TC0300213 | ZNF167         | 55888 zinc finger protein 167                    | 8.98E-12 | 1 | 4.17 | 4.57 | 4.90 | 4.95 | 4.74 | 4.80 | 4.65 | 4.46 |
| TC0900443 | ZNF189         | 7743 zinc finger protein 189                     | 5.63E-05 | 1 | 5.17 | 5.56 | 5.57 | 5.31 | 5.27 | 5.29 | 5.39 | 5.31 |
| TC0300215 | ZNF197         | 10168 zinc finger protein 197 /// Zinc finger p  | 0.000943 | 1 | 4.06 | 4.32 | 4.47 | 4.41 | 4.29 | 4.24 | 4.25 | 4.19 |
| TC1600793 | ZNF200         | 7752 zinc finger protein 200                     | 0.000279 | 1 | 6.29 | 6.62 | 6.39 | 6.40 | 6.35 | 6.47 | 6.40 | 6.56 |
| TC1900599 | ZNF222         | 7673 zinc finger protein 222                     | 0.000384 | 1 | 3.58 | 4.07 | 4.27 | 4.28 | 4.03 | 4.07 | 3.97 | 4.03 |
| TC1000896 | ZNF25          | 219749 zinc finger protein 25 /// Zinc finger pr | 0.000112 | 1 | 3.74 | 3.91 | 4.14 | 4.13 | 4.01 | 3.99 | 4.11 | 3.98 |
| TC0801350 | ZNF250         | 58500 zinc finger protein 250                    | 1.32E-06 | 1 | 3.76 | 4.16 | 3.98 | 4.30 | 4.09 | 4.02 | 3.98 | 3.95 |
| TC0801352 | ZNF252         | --- Zinc finger protein 252 (Fragment). [Sol     | 3.22E-17 | 1 | 4.40 | 5.83 | 5.59 | 4.97 | 5.04 | 5.19 | 5.22 | 4.99 |

|           |                |        |                                           |          |   |      |       |       |       |       |       |      |      |
|-----------|----------------|--------|-------------------------------------------|----------|---|------|-------|-------|-------|-------|-------|------|------|
| TC1900378 | ZNF254         | 9534   | zinc finger protein 254 /// Zinc finger p | 9.59E-18 | 1 | 5.11 | 6.22  | 6.24  | 6.00  | 5.88  | 5.78  | 5.56 | 5.30 |
| TC1800140 | ZNF271         | 10778  | zinc finger protein 271                   | 3.01E-06 | 1 | 6.27 | 6.78  | 6.78  | 6.82  | 6.80  | 6.72  | 6.70 | 6.74 |
| TC0700618 | ZNF277 /// ZNF | 11179  | zinc finger protein 277 /// Zinc finger p | 3.22E-09 | 1 | 4.34 | 5.36  | 5.18  | 5.13  | 5.04  | 5.09  | 5.19 | 5.05 |
| TC1500985 | ZNF280D /// SU | 54816  | zinc finger protein 280D /// Suppressor   | 8.19E-11 | 1 | 4.22 | 5.19  | 5.23  | 5.11  | 5.30  | 5.32  | 5.25 | 5.03 |
| TC0103108 | ZNF281         | 23528  | zinc finger protein 281 /// Zinc finger p | 1.28E-11 | 1 | 6.29 | 6.97  | 6.99  | 6.86  | 6.81  | 6.73  | 6.64 | 6.66 |
| TC0700858 | ZNF282         | 8427   | zinc finger protein 282                   | 0.000258 | 1 | 4.31 | 4.46  | 4.53  | 4.46  | 4.47  | 4.30  | 4.26 | 4.18 |
| TC1601131 | ZNF319         | 57567  | zinc finger protein 319                   | 1.58E-05 | 1 | 4.67 | 5.36  | 5.28  | 5.36  | 5.30  | 5.17  | 5.08 | 4.96 |
| TC0601037 | ZNF322A        | 79692  | zinc finger protein 322A                  | 0.000303 | 1 | 3.71 | 4.20  | 4.09  | 3.91  | 3.88  | 4.14  | 4.12 | 4.16 |
| TC0901175 | ZNF322B        | 387328 | zinc finger protein 322B                  | 2.12E-07 | 1 | 3.51 | 4.09  | 4.13  | 3.69  | 3.72  | 4.01  | 4.25 | 4.10 |
| TC0400560 | ZNF330         | 27309  | zinc finger protein 330                   | 2.34E-11 | 1 | 4.10 | 4.84  | 5.05  | 5.14  | 4.94  | 4.75  | 4.81 | 4.55 |
| TC1900128 | ZNF358         | 140467 | zinc finger protein 358                   | 4.35E-05 | 1 | 4.94 | 5.54  | 5.42  | 5.55  | 5.50  | 5.47  | 5.41 | 5.38 |
| TC0501055 | ZNF366         | 167465 | zinc finger protein 366                   | 6.69E-07 | 1 | 3.78 | 3.85  | 4.27  | 4.01  | 3.92  | 3.89  | 3.97 | 3.89 |
| TC1400361 | ZNF410         | 57862  | zinc finger protein 410 /// Zinc finger p | 2.91E-09 | 1 | 5.20 | 5.79  | 5.64  | 5.60  | 5.54  | 5.61  | 5.62 | 5.59 |
| TC1901128 | ZNF414         | 84330  | zinc finger protein 414                   | 0.000569 | 1 | 5.41 | 5.57  | 5.55  | 5.45  | 5.51  | 5.46  | 5.45 | 5.42 |
| TC1901347 | ZNF43          | 7594   | zinc finger protein 43                    | 0.000617 | 1 | 4.29 | 4.68  | 4.43  | 4.37  | 4.52  | 4.50  | 4.51 | 4.41 |
| TC1000863 | ZNF438         | 220929 | zinc finger protein 438 /// Zinc finger p | 5.39E-10 | 1 | 5.91 | 6.76  | 7.16  | 6.90  | 6.58  | 6.63  | 6.47 | 6.36 |
| TC1901201 | ZNF443         | 10224  | zinc finger protein 443                   | 0.000135 | 1 | 3.92 | 4.37  | 4.37  | 4.27  | 4.14  | 4.15  | 4.03 | 4.18 |
| TC0301139 | ZNF445         | 353274 | zinc finger protein 445 /// Zinc finger p | 6.41E-13 | 1 | 5.40 | 5.84  | 5.75  | 5.61  | 5.55  | 5.41  | 5.38 | 5.36 |
| TC0701745 | ZNF467         | 168544 | zinc finger protein 467 /// Zinc finger p | 3.51E-06 | 1 | 5.98 | 6.53  | 6.58  | 6.44  | 6.35  | 6.28  | 6.13 | 6.22 |
| TC1900771 | ZNF613         | 79898  | zinc finger protein 613                   | 0.000349 | 1 | 5.71 | 5.90  | 5.99  | 5.83  | 5.77  | 5.86  | 5.85 | 5.84 |
| TC0500866 | ZNF622         | 90441  | zinc finger protein 622                   | 3.60E-11 | 1 | 6.39 | 7.16  | 7.29  | 7.40  | 7.21  | 7.24  | 7.32 | 7.25 |
| TC0102427 | ZNF644         | 84146  | zinc finger protein 644                   | 3.24E-05 | 1 | 4.61 | 4.94  | 4.94  | 4.98  | 4.92  | 4.89  | 4.93 | 4.89 |
| TC0300403 | ZNF654         | 55279  | zinc finger protein 654                   | 0.000373 | 1 | 6.11 | 6.79  | 6.68  | 6.84  | 6.53  | 6.64  | 6.79 | 6.65 |
| TC0103428 | ZNF669         | 79862  | zinc finger protein 669 /// Zinc finger p | 2.65E-06 | 1 | 4.44 | 5.02  | 4.93  | 4.80  | 4.87  | 4.94  | 5.00 | 4.99 |
| TC0101728 | ZNF672         | 79894  | zinc finger protein 672 /// Zinc finger p | 4.57E-08 | 1 | 5.67 | 6.24  | 6.12  | 6.01  | 6.01  | 6.07  | 6.01 | 5.93 |
| TC1600367 | ZNF720         | ---    | Zinc finger protein 720. [Source:Unipro   | 2.32E-07 | 1 | 3.53 | 3.68  | 3.94  | 3.76  | 3.63  | 3.67  | 3.76 | 3.80 |
| TC1500815 | ZNF770         | 54989  | zinc finger protein 770                   | 1.32E-12 | 1 | 4.77 | 5.68  | 5.74  | 5.95  | 6.07  | 5.97  | 5.71 | 5.54 |
| TC0700879 | ZNF775         | 285971 | zinc finger protein 775 /// Zinc finger p | 0.000603 | 1 | 4.21 | 4.39  | 4.43  | 4.37  | 4.37  | 4.30  | 4.32 | 4.28 |
| TC1901502 | ZNF780A        | 284323 | zinc finger protein 780A /// Zinc finger  | 2.01E-09 | 1 | 5.28 | 6.22  | 6.33  | 6.17  | 6.09  | 5.99  | 6.10 | 5.90 |
| TC1901501 | ZNF780B        | 163131 | zinc finger protein 780B                  | 3.37E-07 | 1 | 4.18 | 4.78  | 4.90  | 4.65  | 4.67  | 4.61  | 4.74 | 4.59 |
| TC1901836 | ZNF787         | 126208 | zinc finger protein 787                   | 1.67E-05 | 1 | 5.05 | 5.53  | 5.42  | 5.44  | 5.44  | 5.36  | 5.36 | 5.32 |
| TC0601556 | ZUFSP /// C6or | 221302 | zinc finger with UFM1-specific peptidas   | 1.42E-05 | 1 | 3.06 | 3.71  | 3.71  | 3.49  | 3.57  | 3.46  | 3.45 | 3.33 |
| TC1601239 | ---            | ---    | 0                                         | 0        | 1 | 4.23 | 10.86 | 10.82 | 10.62 | 10.85 | 10.51 | 9.93 | 8.93 |
| TC0900524 | ---            | ---    | 1.12E-34                                  | 1.12E-34 | 1 | 4.75 | 8.92  | 8.93  | 8.63  | 8.99  | 8.31  | 7.73 | 6.99 |

|            |     |          |   |      |       |       |       |      |      |      |      |
|------------|-----|----------|---|------|-------|-------|-------|------|------|------|------|
| TC0Xr00015 | --- | 1.84E-28 | 1 | 9.25 | 10.22 | 10.35 | 10.10 | 9.98 | 9.84 | 9.85 | 9.74 |
| TC0200179  | --- | 5.32E-28 | 1 | 3.73 | 5.93  | 5.99  | 5.56  | 5.53 | 5.09 | 5.03 | 4.76 |
| TC0Xr00016 | --- | 7.93E-26 | 1 | 7.34 | 8.25  | 8.32  | 8.11  | 7.85 | 7.80 | 7.67 | 7.61 |
| TC0100773  | --- | 2.54E-25 | 1 | 2.77 | 3.42  | 3.79  | 3.28  | 2.95 | 2.88 | 2.74 | 2.74 |
| TC0400499  | --- | 1.78E-24 | 1 | 6.03 | 7.66  | 8.05  | 7.69  | 7.56 | 7.24 | 7.09 | 6.90 |
| TC1901558  | --- | 3.96E-24 | 1 | 4.92 | 8.79  | 9.07  | 8.80  | 8.58 | 7.08 | 6.56 | 5.85 |
| TC0701714  | --- | 9.66E-24 | 1 | 6.06 | 7.44  | 7.93  | 7.70  | 7.67 | 7.43 | 7.20 | 6.93 |
| TC1101307  | --- | 1.30E-23 | 1 | 5.71 | 7.83  | 7.67  | 7.44  | 7.12 | 6.66 | 6.41 | 6.04 |
| TC1201368  | --- | 5.91E-22 | 1 | 7.23 | 8.78  | 8.65  | 8.42  | 8.28 | 7.98 | 8.04 | 7.74 |
| TC0100901  | --- | 7.26E-22 | 1 | 3.06 | 4.46  | 4.66  | 4.57  | 4.59 | 4.50 | 4.19 | 4.00 |
| TC0103351  | --- | 6.49E-21 | 1 | 6.37 | 8.18  | 8.21  | 8.20  | 7.96 | 7.88 | 7.71 | 7.73 |
| TC2200669  | --- | 2.76E-20 | 1 | 5.27 | 6.85  | 6.46  | 6.30  | 6.29 | 6.09 | 6.00 | 5.84 |
| TC1101504  | --- | 1.12E-19 | 1 | 5.86 | 7.54  | 8.00  | 7.91  | 7.70 | 7.50 | 7.28 | 6.92 |
| TC1201134  | --- | 2.31E-19 | 1 | 6.57 | 7.60  | 7.98  | 7.33  | 7.30 | 7.38 | 7.35 | 7.16 |
| TC0600959  | --- | 9.14E-19 | 1 | 7.21 | 9.05  | 9.11  | 8.77  | 8.72 | 8.68 | 8.70 | 8.43 |
| TC0901148  | --- | 1.79E-18 | 1 | 8.15 | 9.65  | 9.61  | 9.50  | 9.54 | 9.40 | 9.25 | 9.17 |
| TC1501129  | --- | 1.36E-17 | 1 | 5.07 | 7.04  | 6.68  | 6.46  | 6.59 | 6.25 | 6.06 | 5.89 |
| TC0103200  | --- | 1.96E-16 | 1 | 5.08 | 7.69  | 7.29  | 6.51  | 6.40 | 6.06 | 6.20 | 5.88 |
| TC0500240  | --- | 2.55E-16 | 1 | 6.90 | 8.60  | 9.63  | 9.15  | 8.70 | 8.33 | 8.36 | 7.57 |
| TC0700190  | --- | 3.17E-16 | 1 | 5.17 | 6.27  | 6.06  | 6.04  | 6.10 | 5.75 | 5.42 | 5.26 |
| TC1300019  | --- | 4.15E-16 | 1 | 2.86 | 3.16  | 3.38  | 3.23  | 3.09 | 2.84 | 2.86 | 2.80 |
| TC0X00364  | --- | 4.59E-16 | 1 | 6.57 | 7.73  | 7.74  | 7.45  | 7.05 | 7.11 | 6.98 | 6.92 |
| TC0100783  | --- | 2.60E-15 | 1 | 6.20 | 7.81  | 8.26  | 8.15  | 8.06 | 8.05 | 7.97 | 7.75 |
| TC1600432  | --- | 3.81E-15 | 1 | 5.84 | 6.58  | 6.63  | 6.61  | 6.55 | 6.51 | 6.43 | 6.39 |
| TC0Xr00005 | --- | 4.32E-15 | 1 | 7.23 | 8.06  | 8.14  | 7.98  | 7.76 | 7.59 | 7.42 | 7.41 |
| TC0500056  | --- | 5.35E-15 | 1 | 5.21 | 6.68  | 6.73  | 6.31  | 6.34 | 5.95 | 5.75 | 5.61 |
| TC0101741  | --- | 8.80E-15 | 1 | 7.05 | 8.88  | 9.02  | 9.23  | 9.42 | 9.17 | 9.05 | 8.81 |
| TC0600334  | --- | 7.84E-14 | 1 | 5.74 | 7.57  | 7.59  | 7.14  | 6.81 | 6.02 | 6.36 | 5.59 |
| TC0501050  | --- | 1.05E-13 | 1 | 7.26 | 8.67  | 9.43  | 9.11  | 8.53 | 8.16 | 8.03 | 7.60 |
| TC1101955  | --- | 1.12E-13 | 1 | 5.73 | 6.86  | 6.95  | 6.98  | 6.80 | 6.60 | 6.35 | 6.19 |
| TC0501049  | --- | 1.55E-13 | 1 | 5.84 | 7.23  | 8.02  | 7.61  | 7.06 | 6.82 | 6.74 | 6.33 |
| TC0300932  | --- | 3.93E-13 | 1 | 3.47 | 6.19  | 6.32  | 4.86  | 4.54 | 4.30 | 4.16 | 3.42 |
| TC1500202  | --- | 4.22E-13 | 1 | 4.98 | 6.09  | 6.38  | 6.48  | 6.74 | 6.54 | 6.21 | 6.02 |
| TC0401452  | --- | 4.93E-13 | 1 | 6.24 | 8.39  | 8.02  | 7.28  | 7.27 | 7.62 | 7.54 | 7.39 |

|            |     |          |   |      |      |      |      |      |      |      |      |
|------------|-----|----------|---|------|------|------|------|------|------|------|------|
| TC1400787  | --- | 6.83E-13 | 1 | 3.89 | 4.92 | 4.84 | 4.59 | 4.53 | 4.35 | 4.44 | 4.14 |
| TCOM00026  | --- | 8.14E-13 | 1 | 7.54 | 9.10 | 9.38 | 9.52 | 9.68 | 9.40 | 9.33 | 9.02 |
| TC0800642  | --- | 9.16E-13 | 1 | 4.29 | 5.36 | 5.07 | 4.48 | 4.42 | 4.59 | 4.56 | 4.59 |
| TC1700987  | --- | 4.47E-12 | 1 | 6.13 | 6.99 | 6.99 | 6.68 | 6.55 | 6.31 | 6.43 | 6.16 |
| TC1200649  | --- | 5.79E-12 | 1 | 6.79 | 7.48 | 7.70 | 7.72 | 7.58 | 7.44 | 7.38 | 7.33 |
| TC1300330  | --- | 7.16E-12 | 1 | 4.46 | 5.41 | 5.69 | 5.60 | 5.13 | 4.76 | 4.52 | 4.25 |
| TC2100225  | --- | 8.05E-12 | 1 | 4.38 | 5.50 | 5.56 | 5.59 | 5.72 | 5.68 | 5.59 | 5.25 |
| TC0400113  | --- | 1.06E-11 | 1 | 6.07 | 6.77 | 7.01 | 7.10 | 7.01 | 7.02 | 6.95 | 6.87 |
| TC0500738  | --- | 1.30E-11 | 1 | 4.46 | 5.08 | 5.42 | 5.29 | 5.37 | 5.10 | 4.90 | 4.54 |
| TC0300381  | --- | 1.64E-11 | 1 | 8.50 | 9.23 | 9.14 | 8.87 | 8.90 | 8.91 | 8.91 | 8.78 |
| TC1901779  | --- | 1.84E-11 | 1 | 2.49 | 3.41 | 3.55 | 3.49 | 3.33 | 3.38 | 3.31 | 3.37 |
| TC0701280  | --- | 2.86E-11 | 1 | 4.26 | 5.05 | 5.09 | 4.97 | 5.01 | 4.92 | 4.81 | 4.66 |
| TC1501267  | --- | 2.89E-11 | 1 | 3.81 | 5.07 | 5.24 | 4.95 | 4.32 | 4.45 | 4.45 | 4.06 |
| TC1600405  | --- | 2.90E-11 | 1 | 6.51 | 7.52 | 7.68 | 7.52 | 7.49 | 7.36 | 7.32 | 7.34 |
| TC0201923  | --- | 7.17E-11 | 1 | 3.14 | 3.47 | 3.46 | 3.27 | 3.26 | 3.26 | 3.19 | 3.16 |
| TC0401453  | --- | 8.26E-11 | 1 | 3.70 | 4.80 | 4.45 | 3.92 | 4.15 | 4.32 | 4.09 | 3.98 |
| TC1400001  | --- | 1.02E-10 | 1 | 4.46 | 5.40 | 5.36 | 5.06 | 4.97 | 4.88 | 4.88 | 4.74 |
| TC0701685  | --- | 1.12E-10 | 1 | 5.09 | 7.05 | 6.65 | 6.26 | 6.23 | 5.97 | 5.87 | 5.52 |
| TC0901288  | --- | 1.27E-10 | 1 | 5.08 | 6.32 | 6.61 | 6.26 | 6.40 | 6.36 | 6.42 | 6.13 |
| TC0301802  | --- | 1.31E-10 | 1 | 6.40 | 8.20 | 7.40 | 6.87 | 6.68 | 7.10 | 7.13 | 7.28 |
| TC0600464  | --- | 1.93E-10 | 1 | 5.56 | 7.03 | 7.00 | 6.57 | 6.90 | 6.37 | 6.51 | 5.79 |
| TC0100756  | --- | 2.35E-10 | 1 | 3.03 | 3.32 | 3.52 | 3.14 | 3.05 | 3.08 | 2.94 | 2.99 |
| TC0101744  | --- | 2.51E-10 | 1 | 4.83 | 6.83 | 6.98 | 6.80 | 6.99 | 7.18 | 7.04 | 6.76 |
| TC1400256  | --- | 2.85E-10 | 1 | 4.64 | 5.61 | 5.80 | 5.72 | 5.65 | 5.73 | 5.66 | 5.53 |
| TC0Xr00008 | --- | 3.03E-10 | 1 | 4.80 | 5.84 | 5.89 | 5.77 | 5.68 | 5.60 | 5.34 | 5.27 |
| TC0500066  | --- | 3.11E-10 | 1 | 5.09 | 6.36 | 6.73 | 6.32 | 6.32 | 6.54 | 6.38 | 6.03 |
| TC2200293  | --- | 3.51E-10 | 1 | 4.29 | 5.31 | 5.53 | 5.26 | 5.34 | 5.01 | 4.91 | 4.77 |
| TC0700745  | --- | 4.44E-10 | 1 | 4.46 | 6.10 | 5.81 | 5.46 | 5.12 | 5.33 | 4.76 | 4.56 |
| TC0501349  | --- | 4.78E-10 | 1 | 5.95 | 6.27 | 6.35 | 6.76 | 6.71 | 6.41 | 6.21 | 6.15 |
| TC0100772  | --- | 4.97E-10 | 1 | 4.05 | 4.90 | 4.91 | 4.40 | 4.31 | 4.20 | 4.16 | 4.08 |
| TC0300559  | --- | 5.17E-10 | 1 | 6.15 | 6.58 | 6.42 | 6.52 | 6.41 | 6.14 | 5.98 | 5.73 |
| TC1701420  | --- | 7.30E-10 | 1 | 5.68 | 6.06 | 6.17 | 6.09 | 5.99 | 5.89 | 5.88 | 5.80 |
| TC0400661  | --- | 7.44E-10 | 1 | 3.70 | 4.73 | 4.38 | 4.24 | 3.75 | 3.70 | 3.69 | 3.31 |
| TC0X00306  | --- | 7.50E-10 | 1 | 8.61 | 9.56 | 9.13 | 8.81 | 8.94 | 8.93 | 8.74 | 8.99 |

|            |        |          |   |      |       |       |       |       |       |       |       |
|------------|--------|----------|---|------|-------|-------|-------|-------|-------|-------|-------|
| TC0900046  | ---    | 7.88E-10 | 1 | 2.58 | 3.26  | 3.67  | 3.47  | 3.37  | 3.27  | 3.20  | 3.24  |
| TC0801110  | ---    | 8.38E-10 | 1 | 3.28 | 3.27  | 3.83  | 4.01  | 3.81  | 3.61  | 3.58  | 3.44  |
| TC1900181  | ---    | 8.77E-10 | 1 | 6.57 | 7.63  | 7.87  | 7.75  | 7.56  | 7.34  | 7.12  | 7.09  |
| TC1100853  | ---    | 8.82E-10 | 1 | 4.45 | 5.25  | 5.59  | 5.41  | 5.16  | 5.00  | 4.80  | 4.52  |
| TC0501051  | ---    | 9.89E-10 | 1 | 4.50 | 6.18  | 6.66  | 6.00  | 5.46  | 5.25  | 5.75  | 4.77  |
| TC1000112  | ---    | 1.01E-09 | 1 | 5.21 | 6.00  | 6.03  | 5.89  | 5.79  | 5.88  | 5.76  | 5.80  |
| TC0102200  | ---    | 1.29E-09 | 1 | 5.41 | 6.36  | 6.47  | 6.55  | 6.57  | 6.53  | 6.42  | 6.46  |
| TC1500794  | ---    | 1.59E-09 | 1 | 5.87 | 6.95  | 7.31  | 7.16  | 7.10  | 7.04  | 6.91  | 6.67  |
| TC0201924  | ---    | 1.60E-09 | 1 | 6.32 | 6.99  | 7.09  | 7.00  | 7.06  | 7.02  | 6.84  | 6.78  |
| TC0600618  | ---    | 1.62E-09 | 1 | 4.30 | 6.79  | 6.45  | 6.24  | 6.03  | 5.81  | 5.92  | 5.16  |
| TC0501519  | ---    | 1.98E-09 | 1 | 4.43 | 5.80  | 6.34  | 6.37  | 6.12  | 6.00  | 5.60  | 5.30  |
| TC0400891  | ---    | 2.30E-09 | 1 | 9.47 | 10.10 | 10.29 | 10.28 | 10.31 | 10.15 | 10.19 | 10.07 |
| TC0501023  | ---    | 3.26E-09 | 1 | 4.09 | 5.81  | 5.23  | 4.48  | 4.50  | 4.88  | 4.86  | 4.92  |
| TC0701644  | ---    | 3.31E-09 | 1 | 4.62 | 5.37  | 5.61  | 5.37  | 5.41  | 5.24  | 5.19  | 4.98  |
| TC2200527  | ---    | 3.75E-09 | 1 | 5.00 | 6.10  | 6.05  | 6.21  | 5.87  | 5.57  | 5.50  | 5.48  |
| TC1000749  | ---    | 4.01E-09 | 1 | 6.28 | 7.55  | 7.15  | 6.91  | 6.93  | 6.49  | 6.31  | 5.89  |
| TC1501131  | ---    | 4.03E-09 | 1 | 5.21 | 5.94  | 5.92  | 5.95  | 5.90  | 5.77  | 5.44  | 5.56  |
| TC0600617  | ---    | 4.43E-09 | 1 | 6.32 | 7.59  | 7.53  | 7.16  | 6.92  | 6.74  | 6.77  | 6.42  |
| TC1400165  | ---    | 5.06E-09 | 1 | 5.77 | 6.52  | 6.62  | 6.64  | 6.44  | 6.50  | 6.60  | 6.57  |
| TC0900762  | ---    | 9.90E-09 | 1 | 6.90 | 8.09  | 8.32  | 8.17  | 8.35  | 8.37  | 8.28  | 8.08  |
| TC0X00858  | ---    | 1.05E-08 | 1 | 8.48 | 9.61  | 9.55  | 9.57  | 9.62  | 9.64  | 9.70  | 9.50  |
| TC1200526  | ---    | 1.05E-08 | 1 | 6.15 | 6.87  | 7.18  | 7.04  | 6.96  | 6.99  | 7.05  | 6.87  |
| TC0601208  | ---    | 1.05E-08 | 1 | 7.39 | 8.00  | 7.78  | 7.69  | 7.58  | 7.33  | 7.22  | 6.85  |
| TC10r00001 | ---    | 1.07E-08 | 1 | 5.34 | 5.92  | 6.27  | 6.32  | 6.10  | 5.98  | 6.07  | 5.87  |
| TC0701718  | ---    | 1.49E-08 | 1 | 5.17 | 5.37  | 5.34  | 5.30  | 5.22  | 5.14  | 5.15  | 5.11  |
| TC1401152  | ---    | 1.53E-08 | 1 | 2.94 | 3.50  | 3.97  | 3.89  | 3.65  | 3.45  | 3.24  | 3.12  |
| TC0100894  | ---    | 1.55E-08 | 1 | 4.27 | 5.15  | 5.24  | 5.22  | 5.17  | 4.99  | 4.93  | 4.94  |
| TC0202265  | ---    | 2.63E-08 | 1 | 3.31 | 4.63  | 3.93  | 3.61  | 3.50  | 3.71  | 3.83  | 3.88  |
| TC0100856  | ---    | 3.01E-08 | 1 | 2.74 | 4.37  | 4.13  | 3.84  | 3.97  | 3.90  | 3.86  | 3.63  |
| TC0700769  | ---    | 3.51E-08 | 1 | 4.19 | 3.88  | 4.62  | 4.71  | 4.53  | 4.07  | 4.01  | 3.79  |
| TC0200407  | ---    | 3.57E-08 | 1 | 5.53 | 5.98  | 6.01  | 5.86  | 5.90  | 5.75  | 5.66  | 5.63  |
| TC0400262  | ---    | 3.62E-08 | 1 | 4.94 | 5.97  | 6.06  | 5.83  | 5.85  | 5.84  | 5.71  | 5.62  |
| TC1300302  | ---    | 3.76E-08 | 1 | 5.71 | 6.48  | 6.61  | 6.78  | 6.77  | 6.71  | 6.50  | 6.52  |
| TC0201818  | 652842 | 3.77E-08 | 1 | 4.62 | 5.37  | 5.23  | 5.20  | 5.29  | 5.24  | 5.10  | 5.06  |



|            |        |          |   |      |       |       |       |       |       |       |       |
|------------|--------|----------|---|------|-------|-------|-------|-------|-------|-------|-------|
| TC0500142  | ---    | 3.81E-08 | 1 | 5.28 | 5.61  | 5.72  | 5.87  | 5.82  | 5.73  | 5.72  | 5.59  |
| TC0Xr00006 | ---    | 3.81E-08 | 1 | 6.46 | 7.47  | 7.29  | 7.06  | 6.99  | 6.96  | 7.10  | 7.00  |
| TC1900981  | ---    | 3.83E-08 | 1 | 4.64 | 5.16  | 5.17  | 4.97  | 5.11  | 4.96  | 4.84  | 4.81  |
| TC0400412  | ---    | 4.21E-08 | 1 | 7.27 | 7.92  | 8.10  | 7.89  | 7.90  | 7.86  | 7.86  | 7.81  |
| TC0100385  | ---    | 4.33E-08 | 1 | 9.15 | 10.12 | 10.12 | 10.16 | 10.13 | 10.18 | 10.18 | 10.03 |
| TC0201595  | ---    | 5.10E-08 | 1 | 4.16 | 4.58  | 4.65  | 4.69  | 4.71  | 4.56  | 4.55  | 4.46  |
| TC2200284  | ---    | 5.84E-08 | 1 | 3.30 | 3.91  | 3.91  | 3.56  | 3.83  | 3.39  | 3.30  | 3.18  |
| TC0X00876  | ---    | 1.10E-07 | 1 | 2.25 | 3.46  | 3.43  | 2.68  | 2.84  | 2.86  | 2.66  | 2.63  |
| TC0400132  | ---    | 1.25E-07 | 1 | 9.59 | 10.00 | 10.21 | 10.04 | 10.04 | 10.09 | 9.99  | 10.04 |
| TC1200364  | ---    | 1.35E-07 | 1 | 5.12 | 5.56  | 6.01  | 5.75  | 5.57  | 5.59  | 5.55  | 5.48  |
| TC1000006  | ---    | 1.40E-07 | 1 | 4.62 | 5.06  | 5.06  | 4.73  | 4.70  | 4.73  | 4.77  | 4.72  |
| TCOM00029  | ---    | 1.51E-07 | 1 | 7.22 | 8.71  | 8.90  | 8.63  | 8.88  | 8.96  | 8.80  | 8.65  |
| TC1600247  | ---    | 1.86E-07 | 1 | 4.91 | 6.22  | 6.36  | 5.98  | 5.72  | 5.67  | 5.58  | 5.25  |
| TC0100971  | ---    | 1.90E-07 | 1 | 5.21 | 5.62  | 5.79  | 5.84  | 5.69  | 5.47  | 5.56  | 5.55  |
| TC1500147  | ---    | 2.11E-07 | 1 | 3.97 | 4.79  | 5.06  | 4.94  | 4.93  | 4.78  | 4.69  | 4.59  |
| TC1500503  | ---    | 2.38E-07 | 1 | 9.18 | 10.20 | 9.99  | 9.98  | 10.13 | 10.11 | 9.97  | 9.81  |
| TC1100222  | ---    | 2.75E-07 | 1 | 3.70 | 3.72  | 4.07  | 3.79  | 3.71  | 3.67  | 3.66  | 3.54  |
| TC0201906  | ---    | 3.16E-07 | 1 | 3.60 | 4.55  | 4.77  | 4.75  | 5.03  | 4.84  | 4.67  | 4.49  |
| TC0401407  | ---    | 6.07E-07 | 1 | 3.42 | 4.15  | 4.05  | 4.03  | 3.99  | 3.86  | 3.78  | 3.79  |
| TC1101277  | ---    | 6.28E-07 | 1 | 2.10 | 2.80  | 2.77  | 2.62  | 2.67  | 2.68  | 2.67  | 2.56  |
| TC0200851  | 731061 | 8.12E-07 | 1 | 2.80 | 3.45  | 3.58  | 3.41  | 3.50  | 3.51  | 3.50  | 3.43  |
| TC0700595  | ---    | 9.67E-07 | 1 | 3.75 | 4.61  | 3.84  | 3.88  | 3.99  | 3.91  | 3.73  | 3.68  |
| TC0501045  | ---    | 1.18E-06 | 1 | 6.59 | 7.06  | 7.63  | 7.34  | 7.14  | 6.87  | 6.86  | 6.40  |
| TC0301664  | ---    | 1.38E-06 | 1 | 2.60 | 2.88  | 3.25  | 3.60  | 3.58  | 3.23  | 3.07  | 2.75  |
| TC1101001  | ---    | 1.57E-06 | 1 | 4.55 | 5.01  | 5.25  | 5.36  | 5.35  | 5.25  | 4.96  | 4.80  |
| TC1300309  | ---    | 1.65E-06 | 1 | 6.01 | 6.80  | 6.64  | 6.47  | 6.54  | 6.25  | 6.30  | 6.16  |
| TC0200830  | ---    | 1.73E-06 | 1 | 3.13 | 3.54  | 3.58  | 3.61  | 3.63  | 3.60  | 3.49  | 3.40  |
| TC1200375  | ---    | 1.93E-06 | 1 | 6.08 | 6.66  | 6.70  | 6.81  | 6.67  | 6.58  | 6.57  | 6.42  |
| TC1600246  | ---    | 1.99E-06 | 1 | 6.96 | 7.82  | 7.74  | 7.56  | 7.27  | 7.22  | 7.21  | 6.99  |
| TC2200051  | ---    | 2.32E-06 | 1 | 4.93 | 5.42  | 5.45  | 5.54  | 5.52  | 5.08  | 5.05  | 5.06  |
| TC0800295  | ---    | 2.37E-06 | 1 | 4.92 | 5.47  | 5.80  | 5.67  | 5.46  | 5.29  | 5.32  | 5.29  |
| TC1500203  | ---    | 2.64E-06 | 1 | 5.16 | 5.87  | 5.65  | 5.70  | 5.53  | 5.67  | 5.53  | 5.54  |
| TC0X00472  | ---    | 2.83E-06 | 1 | 2.24 | 2.47  | 2.77  | 2.55  | 2.43  | 2.41  | 2.39  | 2.20  |
| TC1000737  | ---    | 2.96E-06 | 1 | 2.72 | 2.97  | 3.52  | 3.50  | 3.16  | 3.19  | 2.94  | 3.00  |

|            |        |          |   |      |      |      |      |      |      |      |      |
|------------|--------|----------|---|------|------|------|------|------|------|------|------|
| TC0200333  | ---    | 3.44E-06 | 1 | 3.33 | 4.06 | 4.38 | 3.94 | 4.08 | 3.96 | 3.87 | 3.77 |
| TC1000873  | ---    | 3.46E-06 | 1 | 5.27 | 6.15 | 6.34 | 6.23 | 5.98 | 6.12 | 6.17 | 6.07 |
| TC0200553  | ---    | 3.56E-06 | 1 | 5.39 | 5.71 | 5.70 | 5.65 | 5.69 | 5.73 | 5.59 | 5.58 |
| TC1300478  | ---    | 3.92E-06 | 1 | 3.65 | 4.85 | 4.57 | 4.28 | 4.50 | 4.45 | 4.20 | 4.08 |
| TC0800603  | ---    | 4.13E-06 | 1 | 4.43 | 5.36 | 5.32 | 4.93 | 4.72 | 4.71 | 4.63 | 4.61 |
| TC0400466  | ---    | 4.13E-06 | 1 | 5.70 | 6.95 | 7.54 | 7.52 | 7.21 | 6.99 | 6.99 | 6.93 |
| TC0X00611  | ---    | 5.28E-06 | 1 | 5.96 | 6.56 | 6.48 | 6.29 | 6.31 | 6.39 | 6.36 | 6.28 |
| TC1500355  | ---    | 5.67E-06 | 1 | 2.68 | 3.13 | 3.49 | 3.70 | 3.37 | 3.18 | 3.16 | 3.08 |
| TC0600685  | ---    | 6.41E-06 | 1 | 5.57 | 6.36 | 6.46 | 6.53 | 6.56 | 6.38 | 6.12 | 6.21 |
| TC0500872  | ---    | 6.79E-06 | 1 | 4.28 | 4.71 | 4.80 | 4.67 | 4.60 | 4.62 | 4.45 | 4.32 |
| TC1500539  | ---    | 6.88E-06 | 1 | 3.53 | 4.41 | 4.43 | 4.04 | 4.12 | 4.04 | 3.84 | 4.02 |
| TC1201540  | ---    | 6.93E-06 | 1 | 3.73 | 4.60 | 5.19 | 5.16 | 4.95 | 4.45 | 4.76 | 4.19 |
| TC0400852  | ---    | 7.06E-06 | 1 | 8.49 | 9.03 | 9.11 | 8.98 | 8.97 | 9.06 | 8.95 | 8.92 |
| TC1500252  | ---    | 7.72E-06 | 1 | 5.71 | 6.33 | 6.37 | 6.43 | 6.57 | 6.38 | 6.36 | 6.18 |
| TC0500027  | ---    | 8.68E-06 | 1 | 4.88 | 5.63 | 5.78 | 5.29 | 5.11 | 5.22 | 5.38 | 5.50 |
| TC0201943  | ---    | 9.13E-06 | 1 | 5.14 | 5.57 | 5.70 | 5.53 | 5.52 | 5.45 | 5.36 | 5.50 |
| TC0700768  | ---    | 9.74E-06 | 1 | 7.61 | 7.94 | 8.20 | 7.95 | 7.79 | 7.51 | 7.38 | 7.18 |
| TC0700417  | ---    | 1.17E-05 | 1 | 5.37 | 5.70 | 5.68 | 5.73 | 5.71 | 5.78 | 5.61 | 5.63 |
| TC0100991  | 644410 | 1.19E-05 | 1 | 7.27 | 8.61 | 8.87 | 8.89 | 8.56 | 8.87 | 8.84 | 8.67 |
| TC1701188  | ---    | 1.30E-05 | 1 | 4.49 | 4.98 | 5.10 | 4.96 | 4.72 | 4.80 | 4.80 | 4.55 |
| TC15r00011 | ---    | 1.32E-05 | 1 | 4.41 | 4.70 | 4.81 | 4.69 | 4.77 | 4.78 | 4.71 | 4.71 |
| TC0500839  | ---    | 1.36E-05 | 1 | 4.12 | 4.56 | 4.57 | 4.55 | 4.71 | 4.48 | 4.33 | 4.44 |
| TC0401098  | ---    | 1.49E-05 | 1 | 3.87 | 4.95 | 4.50 | 4.46 | 4.18 | 4.17 | 4.18 | 3.98 |
| TC1001044  | ---    | 1.55E-05 | 1 | 5.51 | 6.02 | 6.20 | 6.14 | 6.08 | 5.93 | 5.86 | 5.76 |
| TC0401070  | ---    | 1.70E-05 | 1 | 1.98 | 2.25 | 2.66 | 2.16 | 2.23 | 2.03 | 1.86 | 1.94 |
| TC1400765  | ---    | 1.82E-05 | 1 | 2.26 | 2.19 | 2.49 | 2.34 | 2.35 | 2.17 | 2.21 | 2.26 |
| TC0101748  | ---    | 1.99E-05 | 1 | 5.49 | 5.25 | 5.88 | 5.92 | 5.67 | 5.40 | 5.18 | 4.81 |
| TC0200778  | 727742 | 2.19E-05 | 1 | 3.05 | 3.18 | 3.16 | 3.05 | 3.06 | 3.04 | 3.05 | 3.09 |
| TC1400591  | ---    | 2.27E-05 | 1 | 3.94 | 4.63 | 4.93 | 4.77 | 4.71 | 4.57 | 4.43 | 4.29 |
| TC0600909  | ---    | 2.29E-05 | 1 | 3.93 | 4.84 | 4.25 | 3.78 | 3.91 | 4.25 | 4.41 | 4.21 |
| TC0500241  | ---    | 2.29E-05 | 1 | 4.65 | 5.43 | 6.17 | 5.80 | 5.54 | 5.25 | 5.37 | 4.94 |
| TC0301120  | ---    | 2.34E-05 | 1 | 4.06 | 4.19 | 4.48 | 4.45 | 4.35 | 4.31 | 4.16 | 4.23 |
| TC0Y00013  | ---    | 2.37E-05 | 1 | 7.09 | 7.82 | 7.84 | 7.85 | 7.85 | 7.78 | 7.65 | 7.51 |
| TC0300662  | ---    | 2.60E-05 | 1 | 3.71 | 3.97 | 4.17 | 3.94 | 3.88 | 3.91 | 3.96 | 3.92 |

|           |     |          |   |       |       |       |       |       |       |       |       |
|-----------|-----|----------|---|-------|-------|-------|-------|-------|-------|-------|-------|
| TC0300332 | --- | 2.60E-05 | 1 | 4.96  | 5.71  | 5.50  | 5.57  | 5.51  | 5.69  | 5.64  | 5.52  |
| TC0900618 | --- | 2.83E-05 | 1 | 4.57  | 4.68  | 5.27  | 5.20  | 4.96  | 5.04  | 5.03  | 4.73  |
| TC1100713 | --- | 2.97E-05 | 1 | 5.69  | 6.40  | 6.24  | 6.08  | 6.30  | 6.22  | 6.33  | 6.18  |
| TC0101650 | --- | 3.09E-05 | 1 | 6.33  | 6.84  | 6.88  | 6.86  | 6.82  | 6.83  | 6.57  | 6.60  |
| TC0700205 | --- | 3.26E-05 | 1 | 2.42  | 2.81  | 2.90  | 2.81  | 2.66  | 2.66  | 2.67  | 2.61  |
| TC1500148 | --- | 3.78E-05 | 1 | 5.29  | 6.07  | 6.41  | 6.17  | 6.14  | 6.09  | 6.02  | 5.77  |
| TC1701578 | --- | 4.00E-05 | 1 | 2.83  | 3.83  | 3.77  | 3.61  | 3.68  | 3.73  | 3.47  | 3.51  |
| TC1201455 | --- | 4.27E-05 | 1 | 6.54  | 7.29  | 7.33  | 7.63  | 7.35  | 7.23  | 6.97  | 7.01  |
| TC2100107 | --- | 4.44E-05 | 1 | 4.92  | 5.24  | 5.38  | 5.24  | 5.36  | 5.20  | 5.20  | 5.02  |
| TC0401156 | --- | 4.70E-05 | 1 | 4.34  | 4.54  | 4.82  | 4.86  | 4.72  | 4.51  | 4.44  | 4.44  |
| TC1100216 | --- | 4.82E-05 | 1 | 3.97  | 4.58  | 4.45  | 4.40  | 4.52  | 4.41  | 4.44  | 4.53  |
| TC0201962 | --- | 5.56E-05 | 1 | 6.04  | 6.49  | 6.62  | 6.48  | 6.60  | 6.54  | 6.43  | 6.43  |
| TC0300964 | --- | 5.89E-05 | 1 | 3.80  | 4.17  | 4.53  | 4.50  | 4.27  | 4.20  | 4.05  | 3.96  |
| TC1800304 | --- | 5.90E-05 | 1 | 2.98  | 3.33  | 3.66  | 3.54  | 3.45  | 3.60  | 3.35  | 3.30  |
| TC0401381 | --- | 6.14E-05 | 1 | 1.75  | 2.18  | 2.15  | 1.88  | 1.89  | 1.87  | 1.79  | 1.86  |
| TC0301658 | --- | 6.43E-05 | 1 | 5.01  | 5.51  | 5.79  | 5.78  | 5.69  | 5.62  | 5.65  | 5.59  |
| TC0501200 | --- | 7.05E-05 | 1 | 2.94  | 3.54  | 4.10  | 3.56  | 3.88  | 3.49  | 3.61  | 3.40  |
| TC1500648 | --- | 7.12E-05 | 1 | 4.99  | 6.16  | 5.81  | 5.17  | 5.03  | 5.07  | 5.21  | 5.04  |
| TC1901499 | --- | 7.43E-05 | 1 | 6.53  | 7.42  | 7.33  | 7.29  | 7.26  | 7.28  | 6.97  | 7.17  |
| TC1900405 | --- | 7.43E-05 | 1 | 4.38  | 4.84  | 4.81  | 4.86  | 5.07  | 4.88  | 4.80  | 4.72  |
| TC0300712 | --- | 7.95E-05 | 1 | 3.30  | 3.49  | 3.67  | 3.72  | 3.78  | 3.60  | 3.47  | 3.46  |
| TC0X00810 | --- | 8.27E-05 | 1 | 5.77  | 6.63  | 6.88  | 6.95  | 6.94  | 6.93  | 6.71  | 6.58  |
| TC0100025 | --- | 8.34E-05 | 1 | 5.02  | 5.36  | 5.29  | 5.36  | 5.36  | 5.29  | 5.07  | 5.20  |
| TC1500016 | --- | 8.34E-05 | 1 | 4.40  | 4.98  | 5.02  | 4.97  | 4.89  | 4.95  | 4.93  | 4.87  |
| TC0700837 | --- | 8.47E-05 | 1 | 3.46  | 3.81  | 3.81  | 3.76  | 3.83  | 3.78  | 3.76  | 3.65  |
| TC0800891 | --- | 8.73E-05 | 1 | 2.02  | 2.69  | 2.56  | 2.35  | 2.40  | 2.03  | 2.17  | 2.07  |
| TC0103418 | --- | 9.02E-05 | 1 | 4.31  | 4.54  | 4.78  | 4.71  | 4.65  | 4.63  | 4.58  | 4.50  |
| TC0500246 | --- | 9.46E-05 | 1 | 4.76  | 5.20  | 5.67  | 5.45  | 5.21  | 4.92  | 4.96  | 4.57  |
| TC0X00399 | --- | 0.000113 | 1 | 11.35 | 11.81 | 11.84 | 11.89 | 11.89 | 11.79 | 11.73 | 11.64 |
| TC0X00886 | --- | 0.000114 | 1 | 3.92  | 4.59  | 4.65  | 4.75  | 4.71  | 4.67  | 4.72  | 4.51  |
| TC2000141 | --- | 0.000123 | 1 | 2.72  | 3.51  | 3.34  | 3.35  | 3.27  | 3.38  | 2.88  | 2.82  |
| TC1800283 | --- | 0.000128 | 1 | 9.04  | 9.40  | 9.47  | 9.55  | 9.58  | 9.40  | 9.27  | 9.29  |
| TC0800970 | --- | 0.000141 | 1 | 2.46  | 2.94  | 2.94  | 2.80  | 2.60  | 2.51  | 2.43  | 2.32  |
| TC1300063 | --- | 0.000146 | 1 | 5.65  | 6.26  | 6.29  | 6.23  | 6.25  | 6.25  | 6.27  | 6.26  |

|            |        |          |   |      |      |      |      |      |      |      |      |
|------------|--------|----------|---|------|------|------|------|------|------|------|------|
| TC0200577  | ---    | 0.000155 | 1 | 6.87 | 7.44 | 7.53 | 7.45 | 7.33 | 7.44 | 7.40 | 7.26 |
| TC1300479  | ---    | 0.000155 | 1 | 4.92 | 6.12 | 5.84 | 5.47 | 5.40 | 5.11 | 5.45 | 5.24 |
| TC0701724  | 730421 | 0.000163 | 1 | 3.11 | 3.42 | 3.29 | 3.23 | 3.39 | 3.35 | 3.35 | 3.25 |
| TC2000692  | ---    | 0.000165 | 1 | 5.58 | 5.93 | 5.97 | 6.05 | 6.00 | 5.98 | 5.90 | 5.93 |
| TC15r00017 | ---    | 0.00017  | 1 | 6.43 | 6.91 | 6.90 | 6.77 | 6.68 | 6.75 | 6.71 | 6.72 |
| TC0800324  | ---    | 0.000185 | 1 | 8.25 | 8.63 | 8.65 | 8.46 | 8.37 | 8.41 | 8.37 | 8.39 |
| TC0701686  | ---    | 0.000185 | 1 | 5.44 | 6.07 | 5.75 | 5.68 | 5.57 | 5.53 | 5.63 | 5.25 |
| TC0800077  | ---    | 0.000197 | 1 | 2.59 | 3.32 | 3.52 | 3.24 | 3.13 | 2.99 | 3.06 | 3.07 |
| TC0X00515  | ---    | 0.000197 | 1 | 3.32 | 3.82 | 3.81 | 3.64 | 3.49 | 3.40 | 3.35 | 3.59 |
| TC1400234  | ---    | 0.000217 | 1 | 2.70 | 2.97 | 3.28 | 2.95 | 2.97 | 3.00 | 2.83 | 2.88 |
| TC0601008  | ---    | 0.000227 | 1 | 4.44 | 5.29 | 5.34 | 4.99 | 5.29 | 5.07 | 4.79 | 4.80 |
| TC0301467  | ---    | 0.000235 | 1 | 7.80 | 8.38 | 8.25 | 8.26 | 8.20 | 8.26 | 8.28 | 8.35 |
| TC0101798  | ---    | 0.000235 | 1 | 5.26 | 5.53 | 5.55 | 5.43 | 5.46 | 5.46 | 5.34 | 5.30 |
| TC0400784  | ---    | 0.000271 | 1 | 3.39 | 3.95 | 4.27 | 3.82 | 3.88 | 3.71 | 3.75 | 3.85 |
| TC0600432  | ---    | 0.000275 | 1 | 3.47 | 3.90 | 3.80 | 3.68 | 3.76 | 3.56 | 3.56 | 3.39 |
| TC0600662  | ---    | 0.000276 | 1 | 3.58 | 3.67 | 4.01 | 3.74 | 3.69 | 3.57 | 3.59 | 3.46 |
| TC0500676  | ---    | 0.000284 | 1 | 2.49 | 2.73 | 2.78 | 2.50 | 2.48 | 2.39 | 2.63 | 2.49 |
| TC0200737  | ---    | 0.000289 | 1 | 2.98 | 3.46 | 3.52 | 3.23 | 3.10 | 2.85 | 2.92 | 2.80 |
| TC0201746  | ---    | 0.000293 | 1 | 4.60 | 4.99 | 5.22 | 5.04 | 5.08 | 5.01 | 4.90 | 4.71 |
| TC0100026  | ---    | 0.000296 | 1 | 4.51 | 4.79 | 4.99 | 4.83 | 4.79 | 4.67 | 4.60 | 4.64 |
| TC0301436  | ---    | 0.000306 | 1 | 4.46 | 4.78 | 4.99 | 4.76 | 4.76 | 5.02 | 4.71 | 4.84 |
| TC0100461  | ---    | 0.000312 | 1 | 3.04 | 4.13 | 3.54 | 3.38 | 3.47 | 3.75 | 3.59 | 3.55 |
| TC0601408  | ---    | 0.000322 | 1 | 4.73 | 5.37 | 5.53 | 5.42 | 5.30 | 5.48 | 5.48 | 5.29 |
| TC1101049  | ---    | 0.000325 | 1 | 4.99 | 5.48 | 5.44 | 5.44 | 5.49 | 5.35 | 5.32 | 5.19 |
| TC0401262  | ---    | 0.000345 | 1 | 1.76 | 2.05 | 2.25 | 2.14 | 2.02 | 1.98 | 1.99 | 2.06 |
| TC0400574  | ---    | 0.000374 | 1 | 5.85 | 6.33 | 6.55 | 6.44 | 6.38 | 6.34 | 6.16 | 6.20 |
| TC0800336  | ---    | 0.000385 | 1 | 2.70 | 2.87 | 2.97 | 2.79 | 2.69 | 2.66 | 2.65 | 2.83 |
| TC0900401  | ---    | 0.000391 | 1 | 5.24 | 5.51 | 5.56 | 5.44 | 5.56 | 5.47 | 5.23 | 5.35 |
| TC0700356  | ---    | 0.000392 | 1 | 8.08 | 8.45 | 8.66 | 8.54 | 8.57 | 8.51 | 8.37 | 8.32 |
| TC1501253  | ---    | 0.000397 | 1 | 2.46 | 4.63 | 3.84 | 4.05 | 4.04 | 4.01 | 4.02 | 3.82 |
| TC0700165  | ---    | 0.000405 | 1 | 4.27 | 4.51 | 4.50 | 4.49 | 4.57 | 4.47 | 4.46 | 4.41 |
| TC0901000  | ---    | 0.000405 | 1 | 2.38 | 2.70 | 2.97 | 2.94 | 2.91 | 2.84 | 2.89 | 2.80 |
| TC0103040  | ---    | 0.000412 | 1 | 4.46 | 4.54 | 4.79 | 4.64 | 4.57 | 4.39 | 4.43 | 4.36 |
| TC0202101  | ---    | 0.000412 | 1 | 3.31 | 3.80 | 3.93 | 3.86 | 3.79 | 3.96 | 3.81 | 3.56 |

|           |        |          |   |      |      |      |      |      |      |      |      |
|-----------|--------|----------|---|------|------|------|------|------|------|------|------|
| TC0202372 | ---    | 0.00043  | 1 | 7.45 | 7.92 | 8.09 | 8.19 | 8.14 | 7.97 | 7.72 | 7.75 |
| TC0X00276 | ---    | 0.000438 | 1 | 1.87 | 2.12 | 2.43 | 2.17 | 2.14 | 2.08 | 2.13 | 1.93 |
| TC0901197 | ---    | 0.000439 | 1 | 2.02 | 2.16 | 2.31 | 2.04 | 2.09 | 2.05 | 2.06 | 2.08 |
| TC1100841 | ---    | 0.00045  | 1 | 1.93 | 2.05 | 2.25 | 2.09 | 2.22 | 2.10 | 1.98 | 2.02 |
| TC1701142 | ---    | 0.000451 | 1 | 4.15 | 4.77 | 4.80 | 4.80 | 4.88 | 4.75 | 4.70 | 4.56 |
| TC0200184 | ---    | 0.000451 | 1 | 2.21 | 2.08 | 2.49 | 2.45 | 2.28 | 2.26 | 2.11 | 2.13 |
| TC0301177 | ---    | 0.000469 | 1 | 2.99 | 3.35 | 3.74 | 3.67 | 3.56 | 3.39 | 3.51 | 3.11 |
| TC1700214 | ---    | 0.000503 | 1 | 4.96 | 5.30 | 5.35 | 5.28 | 5.34 | 5.40 | 5.22 | 5.30 |
| TC0300402 | ---    | 0.00052  | 1 | 3.82 | 4.46 | 4.32 | 4.53 | 4.29 | 4.30 | 4.37 | 4.36 |
| TC1300601 | ---    | 0.000525 | 1 | 3.45 | 3.65 | 3.84 | 3.50 | 3.56 | 3.54 | 3.43 | 3.34 |
| TC0X00874 | ---    | 0.000533 | 1 | 2.41 | 3.11 | 2.84 | 2.42 | 2.70 | 2.54 | 2.67 | 2.35 |
| TC0103294 | ---    | 0.000572 | 1 | 2.19 | 2.50 | 2.39 | 2.49 | 2.29 | 2.57 | 2.25 | 2.38 |
| TC0102320 | ---    | 0.000572 | 1 | 4.78 | 5.54 | 5.56 | 5.45 | 5.44 | 5.44 | 5.29 | 5.29 |
| TC0700058 | ---    | 0.000578 | 1 | 5.87 | 6.29 | 6.38 | 6.34 | 6.32 | 6.35 | 6.15 | 6.18 |
| TC1800267 | ---    | 0.00064  | 1 | 3.42 | 3.56 | 3.74 | 3.69 | 3.83 | 3.58 | 3.59 | 3.51 |
| TC1600283 | ---    | 0.000662 | 1 | 4.29 | 4.70 | 4.73 | 4.48 | 4.51 | 4.48 | 4.51 | 4.36 |
| TC0600352 | ---    | 0.00068  | 1 | 7.09 | 7.28 | 7.43 | 7.13 | 7.14 | 7.19 | 7.11 | 7.03 |
| TC0600083 | ---    | 0.000684 | 1 | 1.67 | 1.70 | 1.97 | 1.82 | 1.90 | 1.74 | 1.76 | 1.77 |
| TC0100648 | ---    | 0.00069  | 1 | 3.16 | 3.41 | 3.67 | 3.50 | 3.44 | 3.20 | 3.46 | 3.24 |
| TC0901139 | ---    | 0.000712 | 1 | 4.19 | 4.72 | 4.38 | 4.67 | 5.03 | 4.65 | 4.47 | 4.36 |
| TC0500361 | ---    | 0.000724 | 1 | 5.91 | 6.24 | 6.25 | 6.28 | 6.24 | 6.11 | 5.95 | 6.00 |
| TC0500624 | ---    | 0.000746 | 1 | 4.46 | 4.80 | 4.93 | 4.94 | 5.11 | 4.89 | 4.70 | 4.83 |
| TC0400069 | ---    | 0.000768 | 1 | 7.41 | 7.83 | 7.90 | 7.83 | 7.84 | 7.83 | 7.67 | 7.77 |
| TC0500873 | ---    | 0.000769 | 1 | 4.19 | 5.53 | 5.49 | 5.52 | 5.45 | 5.33 | 5.02 | 4.67 |
| TC0X01281 | ---    | 0.000771 | 1 | 1.83 | 2.15 | 2.12 | 2.01 | 2.10 | 2.02 | 1.99 | 2.01 |
| TC0102180 | ---    | 0.000798 | 1 | 4.08 | 4.22 | 4.37 | 4.38 | 4.34 | 4.22 | 4.17 | 4.14 |
| TC0701005 | ---    | 0.000823 | 1 | 3.99 | 4.26 | 4.76 | 4.39 | 4.35 | 4.29 | 4.13 | 4.29 |
| TC1600703 | ---    | 0.000835 | 1 | 5.01 | 4.96 | 5.37 | 5.39 | 5.13 | 4.91 | 4.88 | 4.66 |
| TC0701001 | ---    | 0.000843 | 1 | 4.69 | 4.95 | 5.05 | 4.92 | 4.95 | 4.93 | 4.83 | 4.78 |
| TC0701272 | 650136 | 0.000916 | 1 | 4.96 | 5.29 | 5.51 | 5.35 | 5.37 | 5.30 | 5.17 | 5.18 |
| TC0400150 | ---    | 0.000948 | 1 | 1.86 | 1.89 | 2.11 | 1.88 | 1.88 | 1.83 | 1.94 | 1.83 |
| TC1701267 | ---    | 0.000982 | 1 | 3.31 | 3.65 | 3.65 | 3.53 | 3.62 | 3.61 | 3.58 | 3.62 |
| TC0801348 | ---    | 0.000996 | 1 | 3.06 | 3.76 | 3.86 | 3.75 | 3.79 | 3.84 | 3.88 | 3.68 |
| TC0201438 | ---    | 0.000998 | 1 | 6.66 | 7.02 | 7.35 | 6.83 | 6.70 | 7.13 | 6.84 | 7.11 |

|           |                |        |                                            |          |      |      |      |      |      |      |      |      |      |
|-----------|----------------|--------|--------------------------------------------|----------|------|------|------|------|------|------|------|------|------|
| TC0900370 | ---            |        | 0.000999                                   | 1        | 2.62 | 3.17 | 3.38 | 3.09 | 3.16 | 3.14 | 3.04 | 3.02 |      |
| TC0900128 | A2A2Z9_HUM     | ---    | Ankyrin repeat domain 18B. [Source:Ur      | 0.000448 | 2    | 2.70 | 2.74 | 2.77 | 2.76 | 2.88 | 2.83 | 2.86 | 2.79 |
| TC0102743 | A2A3Q1_HUM     | ---    | Putative novel transcript. [Source:Unip    | 0.0009   | 2    | 4.62 | 4.84 | 4.97 | 5.15 | 5.11 | 5.20 | 5.19 | 5.35 |
| TC1601218 | AARS           | 16     | alanyl-tRNA synthetase                     | 0.00017  | 2    | 4.43 | 4.51 | 4.47 | 4.64 | 4.86 | 4.77 | 4.87 | 4.64 |
| TC1100813 | AASDHPPT       | 60496  | aminoadipate-semialdehyde dehydrog         | 6.37E-05 | 2    | 4.72 | 5.00 | 5.10 | 5.12 | 4.97 | 5.12 | 5.21 | 5.20 |
| TC0700240 | ABCA13         | 154664 | ATP-binding cassette, sub-family A (AB     | 5.98E-12 | 2    | 3.13 | 4.40 | 3.97 | 4.86 | 5.51 | 5.38 | 4.95 | 4.33 |
| TC0103333 | ABCB10         | 23456  | ATP-binding cassette, sub-family B (MD     | 5.15E-06 | 2    | 4.45 | 4.51 | 4.45 | 4.85 | 4.94 | 5.05 | 5.04 | 4.86 |
| TC0100746 | ABCD3          | 5825   | ATP-binding cassette, sub-family D (ALI    | 4.86E-07 | 2    | 3.68 | 4.37 | 4.40 | 4.57 | 4.72 | 4.59 | 4.52 | 4.25 |
| TC0400573 | ABCE1          | 6059   | ATP-binding cassette, sub-family E (OAI    | 0.000113 | 2    | 2.94 | 3.14 | 3.02 | 3.26 | 3.51 | 3.36 | 3.50 | 3.25 |
| TC0600168 | ABT1           | 29777  | activator of basal transcription 1         | 7.19E-06 | 2    | 4.73 | 4.71 | 4.94 | 5.02 | 4.93 | 5.09 | 5.10 | 5.03 |
| TC1701263 | ACACA          | 31     | acetyl-Coenzyme A carboxylase alpha        | 0.000786 | 2    | 3.54 | 3.53 | 3.56 | 3.61 | 3.73 | 3.67 | 3.66 | 3.58 |
| TC0100659 | ACADM          | 34     | acyl-Coenzyme A dehydrogenase, C-4 t       | 2.85E-10 | 2    | 4.24 | 5.02 | 5.15 | 5.19 | 5.36 | 5.33 | 5.30 | 5.08 |
| TC0600855 | ACAT2          | 39     | acetyl-Coenzyme A acetyltransferase 2      | 9.56E-09 | 2    | 4.48 | 4.82 | 4.77 | 4.99 | 5.08 | 5.06 | 5.11 | 4.92 |
| TC1000840 | ACBD5          | 91452  | acyl-Coenzyme A binding domain cont        | 0.000424 | 2    | 6.27 | 6.36 | 6.61 | 6.67 | 6.49 | 6.57 | 6.62 | 6.63 |
| TC0103041 | ACBD6          | 84320  | acyl-Coenzyme A binding domain cont        | 8.95E-06 | 2    | 4.20 | 4.48 | 4.59 | 4.60 | 4.77 | 4.76 | 4.81 | 4.54 |
| TC0300820 | ACTL6A         | 86     | actin-like 6A                              | 1.83E-10 | 2    | 4.20 | 4.17 | 4.15 | 4.51 | 4.83 | 4.88 | 4.84 | 4.65 |
| TC0201769 | ACTR1B         | 10120  | ARP1 actin-related protein 1 homolog f     | 0.00011  | 2    | 5.07 | 5.16 | 5.02 | 5.17 | 5.29 | 5.27 | 5.25 | 5.21 |
| TC1200620 | ACTR6          | 64431  | ARP6 actin-related protein 6 homolog (     | 0.00021  | 2    | 2.98 | 3.30 | 3.47 | 3.41 | 3.34 | 3.40 | 3.50 | 3.44 |
| TC1500274 | ADAL           | 161823 | adenosine deaminase-like                   | 3.09E-06 | 2    | 3.27 | 3.23 | 3.23 | 3.40 | 3.42 | 3.39 | 3.48 | 3.47 |
| TC0201299 | ADAM17         | 6868   | ADAM metalloproteinase domain 17 (tu       | 5.42E-08 | 2    | 7.05 | 6.90 | 7.17 | 7.60 | 7.49 | 7.28 | 7.31 | 7.18 |
| TC0900799 | ADFP           | 123    | adipose differentiation-related protein    | 5.83E-09 | 2    | 4.83 | 4.69 | 4.82 | 5.51 | 5.28 | 5.28 | 5.65 | 5.58 |
| TC0201277 | ADI1           | 55256  | acireductone dioxygenase 1 /// 1,2-dih     | 1.00E-10 | 2    | 4.84 | 4.88 | 4.91 | 5.22 | 5.28 | 5.27 | 5.31 | 5.34 |
| TC0300530 | ADPRH          | 141    | ADP-ribosylarginine hydrolase              | 0.000494 | 2    | 3.79 | 3.97 | 3.96 | 4.09 | 4.09 | 4.02 | 4.11 | 4.11 |
| TC2200298 | ADSL           | 158    | adenylosuccinate lyase /// Adenylosuc      | 4.86E-06 | 2    | 4.39 | 4.65 | 4.85 | 4.94 | 5.02 | 5.00 | 5.04 | 4.74 |
| TC0103416 | ADSS           | 159    | adenylosuccinate synthase                  | 1.11E-09 | 2    | 6.10 | 6.76 | 6.56 | 6.91 | 7.36 | 7.32 | 7.11 | 6.87 |
| TC0X00646 | AFF2           | 2334   | AF4/FMR2 family, member 2 /// AF4/FI       | 5.09E-10 | 2    | 4.17 | 5.01 | 4.32 | 4.95 | 5.49 | 5.56 | 5.33 | 4.96 |
| TC1800342 | AFG3L2         | 10939  | AFG3 ATPase family gene 3-like 2 (yeas     | 9.84E-07 | 2    | 3.90 | 3.91 | 3.81 | 3.96 | 4.06 | 4.02 | 4.17 | 4.05 |
| TC0700754 | AGK            | 55750  | acylglycerol kinase                        | 5.51E-06 | 2    | 3.59 | 3.76 | 3.91 | 4.07 | 4.01 | 3.87 | 3.99 | 3.88 |
| TC2100165 | AGPAT3         | 56894  | 1-acylglycerol-3-phosphate O-acyltrans     | 0.000144 | 2    | 4.63 | 4.83 | 4.80 | 4.91 | 4.83 | 4.85 | 4.95 | 4.96 |
| TC0200894 | AGPS           | 8540   | alkylglycerone phosphate synthase          | 1.61E-10 | 2    | 4.48 | 5.27 | 5.22 | 5.75 | 6.13 | 6.09 | 5.90 | 5.57 |
| TC0100122 | AGTRAP         | 57085  | angiotensin II receptor-associated prot    | 7.59E-16 | 2    | 6.37 | 6.66 | 6.99 | 7.28 | 7.23 | 6.94 | 6.92 | 6.83 |
| TC2000677 | AHCY           | 191    | S-adenosylhomocysteine hydrolase           | 4.54E-05 | 2    | 4.47 | 4.59 | 4.52 | 4.66 | 4.81 | 4.73 | 4.66 | 4.59 |
| TC0103258 | AIDA /// C1orf | 730996 | // axin interactor, dorsalization associat | 6.27E-08 | 2    | 5.55 | 5.66 | 5.74 | 5.87 | 5.79 | 5.93 | 6.04 | 6.01 |
| TC0600773 | AIG1           | 51390  | androgen-induced 1 /// Androgen-indu       | 3.94E-06 | 2    | 4.81 | 5.30 | 5.55 | 5.24 | 5.48 | 5.54 | 5.51 | 5.31 |

|            |                                                                |                                                |          |      |      |      |      |      |      |      |      |      |
|------------|----------------------------------------------------------------|------------------------------------------------|----------|------|------|------|------|------|------|------|------|------|
| TC0102899  | AIM2                                                           | 9447 absent in melanoma 2 /// Interferon-in    | 2.80E-15 | 2    | 6.23 | 7.73 | 8.37 | 8.78 | 8.54 | 8.63 | 8.55 | 8.29 |
| TC1100601  | AIP                                                            | 9049 aryl hydrocarbon receptor interacting p   | 0.000115 | 2    | 6.11 | 6.02 | 6.16 | 6.49 | 6.45 | 6.31 | 6.34 | 6.37 |
| TC0102091  | AK2                                                            | 204 adenylate kinase 2                         | 2.47E-07 | 2    | 5.93 | 6.04 | 5.78 | 6.07 | 6.23 | 6.31 | 6.30 | 6.24 |
| TC0900755  | AK3                                                            | 50808 adenylate kinase 3 /// GTP:AMP phosp     | 2.02E-05 | 2    | 3.45 | 3.70 | 3.69 | 3.77 | 3.81 | 3.73 | 3.83 | 3.68 |
| TC1200702  | ALDH2                                                          | 217 aldehyde dehydrogenase 2 family (mito      | 3.56E-09 | 2    | 4.67 | 5.57 | 5.46 | 5.90 | 5.98 | 5.71 | 5.72 | 5.37 |
| TC1700224  | ALDH3A2                                                        | 224 aldehyde dehydrogenase 3 family, men       | 3.94E-11 | 2    | 4.12 | 4.26 | 4.25 | 4.56 | 4.68 | 4.72 | 4.79 | 4.63 |
| TC1300162  | ALG11 /// UTP:440138 // asparagine-linked glycosylation 11 hor | 0.000506                                       | 2        | 5.16 | 5.30 | 5.29 | 5.36 | 5.27 | 5.40 | 5.55 | 5.50 |      |
| TC0901191  | ALG2                                                           | 85365 asparagine-linked glycosylation 2 homc   | 0.000124 | 2    | 4.19 | 4.39 | 4.42 | 4.56 | 4.55 | 4.51 | 4.58 | 4.46 |
| TC1300403  | ALG5                                                           | 29880 asparagine-linked glycosylation 5 homc   | 2.77E-09 | 2    | 3.48 | 3.71 | 3.51 | 3.92 | 4.16 | 4.29 | 4.22 | 4.02 |
| TC0100613  | ALG6                                                           | 29929 asparagine-linked glycosylation 6 homc   | 4.15E-06 | 2    | 4.65 | 5.03 | 5.29 | 5.27 | 5.23 | 5.25 | 5.30 | 5.15 |
| TC1101691  | ALG8                                                           | 79053 asparagine-linked glycosylation 8 homc   | 0.000771 | 2    | 4.15 | 4.39 | 4.47 | 4.44 | 4.57 | 4.58 | 4.62 | 4.47 |
| TC0201019  | ALS2CR8                                                        | 79800 amyotrophic lateral sclerosis 2 (juvenil | 3.86E-06 | 2    | 3.41 | 3.65 | 3.74 | 3.84 | 3.80 | 3.78 | 3.75 | 3.67 |
| TC1601116  | AMFR                                                           | 267 autocrine motility factor receptor /// A   | 2.35E-07 | 2    | 5.17 | 5.55 | 5.42 | 5.84 | 5.73 | 5.66 | 5.66 | 5.65 |
| TC1100769  | AMOTL1                                                         | 154810 angiomin like 1 /// Angiomin-like p     | 4.99E-06 | 2    | 4.00 | 4.07 | 4.08 | 4.22 | 4.37 | 4.18 | 4.09 | 3.99 |
| TC1700712  | AMZ2                                                           | 51321 archaeysin family metalloproteinase 2    | 7.78E-06 | 2    | 5.53 | 5.52 | 5.74 | 5.79 | 5.75 | 5.70 | 5.76 | 5.73 |
| TC17r00032 | ANAPC11                                                        | 51529 APC11 anaphase promoting complex su      | 1.66E-09 | 2    | 5.79 | 6.07 | 6.23 | 6.32 | 6.34 | 6.32 | 6.16 | 6.14 |
| TC1700846  | ANAPC11                                                        | 51529 APC11 anaphase promoting complex su      | 1.17E-06 | 2    | 5.61 | 5.90 | 6.04 | 6.19 | 6.24 | 6.12 | 6.07 | 5.99 |
| TC1201560  | ANAPC7                                                         | 51434 anaphase promoting complex subunit       | 0.000288 | 2    | 5.13 | 4.94 | 5.13 | 5.34 | 5.25 | 5.23 | 5.33 | 5.22 |
| TC0700472  | ANKIB1                                                         | 54467 ankyrin repeat and IBR domain contain    | 0.000383 | 2    | 5.19 | 5.38 | 5.55 | 5.68 | 5.49 | 5.49 | 5.67 | 5.52 |
| TC0900923  | ANKRD18A                                                       | --- Ankyrin repeat domain-containing prot      | 1.22E-07 | 2    | 3.17 | 3.37 | 3.45 | 3.70 | 3.92 | 3.85 | 4.02 | 3.68 |
| TC0301043  | ANKRD28                                                        | 23243 ankyrin repeat domain 28 /// Ankyrin r   | 1.40E-05 | 2    | 4.36 | 4.64 | 5.09 | 5.19 | 5.11 | 5.10 | 5.16 | 4.79 |
| TC0500344  | ANKRD32                                                        | 84250 ankyrin repeat domain 32                 | 2.03E-05 | 2    | 4.29 | 4.62 | 4.80 | 4.87 | 4.83 | 4.89 | 4.96 | 4.72 |
| TC1701522  | ANKRD40                                                        | 91369 ankyrin repeat domain 40                 | 0.000423 | 2    | 4.26 | 4.50 | 4.57 | 4.69 | 4.68 | 4.65 | 4.71 | 4.62 |
| TC0700185  | ANLN                                                           | 54443 anillin, actin binding protein           | 3.54E-11 | 2    | 3.00 | 3.51 | 3.42 | 3.99 | 4.55 | 4.40 | 4.19 | 3.77 |
| TC0900425  | ANP32B                                                         | 10541 acidic (leucine-rich) nuclear phosphopr  | 6.26E-17 | 2    | 7.79 | 8.06 | 8.18 | 8.62 | 8.91 | 8.91 | 8.82 | 8.63 |
| TC0102716  | ANP32E                                                         | 81611 acidic (leucine-rich) nuclear phosphopr  | 1.43E-10 | 2    | 7.13 | 8.10 | 8.16 | 8.23 | 8.37 | 8.29 | 8.26 | 8.02 |
| TC0200318  | ANXA4                                                          | 307 annexin A4                                 | 1.80E-13 | 2    | 4.56 | 5.47 | 5.47 | 5.89 | 6.10 | 6.04 | 5.86 | 5.47 |
| TC0100245  | AOX2                                                           | 23028 amine oxidase (flavin containing) doma   | 1.27E-12 | 2    | 4.48 | 4.47 | 4.42 | 4.93 | 5.06 | 5.19 | 5.35 | 5.10 |
| TC1901634  | AP2S1                                                          | 1175 adaptor-related protein complex 2, sig    | 7.75E-06 | 2    | 4.77 | 4.82 | 4.92 | 5.14 | 5.15 | 4.99 | 5.08 | 5.00 |
| TC1400029  | APEX1                                                          | 328 APEX nuclease (multifunctional DNA re      | 8.58E-07 | 2    | 5.17 | 5.16 | 4.93 | 5.41 | 5.75 | 5.69 | 5.63 | 5.29 |
| TC1101305  | APIP                                                           | 51074 APAF1 interacting protein                | 6.26E-06 | 2    | 3.98 | 4.45 | 4.49 | 4.52 | 4.65 | 4.53 | 4.56 | 4.44 |
| TC0100109  | APITD1 /// COF378708 // apoptosis-inducing, TAF9-like domain 1 | 1.96E-05                                       | 2        | 3.09 | 3.22 | 3.21 | 3.29 | 3.36 | 3.39 | 3.30 | 3.21 |      |
| TC2200281  | APOBEC3B                                                       | 9582 apolipoprotein B mRNA editing enzyme      | 3.42E-08 | 2    | 4.93 | 4.96 | 4.81 | 5.13 | 5.37 | 5.35 | 5.27 | 5.16 |
| TC0X00392  | APOOL                                                          | 139322 apolipoprotein O-like /// Apolipoprotei | 5.10E-08 | 2    | 4.14 | 4.76 | 4.98 | 4.96 | 4.89 | 5.09 | 5.03 | 5.00 |

|           |           |                                                  |          |   |       |       |       |       |       |       |       |       |
|-----------|-----------|--------------------------------------------------|----------|---|-------|-------|-------|-------|-------|-------|-------|-------|
| TC2100249 | APP       | 351 amyloid beta (A4) precursor protein (p       | 1.31E-20 | 2 | 5.20  | 6.99  | 6.65  | 7.23  | 7.65  | 7.50  | 7.18  | 6.63  |
| TC1701581 | APPBP2    | 10513 amyloid beta precursor protein (cytopl     | 0.000437 | 2 | 5.35  | 5.50  | 5.46  | 5.60  | 5.45  | 5.73  | 5.72  | 5.75  |
| TC0300325 | APPL1     | 26060 adaptor protein, phosphotyrosine inter     | 2.70E-13 | 2 | 4.26  | 5.35  | 5.67  | 5.70  | 5.76  | 5.72  | 5.74  | 5.41  |
| TC1601340 | APRT      | 353 adenine phosphoribosyltransferase            | 9.16E-05 | 2 | 6.29  | 6.31  | 6.17  | 6.43  | 6.44  | 6.49  | 6.51  | 6.45  |
| TC2000352 | ARFGEF2   | 10564 ADP-ribosylation factor guanine nucleo     | 4.99E-07 | 2 | 4.18  | 4.35  | 4.28  | 4.59  | 4.70  | 4.63  | 4.75  | 4.49  |
| TC1500184 | ARHGAP11A | 9824 Rho GTPase activating protein 11A           | 1.04E-05 | 2 | 2.53  | 2.84  | 2.75  | 3.00  | 3.38  | 3.36  | 3.26  | 3.02  |
| TC1500160 | ARHGAP11B | 89839 Rho GTPase activating protein 11B          | 0.000129 | 2 | 2.95  | 3.04  | 3.07  | 3.16  | 3.44  | 3.35  | 3.36  | 3.19  |
| TC1000826 | ARHGAP21  | 57584 Rho GTPase activating protein 21 /// Rl    | 1.83E-08 | 2 | 3.73  | 3.89  | 3.73  | 4.17  | 4.44  | 4.47  | 4.43  | 4.36  |
| TC1201020 | ARHGDI1   | 397 Rho GDP dissociation inhibitor (GDI) be      | 0.000573 | 2 | 10.42 | 10.29 | 10.45 | 10.48 | 10.46 | 10.45 | 10.42 | 10.42 |
| TC1201493 | ARL1      | 400 ADP-ribosylation factor-like 1               | 2.17E-06 | 2 | 3.97  | 4.44  | 4.62  | 4.81  | 4.82  | 4.75  | 4.82  | 4.74  |
| TC0500977 | ARL15     | 54622 ADP-ribosylation factor-like 15 /// ADP    | 8.20E-05 | 2 | 5.43  | 5.33  | 5.32  | 5.86  | 5.57  | 5.89  | 5.81  | 5.82  |
| TC1600471 | ARL2BP    | 23568 ADP-ribosylation factor-like 2 binding p   | 1.41E-07 | 2 | 5.74  | 6.02  | 6.19  | 6.32  | 6.31  | 6.37  | 6.45  | 6.33  |
| TC0202005 | ARL5A     | 26225 ADP-ribosylation factor-like 5A            | 2.41E-09 | 2 | 4.19  | 4.49  | 4.39  | 4.68  | 4.69  | 4.83  | 4.87  | 4.83  |
| TC0300361 | ARL6IP5   | 10550 ADP-ribosylation-like factor 6 interactir  | 2.63E-21 | 2 | 6.83  | 7.62  | 8.05  | 8.32  | 8.03  | 7.90  | 7.98  | 7.90  |
| TC0200788 | ARL6IP6   | 151188 ADP-ribosylation-like factor 6 interactir | 1.36E-09 | 2 | 4.77  | 5.40  | 5.60  | 5.76  | 5.67  | 5.69  | 5.68  | 5.69  |
| TC0800981 | ARMC1     | 55156 armadillo repeat containing 1              | 0.000119 | 2 | 3.27  | 3.39  | 3.45  | 3.49  | 3.72  | 3.62  | 3.70  | 3.66  |
| TC0300292 | ARMET     | 7873 arginine-rich, mutated in early stage tu    | 0.00081  | 2 | 6.49  | 6.71  | 6.67  | 6.74  | 6.79  | 6.71  | 6.84  | 6.85  |
| TC0101608 | ARV1      | 64801 ARV1 homolog (S. cerevisiae) /// Protei    | 0.00014  | 2 | 4.18  | 4.11  | 4.17  | 4.27  | 4.29  | 4.28  | 4.30  | 4.22  |
| TC1000743 | ASB13     | 79754 ankyrin repeat and SOCS box-containin      | 0.000145 | 2 | 3.90  | 4.19  | 4.13  | 4.16  | 4.19  | 4.25  | 4.16  | 4.11  |
| TC0601482 | ASCC3     | 10973 activating signal cointegrator 1 comple    | 0.000165 | 2 | 3.30  | 3.45  | 3.43  | 3.64  | 3.77  | 3.71  | 3.79  | 3.65  |
| TC0600682 | ASF1A     | 25842 ASF1 anti-silencing function 1 homolog     | 6.30E-09 | 2 | 3.90  | 4.40  | 4.50  | 4.84  | 4.85  | 4.90  | 5.05  | 4.89  |
| TC0800226 | ASH2L     | 9070 ash2 (absent, small, or homeotic)-like (    | 0.000145 | 2 | 6.25  | 6.43  | 6.66  | 6.70  | 6.60  | 6.63  | 6.67  | 6.61  |
| TC0103096 | ASPM      | 259266 asp (abnormal spindle) homolog, micro     | 8.20E-06 | 2 | 2.57  | 2.72  | 2.69  | 2.92  | 3.30  | 3.20  | 3.10  | 2.88  |
| TC0801228 | ATAD2     | 29028 ATPase family, AAA domain containing       | 9.40E-11 | 2 | 3.84  | 4.23  | 4.15  | 4.65  | 5.07  | 5.05  | 4.98  | 4.60  |
| TC1700334 | ATAD5     | 79915 ATPase family, AAA domain containing       | 4.25E-05 | 2 | 3.62  | 3.84  | 3.87  | 4.12  | 4.22  | 4.14  | 4.18  | 4.02  |
| TC1600166 | ATF7IP2   | 80063 activating transcription factor 7 interac  | 1.30E-08 | 2 | 3.34  | 3.53  | 3.57  | 3.76  | 3.89  | 3.84  | 3.72  | 3.58  |
| TC0100609 | ATG4C     | 84938 ATG4 autophagy related 4 homolog C (:      | 2.32E-07 | 2 | 3.05  | 3.09  | 3.30  | 3.35  | 3.32  | 3.29  | 3.36  | 3.37  |
| TC1600614 | ATMIN     | 23300 ATM interactor                             | 1.65E-05 | 2 | 4.04  | 4.16  | 4.29  | 4.42  | 4.47  | 4.45  | 4.54  | 4.42  |
| TC0501428 | ATOX1     | 475 ATX1 antioxidant protein 1 homolog (y        | 3.90E-05 | 2 | 6.14  | 6.31  | 6.41  | 6.54  | 6.59  | 6.49  | 6.52  | 6.50  |
| TC1800441 | ATP5A1    | 642727 // ATP synthase, H+ transporting, mitoch  | 1.34E-06 | 2 | 5.87  | 6.28  | 6.53  | 6.61  | 6.70  | 6.63  | 6.66  | 6.46  |
| TC2000869 | ATP5E     | 514 ATP synthase, H+ transporting, mitoch        | 9.02E-09 | 2 | 10.11 | 10.37 | 10.60 | 10.59 | 10.56 | 10.55 | 10.56 | 10.54 |
| TC1201255 | ATP5G2    | 517 ATP synthase, H+ transporting, mitoch        | 8.61E-06 | 2 | 4.19  | 4.29  | 4.35  | 4.44  | 4.51  | 4.43  | 4.45  | 4.36  |
| TC1701684 | ATP5H     | 10476 ATP synthase, H+ transporting, mitoch      | 2.49E-14 | 2 | 7.72  | 8.19  | 8.32  | 8.44  | 8.45  | 8.40  | 8.37  | 8.29  |
| TC0400747 | ATP5I     | 521 ATP synthase, H+ transporting, mitoch        | 3.02E-13 | 2 | 8.75  | 8.92  | 9.00  | 9.22  | 9.23  | 9.22  | 9.27  | 9.23  |



|           |                |                                                |          |   |      |      |      |      |      |      |      |      |
|-----------|----------------|------------------------------------------------|----------|---|------|------|------|------|------|------|------|------|
| TC2100248 | ATP5J          | 522 ATP synthase, H+ transporting, mitoch      | 5.51E-09 | 2 | 5.48 | 5.76 | 5.95 | 5.93 | 5.92 | 5.94 | 5.89 | 5.90 |
| TC0701456 | ATP5J2         | 9551 ATP synthase, H+ transporting, mitoch     | 1.25E-07 | 2 | 5.87 | 6.16 | 6.35 | 6.28 | 6.35 | 6.29 | 6.29 | 6.26 |
| TC1100891 | ATP5L          | 10632 ATP synthase, H+ transporting, mitoch    | 5.99E-11 | 2 | 7.20 | 7.84 | 7.96 | 8.03 | 8.03 | 7.98 | 7.99 | 7.90 |
| TC1400928 | ATP6V1D        | 51382 ATPase, H+ transporting, lysosomal 34k   | 3.49E-06 | 2 | 5.99 | 6.40 | 6.52 | 6.50 | 6.42 | 6.52 | 6.57 | 6.48 |
| TC2200417 | ATP6V1E1       | 529 ATPase, H+ transporting, lysosomal 31k     | 3.75E-07 | 2 | 7.51 | 7.72 | 7.80 | 7.83 | 7.79 | 7.91 | 7.92 | 7.93 |
| TC0700686 | ATP6V1F        | 9296 ATPase, H+ transporting, lysosomal 14k    | 4.05E-14 | 2 | 5.88 | 6.52 | 6.62 | 6.68 | 6.69 | 6.63 | 6.62 | 6.60 |
| TC0900505 | ATP6V1G1       | 9550 ATPase, H+ transporting, lysosomal 13k    | 4.26E-09 | 2 | 5.55 | 5.75 | 5.81 | 5.81 | 5.74 | 5.95 | 5.99 | 6.11 |
| TC0400907 | ATP8A1         | 10396 ATPase, aminophospholipid transporte     | 1.70E-09 | 2 | 5.01 | 4.88 | 4.88 | 5.37 | 5.60 | 5.58 | 5.49 | 5.14 |
| TC1500944 | ATP8B4         | 79895 ATPase, class I, type 8B, member 4 /// I | 5.96E-14 | 2 | 3.92 | 5.34 | 5.65 | 5.89 | 6.28 | 6.10 | 5.74 | 5.28 |
| TC0100320 | ATPIF1         | 93974 ATPase inhibitory factor 1               | 0.000124 | 2 | 7.04 | 7.46 | 7.40 | 7.44 | 7.57 | 7.53 | 7.56 | 7.51 |
| TC2200355 | ATXN10         | 25814 ataxin 10 /// Ataxin-10 (Spinocerebella  | 1.33E-09 | 2 | 4.27 | 4.44 | 4.53 | 4.83 | 4.98 | 4.91 | 5.01 | 4.81 |
| TC2000849 | AURKA          | 6790 aurora kinase A                           | 1.08E-07 | 2 | 4.37 | 4.74 | 4.75 | 4.96 | 5.13 | 5.04 | 4.97 | 4.82 |
| TC1701007 | AURKB          | 9212 aurora kinase B                           | 5.11E-07 | 2 | 4.37 | 4.45 | 4.37 | 4.51 | 4.70 | 4.65 | 4.57 | 4.49 |
| TC1900019 | AZU1           | 566 azurocidin 1 (cationic antimicrobial pro   | 5.67E-05 | 2 | 5.22 | 5.33 | 5.34 | 5.45 | 5.60 | 5.60 | 5.53 | 5.41 |
| TC0100031 | B3GALT6        | 126792 UDP-Gal:betaGal beta 1,3-galactosyltra  | 5.12E-06 | 2 | 4.82 | 4.80 | 5.02 | 5.27 | 5.24 | 5.32 | 5.44 | 5.24 |
| TC0900852 | B4GALT1        | 2683 UDP-Gal:betaGlcNAc beta 1,4- galactos     | 0.000904 | 2 | 7.24 | 7.21 | 7.34 | 7.47 | 7.45 | 7.47 | 7.38 | 7.44 |
| TC1800401 | B4GALT6        | 9331 UDP-Gal:betaGlcNAc beta 1,4- galactos     | 5.73E-05 | 2 | 3.09 | 3.31 | 3.34 | 3.35 | 3.51 | 3.46 | 3.31 | 3.44 |
| TC1401147 | BAG5           | 9529 BCL2-associated athanogene 5              | 2.98E-05 | 2 | 5.05 | 5.18 | 5.12 | 5.18 | 5.22 | 5.29 | 5.28 | 5.33 |
| TC0700609 | BCAP29         | 55973 B-cell receptor-associated protein 29    | 7.15E-08 | 2 | 4.17 | 4.93 | 4.95 | 4.95 | 5.16 | 5.03 | 5.03 | 4.81 |
| TC1000676 | BCCIP          | 56647 BRCA2 and CDKN1A interacting protein     | 1.81E-07 | 2 | 3.94 | 4.24 | 4.08 | 4.50 | 4.69 | 4.74 | 4.91 | 4.63 |
| TC0102397 | BCL10          | 8915 B-cell CLL/lymphoma 10                    | 0.000383 | 2 | 4.51 | 4.84 | 4.81 | 4.84 | 4.87 | 4.96 | 4.78 | 4.89 |
| TC0102560 | BCL2L15 /// C1 | 440603 BCL2-like 15 /// Uncharacterized protei | 9.78E-15 | 2 | 2.90 | 4.68 | 3.68 | 4.94 | 5.94 | 5.96 | 5.42 | 4.50 |
| TC0301910 | BDH1           | 622 3-hydroxybutyrate dehydrogenase, typ       | 0.000225 | 2 | 3.43 | 3.47 | 3.47 | 3.53 | 3.70 | 3.64 | 3.63 | 3.53 |
| TC0X01111 | BEX1           | 55859 brain expressed, X-linked 1              | 2.20E-12 | 2 | 4.35 | 5.10 | 4.94 | 5.19 | 5.58 | 5.46 | 5.32 | 4.99 |
| TC0901136 | BICD2          | 23299 bicaudal D homolog 2 (Drosophila)        | 0.000568 | 2 | 6.32 | 6.21 | 6.28 | 6.55 | 6.50 | 6.39 | 6.41 | 6.42 |
| TC1700808 | BIRC5          | 332 baculoviral IAP repeat-containing 5 (su)   | 3.52E-09 | 2 | 4.44 | 4.50 | 4.46 | 4.58 | 4.79 | 4.69 | 4.59 | 4.53 |
| TC1300263 | BIVM           | 54841 basic, immunoglobulin-like variable mo   | 0.000303 | 2 | 2.60 | 2.73 | 2.75 | 2.75 | 2.79 | 2.81 | 2.81 | 2.81 |
| TC1500629 | BLM            | 641 Bloom syndrome                             | 1.51E-05 | 2 | 3.24 | 3.54 | 3.46 | 3.65 | 3.88 | 3.86 | 3.89 | 3.74 |
| TC1001220 | BLOC1S2        | 282991 biogenesis of lysosome-related organel  | 0.000222 | 2 | 6.78 | 7.01 | 7.16 | 7.23 | 7.10 | 7.13 | 7.22 | 7.18 |
| TC0101270 | BLZF1          | 8548 basic leucine zipper nuclear factor 1 (JE | 3.80E-05 | 2 | 5.73 | 5.94 | 6.00 | 5.85 | 5.73 | 6.05 | 6.09 | 6.18 |
| TC1000106 | BMI1           | 648 BMI1 polycomb ring finger oncogene //      | 2.09E-08 | 2 | 3.80 | 3.84 | 3.87 | 4.05 | 4.12 | 4.11 | 4.20 | 4.16 |
| TC0600055 | BMP6           | 654 bone morphogenetic protein 6               | 8.28E-05 | 2 | 4.41 | 4.51 | 4.13 | 4.62 | 4.93 | 4.95 | 4.80 | 4.69 |
| TC1000183 | BMS1           | 9790 BMS1 homolog, ribosome assembly pro       | 1.68E-05 | 2 | 3.92 | 4.16 | 4.13 | 4.36 | 4.59 | 4.48 | 4.56 | 4.36 |
| TC2000250 | BPI            | 671 bactericidal/permeability-increasing pr    | 5.03E-19 | 2 | 4.42 | 8.38 | 7.61 | 8.61 | 9.22 | 9.26 | 8.43 | 7.67 |

|           |           |                                                |          |   |      |      |      |      |      |      |      |      |
|-----------|-----------|------------------------------------------------|----------|---|------|------|------|------|------|------|------|------|
| TC1300074 | BRCA2     | 675 breast cancer 2, early onset               | 0.000879 | 2 | 2.57 | 2.80 | 2.65 | 2.72 | 3.00 | 2.99 | 3.05 | 2.89 |
| TC1601092 | BRD7      | 29117 bromodomain containing 7                 | 0.000753 | 2 | 6.91 | 6.98 | 6.98 | 7.03 | 7.06 | 7.22 | 7.45 | 7.22 |
| TC0700507 | BRI3      | 25798 brain protein I3                         | 7.74E-11 | 2 | 7.19 | 7.65 | 7.77 | 7.79 | 7.79 | 7.85 | 7.74 | 7.66 |
| TC1200807 | BRI3BP    | 140707 BRI3 binding protein /// BRI3-binding p | 5.79E-11 | 2 | 5.59 | 5.53 | 5.57 | 5.91 | 5.83 | 5.95 | 5.98 | 6.02 |
| TC1701589 | BRIP1     | 83990 BRCA1 interacting protein C-terminal h   | 4.60E-08 | 2 | 2.86 | 3.07 | 3.12 | 3.45 | 3.67 | 3.63 | 3.55 | 3.28 |
| TC0102966 | BRP44     | 25874 brain protein 44                         | 3.17E-13 | 2 | 6.03 | 6.60 | 6.73 | 6.69 | 6.83 | 6.83 | 6.77 | 6.77 |
| TC1901288 | BST2      | 684 bone marrow stromal cell antigen 2         | 2.97E-05 | 2 | 6.16 | 6.73 | 6.72 | 6.74 | 6.59 | 7.01 | 7.32 | 7.51 |
| TC1501192 | BTBD1     | 53339 BTB (POZ) domain containing 1            | 1.60E-06 | 2 | 4.89 | 5.18 | 5.40 | 5.34 | 5.30 | 5.32 | 5.43 | 5.35 |
| TC0101433 | BTG2      | 7832 BTG family, member 2                      | 3.68E-05 | 2 | 7.68 | 8.29 | 7.69 | 7.86 | 8.06 | 8.24 | 8.08 | 8.22 |
| TC2100231 | BTG3      | 10950 BTG family, member 3 /// Protein BTG3    | 0.000287 | 2 | 4.12 | 4.37 | 4.33 | 4.41 | 4.52 | 4.49 | 4.39 | 4.36 |
| TC0201821 | BUB1      | 699 BUB1 budding uninhibited by benzimid       | 1.38E-08 | 2 | 3.37 | 3.61 | 3.54 | 3.85 | 4.26 | 4.13 | 3.99 | 3.78 |
| TC0500116 | BXDC2     | 55299 brix domain containing 2                 | 6.75E-05 | 2 | 2.91 | 2.94 | 2.93 | 2.98 | 3.11 | 3.05 | 3.21 | 3.03 |
| TC0100691 | BXDC5     | 80135 brix domain containing 5 /// Ribosome    | 2.28E-06 | 2 | 5.68 | 6.09 | 6.16 | 6.09 | 5.95 | 6.12 | 6.28 | 6.21 |
| TC1000326 | C10orf104 | 119504 chromosome 10 open reading frame 10     | 2.39E-06 | 2 | 5.99 | 6.46 | 6.36 | 6.40 | 6.43 | 6.39 | 6.50 | 6.49 |
| TC1000358 | C10orf11  | 83938 chromosome 10 open reading frame 11      | 6.12E-09 | 2 | 4.10 | 4.67 | 4.67 | 4.91 | 5.04 | 5.00 | 4.87 | 4.63 |
| TC1000775 | C10orf30  | 222389 chromosome 10 open reading frame 30     | 1.53E-06 | 2 | 4.02 | 4.72 | 4.33 | 4.58 | 4.60 | 4.88 | 5.05 | 4.91 |
| TC1101466 | C11orf10  | 746 chromosome 11 open reading frame 10        | 1.02E-09 | 2 | 6.31 | 6.84 | 6.94 | 7.05 | 7.06 | 7.03 | 7.16 | 7.07 |
| TC1100401 | C11orf31  | 280636 chromosome 11 open reading frame 31     | 5.79E-05 | 2 | 4.49 | 4.76 | 4.77 | 5.00 | 5.05 | 5.00 | 5.09 | 4.88 |
| TC1100249 | C11orf46  | 120534 chromosome 11 open reading frame 46     | 0.00014  | 2 | 3.48 | 3.82 | 3.88 | 3.96 | 3.94 | 3.94 | 4.28 | 4.03 |
| TC1101481 | C11orf48  | 79081 chromosome 11 open reading frame 48      | 3.73E-05 | 2 | 4.77 | 4.92 | 5.02 | 5.09 | 5.04 | 4.99 | 5.09 | 5.06 |
| TC1100847 | C11orf57  | 55216 chromosome 11 open reading frame 57      | 2.21E-07 | 2 | 4.90 | 4.90 | 5.01 | 5.12 | 5.16 | 5.20 | 5.37 | 5.22 |
| TC1101636 | C11orf59  | 55004 chromosome 11 open reading frame 59      | 2.46E-06 | 2 | 6.25 | 6.61 | 6.70 | 6.82 | 6.83 | 6.76 | 6.68 | 6.61 |
| TC1100694 | C11orf67  | 28971 chromosome 11 open reading frame 67      | 1.88E-06 | 2 | 4.22 | 4.34 | 4.56 | 4.85 | 4.77 | 4.75 | 4.80 | 4.66 |
| TC1101557 | C11orf68  | 83638 chromosome 11 open reading frame 68      | 0.00069  | 2 | 7.34 | 7.39 | 7.48 | 7.63 | 7.59 | 7.51 | 7.67 | 7.70 |
| TC1100283 | C11orf74  | 119710 chromosome 11 open reading frame 74     | 3.96E-05 | 2 | 4.05 | 4.51 | 4.54 | 4.67 | 4.90 | 4.89 | 4.76 | 4.58 |
| TC1201061 | C12orf11  | 55726 chromosome 12 open reading frame 11      | 3.48E-08 | 2 | 3.64 | 3.88 | 4.12 | 4.30 | 4.25 | 3.99 | 4.06 | 3.99 |
| TC1200560 | C12orf29  | 91298 chromosome 12 open reading frame 29      | 4.11E-08 | 2 | 3.60 | 3.78 | 3.62 | 3.85 | 4.32 | 4.18 | 4.23 | 3.96 |
| TC1201366 | C12orf31  | 84298 chromosome 12 open reading frame 31      | 1.81E-06 | 2 | 7.82 | 8.09 | 8.24 | 8.30 | 8.19 | 8.25 | 8.35 | 8.33 |
| TC1201602 | C12orf49  | 79794 chromosome 12 open reading frame 49      | 4.31E-06 | 2 | 4.89 | 5.12 | 5.19 | 5.24 | 5.32 | 5.31 | 5.38 | 5.25 |
| TC1200786 | C12orf65  | 91574 chromosome 12 open reading frame 65      | 2.22E-06 | 2 | 4.23 | 4.24 | 4.23 | 4.36 | 4.43 | 4.43 | 4.57 | 4.52 |
| TC1300489 | C13orf1   | 57213 chromosome 13 open reading frame 1       | 0.000172 | 2 | 3.75 | 3.82 | 3.84 | 3.96 | 4.04 | 4.00 | 4.14 | 4.02 |
| TC1300103 | C13orf15  | 28984 chromosome 13 open reading frame 15      | 1.23E-12 | 2 | 4.77 | 5.39 | 5.01 | 5.44 | 6.11 | 5.91 | 5.81 | 5.41 |
| TC1300634 | C13orf27  | 93081 chromosome 13 open reading frame 27      | 0.000174 | 2 | 2.65 | 2.69 | 2.80 | 2.96 | 2.89 | 2.99 | 3.12 | 3.08 |
| TC1300328 | C13orf3   | 221150 chromosome 13 open reading frame 3      | 0.000143 | 2 | 4.80 | 5.29 | 5.44 | 5.67 | 5.57 | 5.73 | 5.48 | 5.59 |

|           |                          |                                            |          |   |      |      |      |      |      |      |      |      |
|-----------|--------------------------|--------------------------------------------|----------|---|------|------|------|------|------|------|------|------|
| TC1300113 | C13orf31                 | 144811 chromosome 13 open reading frame 3  | 1.99E-05 | 2 | 3.56 | 3.60 | 3.65 | 3.83 | 3.81 | 3.80 | 3.97 | 3.92 |
| TC1401005 | C14orf1                  | 11161 chromosome 14 open reading frame 1   | 1.62E-07 | 2 | 5.60 | 5.43 | 5.42 | 5.87 | 6.00 | 6.02 | 5.96 | 5.81 |
| TC1400830 | C14orf104                | 55172 chromosome 14 open reading frame 10  | 0.00023  | 2 | 3.82 | 3.85 | 3.91 | 4.07 | 4.08 | 4.09 | 4.04 | 4.14 |
| TC1400456 | C14orf109                | 26175 chromosome 14 open reading frame 10  | 3.78E-12 | 2 | 5.28 | 5.48 | 5.67 | 5.80 | 5.77 | 5.91 | 5.90 | 5.86 |
| TC1400457 | C14orf130                | 55148 chromosome 14 open reading frame 13  | 1.14E-05 | 2 | 4.54 | 4.72 | 4.84 | 4.97 | 4.90 | 4.97 | 5.14 | 4.97 |
| TC1401032 | C14orf145                | 145508 chromosome 14 open reading frame 14 | 4.12E-07 | 2 | 3.71 | 4.10 | 4.00 | 4.15 | 4.34 | 4.20 | 4.18 | 4.11 |
| TC1400611 | C14orf153                | 84334 chromosome 14 open reading frame 15  | 1.75E-08 | 2 | 3.63 | 3.94 | 4.08 | 4.15 | 4.16 | 4.09 | 4.18 | 4.05 |
| TC1400397 | C14orf156                | 81892 chromosome 14 open reading frame 15  | 1.01E-08 | 2 | 6.63 | 7.11 | 7.22 | 7.41 | 7.41 | 7.49 | 7.54 | 7.42 |
| TC1400228 | C14orf166                | 51637 chromosome 14 open reading frame 16  | 1.09E-17 | 2 | 4.58 | 5.66 | 5.92 | 6.04 | 6.14 | 5.94 | 5.99 | 5.75 |
| TC1500803 | C15orf24                 | 56851 chromosome 15 open reading frame 24  | 5.13E-05 | 2 | 8.41 | 8.78 | 8.93 | 8.98 | 8.89 | 8.95 | 8.92 | 8.91 |
| TC1501191 | C15orf40                 | 123207 chromosome 15 open reading frame 40 | 6.62E-09 | 2 | 4.62 | 4.65 | 4.79 | 4.82 | 4.79 | 4.82 | 4.99 | 4.92 |
| TC1501047 | C15orf44                 | 81556 chromosome 15 open reading frame 44  | 7.09E-05 | 2 | 3.74 | 3.88 | 3.78 | 4.00 | 4.10 | 4.10 | 4.16 | 3.98 |
| TC1600003 | C16orf33                 | 79622 chromosome 16 open reading frame 33  | 3.42E-15 | 2 | 5.52 | 5.63 | 5.30 | 6.19 | 6.37 | 6.49 | 6.42 | 6.26 |
| TC1600737 | C16orf42                 | 115939 chromosome 16 open reading frame 42 | 6.25E-06 | 2 | 5.77 | 6.04 | 6.17 | 6.17 | 6.19 | 6.19 | 6.23 | 6.12 |
| TC1601282 | C16orf61                 | 56942 chromosome 16 open reading frame 61  | 4.75E-06 | 2 | 4.04 | 4.16 | 4.19 | 4.27 | 4.43 | 4.47 | 4.48 | 4.49 |
| TC1600894 | C16orf63                 | 123811 chromosome 16 open reading frame 63 | 5.31E-06 | 2 | 6.17 | 6.11 | 6.16 | 6.42 | 6.53 | 6.56 | 6.58 | 6.48 |
| TC1600156 | C16orf68                 | 79091 chromosome 16 open reading frame 68  | 0.000449 | 2 | 5.33 | 5.30 | 5.34 | 5.51 | 5.47 | 5.42 | 5.37 | 5.36 |
| TC1700548 | C17orf57                 | 124989 chromosome 17 open reading frame 57 | 1.52E-05 | 2 | 3.15 | 3.53 | 3.64 | 3.79 | 3.71 | 3.83 | 3.83 | 3.76 |
| TC1700641 | C17orf71                 | 55181 chromosome 17 open reading frame 71  | 4.15E-09 | 2 | 4.74 | 5.11 | 5.47 | 5.57 | 5.44 | 5.38 | 5.51 | 5.34 |
| TC1800110 | C18orf17 /// Q           | 125488 chromosome 18 open reading frame 17 | 9.01E-08 | 2 | 3.79 | 3.93 | 3.88 | 4.18 | 4.52 | 4.40 | 4.32 | 4.02 |
| TC1800181 | C18orf24                 | 220134 chromosome 18 open reading frame 24 | 1.83E-05 | 2 | 2.10 | 2.27 | 2.28 | 2.42 | 2.69 | 2.59 | 2.57 | 2.35 |
| TC1800466 | C18orf32 /// RI497661 // | chromosome 18 open reading frame 32        | 1.09E-07 | 2 | 5.14 | 5.17 | 5.24 | 5.39 | 5.47 | 5.42 | 5.47 | 5.31 |
| TC1800191 | C18orf54                 | 162681 chromosome 18 open reading frame 54 | 4.97E-05 | 2 | 2.54 | 2.58 | 2.78 | 2.92 | 2.95 | 2.73 | 2.80 | 2.73 |
| TC1800259 | C18orf55                 | 29090 chromosome 18 open reading frame 55  | 8.16E-07 | 2 | 3.67 | 3.71 | 3.71 | 3.81 | 4.00 | 3.97 | 4.12 | 3.93 |
| TC1800292 | C18orf56                 | 494514 chromosome 18 open reading frame 56 | 0.000576 | 2 | 2.31 | 2.47 | 2.39 | 2.47 | 2.76 | 2.64 | 2.69 | 2.45 |
| TC1901059 | C19orf10                 | 56005 chromosome 19 open reading frame 10  | 0.00014  | 2 | 4.22 | 4.53 | 4.47 | 4.67 | 4.87 | 4.74 | 4.80 | 4.48 |
| TC1900392 | C19orf2                  | 8725 chromosome 19 open reading frame 2    | 3.70E-11 | 2 | 3.37 | 3.57 | 3.50 | 4.08 | 4.33 | 4.39 | 4.44 | 4.07 |
| TC1901278 | C19orf42                 | 79086 chromosome 19 open reading frame 42  | 4.61E-05 | 2 | 4.92 | 5.14 | 5.21 | 5.31 | 5.34 | 5.28 | 5.30 | 5.27 |
| TC1900233 | C19orf53                 | 28974 chromosome 19 open reading frame 53  | 4.00E-08 | 2 | 6.73 | 6.91 | 7.00 | 7.35 | 7.35 | 7.29 | 7.32 | 7.29 |
| TC1901206 | C19orf56                 | 51398 chromosome 19 open reading frame 56  | 3.83E-07 | 2 | 5.92 | 6.17 | 6.30 | 6.54 | 6.57 | 6.49 | 6.46 | 6.37 |
| TC0102535 | C1orf103                 | 55791 chromosome 1 open reading frame 103  | 0.000828 | 2 | 5.14 | 5.22 | 5.52 | 5.34 | 5.20 | 5.36 | 5.49 | 5.50 |
| TC0103346 | C1orf131                 | 128061 chromosome 1 open reading frame 131 | 1.22E-07 | 2 | 5.45 | 5.38 | 5.50 | 5.82 | 5.86 | 5.86 | 6.08 | 5.88 |
| TC0102124 | C1orf149                 | 64769 chromosome 1 open reading frame 149  | 2.07E-09 | 2 | 4.81 | 4.97 | 4.93 | 5.10 | 5.21 | 5.31 | 5.38 | 5.38 |
| TC0100211 | C1orf151                 | 440574 chromosome 1 open reading frame 151 | 2.25E-06 | 2 | 5.18 | 5.27 | 5.42 | 5.42 | 5.42 | 5.40 | 5.45 | 5.42 |

|           |           |                                            |          |   |      |      |      |      |      |      |      |      |
|-----------|-----------|--------------------------------------------|----------|---|------|------|------|------|------|------|------|------|
| TC0102984 | C1orf156  | 92342 chromosome 1 open reading frame 156  | 0.000668 | 2 | 5.30 | 5.42 | 5.62 | 5.55 | 5.56 | 5.64 | 5.76 | 5.68 |
| TC0102273 | C1orf41   | 51668 chromosome 1 open reading frame 41   | 2.73E-05 | 2 | 5.14 | 5.38 | 5.47 | 5.56 | 5.64 | 5.66 | 5.74 | 5.62 |
| TC0102811 | C1orf43   | 25912 chromosome 1 open reading frame 43   | 1.28E-08 | 2 | 6.83 | 6.92 | 7.04 | 7.22 | 7.20 | 7.30 | 7.27 | 7.25 |
| TC0100452 | C1orf50   | 79078 chromosome 1 open reading frame 50   | 3.65E-05 | 2 | 5.02 | 5.11 | 5.25 | 5.27 | 5.31 | 5.34 | 5.41 | 5.39 |
| TC0101553 | C1orf67   | 200095 chromosome 1 open reading frame 67  | 1.38E-06 | 2 | 2.34 | 2.83 | 3.06 | 3.28 | 3.13 | 3.13 | 3.00 | 2.98 |
| TC0101688 | C1orf71   | 163882 chromosome 1 open reading frame 71  | 0.000349 | 2 | 5.17 | 5.07 | 5.10 | 5.47 | 5.32 | 5.45 | 5.51 | 5.47 |
| TC0101291 | C1orf9    | 51430 chromosome 1 open reading frame 9    | 5.46E-05 | 2 | 5.98 | 6.09 | 6.06 | 6.13 | 6.20 | 6.29 | 6.32 | 6.34 |
| TC1700955 | C1QBP     | 708 complement component 1, q subcomp      | 7.18E-05 | 2 | 5.29 | 5.49 | 5.45 | 5.66 | 5.85 | 5.75 | 5.82 | 5.75 |
| TC2000513 | C20orf116 | 65992 chromosome 20 open reading frame 116 | 1.43E-16 | 2 | 5.27 | 5.93 | 6.02 | 6.29 | 6.26 | 6.02 | 6.14 | 5.94 |
| TC2000519 | C20orf27  | 54976 chromosome 20 open reading frame 27  | 1.61E-05 | 2 | 5.31 | 5.47 | 5.40 | 5.48 | 5.59 | 5.56 | 5.55 | 5.42 |
| TC2000531 | C20orf30  | 29058 chromosome 20 open reading frame 30  | 5.10E-06 | 2 | 5.26 | 5.51 | 5.57 | 5.63 | 5.69 | 5.63 | 5.52 | 5.57 |
| TC2000076 | C20orf94  | 128710 chromosome 20 open reading frame 94 | 0.000754 | 2 | 4.19 | 4.25 | 4.42 | 4.28 | 4.36 | 4.55 | 4.53 | 4.42 |
| TC2100298 | C21orf45  | 54069 chromosome 21 open reading frame 45  | 1.37E-10 | 2 | 3.84 | 3.89 | 3.78 | 4.32 | 4.57 | 4.56 | 4.59 | 4.40 |
| TC2100305 | C21orf59  | 56683 chromosome 21 open reading frame 59  | 4.09E-08 | 2 | 4.48 | 4.44 | 4.50 | 4.67 | 4.74 | 4.80 | 4.92 | 4.75 |
| TC2100307 | C21orf66  | 94104 chromosome 21 open reading frame 66  | 0.000267 | 2 | 3.86 | 3.81 | 3.80 | 3.98 | 4.11 | 4.05 | 4.20 | 4.02 |
| TC2200332 | C22orf32  | 91689 chromosome 22 open reading frame 32  | 5.95E-08 | 2 | 5.06 | 5.85 | 5.82 | 6.11 | 6.35 | 6.17 | 6.08 | 5.88 |
| TC2200437 | C22orf39  | 128977 chromosome 22 open reading frame 39 | 3.11E-05 | 2 | 5.06 | 5.27 | 5.25 | 5.23 | 5.30 | 5.39 | 5.34 | 5.33 |
| TC0200308 | C2orf13   | 200558 chromosome 2 open reading frame 13  | 2.93E-07 | 2 | 4.06 | 4.44 | 4.64 | 4.85 | 4.77 | 4.69 | 4.68 | 4.75 |
| TC0200519 | C2orf15   | 150590 chromosome 2 open reading frame 15  | 2.23E-06 | 2 | 3.99 | 4.15 | 4.24 | 4.25 | 4.26 | 4.27 | 4.29 | 4.30 |
| TC0202276 | C2orf67   | 151050 chromosome 2 open reading frame 67  | 1.24E-07 | 2 | 4.25 | 4.24 | 4.27 | 4.58 | 4.63 | 4.63 | 4.71 | 4.56 |
| TC0201621 | C2orf7    | 84279 chromosome 2 open reading frame 7    | 6.77E-05 | 2 | 4.56 | 4.79 | 4.82 | 4.87 | 4.88 | 4.85 | 4.83 | 4.78 |
| TC0300528 | C3orf1    | 51300 chromosome 3 open reading frame 1    | 1.66E-05 | 2 | 4.79 | 4.96 | 5.31 | 5.36 | 5.23 | 5.14 | 5.31 | 5.20 |
| TC0301902 | C3orf34   | 84984 chromosome 3 open reading frame 34   | 3.82E-06 | 2 | 7.73 | 7.65 | 8.12 | 8.37 | 8.29 | 8.56 | 8.56 | 8.60 |
| TC0300687 | C3orf58   | 205428 chromosome 3 open reading frame 58  | 5.29E-13 | 2 | 4.94 | 5.49 | 5.80 | 6.03 | 5.92 | 5.85 | 5.86 | 5.77 |
| TC0300262 | C3orf60   | 25915 chromosome 3 open reading frame 60   | 0.000103 | 2 | 4.86 | 5.19 | 5.16 | 5.26 | 5.38 | 5.33 | 5.21 | 5.22 |
| TC0400976 | C4orf14   | 84273 chromosome 4 open reading frame 14   | 2.29E-06 | 2 | 3.92 | 3.72 | 3.95 | 4.16 | 4.11 | 4.09 | 4.22 | 4.18 |
| TC0400648 | C4orf43   | 55319 chromosome 4 open reading frame 43   | 2.09E-05 | 2 | 4.22 | 4.34 | 4.25 | 4.32 | 4.57 | 4.60 | 4.59 | 4.40 |
| TC0500732 | C5orf25   | 375484 chromosome 5 open reading frame 25  | 6.88E-07 | 2 | 4.54 | 4.56 | 4.55 | 4.68 | 4.71 | 4.74 | 4.76 | 4.72 |
| TC0600765 | C6orf115  | 58527 chromosome 6 open reading frame 115  | 3.03E-12 | 2 | 4.56 | 4.97 | 5.29 | 5.50 | 5.48 | 5.37 | 5.39 | 5.21 |
| TC0601188 | C6orf125  | 84300 chromosome 6 open reading frame 125  | 1.08E-07 | 2 | 3.76 | 4.05 | 3.84 | 4.45 | 4.85 | 4.96 | 4.71 | 4.39 |
| TC0601222 | C6orf129  | 154467 chromosome 6 open reading frame 129 | 5.44E-07 | 2 | 5.08 | 5.16 | 5.30 | 5.80 | 5.69 | 5.58 | 5.77 | 5.60 |
| TC0600054 | C6orf151  | 154007 chromosome 6 open reading frame 151 | 7.17E-07 | 2 | 5.19 | 5.21 | 5.42 | 5.63 | 5.57 | 5.65 | 5.70 | 5.65 |
| TC0601472 | C6orf167  | 253714 chromosome 6 open reading frame 167 | 0.000958 | 2 | 2.74 | 3.21 | 3.05 | 3.05 | 3.22 | 3.22 | 3.16 | 3.08 |
| TC0600707 | C6orf173  | 387103 chromosome 6 open reading frame 173 | 5.23E-09 | 2 | 3.46 | 4.14 | 4.05 | 4.55 | 5.14 | 4.99 | 4.75 | 4.15 |

|           |          |                                                        |          |   |      |      |      |      |       |       |      |      |
|-----------|----------|--------------------------------------------------------|----------|---|------|------|------|------|-------|-------|------|------|
| TC0600605 | C6orf203 | 51250 chromosome 6 open reading frame 203              | 1.19E-07 | 2 | 4.23 | 4.37 | 4.46 | 4.65 | 4.83  | 4.74  | 4.84 | 4.63 |
| TC0600822 | C6orf211 | 79624 chromosome 6 open reading frame 211              | 3.30E-05 | 2 | 5.36 | 5.64 | 5.81 | 6.00 | 5.76  | 5.90  | 5.96 | 5.96 |
| TC0600496 | C6orf57  | 135154 chromosome 6 open reading frame 57              | 0.000603 | 2 | 2.99 | 3.24 | 3.18 | 3.28 | 3.39  | 3.36  | 3.30 | 3.27 |
| TC0701153 | C7orf11  | 136647 chromosome 7 open reading frame 11              | 1.10E-16 | 2 | 4.97 | 5.81 | 6.02 | 6.15 | 6.10  | 6.10  | 6.13 | 6.05 |
| TC0701106 | C7orf24  | 79017 chromosome 7 open reading frame 24               | 8.92E-08 | 2 | 3.78 | 3.75 | 3.72 | 4.00 | 4.32  | 4.31  | 4.36 | 4.21 |
| TC0701156 | C7orf25  | 79020 chromosome 7 open reading frame 25               | 0.000407 | 2 | 5.86 | 5.88 | 6.14 | 6.27 | 6.30  | 6.31  | 6.28 | 6.31 |
| TC0700741 | C7orf55  | 154791 chromosome 7 open reading frame 55              | 5.21E-09 | 2 | 3.98 | 4.09 | 4.21 | 4.39 | 4.66  | 4.58  | 4.40 | 4.30 |
| TC0800438 | C8orf38  | 137682 chromosome 8 open reading frame 38              | 0.00033  | 2 | 3.92 | 4.01 | 4.07 | 4.14 | 4.22  | 4.25  | 4.22 | 4.07 |
| TC0800862 | C8orf41  | 80185 chromosome 8 open reading frame 41               | 5.82E-06 | 2 | 5.20 | 5.12 | 5.32 | 5.44 | 5.28  | 5.38  | 5.47 | 5.45 |
| TC0801076 | C8orf59  | --- Uncharacterized protein C8orf59. [Source: Ensembl] | 5.31E-07 | 2 | 3.52 | 3.81 | 3.89 | 4.03 | 4.11  | 4.02  | 4.19 | 4.02 |
| TC0801225 | C8orf76  | /// ZH: 84933 /// chromosome 8 open reading frame 76   | 2.52E-06 | 2 | 5.02 | 5.30 | 5.41 | 5.41 | 5.37  | 5.38  | 5.49 | 5.43 |
| TC0900914 | C9orf105 | 401505 chromosome 9 open reading frame 105             | 3.73E-09 | 2 | 4.00 | 4.53 | 4.55 | 4.90 | 5.10  | 4.98  | 5.05 | 4.81 |
| TC0901163 | C9orf21  | 195827 chromosome 9 open reading frame 21              | 6.58E-08 | 2 | 3.97 | 4.17 | 4.17 | 4.40 | 4.41  | 4.46  | 4.46 | 4.50 |
| TC0901049 | C9orf40  | 55071 chromosome 9 open reading frame 40               | 1.94E-15 | 2 | 4.84 | 4.79 | 5.14 | 5.65 | 5.76  | 6.14  | 6.02 | 6.00 |
| TC0901050 | C9orf41  | 138199 chromosome 9 open reading frame 41              | 9.23E-05 | 2 | 3.90 | 3.90 | 3.85 | 4.02 | 4.09  | 4.08  | 4.21 | 4.05 |
| TC0901229 | C9orf5   | 23731 chromosome 9 open reading frame 5                | 1.16E-09 | 2 | 4.05 | 4.01 | 4.00 | 4.40 | 4.45  | 4.38  | 4.52 | 4.29 |
| TC0101302 | CACYBP   | 27101 calyculin binding protein                        | 1.10E-09 | 2 | 5.20 | 5.18 | 5.39 | 5.46 | 5.56  | 5.60  | 5.74 | 5.65 |
| TC1900657 | CALM3    | 808 calmodulin 3 (phosphorylase kinase, delta)         | 0.000904 | 2 | 8.71 | 8.78 | 8.75 | 8.99 | 8.94  | 8.94  | 8.95 | 9.03 |
| TC0700682 | CALU     | 813 calumenin /// Calumenin precursor (Cr)             | 2.87E-09 | 2 | 4.34 | 4.43 | 4.37 | 4.83 | 4.96  | 5.01  | 5.05 | 4.76 |
| TC1201638 | CAMKK2   | 10645 calcium/calmodulin-dependent protein kinase      | 1.55E-07 | 2 | 6.73 | 6.90 | 7.04 | 7.33 | 7.31  | 7.09  | 7.06 | 6.86 |
| TC0500485 | CAMLG    | 819 calcium modulating ligand                          | 5.02E-10 | 2 | 5.60 | 6.11 | 6.41 | 6.46 | 6.29  | 6.41  | 6.49 | 6.45 |
| TC0300249 | CAMP     | 820 cathelicidin antimicrobial peptide                 | 5.43E-18 | 2 | 7.12 | 9.76 | 9.06 | 9.49 | 10.10 | 10.35 | 9.85 | 9.40 |
| TC1200496 | CAND1    | 55832 cullin-associated and neddylation-dissociation   | 1.78E-08 | 2 | 3.72 | 3.81 | 3.93 | 4.27 | 4.42  | 4.40  | 4.43 | 4.20 |
| TC0500775 | CANX     | 821 calnexin /// Calnexin precursor (Major)            | 3.09E-14 | 2 | 7.75 | 8.22 | 8.16 | 8.64 | 8.80  | 8.81  | 8.80 | 8.46 |
| TC0101544 | CAPN2    | 824 calpain 2, (m/II) large subunit /// Calpa          | 0.000344 | 2 | 4.69 | 5.07 | 5.08 | 5.59 | 5.48  | 5.31  | 5.41 | 5.29 |
| TC1100269 | CAPRIN1  | 4076 cell cycle associated protein 1 /// Capri         | 7.47E-06 | 2 | 7.43 | 7.51 | 7.49 | 7.69 | 7.64  | 7.74  | 7.75 | 7.77 |
| TC1500289 | CASC4    | 113201 cancer susceptibility candidate 4 /// Pr        | 1.68E-09 | 2 | 8.49 | 8.67 | 9.02 | 9.05 | 8.90  | 8.98  | 8.92 | 8.87 |
| TC1500238 | CASC5    | 57082 cancer susceptibility candidate 5 /// Pr         | 3.32E-08 | 2 | 3.36 | 3.72 | 3.76 | 4.09 | 4.44  | 4.27  | 4.21 | 3.89 |
| TC0200993 | CASP10   | 843 caspase 10, apoptosis-related cysteine p           | 2.41E-10 | 2 | 4.78 | 4.95 | 4.63 | 5.14 | 5.48  | 5.41  | 5.44 | 5.20 |
| TC0401186 | CASP6    | 839 caspase 6, apoptosis-related cysteine p            | 0.000217 | 2 | 4.30 | 4.36 | 4.39 | 4.55 | 4.61  | 4.47  | 4.63 | 4.50 |
| TC1001057 | CBARA1   | 10367 calcium binding atopy-related autoanti           | 0.000451 | 2 | 6.47 | 6.54 | 6.61 | 6.81 | 6.77  | 6.69  | 6.69 | 6.58 |
| TC0301413 | CBLB     | 868 Cas-Br-M (murine) ecotropic retroviral             | 2.10E-05 | 2 | 4.16 | 4.12 | 4.12 | 4.33 | 4.30  | 4.33  | 4.41 | 4.38 |
| TC1201260 | CBX5     | 23468 chromobox homolog 5 (HP1 alpha hom               | 6.80E-07 | 2 | 4.32 | 5.27 | 4.93 | 5.32 | 5.66  | 5.58  | 5.47 | 5.07 |
| TC0200253 | CCDC104  | 112942 coiled-coil domain containing 104 /// C         | 2.37E-05 | 2 | 4.43 | 4.71 | 4.67 | 4.64 | 4.46  | 4.67  | 4.99 | 4.86 |

|           |          |                                                    |          |   |      |      |      |      |      |      |      |      |
|-----------|----------|----------------------------------------------------|----------|---|------|------|------|------|------|------|------|------|
| TC1000331 | CCDC109A | 90550 coiled-coil domain containing 109A ///       | 7.38E-09 | 2 | 5.73 | 5.55 | 5.62 | 5.94 | 6.16 | 6.07 | 6.04 | 5.81 |
| TC0501220 | CCDC112  | 153733 coiled-coil domain containing 112           | 6.91E-06 | 2 | 4.35 | 4.35 | 4.64 | 4.83 | 4.61 | 4.71 | 4.95 | 4.88 |
| TC0201395 | CCDC121  | 79635 coiled-coil domain containing 121            | 4.80E-06 | 2 | 4.64 | 4.53 | 4.83 | 4.84 | 4.78 | 4.91 | 4.99 | 4.95 |
| TC0200566 | CCDC138  | 165055 coiled-coil domain containing 138           | 0.000661 | 2 | 2.36 | 2.43 | 2.53 | 2.56 | 2.65 | 2.54 | 2.60 | 2.52 |
| TC0301503 | CCDC14   | 64770 coiled-coil domain containing 14             | 8.95E-05 | 2 | 3.80 | 3.81 | 3.95 | 4.13 | 4.22 | 4.16 | 4.25 | 4.06 |
| TC0100735 | CCDC18   | 343099 coiled-coil domain containing 18 /// Co     | 1.44E-08 | 2 | 4.20 | 4.82 | 4.94 | 5.31 | 5.28 | 5.19 | 5.20 | 4.89 |
| TC0800828 | CCDC25   | 55246 coiled-coil domain containing 25 /// Co      | 8.29E-07 | 2 | 3.64 | 3.83 | 3.88 | 4.02 | 4.01 | 4.10 | 4.23 | 4.06 |
| TC1701431 | CCDC43   | 124808 coiled-coil domain containing 43            | 0.000107 | 2 | 4.47 | 4.82 | 5.02 | 5.21 | 5.24 | 5.24 | 5.22 | 5.01 |
| TC1800165 | CCDC5    | 115106 coiled-coil domain containing 5 (spindl     | 3.06E-10 | 2 | 4.45 | 4.78 | 4.75 | 5.13 | 5.29 | 5.28 | 5.33 | 5.18 |
| TC1701389 | CCDC56   | 28958 coiled-coil domain containing 56             | 1.07E-08 | 2 | 5.32 | 6.10 | 6.07 | 6.46 | 6.57 | 6.53 | 6.60 | 6.31 |
| TC1001001 | CCDC6    | 8030 coiled-coil domain containing 6               | 4.26E-07 | 2 | 3.77 | 4.03 | 3.88 | 4.40 | 4.53 | 4.47 | 4.52 | 4.21 |
| TC0300323 | CCDC66   | 285331 coiled-coil domain containing 66 /// co     | 0.000272 | 2 | 4.13 | 4.58 | 4.58 | 4.57 | 4.57 | 4.67 | 4.75 | 4.63 |
| TC0501419 | CCDC69   | 26112 coiled-coil domain containing 69 /// co      | 8.17E-07 | 2 | 6.87 | 6.81 | 6.73 | 7.31 | 7.17 | 7.05 | 7.07 | 7.03 |
| TC1101293 | CCDC73   | 493860 coiled-coil domain containing 73 /// Co     | 0.000697 | 2 | 2.09 | 2.34 | 2.54 | 2.57 | 2.49 | 2.55 | 2.42 | 2.50 |
| TC0200178 | CCDC75   | 253635 coiled-coil domain containing 75 /// Co     | 4.40E-10 | 2 | 4.51 | 4.51 | 4.43 | 4.61 | 4.83 | 4.86 | 5.10 | 4.84 |
| TC0100766 | CCDC76   | 54482 coiled-coil domain containing 76 /// Co      | 1.11E-08 | 2 | 3.28 | 3.11 | 3.25 | 3.48 | 3.57 | 3.50 | 3.57 | 3.40 |
| TC0201524 | CCDC88A  | 55704 coiled-coil domain containing 88A /// C      | 4.06E-06 | 2 | 3.38 | 3.83 | 3.75 | 3.99 | 4.06 | 4.11 | 4.28 | 4.00 |
| TC0600961 | CCDC90A  | 63933 coiled-coil domain containing 90A /// c      | 2.41E-13 | 2 | 3.32 | 3.98 | 3.90 | 4.65 | 5.22 | 5.27 | 5.04 | 4.82 |
| TC0401092 | CCDC98   | 84142 coiled-coil domain containing 98 /// Co      | 1.26E-11 | 2 | 4.43 | 4.62 | 4.66 | 4.99 | 4.96 | 4.98 | 5.06 | 4.89 |
| TC0500690 | CCDC99   | 54908 coiled-coil domain containing 99 /// Co      | 7.16E-05 | 2 | 3.14 | 3.40 | 3.30 | 3.56 | 3.79 | 3.68 | 3.73 | 3.55 |
| TC1701251 | CCL23    | 6368 chemokine (C-C motif) ligand 23               | 3.69E-13 | 2 | 3.58 | 3.42 | 3.73 | 4.70 | 4.22 | 4.95 | 5.29 | 5.28 |
| TC1701252 | CCL3     | 730422 // chemokine (C-C motif) ligand 3           | 0.000459 | 2 | 4.87 | 5.08 | 4.98 | 5.16 | 5.03 | 5.21 | 5.28 | 5.25 |
| TC1700383 | CCL4     | 6351 chemokine (C-C motif) ligand 4                | 3.50E-05 | 2 | 4.55 | 4.88 | 4.56 | 5.39 | 5.12 | 5.46 | 5.90 | 5.94 |
| TC1701244 | CCL5     | 6352 chemokine (C-C motif) ligand 5                | 2.80E-05 | 2 | 5.61 | 5.54 | 4.99 | 6.30 | 6.73 | 7.15 | 6.63 | 6.97 |
| TC0401233 | CCNA2    | 890 cyclin A2                                      | 3.41E-10 | 2 | 3.21 | 3.41 | 3.27 | 3.81 | 4.29 | 4.31 | 4.11 | 3.74 |
| TC0500232 | CCNB1    | 891 cyclin B1 /// G2/mitotic-specific cyclin-l     | 1.49E-05 | 2 | 3.30 | 3.45 | 3.34 | 3.63 | 3.87 | 3.81 | 3.71 | 3.59 |
| TC1500373 | CCNB2    | 9133 cyclin B2                                     | 8.22E-08 | 2 | 2.96 | 3.13 | 3.14 | 3.58 | 3.92 | 3.88 | 3.71 | 3.33 |
| TC1200030 | CCND2    | 894 cyclin D2                                      | 1.71E-16 | 2 | 4.82 | 4.70 | 4.26 | 5.32 | 5.52 | 5.53 | 5.48 | 5.28 |
| TC0801128 | CCNE2    | 9134 cyclin E2                                     | 5.55E-10 | 2 | 3.16 | 3.09 | 3.17 | 3.66 | 4.02 | 4.05 | 3.87 | 3.46 |
| TC0201050 | CCNYL1   | 151195 cyclin Y-like 1 /// cyclin Y-like 1 [Source | 1.42E-05 | 2 | 5.72 | 6.09 | 6.10 | 6.24 | 6.22 | 6.27 | 6.16 | 6.17 |
| TC1200510 | CCT2     | 10576 chaperonin containing TCP1, subunit 2        | 3.37E-09 | 2 | 4.66 | 4.82 | 4.74 | 5.16 | 5.38 | 5.38 | 5.44 | 5.16 |
| TC0102852 | CCT3     | 7203 chaperonin containing TCP1, subunit 3         | 0.000249 | 2 | 4.77 | 4.73 | 4.71 | 4.96 | 4.99 | 4.89 | 5.07 | 4.88 |
| TC0201550 | CCT4     | 10575 chaperonin containing TCP1, subunit 4        | 8.65E-08 | 2 | 3.97 | 4.11 | 4.24 | 4.43 | 4.60 | 4.60 | 4.68 | 4.44 |
| TC0700270 | CCT6A    | 908 chaperonin containing TCP1, subunit 6          | 1.34E-06 | 2 | 4.17 | 4.27 | 4.33 | 4.52 | 4.70 | 4.72 | 4.83 | 4.62 |

|           |                         |        |                                             |          |   |      |      |      |      |      |      |      |      |
|-----------|-------------------------|--------|---------------------------------------------|----------|---|------|------|------|------|------|------|------|------|
| TC0200342 | CCT7                    | 10574  | chaperonin containing TCP1, subunit 7       | 7.38E-05 | 2 | 5.30 | 5.35 | 5.58 | 5.68 | 5.65 | 5.64 | 5.77 | 5.55 |
| TC2100262 | CCT8                    | 10694  | chaperonin containing TCP1, subunit 8       | 8.05E-07 | 2 | 4.18 | 4.54 | 4.65 | 4.90 | 4.94 | 4.91 | 5.00 | 4.77 |
| TC0301451 | CD200R1                 | 131450 | CD200 receptor 1                            | 7.48E-06 | 2 | 3.67 | 3.98 | 3.84 | 4.10 | 4.44 | 4.54 | 4.49 | 4.38 |
| TC1800535 | CD226                   | 10666  | CD226 molecule                              | 0.000133 | 2 | 3.61 | 4.10 | 3.86 | 4.77 | 5.09 | 5.11 | 4.74 | 4.78 |
| TC0Y00162 | CD24                    | 934    | CD24 molecule                               | 4.08E-16 | 2 | 4.21 | 6.17 | 5.78 | 7.15 | 7.50 | 7.61 | 7.03 | 6.52 |
| TC0900039 | CD274                   | 29126  | CD274 molecule /// Programmed cell d        | 2.30E-05 | 2 | 4.95 | 5.58 | 5.61 | 6.56 | 6.22 | 6.64 | 6.58 | 6.44 |
| TC0600438 | CD2AP                   | 23607  | CD2-associated protein                      | 4.53E-10 | 2 | 4.79 | 5.06 | 4.80 | 5.42 | 5.17 | 5.54 | 6.05 | 5.97 |
| TC0301426 | CD47                    | 961    | CD47 molecule /// Leukocyte surface a       | 1.24E-09 | 2 | 6.44 | 6.50 | 6.75 | 6.91 | 6.96 | 7.04 | 7.14 | 7.00 |
| TC1200960 | CD69                    | 969    | CD69 molecule                               | 0.000262 | 2 | 2.88 | 3.18 | 2.93 | 3.63 | 3.32 | 3.55 | 3.97 | 3.91 |
| TC0600088 | CD83                    | 9308   | CD83 molecule                               | 0.000102 | 2 | 4.23 | 4.47 | 4.39 | 4.50 | 4.52 | 4.56 | 4.55 | 4.52 |
| TC0901162 | CDC14B /// CD           | 8555   | CDC14 cell division cycle 14 homolog B      | 5.28E-11 | 2 | 3.62 | 3.74 | 3.64 | 3.81 | 4.05 | 4.08 | 3.94 | 4.00 |
| TC1300298 | CDC16                   | 8881   | cell division cycle 16 homolog (S. cerevi   | 3.25E-06 | 2 | 4.58 | 4.44 | 4.53 | 4.72 | 4.77 | 4.79 | 4.90 | 4.79 |
| TC1000271 | CDC2                    | 983    | cell division cycle 2, G1 to S and G2 to M  | 8.77E-07 | 2 | 2.42 | 2.55 | 2.50 | 2.71 | 3.03 | 2.98 | 2.82 | 2.65 |
| TC0100467 | CDC20                   | 991    | cell division cycle 20 homolog (S. cerevi   | 0.000606 | 2 | 4.34 | 4.33 | 4.25 | 4.36 | 4.48 | 4.47 | 4.40 | 4.32 |
| TC0900022 | CDC37L1                 | 55664  | cell division cycle 37 homolog (S. cerevi   | 2.98E-07 | 2 | 4.84 | 4.84 | 4.94 | 5.10 | 5.02 | 5.19 | 5.28 | 5.22 |
| TC2200035 | CDC45L                  | 8318   | CDC45 cell division cycle 45-like (S. cere  | 3.12E-07 | 2 | 3.72 | 3.87 | 3.79 | 3.94 | 4.27 | 4.21 | 4.15 | 3.95 |
| TC1700433 | CDC6                    | 990    | cell division cycle 6 homolog (S. cerevis   | 1.81E-08 | 2 | 3.08 | 3.25 | 3.11 | 3.48 | 4.01 | 3.94 | 3.82 | 3.48 |
| TC0100717 | CDC7                    | 8317   | cell division cycle 7 homolog (S. cerevis   | 2.72E-06 | 2 | 3.35 | 3.43 | 3.34 | 3.45 | 3.69 | 3.65 | 3.63 | 3.53 |
| TC0800160 | CDCA2                   | 157313 | cell division cycle associated 2 /// Cell c | 1.55E-05 | 2 | 2.70 | 2.77 | 2.77 | 2.89 | 3.12 | 3.09 | 2.99 | 2.92 |
| TC1401163 | CDCA4                   | 55038  | cell division cycle associated 4            | 0.000391 | 2 | 4.19 | 4.51 | 4.52 | 4.52 | 4.62 | 4.60 | 4.55 | 4.51 |
| TC0200868 | CDCA7                   | 83879  | cell division cycle associated 7            | 2.08E-05 | 2 | 3.96 | 4.08 | 4.05 | 4.13 | 4.34 | 4.36 | 4.23 | 4.15 |
| TC0701049 | CDCA7L                  | 732169 | // cell division cycle associated 7-like    | 1.49E-08 | 2 | 4.41 | 5.60 | 5.07 | 5.57 | 6.21 | 6.23 | 5.98 | 5.52 |
| TC0100402 | CDCA8                   | 55143  | cell division cycle associated 8            | 8.63E-05 | 2 | 4.16 | 4.17 | 4.05 | 4.20 | 4.37 | 4.40 | 4.40 | 4.36 |
| TC1201658 | CDK2AP1                 | 8099   | CDK2-associated protein 1                   | 6.25E-12 | 2 | 4.59 | 4.83 | 4.83 | 5.28 | 5.41 | 5.40 | 5.41 | 5.31 |
| TC1201327 | CDK4                    | 1019   | cyclin-dependent kinase 4 /// Cell divisi   | 4.21E-08 | 2 | 4.38 | 4.55 | 4.37 | 4.71 | 5.03 | 5.09 | 4.94 | 4.79 |
| TC0701414 | CDK6                    | 1021   | cyclin-dependent kinase 6                   | 1.82E-11 | 2 | 3.98 | 3.99 | 4.03 | 4.25 | 4.48 | 4.52 | 4.56 | 4.44 |
| TC0100539 | CDKN2C                  | 1031   | cyclin-dependent kinase inhibitor 2C (p     | 2.89E-09 | 2 | 3.62 | 3.83 | 4.28 | 4.39 | 4.39 | 4.16 | 4.15 | 3.94 |
| TC1400236 | CDKN3                   | 1033   | cyclin-dependent kinase inhibitor 3 (CD     | 1.14E-10 | 2 | 3.32 | 3.57 | 3.73 | 4.11 | 4.46 | 4.24 | 4.07 | 3.79 |
| TC1600935 | CDR2                    | 1039   | cerebellar degeneration-related protein     | 2.68E-06 | 2 | 4.16 | 4.75 | 4.70 | 4.78 | 5.05 | 4.80 | 4.81 | 4.60 |
| TC1600667 | CDT1                    | 81620  | chromatin licensing and DNA replicatio      | 4.50E-05 | 2 | 4.60 | 4.77 | 4.75 | 4.78 | 4.88 | 4.92 | 4.84 | 4.81 |
| TC0300634 | CDV3                    | 55573  | CDV3 homolog (mouse)                        | 3.59E-05 | 2 | 7.87 | 8.19 | 8.24 | 8.21 | 8.14 | 8.24 | 8.24 | 8.28 |
| TC1900559 | CEACAM6 /// C4680 /// 1 |        | carcinoembryonic antigen-related cell a     | 2.61E-17 | 2 | 3.74 | 4.66 | 4.23 | 4.93 | 5.31 | 5.36 | 5.08 | 4.76 |
| TC1901554 | CEACAM8                 | 1088   | carcinoembryonic antigen-related cell a     | 1.62E-20 | 2 | 4.09 | 7.62 | 6.23 | 8.11 | 8.99 | 9.19 | 8.44 | 7.64 |
| TC1400715 | CEBPE                   | 1053   | CCAAT/enhancer binding protein (C/EB        | 2.59E-18 | 2 | 5.60 | 5.68 | 5.48 | 6.35 | 6.57 | 6.65 | 6.42 | 6.42 |

|           |                         |           |                                            |          |   |      |      |      |      |      |      |      |      |
|-----------|-------------------------|-----------|--------------------------------------------|----------|---|------|------|------|------|------|------|------|------|
| TC2200415 | CECR1                   | 51816     | cat eye syndrome chromosome region,        | 0.00024  | 2 | 4.19 | 4.20 | 4.11 | 4.41 | 4.26 | 4.39 | 4.50 | 4.38 |
| TC0401163 | CENPE                   | 1062      | centromere protein E, 312kDa /// Cent      | 0.000807 | 2 | 2.62 | 3.12 | 2.90 | 3.03 | 3.40 | 3.29 | 3.29 | 3.03 |
| TC0101512 | CENPF                   | 1063      | centromere protein F, 350/400ka (mito      | 4.64E-07 | 2 | 3.25 | 3.48 | 3.32 | 3.77 | 4.29 | 4.22 | 4.26 | 3.72 |
| TC1300347 | CENPJ                   | 55835     | centromere protein J                       | 4.20E-05 | 2 | 3.35 | 3.34 | 3.29 | 3.53 | 3.77 | 3.70 | 3.85 | 3.61 |
| TC0501026 | CENPK                   | 64105     | centromere protein K                       | 6.74E-09 | 2 | 3.34 | 3.47 | 3.46 | 3.77 | 4.21 | 4.21 | 4.11 | 3.82 |
| TC2200715 | CENPM                   | 79019     | centromere protein M                       | 0.000851 | 2 | 4.97 | 4.97 | 4.99 | 5.02 | 5.15 | 5.11 | 5.04 | 4.95 |
| TC1600613 | CENPN                   | 55839     | centromere protein N                       | 4.60E-10 | 2 | 3.63 | 3.89 | 3.74 | 4.07 | 4.49 | 4.45 | 4.43 | 4.07 |
| TC1201430 | CEP290                  | 80184     | centrosomal protein 290kDa                 | 0.00024  | 2 | 2.78 | 2.83 | 2.86 | 2.92 | 2.95 | 2.96 | 3.06 | 3.01 |
| TC1000453 | CEP55                   | 55165     | centrosomal protein 55kDa /// Centros      | 2.85E-06 | 2 | 2.86 | 3.12 | 3.04 | 3.37 | 3.78 | 3.63 | 3.50 | 3.29 |
| TC1100774 | CEP57                   | 9702      | centrosomal protein 57kDa /// Centros      | 4.20E-05 | 2 | 4.87 | 5.18 | 5.04 | 5.16 | 5.18 | 5.27 | 5.40 | 5.31 |
| TC0900313 | CEP78                   | 84131     | centrosomal protein 78kDa /// Centros      | 0.000183 | 2 | 3.07 | 3.02 | 3.00 | 3.10 | 3.34 | 3.21 | 3.37 | 3.12 |
| TC0300461 | CEP97 /// LRRH          | 79598     | centrosomal protein 97kDa /// Leucine      | 9.03E-09 | 2 | 4.88 | 5.09 | 5.25 | 5.69 | 5.86 | 5.76 | 5.75 | 5.51 |
| TC0X01361 | CETN2                   | 1069      | centrin, EF-hand protein, 2                | 2.01E-06 | 2 | 5.93 | 6.59 | 6.76 | 6.69 | 6.70 | 6.83 | 6.81 | 6.73 |
| TC0501137 | CETN3                   | 1070      | centrin, EF-hand protein, 3 (CDC31 hon     | 5.63E-06 | 2 | 3.48 | 3.94 | 4.10 | 4.09 | 4.26 | 4.36 | 4.49 | 4.18 |
| TC1601264 | CFDP1                   | 10428     | craniofacial development protein 1         | 8.45E-15 | 2 | 7.19 | 7.20 | 7.31 | 7.65 | 7.73 | 7.87 | 8.00 | 7.85 |
| TC1900091 | CHAF1A                  | 10036     | chromatin assembly factor 1, subunit A     | 1.78E-06 | 2 | 5.34 | 5.51 | 5.43 | 5.56 | 5.67 | 5.64 | 5.66 | 5.61 |
| TC1000345 | CHCHD1                  | 118487    | coiled-coil-helix-coiled-coil-helix domai  | 6.88E-14 | 2 | 4.66 | 5.35 | 5.64 | 5.82 | 5.77 | 5.65 | 5.66 | 5.50 |
| TC2200512 | CHCHD10                 | 646106 // | coiled-coil-helix-coiled-coil-helix domai  | 0.000597 | 2 | 5.70 | 6.07 | 5.90 | 6.03 | 6.04 | 6.01 | 6.12 | 5.92 |
| TC0701646 | CHCHD3                  | 54927     | coiled-coil-helix-coiled-coil-helix domai  | 3.68E-05 | 2 | 4.45 | 5.33 | 5.10 | 5.26 | 5.30 | 5.27 | 5.33 | 5.18 |
| TC0100952 | CHD1L                   | 9557      | chromodomain helicase DNA binding p        | 1.05E-09 | 2 | 3.69 | 4.10 | 4.05 | 4.48 | 4.86 | 4.70 | 4.64 | 4.33 |
| TC1100978 | CHEK1                   | 1111      | CHK1 checkpoint homolog (S. pombe)         | 5.60E-07 | 2 | 3.03 | 3.16 | 3.08 | 3.32 | 3.67 | 3.56 | 3.58 | 3.29 |
| TC1101052 | CHID1                   | 66005     | chitinase domain containing 1 /// Chiti    | 0.000665 | 2 | 5.51 | 5.50 | 5.46 | 5.57 | 5.69 | 5.63 | 5.61 | 5.54 |
| TC0103141 | CHIT1                   | 1118      | chitinase 1 (chitotriosidase) /// Chitotri | 1.03E-07 | 2 | 4.33 | 5.19 | 4.76 | 5.31 | 5.97 | 5.92 | 5.43 | 4.97 |
| TC0900126 | CHMP5 /// BAC           | 51510     | chromatin modifying protein 5 /// BAG      | 6.85E-07 | 2 | 7.91 | 7.99 | 8.12 | 8.34 | 8.18 | 8.39 | 8.42 | 8.52 |
| TC0800579 | CHRAC1                  | 54108     | chromatin accessibility complex 1          | 1.37E-05 | 2 | 4.78 | 5.01 | 4.82 | 5.06 | 5.12 | 5.20 | 5.20 | 5.14 |
| TC0700021 | CHST12                  | 55501     | carbohydrate (chondroitin 4) sulfotran:    | 6.43E-08 | 2 | 6.08 | 6.45 | 6.43 | 6.55 | 6.51 | 6.51 | 6.52 | 6.41 |
| TC1400303 | CHURC1 /// FN 91612 /// | 91612 /// | churchill domain containing 1 /// farne    | 0.00025  | 2 | 4.97 | 5.03 | 5.05 | 5.15 | 5.11 | 5.18 | 5.19 | 5.21 |
| TC1400744 | CIDEB                   | 27141     | cell death-inducing DFFA-like effector b   | 1.65E-07 | 2 | 5.68 | 5.64 | 5.77 | 6.17 | 6.12 | 5.98 | 6.09 | 5.89 |
| TC1600550 | CIRH1A                  | 84916     | cirrrosis, autosomal recessive 1A (cirhi   | 0.000375 | 2 | 3.74 | 3.92 | 3.93 | 4.05 | 4.15 | 4.09 | 4.13 | 4.07 |
| TC1201615 | CIT                     | 11113     | citron (rho-interacting, serine/threonin   | 0.000194 | 2 | 3.34 | 3.41 | 3.39 | 3.51 | 3.71 | 3.64 | 3.64 | 3.49 |
| TC0601648 | CITED2                  | 10370     | Cbp/p300-interacting transactivator, w     | 3.39E-11 | 2 | 5.53 | 5.95 | 5.86 | 6.36 | 6.77 | 6.65 | 6.57 | 6.31 |
| TC1300164 | CKAP2                   | 26586     | cytoskeleton associated protein 2 /// C    | 1.27E-11 | 2 | 3.98 | 4.23 | 4.04 | 4.72 | 5.13 | 5.12 | 5.14 | 4.86 |
| TC0201830 | CKAP2L                  | 150468    | cytoskeleton associated protein 2-like     | 3.72E-06 | 2 | 2.88 | 3.11 | 3.02 | 3.23 | 3.58 | 3.55 | 3.45 | 3.23 |
| TC1101339 | CKAP5                   | 9793      | cytoskeleton associated protein 5 /// C    | 7.14E-13 | 2 | 3.96 | 3.98 | 3.85 | 4.51 | 4.79 | 4.72 | 4.81 | 4.47 |



|           |               |                                                  |          |   |       |       |       |       |       |       |       |       |
|-----------|---------------|--------------------------------------------------|----------|---|-------|-------|-------|-------|-------|-------|-------|-------|
| TC0101105 | CKS1B         | 732142 // CDC28 protein kinase regulatory subun  | 9.81E-10 | 2 | 4.27  | 4.52  | 4.38  | 4.65  | 4.90  | 4.87  | 4.73  | 4.66  |
| TC0900366 | CKS2          | 1164 CDC28 protein kinase regulatory subun       | 7.14E-10 | 2 | 4.75  | 5.10  | 5.09  | 5.48  | 5.96  | 6.06  | 5.90  | 5.85  |
| TC1200965 | CLEC1B        | 51266 C-type lectin domain family 1, member      | 0.000503 | 2 | 4.80  | 5.57  | 5.46  | 6.17  | 6.30  | 6.11  | 5.90  | 5.79  |
| TC0100268 | CLIC4         | 25932 chloride intracellular channel 4           | 3.92E-08 | 2 | 4.38  | 5.25  | 5.20  | 5.70  | 5.63  | 5.52  | 5.53  | 5.45  |
| TC1101686 | CLNS1A        | 1207 chloride channel, nucleotide-sensitive,     | 1.04E-12 | 2 | 4.51  | 5.54  | 5.55  | 5.95  | 6.04  | 6.02  | 6.09  | 5.97  |
| TC1101640 | CLPB          | 81570 ClpB caseinolytic peptidase B homolog      | 0.00094  | 2 | 4.31  | 4.53  | 4.40  | 4.55  | 4.72  | 4.62  | 4.59  | 4.42  |
| TC0102109 | CLSPN         | 63967 claspin homolog (Xenopus laevis) /// Cl    | 2.79E-09 | 2 | 3.91  | 4.10  | 4.10  | 4.47  | 4.82  | 4.75  | 4.73  | 4.35  |
| TC0900174 | CLTA          | 1211 clathrin, light chain (Lca)                 | 3.15E-06 | 2 | 5.90  | 5.98  | 5.99  | 6.07  | 6.15  | 6.25  | 6.28  | 6.16  |
| TC0501517 | CLTB          | 1212 clathrin, light chain (Lcb)                 | 2.39E-05 | 2 | 5.52  | 5.76  | 5.91  | 6.00  | 5.87  | 5.91  | 5.93  | 5.83  |
| TC2200435 | CLTCL1        | 8218 clathrin, heavy chain-like 1 /// Clathrin   | 1.42E-05 | 2 | 4.07  | 4.63  | 4.26  | 4.50  | 4.88  | 4.80  | 4.59  | 4.33  |
| TC0800827 | CLU           | 1191 clusterin                                   | 3.82E-06 | 2 | 5.17  | 5.61  | 5.64  | 6.33  | 6.53  | 6.37  | 6.08  | 5.99  |
| TC1200191 | CMAS          | 55907 cytidine monophosphate N-acetylneur:       | 1.49E-05 | 2 | 4.02  | 4.68  | 4.84  | 5.05  | 5.06  | 4.98  | 5.01  | 4.83  |
| TC0100523 | CMPK1 /// CMI | 51727 cytidine monophosphate (UMP-CMP) k         | 1.72E-06 | 2 | 5.07  | 5.42  | 5.52  | 5.71  | 5.82  | 5.77  | 5.79  | 5.64  |
| TC0300132 | CMTM7         | 112616 CKLF-like MARVEL transmembrane don        | 0.000102 | 2 | 5.44  | 5.58  | 5.74  | 5.92  | 5.87  | 5.75  | 5.86  | 5.72  |
| TC0500782 | CNOT6         | 57472 CCR4-NOT transcription complex, subu       | 0.000299 | 2 | 5.80  | 6.09  | 6.20  | 6.32  | 6.29  | 6.21  | 6.23  | 6.13  |
| TC1201292 | CNPY2         | 10330 canopy 2 homolog (zebrafish)               | 9.97E-10 | 2 | 4.95  | 4.86  | 4.80  | 5.19  | 5.31  | 5.31  | 5.43  | 5.26  |
| TC0101603 | COG2          | 22796 component of oligomeric golgi comple       | 1.74E-05 | 2 | 3.45  | 3.57  | 3.60  | 3.74  | 3.76  | 3.77  | 3.91  | 3.76  |
| TC1601204 | COG8 /// PDF  | 84342 /// component of oligomeric golgi comple   | 0.000616 | 2 | 3.90  | 3.85  | 3.99  | 4.10  | 4.06  | 3.98  | 4.04  | 4.02  |
| TC0301654 | COMMD2        | 51122 COMM domain containing 2                   | 0.000264 | 2 | 5.83  | 6.10  | 6.15  | 6.06  | 5.88  | 6.12  | 6.27  | 6.25  |
| TC0801349 | COMMD5        | 28991 COMM domain containing 5                   | 8.67E-07 | 2 | 5.27  | 5.41  | 5.43  | 5.57  | 5.58  | 5.56  | 5.52  | 5.55  |
| TC1300552 | COMMD6        | 170622 COMM domain containing 6                  | 3.91E-19 | 2 | 5.55  | 6.15  | 6.42  | 6.41  | 6.39  | 6.43  | 6.41  | 6.37  |
| TC2000665 | COMMD7        | 149951 COMM domain containing 7                  | 1.43E-05 | 2 | 4.87  | 5.32  | 5.44  | 5.48  | 5.67  | 5.72  | 5.71  | 5.58  |
| TC0400921 | COMMD8        | 54951 COMM domain containing 8 /// COMM          | 6.18E-11 | 2 | 4.73  | 5.41  | 5.76  | 5.82  | 5.69  | 5.71  | 5.83  | 5.77  |
| TC1500940 | COPS2         | 9318 COP9 constitutive photomorphogenic t        | 0.000241 | 2 | 5.32  | 5.79  | 5.78  | 5.84  | 5.80  | 5.89  | 5.98  | 5.94  |
| TC0901184 | CORO2A        | 7464 coronin, actin binding protein, 2A          | 5.06E-05 | 2 | 4.41  | 4.91  | 4.99  | 5.05  | 5.25  | 5.12  | 5.11  | 4.89  |
| TC1601304 | COTL1         | 23406 coactosin-like 1 (Dictyostelium)           | 0.000159 | 2 | 8.69  | 8.83  | 9.05  | 9.43  | 9.29  | 9.08  | 8.94  | 9.06  |
| TC0700944 | COX19         | 90639 COX19 cytochrome c oxidase assembly        | 0.000832 | 2 | 3.94  | 3.86  | 3.97  | 4.12  | 4.10  | 4.06  | 4.09  | 4.10  |
| TC1501108 | COX5A         | 9377 cytochrome c oxidase subunit Va             | 6.32E-12 | 2 | 6.94  | 7.79  | 7.92  | 8.19  | 8.31  | 8.35  | 8.35  | 8.13  |
| TC0200509 | COX5B         | 1329 cytochrome c oxidase subunit Vb             | 0.000501 | 2 | 4.91  | 5.14  | 5.22  | 5.32  | 5.35  | 5.32  | 5.28  | 5.33  |
| TC1200751 | COX6A1        | 1337 cytochrome c oxidase subunit VIa polyt      | 1.39E-05 | 2 | 9.19  | 9.59  | 9.64  | 9.79  | 9.81  | 9.79  | 9.79  | 9.79  |
| TC1900450 | COX6B1        | 1340 cytochrome c oxidase subunit VIb polyt      | 8.64E-08 | 2 | 10.58 | 10.84 | 10.98 | 11.09 | 11.04 | 11.04 | 11.03 | 11.03 |
| TC0X00375 | COX7B         | 1349 cytochrome c oxidase subunit VIIb           | 1.89E-14 | 2 | 8.13  | 8.85  | 9.01  | 8.98  | 8.92  | 8.98  | 9.02  | 8.97  |
| TC1001161 | CPEB3         | 22849 cytoplasmic polyadenylation element b      | 2.10E-05 | 2 | 3.96  | 4.04  | 4.18  | 4.39  | 4.21  | 4.13  | 4.26  | 4.13  |
| TC1600469 | CPNE2         | 221184 copine II /// Copine-2 (Copine II). [Sour | 4.08E-05 | 2 | 5.60  | 5.86  | 5.58  | 5.89  | 6.24  | 6.07  | 5.91  | 5.71  |

|           |                         |                                                 |          |   |      |      |      |      |      |       |      |      |
|-----------|-------------------------|-------------------------------------------------|----------|---|------|------|------|------|------|-------|------|------|
| TC0800417 | CPNE3                   | 8895 copine III                                 | 5.82E-17 | 2 | 6.92 | 8.42 | 8.33 | 8.65 | 8.98 | 8.88  | 8.51 | 8.16 |
| TC1400449 | CPSF2                   | 53981 cleavage and polyadenylation specific f   | 6.95E-14 | 2 | 5.77 | 6.28 | 6.49 | 6.76 | 6.65 | 6.65  | 6.67 | 6.48 |
| TC1200505 | CPSF6                   | 11052 cleavage and polyadenylation specific f   | 0.000219 | 2 | 5.77 | 5.74 | 5.87 | 6.05 | 6.05 | 5.92  | 6.03 | 5.93 |
| TC0701665 | CREB3L2                 | 64764 cAMP responsive element binding prot      | 0.000149 | 2 | 4.29 | 4.53 | 4.49 | 4.54 | 4.56 | 4.65  | 4.79 | 4.78 |
| TC0102964 | CREG1                   | 8804 cellular repressor of E1A-stimulated ge    | 4.17E-14 | 2 | 5.15 | 5.52 | 5.22 | 5.70 | 5.84 | 5.92  | 6.02 | 5.90 |
| TC1400638 | CRIP1 /// Q8N/          | 1396 cysteine-rich protein 1 (intestinal) /// C | 9.74E-07 | 2 | 5.91 | 6.06 | 6.09 | 6.33 | 6.32 | 6.44  | 6.61 | 6.44 |
| TC2200061 | CRKL                    | 1399 v-crk sarcoma virus CT10 oncogene hor      | 4.42E-06 | 2 | 6.69 | 6.95 | 7.01 | 7.09 | 6.98 | 7.09  | 7.03 | 7.09 |
| TC0300137 | CRTAP                   | 10491 cartilage associated protein              | 1.31E-09 | 2 | 3.93 | 4.09 | 4.03 | 4.33 | 4.42 | 4.43  | 4.40 | 4.33 |
| TC2000353 | CSE1L                   | 1434 CSE1 chromosome segregation 1-like (y      | 1.45E-08 | 2 | 4.78 | 4.66 | 4.72 | 4.99 | 5.18 | 5.25  | 5.18 | 5.15 |
| TC1501028 | CSNK1G1 /// KI53944 /// | casein kinase 1, gamma 1 /// KIAA0101           | 5.26E-05 | 2 | 4.34 | 4.65 | 4.60 | 4.67 | 4.67 | 4.76  | 4.69 | 4.64 |
| TC0500433 | CSNK1G3                 | 1456 casein kinase 1, gamma 3                   | 4.64E-11 | 2 | 6.16 | 6.83 | 7.03 | 7.19 | 6.86 | 7.06  | 7.05 | 6.95 |
| TC0800353 | CSPP1                   | 79848 centrosome and spindle pole associate     | 4.88E-07 | 2 | 4.16 | 4.40 | 4.55 | 4.76 | 4.73 | 4.63  | 4.66 | 4.56 |
| TC0103120 | CSRP1                   | 1465 cysteine and glycine-rich protein 1        | 7.35E-05 | 2 | 5.45 | 5.57 | 5.58 | 5.74 | 5.79 | 5.69  | 5.70 | 5.64 |
| TC0300550 | CSTA                    | 1475 cystatin A (stefin A)                      | 0.000505 | 2 | 9.36 | 9.78 | 9.66 | 9.88 | 9.83 | 10.01 | 9.95 | 9.87 |
| TC2100385 | CSTB                    | 1476 cystatin B (stefin B)                      | 4.45E-12 | 2 | 7.03 | 7.44 | 7.59 | 7.75 | 7.72 | 7.71  | 7.50 | 7.56 |
| TC1101295 | CSTF3                   | 1479 cleavage stimulation factor, 3' pre-RNA    | 6.56E-07 | 2 | 4.01 | 4.34 | 4.54 | 4.68 | 4.81 | 4.73  | 4.77 | 4.50 |
| TC0300154 | CTDSPL                  | 10217 CTD (carboxy-terminal domain, RNA po      | 9.88E-11 | 2 | 4.75 | 5.05 | 4.95 | 5.22 | 5.61 | 5.52  | 5.33 | 5.17 |
| TC0901227 | CTNNA1                  | 8727 catenin (cadherin-associated protein), c   | 2.65E-06 | 2 | 3.26 | 3.40 | 3.28 | 3.51 | 3.73 | 3.69  | 3.66 | 3.54 |
| TC0X00790 | CTPS2                   | 56474 CTP synthase II /// CTP synthase 2 (EC 6  | 0.000545 | 2 | 3.74 | 3.76 | 3.74 | 3.82 | 3.90 | 3.83  | 3.88 | 3.81 |
| TC2000328 | CTSA                    | 5476 cathepsin A /// Lysosomal protective pi    | 2.77E-09 | 2 | 6.47 | 6.59 | 6.64 | 7.27 | 7.20 | 7.01  | 6.94 | 6.90 |
| TC1400751 | CTSG                    | 1511 cathepsin G                                | 1.31E-14 | 2 | 3.99 | 6.12 | 5.07 | 6.89 | 7.77 | 7.91  | 7.37 | 6.62 |
| TC0700851 | CUL1                    | 8454 cullin 1                                   | 6.86E-05 | 2 | 4.78 | 5.04 | 5.01 | 5.19 | 5.25 | 5.20  | 5.31 | 5.14 |
| TC1300292 | CUL4A                   | 8451 cullin 4A /// Cullin-4A (CUL-4A). [Source  | 1.44E-05 | 2 | 4.97 | 4.90 | 4.96 | 5.11 | 5.17 | 5.18  | 5.26 | 5.05 |
| TC1100821 | CUL5                    | 8065 cullin 5                                   | 4.12E-05 | 2 | 3.71 | 4.26 | 4.41 | 4.40 | 4.40 | 4.40  | 4.54 | 4.29 |
| TC1101751 | CWC15                   | 51503 CWC15 homolog (S. cerevisiae)             | 5.95E-06 | 2 | 7.52 | 7.68 | 7.79 | 7.72 | 7.65 | 7.83  | 7.91 | 7.93 |
| TC0301118 | CX3CR1                  | 1524 chemokine (C-X3-C motif) receptor 1        | 0.000597 | 2 | 4.65 | 4.58 | 4.81 | 5.35 | 4.77 | 5.11  | 5.25 | 5.27 |
| TC0201025 | CYP20A1                 | 57404 cytochrome P450, family 20, subfamily     | 0.000417 | 2 | 4.13 | 4.34 | 4.21 | 4.38 | 4.44 | 4.54  | 4.64 | 4.49 |
| TC0701407 | CYP51A1 /// Q:          | 1595 cytochrome P450, family 51, subfamily      | 5.25E-07 | 2 | 3.69 | 3.85 | 3.80 | 4.03 | 4.21 | 4.03  | 3.94 | 3.83 |
| TC1400271 | DAAM1                   | 23002 dishevelled associated activator of mor   | 1.68E-07 | 2 | 3.67 | 4.17 | 4.03 | 4.37 | 4.54 | 4.45  | 4.48 | 4.28 |
| TC1400699 | DAD1                    | 1603 defender against cell death 1              | 4.97E-06 | 2 | 8.40 | 8.54 | 8.77 | 8.86 | 8.81 | 8.93  | 8.91 | 8.88 |
| TC0700455 | DBF4                    | 649412 // DBF4 homolog (S. cerevisiae)          | 3.29E-05 | 2 | 2.97 | 3.49 | 3.36 | 3.52 | 3.74 | 3.70  | 3.61 | 3.44 |
| TC0200628 | DBI                     | 1622 diazepam binding inhibitor (GABA rece      | 4.24E-17 | 2 | 6.15 | 6.24 | 6.55 | 6.84 | 6.69 | 6.76  | 6.85 | 6.78 |
| TC1701437 | DCAKD                   | 79877 dephospho-CoA kinase domain contain       | 2.02E-06 | 2 | 4.54 | 4.55 | 4.65 | 4.77 | 4.87 | 4.77  | 4.68 | 4.62 |
| TC0400303 | DCK                     | 1633 deoxycytidine kinase                       | 1.97E-10 | 2 | 4.44 | 4.97 | 5.14 | 5.34 | 5.32 | 5.29  | 5.28 | 5.28 |

|           |                |                                                 |          |   |      |      |      |      |      |      |      |      |
|-----------|----------------|-------------------------------------------------|----------|---|------|------|------|------|------|------|------|------|
| TC1001287 | DCLRE1A        | 9937 DNA cross-link repair 1A (PSO2 homolo      | 4.56E-07 | 2 | 3.04 | 3.20 | 3.12 | 3.30 | 3.52 | 3.42 | 3.44 | 3.36 |
| TC0100858 | DCLRE1B        | 64858 DNA cross-link repair 1B (PSO2 homolo     | 2.72E-09 | 2 | 4.06 | 4.48 | 4.48 | 4.70 | 4.99 | 4.98 | 4.91 | 4.69 |
| TC1200869 | DCP1B          | 196513 DCP1 decapping enzyme homolog B (S.      | 0.000677 | 2 | 3.90 | 3.95 | 3.95 | 4.21 | 4.33 | 4.10 | 4.30 | 4.20 |
| TC0401430 | DCTD           | 1635 dCMP deaminase                             | 1.48E-05 | 2 | 4.19 | 4.35 | 4.32 | 4.46 | 4.54 | 4.43 | 4.51 | 4.47 |
| TC0400217 | DCUN1D4        | 23142 DCN1, defective in cullin neddylation 1,  | 2.65E-05 | 2 | 4.89 | 5.08 | 5.08 | 5.22 | 5.27 | 5.37 | 5.32 | 5.31 |
| TC1101779 | DCUN1D5        | 84259 DCN1, defective in cullin neddylation 1,  | 9.73E-05 | 2 | 4.10 | 4.63 | 4.71 | 4.66 | 4.66 | 4.62 | 4.82 | 4.70 |
| TC1701796 | DCXR           | 51181 dicarbonyl/L-xylulose reductase           | 0.000138 | 2 | 5.99 | 6.10 | 6.01 | 6.12 | 6.17 | 6.16 | 6.10 | 6.10 |
| TC1101461 | DDB1           | 652672 // damage-specific DNA binding protein 1 | 0.000462 | 2 | 4.77 | 4.77 | 4.68 | 4.89 | 5.01 | 5.03 | 5.05 | 4.97 |
| TC2200128 | DDTL           | 1E+08 D-dopachrome tautomerase-like             | 0.000923 | 2 | 5.25 | 5.46 | 5.45 | 5.58 | 5.63 | 5.53 | 5.49 | 5.48 |
| TC0200060 | DDX1           | 1653 DEAD (Asp-Glu-Ala-Asp) box polypeptic      | 3.96E-06 | 2 | 4.08 | 4.58 | 4.74 | 4.96 | 5.05 | 5.06 | 5.14 | 4.95 |
| TC1100825 | DDX10          | 1662 DEAD (Asp-Glu-Ala-Asp) box polypeptic      | 0.000185 | 2 | 3.08 | 3.25 | 3.26 | 3.32 | 3.38 | 3.33 | 3.42 | 3.39 |
| TC1000297 | DDX21          | 9188 DEAD (Asp-Glu-Ala-Asp) box polypeptic      | 2.39E-07 | 2 | 4.53 | 5.20 | 4.67 | 4.88 | 4.90 | 5.17 | 5.42 | 5.28 |
| TC1000296 | DDX50          | 79009 DEAD (Asp-Glu-Ala-Asp) box polypeptic     | 0.000225 | 2 | 4.20 | 4.42 | 4.36 | 4.47 | 4.49 | 4.53 | 4.70 | 4.59 |
| TC1101044 | DEAF1          | 10522 deformed epidermal autoregulatory fa      | 0.00025  | 2 | 5.17 | 5.33 | 5.31 | 5.38 | 5.37 | 5.37 | 5.33 | 5.28 |
| TC0800421 | DECR1          | 1666 2,4-dienoyl CoA reductase 1, mitochon      | 0.000381 | 2 | 7.46 | 7.44 | 7.71 | 7.69 | 7.53 | 7.68 | 7.69 | 7.70 |
| TC0800669 | DEFA4          | 1669 defensin, alpha 4, corticostatin           | 9.78E-22 | 2 | 5.30 | 7.57 | 6.72 | 8.67 | 9.30 | 9.61 | 9.10 | 8.36 |
| TC0600982 | DEK            | 7913 DEK oncogene (DNA binding)                 | 0.000159 | 2 | 8.16 | 8.62 | 8.70 | 8.64 | 8.61 | 8.68 | 8.74 | 8.69 |
| TC0102566 | DENND2C        | 163259 DENN/MADD domain containing 2C ///       | 2.69E-05 | 2 | 3.34 | 3.58 | 3.55 | 3.70 | 3.90 | 3.86 | 3.68 | 3.56 |
| TC1200781 | DENR           | 8562 density-regulated protein                  | 1.62E-08 | 2 | 6.88 | 7.29 | 7.46 | 7.44 | 7.53 | 7.58 | 7.64 | 7.50 |
| TC0102349 | DEPDC1         | 55635 DEP domain containing 1 /// DEP doma      | 0.00022  | 2 | 2.06 | 2.13 | 2.13 | 2.23 | 2.41 | 2.35 | 2.28 | 2.26 |
| TC0501006 | DEPDC1B        | 55789 DEP domain containing 1B                  | 5.74E-10 | 2 | 3.78 | 4.09 | 4.15 | 4.48 | 4.64 | 4.64 | 4.43 | 4.30 |
| TC0501110 | DHFR           | 1719 dihydrofolate reductase                    | 4.24E-11 | 2 | 4.42 | 5.22 | 5.35 | 5.75 | 6.00 | 5.77 | 5.66 | 5.26 |
| TC1400112 | DHRS4L2 /// DI | 731356 // dehydrogenase/reductase (SDR family)  | 0.000642 | 2 | 5.10 | 5.16 | 5.09 | 5.19 | 5.21 | 5.22 | 5.31 | 5.22 |
| TC1300521 | DIAPH3         | 81624 diaphanous homolog 3 (Drosophila) ///     | 0.000265 | 2 | 2.62 | 2.69 | 2.72 | 2.81 | 3.02 | 2.97 | 2.86 | 2.79 |
| TC0501016 | DIMT1L         | 27292 DIM1 dimethyladenosine transferase 1      | 0.000699 | 2 | 3.12 | 3.28 | 3.25 | 3.28 | 3.39 | 3.37 | 3.41 | 3.40 |
| TC1500418 | DIS3L          | 115752 DIS3 mitotic control homolog (S. cerevi  | 2.73E-09 | 2 | 3.45 | 3.56 | 3.49 | 3.67 | 4.05 | 4.04 | 4.04 | 3.78 |
| TC0X00710 | DKC1           | 1736 dyskeratosis congenita 1, dyskerin         | 1.40E-07 | 2 | 5.34 | 5.33 | 5.22 | 5.43 | 5.63 | 5.62 | 5.81 | 5.59 |
| TC1100846 | DLAT           | 1737 dihydrolipoamide S-acetyltransferase       | 0.000512 | 2 | 3.76 | 3.85 | 3.84 | 3.93 | 4.06 | 4.04 | 4.12 | 4.04 |
| TC1400874 | DLGAP5 /// DL  | 9787 discs, large (Drosophila) homolog-assoc    | 1.22E-06 | 2 | 2.85 | 3.02 | 2.99 | 3.24 | 3.65 | 3.54 | 3.50 | 3.24 |
| TC2200665 | DMC1           | 11144 DMC1 dosage suppressor of mck1 hom        | 3.80E-06 | 2 | 2.47 | 2.60 | 2.73 | 2.92 | 3.01 | 2.82 | 2.70 | 2.71 |
| TC1000817 | DNAJC1         | 64215 Dnaj (Hsp40) homolog, subfamily C, me     | 7.80E-06 | 2 | 5.12 | 6.06 | 5.70 | 6.07 | 5.90 | 5.97 | 6.07 | 6.09 |
| TC0200913 | DNAJC10        | 54431 Dnaj (Hsp40) homolog, subfamily C, me     | 2.18E-08 | 2 | 4.18 | 4.24 | 4.12 | 4.62 | 4.52 | 4.65 | 4.80 | 4.75 |
| TC1300111 | DNAJC15        | 29103 Dnaj (Hsp40) homolog, subfamily C, me     | 5.37E-05 | 2 | 4.21 | 4.57 | 4.51 | 4.73 | 4.81 | 4.90 | 5.03 | 5.03 |
| TC1500847 | DNAJC17        | 55192 Dnaj (Hsp40) homolog, subfamily C, me     | 6.65E-05 | 2 | 5.59 | 5.93 | 5.93 | 6.09 | 6.10 | 6.06 | 6.26 | 6.03 |

|           |                |           |                                          |          |   |      |       |       |       |       |       |       |       |
|-----------|----------------|-----------|------------------------------------------|----------|---|------|-------|-------|-------|-------|-------|-------|-------|
| TC0500117 | DNAJC21 /// DI | 134218    | Dnaj (Hsp40) homolog, subfamily C, me    | 2.69E-05 | 2 | 4.99 | 5.62  | 5.58  | 5.79  | 5.89  | 5.95  | 6.10  | 5.79  |
| TC1300235 | DNAJC3         | 5611      | Dnaj (Hsp40) homolog, subfamily C, me    | 7.71E-07 | 2 | 7.22 | 7.54  | 7.68  | 7.83  | 7.76  | 7.77  | 7.77  | 7.69  |
| TC1200241 | DNM1L          | 10059     | dynamain 1-like /// Dynamain-1-like prot | 7.11E-08 | 2 | 4.11 | 4.39  | 4.37  | 4.59  | 4.83  | 4.76  | 4.74  | 4.56  |
| TC1901156 | DNMT1          | 1786      | DNA (cytosine-5-)-methyltransferase 1    | 1.55E-08 | 2 | 5.01 | 5.22  | 5.12  | 5.38  | 5.49  | 5.51  | 5.55  | 5.40  |
| TC2100109 | DOPEY2         | 9980      | dopey family member 2                    | 0.000552 | 2 | 4.77 | 4.63  | 4.68  | 4.87  | 5.01  | 4.91  | 4.95  | 4.79  |
| TC1101891 | DPAGT1         | 1798      | dolichyl-phosphate (UDP-N-acetylgluco    | 0.000253 | 2 | 4.30 | 4.35  | 4.37  | 4.50  | 4.62  | 4.56  | 4.50  | 4.36  |
| TC0301044 | DPH3           | 285381    | DPH3, KTI11 homolog (S. cerevisiae)      | 5.26E-07 | 2 | 6.93 | 7.31  | 7.49  | 7.55  | 7.42  | 7.55  | 7.44  | 7.54  |
| TC0102822 | DPM3           | 54344     | dolichyl-phosphate mannosyltransfera     | 0.000126 | 2 | 4.62 | 4.67  | 4.70  | 4.89  | 4.96  | 4.85  | 4.91  | 4.84  |
| TC0701122 | DPY19L1        | 23333     | dpy-19-like 1 (C. elegans)               | 1.31E-08 | 2 | 3.95 | 4.29  | 4.35  | 4.46  | 4.56  | 4.53  | 4.57  | 4.52  |
| TC0800436 | DPY19L4        | 286148    | dpy-19-like 4 (C. elegans)               | 0.000628 | 2 | 2.76 | 2.79  | 2.76  | 2.79  | 3.04  | 2.98  | 3.03  | 2.92  |
| TC0800165 | DPYSL2         | 1808      | dihydropyrimidinase-like 2               | 4.35E-08 | 2 | 4.43 | 5.01  | 4.92  | 5.45  | 5.48  | 5.48  | 5.32  | 5.11  |
| TC1100558 | DRAP1          | 10589     | DR1-associated protein 1 (negative cof   | 1.66E-05 | 2 | 5.75 | 6.05  | 6.12  | 6.23  | 6.12  | 6.13  | 6.19  | 6.27  |
| TC1800397 | DSC2           | 1824      | desmocollin 2                            | 1.26E-08 | 2 | 7.10 | 6.81  | 7.59  | 7.99  | 7.32  | 7.72  | 8.16  | 8.06  |
| TC0801215 | DSCC1          | 79075     | defective in sister chromatid cohesion   | 0.000401 | 2 | 2.32 | 2.39  | 2.32  | 2.48  | 2.66  | 2.60  | 2.55  | 2.48  |
| TC2100335 | DSCR3          | 10311     | Down syndrome critical region gene 3 /   | 0.000662 | 2 | 6.45 | 6.68  | 6.85  | 6.97  | 6.83  | 6.87  | 6.88  | 6.79  |
| TC2000096 | DSTN           | 11034     | destrin (actin depolymerizing factor)    | 5.83E-11 | 2 | 4.51 | 5.06  | 5.35  | 5.34  | 5.34  | 5.37  | 5.43  | 5.37  |
| TC2000111 | DTD1           | 92675     | D-tyrosyl-tRNA deacylase 1 homolog (S    | 1.88E-09 | 2 | 6.31 | 6.64  | 6.58  | 7.09  | 7.10  | 7.29  | 7.22  | 7.03  |
| TC0101498 | DTL            | 51514     | denticleless homolog (Drosophila) /// C  | 3.22E-09 | 2 | 3.14 | 3.34  | 3.19  | 3.75  | 4.24  | 4.20  | 3.94  | 3.58  |
| TC0501233 | DTWD2          | 285605    | DTW domain containing 2                  | 4.37E-05 | 2 | 2.92 | 3.04  | 3.16  | 3.12  | 3.32  | 3.35  | 3.14  | 3.14  |
| TC0103248 | DUSP10         | 11221     | dual specificity phosphatase 10          | 0.000577 | 2 | 3.96 | 4.26  | 4.18  | 4.36  | 4.29  | 4.26  | 4.30  | 4.30  |
| TC0101181 | DUSP23         | 54935     | dual specificity phosphatase 23          | 5.67E-05 | 2 | 5.67 | 5.76  | 5.78  | 5.87  | 5.91  | 6.00  | 5.92  | 5.90  |
| TC1500319 | DUT            | 1854      | deoxyuridine triphosphatase              | 4.83E-09 | 2 | 4.72 | 4.90  | 4.87  | 5.21  | 5.53  | 5.57  | 5.41  | 5.15  |
| TC1200753 | DYNLL1         | 8655      | dynein, light chain, LC8-type 1          | 3.75E-10 | 2 | 5.22 | 5.70  | 5.71  | 5.75  | 5.81  | 5.76  | 5.80  | 5.71  |
| TC2000210 | DYNLRB1        | 83658     | dynein, light chain, roadblock-type 1 // | 3.87E-11 | 2 | 6.22 | 6.82  | 6.81  | 6.91  | 6.95  | 6.90  | 6.83  | 6.82  |
| TC1101252 | E2F8           | 79733     | E2F transcription factor 8               | 1.69E-07 | 2 | 3.25 | 3.54  | 3.48  | 3.77  | 4.23  | 4.07  | 3.95  | 3.63  |
| TC0800502 | EBAG9          | 9166      | estrogen receptor binding site associat  | 6.84E-10 | 2 | 3.99 | 4.15  | 4.13  | 4.27  | 4.38  | 4.39  | 4.54  | 4.54  |
| TC0X00206 | EBP            | 10682     | emopamil binding protein (sterol isom    | 2.07E-12 | 2 | 5.47 | 5.44  | 5.40  | 5.91  | 6.20  | 6.19  | 6.10  | 5.91  |
| TC1901476 | ECH1           | 1891      | enoyl Coenzyme A hydratase 1, peroxis    | 1.66E-06 | 2 | 5.25 | 5.29  | 5.37  | 5.59  | 5.60  | 5.52  | 5.64  | 5.45  |
| TC0601394 | EEF1A1         | 1915      | eukaryotic translation elongation facto  | 2.28E-07 | 2 | 9.69 | 10.25 | 10.16 | 10.36 | 10.44 | 10.42 | 10.36 | 10.22 |
| TC0900664 | EEF1AL3        | ---       | Eukaryotic translation elongation facto  | 3.09E-09 | 2 | 9.03 | 9.80  | 9.76  | 10.01 | 10.11 | 10.08 | 9.99  | 9.82  |
| TC0201039 | EEF1B2         | 649440 // | eukaryotic translation elongation facto  | 1.86E-07 | 2 | 4.89 | 5.04  | 4.92  | 5.19  | 5.30  | 5.31  | 5.34  | 5.20  |
| TC0600939 | EEF1E1         | 9521      | eukaryotic translation elongation facto  | 1.43E-06 | 2 | 2.60 | 2.79  | 2.76  | 2.99  | 3.34  | 3.11  | 3.21  | 2.85  |
| TC1901046 | EEF2           | 1938      | eukaryotic translation elongation facto  | 4.77E-05 | 2 | 6.54 | 6.83  | 6.53  | 7.11  | 7.23  | 7.03  | 7.00  | 6.85  |
| TC0101681 | EFCAB2         | 84288     | EF-hand calcium binding domain 2 /// t   | 2.66E-07 | 2 | 4.40 | 4.76  | 5.14  | 5.10  | 4.84  | 5.08  | 5.21  | 5.14  |

|           |                         |        |                                                  |          |   |      |      |      |      |      |      |      |      |
|-----------|-------------------------|--------|--------------------------------------------------|----------|---|------|------|------|------|------|------|------|------|
| TC0800564 | EFR3A /// EFR3          | 23167  | EFR3 homolog A ( <i>S. cerevisiae</i> ) /// Prot | 1.19E-07 | 2 | 5.69 | 6.06 | 5.99 | 6.22 | 6.04 | 6.31 | 6.34 | 6.29 |
| TC1501168 | EFTUD1                  | 79631  | elongation factor Tu GTP binding doma            | 1.24E-07 | 2 | 4.24 | 4.21 | 4.23 | 4.36 | 4.47 | 4.46 | 4.54 | 4.44 |
| TC0800796 | EGR3                    | 1960   | early growth response 3                          | 0.000725 | 2 | 3.28 | 4.24 | 3.47 | 3.47 | 3.61 | 4.14 | 3.88 | 4.20 |
| TC0200280 | EHBP1                   | 23301  | EH domain binding protein 1 /// EH doi           | 2.85E-06 | 2 | 3.79 | 3.86 | 3.89 | 4.00 | 4.04 | 4.00 | 4.06 | 3.97 |
| TC1100975 | EI24                    | 9538   | etoposide induced 2.4 mRNA                       | 8.80E-09 | 2 | 4.20 | 4.25 | 4.15 | 4.37 | 4.54 | 4.61 | 4.55 | 4.46 |
| TC1500320 | EID1                    | 23741  | EP300 interacting inhibitor of differenti        | 3.07E-07 | 2 | 6.94 | 7.66 | 7.79 | 8.04 | 7.96 | 7.88 | 8.04 | 7.80 |
| TC0X00808 | EIF1AX /// EIF1         | 1964   | eukaryotic translation initiation factor         | 4.19E-05 | 2 | 5.63 | 6.51 | 6.37 | 6.47 | 6.74 | 6.95 | 6.78 | 6.56 |
| TC0300708 | EIF2A                   | 83939  | eukaryotic translation initiation factor         | 7.56E-05 | 2 | 3.77 | 4.27 | 4.08 | 4.26 | 4.33 | 4.30 | 4.47 | 4.27 |
| TC0700993 | EIF2AK1                 | 27102  | eukaryotic translation initiation factor         | 0.000119 | 2 | 6.07 | 6.16 | 6.18 | 6.62 | 6.69 | 6.58 | 6.50 | 6.26 |
| TC1500221 | EIF2AK4                 | 440275 | eukaryotic translation initiation factor         | 9.11E-11 | 2 | 3.84 | 3.92 | 3.82 | 4.10 | 4.25 | 4.30 | 4.41 | 4.19 |
| TC1400313 | EIF2S1                  | 1965   | eukaryotic translation initiation factor         | 6.13E-07 | 2 | 4.86 | 5.35 | 5.34 | 5.76 | 5.91 | 5.83 | 5.93 | 5.64 |
| TC0700020 | EIF3B                   | 8662   | eukaryotic translation initiation factor         | 1.73E-05 | 2 | 4.57 | 4.56 | 4.56 | 4.65 | 4.78 | 4.74 | 4.78 | 4.70 |
| TC1600296 | EIF3C                   | 8663   | eukaryotic translation initiation factor         | 8.03E-08 | 2 | 5.73 | 5.98 | 5.68 | 6.16 | 6.33 | 6.34 | 6.44 | 6.20 |
| TC1600965 | EIF3CL /// EIF3         | 728689 | eukaryotic translation initiation factor         | 2.51E-07 | 2 | 5.58 | 5.78 | 5.53 | 5.94 | 6.07 | 6.09 | 6.16 | 5.97 |
| TC0801193 | EIF3E                   | 3646   | eukaryotic translation initiation factor         | 3.46E-12 | 2 | 4.58 | 6.36 | 6.03 | 6.48 | 6.70 | 6.76 | 6.58 | 6.13 |
| TC2200265 | EIF3EIP                 | 51386  | eukaryotic translation initiation factor         | 2.79E-06 | 2 | 6.98 | 7.02 | 6.80 | 7.40 | 7.52 | 7.57 | 7.50 | 7.28 |
| TC0801206 | EIF3H                   | 8667   | eukaryotic translation initiation factor         | 4.21E-07 | 2 | 6.51 | 7.10 | 6.87 | 7.05 | 7.05 | 7.18 | 7.31 | 7.15 |
| TC1500293 | EIF3J                   | 8669   | eukaryotic translation initiation factor         | 8.44E-09 | 2 | 5.97 | 6.06 | 6.04 | 6.25 | 6.30 | 6.39 | 6.51 | 6.38 |
| TC1900507 | EIF3K                   | 27335  | eukaryotic translation initiation factor         | 0.000153 | 2 | 7.78 | 8.17 | 8.01 | 8.17 | 8.26 | 8.23 | 8.29 | 8.17 |
| TC1100257 | EIF3M                   | 10480  | eukaryotic translation initiation factor         | 2.94E-15 | 2 | 5.38 | 5.84 | 6.18 | 6.72 | 6.55 | 6.41 | 6.54 | 6.24 |
| TC1700101 | EIF4A1 /// SNO 1973 /// | 9      | eukaryotic translation initiation factor         | 0.000551 | 2 | 5.63 | 5.76 | 5.63 | 5.93 | 5.95 | 5.91 | 5.86 | 5.85 |
| TC1200360 | EIF4B                   | 1975   | eukaryotic translation initiation factor         | 5.76E-06 | 2 | 7.54 | 8.11 | 7.87 | 8.06 | 8.13 | 8.06 | 8.11 | 7.95 |
| TC0401136 | EIF4E                   | 1977   | eukaryotic translation initiation factor         | 0.00042  | 2 | 6.20 | 6.14 | 6.24 | 6.35 | 6.35 | 6.31 | 6.31 | 6.29 |
| TC0201185 | EIF4E2                  | 9470   | eukaryotic translation initiation factor         | 0.000512 | 2 | 6.76 | 6.73 | 6.89 | 7.01 | 6.91 | 6.95 | 6.96 | 6.95 |
| TC1000315 | EIF4EBP2                | 1979   | eukaryotic translation initiation factor         | 0.000199 | 2 | 7.56 | 7.93 | 7.68 | 7.91 | 7.90 | 8.02 | 7.94 | 8.01 |
| TC1900021 | ELA2                    | 1991   | elastase 2, neutrophil                           | 6.63E-11 | 2 | 3.91 | 4.82 | 4.48 | 5.41 | 6.01 | 5.91 | 5.47 | 4.96 |
| TC1901121 | ELAVL1                  | 1994   | ELAV (embryonic lethal, abnormal visio           | 2.32E-06 | 2 | 5.94 | 6.13 | 6.06 | 6.30 | 6.33 | 6.28 | 6.26 | 6.29 |
| TC1300426 | ELF1                    | 1997   | E74-like factor 1 (ets domain transcript         | 3.34E-07 | 2 | 7.61 | 7.79 | 7.79 | 7.88 | 7.72 | 7.99 | 8.03 | 8.03 |
| TC0X00889 | ELK1                    | 2002   | ELK1, member of ETS oncogene family,             | 0.000356 | 2 | 4.46 | 4.64 | 4.61 | 4.63 | 4.70 | 4.70 | 4.64 | 4.68 |
| TC0501157 | ELL2                    | 22936  | elongation factor, RNA polymerase II, 2          | 0.000387 | 2 | 4.83 | 5.35 | 5.24 | 5.47 | 5.42 | 5.48 | 5.51 | 5.37 |
| TC0102185 | ELOVL1                  | 64834  | elongation of very long chain fatty acid         | 3.78E-05 | 2 | 5.59 | 5.48 | 5.63 | 5.68 | 5.70 | 5.63 | 5.61 | 5.57 |
| TC0501007 | ELOVL7                  | 79993  | ELOVL family member 7, elongation of             | 0.000413 | 2 | 3.66 | 4.09 | 3.99 | 4.37 | 4.64 | 4.68 | 4.36 | 4.34 |
| TC1100251 | ELP4                    | 26610  | elongation protein 4 homolog ( <i>S. cerev</i>   | 0.000163 | 2 | 3.52 | 3.45 | 3.57 | 3.59 | 3.67 | 3.67 | 3.81 | 3.60 |
| TC0400358 | ENOPH1                  | 58478  | enolase-phosphatase 1 /// Enolase-phc            | 2.84E-10 | 2 | 3.88 | 4.12 | 3.98 | 4.44 | 4.77 | 4.67 | 4.75 | 4.51 |

|           |               |        |                                               |          |   |      |      |      |      |      |      |      |      |
|-----------|---------------|--------|-----------------------------------------------|----------|---|------|------|------|------|------|------|------|------|
| TC0X01236 | ENOX2         | 10495  | ecto-NOX disulfide-thiol exchanger 2          | 0.000468 | 2 | 3.85 | 4.00 | 3.97 | 4.16 | 4.20 | 4.15 | 4.38 | 4.20 |
| TC0200636 | EPB41L5       | 57669  | erythrocyte membrane protein band 4.          | 7.97E-07 | 2 | 3.68 | 3.95 | 3.72 | 3.87 | 3.81 | 4.10 | 4.04 | 4.10 |
| TC0101561 | EPHX1         | 2052   | epoxide hydrolase 1, microsomal (xeno         | 4.67E-07 | 2 | 3.86 | 4.04 | 3.92 | 4.05 | 4.18 | 4.12 | 4.06 | 3.92 |
| TC0103239 | EPRS          | 2058   | glutamyl-prolyl-tRNA synthetase               | 1.70E-06 | 2 | 3.77 | 4.09 | 4.02 | 4.34 | 4.64 | 4.55 | 4.69 | 4.41 |
| TC2100341 | ERG           | 2078   | v-ets erythroblastosis virus E26 oncoge       | 1.20E-11 | 2 | 4.00 | 5.37 | 4.47 | 5.12 | 5.85 | 5.88 | 5.52 | 4.96 |
| TC2000223 | ERGIC3        | 51614  | ERGIC and golgi 3 /// Endoplasmic retic       | 3.81E-08 | 2 | 5.04 | 5.53 | 5.49 | 5.75 | 5.79 | 5.67 | 5.76 | 5.50 |
| TC0900769 | ERMP1         | 79956  | endoplasmic reticulum metallopeptida:         | 0.00014  | 2 | 3.97 | 3.96 | 4.01 | 4.05 | 4.10 | 4.16 | 4.21 | 4.18 |
| TC1200704 | ERP29         | 10961  | endoplasmic reticulum protein 29              | 4.67E-10 | 2 | 4.36 | 4.37 | 4.39 | 4.75 | 4.78 | 4.87 | 4.91 | 4.79 |
| TC0800172 | ESCO2         | 157570 | establishment of cohesion 1 homolog 2         | 0.000129 | 2 | 2.68 | 2.76 | 2.75 | 2.95 | 3.19 | 3.10 | 3.10 | 3.02 |
| TC2000562 | ESF1          | 51575  | ESF1, nucleolar pre-rRNA processing pr        | 4.50E-09 | 2 | 3.55 | 3.85 | 3.74 | 4.11 | 4.33 | 4.31 | 4.61 | 4.25 |
| TC1501123 | ETFA          | 2108   | electron-transfer-flavoprotein, alpha p       | 0.000262 | 2 | 5.09 | 5.58 | 5.63 | 5.91 | 5.91 | 5.86 | 5.81 | 5.76 |
| TC1901738 | ETFB          | 2109   | electron-transfer-flavoprotein, beta po       | 4.19E-11 | 2 | 5.89 | 6.20 | 6.21 | 6.55 | 6.50 | 6.48 | 6.48 | 6.38 |
| TC1901561 | ETHE1         | 23474  | ethylmalonic encephalopathy 1                 | 5.44E-08 | 2 | 4.32 | 4.86 | 4.89 | 5.06 | 5.39 | 5.20 | 4.95 | 4.69 |
| TC1101958 | ETS1          | 2113   | v-ets erythroblastosis virus E26 oncoge       | 1.66E-05 | 2 | 5.68 | 6.38 | 6.15 | 6.29 | 6.41 | 6.43 | 6.42 | 6.20 |
| TC1600924 | EXOD1         | 112479 | exonuclease domain containing 1 /// e         | 3.87E-07 | 2 | 2.99 | 3.04 | 3.00 | 3.17 | 3.39 | 3.42 | 3.47 | 3.35 |
| TC0701733 | EZH2          | 2146   | enhancer of zeste homolog 2 (Drosoph          | 8.74E-06 | 2 | 3.62 | 3.77 | 3.68 | 3.87 | 4.13 | 4.11 | 4.17 | 3.91 |
| TC0600930 | F13A1         | 2162   | coagulation factor XIII, A1 polypeptide       | 4.58E-07 | 2 | 4.43 | 4.96 | 4.73 | 6.07 | 6.36 | 6.50 | 5.92 | 5.90 |
| TC1101467 | FADS3 /// FAD | 3995   | /// fatty acid desaturase 3 /// fatty acid de | 9.72E-05 | 2 | 4.30 | 4.37 | 4.29 | 4.38 | 4.52 | 4.51 | 4.47 | 4.40 |
| TC0102244 | FAF1          | 11124  | Fas (TNFRSF6) associated factor 1 /// F       | 6.42E-06 | 2 | 3.84 | 3.98 | 4.11 | 4.24 | 4.34 | 4.28 | 4.28 | 4.17 |
| TC1500541 | FAH           | 2184   | fumarylacetoacetate hydrolase (fumar          | 3.67E-05 | 2 | 4.72 | 4.84 | 4.81 | 4.94 | 5.00 | 4.97 | 4.88 | 4.82 |
| TC1500570 | FAM103A1      | 83640  | family with sequence similarity 103, m        | 3.55E-07 | 2 | 6.91 | 7.21 | 7.33 | 7.31 | 7.20 | 7.49 | 7.55 | 7.60 |
| TC0901036 | FAM108B1      | 51104  | family with sequence similarity 108, m        | 2.17E-09 | 2 | 4.30 | 4.55 | 4.61 | 4.80 | 4.72 | 4.66 | 4.72 | 4.67 |
| TC2000012 | FAM110A       | 83541  | family with sequence similarity 110, m        | 0.000214 | 2 | 5.26 | 5.39 | 5.42 | 5.51 | 5.48 | 5.50 | 5.51 | 5.52 |
| TC0701056 | FAM126A       | 84668  | family with sequence similarity 126, m        | 4.70E-09 | 2 | 4.96 | 5.13 | 5.37 | 5.53 | 5.41 | 5.51 | 5.57 | 5.63 |
| TC0201936 | FAM128A       | 729985 | // family with sequence similarity 128, m     | 1.97E-06 | 2 | 5.79 | 5.95 | 5.85 | 6.04 | 6.11 | 6.10 | 6.07 | 6.04 |
| TC0200677 | FAM128B       | 80097  | family with sequence similarity 128, m        | 5.77E-11 | 2 | 5.25 | 5.61 | 5.57 | 5.68 | 5.77 | 5.74 | 5.76 | 5.67 |
| TC1400463 | FAM14B        | 122509 | family with sequence similarity 14, mer       | 4.71E-05 | 2 | 4.64 | 4.74 | 4.65 | 4.80 | 4.90 | 4.94 | 4.85 | 4.78 |
| TC0101677 | FAM152A /// C | 731151 | // family with sequence similarity 152, m     | 2.34E-08 | 2 | 4.94 | 5.01 | 5.27 | 5.35 | 5.28 | 5.35 | 5.38 | 5.36 |
| TC2200708 | FAM152B       | 27351  | family with sequence similarity 152, m        | 1.91E-06 | 2 | 5.49 | 6.01 | 6.03 | 6.23 | 6.16 | 6.11 | 6.03 | 6.09 |
| TC0300551 | FAM162A       | 26355  | family with sequence similarity 162, m        | 1.24E-13 | 2 | 3.78 | 4.04 | 3.93 | 4.35 | 4.62 | 4.70 | 4.68 | 4.59 |
| TC2100096 | FAM165B       | 54065  | family with sequence similarity 165, m        | 2.51E-05 | 2 | 4.34 | 4.39 | 4.44 | 4.60 | 4.70 | 4.67 | 4.78 | 4.64 |
| TC0101314 | FAM20B        | 9917   | family with sequence similarity 20, mer       | 0.000397 | 2 | 4.61 | 4.88 | 4.63 | 4.88 | 4.97 | 4.98 | 5.04 | 4.96 |
| TC0900232 | FAM27A        | 548321 | family with sequence similarity 27, mer       | 6.91E-05 | 2 | 5.35 | 5.43 | 5.41 | 5.63 | 5.56 | 5.70 | 5.49 | 5.40 |
| TC1900282 | FAM32A        | 26017  | family with sequence similarity 32, mer       | 1.04E-06 | 2 | 6.80 | 6.94 | 7.00 | 7.17 | 7.12 | 7.15 | 7.22 | 7.28 |

|           |               |           |                                           |          |   |      |      |      |      |      |      |      |      |
|-----------|---------------|-----------|-------------------------------------------|----------|---|------|------|------|------|------|------|------|------|
| TC1701565 | FAM33A /// NM | 348235    | family with sequence similarity 33, mer   | 8.83E-14 | 2 | 4.19 | 4.73 | 4.98 | 5.40 | 5.67 | 5.64 | 5.62 | 5.28 |
| TC0701589 | FAM3C         | 10447     | family with sequence similarity 3, mem    | 1.84E-06 | 2 | 4.04 | 4.31 | 4.27 | 4.32 | 4.34 | 4.33 | 4.42 | 4.29 |
| TC0601420 | FAM46A        | 55603     | family with sequence similarity 46, mer   | 2.92E-12 | 2 | 5.27 | 5.21 | 5.37 | 5.62 | 5.69 | 5.79 | 5.80 | 5.66 |
| TC0X00704 | FAM50A        | 9130      | family with sequence similarity 50, mer   | 5.41E-06 | 2 | 6.35 | 6.57 | 6.28 | 6.57 | 6.74 | 6.73 | 6.75 | 6.63 |
| TC0X01367 | FAM58A        | 651831 // | family with sequence similarity 58, mer   | 0.000438 | 2 | 4.89 | 5.00 | 5.22 | 5.14 | 5.17 | 5.10 | 5.14 | 5.14 |
| TC1201080 | FAM60A        | 58516     | family with sequence similarity 60, mer   | 4.07E-13 | 2 | 4.38 | 4.94 | 4.98 | 5.28 | 5.31 | 5.29 | 5.28 | 5.09 |
| TC0701806 | FAM62B        | 57488     | family with sequence similarity 62 (C2 c  | 3.69E-09 | 2 | 5.84 | 5.84 | 5.90 | 6.17 | 6.27 | 6.32 | 6.45 | 6.29 |
| TC0101458 | FAM72A        | 729533    | family with sequence similarity 72, mer   | 3.25E-05 | 2 | 3.79 | 3.93 | 3.88 | 3.93 | 4.13 | 4.05 | 4.08 | 3.98 |
| TC0100897 | FAM72B        | 653820    | family with sequence similarity 72, mer   | 6.96E-05 | 2 | 3.81 | 3.80 | 3.81 | 3.88 | 4.12 | 4.10 | 4.08 | 3.98 |
| TC1501025 | FAM96A        | 84191     | family with sequence similarity 96, mer   | 1.43E-07 | 2 | 6.43 | 6.89 | 7.11 | 7.27 | 7.16 | 7.19 | 7.28 | 7.20 |
| TC1601167 | FAM96B        | 51647     | family with sequence similarity 96, mer   | 0.000487 | 2 | 5.70 | 5.73 | 5.68 | 6.03 | 6.05 | 5.93 | 5.97 | 5.88 |
| TC0201423 | FAM98A        | 25940     | family with sequence similarity 98, mer   | 2.30E-05 | 2 | 3.83 | 3.82 | 3.96 | 4.11 | 4.15 | 4.09 | 4.25 | 4.09 |
| TC1500215 | FAM98B        | 283742    | family with sequence similarity 98, mer   | 8.34E-05 | 2 | 3.35 | 3.31 | 3.31 | 3.37 | 3.54 | 3.55 | 3.58 | 3.55 |
| TC1500607 | FANCI         | 55215     | Fanconi anemia, complementation gro       | 5.63E-07 | 2 | 3.33 | 3.42 | 3.33 | 3.61 | 4.03 | 3.97 | 3.91 | 3.65 |
| TC0201537 | FANCL         | 55120     | Fanconi anemia, complementation gro       | 0.000244 | 2 | 3.25 | 3.38 | 3.50 | 3.56 | 3.52 | 3.57 | 3.69 | 3.62 |
| TC1200223 | FAR2          | 55711     | fatty acyl CoA reductase 2                | 9.10E-05 | 2 | 7.16 | 7.41 | 7.68 | 7.83 | 7.92 | 7.75 | 7.63 | 7.39 |
| TC1901218 | FARSA         | 2193      | phenylalanyl-tRNA synthetase, alpha su    | 2.54E-06 | 2 | 5.10 | 5.26 | 5.19 | 5.38 | 5.45 | 5.45 | 5.45 | 5.35 |
| TC0202348 | FARSB         | 10056     | phenylalanyl-tRNA synthetase, beta sul    | 5.45E-06 | 2 | 3.44 | 3.61 | 3.57 | 3.66 | 3.82 | 3.79 | 3.75 | 3.64 |
| TC1901497 | FBL           | 2091      | fibrillarin                               | 5.72E-09 | 2 | 5.58 | 6.12 | 5.72 | 6.46 | 6.74 | 6.76 | 6.73 | 6.30 |
| TC0601473 | FBXL4         | 26235     | F-box and leucine-rich repeat protein 4   | 1.15E-05 | 2 | 4.69 | 4.62 | 4.86 | 4.96 | 4.91 | 4.84 | 4.89 | 4.83 |
| TC0800003 | FBXO25        | 26260     | F-box protein 25                          | 0.000248 | 2 | 3.79 | 3.89 | 3.97 | 4.00 | 3.99 | 3.99 | 4.18 | 4.11 |
| TC0300937 | FBXO45        | 200933    | F-box protein 45                          | 5.24E-06 | 2 | 4.49 | 4.84 | 4.81 | 4.89 | 5.04 | 5.09 | 5.07 | 4.89 |
| TC0601696 | FBXO5         | 26271     | F-box protein 5 /// F-box only protein 5  | 3.81E-08 | 2 | 3.45 | 3.70 | 3.59 | 4.02 | 4.41 | 4.28 | 4.20 | 3.91 |
| TC1100464 | FEN1          | 2237      | flap structure-specific endonuclease 1    | 1.83E-09 | 2 | 4.11 | 4.18 | 4.06 | 4.35 | 4.63 | 4.68 | 4.58 | 4.27 |
| TC0800887 | FGFR1         | 2260      | fibroblast growth factor receptor 1 (fm   | 0.000503 | 2 | 4.04 | 3.96 | 3.98 | 3.98 | 4.12 | 4.07 | 4.02 | 3.98 |
| TC0103403 | FH            | 2271      | fumarate hydratase                        | 1.68E-06 | 2 | 3.67 | 3.87 | 3.91 | 4.15 | 4.25 | 4.18 | 4.33 | 4.05 |
| TC0701200 | FIGNL1        | 63979     | fidgetin-like 1                           | 6.46E-05 | 2 | 3.00 | 3.10 | 3.04 | 3.13 | 3.26 | 3.28 | 3.22 | 3.19 |
| TC1400817 | FKBP3         | 2287      | FK506 binding protein 3, 25kDa            | 3.36E-10 | 2 | 6.70 | 7.59 | 7.70 | 7.74 | 7.71 | 7.81 | 7.83 | 7.69 |
| TC1200018 | FKBP4         | 2288      | FK506 binding protein 4, 59kDa            | 6.73E-05 | 2 | 4.39 | 4.51 | 4.37 | 4.84 | 4.87 | 4.70 | 4.81 | 4.72 |
| TC1501061 | FLJ11506      | 79719     | hypothetical protein FLJ11506             | 0.000113 | 2 | 4.69 | 4.97 | 5.03 | 5.10 | 5.01 | 5.05 | 5.10 | 5.03 |
| TC1201610 | FLJ20674      | 54621     | hypothetical protein FLJ20674             | 1.52E-08 | 2 | 4.49 | 4.32 | 4.27 | 4.86 | 4.79 | 4.93 | 4.99 | 4.79 |
| TC0300334 | FLNB          | 2317      | filamin B, beta (actin binding protein 2) | 0.000415 | 2 | 4.13 | 4.10 | 4.26 | 4.58 | 4.33 | 4.31 | 4.53 | 4.48 |
| TC1300367 | FLT3          | 2322      | fms-related tyrosine kinase 3 /// FL cyt  | 1.51E-07 | 2 | 3.17 | 3.18 | 3.20 | 3.43 | 3.30 | 3.37 | 3.73 | 3.49 |
| TC0800262 | FNTA          | 2339      | farnesyltransferase, CAAX box, alpha      | 3.19E-05 | 2 | 5.72 | 5.83 | 6.00 | 6.06 | 5.98 | 6.06 | 6.14 | 6.09 |

|            |                |                                                   |          |   |      |      |      |      |      |      |      |      |
|------------|----------------|---------------------------------------------------|----------|---|------|------|------|------|------|------|------|------|
| TC1700864  | FOXK2 /// Q6Z1 | 3607 forkhead box K2 /// Forkhead box prot        | 2.12E-05 | 2 | 5.10 | 5.22 | 5.30 | 5.45 | 5.52 | 5.36 | 5.39 | 5.24 |
| TC1200874  | FOXK1          | 2305 forkhead box M1                              | 0.000309 | 2 | 4.05 | 4.11 | 4.01 | 4.14 | 4.41 | 4.29 | 4.30 | 4.16 |
| TC0901075  | FRMD3          | 257019 FERM domain containing 3 /// FERM do       | 1.75E-08 | 2 | 3.59 | 3.79 | 3.71 | 4.12 | 4.19 | 4.27 | 4.29 | 4.37 |
| TC1600438  | FTO            | 79068 fat mass and obesity associated             | 4.94E-05 | 2 | 4.12 | 4.12 | 4.07 | 4.25 | 4.33 | 4.42 | 4.46 | 4.28 |
| TC0601658  | FUCA2          | 2519 fucosidase, alpha-L- 2, plasma /// Plasn     | 3.25E-09 | 2 | 3.83 | 3.99 | 3.99 | 4.34 | 4.42 | 4.41 | 4.53 | 4.31 |
| TC1100766  | FUT4           | 2526 fucosyltransferase 4 (alpha (1,3) fucosy     | 4.80E-12 | 2 | 3.90 | 5.20 | 4.96 | 5.49 | 5.90 | 5.89 | 5.68 | 5.13 |
| TC1400305  | FUT8           | 2530 fucosyltransferase 8 (alpha (1,6) fucosy     | 1.56E-05 | 2 | 3.64 | 3.74 | 3.71 | 3.95 | 4.05 | 4.01 | 4.04 | 3.91 |
| TC0300945  | FYTTD1         | 84248 forty-two-three domain containing 1         | 3.84E-07 | 2 | 5.02 | 5.72 | 5.62 | 5.73 | 5.69 | 5.81 | 5.92 | 5.81 |
| TC0202261  | FZD5           | 7855 frizzled homolog 5 (Drosophila)              | 0.000184 | 2 | 4.53 | 4.75 | 4.79 | 4.73 | 4.89 | 4.88 | 4.83 | 4.69 |
| TC0500621  | G3BP1          | 10146 GTPase activating protein (SH3 domain       | 1.46E-11 | 2 | 5.36 | 5.10 | 5.35 | 5.75 | 5.81 | 5.80 | 5.81 | 5.65 |
| TC0401048  | G3BP2          | 9908 GTPase activating protein (SH3 domain        | 4.49E-06 | 2 | 5.24 | 5.60 | 5.52 | 5.67 | 5.57 | 5.66 | 5.70 | 5.69 |
| TC2100046  | GABPA          | 2551 GA binding protein transcription factor      | 0.000738 | 2 | 5.81 | 5.90 | 5.97 | 6.05 | 5.93 | 6.02 | 6.12 | 6.12 |
| TC1500947  | GABPB2         | 2553 GA binding protein transcription factor      | 7.73E-07 | 2 | 4.65 | 5.01 | 5.18 | 5.21 | 5.20 | 5.23 | 5.25 | 5.20 |
| TC0200187  | GALM           | 130589 galactose mutarotase (aldose 1-epimer      | 4.09E-07 | 2 | 4.33 | 4.57 | 4.31 | 4.65 | 4.83 | 5.16 | 5.23 | 5.09 |
| TC0700155  | GARS           | 2617 glycyl-tRNA synthetase /// Glycyl-tRNA       | 5.13E-05 | 2 | 4.33 | 4.50 | 4.57 | 4.63 | 4.69 | 4.71 | 4.84 | 4.71 |
| TC2100315  | GART           | 2618 phosphoribosylglycinamide formyltran:        | 0.000646 | 2 | 4.13 | 4.34 | 4.38 | 4.43 | 4.57 | 4.50 | 4.50 | 4.34 |
| TC0900304  | GCNT1          | 2650 glucosaminyl (N-acetyl) transferase 1, c     | 6.25E-08 | 2 | 4.80 | 5.63 | 5.41 | 5.54 | 5.78 | 5.61 | 5.61 | 5.44 |
| TC01r00012 | GCUD2          | 653573 gastric cancer up-regulated-2              | 0.000509 | 2 | 3.68 | 3.72 | 3.69 | 3.81 | 4.06 | 4.03 | 4.02 | 3.83 |
| TC1700877  | GEMIN4         | 50628 gem (nuclear organelle) associated pro      | 8.13E-05 | 2 | 4.35 | 4.39 | 4.35 | 4.38 | 4.62 | 4.57 | 4.51 | 4.38 |
| TC0200071  | GEN1           | 348654 Gen homolog 1, endonuclease (Drosop        | 0.000917 | 2 | 3.37 | 3.31 | 3.30 | 3.37 | 3.63 | 3.58 | 3.63 | 3.48 |
| TC0102438  | GFI1           | 2672 growth factor independent 1 transcript       | 1.47E-07 | 2 | 3.84 | 4.24 | 4.17 | 4.32 | 4.65 | 4.53 | 4.38 | 4.23 |
| TC0900661  | GFI1B          | 8328 growth factor independent 1B transcrip       | 0.000113 | 2 | 4.58 | 4.55 | 4.46 | 4.87 | 4.92 | 5.05 | 5.00 | 5.02 |
| TC0201589  | GFPT1          | 2673 glutamine-fructose-6-phosphate transa        | 2.43E-06 | 2 | 4.57 | 4.74 | 4.71 | 4.92 | 5.02 | 5.08 | 5.12 | 4.98 |
| TC0800973  | GGH            | 8836 gamma-glutamyl hydrolase (conjugase,         | 7.71E-12 | 2 | 3.45 | 4.03 | 4.12 | 4.57 | 5.01 | 4.84 | 4.65 | 4.31 |
| TC0700884  | GIMAP1 /// GI  | 170575 // GTPase, IMAP family member 1 /// GTF    | 9.46E-07 | 2 | 5.79 | 5.93 | 6.66 | 6.73 | 5.88 | 6.23 | 6.72 | 6.72 |
| TC0501187  | GIN1           | 54826 gypsy retrotransposon integrase 1 /// z     | 2.46E-05 | 2 | 3.68 | 4.13 | 4.41 | 4.33 | 4.34 | 4.40 | 4.29 | 4.36 |
| TC2000147  | GIN5           | 9837 GINS complex subunit 1 (Psf1 homolog         | 6.33E-05 | 2 | 3.77 | 3.84 | 3.84 | 3.93 | 4.24 | 4.16 | 4.06 | 3.93 |
| TC1601310  | GIN2           | 51659 GINS complex subunit 2 (Psf2 homolog        | 0.000214 | 2 | 3.06 | 3.05 | 2.97 | 3.17 | 3.40 | 3.37 | 3.34 | 3.16 |
| TC0102139  | GJA9 /// MYCB  | 81025 /// gap junction protein, alpha 9, 59kDa // | 3.89E-11 | 2 | 4.87 | 5.07 | 5.29 | 5.40 | 5.40 | 5.39 | 5.37 | 5.37 |
| TC0601227  | GLO1           | 2739 glyoxalase I                                 | 2.71E-07 | 2 | 3.54 | 3.66 | 3.61 | 4.02 | 4.07 | 3.99 | 4.10 | 4.04 |
| TC1000689  | GLRX3          | 10539 glutaredoxin 3                              | 1.31E-05 | 2 | 4.23 | 4.46 | 4.49 | 4.56 | 4.67 | 4.63 | 4.71 | 4.64 |
| TC1201113  | GLT8D3         | 283464 glycosyltransferase 8 domain containin     | 0.000161 | 2 | 4.06 | 4.03 | 4.22 | 4.18 | 4.18 | 4.28 | 4.38 | 4.42 |
| TC1900675  | GLTSCR2 /// SN | 29997 glioma tumor suppressor candidate reg       | 7.74E-06 | 2 | 5.71 | 5.88 | 5.68 | 6.00 | 6.08 | 5.98 | 6.17 | 6.02 |
| TC0100331  | GMEB1          | 10691 glucocorticoid modulatory element bin       | 1.37E-07 | 2 | 6.22 | 6.39 | 6.21 | 6.45 | 6.43 | 6.51 | 6.61 | 6.54 |



|           |                |            |                                            |          |   |      |      |      |      |      |      |      |      |
|-----------|----------------|------------|--------------------------------------------|----------|---|------|------|------|------|------|------|------|------|
| TC0600129 | GMNN           | 51053      | geminin, DNA replication inhibitor /// C   | 7.86E-07 | 2 | 3.47 | 3.63 | 3.62 | 3.90 | 4.08 | 4.02 | 4.12 | 3.90 |
| TC0300733 | GMPS           | 8833       | guanine monphosphate synthetase            | 2.73E-15 | 2 | 4.39 | 4.96 | 4.91 | 5.56 | 5.83 | 5.81 | 5.75 | 5.39 |
| TC2200115 | GNAZ           | 2781       | guanine nucleotide binding protein (G      | 0.000421 | 2 | 5.91 | 6.26 | 6.22 | 6.32 | 6.47 | 6.41 | 6.34 | 6.29 |
| TC0501574 | GNB2L1 /// SN  | 647756 //  | guanine nucleotide binding protein (G      | 0.0003   | 2 | 5.85 | 6.12 | 6.19 | 6.31 | 6.37 | 6.21 | 6.28 | 6.04 |
| TC0301784 | GNB4           | 59345      | guanine nucleotide binding protein (G      | 2.80E-05 | 2 | 6.03 | 6.07 | 6.35 | 6.39 | 6.20 | 6.36 | 6.45 | 6.55 |
| TC0700481 | GNG11          | 2791       | guanine nucleotide binding protein (G      | 4.62E-07 | 2 | 4.01 | 4.90 | 4.47 | 5.55 | 5.92 | 6.09 | 5.60 | 5.64 |
| TC0102389 | GNG5 /// CTBS  | 2787 /// 1 | guanine nucleotide binding protein (G      | 0.000371 | 2 | 7.31 | 7.55 | 7.73 | 7.72 | 7.63 | 7.75 | 7.64 | 7.71 |
| TC0102126 | GNL2           | 29889      | guanine nucleotide binding protein-like    | 6.30E-05 | 2 | 3.78 | 3.85 | 3.80 | 4.08 | 4.13 | 4.08 | 4.30 | 4.17 |
| TC0300312 | GNL3           | 26354      | guanine nucleotide binding protein-like    | 0.000136 | 2 | 4.00 | 4.11 | 4.14 | 4.16 | 4.28 | 4.28 | 4.45 | 4.21 |
| TC0101610 | GNPAT          | 8443       | glyceronephosphate O-acyltransferase       | 0.000414 | 2 | 4.95 | 5.01 | 5.30 | 5.37 | 5.32 | 5.21 | 5.29 | 5.06 |
| TC0200856 | GORASP2        | 26003      | golgi reassembly stacking protein 2, 55    | 6.84E-10 | 2 | 5.86 | 5.94 | 5.94 | 6.42 | 6.44 | 6.44 | 6.55 | 6.31 |
| TC2200036 | GP1BB /// SEP1 | 5413 /// 2 | septin 5 /// glycoprotein Ib (platelet), b | 1.58E-08 | 2 | 5.42 | 5.88 | 5.59 | 5.72 | 5.89 | 5.85 | 5.75 | 5.67 |
| TC0300129 | GPD1L          | 23171      | glycerol-3-phosphate dehydrogenase 1       | 1.90E-05 | 2 | 3.98 | 4.02 | 4.01 | 4.13 | 4.22 | 4.19 | 4.26 | 4.17 |
| TC0200802 | GPD2           | 2820       | glycerol-3-phosphate dehydrogenase 2       | 3.98E-08 | 2 | 5.30 | 5.63 | 5.66 | 5.95 | 6.13 | 6.19 | 6.21 | 5.99 |
| TC1900418 | GPI            | 2821       | glucose phosphate isomerase                | 9.01E-08 | 2 | 5.59 | 6.65 | 6.52 | 6.90 | 7.26 | 7.14 | 6.88 | 6.55 |
| TC0200135 | GPN1           | 11321      | GPN-loop GTPase 1                          | 8.99E-08 | 2 | 3.93 | 4.12 | 4.11 | 4.34 | 4.51 | 4.58 | 4.63 | 4.40 |
| TC0101639 | GPR137B        | 7107       | G protein-coupled receptor 137B /// In     | 2.83E-08 | 2 | 3.90 | 3.77 | 4.29 | 4.90 | 4.25 | 4.11 | 4.50 | 4.41 |
| TC0301666 | GPR171         | 29909      | G protein-coupled receptor 171             | 0.000188 | 2 | 2.77 | 2.90 | 2.79 | 3.14 | 3.12 | 3.08 | 3.40 | 3.14 |
| TC0100793 | GPSM2          | 29899      | G-protein signaling modulator 2 (AGS3-     | 1.21E-05 | 2 | 4.04 | 3.88 | 4.02 | 4.28 | 4.34 | 4.37 | 4.49 | 4.34 |
| TC1900250 | GPSN2          | 9524       | glycoprotein, synaptic 2                   | 2.09E-08 | 2 | 5.68 | 5.94 | 5.80 | 5.98 | 6.21 | 6.08 | 6.02 | 5.94 |
| TC0301205 | GPX1           | 2876       | glutathione peroxidase 1                   | 6.70E-05 | 2 | 5.58 | 5.70 | 5.70 | 6.04 | 6.25 | 6.19 | 6.07 | 6.00 |
| TC0401021 | GRSF1          | 2926       | G-rich RNA sequence binding factor 1       | 2.42E-10 | 2 | 4.80 | 5.15 | 5.21 | 5.28 | 5.33 | 5.25 | 5.29 | 5.19 |
| TC1100602 | GSTP1          | 2950       | glutathione S-transferase pi               | 8.06E-11 | 2 | 5.65 | 6.12 | 5.92 | 6.40 | 6.74 | 6.72 | 6.63 | 6.33 |
| TC1401033 | GTF2A1         | 2957       | general transcription factor IIA, 1, 19/3  | 0.000271 | 2 | 7.56 | 7.77 | 7.83 | 7.92 | 7.81 | 7.94 | 7.92 | 7.97 |
| TC0300540 | GTF2E1         | 2960       | general transcription factor IIE, polypep  | 3.74E-05 | 2 | 5.35 | 5.57 | 5.80 | 5.85 | 5.67 | 5.76 | 5.82 | 5.78 |
| TC0800846 | GTF2E2         | 2961       | general transcription factor IIE, polypep  | 7.22E-05 | 2 | 5.72 | 6.00 | 6.18 | 6.18 | 6.05 | 6.12 | 6.18 | 6.09 |
| TC1901084 | GTF2F1         | 2962       | general transcription factor IIF, polypep  | 0.000312 | 2 | 6.00 | 6.26 | 6.16 | 6.26 | 6.24 | 6.27 | 6.39 | 6.39 |
| TC1300049 | GTF3A          | ---        | Transcription factor IIIA (Factor A) (TFII | 6.08E-12 | 2 | 6.04 | 6.67 | 6.77 | 7.00 | 6.97 | 6.91 | 7.02 | 6.86 |
| TC0900657 | GTF3C4         | 9329       | general transcription factor IIIC, polype  | 9.50E-07 | 2 | 4.10 | 4.18 | 4.23 | 4.42 | 4.27 | 4.30 | 4.36 | 4.31 |
| TC0600641 | GTF3C6         | 112495     | general transcription factor IIIC, polype  | 4.21E-12 | 2 | 5.00 | 6.00 | 6.23 | 6.61 | 6.75 | 6.70 | 6.68 | 6.41 |
| TC1000005 | GTPBP4         | 23560      | GTP binding protein 4 /// Nucleolar GTI    | 5.89E-05 | 2 | 3.63 | 3.81 | 3.60 | 3.81 | 3.94 | 3.90 | 4.03 | 3.86 |
| TC1201267 | GTSF1          | 121355     | gametocyte specific factor 1               | 0.000572 | 2 | 3.81 | 4.18 | 4.19 | 4.26 | 4.31 | 4.44 | 4.38 | 4.23 |
| TC0701270 | GUSB           | 2990       | glucuronidase, beta /// Beta-glucuronic    | 5.30E-05 | 2 | 5.10 | 5.27 | 5.42 | 5.57 | 5.59 | 5.54 | 5.48 | 5.33 |
| TC2200262 | H1F0           | 3005       | H1 histone family, member 0                | 1.73E-11 | 2 | 4.62 | 5.74 | 5.36 | 5.86 | 6.22 | 6.44 | 6.28 | 5.79 |

|           |                         |            |                                          |          |   |      |      |      |      |      |      |      |      |
|-----------|-------------------------|------------|------------------------------------------|----------|---|------|------|------|------|------|------|------|------|
| TC0301548 | H1FX                    | 8971       | H1 histone family, member X              | 5.46E-05 | 2 | 4.38 | 4.55 | 4.39 | 4.70 | 4.81 | 4.79 | 4.79 | 4.82 |
| TC0701179 | H2AFV                   | 94239      | H2A histone family, member V             | 1.35E-06 | 2 | 7.42 | 7.52 | 7.57 | 7.78 | 7.86 | 7.93 | 7.92 | 7.84 |
| TC1101890 | H2AFX                   | 3014       | H2A histone family, member X             | 1.45E-06 | 2 | 5.16 | 5.47 | 5.36 | 5.61 | 5.81 | 5.77 | 5.61 | 5.49 |
| TC2100161 | H2BFS                   | ---        | Histone H2B type F-S (H2B.s) (H2B/s). [I | 3.30E-12 | 2 | 7.62 | 7.80 | 8.10 | 8.56 | 8.73 | 8.84 | 8.51 | 8.46 |
| TC0400448 | HADH                    | 3033       | hydroxyacyl-Coenzyme A dehydrogena       | 4.38E-06 | 2 | 3.62 | 3.65 | 3.65 | 3.69 | 3.93 | 3.83 | 3.85 | 3.76 |
| TC0101095 | HAX1                    | 10456      | HCLS1 associated protein X-1             | 0.0009   | 2 | 5.41 | 5.43 | 5.44 | 5.51 | 5.55 | 5.62 | 5.60 | 5.68 |
| TC1200650 | HCFC2                   | 29915      | host cell factor C2                      | 8.53E-05 | 2 | 4.31 | 4.49 | 4.57 | 4.72 | 4.88 | 4.81 | 4.93 | 4.75 |
| TC0700222 | hCG_18290               | 644907     | hCG18290                                 | 9.83E-07 | 2 | 7.87 | 7.83 | 7.75 | 8.27 | 8.42 | 8.46 | 8.53 | 8.28 |
| TC0500711 | hCG_1995786 , 653147 // | hCG1995786 | ribosomal protein L26                    | 5.15E-05 | 2 | 5.31 | 5.73 | 5.80 | 5.80 | 5.82 | 5.89 | 5.82 | 5.86 |
| TC0201062 | hCG_2024410 , 729020 // | rcRPE      | ribulose-5-phosphate-3-epim              | 3.93E-06 | 2 | 4.75 | 4.98 | 5.01 | 5.26 | 5.49 | 5.47 | 5.40 | 5.15 |
| TC1201304 | hCG_2026038 , 441050 // | hCG2026038 | prostaglandin E synth                    | 1.31E-06 | 2 | 5.07 | 5.18 | 5.39 | 5.36 | 5.34 | 5.40 | 5.41 | 5.36 |
| TC0102866 | HDGF                    | 3068       | hepatoma-derived growth factor (high-    | 1.17E-06 | 2 | 4.63 | 4.56 | 4.61 | 4.69 | 4.86 | 4.80 | 4.76 | 4.69 |
| TC1501193 | HDGFRP3                 | 50810      | hepatoma-derived growth factor, relat    | 0.000115 | 2 | 3.80 | 3.98 | 3.99 | 4.19 | 4.11 | 4.14 | 4.06 | 4.05 |
| TC1000461 | HELLS                   | 3070       | helicase, lymphoid-specific /// Lympho   | 6.21E-07 | 2 | 2.93 | 3.10 | 3.02 | 3.27 | 3.65 | 3.54 | 3.47 | 3.24 |
| TC0500271 | HEXB                    | 3074       | hexosaminidase B (beta polypeptide)      | 1.73E-10 | 2 | 5.41 | 5.35 | 5.46 | 5.78 | 5.68 | 5.91 | 5.91 | 5.85 |
| TC0700670 | HIG2 /// Q96HI          | 29923      | hypoxia-inducible protein 2 /// HIG2 pr  | 0.000923 | 2 | 3.95 | 3.97 | 4.03 | 4.06 | 4.07 | 4.17 | 4.15 | 4.10 |
| TC0500736 | HIGD2A                  | 192286     | HIG1 domain family, member 2A            | 4.62E-07 | 2 | 4.88 | 5.35 | 5.40 | 5.76 | 5.74 | 5.66 | 5.62 | 5.61 |
| TC0501263 | HINT1                   | 3094       | histidine triad nucleotide binding prote | 0.000243 | 2 | 4.65 | 4.71 | 4.81 | 4.87 | 4.95 | 4.94 | 5.00 | 4.97 |
| TC0600704 | HINT3                   | 135114     | histidine triad nucleotide binding prote | 9.81E-09 | 2 | 4.32 | 4.63 | 4.84 | 4.88 | 4.79 | 4.87 | 4.99 | 4.95 |
| TC0601052 | HIST1H1B                | 3009       | histone cluster 1, H1b                   | 1.99E-08 | 2 | 3.89 | 4.29 | 4.09 | 4.49 | 5.06 | 4.88 | 4.61 | 4.40 |
| TC0601027 | HIST1H1D                | 3007       | histone cluster 1, H1d                   | 1.29E-09 | 2 | 4.26 | 4.59 | 4.48 | 4.98 | 5.50 | 5.48 | 5.21 | 4.93 |
| TC0600148 | HIST1H1E                | 3008       | histone cluster 1, H1e                   | 2.21E-07 | 2 | 5.79 | 5.74 | 5.72 | 6.31 | 6.71 | 6.66 | 6.40 | 6.26 |
| TC0600153 | HIST1H2AB /// 8335 ///  | ε          | histone cluster 1, H2ab /// histone clus | 7.73E-19 | 2 | 6.05 | 7.71 | 7.71 | 8.56 | 9.20 | 9.44 | 8.87 | 8.45 |
| TC0601025 | HIST1H2AD               | 3013       | histone cluster 1, H2ad                  | 4.93E-13 | 2 | 3.88 | 3.97 | 4.19 | 4.56 | 4.68 | 4.92 | 4.62 | 4.46 |
| TC0600173 | HIST1H2AG               | 8969       | histone cluster 1, H2ag                  | 1.63E-07 | 2 | 2.89 | 3.24 | 3.43 | 4.18 | 4.14 | 4.22 | 3.98 | 4.13 |
| TC0600189 | HIST1H2AG /// 8969 ///  | ε          | histone cluster 1, H2ag /// histone clus | 6.16E-10 | 2 | 2.91 | 3.47 | 3.27 | 3.76 | 4.41 | 4.44 | 3.93 | 3.65 |
| TC0601056 | HIST1H2AG /// 8969 ///  | ε          | histone cluster 1, H2ag /// histone clus | 6.39E-09 | 2 | 3.86 | 4.39 | 4.17 | 4.73 | 5.35 | 5.29 | 4.91 | 4.54 |
| TC0600185 | HIST1H2AG /// 8969 ///  | ε          | histone cluster 1, H2ag /// histone clus | 1.12E-11 | 2 | 3.73 | 4.51 | 4.72 | 5.24 | 5.43 | 5.91 | 5.35 | 5.34 |
| TC0601049 | HIST1H2AJ               | 8331       | histone cluster 1, H2aj                  | 1.28E-11 | 2 | 5.27 | 5.87 | 5.76 | 6.25 | 6.74 | 6.78 | 6.38 | 5.98 |
| TC0601022 | HIST1H2BC               | 8347       | histone cluster 1, H2bc                  | 2.87E-06 | 2 | 7.69 | 7.52 | 7.53 | 7.86 | 8.06 | 8.33 | 7.96 | 8.10 |
| TC0600151 | HIST1H2BC /// 8347 ///  | ε          | histone cluster 1, H2bc /// histone clus | 2.79E-15 | 2 | 5.98 | 5.74 | 6.10 | 6.71 | 7.10 | 7.36 | 7.01 | 6.87 |
| TC0601026 | HIST1H2BC /// 8347 ///  | ε          | histone cluster 1, H2bc /// histone clus | 2.42E-16 | 2 | 5.07 | 5.48 | 5.60 | 6.36 | 6.78 | 6.97 | 6.53 | 6.22 |
| TC0600150 | HIST1H2BC /// 8347 ///  | ε          | histone cluster 1, H2bc /// histone clus | 1.60E-13 | 2 | 7.88 | 8.18 | 8.36 | 8.70 | 8.96 | 9.17 | 8.82 | 8.74 |
| TC0600149 | HIST1H2BD               | 3017       | histone cluster 1, H2bd                  | 3.02E-14 | 2 | 6.86 | 7.43 | 7.75 | 8.10 | 8.11 | 8.46 | 8.14 | 8.03 |

|           |                         |        |                                           |          |   |      |      |      |      |      |      |      |      |
|-----------|-------------------------|--------|-------------------------------------------|----------|---|------|------|------|------|------|------|------|------|
| TC0600156 | HIST1H2BH               | 8345   | histone cluster 1, H2bh                   | 6.74E-16 | 2 | 4.42 | 5.10 | 5.11 | 5.71 | 6.06 | 6.34 | 5.87 | 5.78 |
| TC0601041 | HIST1H2BJ               | 8970   | histone cluster 1, H2bj                   | 2.11E-12 | 2 | 3.47 | 3.84 | 4.01 | 4.41 | 4.61 | 4.63 | 4.29 | 4.26 |
| TC0601042 | HIST1H2BK               | 85236  | histone cluster 1, H2bk                   | 5.30E-10 | 2 | 7.68 | 7.86 | 8.27 | 8.77 | 8.86 | 8.96 | 8.61 | 8.63 |
| TC0601048 | HIST1H2BL               | 8340   | histone cluster 1, H2bl                   | 1.06E-11 | 2 | 3.89 | 4.04 | 4.12 | 4.45 | 4.76 | 4.78 | 4.44 | 4.44 |
| TC0600186 | HIST1H2BM               | 8342   | histone cluster 1, H2bm                   | 4.90E-13 | 2 | 2.78 | 3.66 | 3.46 | 4.65 | 5.54 | 5.51 | 4.88 | 4.31 |
| TC0600188 | HIST1H2BN               | 8341   | histone cluster 1, H2bn                   | 5.46E-08 | 2 | 3.27 | 3.32 | 3.35 | 3.43 | 3.55 | 3.73 | 3.55 | 3.53 |
| TC0600190 | HIST1H2BO               | 8348   | histone cluster 1, H2bo                   | 4.13E-11 | 2 | 4.25 | 4.40 | 4.39 | 4.79 | 5.11 | 5.24 | 4.88 | 4.81 |
| TC0600157 | HIST1H2BO /// 8348 ///  | ε      | histone cluster 1, H2bo /// histone clus  | 1.97E-12 | 2 | 5.24 | 5.48 | 5.72 | 6.06 | 6.37 | 6.45 | 6.09 | 5.92 |
| TC0601029 | HIST1H3F                | 8968   | histone cluster 1, H3f                    | 5.15E-08 | 2 | 4.08 | 4.57 | 4.55 | 4.88 | 5.20 | 5.35 | 4.91 | 4.62 |
| TC0601017 | HIST1H3F /// H 8968 /// | ε      | histone cluster 1, H3f /// histone cluste | 1.35E-08 | 2 | 3.42 | 3.70 | 3.57 | 4.09 | 4.45 | 4.46 | 4.19 | 3.90 |
| TC0600144 | HIST1H3F /// H 8968 /// | ε      | histone cluster 1, H3f /// histone cluste | 3.09E-05 | 2 | 2.31 | 2.56 | 2.49 | 2.56 | 2.87 | 2.75 | 2.65 | 2.56 |
| TC0601024 | HIST1H3F /// H 8968 /// | ε      | histone cluster 1, H3f /// histone cluste | 1.06E-08 | 2 | 6.76 | 6.87 | 7.28 | 7.42 | 7.33 | 7.79 | 7.57 | 7.59 |
| TC0601030 | HIST1H3F /// H 8968 /// | ε      | histone cluster 1, H3f /// histone cluste | 7.93E-09 | 2 | 3.40 | 3.96 | 4.13 | 4.65 | 5.30 | 5.35 | 4.61 | 4.34 |
| TC0601053 | HIST1H3F /// H 8968 /// | ε      | histone cluster 1, H3f /// histone cluste | 9.79E-10 | 2 | 3.05 | 4.00 | 3.72 | 4.81 | 5.58 | 5.48 | 4.74 | 4.39 |
| TC0101000 | HIST2H2AA3              | 8337   | histone cluster 2, H2aa3                  | 5.47E-11 | 2 | 8.54 | 9.06 | 9.48 | 9.80 | 9.74 | 9.64 | 9.36 | 9.44 |
| TC0102707 | HIST2H2AA3              | 8337   | histone cluster 2, H2aa3                  | 1.90E-05 | 2 | 8.59 | 8.75 | 8.97 | 9.43 | 9.36 | 9.31 | 9.02 | 9.10 |
| TC0102711 | HIST2H2AB               | 317772 | histone cluster 2, H2ab                   | 1.65E-07 | 2 | 4.04 | 4.79 | 5.08 | 5.39 | 5.98 | 5.85 | 5.37 | 5.28 |
| TC0101003 | HIST2H2AC               | 8338   | histone cluster 2, H2ac                   | 9.57E-06 | 2 | 7.53 | 8.15 | 8.16 | 8.30 | 8.49 | 8.43 | 8.26 | 8.29 |
| TC0600146 | HIST2H4A /// H 8370 /// | ε      | histone cluster 2, H4a /// histone cluste | 5.20E-08 | 2 | 6.31 | 6.13 | 6.04 | 6.66 | 7.22 | 7.30 | 6.95 | 6.71 |
| TC0601023 | HIST2H4A /// H 8370 /// | ε      | histone cluster 2, H4a /// histone cluste | 2.24E-08 | 2 | 3.11 | 3.33 | 3.31 | 3.58 | 4.17 | 4.04 | 3.79 | 3.66 |
| TC0600152 | HIST2H4A /// H 8370 /// | ε      | histone cluster 2, H4a /// histone cluste | 5.00E-10 | 2 | 7.00 | 7.63 | 7.29 | 8.05 | 8.61 | 8.73 | 8.44 | 7.97 |
| TC0601032 | HIST2H4A /// H 8370 /// | ε      | histone cluster 2, H4a /// histone cluste | 4.64E-09 | 2 | 5.53 | 5.92 | 5.52 | 5.96 | 6.01 | 6.71 | 6.52 | 6.53 |
| TC0600174 | HIST2H4A /// H 8370 /// | ε      | histone cluster 2, H4a /// histone cluste | 1.70E-06 | 2 | 4.14 | 4.26 | 4.27 | 4.50 | 4.69 | 4.78 | 4.56 | 4.40 |
| TC0600187 | HIST2H4A /// H 8370 /// | ε      | histone cluster 2, H4a /// histone cluste | 3.72E-07 | 2 | 5.46 | 5.31 | 5.14 | 5.62 | 5.89 | 5.82 | 5.63 | 5.48 |
| TC0601050 | HIST2H4A /// H 8370 /// | ε      | histone cluster 2, H4a /// histone cluste | 6.88E-08 | 2 | 4.20 | 4.58 | 4.52 | 4.70 | 4.98 | 4.95 | 4.83 | 4.70 |
| TC0601054 | HIST2H4A /// H 8370 /// | ε      | histone cluster 2, H4a /// histone cluste | 4.31E-06 | 2 | 2.44 | 2.92 | 2.84 | 3.28 | 3.65 | 3.42 | 3.00 | 3.03 |
| TC0202407 | HJURP                   | 55355  | Holliday junction recognition protein     | 2.39E-07 | 2 | 4.32 | 4.51 | 4.41 | 4.67 | 4.97 | 4.91 | 4.77 | 4.58 |
| TC0301646 | HLTF                    | 6596   | helicase-like transcription factor        | 0.00018  | 2 | 2.84 | 3.09 | 3.06 | 3.17 | 3.23 | 3.12 | 3.23 | 3.13 |
| TC2000857 | HMG1L1                  | 10357  | high-mobility group (nonhistone chrom     | 1.88E-06 | 2 | 3.59 | 4.03 | 4.26 | 4.19 | 4.28 | 4.29 | 4.26 | 4.17 |
| TC2200159 | HMG1L10                 | ---    | High mobility group protein 1-like 10 (H  | 1.55E-11 | 2 | 4.76 | 5.59 | 5.94 | 5.98 | 5.91 | 6.05 | 5.82 | 5.78 |
| TC0600317 | HMGA1                   | 3159   | high mobility group AT-hook 1 /// High    | 0.00072  | 2 | 5.28 | 5.42 | 5.42 | 5.45 | 5.54 | 5.47 | 5.43 | 5.39 |
| TC1300381 | HMGB1                   | 3146   | high-mobility group box 1 /// High mot    | 4.56E-10 | 2 | 5.59 | 5.70 | 5.87 | 6.00 | 6.03 | 6.02 | 6.04 | 5.94 |
| TC0X00662 | HMGB3                   | 3149   | high-mobility group box 3                 | 3.64E-10 | 2 | 4.62 | 4.94 | 4.73 | 5.15 | 5.59 | 5.48 | 5.46 | 5.03 |
| TC0500673 | HMMR                    | 3161   | hyaluronan-mediated motility receptor     | 7.98E-06 | 2 | 2.43 | 2.59 | 2.53 | 2.90 | 3.28 | 3.09 | 3.09 | 2.84 |

|           |                |        |                                           |          |   |       |       |       |       |       |       |       |       |
|-----------|----------------|--------|-------------------------------------------|----------|---|-------|-------|-------|-------|-------|-------|-------|-------|
| TC1600057 | HN1L /// HN1L  | 90861  | hematological and neurological expres     | 9.08E-06 | 2 | 4.66  | 4.95  | 4.87  | 4.93  | 5.05  | 5.10  | 5.09  | 5.00  |
| TC0501312 | HNRNPAO        | 10949  | heterogeneous nuclear ribonucleoprot      | 0.00044  | 2 | 5.37  | 5.43  | 5.32  | 5.47  | 5.58  | 5.62  | 5.69  | 5.63  |
| TC0500764 | HNRNPAB /// F  | 3182   | heterogeneous nuclear ribonucleoprot      | 5.08E-11 | 2 | 5.71  | 6.17  | 5.75  | 6.23  | 6.48  | 6.49  | 6.40  | 6.21  |
| TC0201442 | HNRPLL         | 92906  | heterogeneous nuclear ribonucleoprot      | 1.23E-05 | 2 | 4.72  | 5.13  | 5.16  | 5.25  | 5.37  | 5.43  | 5.42  | 5.21  |
| TC0300699 | HPS3           | 84343  | Hermansky-Pudlak syndrome 3               | 0.0006   | 2 | 5.42  | 5.33  | 5.42  | 5.62  | 5.50  | 5.54  | 5.66  | 5.58  |
| TC0401090 | HPSE           | 10855  | heparanase                                | 1.41E-11 | 2 | 5.44  | 6.10  | 6.28  | 7.04  | 6.82  | 6.82  | 6.75  | 6.29  |
| TC1800116 | HRH4           | 59340  | histamine receptor H4                     | 3.44E-05 | 2 | 3.41  | 3.07  | 3.60  | 4.55  | 3.93  | 4.37  | 4.68  | 4.54  |
| TC0801143 | HRSP12         | 10247  | heat-responsive protein 12                | 3.37E-06 | 2 | 3.98  | 3.86  | 4.17  | 4.30  | 4.20  | 4.19  | 4.30  | 4.27  |
| TC0100704 | HS2ST1 /// NM  | 9653   | heparan sulfate 2-O-sulfotransferase 1    | 8.48E-06 | 2 | 4.07  | 4.23  | 4.43  | 4.58  | 4.46  | 4.56  | 4.43  | 4.35  |
| TC0500420 | HSD17B4        | 3295   | hydroxysteroid (17-beta) dehydrogena      | 4.98E-13 | 2 | 5.56  | 5.46  | 5.51  | 6.01  | 5.86  | 6.08  | 6.30  | 6.11  |
| TC1200647 | HSP90B1        | 7184   | heat shock protein 90kDa beta (Grp94)     | 0.000951 | 2 | 7.57  | 7.85  | 7.55  | 7.81  | 8.05  | 8.12  | 8.30  | 7.93  |
| TC2100220 | HSPA13         | 6782   | heat shock protein 70kDa family, meml     | 2.09E-05 | 2 | 4.30  | 4.87  | 4.61  | 4.79  | 4.78  | 4.75  | 4.79  | 4.76  |
| TC0500476 | HSPA4          | 3308   | heat shock 70kDa protein 4 /// Heat sh    | 0.00028  | 2 | 5.94  | 6.46  | 6.43  | 6.49  | 6.42  | 6.50  | 6.67  | 6.54  |
| TC0501326 | HSPA9          | 440490 | // heat shock 70kDa protein 9 (mortalin)  | 6.46E-08 | 2 | 4.77  | 5.10  | 4.70  | 5.38  | 5.52  | 5.55  | 5.68  | 5.38  |
| TC0501516 | HSPC111 /// U: | 51491  | hypothetical protein HSPC111 /// UPF0     | 0.000681 | 2 | 3.98  | 4.10  | 3.94  | 4.17  | 4.28  | 4.22  | 4.40  | 4.19  |
| TC1101514 | HSPC152        | 51504  | hypothetical protein HSPC152              | 6.85E-11 | 2 | 7.11  | 7.27  | 7.30  | 7.48  | 7.49  | 7.56  | 7.54  | 7.54  |
| TC0200960 | HSPE1          | 3336   | heat shock 10kDa protein 1 (chaperoni     | 1.89E-11 | 2 | 4.43  | 5.20  | 4.69  | 5.30  | 5.78  | 5.79  | 5.70  | 5.38  |
| TC1300382 | HSPH1          | 10808  | heat shock 105kDa/110kDa protein 1 /,     | 0.000158 | 2 | 3.54  | 4.33  | 3.89  | 4.35  | 4.72  | 4.45  | 4.65  | 4.33  |
| TC0X00595 | HTATSF1        | 27336  | HIV-1 Tat specific factor 1               | 5.63E-06 | 2 | 4.40  | 4.52  | 4.58  | 4.85  | 4.93  | 4.98  | 5.04  | 4.85  |
| TC0901128 | IARS           | 3376   | isoleucyl-tRNA synthetase /// Isoleucyl-  | 1.11E-05 | 2 | 3.62  | 3.72  | 3.65  | 3.86  | 4.12  | 4.06  | 4.07  | 3.85  |
| TC0601422 | IBTK           | 25998  | inhibitor of Bruton agammaglobulinem      | 1.55E-08 | 2 | 3.40  | 3.61  | 3.68  | 4.01  | 4.05  | 4.04  | 4.19  | 4.05  |
| TC0701013 | ICA1           | 3382   | islet cell autoantigen 1, 69kDa /// Islet | 0.000509 | 2 | 3.71  | 4.06  | 3.85  | 4.01  | 4.25  | 4.15  | 4.06  | 3.86  |
| TC0601336 | ICK            | 22858  | intestinal cell (MAK-like) kinase         | 9.52E-05 | 2 | 4.30  | 4.37  | 4.32  | 4.49  | 4.46  | 4.54  | 4.64  | 4.58  |
| TC0101810 | ICMT           | 23463  | isoprenylcysteine carboxyl methyltrans    | 3.88E-05 | 2 | 3.41  | 3.53  | 3.53  | 3.64  | 3.75  | 3.68  | 3.79  | 3.63  |
| TC1700748 | ICT1           | 3396   | immature colon carcinoma transcript 1     | 5.85E-07 | 2 | 4.82  | 4.99  | 5.02  | 5.24  | 5.43  | 5.40  | 5.45  | 5.17  |
| TC0200023 | ID2            | 3398   | inhibitor of DNA binding 2, dominant n    | 4.00E-15 | 2 | 5.23  | 5.17  | 5.15  | 5.34  | 5.49  | 5.63  | 5.63  | 5.58  |
| TC1001164 | IDE            | 3416   | insulin-degrading enzyme /// Insulin-de   | 7.96E-05 | 2 | 3.52  | 3.75  | 3.83  | 3.95  | 4.06  | 3.94  | 3.98  | 3.81  |
| TC0202273 | IDH1           | 3417   | isocitrate dehydrogenase 1 (NADP+), sc    | 3.13E-20 | 2 | 4.65  | 4.71  | 5.02  | 5.45  | 5.36  | 5.16  | 5.28  | 5.02  |
| TC1800452 | IER3IP1        | 51124  | immediate early response 3 interacting    | 9.44E-10 | 2 | 4.45  | 5.94  | 6.00  | 6.23  | 6.34  | 6.33  | 6.30  | 5.98  |
| TC0101334 | IER5           | 51278  | immediate early response 5                | 1.77E-10 | 2 | 4.86  | 4.83  | 4.72  | 5.34  | 5.27  | 5.39  | 5.52  | 5.60  |
| TC0101172 | IFI16          | 3428   | interferon, gamma-inducible protein 16    | 4.10E-06 | 2 | 9.14  | 9.65  | 9.38  | 9.34  | 9.27  | 9.55  | 9.70  | 9.67  |
| TC1900316 | IFI30          | 10437  | interferon, gamma-inducible protein 30    | 5.07E-06 | 2 | 9.77  | 10.17 | 10.41 | 10.70 | 10.39 | 10.38 | 10.52 | 10.41 |
| TC1100010 | IFITM1         | 8519   | interferon induced transmembrane prc      | 0.000898 | 2 | 10.44 | 10.75 | 10.89 | 10.95 | 10.76 | 10.88 | 10.88 | 10.92 |
| TC1101031 | IFITM3         | 10410  | interferon induced transmembrane prc      | 0.000404 | 2 | 9.55  | 10.36 | 10.17 | 10.31 | 10.32 | 10.60 | 10.51 | 10.68 |

|           |                |                                                 |          |   |      |      |      |      |      |      |      |      |
|-----------|----------------|-------------------------------------------------|----------|---|------|------|------|------|------|------|------|------|
| TC0900105 | IFT74          | 80173 intraflagellar transport 74 homolog (Ch   | 1.88E-05 | 2 | 3.65 | 4.06 | 4.16 | 4.14 | 4.04 | 4.24 | 4.33 | 4.22 |
| TC0400977 | IGFBP7         | 3490 insulin-like growth factor binding prote   | 5.19E-13 | 2 | 4.91 | 5.24 | 5.60 | 5.81 | 5.80 | 5.68 | 5.81 | 5.64 |
| TC0401019 | IGJ            | 3512 immunoglobulin J polypeptide, linker p     | 3.93E-05 | 2 | 3.30 | 3.42 | 3.32 | 3.68 | 4.62 | 4.25 | 4.02 | 3.87 |
| TC1000747 | IL2RA          | 3559 interleukin 2 receptor, alpha /// Interle  | 3.70E-06 | 2 | 4.20 | 4.18 | 4.30 | 4.91 | 4.49 | 4.74 | 5.02 | 4.98 |
| TC0X01008 | IL2RG          | 3561 interleukin 2 receptor, gamma (severe      | 0.000167 | 2 | 8.82 | 8.98 | 9.03 | 9.40 | 9.21 | 9.10 | 9.04 | 9.01 |
| TC1101286 | IMMP1L         | 196294 IMP1 inner mitochondrial membrane p      | 1.34E-08 | 2 | 2.51 | 2.59 | 2.54 | 2.77 | 3.04 | 3.02 | 2.95 | 2.86 |
| TC1501118 | IMP3           | 55272 IMP3, U3 small nucleolar ribonucleopr     | 0.000536 | 2 | 4.02 | 4.03 | 4.05 | 4.19 | 4.43 | 4.31 | 4.45 | 4.46 |
| TC1800114 | IMPACT         | 55364 Impact homolog (mouse)                    | 4.02E-08 | 2 | 4.46 | 5.34 | 5.45 | 5.66 | 5.61 | 5.74 | 5.80 | 5.53 |
| TC0400708 | ING2           | 3622 inhibitor of growth family, member 2       | 8.53E-06 | 2 | 5.80 | 6.32 | 6.14 | 6.28 | 6.24 | 6.32 | 6.40 | 6.30 |
| TC0701154 | INHBA          | 3624 inhibin, beta A                            | 2.70E-12 | 2 | 2.40 | 3.40 | 2.87 | 3.56 | 4.24 | 4.13 | 3.84 | 3.47 |
| TC1000634 | INPP5F         | 22876 inositol polyphosphate-5-phosphatase      | 6.28E-06 | 2 | 3.88 | 3.79 | 3.88 | 3.99 | 4.02 | 4.01 | 4.04 | 3.97 |
| TC0700914 | INSIG1         | 3638 insulin induced gene 1                     | 8.32E-08 | 2 | 5.13 | 5.44 | 5.41 | 5.66 | 5.75 | 5.81 | 5.64 | 5.58 |
| TC1901105 | INSR           | 3643 insulin receptor                           | 7.55E-05 | 2 | 3.90 | 4.16 | 4.02 | 4.09 | 4.19 | 4.16 | 4.09 | 4.04 |
| TC0103211 | INTS7          | 25896 integrator complex subunit 7 /// Integr   | 1.88E-08 | 2 | 3.41 | 3.46 | 3.44 | 3.68 | 3.84 | 3.77 | 3.90 | 3.73 |
| TC0500206 | IPO11 /// Q7Z2 | 51194 importin 11 /// Synleurin (CGLQ1891).     | 3.04E-09 | 2 | 2.73 | 2.79 | 2.95 | 3.05 | 3.08 | 2.94 | 2.94 | 2.88 |
| TC1300243 | IPO5 /// RANBI | 3843 importin 5 /// Importin beta-3 (Karyopl    | 1.00E-08 | 2 | 3.36 | 3.52 | 3.42 | 3.64 | 3.90 | 3.90 | 3.98 | 3.77 |
| TC1100160 | IPO7           | 10527 importin 7                                | 3.06E-06 | 2 | 3.45 | 4.09 | 4.19 | 4.30 | 4.43 | 4.30 | 4.36 | 4.12 |
| TC0101409 | IPO9           | 55705 importin 9                                | 6.26E-06 | 2 | 4.04 | 3.98 | 3.87 | 4.13 | 4.29 | 4.20 | 4.31 | 4.17 |
| TC0301914 | IQCG           | 84223 IQ motif containing G                     | 5.68E-05 | 2 | 3.36 | 3.45 | 3.40 | 3.56 | 3.65 | 3.60 | 3.64 | 3.57 |
| TC0103363 | IRF2BP2        | 359948 interferon regulatory factor 2 binding p | 3.47E-18 | 2 | 6.23 | 6.36 | 6.29 | 7.02 | 7.26 | 7.23 | 7.17 | 6.98 |
| TC0901093 | ISCA1          | 81689 iron-sulfur cluster assembly 1 homolog    | 0.000379 | 2 | 4.54 | 4.47 | 4.61 | 4.79 | 4.83 | 4.86 | 4.85 | 4.78 |
| TC1400370 | ISCA2          | 122961 iron-sulfur cluster assembly 2 homolog   | 5.23E-07 | 2 | 5.66 | 6.03 | 6.14 | 6.20 | 6.22 | 6.29 | 6.34 | 6.36 |
| TC0200863 | ITGA6          | 3655 integrin, alpha 6 /// Integrin alpha-6 pr  | 3.10E-06 | 2 | 5.42 | 6.29 | 5.64 | 6.04 | 5.96 | 6.33 | 6.46 | 6.29 |
| TC0300153 | ITGA9          | 3680 integrin, alpha 9                          | 6.10E-10 | 2 | 3.74 | 4.03 | 3.88 | 4.25 | 4.66 | 4.68 | 4.44 | 4.11 |
| TC0200926 | ITGAV          | 3685 integrin, alpha V (vitronectin receptor,   | 4.61E-06 | 2 | 4.03 | 3.96 | 4.11 | 4.26 | 4.30 | 4.33 | 4.29 | 4.24 |
| TC1000874 | ITGB1          | 3688 integrin, beta 1 (fibronectin receptor, b  | 5.02E-07 | 2 | 4.64 | 5.28 | 5.20 | 5.71 | 5.75 | 5.67 | 5.51 | 5.39 |
| TC1700547 | ITGB3          | 3690 integrin, beta 3 (platelet glycoprotein II | 4.88E-06 | 2 | 4.21 | 4.67 | 4.62 | 5.94 | 6.28 | 5.97 | 5.60 | 5.46 |
| TC0102318 | ITGB3BP        | 23421 integrin beta 3 binding protein (beta3-ε  | 3.09E-07 | 2 | 3.08 | 3.47 | 3.46 | 3.71 | 3.85 | 3.76 | 3.65 | 3.64 |
| TC0201165 | ITM2C          | 81618 integral membrane protein 2C              | 2.46E-10 | 2 | 5.03 | 4.91 | 4.96 | 5.24 | 5.39 | 5.42 | 5.55 | 5.44 |
| TC2000554 | JAG1           | 182 jagged 1 (Alagille syndrome)                | 0.000301 | 2 | 3.98 | 3.98 | 4.05 | 4.21 | 4.19 | 4.19 | 4.20 | 4.13 |
| TC0300032 | JAGN1          | 84522 jagunal homolog 1 (Drosophila) /// jagu   | 1.35E-07 | 2 | 4.50 | 4.70 | 4.87 | 5.05 | 4.99 | 4.97 | 5.01 | 4.93 |
| TC1101015 | JAM3           | 83700 junctional adhesion molecule 3            | 0.000851 | 2 | 3.99 | 4.32 | 4.08 | 4.45 | 4.72 | 4.82 | 4.59 | 4.52 |
| TC0701095 | JAZF1          | 221895 JAZF zinc finger 1                       | 1.88E-05 | 2 | 6.33 | 6.52 | 6.61 | 6.86 | 6.77 | 6.70 | 6.72 | 6.65 |
| TC0102803 | JTB            | 10899 jumping translocation breakpoint /// P    | 1.70E-07 | 2 | 5.85 | 5.90 | 6.16 | 6.19 | 6.19 | 6.22 | 6.23 | 6.23 |

|           |                 |        |                                            |          |   |      |      |      |      |      |      |      |      |
|-----------|-----------------|--------|--------------------------------------------|----------|---|------|------|------|------|------|------|------|------|
| TC0800010 | KBTBD11         | 9920   | kelch repeat and BTB (POZ) domain cor      | 9.51E-08 | 2 | 5.61 | 5.76 | 5.75 | 5.96 | 6.06 | 6.15 | 6.34 | 6.27 |
| TC1300555 | KCTD12          | 115207 | potassium channel tetramerisation dor      | 8.40E-07 | 2 | 7.05 | 6.97 | 7.49 | 7.66 | 7.43 | 7.41 | 7.44 | 7.45 |
| TC0101514 | KCTD3           | 51133  | potassium channel tetramerisation dor      | 4.30E-05 | 2 | 2.94 | 3.03 | 3.08 | 3.09 | 3.31 | 3.24 | 3.20 | 3.08 |
| TC1101809 | KDELC2          | 143888 | KDEL (Lys-Asp-Glu-Leu) containing 2 ///    | 0.000416 | 2 | 3.84 | 3.95 | 3.98 | 4.00 | 4.13 | 4.09 | 4.05 | 4.04 |
| TC0900747 | KIAA0020        | 9933   | KIAA0020                                   | 5.76E-06 | 2 | 3.64 | 3.70 | 3.67 | 3.83 | 3.98 | 3.96 | 4.03 | 3.84 |
| TC1000669 | KIAA0157        | 23172  | KIAA0157 /// Uncharacterized protein l     | 6.33E-07 | 2 | 5.22 | 5.95 | 6.10 | 6.22 | 6.04 | 6.09 | 6.14 | 6.07 |
| TC0801238 | KIAA0196        | 9897   | KIAA0196                                   | 0.000614 | 2 | 5.15 | 5.16 | 5.30 | 5.55 | 5.47 | 5.50 | 5.59 | 5.37 |
| TC0301141 | KIAA1143        | 57456  | KIAA1143                                   | 4.86E-05 | 2 | 5.64 | 5.90 | 5.86 | 6.12 | 6.01 | 6.14 | 6.30 | 6.29 |
| TC0501514 | KIAA1191        | 57179  | KIAA1191                                   | 9.56E-05 | 2 | 4.35 | 4.51 | 4.42 | 4.64 | 4.75 | 4.61 | 4.76 | 4.69 |
| TC1400140 | KIAA1333        | 55632  | KIAA1333                                   | 0.000444 | 2 | 3.45 | 3.62 | 3.78 | 3.78 | 3.76 | 3.82 | 3.88 | 3.90 |
| TC0301429 | KIAA1524        | 57650  | KIAA1524                                   | 0.000209 | 2 | 2.44 | 2.58 | 2.59 | 2.71 | 3.00 | 2.93 | 2.87 | 2.75 |
| TC0200272 | KIAA1841        | 84542  | KIAA1841 /// CDNA FLJ16202 fis, clone      | 2.90E-05 | 2 | 3.95 | 3.87 | 4.05 | 4.27 | 4.16 | 4.20 | 4.29 | 4.22 |
| TC0101861 | KIAA2013        | 90231  | KIAA2013 /// KIAA2013. [Source:Uniprc      | 0.00016  | 2 | 7.25 | 7.21 | 7.33 | 7.45 | 7.43 | 7.49 | 7.42 | 7.51 |
| TC1000447 | KIF11           | 3832   | kinesin family member 11                   | 2.16E-09 | 2 | 3.08 | 3.47 | 3.26 | 3.81 | 4.37 | 4.34 | 4.16 | 3.70 |
| TC0103109 | KIF14           | 9928   | kinesin family member 14                   | 5.48E-06 | 2 | 2.56 | 2.79 | 2.81 | 3.06 | 3.32 | 3.11 | 3.07 | 2.88 |
| TC0300219 | KIF15           | 56992  | kinesin family member 15 /// kinesin fa    | 7.49E-07 | 2 | 2.92 | 3.09 | 3.07 | 3.43 | 3.76 | 3.68 | 3.60 | 3.32 |
| TC1101279 | KIF18A          | 81930  | kinesin family member 18A                  | 1.26E-06 | 2 | 2.44 | 2.55 | 2.53 | 2.67 | 3.01 | 2.85 | 2.81 | 2.72 |
| TC0500505 | KIF20A          | 10112  | kinesin family member 20A                  | 1.41E-05 | 2 | 3.11 | 3.28 | 3.22 | 3.42 | 3.73 | 3.67 | 3.51 | 3.34 |
| TC1600317 | KIF22           | 3835   | kinesin family member 22                   | 0.000722 | 2 | 5.31 | 5.28 | 5.25 | 5.31 | 5.41 | 5.42 | 5.43 | 5.34 |
| TC1500437 | KIF23           | 9493   | kinesin family member 23                   | 1.96E-07 | 2 | 3.13 | 3.23 | 3.13 | 3.46 | 3.82 | 3.74 | 3.70 | 3.47 |
| TC0500205 | KIF2A           | 3796   | kinesin heavy chain member 2A /// Kin      | 6.20E-10 | 2 | 5.96 | 6.80 | 6.82 | 7.15 | 7.28 | 7.46 | 7.32 | 7.21 |
| TC0X00328 | KIF4B /// KIF4A | 285643 | // kinesin family member 4B /// kinesin fa | 3.33E-05 | 2 | 3.24 | 3.36 | 3.27 | 3.48 | 3.78 | 3.73 | 3.65 | 3.44 |
| TC0600311 | KIFC1           | 3833   | kinesin family member C1                   | 6.88E-08 | 2 | 3.97 | 4.12 | 4.07 | 4.40 | 4.70 | 4.64 | 4.61 | 4.31 |
| TC0200031 | KLF11           | 8462   | Kruppel-like factor 11                     | 0.000168 | 2 | 4.15 | 4.53 | 4.51 | 4.55 | 4.50 | 4.59 | 4.55 | 4.61 |
| TC1300195 | KLF5            | 688    | Kruppel-like factor 5 (intestinal)         | 1.10E-11 | 2 | 4.80 | 5.82 | 5.62 | 5.66 | 5.93 | 5.99 | 5.82 | 5.62 |
| TC0700111 | KLHL7           | 55975  | kelch-like 7 (Drosophila) /// Kelch-like p | 9.71E-05 | 2 | 4.48 | 4.80 | 4.98 | 5.04 | 4.85 | 4.90 | 5.06 | 5.02 |
| TC1200780 | KNTC1           | 9735   | kinetochore associated 1                   | 2.91E-05 | 2 | 3.31 | 3.15 | 3.12 | 3.32 | 3.61 | 3.57 | 3.58 | 3.38 |
| TC0600668 | KPNA5           | 3841   | karyopherin alpha 5 (importin alpha 6)     | 1.80E-05 | 2 | 3.24 | 3.54 | 3.64 | 3.81 | 3.66 | 3.68 | 3.75 | 3.81 |
| TC1701313 | KRT222P /// SN  | 125113 | // keratin 222 pseudogene /// SWI/SNF re   | 1.38E-05 | 2 | 4.48 | 4.68 | 4.73 | 4.77 | 4.75 | 4.73 | 4.81 | 4.75 |
| TC0102824 | KRTCAP2         | 200185 | keratinocyte associated protein 2          | 1.46E-08 | 2 | 4.60 | 4.65 | 4.75 | 4.85 | 4.93 | 4.90 | 4.93 | 4.82 |
| TC0300527 | KTELC1          | 56983  | KTEL (Lys-Tyr-Glu-Leu) containing 1        | 0.000309 | 2 | 3.28 | 3.31 | 3.37 | 3.46 | 3.49 | 3.47 | 3.58 | 3.58 |
| TC0801019 | LACTB2          | 51110  | lactamase, beta 2                          | 3.60E-11 | 2 | 3.69 | 3.93 | 4.03 | 4.22 | 4.27 | 4.50 | 4.60 | 4.38 |
| TC0X01385 | LAGE3           | 8270   | L antigen family, member 3                 | 0.000973 | 2 | 4.13 | 4.43 | 4.48 | 4.32 | 4.59 | 4.61 | 4.49 | 4.33 |
| TC0X01198 | LAMP2           | 3920   | lysosomal-associated membrane prote        | 0.000207 | 2 | 8.99 | 9.05 | 8.99 | 9.14 | 9.10 | 9.21 | 9.15 | 9.29 |

|           |               |                                                       |          |   |      |      |      |      |      |      |      |      |
|-----------|---------------|-------------------------------------------------------|----------|---|------|------|------|------|------|------|------|------|
| TC0301799 | LAMP3         | 27074 lysosomal-associated membrane prote             | 0.000241 | 2 | 4.26 | 4.50 | 4.38 | 4.44 | 4.37 | 4.55 | 4.77 | 4.80 |
| TC0500632 | LARP1         | 23367 La ribonucleoprotein domain family, m           | 9.42E-09 | 2 | 5.69 | 5.98 | 6.01 | 6.56 | 6.61 | 6.52 | 6.57 | 6.28 |
| TC0400525 | LARP2         | 648136 // La ribonucleoprotein domain family, m       | 7.84E-09 | 2 | 3.79 | 4.11 | 4.33 | 4.42 | 4.42 | 4.36 | 4.33 | 4.25 |
| TC1200328 | LARP4         | 113251 La ribonucleoprotein domain family, m          | 1.44E-09 | 2 | 3.82 | 4.21 | 4.30 | 4.53 | 4.56 | 4.49 | 4.54 | 4.43 |
| TC0501379 | LARS          | 51520 leucyl-tRNA synthetase /// Leucyl-tRNA          | 6.67E-11 | 2 | 4.04 | 4.11 | 3.99 | 4.53 | 4.76 | 4.75 | 4.85 | 4.53 |
| TC0200835 | LASS6         | 253782 LAG1 homolog, ceramide synthase 6              | 3.85E-13 | 2 | 4.04 | 4.21 | 4.15 | 4.64 | 4.97 | 5.03 | 5.07 | 4.63 |
| TC1600276 | LCMT1         | 51451 leucine carboxyl methyltransferase 1 //         | 9.39E-10 | 2 | 4.39 | 4.46 | 4.55 | 4.92 | 4.94 | 4.81 | 4.97 | 4.76 |
| TC1500887 | LCMT2         | 9836 leucine carboxyl methyltransferase 2             | 1.54E-05 | 2 | 3.91 | 3.96 | 3.97 | 4.06 | 4.16 | 4.15 | 4.34 | 4.19 |
| TC0400845 | LCORL         | 254251 ligand dependent nuclear receptor cor          | 0.000393 | 2 | 4.41 | 4.61 | 4.62 | 4.66 | 4.61 | 4.80 | 4.91 | 4.75 |
| TC1901793 | LENG1         | 79165 leukocyte receptor cluster (LRC) memb           | 0.000172 | 2 | 6.84 | 6.81 | 6.77 | 6.91 | 6.97 | 7.01 | 6.95 | 7.01 |
| TC1500960 | LEO1          | 123169 Leo1, Paf1/RNA polymerase II complex           | 6.72E-07 | 2 | 5.01 | 5.05 | 5.33 | 5.84 | 5.75 | 5.69 | 5.96 | 5.64 |
| TC0100626 | LEPROT ///    | LEP54741 /// leptin receptor overlapping transcript / | 6.22E-06 | 2 | 3.62 | 3.69 | 3.81 | 3.83 | 3.88 | 3.96 | 3.90 | 3.88 |
| TC1901649 | LIG1          | 3978 ligase I, DNA, ATP-dependent                     | 0.000168 | 2 | 4.94 | 4.91 | 4.89 | 4.98 | 5.11 | 5.07 | 5.05 | 4.99 |
| TC0700384 | LIMK1         | 3984 LIM domain kinase 1                              | 4.50E-05 | 2 | 5.35 | 5.36 | 5.37 | 5.62 | 5.73 | 5.83 | 5.70 | 5.62 |
| TC0103284 | LIN9          | 286826 lin-9 homolog (C. elegans) /// Lin-9 hon       | 2.21E-05 | 2 | 2.98 | 3.15 | 3.22 | 3.30 | 3.39 | 3.31 | 3.23 | 3.29 |
| TC0100931 | LIX1L         | 128077 Lix1 homolog (mouse)-like                      | 0.000827 | 2 | 5.48 | 5.53 | 5.79 | 5.84 | 5.63 | 5.72 | 5.73 | 5.73 |
| TC1800510 | LMAN1         | 3998 lectin, mannose-binding, 1                       | 1.51E-12 | 2 | 3.33 | 3.62 | 3.45 | 4.13 | 4.63 | 4.60 | 4.63 | 4.20 |
| TC0500916 | LMBRD2        | 92255 LMBR1 domain containing 2                       | 6.37E-05 | 2 | 4.17 | 4.35 | 4.72 | 4.73 | 4.56 | 4.65 | 4.64 | 4.57 |
| TC1901022 | LMNB2         | 84823 lamin B2                                        | 3.89E-06 | 2 | 5.12 | 5.41 | 5.35 | 5.42 | 5.58 | 5.49 | 5.48 | 5.41 |
| TC1101300 | LMO2          | 4005 LIM domain only 2 (rhombotin-like 1)             | 0.000679 | 2 | 4.96 | 5.03 | 5.14 | 5.16 | 5.18 | 5.09 | 5.15 | 5.10 |
| TC0100705 | LMO4          | 8543 LIM domain only 4                                | 5.32E-12 | 2 | 4.87 | 5.16 | 5.37 | 5.43 | 5.23 | 5.35 | 5.43 | 5.44 |
| TC1300362 | LNX2          | 222484 ligand of numb-protein X 2                     | 1.08E-07 | 2 | 4.54 | 4.60 | 4.53 | 4.76 | 4.76 | 4.79 | 4.86 | 4.82 |
| TC1900243 | LOC113230     | 113230 hypothetical protein LOC113230                 | 6.46E-05 | 2 | 4.83 | 5.15 | 5.14 | 5.32 | 5.29 | 5.23 | 5.21 | 5.12 |
| TC0201859 | LOC130355     | 130355 hypothetical protein LOC130355                 | 4.97E-10 | 2 | 4.83 | 5.24 | 5.73 | 5.60 | 5.58 | 5.59 | 5.56 | 5.53 |
| TC0200971 | LOC26010      | 26010 viral DNA polymerase-transactivated pi          | 3.39E-07 | 2 | 3.73 | 3.97 | 3.80 | 4.11 | 4.12 | 4.43 | 4.70 | 4.59 |
| TC0500145 | LOC285636     | 285636 hypothetical protein LOC285636                 | 4.08E-05 | 2 | 4.45 | 4.91 | 5.01 | 4.99 | 4.94 | 5.13 | 5.12 | 5.02 |
| TC1900679 | LOC374920     | 374920 hypothetical protein LOC374920                 | 0.000727 | 2 | 5.23 | 5.30 | 5.30 | 5.37 | 5.50 | 5.40 | 5.66 | 5.53 |
| TC0400142 | LOC389203     | 389203 hypothetical gene supported by BC032           | 7.99E-08 | 2 | 4.91 | 5.37 | 5.67 | 5.59 | 5.57 | 5.59 | 5.64 | 5.62 |
| TC2200320 | LOC389901 /// | 389901 // hypothetical LOC389901 /// X-ray repa       | 0.000371 | 2 | 6.54 | 7.02 | 6.70 | 6.91 | 6.99 | 7.06 | 7.18 | 7.00 |
| TC0601271 | LOC441150     | 441150 similar to RIKEN cDNA 2310039H08               | 0.000165 | 2 | 4.56 | 4.75 | 4.77 | 4.96 | 5.15 | 4.98 | 4.95 | 4.92 |
| TC0700339 | LOC441241 /// | 441241 // vitamin K epoxide reductase complex, s      | 8.60E-06 | 2 | 4.49 | 5.07 | 5.18 | 5.28 | 5.51 | 5.50 | 5.43 | 5.30 |
| TC1300622 | LOC441377     | 441377 similar to ribosomal protein S26               | 8.30E-09 | 2 | 5.79 | 6.40 | 6.48 | 6.70 | 6.86 | 6.73 | 6.67 | 6.66 |
| TC1300218 | LOC441454     | 441454 hypothetical gene supported by BC013           | 2.57E-16 | 2 | 5.81 | 5.97 | 5.69 | 6.39 | 6.69 | 6.82 | 6.85 | 6.65 |
| TC0500414 | LOC643287     | 643287 similar to prothymosin alpha                   | 6.81E-15 | 2 | 7.68 | 7.71 | 7.47 | 8.10 | 8.41 | 8.47 | 8.49 | 8.35 |

|           |                                                                   |          |   |      |       |       |       |       |       |       |       |
|-----------|-------------------------------------------------------------------|----------|---|------|-------|-------|-------|-------|-------|-------|-------|
| TC1600906 | LOC644790 /// 644790 // hypothetical LOC644790 /// ribosomal      | 2.04E-08 | 2 | 7.83 | 8.24  | 8.21  | 8.32  | 8.41  | 8.33  | 8.29  | 8.23  |
| TC0101809 | LOC645231 /// 645231 // similar to 60S ribosomal protein L22 (H   | 9.90E-09 | 2 | 7.98 | 8.65  | 8.31  | 8.94  | 9.05  | 9.21  | 9.04  | 8.87  |
| TC1101227 | LOC645630 /// 645630 // hypothetical LOC645630 /// ribosomal      | 4.81E-05 | 2 | 8.20 | 8.57  | 8.49  | 8.71  | 8.85  | 8.83  | 8.83  | 8.73  |
| TC1200387 | LOC645691 /// 645691 // similar to heterogeneous nuclear ribon    | 0.000116 | 2 | 8.04 | 8.24  | 8.09  | 8.31  | 8.46  | 8.53  | 8.55  | 8.31  |
| TC1201582 | LOC646483 /// 646483 // similar to DNA-binding protein TAXREB     | 4.73E-08 | 2 | 5.43 | 5.72  | 5.62  | 5.96  | 6.06  | 6.04  | 6.10  | 5.90  |
| TC1300470 | LOC646520 /// 646520 // hypothetical LOC646520 /// succinate-t    | 0.000314 | 2 | 3.88 | 4.06  | 4.13  | 4.13  | 4.16  | 4.11  | 4.17  | 4.10  |
| TC0400451 | LOC646567 /// 646567 // similar to HSPC307 /// DC2 protein        | 4.24E-09 | 2 | 5.43 | 5.95  | 6.10  | 6.31  | 6.49  | 6.40  | 6.34  | 6.05  |
| TC2000870 | LOC646873 /// 646873 // similar to orthologue of H. sapiens chrc  | 1.43E-09 | 2 | 5.98 | 6.26  | 6.28  | 6.39  | 6.40  | 6.53  | 6.51  | 6.58  |
| TC0100726 | LOC647436 /// 647436 // similar to ribosomal protein L5 /// ribo  | 3.80E-09 | 2 | 7.75 | 8.28  | 7.92  | 8.57  | 8.79  | 8.80  | 8.74  | 8.38  |
| TC1700192 | LOC650788 650788 similar to 40S ribosomal protein S28             | 1.84E-10 | 2 | 7.74 | 8.76  | 8.70  | 8.87  | 8.98  | 9.13  | 9.08  | 8.96  |
| TC1100710 | LOC650788 650788 similar to 40S ribosomal protein S28             | 4.26E-07 | 2 | 7.24 | 7.68  | 7.48  | 8.01  | 8.17  | 8.15  | 8.11  | 7.95  |
| TC0500960 | LOC651789 /// 651789 // similar to poly(A) binding protein intera | 9.23E-06 | 2 | 4.61 | 5.02  | 5.19  | 5.16  | 5.12  | 5.14  | 5.24  | 5.13  |
| TC0200506 | LOC652726 /// 652726 // similar to ankyrin repeat domain 36 ///   | 0.000159 | 2 | 2.70 | 2.82  | 2.60  | 2.67  | 2.96  | 2.95  | 2.96  | 2.81  |
| TC0300173 | LOC653162 /// 653162 // similar to 40S ribosomal protein SA (p4   | 3.14E-06 | 2 | 4.55 | 5.01  | 4.82  | 5.27  | 5.53  | 5.51  | 5.47  | 5.12  |
| TC0301484 | LOC653256 /// 653256 // similar to RAB, member of RAS oncogen     | 7.59E-05 | 2 | 4.73 | 4.94  | 5.11  | 5.35  | 5.33  | 5.26  | 5.26  | 5.07  |
| TC1700413 | LOC653314 /// 653314 // similar to ribosomal protein L19 /// ribo | 3.20E-09 | 2 | 7.62 | 7.95  | 7.79  | 8.17  | 8.18  | 8.25  | 8.34  | 8.21  |
| TC2200680 | LOC653881 /// 653881 // similar to 60S ribosomal protein L3 (L4)  | 0.000273 | 2 | 7.20 | 7.43  | 7.20  | 7.60  | 7.71  | 7.69  | 7.70  | 7.50  |
| TC2100031 | LOC654188 654188 similar to peptidylprolyl isomerase A iso        | 1.10E-11 | 2 | 7.09 | 7.90  | 7.89  | 8.27  | 8.42  | 8.42  | 8.54  | 8.20  |
| TC0700225 | LOC654188 /// 654188 // similar to peptidylprolyl isomerase A iso | 1.81E-12 | 2 | 4.87 | 4.99  | 4.91  | 5.36  | 5.50  | 5.59  | 5.56  | 5.34  |
| TC0201175 | LOC728026 /// 728026 // hypothetical LOC728026 /// prothymos      | 1.92E-16 | 2 | 9.29 | 9.23  | 8.99  | 9.60  | 9.81  | 9.87  | 9.86  | 9.74  |
| TC0301154 | LOC728320 /// 728320 // hypothetical LOC728320 /// lactotransf    | 9.12E-16 | 2 | 5.01 | 8.15  | 6.96  | 7.75  | 8.67  | 8.71  | 7.90  | 7.43  |
| TC0800671 | LOC728358 /// 728358 // defensin, alpha 1 /// Retrocyclin. [Sour  | 3.19E-36 | 2 | 9.04 | 11.55 | 10.98 | 11.80 | 12.01 | 12.10 | 11.89 | 11.76 |
| TC0800673 | LOC728358 /// 728358 // defensin, alpha 1 /// defensin, alpha 3,  | 1.20E-37 | 2 | 9.09 | 11.92 | 11.32 | 12.16 | 12.36 | 12.42 | 12.21 | 12.12 |
| TC1900100 | LOC728688 /// 728688 // ubiquitin-like, containing PHD and RINC   | 0.000463 | 2 | 4.69 | 4.77  | 4.77  | 4.86  | 4.98  | 4.94  | 4.86  | 4.81  |
| TC1101678 | LOC728748 /// 728748 // similar to Protein-kinase, interferon-inc | 1.18E-12 | 2 | 5.42 | 5.61  | 5.70  | 5.94  | 5.88  | 6.07  | 6.20  | 6.04  |
| TC0600677 | LOC729148 /// 729148 // similar to chromosome 6 open reading      | 9.13E-05 | 2 | 3.90 | 4.63  | 4.76  | 4.85  | 4.86  | 4.86  | 4.89  | 4.59  |
| TC1600848 | LOC730038 /// 730038 // hypothetical LOC730038 /// dexametha      | 9.65E-06 | 2 | 4.95 | 4.82  | 4.83  | 5.05  | 5.20  | 5.14  | 5.19  | 5.10  |
| TC1400233 | LOC730432 /// 730432 // similar to serine/threonine/tyrosine int  | 3.02E-05 | 2 | 5.29 | 5.61  | 5.66  | 5.66  | 5.74  | 5.88  | 5.87  | 5.85  |
| TC0201767 | LOC730658 /// 731085 // similar to ankyrin repeat domain 26 ///   | 1.67E-05 | 2 | 3.19 | 3.62  | 3.28  | 3.47  | 3.77  | 3.80  | 3.75  | 3.45  |
| TC1000561 | LOC730792 /// 730792 // hypothetical LOC730792 /// chromosom      | 0.000714 | 2 | 3.24 | 3.46  | 3.40  | 3.52  | 3.58  | 3.56  | 3.65  | 3.64  |
| TC1901825 | LOC731049 /// 731049 // similar to Ubiquitin-conjugating enzym    | 5.15E-06 | 2 | 4.13 | 4.35  | 4.28  | 4.32  | 4.49  | 4.55  | 4.49  | 4.57  |
| TC1500415 | LOC732402 /// 732402 // similar to butyrate-induced transcript 1  | 1.08E-07 | 2 | 3.31 | 3.40  | 3.32  | 3.65  | 3.93  | 3.85  | 3.91  | 3.69  |
| TC0301494 | LOC732448 /// 732448 // hypothetical LOC732448 /// coiled-coil    | 1.21E-05 | 2 | 3.85 | 3.87  | 3.79  | 4.00  | 4.10  | 4.07  | 4.24  | 4.04  |
| TC0401196 | LOC91431 91431 prematurely terminated mRNA decay f                | 3.07E-05 | 2 | 2.60 | 2.54  | 2.62  | 2.71  | 2.90  | 2.76  | 2.82  | 2.70  |



|           |              |                                                 |          |   |       |       |       |       |       |       |       |       |
|-----------|--------------|-------------------------------------------------|----------|---|-------|-------|-------|-------|-------|-------|-------|-------|
| TC0X00524 | LONRF3       | 79836 LON peptidase N-terminal domain and       | 9.42E-12 | 2 | 3.73  | 3.95  | 3.89  | 4.18  | 4.33  | 4.69  | 4.41  | 4.17  |
| TC0401320 | LRBA         | 987 LPS-responsive vesicle trafficking, beac    | 0.000582 | 2 | 3.95  | 4.11  | 3.96  | 4.21  | 4.37  | 4.31  | 4.34  | 4.27  |
| TC0301327 | LRIG1        | 26018 leucine-rich repeats and immunoglobu      | 0.00044  | 2 | 4.42  | 4.40  | 4.39  | 4.52  | 4.61  | 4.59  | 4.58  | 4.53  |
| TC0201473 | LRPPRC       | 10128 leucine-rich PPR-motif containing         | 4.67E-07 | 2 | 3.11  | 3.14  | 3.07  | 3.41  | 3.63  | 3.61  | 3.67  | 3.48  |
| TC0600469 | LRR1         | 55227 leucine rich repeat containing 1 /// Leu  | 0.000688 | 2 | 2.54  | 2.67  | 2.68  | 2.69  | 2.76  | 2.75  | 2.69  | 2.72  |
| TC1500666 | LRR28        | 123355 leucine rich repeat containing 28 /// Le | 9.87E-05 | 2 | 4.24  | 4.53  | 4.51  | 4.60  | 4.61  | 4.69  | 4.74  | 4.56  |
| TC0101803 | LRR47        | 57470 leucine rich repeat containing 47         | 5.05E-08 | 2 | 4.94  | 4.89  | 5.01  | 5.18  | 5.19  | 5.23  | 5.23  | 5.24  |
| TC0301480 | LRR58        | 116064 leucine rich repeat containing 58        | 1.63E-07 | 2 | 4.12  | 4.27  | 4.69  | 4.64  | 4.63  | 4.87  | 4.67  | 4.70  |
| TC0100713 | LRR8D        | 55144 leucine rich repeat containing 8 family,  | 7.58E-06 | 2 | 5.98  | 6.22  | 6.24  | 6.24  | 6.35  | 6.31  | 6.23  | 6.21  |
| TC0102114 | LSM10        | 84967 LSM10, U7 small nuclear RNA associate     | 1.36E-08 | 2 | 5.60  | 5.61  | 5.80  | 5.94  | 5.97  | 5.95  | 5.93  | 6.04  |
| TC1701416 | LSM12        | 124801 LSM12 homolog (S. cerevisiae)            | 3.24E-08 | 2 | 6.16  | 6.60  | 6.63  | 6.85  | 6.78  | 6.78  | 6.76  | 6.69  |
| TC1900416 | LSM14A       | 26065 LSM14A, SCD6 homolog A (S. cerevisiae)    | 4.54E-05 | 2 | 7.98  | 8.08  | 8.10  | 8.15  | 8.16  | 8.21  | 8.22  | 8.27  |
| TC0300073 | LSM3         | 648229 // LSM3 homolog, U6 small nuclear RNA a  | 0.000336 | 2 | 7.38  | 7.87  | 7.80  | 7.68  | 7.67  | 7.91  | 8.03  | 8.07  |
| TC0701112 | LSM5         | 23658 LSM5 homolog, U6 small nuclear RNA a      | 2.90E-08 | 2 | 4.46  | 4.79  | 4.79  | 5.01  | 5.25  | 5.24  | 5.24  | 5.06  |
| TC1201471 | LTA4H        | 4048 leukotriene A4 hydrolase                   | 2.88E-14 | 2 | 7.14  | 7.89  | 7.97  | 8.32  | 8.57  | 8.32  | 8.03  | 7.57  |
| TC0601123 | LTB          | 4050 lymphotoxin beta (TNF superfamily, me      | 0.000124 | 2 | 12.56 | 12.59 | 12.74 | 12.83 | 12.76 | 12.93 | 12.94 | 12.95 |
| TC0200169 | LTBP1        | 4052 latent transforming growth factor beta     | 0.000141 | 2 | 3.77  | 4.33  | 4.01  | 4.52  | 4.88  | 4.79  | 4.50  | 4.41  |
| TC0600778 | LTV1         | 84946 LTV1 homolog (S. cerevisiae)              | 5.33E-05 | 2 | 3.36  | 3.47  | 3.48  | 3.73  | 3.85  | 3.83  | 3.95  | 3.72  |
| TC0800382 | LY96         | 23643 lymphocyte antigen 96                     | 3.08E-09 | 2 | 7.84  | 8.43  | 8.89  | 8.88  | 8.68  | 8.95  | 8.88  | 8.93  |
| TC0501139 | LYSMD3       | 116068 LysM, putative peptidoglycan-binding,    | 7.01E-05 | 2 | 6.00  | 6.43  | 6.57  | 6.48  | 6.25  | 6.54  | 6.59  | 6.61  |
| TC1200506 | LYZ          | 4069 lysozyme (renal amyloidosis)               | 9.65E-13 | 2 | 10.50 | 11.45 | 11.16 | 11.45 | 11.64 | 11.71 | 11.48 | 11.49 |
| TC0101846 | LZIC         | 84328 leucine zipper and CTNNBIP1 domain c      | 5.23E-05 | 2 | 5.93  | 6.44  | 6.51  | 6.49  | 6.49  | 6.54  | 6.59  | 6.50  |
| TC1200946 | M6PR         | 4074 mannose-6-phosphate receptor (cation       | 4.80E-12 | 2 | 6.39  | 6.30  | 6.22  | 6.64  | 6.70  | 6.87  | 7.00  | 6.82  |
| TC0401223 | MAD2L1       | 4085 MAD2 mitotic arrest deficient-like 1 (ye   | 7.96E-06 | 2 | 3.25  | 3.42  | 3.39  | 3.57  | 3.83  | 3.81  | 3.78  | 3.50  |
| TC1200974 | MAGOHB /// M | 55110 mago-nashi homolog B (Drosophila) ///     | 0.000297 | 2 | 3.06  | 3.12  | 3.18  | 3.20  | 3.32  | 3.29  | 3.33  | 3.35  |
| TC0800205 | MAK16        | 84549 MAK16 homolog (S. cerevisiae)             | 4.21E-06 | 2 | 3.81  | 3.74  | 3.86  | 3.92  | 4.02  | 3.99  | 4.11  | 3.98  |
| TC0601568 | MAN1A1       | 4121 mannosidase, alpha, class 1A, member       | 2.71E-12 | 2 | 6.67  | 6.59  | 7.55  | 7.74  | 7.29  | 7.36  | 7.39  | 7.28  |
| TC0600574 | MANEA        | 79694 mannosidase, endo-alpha /// Glycopro      | 9.08E-05 | 2 | 2.67  | 2.88  | 3.02  | 3.00  | 3.22  | 3.22  | 3.12  | 2.98  |
| TC0600863 | MAP3K4       | 4216 mitogen-activated protein kinase kinas     | 0.000903 | 2 | 3.78  | 3.80  | 3.77  | 3.94  | 4.07  | 4.00  | 4.06  | 3.92  |
| TC0201450 | MAP4K3       | 8491 mitogen-activated protein kinase kinas     | 0.000172 | 2 | 2.97  | 3.05  | 3.11  | 3.15  | 3.18  | 3.18  | 3.23  | 3.18  |
| TC0X01287 | MAP7D3       | 79649 MAP7 domain containing 3 /// MAP7 d       | 8.95E-08 | 2 | 3.74  | 4.02  | 4.03  | 4.15  | 4.23  | 4.17  | 4.32  | 4.18  |
| TC0501562 | MAPK9        | 5601 mitogen-activated protein kinase 9         | 1.08E-12 | 2 | 5.02  | 5.12  | 4.95  | 5.50  | 5.62  | 5.59  | 5.66  | 5.54  |
| TC1800138 | MAPRE2       | 10982 microtubule-associated protein, RP/EB     | 3.28E-06 | 2 | 5.77  | 5.62  | 5.70  | 6.14  | 6.02  | 6.16  | 6.18  | 6.20  |
| TC0100504 | MAST2        | 23139 microtubule associated serine/threonir    | 4.08E-05 | 2 | 4.23  | 4.43  | 4.43  | 4.41  | 4.61  | 4.48  | 4.48  | 4.36  |

|           |           |        |                                           |          |   |      |      |      |      |      |      |      |      |
|-----------|-----------|--------|-------------------------------------------|----------|---|------|------|------|------|------|------|------|------|
| TC0500515 | MATR3     | 9782   | matrin 3 /// Matrin-3. [Source:Uniprot]   | 0.000209 | 2 | 6.14 | 6.41 | 6.27 | 6.27 | 6.31 | 6.42 | 6.53 | 6.45 |
| TC1600318 | MAZ       | 4150   | MYC-associated zinc finger protein (pur   | 0.000674 | 2 | 5.51 | 5.49 | 5.53 | 5.61 | 5.68 | 5.60 | 5.53 | 5.52 |
| TC1000064 | MCM10     | 55388  | minichromosome maintenance comple         | 6.13E-05 | 2 | 3.23 | 3.38 | 3.38 | 3.55 | 3.80 | 3.69 | 3.63 | 3.47 |
| TC0601328 | MCM3      | 4172   | minichromosome maintenance comple         | 1.50E-08 | 2 | 3.87 | 3.97 | 3.86 | 4.19 | 4.52 | 4.53 | 4.50 | 4.23 |
| TC0800280 | MCM4      | 4173   | minichromosome maintenance comple         | 1.70E-08 | 2 | 3.61 | 3.85 | 3.74 | 4.02 | 4.35 | 4.30 | 4.23 | 3.95 |
| TC0201958 | MCM6      | 4175   | minichromosome maintenance comple         | 3.12E-14 | 2 | 3.91 | 5.03 | 4.86 | 5.45 | 5.96 | 5.85 | 5.62 | 5.06 |
| TC0800013 | MCPH1     | 79648  | microcephalin 1                           | 3.45E-10 | 2 | 4.07 | 3.98 | 4.08 | 4.27 | 4.29 | 4.31 | 4.53 | 4.45 |
| TC0700412 | MDH2      | 4191   | malate dehydrogenase 2, NAD (mitoch       | 3.65E-06 | 2 | 6.49 | 6.80 | 6.88 | 7.14 | 7.16 | 7.02 | 7.03 | 6.93 |
| TC0601274 | MEA1      | 4201   | male-enhanced antigen 1                   | 1.57E-12 | 2 | 6.00 | 6.19 | 6.45 | 6.68 | 6.67 | 6.59 | 6.67 | 6.58 |
| TC0300713 | MED12L    | 116931 | mediator complex subunit 12-like /// r    | 6.54E-07 | 2 | 3.25 | 3.53 | 3.37 | 3.76 | 3.92 | 3.77 | 3.76 | 3.52 |
| TC1200210 | MED21     | 9412   | mediator complex subunit 21               | 3.27E-08 | 2 | 6.35 | 6.41 | 6.28 | 6.44 | 6.66 | 6.80 | 6.80 | 6.83 |
| TC0400121 | MED28     | 80306  | mediator complex subunit 28               | 4.05E-07 | 2 | 6.65 | 7.08 | 7.15 | 7.17 | 7.06 | 7.26 | 7.23 | 7.33 |
| TC0800517 | MED30     | 90390  | mediator complex subunit 30               | 5.76E-06 | 2 | 5.96 | 6.33 | 6.36 | 6.33 | 6.21 | 6.34 | 6.40 | 6.51 |
| TC0900176 | MELK      | 9833   | maternal embryonic leucine zipper kin     | 1.07E-05 | 2 | 3.25 | 3.34 | 3.31 | 3.49 | 3.75 | 3.65 | 3.57 | 3.45 |
| TC1200599 | METAP2    | 10988  | methionyl aminopeptidase 2 /// Methi      | 7.71E-11 | 2 | 4.24 | 5.10 | 4.86 | 5.56 | 5.85 | 5.88 | 5.89 | 5.43 |
| TC0202084 | METTL5    | 29081  | methyltransferase like 5 /// Methyltr     | 8.77E-11 | 2 | 4.94 | 6.15 | 6.36 | 6.41 | 6.49 | 6.51 | 6.55 | 6.28 |
| TC1500900 | MFAP1     | 4236   | microfibrillar-associated protein 1       | 0.000373 | 2 | 7.63 | 7.87 | 7.77 | 7.84 | 7.71 | 7.89 | 7.94 | 8.01 |
| TC1400208 | MGAT2     | 4247   | mannosyl (alpha-1,6-)-glycoprotein bet    | 4.97E-06 | 2 | 3.98 | 4.10 | 4.39 | 4.37 | 4.43 | 4.44 | 4.43 | 4.43 |
| TC0301532 | MGLL      | 11343  | monoglyceride lipase                      | 1.47E-08 | 2 | 4.14 | 4.27 | 4.26 | 4.43 | 4.56 | 4.57 | 4.46 | 4.38 |
| TC1200171 | MGST1     | 4257   | microsomal glutathione S-transferase 1    | 4.04E-09 | 2 | 3.40 | 3.70 | 3.88 | 4.17 | 4.16 | 4.07 | 3.90 | 3.75 |
| TC1800092 | MIB1      | 57534  | mindbomb homolog 1 (Drosophila)           | 0.000926 | 2 | 5.56 | 5.73 | 5.70 | 5.95 | 5.74 | 5.84 | 5.85 | 5.84 |
| TC1701690 | MIF4GD    | 57409  | MIF4G domain containing /// MIF4G dc      | 0.00083  | 2 | 4.53 | 4.62 | 4.62 | 4.74 | 4.81 | 4.72 | 4.76 | 4.69 |
| TC1001350 | MKI67     | 442448 | // antigen identified by monoclonal antib | 7.88E-09 | 2 | 3.47 | 4.05 | 3.70 | 4.46 | 5.14 | 5.07 | 5.06 | 4.32 |
| TC0201867 | MKI67IP   | 84365  | MKI67 (FHA domain) interacting nuclec     | 6.54E-14 | 2 | 4.13 | 4.27 | 4.09 | 4.83 | 4.98 | 5.01 | 5.26 | 4.99 |
| TC2200775 | MLC1      | 23209  | megalencephalic leukoencephalopathy       | 2.50E-10 | 2 | 4.00 | 4.16 | 4.11 | 4.38 | 4.71 | 4.66 | 4.54 | 4.31 |
| TC0401450 | MLF1IP    | 79682  | MLF1 interacting protein                  | 1.20E-10 | 2 | 2.94 | 3.10 | 2.89 | 3.45 | 3.81 | 3.73 | 3.75 | 3.52 |
| TC1000101 | MLLT10    | 8028   | myeloid/lymphoid or mixed-lineage leu     | 0.000162 | 2 | 5.36 | 5.46 | 5.63 | 5.74 | 5.77 | 5.80 | 5.85 | 5.66 |
| TC1701533 | MMD       | 23531  | monocyte to macrophage differentiat       | 7.92E-05 | 2 | 3.72 | 4.09 | 3.82 | 4.53 | 4.71 | 4.72 | 4.58 | 4.53 |
| TC1400277 | MNAT1     | 4331   | menage a trois homolog 1, cyclin H ass    | 2.68E-08 | 2 | 3.77 | 4.21 | 4.08 | 4.38 | 4.57 | 4.59 | 4.61 | 4.35 |
| TC0400611 | MND1      | 84057  | meiotic nuclear divisions 1 homolog (S.   | 1.31E-09 | 2 | 3.15 | 3.41 | 3.26 | 3.73 | 4.20 | 4.22 | 3.98 | 3.66 |
| TC1000433 | MPHOSPH1  | 9585   | M-phase phosphoprotein 1 /// M-phas       | 9.86E-08 | 2 | 2.95 | 3.12 | 3.16 | 3.38 | 3.57 | 3.51 | 3.57 | 3.39 |
| TC0200335 | MPHOSPH10 | 10199  | M-phase phosphoprotein 10 (U3 small       | 3.74E-07 | 2 | 4.09 | 4.08 | 4.09 | 4.42 | 4.55 | 4.58 | 4.94 | 4.66 |
| TC1201656 | MPHOSPH9  | 10198  | M-phase phosphoprotein 9 /// M-phas       | 2.68E-08 | 2 | 3.38 | 3.43 | 3.40 | 3.69 | 3.88 | 3.87 | 3.95 | 3.75 |
| TC1701550 | MPO       | 4353   | myeloperoxidase /// Myeloperoxidase       | 5.80E-12 | 2 | 4.65 | 5.64 | 5.17 | 6.49 | 7.15 | 6.96 | 6.63 | 5.96 |

|           |            |                                                 |          |   |      |      |      |      |      |      |      |      |
|-----------|------------|-------------------------------------------------|----------|---|------|------|------|------|------|------|------|------|
| TC0400338 | MRPL1      | 65008 mitochondrial ribosomal protein L1 ///    | 8.90E-07 | 2 | 3.89 | 3.96 | 4.08 | 4.26 | 4.46 | 4.47 | 4.58 | 4.47 |
| TC0801217 | MRPL13     | 28998 mitochondrial ribosomal protein L13       | 2.80E-05 | 2 | 3.52 | 4.21 | 4.27 | 4.32 | 4.44 | 4.44 | 4.50 | 4.27 |
| TC0800298 | MRPL15     | 29088 mitochondrial ribosomal protein L15       | 7.97E-05 | 2 | 4.15 | 4.27 | 4.36 | 4.46 | 4.59 | 4.43 | 4.59 | 4.38 |
| TC0600856 | MRPL18     | 29074 mitochondrial ribosomal protein L18       | 6.40E-05 | 2 | 4.73 | 5.05 | 5.11 | 5.26 | 5.28 | 5.29 | 5.33 | 5.18 |
| TC0200369 | MRPL19     | 9801 mitochondrial ribosomal protein L19 //     | 0.000224 | 2 | 3.80 | 3.99 | 4.04 | 4.11 | 4.26 | 4.19 | 4.21 | 4.11 |
| TC1101614 | MRPL21     | 219927 mitochondrial ribosomal protein L21      | 0.000539 | 2 | 4.43 | 4.68 | 4.81 | 4.91 | 4.97 | 4.91 | 4.98 | 4.83 |
| TC0500634 | MRPL22     | 29093 mitochondrial ribosomal protein L22       | 6.82E-05 | 2 | 5.52 | 5.91 | 6.07 | 6.14 | 6.14 | 6.16 | 6.25 | 6.08 |
| TC1701517 | MRPL27     | 51264 mitochondrial ribosomal protein L27       | 2.86E-06 | 2 | 4.46 | 4.38 | 4.45 | 4.65 | 4.83 | 4.75 | 4.84 | 4.74 |
| TC0301568 | MRPL3      | 11222 mitochondrial ribosomal protein L3        | 4.96E-07 | 2 | 3.56 | 3.73 | 3.74 | 4.00 | 4.14 | 4.17 | 4.28 | 4.12 |
| TC0700208 | MRPL32     | 64983 mitochondrial ribosomal protein L32       | 1.94E-09 | 2 | 3.80 | 3.82 | 3.73 | 3.96 | 4.10 | 4.13 | 4.30 | 4.03 |
| TC0200420 | MRPL35     | 51318 mitochondrial ribosomal protein L35       | 7.76E-08 | 2 | 3.99 | 4.32 | 4.55 | 4.76 | 4.89 | 4.82 | 4.88 | 4.72 |
| TC0100574 | MRPL37     | 51253 mitochondrial ribosomal protein L37 //    | 1.16E-06 | 2 | 4.29 | 4.36 | 4.39 | 4.57 | 4.76 | 4.66 | 4.80 | 4.64 |
| TC2100247 | MRPL39     | 54148 mitochondrial ribosomal protein L39       | 2.70E-06 | 2 | 3.96 | 4.63 | 4.57 | 4.83 | 4.89 | 5.00 | 5.01 | 4.87 |
| TC0900729 | MRPL41     | 64975 mitochondrial ribosomal protein L41       | 0.000266 | 2 | 5.64 | 5.70 | 5.79 | 5.99 | 6.02 | 5.90 | 6.02 | 5.84 |
| TC1200584 | MRPL42     | 28977 mitochondrial ribosomal protein L42       | 4.93E-07 | 2 | 5.32 | 5.35 | 5.60 | 5.74 | 5.66 | 5.73 | 5.98 | 5.89 |
| TC0201139 | MRPL44     | 65080 mitochondrial ribosomal protein L44       | 1.73E-07 | 2 | 5.27 | 5.27 | 5.37 | 5.60 | 5.51 | 5.60 | 5.67 | 5.82 |
| TC1501219 | MRPL46     | 26589 mitochondrial ribosomal protein L46       | 0.00039  | 2 | 3.98 | 3.91 | 4.01 | 4.11 | 4.19 | 4.23 | 4.30 | 4.22 |
| TC1100657 | MRPL48     | 51642 mitochondrial ribosomal protein L48 //    | 1.19E-05 | 2 | 4.33 | 4.35 | 4.37 | 4.54 | 4.62 | 4.55 | 4.62 | 4.59 |
| TC0901199 | MRPL50     | 54534 mitochondrial ribosomal protein L50       | 5.55E-07 | 2 | 3.08 | 3.19 | 3.10 | 3.38 | 3.47 | 3.63 | 3.63 | 3.45 |
| TC1200903 | MRPL51     | 51258 mitochondrial ribosomal protein L51       | 9.63E-10 | 2 | 5.38 | 5.82 | 5.97 | 6.02 | 6.11 | 6.03 | 5.94 | 5.79 |
| TC1900080 | MRPL54     | 116541 mitochondrial ribosomal protein L54      | 0.000556 | 2 | 5.71 | 6.29 | 6.15 | 6.09 | 6.34 | 6.39 | 6.40 | 6.35 |
| TC0102753 | MRPL9      | 65005 mitochondrial ribosomal protein L9 ///    | 1.95E-06 | 2 | 3.62 | 3.79 | 3.66 | 3.95 | 4.14 | 4.01 | 4.07 | 3.96 |
| TC1500599 | MRPS11     | 64963 mitochondrial ribosomal protein S11       | 4.06E-05 | 2 | 4.59 | 4.72 | 4.90 | 4.91 | 4.99 | 4.89 | 4.93 | 4.94 |
| TC0103020 | MRPS14     | 63931 mitochondrial ribosomal protein S14       | 1.49E-08 | 2 | 4.72 | 4.76 | 4.84 | 4.93 | 5.05 | 5.09 | 5.15 | 5.06 |
| TC1001065 | MRPS16 /// | DN 51021 mitochondrial ribosomal protein S16 // | 3.14E-11 | 2 | 4.58 | 4.86 | 4.81 | 5.12 | 5.28 | 5.29 | 5.30 | 5.11 |
| TC0601289 | MRPS18A    | 55168 mitochondrial ribosomal protein S18A ,    | 2.11E-05 | 2 | 5.81 | 6.21 | 6.23 | 6.37 | 6.37 | 6.34 | 6.38 | 6.37 |
| TC0600248 | MRPS18B    | 28973 mitochondrial ribosomal protein S18B ,    | 0.00042  | 2 | 4.32 | 4.66 | 4.57 | 4.64 | 4.64 | 4.72 | 4.64 | 4.62 |
| TC0400362 | MRPS18C    | 51023 mitochondrial ribosomal protein S18C      | 8.63E-15 | 2 | 5.62 | 6.45 | 6.79 | 6.87 | 6.76 | 6.84 | 6.90 | 6.79 |
| TC0101013 | MRPS21 /// | Q9 54460 mitochondrial ribosomal protein S21    | 1.87E-06 | 2 | 4.47 | 4.54 | 4.66 | 4.88 | 5.00 | 4.90 | 5.03 | 4.80 |
| TC1701543 | MRPS23     | 51649 mitochondrial ribosomal protein S23       | 9.50E-14 | 2 | 4.28 | 4.53 | 4.78 | 5.32 | 5.44 | 5.52 | 5.61 | 5.39 |
| TC0501053 | MRPS27     | 23107 mitochondrial ribosomal protein S27       | 4.98E-06 | 2 | 3.67 | 3.85 | 3.81 | 3.85 | 4.10 | 4.01 | 4.05 | 3.92 |
| TC0801054 | MRPS28     | 28957 mitochondrial ribosomal protein S28       | 2.90E-10 | 2 | 4.28 | 4.64 | 4.94 | 5.02 | 4.92 | 4.89 | 4.89 | 4.81 |
| TC0500164 | MRPS30     | 10884 mitochondrial ribosomal protein S30       | 4.43E-08 | 2 | 3.35 | 3.54 | 3.54 | 3.74 | 3.80 | 3.79 | 4.01 | 3.82 |
| TC0701690 | MRPS33     | 51650 mitochondrial ribosomal protein S33       | 1.64E-06 | 2 | 5.22 | 5.39 | 5.47 | 5.64 | 5.79 | 5.81 | 5.80 | 5.65 |

|           |            |                                                 |                           |              |          |      |      |      |      |      |      |      |      |      |
|-----------|------------|-------------------------------------------------|---------------------------|--------------|----------|------|------|------|------|------|------|------|------|------|
| TC1200217 | MRPS35     | 60488 mitochondrial ribosomal protein S35 //    | 5.05E-06                  | 2            | 3.76     | 3.85 | 3.89 | 4.14 | 4.21 | 4.27 | 4.13 | 4.08 |      |      |
| TC0500234 | MRPS36     | 92259 mitochondrial ribosomal protein S36       | 3.97E-09                  | 2            | 5.20     | 5.70 | 5.73 | 5.84 | 5.93 | 5.88 | 5.98 | 5.92 |      |      |
| TC0201737 | MRPS5      | 64969 mitochondrial ribosomal protein S5 ///    | 0.000203                  | 2            | 5.25     | 5.58 | 5.58 | 5.79 | 5.80 | 5.86 | 5.88 | 5.64 |      |      |
| TC1700755 | MRPS7      | 51081 mitochondrial ribosomal protein S7        | 7.12E-07                  | 2            | 4.64     | 4.91 | 4.83 | 5.09 | 5.18 | 5.06 | 5.11 | 4.95 |      |      |
| TC1100431 | MS4A3      | 932 membrane-spanning 4-domains, subfa          | 1.50E-20                  | 2            | 4.03     | 6.25 | 5.12 | 7.20 | 8.11 | 8.29 | 7.69 | 6.86 |      |      |
| TC0200228 | MSH2       | 4436 mutS homolog 2, colon cancer, nonpol       | 2.20E-11                  | 2            | 3.45     | 3.22 | 3.30 | 3.59 | 3.83 | 3.83 | 3.95 | 3.82 |      |      |
| TC1200488 | MSRB3      | 253827 methionine sulfoxide reductase B3        | 1.39E-06                  | 2            | 4.25     | 4.95 | 5.07 | 4.98 | 5.23 | 5.23 | 5.24 | 4.99 |      |      |
| TC1600460 | MT1F       | 4494 metallothionein 1F                         | 4.11E-07                  | 2            | 5.08     | 5.30 | 5.35 | 5.73 | 5.81 | 5.84 | 6.07 | 5.73 |      |      |
| TC1600462 | MT1X       | 4501 metallothionein 1X                         | 0.000769                  | 2            | 5.70     | 5.76 | 5.64 | 5.97 | 5.88 | 6.04 | 6.16 | 6.10 |      |      |
| TC1101360 | MTCH2      | 23788 mitochondrial carrier homolog 2 (C. ele   | 3.31E-07                  | 2            | 4.45     | 5.15 | 5.08 | 5.31 | 5.54 | 5.45 | 5.46 | 5.20 |      |      |
| TC1400295 | MTHFD1     | 4522 methylenetetrahydrofolate dehydroge        | 1.29E-05                  | 2            | 3.67     | 3.73 | 3.66 | 3.79 | 3.99 | 4.01 | 3.99 | 3.84 |      |      |
| TC0201523 | MTIF2      | 4528 mitochondrial translational initiation fa  | 2.74E-05                  | 2            | 4.84     | 5.07 | 5.09 | 5.18 | 5.27 | 5.40 | 5.62 | 5.39 |      |      |
| TC1101612 | MTL5       | 9633 metallothionein-like 5, testis-specific (t | 0.000195                  | 2            | 3.85     | 4.02 | 4.09 | 4.02 | 4.16 | 4.14 | 4.13 | 4.05 |      |      |
| TC0600741 | MYB        | 4602 v-myb myeloblastosis viral oncogene h      | 3.48E-12                  | 2            | 4.81     | 5.20 | 5.22 | 5.73 | 6.03 | 6.13 | 6.00 | 5.86 |      |      |
| TC2000288 | MYBL2      | 4605 v-myb myeloblastosis viral oncogene h      | 0.000111                  | 2            | 4.23     | 4.33 | 4.28 | 4.40 | 4.55 | 4.52 | 4.44 | 4.34 |      |      |
| TC2000235 | MYL9       | 10398 myosin, light chain 9, regulatory         | 0.00052                   | 2            | 5.35     | 5.71 | 5.65 | 6.31 | 6.71 | 6.66 | 6.27 | 6.26 |      |      |
| TC1701187 | MYO18A /// | TI, 399687 // myosin XVIII A ///                | TGFB1-induced anti-a      | 2.12E-05     | 2        | 5.12 | 5.10 | 5.26 | 5.52 | 5.31 | 5.20 | 5.32 | 5.26 |      |
| TC1501080 | MYO9A      | 4649 myosin IXA ///                             | myosin IXA [Source:RefS   | 0.000604     | 2        | 3.21 | 3.25 | 3.31 | 3.34 | 3.33 | 3.32 | 3.42 | 3.35 |      |
| TC1300322 | N6AMT2     | 221143 N-6 adenine-specific DNA methyltransf    | 0.000441                  | 2            | 4.26     | 4.23 | 4.34 | 4.43 | 4.56 | 4.51 | 4.57 | 4.45 |      |      |
| TC1201306 | NACA       | 4666 nascent polypeptide-associated compl       | 1.16E-07                  | 2            | 5.68     | 5.87 | 5.98 | 6.04 | 6.06 | 5.96 | 6.02 | 5.91 |      |      |
| TC0400655 | NACA3P     | 389240 NACA family member 3 pseudogene          | 0.000379                  | 2            | 2.62     | 3.05 | 3.30 | 3.29 | 3.18 | 3.22 | 3.27 | 3.22 |      |      |
| TC1601162 | NAE1       | 8883 NEDD8 activating enzyme E1 subunit 1       | 5.14E-06                  | 2            | 3.69     | 3.69 | 3.78 | 3.95 | 4.01 | 3.98 | 4.11 | 3.98 |      |      |
| TC0201324 | NAG        | 51594 neuroblastoma-amplified protein           | 7.76E-05                  | 2            | 3.53     | 3.73 | 3.76 | 3.85 | 3.98 | 3.91 | 3.88 | 3.77 |      |      |
| TC1201404 | NAP1L1     | 4673 nucleosome assembly protein 1-like 1       | 3.64E-23                  | 2            | 6.89     | 6.87 | 6.50 | 8.15 | 8.41 | 8.55 | 8.48 | 8.25 |      |      |
| TC0701517 | NAPEPLD    | 222236 N-acyl phosphatidylethanolamine phos     | 0.000367                  | 2            | 3.18     | 3.25 | 3.37 | 3.44 | 3.44 | 3.39 | 3.50 | 3.48 |      |      |
| TC0400552 | NARG1      | 80155 NMDA receptor regulated 1                 | 1.87E-08                  | 2            | 3.54     | 3.83 | 3.70 | 4.02 | 4.29 | 4.25 | 4.31 | 4.06 |      |      |
| TC1501010 | NARG2      | 79664 NMDA receptor regulated 2                 | 8.48E-08                  | 2            | 3.39     | 3.48 | 3.52 | 3.80 | 3.96 | 3.93 | 4.12 | 3.97 |      |      |
| TC0800112 | NAT1       | 9 N-acetyltransferase 1 (arylamine N-ace        | 2.36E-05                  | 2            | 3.54     | 3.61 | 3.75 | 3.72 | 3.68 | 3.70 | 3.91 | 3.87 |      |      |
| TC0301227 | NAT6 ///   | IFRD2 24142 ///                                 | N-acetyltransferase 6 /// | hyaluronoglu | 2.55E-05 | 2    | 4.69 | 4.68 | 4.64 | 4.74 | 4.81 | 4.83 | 4.71 | 4.71 |
| TC1200053 | NCAPD2     | 9918 non-SMC condensin I complex, subunit       | 2.30E-06                  | 2            | 4.90     | 5.51 | 5.33 | 5.43 | 5.65 | 5.55 | 5.52 | 5.25 |      |      |
| TC1101993 | NCAPD3     | 23310 non-SMC condensin II complex, subuni      | 8.14E-08                  | 2            | 3.98     | 3.94 | 3.90 | 4.15 | 4.39 | 4.42 | 4.40 | 4.26 |      |      |
| TC0400122 | NCAPG      | 64151 non-SMC condensin I complex, subunit      | 2.06E-06                  | 2            | 2.61     | 2.77 | 2.70 | 3.06 | 3.48 | 3.42 | 3.25 | 3.00 |      |      |
| TC0701805 | NCAPG2     | 54892 non-SMC condensin II complex, subuni      | 0.000211                  | 2            | 2.94     | 3.01 | 2.92 | 3.09 | 3.37 | 3.29 | 3.32 | 3.15 |      |      |
| TC0200492 | NCAPH      | 23397 non-SMC condensin I complex, subunit      | 2.29E-05                  | 2            | 3.50     | 3.65 | 3.62 | 3.82 | 4.06 | 3.98 | 3.92 | 3.71 |      |      |

|           |               |        |                                           |          |   |      |      |      |      |      |       |       |       |
|-----------|---------------|--------|-------------------------------------------|----------|---|------|------|------|------|------|-------|-------|-------|
| TC0900422 | NCBP1         | 4686   | nuclear cap binding protein subunit 1, i  | 1.61E-05 | 2 | 4.75 | 4.62 | 4.70 | 4.89 | 4.99 | 5.01  | 5.09  | 4.94  |
| TC0300646 | NCK1          | 4690   | NCK adaptor protein 1                     | 1.03E-06 | 2 | 5.69 | 5.99 | 5.95 | 6.04 | 6.05 | 6.01  | 6.00  | 5.95  |
| TC0M00032 | ND6           | 4541   | NADH dehydrogenase, subunit 6 (com        | 0.000352 | 2 | 9.64 | 9.88 | 9.93 | 9.79 | 9.98 | 10.17 | 10.21 | 10.26 |
| TC2000715 | NDRG3 /// HNF | 57446  | NDRG family member 3 /// Protein NDI      | 3.49E-06 | 2 | 6.21 | 6.01 | 6.30 | 6.59 | 6.42 | 6.33  | 6.33  | 6.39  |
| TC1901079 | NDUFA11 /// C | 126328 | NADH dehydrogenase (ubiquinone) 1 a       | 1.03E-05 | 2 | 4.47 | 4.71 | 4.77 | 4.88 | 4.97 | 4.88  | 4.72  | 4.74  |
| TC1201461 | NDUFA12       | 55967  | NADH dehydrogenase (ubiquinone) 1 a       | 3.56E-09 | 2 | 5.21 | 6.15 | 6.29 | 6.42 | 6.55 | 6.57  | 6.75  | 6.51  |
| TC1900339 | NDUFA13       | 51079  | NADH dehydrogenase (ubiquinone) 1 a       | 5.13E-06 | 2 | 5.99 | 6.47 | 6.60 | 6.82 | 6.82 | 6.69  | 6.65  | 6.52  |
| TC0501351 | NDUFA2        | 4695   | NADH dehydrogenase (ubiquinone) 1 a       | 2.26E-06 | 2 | 7.20 | 7.44 | 7.56 | 7.70 | 7.65 | 7.69  | 7.65  | 7.72  |
| TC2200718 | NDUFA6        | 4700   | NADH dehydrogenase (ubiquinone) 1 a       | 1.60E-08 | 2 | 6.46 | 6.91 | 7.01 | 7.24 | 7.35 | 7.40  | 7.39  | 7.29  |
| TC1901124 | NDUFA7        | 4701   | NADH dehydrogenase (ubiquinone) 1 a       | 2.83E-05 | 2 | 4.19 | 4.45 | 4.54 | 4.68 | 4.58 | 4.54  | 4.68  | 4.49  |
| TC1600942 | NDUFAB1       | 4706   | NADH dehydrogenase (ubiquinone) 1, i      | 2.52E-10 | 2 | 5.02 | 5.79 | 5.92 | 6.23 | 6.48 | 6.44  | 6.60  | 6.20  |
| TC1401079 | NDUFB1        | 4707   | NADH dehydrogenase (ubiquinone) 1 b       | 5.52E-09 | 2 | 8.63 | 8.80 | 9.00 | 9.02 | 9.02 | 8.96  | 8.95  | 8.97  |
| TC1600063 | NDUFB10       | 4716   | NADH dehydrogenase (ubiquinone) 1 b       | 1.37E-13 | 2 | 5.54 | 5.94 | 5.98 | 6.26 | 6.31 | 6.18  | 6.28  | 6.15  |
| TC0X00883 | NDUFB11       | 54539  | NADH dehydrogenase (ubiquinone) 1 b       | 3.48E-06 | 2 | 5.78 | 6.17 | 6.20 | 6.33 | 6.36 | 6.22  | 6.29  | 6.15  |
| TC0700750 | NDUFB2        | 4708   | NADH dehydrogenase (ubiquinone) 1 b       | 1.14E-06 | 2 | 4.68 | 4.73 | 4.67 | 4.90 | 5.11 | 5.07  | 5.00  | 4.88  |
| TC0300821 | NDUFB5        | 4711   | NADH dehydrogenase (ubiquinone) 1 b       | 2.99E-10 | 2 | 4.40 | 4.92 | 5.15 | 5.25 | 5.18 | 5.28  | 5.38  | 5.29  |
| TC0900846 | NDUFB6        | 4712   | NADH dehydrogenase (ubiquinone) 1 b       | 4.81E-11 | 2 | 6.43 | 6.34 | 6.56 | 6.90 | 6.86 | 7.10  | 7.10  | 7.10  |
| TC1901244 | NDUFB7        | 4713   | NADH dehydrogenase (ubiquinone) 1 b       | 2.20E-10 | 2 | 6.04 | 6.47 | 6.73 | 6.98 | 7.04 | 6.74  | 6.67  | 6.45  |
| TC0500017 | NDUFS6        | 4726   | NADH dehydrogenase (ubiquinone) Fe-       | 3.49E-08 | 2 | 5.67 | 5.97 | 6.11 | 6.24 | 6.28 | 6.29  | 6.36  | 6.22  |
| TC2100156 | NDUFV3        | 4731   | NADH dehydrogenase (ubiquinone) fla       | 5.40E-07 | 2 | 5.32 | 5.48 | 5.53 | 5.78 | 5.85 | 5.88  | 5.96  | 5.85  |
| TC0400693 | NEIL3         | 55247  | nei endonuclease VIII-like 3 (E. coli)    | 6.71E-07 | 2 | 3.76 | 4.18 | 4.27 | 4.45 | 4.61 | 4.54  | 4.44  | 4.28  |
| TC0103208 | NEK2          | 4751   | NIMA (never in mitosis gene a)-related    | 7.55E-05 | 2 | 3.43 | 3.43 | 3.43 | 3.52 | 3.84 | 3.77  | 3.71  | 3.57  |
| TC0301261 | NEK4          | 6787   | NIMA (never in mitosis gene a)-related    | 0.000824 | 2 | 5.31 | 5.41 | 5.38 | 5.55 | 5.55 | 5.52  | 5.63  | 5.58  |
| TC0101501 | NENF          | 29937  | neuron derived neurotrophic factor        | 3.49E-07 | 2 | 5.37 | 5.88 | 5.99 | 5.88 | 6.09 | 6.07  | 6.00  | 5.94  |
| TC1000030 | NET1          | 10276  | neuroepithelial cell transforming gene    | 1.19E-06 | 2 | 4.21 | 4.52 | 4.42 | 4.55 | 4.72 | 4.66  | 4.70  | 4.60  |
| TC0100673 | NEXN          | 91624  | nexilin (F actin binding protein) /// nex | 3.11E-05 | 2 | 3.50 | 4.03 | 3.87 | 4.69 | 4.67 | 4.78  | 4.80  | 4.73  |
| TC1000597 | NHLRC2        | 374354 | NHL repeat containing 2                   | 0.0003   | 2 | 4.27 | 4.82 | 4.71 | 4.82 | 4.91 | 4.98  | 4.93  | 4.83  |
| TC2200710 | NHP2L1        | 4809   | NHP2 non-histone chromosome protei        | 2.24E-13 | 2 | 5.44 | 5.59 | 5.56 | 5.90 | 6.10 | 6.24  | 6.28  | 6.07  |
| TC1600554 | NIP7          | 51388  | nuclear import 7 homolog (S. cerevisiae)  | 7.90E-09 | 2 | 5.05 | 5.29 | 5.37 | 5.63 | 5.53 | 5.52  | 5.60  | 5.52  |
| TC0900454 | NIPSNAP3A     | 25934  | nipsnap homolog 3A (C. elegans)           | 1.36E-06 | 2 | 3.53 | 4.07 | 4.12 | 4.20 | 4.37 | 4.40  | 4.34  | 4.17  |
| TC0300443 | NIT2          | 56954  | nitrilase family, member 2                | 5.09E-08 | 2 | 3.76 | 4.04 | 3.87 | 4.31 | 4.69 | 4.66  | 4.50  | 4.26  |
| TC0301061 | NKIRAS1       | 28512  | NFKB inhibitor interacting Ras-like 1     | 5.66E-05 | 2 | 4.65 | 5.02 | 5.00 | 5.08 | 5.10 | 5.02  | 5.05  | 5.07  |
| TC1200658 | NM_207376     | ---    | ---                                       | 3.25E-06 | 2 | 3.60 | 3.57 | 3.64 | 4.41 | 4.75 | 4.64  | 4.41  | 4.33  |
| TC0300762 | NMD3          | 51068  | NMD3 homolog (S. cerevisiae)              | 1.24E-05 | 2 | 3.99 | 4.70 | 4.59 | 4.53 | 4.87 | 4.89  | 4.77  | 4.59  |

|           |             |                |                                                     |          |   |      |       |       |       |       |       |       |       |
|-----------|-------------|----------------|-----------------------------------------------------|----------|---|------|-------|-------|-------|-------|-------|-------|-------|
| TC0500160 | NNT         | 23530          | nicotinamide nucleotide transhydrogenase            | 3.12E-08 | 2 | 4.31 | 4.69  | 4.82  | 5.13  | 5.22  | 5.15  | 5.15  | 4.87  |
| TC0400780 | NOL14       | 8602           | nucleolar protein 14                                | 3.94E-05 | 2 | 4.28 | 4.26  | 4.26  | 4.33  | 4.43  | 4.38  | 4.53  | 4.35  |
| TC0400456 | NOLA1       | 54433          | nucleolar protein family A, member 1 (              | 0.00012  | 2 | 4.92 | 4.94  | 4.93  | 5.06  | 5.09  | 5.11  | 5.19  | 5.15  |
| TC0501539 | NOLA2       | 55651          | nucleolar protein family A, member 2 (              | 2.39E-06 | 2 | 4.77 | 5.02  | 4.99  | 5.29  | 5.44  | 5.46  | 5.44  | 5.10  |
| TC1500807 | NOLA3       | 55505          | nucleolar protein family A, member 3 (              | 2.25E-06 | 2 | 9.97 | 10.38 | 10.42 | 10.67 | 10.55 | 10.58 | 10.51 | 10.49 |
| TC1000533 | NOLC1       | 9221           | nucleolar and coiled-body phosphoprotein            | 5.59E-08 | 2 | 4.18 | 4.28  | 3.96  | 4.40  | 4.52  | 4.57  | 4.81  | 4.62  |
| TC0201009 | NOP5/NOP58  | 51602          | nucleolar protein NOP5/NOP58                        | 5.39E-07 | 2 | 3.50 | 3.64  | 3.48  | 3.84  | 4.02  | 3.99  | 4.11  | 3.88  |
| TC1400030 | NP          | 4860           | nucleoside phosphorylase                            | 3.44E-05 | 2 | 4.42 | 4.71  | 4.73  | 4.86  | 5.24  | 5.02  | 4.92  | 4.67  |
| TC0801144 | NPAL2       | 79815          | NIPA-like domain containing 2                       | 0.00015  | 2 | 3.49 | 3.90  | 4.12  | 4.02  | 4.22  | 4.25  | 4.30  | 4.26  |
| TC0100264 | NPAL3       | 57185          | NIPA-like domain containing 3 /// NIPA              | 3.16E-05 | 2 | 3.74 | 3.72  | 3.75  | 3.78  | 3.94  | 3.84  | 3.91  | 3.82  |
| TC0500702 | NPM1        | 4869           | nucleophosmin (nucleolar phosphoprotein)            | 6.64E-08 | 2 | 6.55 | 7.14  | 6.89  | 7.21  | 7.42  | 7.51  | 7.48  | 7.20  |
| TC1300055 | NR_002162.1 | ---            | ATP synthase, H+ transporting, mitochondrial        | 2.89E-15 | 2 | 7.66 | 8.31  | 8.58  | 8.62  | 8.57  | 8.56  | 8.56  | 8.49  |
| TC1100965 | NRGN        | 4900           | neurogranin (protein kinase C substrate)            | 0.000385 | 2 | 5.34 | 5.84  | 5.62  | 6.23  | 6.51  | 6.45  | 6.22  | 6.18  |
| TC2100224 | NRIP1       | 8204           | nuclear receptor interacting protein 1              | 6.06E-10 | 2 | 4.47 | 5.88  | 5.75  | 5.92  | 6.14  | 6.07  | 5.99  | 5.66  |
| TC0103218 | NSL1        | 25936          | NSL1, MIND kinetochore complex component            | 1.14E-05 | 2 | 5.52 | 5.63  | 5.65  | 5.83  | 5.82  | 5.80  | 5.95  | 5.92  |
| TC1001322 | NSMCE4A     | 54780          | non-SMC element 4 homolog A (S. cerevisiae)         | 0.000238 | 2 | 3.87 | 4.02  | 4.03  | 4.03  | 4.24  | 4.13  | 4.22  | 4.01  |
| TC0701313 | NSUN5       | 55695          | NOL1/NOP2/Sun domain family, member 5               | 3.04E-08 | 2 | 5.96 | 5.85  | 5.93  | 6.13  | 6.25  | 6.21  | 6.20  | 6.02  |
| TC0701118 | NT5C3       | 51251          | 5'-nucleotidase, cytosolic III                      | 2.75E-07 | 2 | 6.69 | 7.36  | 7.60  | 7.47  | 7.38  | 7.62  | 7.72  | 7.73  |
| TC1600884 | NTAN1       | 123803         | N-terminal asparagine amidase                       | 2.33E-08 | 2 | 5.85 | 6.40  | 6.51  | 6.66  | 6.48  | 6.54  | 6.67  | 6.69  |
| TC1600170 | NUBP1       | 4682           | nucleotide binding protein 1 (MinD homolog)         | 2.05E-10 | 2 | 4.99 | 5.31  | 5.15  | 5.57  | 5.62  | 5.62  | 5.75  | 5.62  |
| TC1100203 | NUCB2       | 4925           | nucleobindin 2                                      | 4.08E-14 | 2 | 5.41 | 6.24  | 6.20  | 6.47  | 6.73  | 6.77  | 6.71  | 6.43  |
| TC0103168 | NUCKS1      | 64710          | nuclear casein kinase and cyclin-dependent kinase   | 1.22E-11 | 2 | 5.33 | 6.54  | 6.36  | 6.52  | 6.78  | 6.78  | 6.88  | 6.48  |
| TC1601117 | NUDT21      | 11051          | nudix (nucleoside diphosphate linked nucleoside)    | 4.34E-06 | 2 | 6.55 | 6.79  | 7.08  | 7.17  | 7.11  | 7.26  | 7.32  | 7.25  |
| TC0601195 | NUDT3       | /// RPS 732348 | // nudix (nucleoside diphosphate linked nucleoside) | 1.17E-07 | 2 | 6.85 | 6.72  | 6.84  | 7.10  | 7.06  | 7.04  | 7.13  | 7.07  |
| TC1200583 | NUDT4       | 11163          | nudix (nucleoside diphosphate linked nucleoside)    | 1.87E-15 | 2 | 4.85 | 5.11  | 5.25  | 5.46  | 5.54  | 5.54  | 5.49  | 5.41  |
| TC0101236 | NUF2        | 83540          | NUF2, NDC80 kinetochore complex component           | 0.000238 | 2 | 2.60 | 2.77  | 2.77  | 2.95  | 3.27  | 3.19  | 3.09  | 2.94  |
| TC1300445 | NUFIP1      | 26747          | nuclear fragile X mental retardation protein        | 0.000542 | 2 | 3.56 | 3.73  | 3.69  | 3.86  | 3.83  | 3.85  | 3.90  | 3.80  |
| TC0900611 | NUP188      | 23511          | nucleoporin 188kDa /// nucleoporin 188              | 9.22E-06 | 2 | 4.22 | 4.24  | 4.18  | 4.34  | 4.53  | 4.47  | 4.59  | 4.38  |
| TC0700726 | NUP205      | 23165          | nucleoporin 205kDa                                  | 0.000329 | 2 | 3.56 | 3.61  | 3.54  | 3.73  | 3.88  | 3.84  | 3.94  | 3.80  |
| TC0301025 | NUP210      | 23225          | nucleoporin 210kDa                                  | 7.25E-05 | 2 | 4.59 | 4.54  | 4.52  | 4.60  | 4.76  | 4.73  | 4.80  | 4.66  |
| TC0200917 | NUP35       | 129401         | nucleoporin 35kDa /// Nucleoporin NUP35             | 6.93E-05 | 2 | 2.87 | 2.88  | 2.93  | 2.91  | 3.06  | 2.94  | 3.04  | 3.03  |
| TC1201504 | NUP37       | 79023          | nucleoporin 37kDa                                   | 8.65E-06 | 2 | 4.30 | 4.49  | 4.81  | 4.86  | 4.89  | 4.96  | 4.97  | 4.93  |
| TC0601676 | NUP43       | 348995         | nucleoporin 43kDa /// Nucleoporin NUP43             | 0.000611 | 2 | 3.26 | 3.42  | 3.65  | 3.67  | 3.71  | 3.73  | 3.86  | 3.73  |
| TC0401058 | NUP54       | 53371          | nucleoporin 54kDa /// Nucleoporin p54               | 9.98E-05 | 2 | 4.09 | 4.10  | 4.14  | 4.31  | 4.30  | 4.32  | 4.45  | 4.36  |

|            |                                                                 |        |                                           |          |   |      |      |      |      |       |      |      |      |
|------------|-----------------------------------------------------------------|--------|-------------------------------------------|----------|---|------|------|------|------|-------|------|------|------|
| TC1700954  | NUP88                                                           | 4927   | nucleoporin 88kDa                         | 4.08E-08 | 2 | 4.35 | 4.28 | 4.25 | 4.46 | 4.63  | 4.59 | 4.73 | 4.62 |
| TC0700112  | NUPL2                                                           | 11097  | nucleoporin like 2 /// Nucleoporin-like   | 0.000496 | 2 | 3.60 | 3.73 | 3.74 | 3.80 | 3.88  | 3.82 | 3.92 | 3.85 |
| TC1500253  | NUSAP1                                                          | 51203  | nucleolar and spindle associated protei   | 1.37E-13 | 2 | 4.34 | 5.04 | 5.02 | 5.70 | 6.17  | 6.05 | 5.84 | 5.50 |
| TC1600530  | NUTF2                                                           | 731535 | // nuclear transport factor 2             | 8.52E-11 | 2 | 5.89 | 5.59 | 5.65 | 6.25 | 6.48  | 6.39 | 6.36 | 6.26 |
| TC0103274  | NVL                                                             | 4931   | nuclear VCP-like /// Nuclear valosin-coi  | 2.58E-05 | 2 | 3.89 | 3.92 | 3.88 | 4.08 | 4.15  | 4.17 | 4.33 | 4.17 |
| TC1600931  | O75704_HUM/---                                                  |        | RRN3 RNA polymerase I transcription f     | 0.000293 | 2 | 2.80 | 2.72 | 2.76 | 2.83 | 2.95  | 2.84 | 2.88 | 2.89 |
| TC0500290  | O95036_HUM/---                                                  |        | ---                                       | 8.37E-10 | 2 | 5.99 | 6.92 | 6.85 | 7.20 | 7.26  | 7.39 | 7.28 | 7.10 |
| TC1200427  | OBFC2B                                                          | 79035  | oligonucleotide/oligosaccharide-bindin    | 0.000259 | 2 | 5.02 | 5.12 | 5.14 | 5.20 | 5.33  | 5.32 | 5.37 | 5.20 |
| TC1900294  | OCEL1                                                           | 79629  | occludin/ELL domain containing 1          | 0.000453 | 2 | 5.27 | 5.30 | 5.26 | 5.54 | 5.47  | 5.46 | 5.47 | 5.43 |
| TC0900599  | ODF2                                                            | 4957   | outer dense fiber of sperm tails 2 /// ol | 2.80E-07 | 2 | 4.88 | 4.92 | 4.83 | 4.95 | 5.04  | 5.02 | 5.14 | 5.01 |
| TC0202106  | OLA1                                                            | 29789  | Obg-like ATPase 1 /// Putative GTP-bin    | 1.20E-06 | 2 | 4.07 | 4.60 | 4.58 | 4.70 | 4.86  | 4.82 | 4.80 | 4.60 |
| TC1901152  | OLFM2                                                           | 93145  | olfactomedin 2                            | 0.000616 | 2 | 4.69 | 4.77 | 4.80 | 4.92 | 4.86  | 4.88 | 4.88 | 4.91 |
| TC1200968  | OLR1                                                            | 4973   | oxidized low density lipoprotein (lectin  | 5.22E-13 | 2 | 3.59 | 5.49 | 4.03 | 5.14 | 6.36  | 6.58 | 5.88 | 5.03 |
| TC0102296  | OMA1                                                            | 115209 | OMA1 homolog, zinc metallopeptidase       | 1.71E-06 | 2 | 5.74 | 5.63 | 5.88 | 5.98 | 5.93  | 6.05 | 6.03 | 6.08 |
| TC1600350  | ORAI3 /// FBXL 93129 /// ORAI calcium release-activated calcium |        |                                           | 1.62E-05 | 2 | 5.04 | 5.02 | 4.98 | 5.10 | 5.14  | 5.13 | 5.12 | 5.11 |
| TC0102257  | ORC1L                                                           | 4998   | origin recognition complex, subunit 1-li  | 1.31E-05 | 2 | 3.16 | 3.28 | 3.24 | 3.38 | 3.57  | 3.50 | 3.56 | 3.35 |
| TC0201990  | ORC4L                                                           | 5000   | origin recognition complex, subunit 4-li  | 3.32E-05 | 2 | 5.13 | 5.16 | 5.46 | 5.48 | 5.29  | 5.41 | 5.41 | 5.40 |
| TC0601506  | OSTM1                                                           | 28962  | osteopetrosis associated transmembra      | 2.27E-07 | 2 | 6.18 | 6.23 | 6.33 | 6.53 | 6.45  | 6.63 | 6.61 | 6.67 |
| TC0500948  | OXCT1                                                           | 5019   | 3-oxoacid CoA transferase 1               | 1.45E-05 | 2 | 3.38 | 3.41 | 3.41 | 3.66 | 3.84  | 3.70 | 3.80 | 3.67 |
| TC0Y00112  | P2RY8                                                           | 286530 | purinergic receptor P2Y, G-protein couj   | 1.41E-08 | 2 | 6.51 | 6.60 | 6.61 | 6.71 | 6.77  | 6.84 | 6.91 | 6.75 |
| TC17r00049 | P4HB                                                            | 5034   | procollagen-proline, 2-oxoglutarate 4-c   | 5.08E-05 | 2 | 5.89 | 6.52 | 6.30 | 6.54 | 6.70  | 6.53 | 6.45 | 6.34 |
| TC1701785  | P4HB                                                            | 5034   | procollagen-proline, 2-oxoglutarate 4-c   | 0.000124 | 2 | 5.51 | 6.12 | 5.92 | 6.09 | 6.23  | 6.11 | 6.04 | 5.94 |
| TC0102146  | PABPC4                                                          | 8761   | poly(A) binding protein, cytoplasmic 4 (  | 1.78E-09 | 2 | 4.78 | 5.04 | 5.01 | 5.11 | 5.29  | 5.25 | 5.28 | 5.12 |
| TC0600067  | PAK1IP1                                                         | 55003  | PAK1 interacting protein 1                | 4.88E-05 | 2 | 3.56 | 3.70 | 3.73 | 3.83 | 3.91  | 3.94 | 4.04 | 3.93 |
| TC1500224  | PAK6 /// BUB1 56924 /// p21 protein (Cdc42/Rac)-activated kina  |        |                                           | 6.36E-06 | 2 | 3.44 | 3.52 | 3.46 | 3.63 | 3.80  | 3.79 | 3.70 | 3.60 |
| TC1600943  | PALB2                                                           | 79728  | partner and localizer of BRCA2            | 0.000502 | 2 | 3.18 | 3.22 | 3.16 | 3.26 | 3.40  | 3.37 | 3.44 | 3.38 |
| TC0600456  | PAQR8                                                           | 85315  | progesterin and adipoQ receptor family r  | 3.03E-06 | 2 | 3.87 | 4.17 | 4.10 | 4.25 | 4.38  | 4.33 | 4.23 | 4.13 |
| TC2000371  | PARD6B                                                          | 84612  | par-6 partitioning defective 6 homolog    | 0.000247 | 2 | 3.89 | 3.86 | 3.78 | 3.94 | 4.04  | 4.00 | 3.92 | 3.94 |
| TC0100087  | PARK7                                                           | 11315  | Parkinson disease (autosomal recessive    | 3.86E-15 | 2 | 7.42 | 7.72 | 8.04 | 8.12 | 8.21  | 8.13 | 8.09 | 7.98 |
| TC0103286  | PARP1                                                           | 142    | poly (ADP-ribose) polymerase family, nr   | 5.65E-09 | 2 | 4.10 | 4.35 | 4.31 | 4.54 | 4.49  | 4.58 | 4.83 | 4.64 |
| TC0900566  | PBX3                                                            | 5090   | pre-B-cell leukemia homeobox 3 /// Pr     | 6.49E-16 | 2 | 5.11 | 5.54 | 5.67 | 5.81 | 5.75  | 5.69 | 5.64 | 5.59 |
| TC0500490  | PCBD2                                                           | 84105  | pterin-4 alpha-carbinolamine dehydrat     | 6.84E-05 | 2 | 3.61 | 3.90 | 3.98 | 3.95 | 4.09  | 4.07 | 4.14 | 3.99 |
| TC0200324  | PCBP1                                                           | 5093   | poly(rC) binding protein 1                | 1.82E-08 | 2 | 9.50 | 9.88 | 9.87 | 9.96 | 10.03 | 9.97 | 9.87 | 9.92 |
| TC0300643  | PCCB                                                            | 5096   | propionyl Coenzyme A carboxylase, bet     | 3.94E-06 | 2 | 4.10 | 4.14 | 4.10 | 4.32 | 4.32  | 4.27 | 4.22 | 4.23 |

|           |         |        |                                         |          |   |      |      |      |      |      |      |      |      |
|-----------|---------|--------|-----------------------------------------|----------|---|------|------|------|------|------|------|------|------|
| TC0201640 | PCGF1   | 84759  | polycomb group ring finger 1 /// Polyc  | 5.75E-05 | 2 | 5.02 | 4.90 | 5.04 | 5.24 | 5.09 | 5.18 | 5.26 | 5.21 |
| TC1001253 | PCGF6   | 84108  | polycomb group ring finger 6            | 3.78E-06 | 2 | 3.38 | 3.42 | 3.64 | 3.71 | 3.83 | 3.74 | 3.72 | 3.67 |
| TC1300660 | PCID2   | 55795  | PCI domain containing 2 /// PCI domair  | 0.000472 | 2 | 3.51 | 3.47 | 3.48 | 3.52 | 3.61 | 3.57 | 3.66 | 3.59 |
| TC2000533 | PCNA    | 5111   | proliferating cell nuclear antigen      | 3.63E-17 | 2 | 4.12 | 4.37 | 4.13 | 5.14 | 5.66 | 5.81 | 5.63 | 5.15 |
| TC0300455 | PCNP    | 57092  | PEST proteolytic signal containing nucl | 3.69E-06 | 2 | 6.24 | 6.62 | 6.76 | 6.94 | 6.77 | 6.85 | 6.87 | 6.80 |
| TC0301627 | PCOLCE2 | 26577  | procollagen C-endopeptidase enhancer    | 5.58E-13 | 2 | 3.66 | 4.52 | 5.86 | 5.89 | 6.16 | 6.07 | 5.51 | 4.81 |
| TC0200325 | PCYOX1  | 51449  | prenylcysteine oxidase 1                | 5.51E-11 | 2 | 4.35 | 4.31 | 4.36 | 4.77 | 4.92 | 4.88 | 5.03 | 4.76 |
| TC0701453 | PDAP1   | 11333  | PDGFA associated protein 1              | 3.42E-06 | 2 | 6.92 | 7.10 | 7.02 | 7.22 | 7.25 | 7.17 | 7.28 | 7.20 |
| TC0601776 | PDCD2   | 5134   | programmed cell death 2                 | 8.18E-11 | 2 | 5.08 | 5.24 | 5.28 | 5.45 | 5.50 | 5.53 | 5.56 | 5.47 |
| TC1900403 | PDCD5   | 9141   | programmed cell death 5 /// Programn    | 2.35E-08 | 2 | 5.86 | 6.39 | 6.52 | 6.64 | 6.77 | 6.70 | 6.80 | 6.55 |
| TC1501037 | PDCD7   | 10081  | programmed cell death 7 /// Programn    | 3.59E-06 | 2 | 5.10 | 5.21 | 5.20 | 5.33 | 5.48 | 5.59 | 5.63 | 5.46 |
| TC0901312 | PDCL    | 5082   | phosducin-like                          | 4.75E-06 | 2 | 4.49 | 4.83 | 4.74 | 4.86 | 4.75 | 4.76 | 4.91 | 4.87 |
| TC0200526 | PDCL3   | 79031  | phosducin-like 3                        | 8.06E-10 | 2 | 5.10 | 5.23 | 5.25 | 5.86 | 5.86 | 5.89 | 6.06 | 5.91 |
| TC0X00077 | PDHA1   | 5160   | pyruvate dehydrogenase (lipoamide) al   | 5.56E-05 | 2 | 5.23 | 5.68 | 5.53 | 5.61 | 5.92 | 5.87 | 5.79 | 5.55 |
| TC1500284 | PDIA3   | 2923   | protein disulfide isomerase family A, m | 4.55E-08 | 2 | 6.33 | 6.43 | 6.35 | 6.75 | 6.63 | 6.75 | 6.92 | 6.84 |
| TC0701735 | PDIA4   | 9601   | protein disulfide isomerase family A, m | 0.000646 | 2 | 4.54 | 4.67 | 4.63 | 4.81 | 4.91 | 4.79 | 4.91 | 4.78 |
| TC0201310 | PDIA6   | 10130  | protein disulfide isomerase family A, m | 2.38E-06 | 2 | 4.68 | 4.86 | 4.86 | 5.06 | 5.11 | 5.15 | 5.22 | 5.10 |
| TC0100281 | PDIK1L  | 149420 | PDLIM1 interacting kinase 1 like        | 0.000501 | 2 | 3.60 | 3.69 | 3.69 | 3.78 | 3.94 | 3.90 | 3.86 | 3.80 |
| TC1001179 | PDLIM1  | 9124   | PDZ and LIM domain 1 (elfin)            | 2.19E-10 | 2 | 4.99 | 4.96 | 4.98 | 6.00 | 5.91 | 6.24 | 6.20 | 6.10 |
| TC0400408 | PDLIM5  | 10611  | PDZ and LIM domain 5 /// PDZ and LIM    | 1.32E-05 | 2 | 5.20 | 5.46 | 5.60 | 5.70 | 5.63 | 5.68 | 5.59 | 5.61 |
| TC2000659 | PDRG1   | 81572  | p53 and DNA damage regulated 1          | 0.000349 | 2 | 4.13 | 4.41 | 4.34 | 4.46 | 4.46 | 4.59 | 4.79 | 4.61 |
| TC0400894 | PDS5A   | 23244  | PDS5, regulator of cohesion maintenanc  | 0.000686 | 2 | 5.06 | 5.59 | 5.57 | 5.70 | 5.70 | 5.68 | 5.77 | 5.58 |
| TC1600202 | PDXDC1  | 23042  | pyridoxal-dependent decarboxylase do    | 1.09E-08 | 2 | 5.01 | 5.00 | 4.89 | 5.14 | 5.37 | 5.36 | 5.32 | 5.19 |
| TC1200736 | PEBP1   | 5037   | phosphatidylethanolamine binding pro    | 0.000512 | 2 | 4.86 | 5.20 | 5.30 | 5.31 | 5.35 | 5.37 | 5.36 | 5.29 |
| TC0401033 | PF4     | 5196   | platelet factor 4 (chemokine (C-X-C mo  | 2.36E-06 | 2 | 5.98 | 6.82 | 6.48 | 7.41 | 7.77 | 7.85 | 7.50 | 7.59 |
| TC0400314 | PF4V1   | 5197   | platelet factor 4 variant 1             | 1.66E-05 | 2 | 3.78 | 4.58 | 4.27 | 5.05 | 5.39 | 5.69 | 5.35 | 5.45 |
| TC0102932 | PFDN2   | 5202   | prefoldin subunit 2                     | 2.60E-12 | 2 | 6.60 | 6.60 | 6.54 | 7.00 | 7.02 | 7.03 | 7.13 | 7.06 |
| TC2000383 | PFDN4   | 5203   | prefoldin subunit 4                     | 0.000105 | 2 | 4.03 | 4.22 | 4.22 | 4.25 | 4.41 | 4.33 | 4.35 | 4.20 |
| TC0700466 | PFTK1   | 5218   | PFTAIRE protein kinase 1 /// Serine/thr | 1.94E-05 | 2 | 6.01 | 6.59 | 6.49 | 6.75 | 6.74 | 6.86 | 6.61 | 6.53 |
| TC0101729 | PGBD2   | 267002 | piggyBac transposable element derived   | 3.33E-06 | 2 | 4.43 | 4.42 | 4.42 | 4.47 | 4.56 | 4.64 | 4.67 | 4.63 |
| TC1900303 | PGLS    | 25796  | 6-phosphogluconolactonase               | 1.67E-07 | 2 | 5.35 | 5.72 | 5.79 | 5.87 | 5.88 | 5.90 | 5.87 | 5.87 |
| TC0X00525 | PGRMC1  | 10857  | progesterone receptor membrane com      | 0.000138 | 2 | 5.19 | 5.88 | 5.68 | 5.94 | 6.15 | 6.10 | 5.92 | 5.88 |
| TC0401248 | PGRMC2  | 10424  | progesterone receptor membrane com      | 3.95E-08 | 2 | 5.22 | 5.23 | 5.19 | 5.42 | 5.42 | 5.42 | 5.63 | 5.62 |
| TC0601770 | PHF10   | 55274  | PHD finger protein 10 /// PHD finger pr | 6.56E-06 | 2 | 4.24 | 4.30 | 4.34 | 4.58 | 4.71 | 4.70 | 4.86 | 4.68 |



|           |         |        |                                           |          |   |      |      |      |      |      |      |      |      |
|-----------|---------|--------|-------------------------------------------|----------|---|------|------|------|------|------|------|------|------|
| TC0700073 | PHF14   | 9678   | PHD finger protein 14                     | 2.95E-07 | 2 | 3.72 | 4.13 | 4.32 | 4.53 | 4.55 | 4.46 | 4.62 | 4.40 |
| TC1000773 | PHYH    | 5264   | phytanoyl-CoA 2-hydroxylase /// Phyta     | 1.92E-07 | 2 | 4.17 | 4.37 | 4.37 | 4.47 | 4.49 | 4.51 | 4.54 | 4.45 |
| TC0400136 | PI4K2B  | 55300  | phosphatidylinositol 4-kinase type 2 be   | 3.23E-08 | 2 | 3.87 | 4.25 | 4.24 | 4.45 | 4.66 | 4.66 | 4.74 | 4.52 |
| TC1800517 | PIGN    | 23556  | phosphatidylinositol glycan anchor bio:   | 0.000526 | 2 | 3.82 | 3.89 | 3.98 | 4.02 | 4.03 | 4.08 | 4.16 | 4.05 |
| TC1701168 | PIGS    | 94005  | phosphatidylinositol glycan anchor bio:   | 2.20E-05 | 2 | 5.43 | 5.79 | 5.86 | 6.01 | 5.89 | 5.83 | 5.90 | 5.87 |
| TC2000683 | PIGU    | 128869 | phosphatidylinositol glycan anchor bio:   | 1.83E-06 | 2 | 4.17 | 4.37 | 4.36 | 4.48 | 4.87 | 4.81 | 4.65 | 4.56 |
| TC0401117 | PIGY    | 84992  | phosphatidylinositol glycan anchor bio:   | 8.37E-13 | 2 | 4.20 | 5.41 | 5.21 | 5.55 | 5.53 | 5.64 | 5.80 | 5.50 |
| TC1100767 | PIWIL4  | 143689 | piwi-like 4 (Drosophila)                  | 1.86E-10 | 2 | 3.08 | 3.46 | 3.34 | 4.00 | 4.45 | 4.40 | 4.30 | 3.73 |
| TC1201093 | PKP2    | 5318   | plakophilin 2                             | 5.60E-09 | 2 | 3.90 | 4.14 | 4.10 | 4.37 | 4.57 | 4.47 | 4.60 | 4.39 |
| TC2000661 | PLAGL2  | 5326   | pleiomorphic adenoma gene-like 2          | 1.45E-05 | 2 | 5.33 | 5.50 | 5.36 | 5.60 | 5.68 | 5.76 | 5.72 | 5.71 |
| TC1000347 | PLAU    | 5328   | plasminogen activator, urokinase /// U    | 3.64E-06 | 2 | 3.90 | 3.97 | 3.93 | 3.96 | 4.09 | 4.16 | 4.07 | 4.00 |
| TC0300093 | PLCL2   | 23228  | phospholipase C-like 2                    | 0.000899 | 2 | 6.73 | 6.85 | 6.79 | 7.03 | 6.85 | 6.98 | 7.13 | 7.05 |
| TC0700152 | PLEKHA8 | 84725  | pleckstrin homology domain containin      | 0.000197 | 2 | 3.82 | 3.96 | 3.91 | 3.99 | 4.03 | 4.03 | 4.05 | 4.02 |
| TC1201124 | PLEKHA9 | 51054  | pleckstrin homology domain containin      | 0.000625 | 2 | 4.17 | 4.30 | 4.24 | 4.44 | 4.54 | 4.58 | 4.56 | 4.53 |
| TC1600267 | PLK1    | 5347   | polo-like kinase 1 (Drosophila) /// Serin | 9.97E-06 | 2 | 4.41 | 4.52 | 4.50 | 4.67 | 4.82 | 4.82 | 4.67 | 4.59 |
| TC0400523 | PLK4    | 10733  | polo-like kinase 4 (Drosophila)           | 1.32E-06 | 2 | 2.62 | 2.77 | 2.69 | 2.98 | 3.37 | 3.33 | 3.23 | 2.96 |
| TC0300679 | PLS1    | 5357   | plastin 1 (I isoform)                     | 0.000758 | 2 | 2.71 | 2.85 | 2.75 | 2.82 | 3.04 | 2.97 | 2.96 | 2.87 |
| TC1701048 | PMP22   | 5376   | peripheral myelin protein 22              | 0.000157 | 2 | 4.41 | 4.62 | 4.62 | 4.76 | 4.73 | 4.78 | 4.75 | 4.79 |
| TC0200935 | PMS1    | 5378   | PMS1 postmeiotic segregation increase     | 0.000751 | 2 | 3.17 | 3.25 | 3.26 | 3.30 | 3.38 | 3.29 | 3.32 | 3.30 |
| TC1400980 | PNMA1   | 9240   | paraneoplastic antigen MA1                | 0.000232 | 2 | 3.86 | 4.12 | 4.39 | 4.61 | 4.63 | 4.47 | 4.23 | 4.14 |
| TC0101255 | POGK    | 57645  | pogo transposable element with KRAB       | 4.81E-07 | 2 | 4.70 | 4.89 | 4.82 | 4.96 | 5.09 | 5.06 | 5.09 | 4.97 |
| TC0X00100 | POLA1   | 5422   | polymerase (DNA directed), alpha 1 ///    | 5.69E-07 | 2 | 3.33 | 3.39 | 3.32 | 3.58 | 3.89 | 3.78 | 3.81 | 3.60 |
| TC1201710 | POLE    | 5426   | polymerase (DNA directed), epsilon ///    | 3.25E-06 | 2 | 4.25 | 4.19 | 4.09 | 4.25 | 4.49 | 4.49 | 4.44 | 4.27 |
| TC1300051 | POLR1D  | 51082  | polymerase (RNA) I polypeptide D, 16k     | 2.66E-07 | 2 | 5.27 | 5.46 | 5.65 | 5.77 | 5.79 | 5.78 | 5.90 | 5.78 |
| TC1100486 | POLR2G  | 5436   | polymerase (RNA) II (DNA directed) pol    | 1.88E-09 | 2 | 5.77 | 5.52 | 5.83 | 5.99 | 6.01 | 5.92 | 6.07 | 5.95 |
| TC0300859 | POLR2H  | 5437   | polymerase (RNA) II (DNA directed) pol    | 1.02E-06 | 2 | 4.01 | 4.16 | 4.03 | 4.35 | 4.45 | 4.46 | 4.47 | 4.26 |
| TC1901428 | POLR2I  | 5438   | polymerase (RNA) II (DNA directed) pol    | 2.98E-06 | 2 | 5.06 | 5.27 | 5.28 | 5.51 | 5.58 | 5.50 | 5.57 | 5.62 |
| TC0800464 | POLR2K  | 5440   | polymerase (RNA) II (DNA directed) pol    | 4.74E-08 | 2 | 5.83 | 6.25 | 6.32 | 6.74 | 6.81 | 6.77 | 6.88 | 6.65 |
| TC1101050 | POLR2L  | 5441   | polymerase (RNA) II (DNA directed) pol    | 6.79E-12 | 2 | 6.39 | 7.29 | 7.46 | 7.69 | 7.76 | 7.69 | 7.56 | 7.27 |
| TC0102635 | POLR3C  | 10623  | polymerase (RNA) III (DNA directed) po    | 2.98E-10 | 2 | 4.92 | 4.84 | 4.95 | 5.21 | 5.23 | 5.28 | 5.47 | 5.28 |
| TC0500335 | POLR3G  | 10622  | polymerase (RNA) III (DNA directed) po    | 4.97E-06 | 2 | 4.18 | 4.47 | 4.45 | 4.71 | 4.76 | 5.08 | 5.02 | 4.97 |
| TC0102631 | POLR3GL | 84265  | polymerase (RNA) III (DNA directed) po    | 5.04E-10 | 2 | 5.62 | 5.85 | 6.08 | 6.23 | 6.03 | 6.18 | 6.38 | 6.27 |
| TC1600706 | POLR3K  | 51728  | polymerase (RNA) III (DNA directed) po    | 1.06E-09 | 2 | 4.97 | 4.81 | 4.94 | 5.15 | 5.22 | 5.37 | 5.45 | 5.36 |
| TC1001041 | PPA1    | 5464   | pyrophosphatase (inorganic) 1 /// Inor    | 4.41E-06 | 2 | 3.01 | 3.45 | 3.14 | 3.63 | 3.82 | 3.76 | 3.70 | 3.45 |

|           |         |        |                                            |          |   |      |      |       |       |       |       |       |      |
|-----------|---------|--------|--------------------------------------------|----------|---|------|------|-------|-------|-------|-------|-------|------|
| TC0102290 | PPAP2B  | 8613   | phosphatidic acid phosphatase type 2B      | 0.000284 | 2 | 3.33 | 3.44 | 3.49  | 3.47  | 3.59  | 3.57  | 3.44  | 3.42 |
| TC0401034 | PPBP    | 5473   | pro-platelet basic protein (chemokine (    | 4.08E-11 | 2 | 5.68 | 8.00 | 7.23  | 9.25  | 9.65  | 9.76  | 9.22  | 9.33 |
| TC0X00075 | PPEF1   | 5475   | protein phosphatase, EF-hand calcium       | 8.68E-07 | 2 | 2.38 | 2.43 | 2.42  | 2.38  | 2.71  | 2.55  | 2.46  | 2.42 |
| TC1501027 | PPIB    | 5479   | peptidylprolyl isomerase B (cyclophilin    | 9.28E-07 | 2 | 6.50 | 6.83 | 6.94  | 7.21  | 7.21  | 7.12  | 7.11  | 7.08 |
| TC0100449 | PPIH    | 10465  | peptidylprolyl isomerase H (cyclophilin    | 1.13E-07 | 2 | 3.75 | 3.73 | 3.68  | 3.90  | 4.06  | 4.01  | 4.20  | 4.01 |
| TC0201391 | PPM1G   | 5496   | protein phosphatase 1G (formerly 2C),      | 1.02E-16 | 2 | 5.62 | 5.52 | 5.55  | 5.87  | 5.88  | 5.95  | 6.05  | 5.96 |
| TC0201242 | PPP1R7  | 5510   | protein phosphatase 1, regulatory (inhi    | 2.66E-05 | 2 | 7.39 | 7.34 | 7.43  | 7.60  | 7.51  | 7.62  | 7.74  | 7.71 |
| TC0100314 | PPP1R8  | 5511   | protein phosphatase 1, regulatory (inhi    | 7.83E-05 | 2 | 4.87 | 4.89 | 4.98  | 4.99  | 5.04  | 5.04  | 5.15  | 5.10 |
| TC0800848 | PPP2CB  | 5516   | protein phosphatase 2 (formerly 2A), c     | 0.000605 | 2 | 5.59 | 6.06 | 5.96  | 6.24  | 6.19  | 6.23  | 6.22  | 6.22 |
| TC0101499 | PPP2R5A | 5525   | protein phosphatase 2, regulatory sub      | 0.000346 | 2 | 6.95 | 7.62 | 7.60  | 7.58  | 7.68  | 7.72  | 7.62  | 7.58 |
| TC1400592 | PPP2R5C | 5527   | protein phosphatase 2, regulatory sub      | 8.34E-06 | 2 | 7.41 | 7.61 | 7.68  | 7.71  | 7.54  | 7.67  | 7.68  | 7.78 |
| TC0X00216 | PQBP1   | 10084  | polyglutamine binding protein 1 /// Po     | 0.000636 | 2 | 6.18 | 6.42 | 6.27  | 6.54  | 6.51  | 6.46  | 6.51  | 6.43 |
| TC1501243 | PRC1    | 9055   | protein regulator of cytokinesis 1         | 5.71E-09 | 2 | 4.04 | 4.29 | 4.15  | 4.48  | 4.98  | 4.90  | 4.71  | 4.44 |
| TC0100156 | PRDM2   | 7799   | PR domain containing 2, with ZNF dom       | 4.00E-05 | 2 | 6.47 | 6.51 | 6.55  | 6.65  | 6.72  | 6.71  | 6.73  | 6.55 |
| TC1100517 | PRDX5   | 25824  | peroxiredoxin 5                            | 8.22E-13 | 2 | 9.39 | 9.91 | 10.05 | 10.23 | 10.19 | 10.17 | 10.02 | 9.92 |
| TC0500748 | PRELID1 | 649930 | // PRELI domain containing 1               | 0.000691 | 2 | 9.34 | 9.54 | 9.49  | 9.63  | 9.50  | 9.65  | 9.71  | 9.74 |
| TC0601489 | PREP    | 5550   | prolyl endopeptidase /// Prolyl endope     | 1.17E-06 | 2 | 3.76 | 3.96 | 3.91  | 4.12  | 4.26  | 4.14  | 4.29  | 3.97 |
| TC0201476 | PREPL   | 9581   | prolyl endopeptidase-like                  | 1.14E-09 | 2 | 4.01 | 4.01 | 3.96  | 4.40  | 4.57  | 4.60  | 4.61  | 4.38 |
| TC1201307 | PRIM1   | 5557   | primase, DNA, polypeptide 1 (49kDa)        | 1.36E-09 | 2 | 3.50 | 3.68 | 3.63  | 3.99  | 4.33  | 4.26  | 4.24  | 4.06 |
| TC0600481 | PRIM2   | 5558   | primase, DNA, polypeptide 2 (58kDa)        | 0.000513 | 2 | 2.75 | 2.89 | 2.89  | 2.97  | 3.04  | 3.03  | 3.06  | 2.98 |
| TC0100686 | PRKACB  | 5567   | protein kinase, cAMP-dependent, catal      | 3.43E-05 | 2 | 3.49 | 3.57 | 3.54  | 3.67  | 3.67  | 3.79  | 3.77  | 3.76 |
| TC0700605 | PRKAR2B | 5577   | protein kinase, cAMP-dependent, regu       | 3.52E-07 | 2 | 3.52 | 4.39 | 4.06  | 5.64  | 6.13  | 6.13  | 5.50  | 5.48 |
| TC0700574 | PRKRIP1 | 79706  | PRKR interacting protein 1 (IL11 induc     | 1.59E-05 | 2 | 5.55 | 5.53 | 5.53  | 5.70  | 5.67  | 5.72  | 5.78  | 5.70 |
| TC1100227 | PRMT3   | 10196  | protein arginine methyltransferase 3 //    | 2.74E-05 | 2 | 3.67 | 3.64 | 3.67  | 3.75  | 3.80  | 3.82  | 3.82  | 3.83 |
| TC0X00043 | PRPS2   | 5634   | phosphoribosyl pyrophosphate synthet       | 6.95E-08 | 2 | 4.10 | 4.38 | 4.31  | 4.49  | 4.57  | 4.61  | 4.67  | 4.60 |
| TC1701713 | PRPSAP1 | 5635   | phosphoribosyl pyrophosphate synthet       | 1.37E-07 | 2 | 4.23 | 4.40 | 4.30  | 4.53  | 4.70  | 4.58  | 4.55  | 4.36 |
| TC1700640 | PRR11   | 55771  | proline rich 11                            | 2.70E-07 | 2 | 4.06 | 4.16 | 4.21  | 4.46  | 4.56  | 4.56  | 4.70  | 4.61 |
| TC0500444 | PRRC1   | 133619 | proline-rich coiled-coil 1 /// proline-ric | 7.03E-09 | 2 | 5.00 | 5.49 | 5.72  | 5.80  | 5.85  | 5.77  | 5.85  | 5.62 |
| TC1900020 | PRTN3   | 5657   | proteinase 3 (serine proteinase, neutro    | 0.000134 | 2 | 5.07 | 5.31 | 5.28  | 5.48  | 5.62  | 5.51  | 5.47  | 5.26 |
| TC0900314 | PSAT1   | 29968  | phosphoserine aminotransferase 1           | 4.73E-05 | 2 | 3.09 | 3.25 | 3.24  | 3.44  | 3.70  | 3.50  | 3.48  | 3.26 |
| TC0701157 | PSMA2   | 5683   | proteasome (prosome, macropain) sub        | 2.48E-10 | 2 | 6.95 | 7.53 | 7.78  | 7.70  | 7.69  | 7.74  | 7.81  | 7.76 |
| TC1500524 | PSMA4   | 5685   | proteasome (prosome, macropain) sub        | 0.000123 | 2 | 6.83 | 7.32 | 7.37  | 7.37  | 7.22  | 7.36  | 7.47  | 7.46 |
| TC0102518 | PSMA5   | 5686   | proteasome (prosome, macropain) sub        | 2.53E-05 | 2 | 5.67 | 5.95 | 6.12  | 6.21  | 6.15  | 6.26  | 6.37  | 6.37 |
| TC2000879 | PSMA7   | 5688   | proteasome (prosome, macropain) sub        | 1.56E-05 | 2 | 6.89 | 7.00 | 7.13  | 7.17  | 7.20  | 7.25  | 7.26  | 7.16 |

|           |                         |           |                                         |          |   |      |       |       |       |       |       |       |       |
|-----------|-------------------------|-----------|-----------------------------------------|----------|---|------|-------|-------|-------|-------|-------|-------|-------|
| TC0102107 | PSMB2                   | 5690      | proteasome (prosome, macropain) sub     | 3.71E-05 | 2 | 4.83 | 5.16  | 5.19  | 5.26  | 5.35  | 5.35  | 5.47  | 5.38  |
| TC1400712 | PSMB5                   | 5693      | proteasome (prosome, macropain) sub     | 1.05E-07 | 2 | 4.47 | 4.52  | 4.85  | 4.82  | 4.80  | 4.70  | 4.77  | 4.68  |
| TC0200817 | PSMD14                  | 10213     | proteasome (prosome, macropain) 26S     | 2.47E-06 | 2 | 3.80 | 4.64  | 4.73  | 4.77  | 5.00  | 4.93  | 4.88  | 4.55  |
| TC2100346 | PSMG1                   | 8624      | proteasome (prosome, macropain) ass     | 5.03E-10 | 2 | 4.44 | 4.77  | 4.64  | 4.95  | 5.23  | 5.25  | 5.23  | 4.94  |
| TC1800068 | PSMG2 /// TNF           | 56984     | proteasome (prosome, macropain) ass     | 8.47E-06 | 2 | 4.35 | 4.64  | 4.70  | 4.64  | 4.72  | 4.77  | 4.85  | 4.79  |
| TC0200418 | PTCD3                   | 55037     | Pentatricopeptide repeat domain 3       | 7.50E-08 | 2 | 3.66 | 3.51  | 3.55  | 3.85  | 3.99  | 4.02  | 4.14  | 3.90  |
| TC0800444 | PTDSS1                  | 9791      | phosphatidylserine synthase 1           | 1.33E-08 | 2 | 4.15 | 4.56  | 4.40  | 4.78  | 5.08  | 5.09  | 5.05  | 4.67  |
| TC0102074 | PTP4A2                  | 8073      | protein tyrosine phosphatase type IVA,  | 1.26E-06 | 2 | 8.63 | 8.84  | 8.92  | 8.95  | 8.93  | 8.89  | 8.93  | 8.96  |
| TC0900807 | PTPLAD2                 | 401494    | protein tyrosine phosphatase-like A do  | 0.000259 | 2 | 7.41 | 7.68  | 7.97  | 7.84  | 7.73  | 7.90  | 7.83  | 7.96  |
| TC0301501 | PTPLB                   | 201562    | protein tyrosine phosphatase-like (prol | 1.73E-08 | 2 | 4.71 | 4.61  | 4.46  | 5.09  | 5.20  | 5.21  | 5.23  | 5.09  |
| TC1100323 | PTPMT1 /// NC 114971 // |           | protein tyrosine phosphatase, mitoch    | 2.20E-06 | 2 | 5.19 | 5.27  | 5.40  | 5.56  | 5.58  | 5.56  | 5.67  | 5.48  |
| TC1200709 | PTPN11                  | 647552 // | protein tyrosine phosphatase, non-rece  | 7.07E-05 | 2 | 6.82 | 7.26  | 7.12  | 7.32  | 7.31  | 7.29  | 7.38  | 7.21  |
| TC0500663 | PTTG1                   | 9232      | pituitary tumor-transforming 1          | 3.26E-10 | 2 | 4.19 | 4.44  | 4.21  | 4.80  | 5.25  | 5.12  | 4.99  | 4.65  |
| TC0300742 | PTX3                    | 5806      | pentraxin-related gene, rapidly induce  | 3.40E-15 | 2 | 3.93 | 4.75  | 4.45  | 4.64  | 4.85  | 4.86  | 4.67  | 4.56  |
| TC0500525 | PURA                    | 5813      | purine-rich element binding protein A   | 1.33E-06 | 2 | 4.55 | 4.56  | 4.63  | 4.86  | 4.92  | 5.00  | 5.30  | 5.15  |
| TC1200669 | PWP1                    | 11137     | PWP1 homolog (S. cerevisiae)            | 1.69E-05 | 2 | 4.56 | 4.45  | 4.49  | 4.76  | 4.80  | 4.86  | 4.96  | 4.91  |
| TC1200846 | PXMP2                   | 5827      | peroxisomal membrane protein 2, 22kD    | 1.28E-06 | 2 | 4.57 | 4.76  | 4.67  | 4.94  | 5.13  | 5.12  | 4.96  | 4.81  |
| TC1601037 | PYCARD                  | 29108     | PYD and CARD domain containing /// A    | 2.82E-05 | 2 | 6.79 | 6.75  | 6.92  | 7.21  | 7.09  | 7.07  | 6.95  | 7.03  |
| TC0200507 | Q08AK5_HUM/---          |           | KIAA1641. [Source:Uniprot/SPTREMBL;]    | 0.000167 | 2 | 3.62 | 4.18  | 3.83  | 4.01  | 4.28  | 4.31  | 4.22  | 3.94  |
| TC1400447 | Q15203_HUM/---          |           | Prothymosin alpha. [Source:Uniprot/SF   | 5.13E-07 | 2 | 5.37 | 5.59  | 5.53  | 5.78  | 6.04  | 5.98  | 6.02  | 5.97  |
| TC2000368 | Q4G0G3_HUM---           |           | ---                                     | 0.000973 | 2 | 5.19 | 5.03  | 4.93  | 5.31  | 5.26  | 5.31  | 5.23  | 4.95  |
| TC0201743 | Q53S06_HUM/---          |           | ---                                     | 0.000361 | 2 | 3.91 | 4.19  | 4.12  | 4.27  | 4.42  | 4.41  | 4.39  | 4.12  |
| TC0300103 | Q5T7C6_HUM/---          |           | High-mobility group box 1 (Fragment).   | 0.000737 | 2 | 4.51 | 4.95  | 5.05  | 5.14  | 5.10  | 5.19  | 5.11  | 5.03  |
| TC0600355 | Q5T8I0_HUMA---          |           | OTTHUMP00000016319. [Source:Unipr       | 5.95E-11 | 2 | 7.23 | 7.79  | 7.90  | 7.89  | 7.91  | 7.93  | 7.93  | 7.88  |
| TC0601272 | Q5T8W0_HUM---           |           | OTTHUMP00000016411 (Fragment). [S       | 2.66E-09 | 2 | 7.66 | 8.35  | 8.32  | 8.73  | 8.78  | 8.84  | 8.80  | 8.65  |
| TC0102696 | Q5TEC7_HUM/---          |           | Family with sequence similarity 72, me  | 0.000155 | 2 | 3.25 | 3.20  | 3.10  | 3.48  | 3.76  | 3.66  | 3.66  | 3.45  |
| TC0700592 | Q6AI40_HUMA---          |           | ---                                     | 1.40E-05 | 2 | 7.10 | 7.84  | 7.69  | 7.89  | 7.91  | 7.83  | 7.91  | 7.72  |
| TC0701054 | Q75MH1_HUV---           |           | Ribosomal protein S26 (Fragment). [Soi  | 2.81E-08 | 2 | 5.92 | 6.67  | 6.69  | 6.82  | 6.90  | 6.90  | 6.86  | 6.77  |
| TC0800954 | Q8N287_HUM/---          |           | CDNA FLJ33669 fis, clone BRAMY20287     | 0.000828 | 2 | 5.13 | 6.07  | 6.24  | 6.28  | 6.46  | 6.45  | 6.53  | 6.03  |
| TC0300671 | Q96NB8_HUM.---          |           | CDNA FLJ31131 fis, clone IMR3220009E    | 6.07E-05 | 2 | 6.84 | 7.05  | 7.17  | 7.05  | 7.05  | 7.43  | 7.77  | 7.72  |
| TC1001222 | Q9H354_HUM/---          |           | ---                                     | 2.77E-18 | 2 | 4.12 | 5.92  | 4.88  | 6.87  | 7.60  | 8.14  | 7.73  | 6.87  |
| TC2000488 | Q9NQ39_HUM---           |           | Ribosomal protein S10-like pseudogen    | 1.99E-05 | 2 | 7.38 | 7.53  | 7.62  | 7.73  | 7.79  | 7.85  | 7.76  | 7.74  |
| TC1200950 | Q9NYD3_HUM---           |           | Prothymosin alpha. [Source:Uniprot/SF   | 1.27E-14 | 2 | 8.64 | 8.85  | 8.56  | 9.24  | 9.58  | 9.69  | 9.70  | 9.46  |
| TC0301006 | Q9NZ47_HUM/---          |           | Uncharacterized hematopoietic stem/c    | 2.25E-08 | 2 | 9.57 | 10.07 | 10.14 | 10.21 | 10.20 | 10.14 | 10.15 | 10.14 |

|           |              |        |                                         |          |   |      |      |      |      |      |      |      |      |
|-----------|--------------|--------|-----------------------------------------|----------|---|------|------|------|------|------|------|------|------|
| TC1201241 | Q9P192_HUMAN | ---    | ---                                     | 3.45E-06 | 2 | 8.41 | 8.99 | 8.75 | 8.99 | 9.01 | 8.98 | 9.12 | 8.86 |
| TC0102040 | Q9UHS2_HUMAN | ---    | ---                                     | 4.53E-05 | 2 | 5.34 | 5.61 | 5.71 | 5.83 | 5.73 | 5.90 | 6.19 | 6.15 |
| TC0400842 | QDPR         | 5860   | quinoid dihydropteridine reductase      | 4.44E-05 | 2 | 4.33 | 4.45 | 4.37 | 4.49 | 4.68 | 4.60 | 4.64 | 4.48 |
| TC1100259 | QSER1        | ---    | Glutamine and serine-rich protein 1. [S | 6.46E-07 | 2 | 3.95 | 3.96 | 3.89 | 4.14 | 4.25 | 4.24 | 4.32 | 4.21 |
| TC0200738 | R3HDM1       | 23518  | R3H domain containing 1 /// R3H dom     | 1.35E-11 | 2 | 5.43 | 5.97 | 6.04 | 6.21 | 6.14 | 6.16 | 6.24 | 6.18 |
| TC1800039 | RAB12        | 201475 | RAB12, member RAS oncogene family       | 4.30E-06 | 2 | 3.83 | 4.13 | 4.07 | 4.39 | 4.08 | 4.18 | 4.39 | 4.34 |
| TC0102804 | RAB13        | 5872   | RAB13, member RAS oncogene family       | 1.06E-14 | 2 | 5.46 | 6.39 | 5.86 | 6.98 | 7.42 | 7.43 | 7.29 | 6.56 |
| TC0901300 | RAB14        | 51552  | RAB14, member RAS oncogene family       | 4.54E-06 | 2 | 6.65 | 6.74 | 6.98 | 7.09 | 6.93 | 7.02 | 6.98 | 7.01 |
| TC0X01401 | RAB39B       | 116442 | RAB39B, member RAS oncogene family      | 3.56E-09 | 2 | 3.70 | 4.33 | 4.36 | 4.76 | 4.48 | 4.70 | 4.71 | 4.57 |
| TC1201187 | RACGAP1      | 29127  | Rac GTPase activating protein 1         | 4.40E-07 | 2 | 4.31 | 4.40 | 4.35 | 4.57 | 4.97 | 4.89 | 4.83 | 4.58 |
| TC0500910 | RAD1         | 5810   | RAD1 homolog (S. pombe) /// Cell cycle  | 9.15E-07 | 2 | 4.66 | 4.81 | 4.78 | 4.86 | 4.98 | 5.00 | 5.00 | 4.93 |
| TC0300984 | RAD18        | 56852  | RAD18 homolog (S. cerevisiae)           | 2.11E-08 | 2 | 3.53 | 3.52 | 3.49 | 3.69 | 3.82 | 3.85 | 4.05 | 3.95 |
| TC0801207 | RAD21        | 5885   | RAD21 homolog (S. pombe)                | 0.000209 | 2 | 8.97 | 9.18 | 9.00 | 9.06 | 9.02 | 9.17 | 9.16 | 9.22 |
| TC0500466 | RAD50        | 10111  | RAD50 homolog (S. cerevisiae)           | 1.33E-07 | 2 | 3.67 | 3.77 | 3.68 | 4.06 | 4.16 | 4.19 | 4.44 | 4.14 |
| TC1500239 | RAD51        | 5888   | RAD51 homolog (RecA homolog, E. coli    | 5.72E-05 | 2 | 3.68 | 3.79 | 3.70 | 3.88 | 4.15 | 4.13 | 4.02 | 3.89 |
| TC1200032 | RAD51AP1     | 10635  | RAD51 associated protein 1 /// RAD51-   | 3.01E-05 | 2 | 2.22 | 2.37 | 2.30 | 2.51 | 2.87 | 2.83 | 2.73 | 2.56 |
| TC1700634 | RAD51C       | 5889   | RAD51 homolog C (S. cerevisiae)         | 7.35E-09 | 2 | 4.21 | 4.43 | 4.51 | 4.75 | 5.01 | 5.02 | 5.03 | 4.81 |
| TC1701232 | RAD51L3      | 5892   | RAD51-like 3 (S. cerevisiae) /// DNA re | 0.000618 | 2 | 4.61 | 4.66 | 4.62 | 4.66 | 4.76 | 4.77 | 4.76 | 4.67 |
| TC0101115 | RAG1AP1      | 55974  | recombination activating gene 1 activa  | 9.66E-05 | 2 | 5.12 | 5.30 | 5.28 | 5.43 | 5.51 | 5.45 | 5.41 | 5.38 |
| TC0700199 | RALA         | 5898   | v-ral simian leukemia viral oncogene hc | 2.61E-10 | 2 | 4.52 | 5.12 | 5.34 | 5.36 | 5.29 | 5.26 | 5.35 | 5.24 |
| TC1200827 | RAN          | 5901   | RAN, member RAS oncogene family         | 9.30E-12 | 2 | 5.40 | 5.76 | 5.84 | 6.15 | 6.38 | 6.32 | 6.35 | 6.11 |
| TC2200042 | RANBP1       | 5902   | RAN binding protein 1                   | 2.79E-06 | 2 | 5.05 | 5.20 | 5.12 | 5.26 | 5.45 | 5.48 | 5.49 | 5.29 |
| TC0400414 | RAP1GDS1     | 5910   | RAP1, GTP-GDP dissociation stimulator   | 1.44E-06 | 2 | 3.90 | 4.04 | 4.37 | 4.46 | 4.51 | 4.39 | 4.48 | 4.26 |
| TC0500682 | RARS         | 5917   | arginyl-tRNA synthetase                 | 4.59E-06 | 2 | 5.29 | 5.66 | 5.82 | 5.87 | 5.86 | 5.92 | 5.95 | 5.79 |
| TC1300048 | RASL11A      | 387496 | RAS-like, family 11, member A           | 2.39E-06 | 2 | 3.78 | 4.07 | 4.08 | 4.31 | 4.34 | 4.24 | 4.15 | 4.05 |
| TC0100365 | RBBP4        | 648695 | // retinoblastoma binding protein 4     | 2.18E-05 | 2 | 6.06 | 6.19 | 6.27 | 6.53 | 6.63 | 6.46 | 6.54 | 6.38 |
| TC1800101 | RBBP8        | 5932   | retinoblastoma binding protein 8 /// R  | 1.71E-08 | 2 | 4.15 | 4.67 | 4.57 | 4.79 | 4.96 | 4.86 | 4.92 | 4.75 |
| TC2000589 | RBBP9        | 10741  | retinoblastoma binding protein 9 /// R  | 5.63E-06 | 2 | 3.38 | 3.57 | 3.51 | 3.68 | 3.97 | 3.90 | 3.72 | 3.58 |
| TC2000721 | RBL1         | 5933   | retinoblastoma-like 1 (p107)            | 6.65E-08 | 2 | 4.12 | 4.27 | 4.33 | 4.60 | 4.75 | 4.69 | 4.69 | 4.46 |
| TC1101580 | RBM4B        | 83759  | RNA binding motif protein 4B            | 3.36E-06 | 2 | 4.46 | 4.54 | 4.59 | 4.71 | 4.78 | 4.71 | 4.67 | 4.70 |
| TC0100932 | RBM8A        | 9939   | RNA binding motif protein 8A /// RNA-l  | 5.21E-05 | 2 | 8.23 | 8.51 | 8.27 | 8.28 | 8.27 | 8.40 | 8.54 | 8.51 |
| TC0X00563 | RBMX2        | 51634  | RNA binding motif protein, X-linked 2 / | 4.50E-06 | 2 | 5.06 | 5.18 | 5.26 | 5.25 | 5.17 | 5.32 | 5.48 | 5.43 |
| TC0101933 | RCC2         | 55920  | regulator of chromosome condensatio     | 1.11E-08 | 2 | 4.84 | 5.02 | 4.94 | 5.13 | 5.33 | 5.30 | 5.31 | 5.15 |
| TC1500511 | RCN2         | 5955   | reticulocalbin 2, EF-hand calcium bindi | 1.64E-08 | 2 | 3.78 | 3.81 | 3.86 | 3.87 | 3.94 | 4.01 | 4.12 | 4.03 |

|           |                            |        |                                            |          |   |      |      |      |      |      |      |      |      |
|-----------|----------------------------|--------|--------------------------------------------|----------|---|------|------|------|------|------|------|------|------|
| TC1400936 | RDH11                      | 51109  | retinol dehydrogenase 11 (all-trans/9-c    | 0.000513 | 2 | 3.78 | 3.88 | 3.88 | 4.12 | 4.19 | 4.15 | 4.20 | 4.14 |
| TC1101814 | RDX                        | 5962   | radixin                                    | 7.84E-09 | 2 | 4.32 | 5.19 | 5.24 | 5.75 | 5.66 | 5.65 | 5.75 | 5.44 |
| TC1000281 | REEP3                      | 221035 | receptor accessory protein 3 /// Recept    | 2.82E-15 | 2 | 4.99 | 5.52 | 5.62 | 5.84 | 5.84 | 5.84 | 5.82 | 5.88 |
| TC0601645 | REPS1                      | 85021  | RALBP1 associated Eps domain contain       | 7.11E-12 | 2 | 4.35 | 4.32 | 4.46 | 4.70 | 4.63 | 4.67 | 4.78 | 4.71 |
| TC0400252 | REST                       | 5978   | RE1-silencing transcription factor /// Rf  | 3.51E-08 | 2 | 5.93 | 6.30 | 6.31 | 6.45 | 6.37 | 6.37 | 6.39 | 6.35 |
| TC1100866 | REXO2                      | 25996  | REX2, RNA exonuclease 2 homolog (S. c      | 2.25E-07 | 2 | 4.24 | 4.19 | 4.25 | 4.56 | 4.64 | 4.65 | 4.81 | 4.66 |
| TC0301834 | RFC4                       | 5984   | replication factor C (activator 1) 4, 37kI | 0.000126 | 2 | 3.65 | 3.79 | 3.75 | 3.84 | 4.18 | 4.15 | 4.16 | 3.93 |
| TC0901054 | RFK                        | 55312  | riboflavin kinase /// Riboflavin kinase (l | 2.20E-05 | 2 | 2.97 | 3.28 | 3.42 | 3.46 | 3.56 | 3.42 | 3.43 | 3.42 |
| TC0401144 | RG9MTD2                    | 93587  | RNA (guanine-9-) methyltransferase do      | 0.000173 | 2 | 3.86 | 4.09 | 4.24 | 4.31 | 4.26 | 4.25 | 4.25 | 4.21 |
| TC1001312 | RGS10                      | 6001   | regulator of G-protein signaling 10 /// f  | 6.89E-05 | 2 | 5.36 | 5.35 | 5.21 | 5.72 | 6.03 | 6.10 | 5.93 | 5.97 |
| TC0701773 | RHEB                       | 6009   | Ras homolog enriched in brain              | 9.30E-12 | 2 | 5.07 | 5.43 | 5.68 | 5.74 | 5.83 | 5.89 | 5.91 | 5.84 |
| TC1201663 | RILPL2                     | 196383 | Rab interacting lysosomal protein-like 2   | 4.18E-08 | 2 | 7.88 | 8.27 | 8.23 | 8.47 | 8.49 | 8.45 | 8.53 | 8.49 |
| TC0600052 | RIOK1                      | 83732  | RIO kinase 1 (yeast)                       | 3.85E-06 | 2 | 4.06 | 4.67 | 4.75 | 4.98 | 5.09 | 5.15 | 5.31 | 4.93 |
| TC0900338 | RMI1                       | 80010  | RMI1, RecQ mediated genome instabili       | 1.72E-05 | 2 | 5.86 | 5.89 | 6.20 | 6.08 | 6.05 | 6.11 | 6.09 | 6.16 |
| TC1400040 | RNASE2                     | 6036   | ribonuclease, RNase A family, 2 (liver, e  | 2.37E-21 | 2 | 5.56 | 6.90 | 6.46 | 8.52 | 8.98 | 9.23 | 9.05 | 8.50 |
| TC1400038 | RNASE3                     | 6037   | ribonuclease, RNase A family, 3 (eosinc    | 1.63E-16 | 2 | 5.17 | 6.58 | 5.77 | 7.20 | 7.98 | 8.22 | 7.87 | 7.36 |
| TC1900221 | RNASEH2A                   | 10535  | ribonuclease H2, subunit A                 | 1.25E-07 | 2 | 4.64 | 4.61 | 4.63 | 4.90 | 5.10 | 5.07 | 5.13 | 4.91 |
| TC1300154 | RNASEH2B                   | 79621  | ribonuclease H2, subunit B /// Ribonuc     | 9.27E-11 | 2 | 3.81 | 3.90 | 4.09 | 4.40 | 4.48 | 4.59 | 4.59 | 4.56 |
| TC1101550 | RNASEH2C                   | 84153  | ribonuclease H2, subunit C                 | 3.04E-05 | 2 | 5.04 | 5.14 | 5.05 | 5.15 | 5.44 | 5.41 | 5.24 | 5.09 |
| TC0X01192 | RNF113A                    | 7737   | ring finger protein 113A                   | 2.75E-06 | 2 | 4.72 | 4.72 | 4.78 | 4.93 | 4.89 | 4.87 | 5.09 | 4.96 |
| TC0100937 | RNF115                     | 27246  | ring finger protein 115                    | 2.54E-07 | 2 | 4.46 | 4.73 | 4.76 | 4.96 | 5.02 | 4.96 | 5.09 | 4.93 |
| TC0200414 | RNF181                     | 51255  | ring finger protein 181                    | 6.20E-08 | 2 | 7.68 | 8.16 | 8.23 | 8.31 | 8.21 | 8.29 | 8.29 | 8.33 |
| TC0600698 | RNF217                     | 154214 | ring finger protein 217 /// IBR domain-c   | 0.000138 | 2 | 2.89 | 3.32 | 3.33 | 3.34 | 3.58 | 3.42 | 3.40 | 3.22 |
| TC1300563 | RNF219                     | 79596  | ring finger protein 219                    | 1.50E-08 | 2 | 4.66 | 5.42 | 5.59 | 5.54 | 5.65 | 5.67 | 5.69 | 5.51 |
| TC0100484 | RNF220 /// C1c             | 55182  | ring finger protein 220 /// RING finger p  | 0.000914 | 2 | 4.95 | 4.91 | 4.92 | 5.03 | 5.06 | 4.98 | 5.05 | 4.98 |
| TC1200764 | RNF34                      | 80196  | ring finger protein 34                     | 0.000363 | 2 | 6.91 | 6.75 | 6.93 | 7.10 | 7.02 | 7.10 | 7.04 | 7.00 |
| TC1701553 | RNF43 /// SUP <sup>5</sup> | 54894  | ring finger protein 43 /// suppressor of   | 0.000201 | 2 | 5.55 | 5.60 | 5.69 | 5.70 | 5.68 | 5.71 | 5.69 | 5.72 |
| TC0600359 | RNF8                       | 9025   | ring finger protein 8                      | 7.80E-06 | 2 | 3.58 | 3.70 | 3.69 | 3.84 | 4.05 | 3.91 | 3.98 | 3.86 |
| TC1600767 | RNPS1                      | 731091 | RNA binding protein S1, serine-rich dor    | 0.000182 | 2 | 5.56 | 5.60 | 5.61 | 5.70 | 5.75 | 5.72 | 5.74 | 5.67 |
| TC0500439 | RNUXA                      | 51808  | RNA U, small nuclear RNA export adapt      | 7.01E-05 | 2 | 5.58 | 6.00 | 6.07 | 6.16 | 6.12 | 6.14 | 6.28 | 6.14 |
| TC1300541 | RP11-11C5.2                | 440145 | similar to RIKEN cDNA 2410129H14           | 2.35E-09 | 2 | 4.21 | 4.48 | 4.43 | 4.76 | 4.93 | 4.97 | 5.07 | 4.93 |
| TC0101134 | RP11-336K24.9              | 28956  | mitogen-activated protein-binding prot     | 1.30E-13 | 2 | 5.30 | 5.49 | 5.82 | 6.05 | 5.93 | 5.80 | 5.89 | 5.78 |
| TC0102490 | RP11-556K13.1              | 730029 | 40S ribosomal protein SA pseudogene        | 0.000197 | 2 | 4.36 | 4.66 | 4.60 | 4.96 | 5.25 | 5.26 | 5.10 | 4.91 |
| TC0101027 | RP11-68I18.1 /             | 126626 | hypothetical protein MGC29891 /// GA       | 9.75E-06 | 2 | 4.81 | 4.91 | 4.97 | 5.20 | 5.14 | 5.11 | 5.26 | 5.07 |

|           |                          |                                              |          |   |       |       |       |       |       |       |       |       |
|-----------|--------------------------|----------------------------------------------|----------|---|-------|-------|-------|-------|-------|-------|-------|-------|
| TC0701116 | RP9 /// XIAP // 6100 /// | retinitis pigmentosa 9 (autosomal dom        | 0.000617 | 2 | 4.71  | 4.84  | 4.84  | 4.86  | 4.91  | 4.87  | 4.96  | 4.86  |
| TC0701012 | RPA3                     | 6119 replication protein A3, 14kDa           | 0.000113 | 2 | 4.36  | 4.38  | 4.40  | 4.40  | 4.52  | 4.60  | 4.67  | 4.59  |
| TC0100724 | RPAP2                    | 79871 RNA polymerase II associated protein 2 | 7.87E-08 | 2 | 3.71  | 3.97  | 4.00  | 4.09  | 4.25  | 4.18  | 4.22  | 4.04  |
| TC0600333 | RPL10A                   | 4736 ribosomal protein L10a                  | 6.37E-10 | 2 | 4.98  | 5.50  | 5.19  | 5.73  | 5.81  | 5.85  | 5.91  | 5.59  |
| TC0100255 | RPL11                    | 6135 ribosomal protein L11                   | 6.72E-05 | 2 | 8.54  | 8.74  | 8.74  | 8.83  | 8.87  | 8.98  | 9.05  | 8.95  |
| TC0901340 | RPL12                    | 652036 // ribosomal protein L12              | 1.60E-07 | 2 | 7.27  | 7.29  | 7.12  | 7.50  | 7.63  | 7.64  | 7.76  | 7.49  |
| TC1600684 | RPL13 /// SNOI           | 6137 ribosomal protein L13 /// small nucleol | 0.000116 | 2 | 5.06  | 5.10  | 5.03  | 5.24  | 5.35  | 5.27  | 5.33  | 5.16  |
| TC0300183 | RPL14                    | 9045 ribosomal protein L14                   | 8.65E-08 | 2 | 7.98  | 8.29  | 8.30  | 8.62  | 8.67  | 8.68  | 8.79  | 8.63  |
| TC0300107 | RPL15                    | 730925 // ribosomal protein L15              | 1.15E-10 | 2 | 6.42  | 7.13  | 7.03  | 7.53  | 7.75  | 7.71  | 7.61  | 7.33  |
| TC1901655 | RPL18                    | 6141 ribosomal protein L18                   | 5.95E-07 | 2 | 6.99  | 7.19  | 7.15  | 7.49  | 7.60  | 7.54  | 7.58  | 7.36  |
| TC1900309 | RPL18A                   | 6142 ribosomal protein L18a                  | 3.72E-09 | 2 | 6.81  | 7.21  | 6.87  | 7.70  | 7.83  | 7.80  | 7.71  | 7.52  |
| TC0301746 | RPL22L1                  | 200916 ribosomal protein L22-like 1          | 3.29E-06 | 2 | 3.22  | 3.94  | 3.87  | 3.84  | 3.99  | 4.11  | 4.14  | 4.00  |
| TC1701283 | RPL23                    | 9349 ribosomal protein L23 /// 60S ribosom   | 7.73E-09 | 2 | 5.68  | 6.05  | 6.01  | 6.20  | 6.25  | 6.28  | 6.34  | 6.15  |
| TC1700305 | RPL23A                   | 732089 // ribosomal protein L23a             | 5.59E-08 | 2 | 8.62  | 8.67  | 8.36  | 8.99  | 9.10  | 9.20  | 9.23  | 9.00  |
| TC0301409 | RPL24                    | 6152 ribosomal protein L24                   | 1.93E-07 | 2 | 8.85  | 9.38  | 9.29  | 9.69  | 9.78  | 9.79  | 9.78  | 9.61  |
| TC1701013 | RPL26                    | 730343 // ribosomal protein L26              | 2.36E-07 | 2 | 5.18  | 5.39  | 5.35  | 5.58  | 5.65  | 5.64  | 5.65  | 5.55  |
| TC1100152 | RPL27A                   | 6157 ribosomal protein L27a                  | 1.04E-08 | 2 | 8.80  | 9.08  | 9.08  | 9.28  | 9.41  | 9.39  | 9.42  | 9.32  |
| TC0301247 | RPL29                    | 6159 ribosomal protein L29                   | 1.67E-06 | 2 | 3.86  | 3.99  | 3.93  | 4.17  | 4.37  | 4.27  | 4.30  | 4.13  |
| TC0801141 | RPL30                    | 6156 ribosomal protein L30                   | 0.000172 | 2 | 6.92  | 7.07  | 7.09  | 7.27  | 7.25  | 7.39  | 7.40  | 7.34  |
| TC0301023 | RPL32                    | 652162 // ribosomal protein L32              | 1.58E-09 | 2 | 5.02  | 5.03  | 4.92  | 5.19  | 5.29  | 5.25  | 5.37  | 5.22  |
| TC0400450 | RPL34                    | 731916 // ribosomal protein L34              | 3.74E-18 | 2 | 6.67  | 7.11  | 7.16  | 7.43  | 7.40  | 7.49  | 7.57  | 7.46  |
| TC0901326 | RPL35                    | 11224 ribosomal protein L35 /// 60S ribosom  | 0.000257 | 2 | 3.99  | 4.09  | 3.93  | 4.25  | 4.42  | 4.34  | 4.31  | 4.11  |
| TC0300948 | RPL35A                   | 651825 // ribosomal protein L35a             | 0.000498 | 2 | 7.69  | 7.81  | 7.80  | 7.94  | 8.07  | 8.08  | 8.06  | 8.00  |
| TC1900106 | RPL36                    | 651453 // ribosomal protein L36              | 0.000115 | 2 | 5.84  | 6.00  | 5.91  | 6.11  | 6.21  | 6.16  | 6.25  | 6.07  |
| TC1400829 | RPL36AL                  | 6166 ribosomal protein L36a-like             | 2.35E-06 | 2 | 9.50  | 9.81  | 9.86  | 9.92  | 9.93  | 9.95  | 10.01 | 10.03 |
| TC0500942 | RPL37                    | 6167 ribosomal protein L37 /// 60S ribosom   | 9.55E-10 | 2 | 5.97  | 6.10  | 6.14  | 6.37  | 6.36  | 6.33  | 6.40  | 6.28  |
| TC0201085 | RPL37A                   | 6168 ribosomal protein L37a                  | 4.95E-10 | 2 | 3.83  | 4.13  | 4.16  | 4.40  | 4.40  | 4.39  | 4.43  | 4.29  |
| TC1700735 | RPL38                    | 6169 ribosomal protein L38                   | 1.04E-09 | 2 | 10.25 | 10.60 | 10.55 | 10.85 | 10.87 | 10.92 | 10.96 | 10.84 |
| TC0X01189 | RPL39                    | 6170 ribosomal protein L39                   | 1.93E-08 | 2 | 9.84  | 10.39 | 10.40 | 10.49 | 10.63 | 10.57 | 10.55 | 10.49 |
| TC1501055 | RPL4 /// SNORI           | 6124 ribosomal protein L4 /// small nucleola | 2.01E-05 | 2 | 4.15  | 4.31  | 4.17  | 4.43  | 4.61  | 4.61  | 4.62  | 4.40  |
| TC0500188 | RPL41                    | 6171 ribosomal protein L41                   | 5.91E-08 | 2 | 9.82  | 10.11 | 10.24 | 10.35 | 10.47 | 10.48 | 10.53 | 10.57 |
| TC1200579 | RPL41                    | 6171 ribosomal protein L41                   | 1.31E-06 | 2 | 4.22  | 4.72  | 4.87  | 4.91  | 4.89  | 5.05  | 4.96  | 5.11  |
| TC0801032 | RPL7                     | 6129 ribosomal protein L7                    | 8.30E-07 | 2 | 8.66  | 9.26  | 9.17  | 9.46  | 9.56  | 9.59  | 9.60  | 9.38  |
| TC0801346 | RPL8                     | 6132 ribosomal protein L8                    | 3.16E-09 | 2 | 6.99  | 7.57  | 7.29  | 7.84  | 7.94  | 7.90  | 7.86  | 7.72  |

|           |                |                                                   |          |   |      |       |       |       |       |       |       |       |
|-----------|----------------|---------------------------------------------------|----------|---|------|-------|-------|-------|-------|-------|-------|-------|
| TC0400888 | RPL9           | 6133 ribosomal protein L9                         | 6.45E-06 | 2 | 7.62 | 8.04  | 8.03  | 8.18  | 8.31  | 8.32  | 8.34  | 8.17  |
| TC1201618 | RPLP0          | 6175 ribosomal protein, large, P0 /// 60S ac      | 3.43E-07 | 2 | 5.08 | 5.72  | 5.49  | 6.10  | 6.35  | 6.30  | 6.18  | 5.77  |
| TC1500438 | RPLP1          | 731613 // ribosomal protein, large, P1            | 7.57E-10 | 2 | 8.21 | 8.80  | 8.69  | 9.03  | 9.23  | 9.17  | 9.21  | 8.99  |
| TC1100025 | RPLP2          | 6181 ribosomal protein, large, P2                 | 3.97E-09 | 2 | 9.91 | 10.46 | 10.41 | 10.65 | 10.70 | 10.70 | 10.65 | 10.55 |
| TC2000241 | RPN2           | 6185 ribophorin II /// Dolichyl-diphosphoolig     | 1.83E-08 | 2 | 4.92 | 5.24  | 5.31  | 5.58  | 5.76  | 5.67  | 5.75  | 5.50  |
| TC1000437 | RPP30          | 10556 ribonuclease P/MRP 30kDa subunit ///        | 0.000795 | 2 | 3.88 | 4.09  | 4.09  | 4.12  | 4.21  | 4.24  | 4.28  | 4.19  |
| TC1901492 | RPS16          | 6217 ribosomal protein S16 /// 40S ribosom        | 1.86E-10 | 2 | 8.73 | 9.15  | 9.15  | 9.53  | 9.62  | 9.57  | 9.57  | 9.44  |
| TC1501175 | RPS17          | 6218 ribosomal protein S17                        | 5.78E-09 | 2 | 7.84 | 8.19  | 8.22  | 8.38  | 8.49  | 8.52  | 8.48  | 8.37  |
| TC1501183 | RPS17          | 6218 ribosomal protein S17                        | 3.49E-07 | 2 | 8.02 | 8.29  | 8.28  | 8.45  | 8.53  | 8.55  | 8.49  | 8.40  |
| TC1900562 | RPS19          | 731572 // ribosomal protein S19                   | 7.63E-09 | 2 | 7.48 | 8.06  | 8.00  | 8.52  | 8.64  | 8.50  | 8.55  | 8.31  |
| TC2200683 | RPS19BP1       | 91582 ribosomal protein S19 binding protein :     | 0.000448 | 2 | 5.60 | 5.89  | 5.91  | 5.97  | 6.00  | 6.01  | 6.06  | 5.99  |
| TC0800947 | RPS20          | 6224 ribosomal protein S20                        | 2.52E-07 | 2 | 5.05 | 5.38  | 5.35  | 5.46  | 5.58  | 5.59  | 5.56  | 5.50  |
| TC2000432 | RPS21          | 6227 ribosomal protein S21 /// 40S ribosom        | 4.64E-11 | 2 | 7.34 | 7.82  | 7.80  | 8.11  | 8.26  | 8.24  | 8.20  | 8.05  |
| TC0501118 | RPS23          | 6228 ribosomal protein S23                        | 1.71E-06 | 2 | 6.71 | 7.23  | 7.21  | 7.41  | 7.45  | 7.55  | 7.51  | 7.38  |
| TC1101887 | RPS25          | 6230 ribosomal protein S25                        | 0.000166 | 2 | 9.81 | 9.85  | 9.86  | 10.00 | 10.06 | 10.15 | 10.23 | 10.15 |
| TC0200249 | RPS27A         | 732088 // ribosomal protein S27a                  | 9.38E-07 | 2 | 7.77 | 7.80  | 7.84  | 7.96  | 7.97  | 8.04  | 8.12  | 8.06  |
| TC1501018 | RPS27L         | 51065 ribosomal protein S27-like /// 40S ribos    | 7.69E-11 | 2 | 4.44 | 4.96  | 5.06  | 5.20  | 5.36  | 5.37  | 5.36  | 5.24  |
| TC1900147 | RPS28          | 6234 ribosomal protein S28                        | 4.88E-07 | 2 | 8.27 | 8.66  | 8.46  | 8.81  | 8.92  | 8.89  | 8.88  | 8.77  |
| TC1400826 | RPS29 /// QOP  | 647361 // ribosomal protein S29 /// RPS29 protei  | 6.90E-07 | 2 | 6.36 | 6.82  | 6.91  | 7.16  | 7.25  | 7.19  | 7.23  | 7.10  |
| TC1100672 | RPS3           | 6188 ribosomal protein S3                         | 1.07E-06 | 2 | 9.43 | 9.70  | 9.67  | 9.97  | 10.00 | 10.03 | 10.09 | 9.90  |
| TC0400597 | RPS3A          | 6189 ribosomal protein S3A                        | 5.54E-08 | 2 | 9.80 | 10.30 | 10.39 | 10.48 | 10.50 | 10.56 | 10.57 | 10.46 |
| TC0X01020 | RPS4X          | 6191 ribosomal protein S4, X-linked /// 40S r     | 1.86E-07 | 2 | 7.79 | 8.12  | 8.03  | 8.42  | 8.52  | 8.49  | 8.46  | 8.27  |
| TC1900960 | RPS5           | 6193 ribosomal protein S5                         | 5.88E-08 | 2 | 6.18 | 6.50  | 6.26  | 6.96  | 7.08  | 7.06  | 7.12  | 6.88  |
| TC0900801 | RPS6           | 6194 ribosomal protein S6 /// 40S ribosomal       | 3.15E-09 | 2 | 8.66 | 8.90  | 8.91  | 9.16  | 9.19  | 9.25  | 9.30  | 9.10  |
| TC0200009 | RPS7           | 6201 ribosomal protein S7                         | 0.000168 | 2 | 4.33 | 4.32  | 4.35  | 4.41  | 4.50  | 4.46  | 4.55  | 4.42  |
| TC0100488 | RPS8 /// SNORI | 642115 // ribosomal protein S8 /// small nucleola | 1.33E-06 | 2 | 4.03 | 4.26  | 4.30  | 4.44  | 4.55  | 4.49  | 4.55  | 4.43  |
| TC0201100 | RQCD1          | 9125 RCD1 required for cell differentiation1      | 0.000276 | 2 | 5.15 | 5.28  | 5.31  | 5.41  | 5.44  | 5.48  | 5.45  | 5.38  |
| TC0102138 | RRAGC          | 64121 Ras-related GTP binding C                   | 1.23E-06 | 2 | 6.74 | 7.03  | 7.15  | 7.18  | 7.11  | 7.35  | 7.32  | 7.32  |
| TC0601453 | RRAGD          | 58528 Ras-related GTP binding D /// Ras-relat     | 8.24E-07 | 2 | 7.12 | 7.66  | 7.65  | 7.83  | 7.83  | 8.01  | 7.88  | 7.81  |
| TC1100074 | RRM1           | 6240 ribonucleotide reductase M1                  | 2.56E-11 | 2 | 3.34 | 3.54  | 3.37  | 3.93  | 4.40  | 4.36  | 4.24  | 3.85  |
| TC0200033 | RRM2           | 6241 ribonucleotide reductase M2 polypepti        | 3.35E-13 | 2 | 4.11 | 4.88  | 4.50  | 5.33  | 6.03  | 5.93  | 5.48  | 5.03  |
| TC1600863 | RSL1D1         | 26156 ribosomal L1 domain containing 1 /// R      | 8.71E-10 | 2 | 4.08 | 4.62  | 4.41  | 5.05  | 5.23  | 5.16  | 5.47  | 5.10  |
| TC1600470 | RSPRY1         | 89970 ring finger and SPRY domain containin       | 0.000165 | 2 | 5.28 | 5.63  | 5.55  | 5.62  | 5.47  | 5.73  | 5.76  | 5.74  |
| TC1000794 | RSU1           | 6251 Ras suppressor protein 1 /// Ras suppre      | 6.64E-09 | 2 | 6.79 | 7.65  | 7.64  | 7.78  | 7.98  | 7.90  | 7.63  | 7.53  |

|           |                 |        |                                            |          |   |      |      |      |      |      |      |      |      |
|-----------|-----------------|--------|--------------------------------------------|----------|---|------|------|------|------|------|------|------|------|
| TC0601493 | RTN4IP1         | 84816  | reticulon 4 interacting protein 1          | 7.87E-06 | 2 | 3.82 | 3.85 | 3.79 | 3.95 | 4.17 | 4.08 | 4.13 | 3.95 |
| TC0500771 | RUFY1           | 80230  | RUN and FYVE domain containing 1 ///       | 4.22E-06 | 2 | 6.22 | 6.13 | 6.17 | 6.53 | 6.51 | 6.62 | 6.64 | 6.53 |
| TC1900695 | RUVBL2          | 10856  | RuvB-like 2 (E. coli)                      | 0.000768 | 2 | 4.90 | 5.00 | 4.93 | 5.04 | 5.18 | 5.10 | 5.12 | 5.01 |
| TC2100261 | RWDD2B          | 10069  | RWD domain containing 2B                   | 0.000105 | 2 | 3.69 | 3.67 | 3.69 | 3.91 | 3.92 | 3.88 | 4.00 | 3.81 |
| TC0301583 | RYK             | 6259   | RYK receptor-like tyrosine kinase          | 7.83E-05 | 2 | 4.61 | 4.86 | 4.79 | 4.93 | 4.99 | 4.92 | 5.00 | 4.99 |
| TC0102787 | S100A4          | 6275   | S100 calcium binding protein A4            | 1.78E-11 | 2 | 6.42 | 6.50 | 6.50 | 6.99 | 6.90 | 6.75 | 6.65 | 6.62 |
| TC1101238 | SAAL1           | 113174 | serum amyloid A-like 1                     | 1.29E-10 | 2 | 3.33 | 3.63 | 3.54 | 3.93 | 4.18 | 4.15 | 4.14 | 3.99 |
| TC1900666 | SAE1            | 10055  | SUMO1 activating enzyme subunit 1          | 4.95E-07 | 2 | 4.90 | 4.95 | 4.90 | 5.07 | 5.27 | 5.37 | 5.32 | 5.20 |
| TC2200344 | SAMM50          | 25813  | sorting and assembly machinery compo       | 9.93E-06 | 2 | 4.13 | 4.28 | 4.31 | 4.43 | 4.53 | 4.47 | 4.65 | 4.42 |
| TC1300017 | SAP18           | 10284  | Sin3A-associated protein, 18kDa            | 1.61E-06 | 2 | 7.76 | 7.96 | 8.12 | 8.12 | 8.06 | 8.14 | 8.18 | 8.21 |
| TC0100798 | SARS            | 6301   | seryl-tRNA synthetase /// Seryl-tRNA sy    | 0.000772 | 2 | 5.67 | 5.90 | 5.90 | 6.05 | 5.98 | 5.98 | 6.06 | 5.98 |
| TC1400847 | SAV1            | 646561 | // salvador homolog 1 (Drosophila)         | 0.000159 | 2 | 3.67 | 4.01 | 3.90 | 4.11 | 4.30 | 4.19 | 4.10 | 4.12 |
| TC0500294 | SCAMP1          | 9522   | secretory carrier membrane protein 1 /     | 0.000326 | 2 | 5.45 | 5.38 | 5.53 | 5.69 | 5.56 | 5.66 | 5.80 | 5.76 |
| TC0401059 | SCARB2          | 950    | scavenger receptor class B, member 2       | 2.44E-06 | 2 | 4.39 | 4.69 | 4.73 | 4.91 | 4.92 | 5.03 | 5.25 | 5.21 |
| TC1000509 | SCD             | 6319   | stearoyl-CoA desaturase (delta-9-desat     | 5.60E-11 | 2 | 3.74 | 4.20 | 4.02 | 4.54 | 4.98 | 5.06 | 4.99 | 4.47 |
| TC0400949 | SCFD2           | 152579 | sec1 family domain containing 2            | 0.000333 | 2 | 3.58 | 3.85 | 3.82 | 3.88 | 4.09 | 4.25 | 4.17 | 4.06 |
| TC0400557 | SCOC            | 60592  | short coiled-coil protein /// short coilec | 6.52E-07 | 2 | 3.59 | 3.75 | 3.87 | 3.86 | 4.00 | 3.90 | 3.90 | 3.96 |
| TC0400444 | SCYE1           | 9255   | small inducible cytokine subfamily E, m    | 5.18E-05 | 2 | 5.20 | 5.70 | 5.68 | 5.82 | 5.87 | 5.85 | 5.94 | 5.84 |
| TC0401053 | SDAD1           | 55153  | SDA1 domain containing 1                   | 2.43E-07 | 2 | 3.15 | 3.33 | 3.31 | 3.60 | 3.68 | 3.66 | 3.82 | 3.63 |
| TC0101670 | SDCCAG8         | 10806  | serologically defined colon cancer antiq   | 5.55E-14 | 2 | 5.01 | 5.52 | 5.91 | 6.10 | 6.01 | 5.90 | 5.88 | 5.72 |
| TC0101930 | SDHB            | 6390   | succinate dehydrogenase complex, sub       | 0.000392 | 2 | 7.71 | 7.77 | 7.97 | 8.21 | 7.99 | 7.99 | 8.00 | 8.04 |
| TC0202184 | SDPR            | 8436   | serum deprivation response (phosphat       | 1.92E-05 | 2 | 3.61 | 4.49 | 4.11 | 4.97 | 5.37 | 5.64 | 5.27 | 5.36 |
| TC1501204 | SEC11A          | 23478  | SEC11 homolog A (S. cerevisiae)            | 7.09E-05 | 2 | 6.95 | 7.18 | 7.42 | 7.44 | 7.44 | 7.40 | 7.33 | 7.35 |
| TC1800218 | SEC11C          | 90701  | SEC11 homolog C (S. cerevisiae)            | 3.26E-06 | 2 | 4.48 | 5.07 | 5.17 | 5.43 | 5.63 | 5.64 | 5.65 | 5.36 |
| TC0401214 | SEC24D          | 9871   | SEC24 related gene family, member D (      | 0.000243 | 2 | 5.56 | 5.69 | 5.76 | 5.76 | 5.55 | 5.72 | 5.88 | 5.90 |
| TC0401084 | SEC31A          | 22872  | SEC31 homolog A (S. cerevisiae) /// SEC    | 6.79E-05 | 2 | 5.36 | 5.57 | 5.42 | 5.71 | 5.77 | 5.83 | 5.85 | 5.73 |
| TC1800070 | SEH1L           | 81929  | SEH1-like (S. cerevisiae)                  | 2.43E-05 | 2 | 3.64 | 3.96 | 3.81 | 4.04 | 4.24 | 4.26 | 4.25 | 3.98 |
| TC0301272 | SELK            | 58515  | selenoprotein K                            | 0.000108 | 2 | 8.05 | 8.42 | 8.19 | 8.30 | 8.29 | 8.51 | 8.52 | 8.62 |
| TC1501280 | SELS /// SELS_F | 55829  | selenoprotein S /// Selenoprotein S (VC    | 1.57E-08 | 2 | 4.41 | 4.57 | 4.38 | 4.66 | 4.79 | 4.79 | 4.83 | 4.78 |
| TC0501231 | SEMA6A          | 57556  | sema domain, transmembrane domain          | 6.30E-05 | 2 | 2.76 | 2.84 | 2.77 | 2.77 | 3.02 | 3.01 | 2.94 | 2.83 |
| TC1201143 | SENP1           | 29843  | SUMO1/sentrin specific peptidase 1 ///     | 0.000401 | 2 | 5.11 | 5.47 | 5.48 | 5.45 | 5.36 | 5.53 | 5.60 | 5.59 |
| TC1000774 | SEPHS1          | 22929  | selenophosphate synthetase 1 /// Sele      | 1.22E-06 | 2 | 4.94 | 5.13 | 5.15 | 5.37 | 5.58 | 5.44 | 5.52 | 5.22 |
| TC0100276 | SEPN1           | 57190  | selenoprotein N, 1 /// Selenoprotein N     | 5.22E-05 | 2 | 5.21 | 5.21 | 5.20 | 5.35 | 5.42 | 5.38 | 5.41 | 5.39 |
| TC0102339 | SERBP1          | 26135  | SERPINE1 mRNA binding protein 1            | 1.56E-13 | 2 | 7.27 | 7.59 | 7.84 | 8.06 | 8.09 | 8.05 | 8.11 | 7.91 |



|           |           |        |                                            |          |   |      |      |      |      |      |      |      |      |
|-----------|-----------|--------|--------------------------------------------|----------|---|------|------|------|------|------|------|------|------|
| TC0500248 | SERF1A    | 8293   | small EDRK-rich factor 1A (telomeric)      | 7.99E-07 | 2 | 5.55 | 5.79 | 5.53 | 5.44 | 5.72 | 5.76 | 5.69 | 5.64 |
| TC0500243 | SERF1B    | 728492 | small EDRK-rich factor 1B (centromeric)    | 1.48E-05 | 2 | 5.31 | 5.71 | 5.41 | 5.40 | 5.61 | 5.62 | 5.60 | 5.52 |
| TC1800240 | SERPINB10 | 5273   | serpin peptidase inhibitor, clade B (ova)  | 1.18E-12 | 2 | 2.74 | 5.20 | 4.24 | 5.05 | 5.76 | 5.76 | 5.20 | 4.35 |
| TC0600906 | SERPINB6  | 5269   | serpin peptidase inhibitor, clade B (ova)  | 5.32E-06 | 2 | 5.25 | 5.42 | 5.52 | 5.54 | 5.55 | 5.56 | 5.53 | 5.46 |
| TC0401273 | SETD7     | 80854  | SET domain containing (lysine methyltr     | 8.07E-15 | 2 | 3.90 | 4.07 | 4.24 | 5.00 | 4.83 | 4.63 | 4.46 | 4.35 |
| TC1300143 | SETDB2    | 83852  | SET domain, bifurcated 2                   | 1.22E-07 | 2 | 3.39 | 3.36 | 3.57 | 3.61 | 3.64 | 3.75 | 3.88 | 3.75 |
| TC1600566 | SF3B3     | 23450  | splicing factor 3b, subunit 3, 130kDa      | 8.32E-07 | 2 | 4.83 | 4.73 | 4.71 | 5.03 | 5.15 | 5.20 | 5.26 | 5.07 |
| TC0601662 | SF3B5     | 83443  | splicing factor 3b, subunit 5, 10kDa       | 1.11E-09 | 2 | 6.13 | 6.36 | 6.55 | 6.77 | 6.88 | 6.80 | 6.87 | 6.75 |
| TC0301263 | SFMBT1    | 51460  | Scm-like with four mbt domains 1           | 0.00052  | 2 | 4.19 | 4.17 | 4.18 | 4.25 | 4.32 | 4.32 | 4.42 | 4.37 |
| TC0301054 | SGOL1     | 151648 | shugoshin-like 1 (S. pombe)                | 3.25E-06 | 2 | 3.78 | 4.22 | 4.00 | 4.29 | 4.64 | 4.55 | 4.45 | 4.32 |
| TC0200973 | SGOL2     | 151246 | shugoshin-like 2 (S. pombe)                | 8.13E-05 | 2 | 2.71 | 2.89 | 2.89 | 3.02 | 3.17 | 3.12 | 3.24 | 3.02 |
| TC0600522 | SH3BGR2   | 83699  | SH3 domain binding glutamic acid-rich      | 1.39E-06 | 2 | 3.61 | 4.52 | 4.17 | 5.55 | 5.89 | 6.06 | 5.74 | 5.61 |
| TC0201264 | SH3YL1    | 26751  | SH3 domain containing, Ysc84-like 1 (S.    | 0.000591 | 2 | 3.21 | 3.23 | 3.21 | 3.27 | 3.34 | 3.26 | 3.37 | 3.28 |
| TC1601070 | SHCBP1    | 79801  | SHC SH2-domain binding protein 1           | 0.000364 | 2 | 2.88 | 3.00 | 2.98 | 3.09 | 3.45 | 3.31 | 3.23 | 3.10 |
| TC0301180 | SHISA5    | 51246  | shisa homolog 5 (Xenopus laevis)           | 2.46E-05 | 2 | 7.92 | 7.91 | 8.04 | 8.24 | 8.19 | 8.22 | 8.22 | 8.30 |
| TC1200445 | SHMT2     | 6472   | serine hydroxymethyltransferase 2 (mit     | 0.000762 | 2 | 4.62 | 4.66 | 4.63 | 4.72 | 4.84 | 4.82 | 4.85 | 4.75 |
| TC1101938 | SIAE      | 54414  | sialic acid acetyltransferase              | 0.000996 | 2 | 4.02 | 4.06 | 4.13 | 4.31 | 4.42 | 4.30 | 4.12 | 4.10 |
| TC0301662 | SIAH2     | 732092 | seven in absentia homolog 2 (Drosophi      | 3.52E-12 | 2 | 4.46 | 4.76 | 4.82 | 5.18 | 5.15 | 5.08 | 5.10 | 5.08 |
| TC1400188 | SIP1      | 8487   | survival of motor neuron protein intera    | 0.000462 | 2 | 3.00 | 3.10 | 3.12 | 3.12 | 3.26 | 3.23 | 3.38 | 3.24 |
| TC0400209 | SLAIN2    | 57606  | SLAIN motif family, member 2               | 0.000387 | 2 | 7.24 | 7.60 | 7.60 | 7.74 | 7.62 | 7.82 | 7.78 | 7.87 |
| TC0401310 | SLC10A7   | 84068  | solute carrier family 10 (sodium/bile ac   | 8.74E-06 | 2 | 3.38 | 3.46 | 3.70 | 3.71 | 3.72 | 3.65 | 3.71 | 3.58 |
| TC0500448 | SLC12A2   | 6558   | solute carrier family 12 (sodium/potass    | 1.47E-08 | 2 | 3.26 | 3.46 | 3.35 | 3.76 | 4.29 | 4.14 | 4.06 | 3.63 |
| TC0200294 | SLC1A4    | 6509   | solute carrier family 1 (glutamate/neut    | 3.38E-07 | 2 | 3.81 | 4.01 | 3.91 | 4.13 | 4.39 | 4.38 | 4.38 | 4.14 |
| TC0601523 | SLC22A16  | 85413  | solute carrier family 22 (organic cation)  | 1.49E-05 | 2 | 3.26 | 3.35 | 3.37 | 3.41 | 3.60 | 3.61 | 3.50 | 3.35 |
| TC1400451 | SLC24A4   | 123041 | solute carrier family 24 (sodium/potass    | 1.02E-10 | 2 | 4.37 | 4.49 | 4.56 | 4.84 | 4.77 | 4.67 | 4.58 | 4.46 |
| TC1300451 | SLC25A30  | 253512 | solute carrier family 25, member 30        | 1.90E-10 | 2 | 4.72 | 4.89 | 4.99 | 5.51 | 5.31 | 5.62 | 5.70 | 5.57 |
| TC0100097 | SLC25A33  | 84275  | solute carrier family 25, member 33        | 1.81E-06 | 2 | 2.93 | 2.99 | 3.03 | 3.18 | 3.22 | 2.99 | 3.02 | 2.98 |
| TC0X00530 | SLC25A5   | 292    | solute carrier family 25 (mitochondrial    | 3.14E-11 | 2 | 6.03 | 6.68 | 6.54 | 7.06 | 7.21 | 7.08 | 7.06 | 6.87 |
| TC0Y00110 | SLC25A6   | 293    | solute carrier family 25 (mitochondrial    | 3.94E-10 | 2 | 6.10 | 6.84 | 6.73 | 7.22 | 7.27 | 7.14 | 7.10 | 6.92 |
| TC0X00730 | SLC25A6   | 293    | solute carrier family 25 (mitochondrial    | 5.43E-07 | 2 | 7.04 | 7.45 | 7.29 | 7.64 | 7.81 | 7.59 | 7.56 | 7.48 |
| TC1500326 | SLC27A2   | 11001  | solute carrier family 27 (fatty acid trans | 5.19E-09 | 2 | 2.83 | 3.68 | 3.03 | 3.38 | 4.08 | 3.96 | 3.73 | 3.39 |
| TC0901084 | SLC28A3   | 64078  | solute carrier family 28 (sodium-couple    | 1.46E-07 | 2 | 3.39 | 3.61 | 3.62 | 3.93 | 4.33 | 4.18 | 4.20 | 3.85 |
| TC0101834 | SLC2A5    | 6518   | solute carrier family 2 (facilitated gluco | 1.10E-07 | 2 | 4.29 | 4.47 | 4.36 | 4.63 | 4.83 | 4.84 | 4.80 | 4.55 |
| TC0103207 | SLC30A1   | 7779   | solute carrier family 30 (zinc transporte  | 1.90E-17 | 2 | 4.59 | 4.90 | 5.42 | 5.86 | 5.67 | 5.47 | 5.48 | 5.44 |

|           |               |           |                                          |          |   |      |      |      |      |      |       |      |      |
|-----------|---------------|-----------|------------------------------------------|----------|---|------|------|------|------|------|-------|------|------|
| TC0301689 | SLC33A1       | 9197      | solute carrier family 33 (acetyl-CoA tra | 5.28E-06 | 2 | 4.06 | 4.41 | 4.61 | 4.76 | 4.73 | 4.73  | 4.68 | 4.59 |
| TC0100763 | SLC35A3       | 23443     | solute carrier family 35 (UDP-N-acetylgl | 0.000806 | 2 | 3.70 | 3.81 | 3.82 | 3.85 | 3.93 | 3.93  | 3.90 | 3.87 |
| TC0701649 | SLC35B4       | 84912     | solute carrier family 35, member B4      | 3.14E-05 | 2 | 3.73 | 3.82 | 3.92 | 4.01 | 4.10 | 4.03  | 3.98 | 3.74 |
| TC2000797 | SLC35C2       | 51006     | solute carrier family 35, member C2 ///  | 6.39E-08 | 2 | 5.52 | 5.44 | 5.39 | 5.59 | 5.76 | 5.68  | 5.71 | 5.61 |
| TC0901160 | SLC35D2       | 11046     | solute carrier family 35, member D2 ///  | 0.000899 | 2 | 3.00 | 3.36 | 3.29 | 3.27 | 3.42 | 3.31  | 3.40 | 3.30 |
| TC2100153 | SLC37A1       | 54020     | solute carrier family 37 (glycerol-3-pho | 0.000187 | 2 | 4.56 | 4.61 | 4.59 | 4.66 | 4.63 | 4.70  | 4.73 | 4.77 |
| TC1701660 | SLC39A11      | 201266    | solute carrier family 39 (metal ion tran | 1.38E-06 | 2 | 4.93 | 4.87 | 4.76 | 4.96 | 5.18 | 5.20  | 5.15 | 5.00 |
| TC1101412 | SLC43A3       | 29015     | solute carrier family 43, member 3       | 3.78E-05 | 2 | 4.79 | 5.17 | 4.97 | 5.05 | 5.26 | 5.29  | 5.26 | 5.10 |
| TC0900458 | SLC44A1       | 23446     | solute carrier family 44, member 1 ///   | 3.74E-16 | 2 | 5.02 | 5.99 | 5.57 | 5.98 | 6.24 | 6.18  | 6.01 | 5.79 |
| TC0401267 | SLC7A11       | 23657     | solute carrier family 7, (cationic amino | 1.45E-05 | 2 | 2.63 | 2.74 | 2.85 | 2.89 | 2.95 | 3.03  | 3.17 | 2.96 |
| TC0102028 | SLC9A1        | 6548      | solute carrier family 9 (sodium/hydroge  | 4.17E-06 | 2 | 5.03 | 4.90 | 5.11 | 5.37 | 5.26 | 5.11  | 5.05 | 5.07 |
| TC1701235 | SLFN11        | 91607     | schlafen family member 11 /// Schlafer   | 7.66E-05 | 2 | 4.22 | 4.14 | 4.19 | 4.35 | 4.47 | 4.42  | 4.51 | 4.45 |
| TC1701236 | SLFN12        | 55106     | schlafen family member 12                | 7.77E-06 | 2 | 4.29 | 4.40 | 4.73 | 4.96 | 4.87 | 4.98  | 5.11 | 5.09 |
| TC2000770 | SLPI          | 6590      | secretory leukocyte peptidase inhibitor  | 1.87E-17 | 2 | 7.77 | 8.80 | 8.99 | 9.88 | 9.98 | 10.14 | 9.98 | 9.47 |
| TC1800457 | SMAD2         | 4087      | SMAD family member 2 /// Mothers ag      | 1.57E-09 | 2 | 6.59 | 6.88 | 7.09 | 7.03 | 7.04 | 7.08  | 7.06 | 7.02 |
| TC0500498 | SMAD5         | 4090      | SMAD family member 5                     | 3.41E-11 | 2 | 3.70 | 3.76 | 3.82 | 4.33 | 4.30 | 4.29  | 4.50 | 4.34 |
| TC0400407 | SMARCAD1      | 56916     | SWI/SNF-related, matrix-associated act   | 0.000163 | 2 | 3.05 | 3.18 | 3.12 | 3.28 | 3.45 | 3.41  | 3.46 | 3.30 |
| TC0201084 | SMARCAL1      | 50485     | SWI/SNF related, matrix associated, act  | 0.000137 | 2 | 4.32 | 4.32 | 4.46 | 4.50 | 4.46 | 4.41  | 4.48 | 4.46 |
| TC0701767 | SMARCD3       | 6604      | SWI/SNF related, matrix associated, act  | 5.28E-16 | 2 | 5.38 | 5.47 | 5.52 | 6.07 | 6.12 | 6.16  | 6.09 | 5.92 |
| TC0900449 | SMC2          | 10592     | structural maintenance of chromosom      | 7.31E-10 | 2 | 3.42 | 3.69 | 3.51 | 4.10 | 4.63 | 4.53  | 4.53 | 4.02 |
| TC1000577 | SMC3          | 9126      | structural maintenance of chromosom      | 0.000214 | 2 | 6.78 | 6.73 | 6.86 | 7.01 | 7.04 | 7.16  | 7.46 | 7.23 |
| TC0500244 | SMN2          | 6607      | survival of motor neuron 2, centromeri   | 5.27E-06 | 2 | 4.75 | 5.17 | 4.99 | 5.06 | 5.18 | 5.14  | 5.19 | 5.10 |
| TC0500249 | SMN2 /// SMN  | 6607 ///  | survival of motor neuron 2, centromeri   | 0.000163 | 2 | 5.14 | 5.51 | 5.34 | 5.40 | 5.51 | 5.48  | 5.43 | 5.38 |
| TC1201259 | SMUG1         | 23583     | single-strand-selective monofunctional   | 0.000539 | 2 | 5.06 | 5.08 | 5.24 | 5.28 | 5.20 | 5.17  | 5.21 | 5.24 |
| TC2200060 | SNAP29        | 9342      | synaptosomal-associated protein, 29kD    | 5.75E-05 | 2 | 6.83 | 6.97 | 7.15 | 7.23 | 7.15 | 7.12  | 7.28 | 7.21 |
| TC0900068 | SNAPC3        | 6619      | small nuclear RNA activating complex,    | 2.79E-05 | 2 | 4.81 | 4.89 | 5.17 | 5.24 | 5.16 | 5.06  | 5.20 | 4.95 |
| TC0100324 | SNHG3-RCC1 // | 751867 // | SNHG3-RCC1 /// regulator of chromosc     | 0.000266 | 2 | 4.58 | 4.58 | 4.62 | 4.67 | 4.78 | 4.69  | 4.67 | 4.63 |
| TC1600178 | SNN           | 8303      | stannin                                  | 7.84E-05 | 2 | 6.92 | 7.28 | 6.84 | 7.09 | 7.17 | 7.35  | 7.20 | 7.35 |
| TC1900542 | SNRPA         | 6626      | small nuclear ribonucleoprotein polype   | 0.000479 | 2 | 3.97 | 4.10 | 4.02 | 4.24 | 4.41 | 4.26  | 4.41 | 4.16 |
| TC1501281 | SNRPA1        | 6627      | small nuclear ribonucleoprotein polype   | 9.54E-07 | 2 | 3.93 | 3.82 | 3.72 | 4.09 | 4.28 | 4.29  | 4.36 | 4.12 |
| TC2000505 | SNRPB         | 6628      | small nuclear ribonucleoprotein polype   | 0.000458 | 2 | 5.02 | 5.35 | 5.29 | 5.38 | 5.46 | 5.35  | 5.41 | 5.36 |
| TC0600323 | SNRPC         | 6631      | small nuclear ribonucleoprotein polype   | 7.68E-08 | 2 | 4.50 | 4.46 | 4.51 | 4.78 | 4.90 | 4.85  | 5.01 | 4.85 |
| TC1800090 | SNRPD1        | 6632      | small nuclear ribonucleoprotein D1 pol   | 1.45E-11 | 2 | 3.82 | 4.23 | 4.20 | 4.83 | 5.19 | 5.24  | 5.17 | 4.77 |
| TC1901602 | SNRPD2        | 6633      | small nuclear ribonucleoprotein D2 pol   | 0.000567 | 2 | 4.54 | 4.68 | 4.63 | 4.72 | 4.91 | 4.81  | 4.84 | 4.69 |

|           |         |                |                                           |                           |          |       |       |       |       |       |       |       |       |      |
|-----------|---------|----------------|-------------------------------------------|---------------------------|----------|-------|-------|-------|-------|-------|-------|-------|-------|------|
| TC2200140 | SNRPD3  | 6634           | small nuclear ribonucleoprotein D3 pol    | 2.53E-06                  | 2        | 6.26  | 6.88  | 7.01  | 7.04  | 7.04  | 7.09  | 7.13  | 7.00  |      |
| TC0101439 | SNRPE   | 6635           | small nuclear ribonucleoprotein polype    | 1.01E-14                  | 2        | 3.89  | 3.89  | 4.03  | 4.31  | 4.42  | 4.50  | 4.53  | 4.42  |      |
| TC1200604 | SNRPF   | 6636           | small nuclear ribonucleoprotein polype    | 1.58E-10                  | 2        | 5.36  | 6.35  | 6.19  | 6.82  | 7.13  | 7.23  | 7.10  | 6.81  |      |
| TC0201604 | SNRPG   | 6637           | small nuclear ribonucleoprotein polype    | 2.98E-07                  | 2        | 5.88  | 6.29  | 6.38  | 6.49  | 6.52  | 6.59  | 6.59  | 6.53  |      |
| TC0801218 | SNTB1   | 6641           | syntrophin, beta 1 (dystrophin-associat   | 1.10E-15                  | 2        | 5.10  | 4.91  | 4.96  | 5.61  | 5.44  | 5.47  | 5.66  | 5.64  |      |
| TC1501117 | SNUPN   | 10073          | snurportin 1                              | 4.20E-08                  | 2        | 4.88  | 4.92  | 5.04  | 5.17  | 5.27  | 5.12  | 5.23  | 5.03  |      |
| TC1100525 | SNX15   | /// ARL2 29907 | /// sorting nexin 15                      | /// ADP-ribosylation fa   | 1.83E-05 | 2     | 4.36  | 4.62  | 4.66  | 4.71  | 4.78  | 4.70  | 4.69  | 4.61 |
| TC0500429 | SNX2    | 6643           | sorting nexin 2                           | 2.58E-09                  | 2        | 6.63  | 6.59  | 7.01  | 7.05  | 6.76  | 6.92  | 7.10  | 7.05  |      |
| TC0500430 | SNX24   | 28966          | sorting nexin 24                          | 7.18E-05                  | 2        | 3.09  | 3.24  | 3.24  | 3.30  | 3.53  | 3.45  | 3.47  | 3.39  |      |
| TC2000580 | SNX5    | 27131          | sorting nexin 5                           | /// Sorting nexin-5. [Sol | 1.72E-08 | 2     | 4.55  | 4.53  | 4.49  | 4.79  | 4.88  | 4.91  | 5.07  | 4.95 |
| TC1400782 | SNX6    | 58533          | sorting nexin 6                           | 1.85E-05                  | 2        | 7.38  | 7.41  | 7.70  | 7.86  | 7.65  | 7.69  | 7.73  | 7.64  |      |
| TC0600843 | SNX9    | 51429          | sorting nexin 9                           | 0.000448                  | 2        | 3.94  | 4.17  | 4.04  | 4.25  | 4.36  | 4.21  | 4.23  | 4.20  |      |
| TC2100072 | SOD1    | 6647           | superoxide dismutase 1, soluble (amyo     | 1.39E-14                  | 2        | 5.39  | 5.78  | 6.22  | 6.37  | 6.35  | 6.19  | 6.29  | 6.10  |      |
| TC1701170 | SPAG5   | 10615          | sperm associated antigen 5                | 0.000262                  | 2        | 3.60  | 3.67  | 3.61  | 3.74  | 3.99  | 3.92  | 3.87  | 3.73  |      |
| TC0501424 | SPARC   | 6678           | secreted protein, acidic, cysteine-rich ( | 8.04E-05                  | 2        | 5.46  | 5.86  | 5.74  | 6.45  | 6.86  | 6.79  | 6.47  | 6.45  |      |
| TC0400514 | SPATA5  | 166378         | spermatogenesis associated 5              | 9.47E-05                  | 2        | 3.25  | 3.23  | 3.17  | 3.26  | 3.46  | 3.43  | 3.44  | 3.35  |      |
| TC1200305 | SPATS2  | 65244          | spermatogenesis associated, serine-ricl   | 0.000935                  | 2        | 3.27  | 3.29  | 3.31  | 3.39  | 3.47  | 3.41  | 3.42  | 3.35  |      |
| TC0202078 | SPC25   | 57405          | SPC25, NDC80 kinetochore complex co       | 3.41E-07                  | 2        | 3.35  | 3.68  | 3.52  | 3.89  | 4.40  | 4.44  | 4.19  | 3.90  |      |
| TC0300313 | SPCS1   | 28972          | signal peptidase complex subunit 1 hor    | 4.22E-11                  | 2        | 5.28  | 5.72  | 5.84  | 5.90  | 5.87  | 5.92  | 5.96  | 5.89  |      |
| TC0101595 | SPHAR   | /// RAB-10638  | /// S-phase response (cyclin-related)     | /// R/                    | 0.000635 | 2     | 4.35  | 4.91  | 4.89  | 5.21  | 4.97  | 5.15  | 5.27  | 5.23 |
| TC0900361 | SPIN1   | 10927          | spindlin 1                                | 6.45E-06                  | 2        | 5.43  | 5.77  | 5.67  | 5.76  | 5.87  | 5.79  | 5.80  | 5.71  |      |
| TC0X00979 | SPIN4   | 139886         | spindlin family, member 4                 | /// spindlin f            | 1.06E-12 | 2     | 3.88  | 4.13  | 4.15  | 4.69  | 5.07  | 5.11  | 5.11  | 4.86 |
| TC1600313 | SPN     | 6693           | sialophorin (leukosialin, CD43)           | 1.13E-09                  | 2        | 4.02  | 4.42  | 4.20  | 4.53  | 4.92  | 5.00  | 5.00  | 4.68  |      |
| TC0200244 | SPTBN1  | 6711           | spectrin, beta, non-erythrocytic 1        | 6.57E-09                  | 2        | 5.14  | 6.06  | 6.01  | 6.57  | 6.74  | 6.57  | 6.67  | 6.30  |      |
| TC1101246 | SPTY2D1 | 144108         | SPT2, Suppressor of Ty, domain contair    | 0.000278                  | 2        | 5.93  | 6.24  | 6.10  | 6.15  | 6.09  | 6.22  | 6.28  | 6.34  |      |
| TC0800548 | SQLE    | 6713           | squalene epoxidase                        | 6.54E-05                  | 2        | 3.17  | 3.32  | 3.27  | 3.50  | 3.79  | 3.66  | 3.59  | 3.37  |      |
| TC0201482 | SRBD1   | 55133          | S1 RNA binding domain 1                   | 1.24E-05                  | 2        | 4.90  | 5.33  | 5.11  | 5.07  | 4.98  | 5.25  | 5.40  | 5.45  |      |
| TC2200326 | SREBF2  | 6721           | sterol regulatory element binding trans   | 3.97E-05                  | 2        | 4.46  | 4.52  | 4.45  | 4.66  | 4.77  | 4.62  | 4.58  | 4.49  |      |
| TC0500425 | SRFBP1  | 153443         | serum response factor binding protein     | 2.35E-05                  | 2        | 3.80  | 3.96  | 4.01  | 4.17  | 4.31  | 4.24  | 4.35  | 4.25  |      |
| TC1000299 | SRGN    | 5552           | serglycin                                 | 5.24E-06                  | 2        | 10.99 | 11.29 | 11.34 | 11.35 | 11.36 | 11.37 | 11.34 | 11.38 |      |
| TC0400248 | SRP72   | 6731           | signal recognition particle 72kDa         | 3.52E-12                  | 2        | 5.23  | 5.19  | 4.96  | 5.70  | 5.75  | 5.92  | 6.22  | 5.87  |      |
| TC0200845 | SSB     | 6741           | Sjogren syndrome antigen B (autoantig     | 8.30E-08                  | 2        | 5.16  | 5.88  | 5.66  | 6.00  | 6.08  | 6.24  | 6.61  | 6.29  |      |
| TC0700757 | SSBP1   | 6742           | single-stranded DNA binding protein 1     | 9.97E-06                  | 2        | 6.06  | 6.69  | 6.67  | 6.82  | 6.88  | 6.92  | 7.02  | 6.89  |      |
| TC0600935 | SSR1    | 6745           | signal sequence receptor, alpha (transl   | 8.67E-05                  | 2        | 8.10  | 8.43  | 8.52  | 8.52  | 8.43  | 8.54  | 8.53  | 8.55  |      |

|           |               |        |                                          |          |   |      |      |      |      |      |      |      |      |
|-----------|---------------|--------|------------------------------------------|----------|---|------|------|------|------|------|------|------|------|
| TC0301691 | SSR3          | 6747   | signal sequence receptor, gamma (tran    | 3.96E-11 | 2 | 4.60 | 5.20 | 5.59 | 5.60 | 5.57 | 5.54 | 5.54 | 5.44 |
| TC0X00691 | SSR4          | 6748   | signal sequence receptor, delta (transc  | 7.14E-07 | 2 | 4.86 | 5.16 | 5.12 | 5.34 | 5.48 | 5.37 | 5.38 | 5.20 |
| TC1101409 | SSRP1         | 6749   | structure specific recognition protein 1 | 8.81E-07 | 2 | 4.05 | 4.19 | 4.10 | 4.27 | 4.49 | 4.41 | 4.54 | 4.31 |
| TC0102391 | SSX2IP        | 117178 | synovial sarcoma, X breakpoint 2 intera  | 5.22E-07 | 2 | 3.90 | 3.96 | 3.95 | 4.13 | 4.24 | 4.28 | 4.20 | 4.21 |
| TC0300880 | ST6GAL1       | 6480   | ST6 beta-galactosamide alpha-2,6-sialy   | 4.09E-11 | 2 | 5.05 | 4.99 | 4.82 | 5.27 | 5.53 | 5.50 | 5.51 | 5.29 |
| TC0700631 | ST7           | 7982   | suppression of tumorigenicity 7 /// sup  | 0.000406 | 2 | 3.04 | 3.09 | 3.11 | 3.12 | 3.27 | 3.24 | 3.22 | 3.15 |
| TC1000423 | STAMBPL1      | 57559  | STAM binding protein-like 1 /// AMSH-    | 5.24E-05 | 2 | 3.30 | 3.63 | 3.72 | 3.73 | 3.87 | 3.80 | 3.87 | 3.63 |
| TC0501210 | STARD4        | 134429 | StAR-related lipid transfer (START) dom  | 4.77E-06 | 2 | 3.72 | 3.88 | 3.85 | 4.08 | 4.28 | 4.28 | 4.22 | 4.07 |
| TC0201751 | STARD7        | 56910  | StAR-related lipid transfer (START) dom  | 1.06E-11 | 2 | 5.83 | 6.24 | 6.32 | 6.76 | 6.87 | 6.81 | 6.78 | 6.52 |
| TC0400331 | STBD1 /// Q6Z | 8987   | starch binding domain 1 /// CDNA FLJ4    | 4.80E-05 | 2 | 3.71 | 3.92 | 3.88 | 3.89 | 3.98 | 3.99 | 3.91 | 3.87 |
| TC0102233 | STIL          | 6491   | SCL/TAL1 interrupting locus /// SCL-inte | 0.0003   | 2 | 2.97 | 2.98 | 3.06 | 3.22 | 3.28 | 3.20 | 3.13 | 3.12 |
| TC1100505 | STIP1         | 10963  | stress-induced-phosphoprotein 1 (Hsp)    | 1.11E-06 | 2 | 5.78 | 5.81 | 5.74 | 6.24 | 6.25 | 6.15 | 6.33 | 6.09 |
| TC0202073 | STK39         | 27347  | serine threonine kinase 39 (STE20/SPS)   | 5.19E-08 | 2 | 4.33 | 4.92 | 4.98 | 5.23 | 5.17 | 5.01 | 5.04 | 4.91 |
| TC0102008 | STMN1         | 3925   | stathmin 1/oncoprotein 18 /// Stathmi    | 8.59E-13 | 2 | 4.46 | 4.73 | 4.64 | 5.04 | 5.48 | 5.44 | 5.25 | 4.95 |
| TC0400712 | STOX2         | 56977  | storkhead box 2                          | 8.03E-05 | 2 | 3.28 | 3.38 | 3.24 | 3.26 | 3.62 | 3.63 | 3.51 | 3.37 |
| TC0901318 | STRBP         | 55342  | spermatid perinuclear RNA binding pro    | 3.79E-10 | 2 | 3.76 | 3.78 | 3.75 | 4.06 | 4.10 | 4.15 | 4.33 | 4.13 |
| TC1100977 | STT3A         | 3703   | STT3, subunit of the oligosaccharyltran  | 2.44E-08 | 2 | 5.22 | 5.38 | 5.40 | 5.87 | 5.95 | 5.89 | 5.89 | 5.69 |
| TC0300122 | STT3B         | 201595 | STT3, subunit of the oligosaccharyltran  | 0.000117 | 2 | 5.82 | 5.70 | 5.88 | 6.06 | 6.05 | 6.05 | 6.11 | 6.00 |
| TC0301329 | SUCLG2        | 8801   | succinate-CoA ligase, GDP-forming, bet   | 1.24E-05 | 2 | 4.31 | 4.41 | 4.62 | 4.89 | 4.82 | 4.77 | 4.89 | 4.60 |
| TC0300719 | SUCNR1        | 56670  | succinate receptor 1                     | 1.42E-08 | 2 | 2.89 | 3.11 | 3.01 | 3.41 | 3.93 | 3.84 | 3.85 | 3.44 |
| TC1300169 | SUGT1         | 10910  | SGT1, suppressor of G2 allele of SKP1 (S | 1.44E-06 | 2 | 3.79 | 4.40 | 4.59 | 4.69 | 4.80 | 4.79 | 4.86 | 4.72 |
| TC0901251 | SUSD1         | 64420  | sushi domain containing 1 /// Sushi do   | 2.52E-06 | 2 | 4.88 | 5.23 | 5.60 | 5.74 | 5.52 | 5.53 | 5.60 | 5.55 |
| TC0900386 | SUSD3         | 203328 | sushi domain containing 3 /// Sushi do   | 9.81E-08 | 2 | 4.38 | 5.13 | 4.64 | 4.88 | 5.23 | 5.08 | 4.93 | 4.72 |
| TC1000069 | SUV39H2       | 79723  | suppressor of variegation 3-9 homolog    | 1.37E-06 | 2 | 3.92 | 4.12 | 4.11 | 4.15 | 4.33 | 4.25 | 4.19 | 4.13 |
| TC1100167 | SWAP70        | 23075  | SWAP-70 protein                          | 8.72E-09 | 2 | 5.95 | 6.09 | 6.05 | 6.54 | 6.28 | 6.47 | 6.79 | 6.69 |
| TC0600844 | SYNJ2         | 8871   | synaptojanin 2 /// Synaptojanin-2 (EC    | 0.000148 | 2 | 4.14 | 4.19 | 4.14 | 4.34 | 4.48 | 4.32 | 4.28 | 4.24 |
| TC0102298 | TACSTD2       | 4070   | tumor-associated calcium signal transd   | 1.61E-05 | 2 | 3.30 | 3.59 | 3.60 | 3.94 | 3.98 | 3.94 | 3.93 | 3.71 |
| TC0102959 | TADA1L        | 117143 | transcriptional adaptor 1 (HFI1 homolo   | 3.43E-06 | 2 | 3.73 | 3.83 | 3.84 | 3.91 | 4.10 | 4.03 | 4.10 | 3.95 |
| TC1700397 | TADA2L        | 6871   | transcriptional adaptor 2 (ADA2 homol    | 1.60E-07 | 2 | 3.83 | 4.08 | 4.11 | 4.25 | 4.29 | 4.31 | 4.34 | 4.27 |
| TC0102051 | TAF12         | 6883   | TAF12 RNA polymerase II, TATA box bir    | 0.000305 | 2 | 6.33 | 6.37 | 6.60 | 6.58 | 6.47 | 6.56 | 6.60 | 6.65 |
| TC0701139 | TARP          | 445347 | TCR gamma alternate reading frame pr     | 1.07E-06 | 2 | 3.39 | 3.69 | 3.49 | 3.76 | 3.92 | 3.96 | 3.93 | 3.75 |
| TC0901185 | TBC1D2        | 55357  | TBC1 domain family, member 2 /// TBC     | 4.73E-06 | 2 | 5.13 | 5.35 | 5.41 | 5.63 | 5.59 | 5.54 | 5.40 | 5.37 |
| TC1600086 | TBC1D24       | 57465  | TBC1 domain family, member 24            | 0.0007   | 2 | 3.85 | 3.79 | 3.75 | 3.86 | 3.97 | 3.92 | 3.92 | 3.79 |
| TC0301831 | TBCCD1        | 55171  | TBCC domain containing 1                 | 0.000785 | 2 | 3.50 | 3.63 | 3.64 | 3.73 | 3.76 | 3.72 | 3.78 | 3.69 |

|           |                                                                 |                                                  |          |      |      |      |      |      |      |      |      |      |
|-----------|-----------------------------------------------------------------|--------------------------------------------------|----------|------|------|------|------|------|------|------|------|------|
| TC0600735 | TBPL1                                                           | 9519 TBP-like 1 /// TATA box-binding proteir     | 2.37E-06 | 2    | 5.15 | 5.47 | 5.56 | 5.66 | 5.63 | 5.75 | 5.64 | 5.67 |
| TC0600080 | tcag7.350                                                       | 402694 similar to ribosomal protein L15          | 1.06E-07 | 2    | 7.95 | 8.89 | 8.61 | 9.31 | 9.49 | 9.42 | 9.25 | 8.98 |
| TC0800936 | TCEA1                                                           | 6917 transcription elongation factor A (SII), 1  | 4.29E-06 | 2    | 6.01 | 6.36 | 6.54 | 6.70 | 6.60 | 6.68 | 6.68 | 6.68 |
| TC0X00459 | TCEAL1                                                          | 9338 transcription elongation factor A (SII)-li  | 2.60E-05 | 2    | 3.82 | 3.96 | 3.92 | 3.97 | 4.22 | 4.16 | 4.09 | 4.15 |
| TC0X00458 | TCEAL3                                                          | 85012 transcription elongation factor A (SII)-li | 1.25E-05 | 2    | 4.39 | 4.64 | 4.44 | 4.59 | 4.83 | 4.66 | 4.61 | 4.56 |
| TC0X01115 | TCEAL8                                                          | 90843 transcription elongation factor A (SII)-li | 6.17E-08 | 2    | 3.56 | 4.09 | 3.92 | 4.24 | 4.38 | 4.33 | 4.28 | 4.06 |
| TC1600778 | TCEB2                                                           | 6923 transcription elongation factor B (SIII),   | 7.68E-05 | 2    | 6.42 | 6.58 | 6.69 | 6.78 | 6.80 | 6.72 | 6.71 | 6.67 |
| TC0100256 | TCEB3                                                           | 6924 transcription elongation factor B (SIII),   | 1.31E-08 | 2    | 4.33 | 4.29 | 4.30 | 4.55 | 4.54 | 4.51 | 4.65 | 4.55 |
| TC0500574 | TCERG1                                                          | 10915 transcription elongation regulator 1       | 1.30E-05 | 2    | 3.70 | 3.99 | 3.88 | 4.08 | 4.28 | 4.28 | 4.39 | 4.15 |
| TC0600258 | TCF19                                                           | 6941 transcription factor 19 (SC1)               | 0.000668 | 2    | 3.62 | 3.61 | 3.59 | 3.78 | 3.90 | 3.88 | 3.83 | 3.70 |
| TC1000590 | TCF7L2                                                          | 6934 transcription factor 7-like 2 (T-cell spec  | 2.21E-10 | 2    | 5.92 | 6.13 | 5.87 | 6.56 | 6.29 | 6.03 | 6.01 | 6.09 |
| TC1101452 | TCN1                                                            | 6947 transcobalamin I (vitamin B12 binding p     | 8.37E-17 | 2    | 5.02 | 8.36 | 7.53 | 8.13 | 8.94 | 8.92 | 8.18 | 7.41 |
| TC1400435 | TDP1                                                            | 55775 tyrosyl-DNA phosphodiesterase 1 /// T      | 3.88E-06 | 2    | 4.08 | 4.14 | 4.07 | 4.25 | 4.45 | 4.57 | 4.50 | 4.31 |
| TC1300183 | TDRD3                                                           | 81550 tudor domain containing 3 /// Tudor do     | 1.02E-10 | 2    | 3.87 | 4.01 | 4.15 | 4.29 | 4.35 | 4.30 | 4.24 | 4.15 |
| TC0800377 | TERF1                                                           | 7013 telomeric repeat binding factor (NIMA-      | 5.38E-05 | 2    | 5.25 | 5.68 | 5.70 | 5.82 | 5.82 | 5.86 | 5.95 | 5.78 |
| TC1600599 | TERF2IP                                                         | 54386 telomeric repeat binding factor 2, inter   | 0.000445 | 2    | 8.30 | 8.78 | 8.74 | 8.76 | 8.70 | 8.82 | 8.87 | 8.78 |
| TC0901196 | TEX10                                                           | 54881 testis expressed 10                        | 8.14E-08 | 2    | 3.82 | 3.83 | 3.84 | 4.03 | 4.13 | 4.10 | 4.10 | 3.97 |
| TC1701615 | TEX2                                                            | 55852 testis expressed 2                         | 1.37E-06 | 2    | 4.14 | 4.79 | 4.45 | 4.83 | 5.17 | 5.04 | 4.92 | 4.55 |
| TC0601706 | TFB1M                                                           | 51106 transcription factor B1, mitochondrial     | 1.58E-06 | 2    | 4.19 | 4.00 | 4.12 | 4.30 | 4.38 | 4.33 | 4.36 | 4.33 |
| TC0103425 | TFB2M                                                           | 64216 transcription factor B2, mitochondrial     | 0.000838 | 2    | 4.13 | 4.37 | 4.44 | 4.48 | 4.55 | 4.59 | 4.57 | 4.58 |
| TC1901791 | TFPT                                                            | 29844 TCF3 (E2A) fusion partner (in childhood    | 3.14E-08 | 2    | 5.53 | 5.99 | 5.92 | 6.12 | 6.12 | 6.01 | 6.08 | 5.93 |
| TC1300584 | TGDS                                                            | 23483 TDP-glucose 4,6-dehydratase                | 1.75E-06 | 2    | 3.01 | 3.22 | 3.59 | 3.48 | 3.44 | 3.47 | 3.53 | 3.43 |
| TC0201798 | TGFBRAP1                                                        | 9392 transforming growth factor, beta recep      | 8.67E-10 | 2    | 4.47 | 4.55 | 4.52 | 4.86 | 4.99 | 4.98 | 5.03 | 4.80 |
| TC0701552 | THAP5                                                           | 168451 THAP domain containing 5                  | 0.000908 | 2    | 4.88 | 5.17 | 5.36 | 5.35 | 5.19 | 5.34 | 5.31 | 5.38 |
| TC0600128 | THEM2                                                           | 55856 thioesterase superfamily member 2          | 1.65E-17 | 2    | 4.92 | 5.01 | 5.21 | 5.75 | 5.73 | 5.80 | 5.83 | 5.62 |
| TC0500756 | THOC3                                                           | 84321 THO complex 3                              | 5.17E-08 | 2    | 4.24 | 4.21 | 4.08 | 4.27 | 4.49 | 4.58 | 4.55 | 4.43 |
| TC0501510 | THOC3                                                           | 84321 THO complex 3                              | 3.49E-06 | 2    | 4.59 | 4.53 | 4.44 | 4.63 | 4.79 | 4.77 | 4.77 | 4.64 |
| TC1701787 | THOC4                                                           | 10189 THO complex 4                              | 0.000338 | 2    | 5.01 | 5.40 | 5.26 | 5.30 | 5.41 | 5.45 | 5.42 | 5.43 |
| TC0301314 | THOC7                                                           | 80145 THO complex 7 homolog (Drosophila)         | 1.45E-20 | 2    | 6.66 | 7.71 | 7.76 | 7.79 | 7.80 | 7.86 | 7.87 | 7.85 |
| TC0300024 | THUMPD3                                                         | 25917 THUMP domain containing 3                  | 0.000151 | 2    | 4.33 | 4.76 | 4.73 | 4.87 | 4.93 | 5.02 | 5.15 | 4.82 |
| TC0501223 | TICAM2 /// TM353376 // toll-like receptor adaptor molecule 2 // | 7.49E-10                                         | 2        | 4.99 | 5.43 | 5.52 | 5.57 | 5.50 | 5.57 | 5.57 | 5.57 | 5.63 |
| TC1400890 | TIMM9                                                           | 26520 translocase of inner mitochondrial mer     | 0.000222 | 2    | 3.00 | 3.50 | 3.27 | 3.33 | 3.53 | 3.52 | 3.59 | 3.48 |
| TC0500272 | TINP1                                                           | 10412 TGF beta-inducible nuclear protein 1       | 1.51E-10 | 2    | 6.12 | 7.22 | 7.30 | 7.47 | 7.48 | 7.53 | 7.72 | 7.33 |
| TC1501052 | TIPIN                                                           | 54962 TIMELESS interacting protein               | 6.62E-11 | 2    | 3.67 | 4.15 | 3.96 | 4.39 | 4.89 | 4.84 | 4.75 | 4.31 |

|           |                |                                               |          |   |      |      |      |      |      |      |      |      |
|-----------|----------------|-----------------------------------------------|----------|---|------|------|------|------|------|------|------|------|
| TC0900283 | TJP2           | 9414 tight junction protein 2 (zona occluden  | 0.000244 | 2 | 3.89 | 3.81 | 3.84 | 3.94 | 4.00 | 4.05 | 4.05 | 3.97 |
| TC1701737 | TK1            | 7083 thymidine kinase 1, soluble              | 4.20E-05 | 2 | 4.30 | 4.45 | 4.44 | 4.55 | 4.65 | 4.59 | 4.52 | 4.36 |
| TC0202092 | TLK1           | 9874 tousled-like kinase 1 /// Serine/threoni | 2.31E-25 | 2 | 6.93 | 7.47 | 7.74 | 8.30 | 8.33 | 8.25 | 8.12 | 7.85 |
| TC1201062 | TM7SF3         | 51768 transmembrane 7 superfamily member      | 1.39E-11 | 2 | 4.76 | 4.50 | 4.96 | 5.19 | 5.25 | 5.20 | 5.25 | 5.06 |
| TC1001190 | TM9SF3         | 56889 transmembrane 9 superfamily member      | 0.000585 | 2 | 6.47 | 6.87 | 6.81 | 6.81 | 6.77 | 6.91 | 6.92 | 6.95 |
| TC0102957 | TMCO1          | 54499 transmembrane and coiled-coil domair    | 1.11E-06 | 2 | 5.48 | 5.82 | 5.98 | 5.92 | 5.94 | 5.93 | 5.97 | 6.00 |
| TC1401002 | TMED10         | 10972 transmembrane emp24-like trafficking    | 2.45E-06 | 2 | 6.41 | 6.74 | 6.68 | 6.88 | 6.96 | 6.83 | 6.86 | 6.84 |
| TC1200791 | TMED2          | 10959 transmembrane emp24 domain traffick     | 0.000285 | 2 | 8.67 | 8.92 | 9.00 | 9.04 | 9.07 | 9.12 | 9.04 | 9.06 |
| TC0900440 | TMEFF1 /// C9c | 91283 /// chromosome 9 open reading frame 30  | 0.000307 | 2 | 3.92 | 4.14 | 4.13 | 4.15 | 4.25 | 4.22 | 4.13 | 4.15 |
| TC1200281 | TMEM106C       | 79022 transmembrane protein 106C              | 2.07E-09 | 2 | 4.07 | 4.26 | 4.30 | 4.45 | 4.69 | 4.66 | 4.56 | 4.38 |
| TC1701134 | TMEM11         | 8834 transmembrane protein 11                 | 5.53E-06 | 2 | 4.28 | 4.52 | 4.65 | 4.76 | 4.84 | 4.75 | 4.51 | 4.55 |
| TC1100720 | TMEM126A       | 84233 transmembrane protein 126A              | 6.86E-06 | 2 | 3.90 | 4.59 | 4.75 | 4.81 | 4.98 | 4.94 | 5.01 | 4.75 |
| TC1900445 | TMEM147        | 10430 transmembrane protein 147               | 0.000491 | 2 | 4.72 | 4.87 | 4.87 | 4.93 | 5.03 | 4.95 | 4.95 | 4.95 |
| TC0600069 | TMEM14B        | 81853 transmembrane protein 14B /// Transn    | 8.57E-06 | 2 | 5.10 | 5.24 | 5.48 | 5.48 | 5.45 | 5.45 | 5.44 | 5.45 |
| TC0600068 | TMEM14C        | 51522 transmembrane protein 14C /// Transn    | 2.98E-08 | 2 | 4.76 | 4.91 | 5.01 | 5.27 | 5.28 | 5.32 | 5.41 | 5.32 |
| TC0301145 | TMEM158        | 25907 transmembrane protein 158 /// transr    | 7.29E-09 | 2 | 4.92 | 5.50 | 5.52 | 5.62 | 5.66 | 5.69 | 5.57 | 5.45 |
| TC1600239 | TMEM159        | 57146 transmembrane protein 159               | 2.67E-05 | 2 | 3.85 | 4.06 | 4.06 | 4.21 | 4.29 | 4.27 | 4.31 | 4.24 |
| TC0201650 | TMEM159 /// (  | 57146 /// transmembrane protein 159 /// chrom | 0.000572 | 2 | 2.86 | 2.96 | 2.97 | 2.98 | 3.05 | 3.02 | 3.09 | 3.03 |
| TC1200269 | TMEM16F        | 196527 transmembrane protein 16F              | 4.18E-10 | 2 | 3.89 | 5.08 | 4.72 | 5.52 | 5.92 | 5.92 | 5.67 | 5.41 |
| TC1601265 | TMEM170A       | 124491 transmembrane protein 170A             | 0.000285 | 2 | 5.82 | 5.86 | 5.92 | 6.03 | 6.01 | 6.05 | 6.09 | 6.08 |
| TC0400584 | TMEM184C       | 55751 transmembrane protein 184C              | 2.14E-07 | 2 | 4.93 | 4.98 | 5.27 | 5.30 | 5.11 | 5.27 | 5.51 | 5.43 |
| TC1700286 | TMEM199        | 147007 transmembrane protein 199              | 2.99E-07 | 2 | 5.73 | 5.74 | 5.62 | 5.99 | 5.94 | 5.94 | 6.08 | 6.08 |
| TC0901468 | TMEM203 /// (  | 94107 transmembrane protein 203 /// HBeAg     | 3.27E-13 | 2 | 5.69 | 5.82 | 5.98 | 6.24 | 6.34 | 6.33 | 6.43 | 6.40 |
| TC0701631 | TMEM209 /// †  | 84928 transmembrane protein 209 /// CDNA      | 8.73E-07 | 2 | 3.87 | 3.99 | 4.04 | 4.25 | 4.27 | 4.28 | 4.33 | 4.29 |
| TC1100456 | TMEM216 /// †  | 51259 transmembrane protein 216               | 4.96E-07 | 2 | 5.10 | 5.47 | 5.63 | 5.68 | 5.81 | 5.81 | 5.77 | 5.67 |
| TC1600324 | TMEM219        | 124446 transmembrane protein 219              | 1.33E-07 | 2 | 5.83 | 6.05 | 5.98 | 6.07 | 6.20 | 6.26 | 6.29 | 6.27 |
| TC0900463 | TMEM38B        | 55151 transmembrane protein 38B /// Transn    | 3.25E-05 | 2 | 3.87 | 3.91 | 3.95 | 4.10 | 4.17 | 4.11 | 4.21 | 4.12 |
| TC0301474 | TMEM39A        | 55254 transmembrane protein 39A               | 1.12E-05 | 2 | 4.51 | 4.43 | 4.61 | 4.71 | 4.73 | 4.71 | 4.84 | 4.77 |
| TC0102270 | TMEM48         | 55706 transmembrane protein 48 /// Nucleop    | 5.20E-07 | 2 | 3.55 | 3.96 | 3.99 | 4.13 | 4.23 | 4.21 | 4.24 | 4.14 |
| TC0801111 | TMEM55A        | 55529 transmembrane protein 55A               | 0.000768 | 2 | 8.12 | 7.80 | 8.19 | 8.24 | 8.27 | 8.32 | 8.14 | 8.26 |
| TC0100749 | TMEM56 /// R\  | 148534 // transmembrane protein 56 /// RWD do | 9.02E-05 | 2 | 4.62 | 4.73 | 4.53 | 4.53 | 4.75 | 4.84 | 4.77 | 4.68 |
| TC0701373 | TMEM60         | 85025 transmembrane protein 60                | 7.49E-07 | 2 | 7.60 | 8.09 | 8.47 | 8.40 | 8.34 | 8.60 | 8.56 | 8.52 |
| TC1500271 | TMEM62         | 80021 transmembrane protein 62                | 0.000239 | 2 | 3.46 | 3.49 | 3.64 | 3.62 | 3.63 | 3.71 | 3.82 | 3.77 |
| TC0800940 | TMEM68         | 137695 transmembrane protein 68               | 1.69E-05 | 2 | 4.20 | 4.22 | 4.25 | 4.40 | 4.40 | 4.46 | 4.47 | 4.47 |

|           |                         |                                                 |          |   |       |       |       |       |       |       |       |       |
|-----------|-------------------------|-------------------------------------------------|----------|---|-------|-------|-------|-------|-------|-------|-------|-------|
| TC1700586 | TMEM92                  | 162461 transmembrane protein 92                 | 0.00071  | 2 | 3.57  | 3.59  | 3.49  | 3.58  | 3.79  | 3.76  | 3.58  | 3.48  |
| TC1700036 | TMEM93                  | 83460 transmembrane protein 93                  | 0.000159 | 2 | 4.69  | 4.84  | 5.03  | 5.05  | 5.09  | 5.05  | 5.01  | 5.00  |
| TC1101191 | TMEM9B                  | 56674 TMEM9 domain family, member B             | 7.89E-11 | 2 | 5.47  | 5.90  | 5.99  | 6.02  | 6.01  | 6.06  | 6.04  | 6.08  |
| TC1200615 | TMPO                    | 7112 thymopoietin                               | 9.83E-08 | 2 | 4.11  | 4.38  | 4.30  | 4.59  | 4.83  | 4.80  | 4.82  | 4.51  |
| TC0200400 | TMSB10                  | 9168 thymosin beta 10                           | 0.000152 | 2 | 10.11 | 10.29 | 10.38 | 10.60 | 10.40 | 10.46 | 10.71 | 10.73 |
| TC0401124 | TMSL3                   | 7117 thymosin-like 3                            | 1.07E-09 | 2 | 9.98  | 10.15 | 10.29 | 10.39 | 10.37 | 10.43 | 10.35 | 10.37 |
| TC2000829 | TMSL3                   | 7117 thymosin-like 3                            | 1.18E-08 | 2 | 8.71  | 9.05  | 9.28  | 9.30  | 9.32  | 9.40  | 9.28  | 9.24  |
| TC0X00046 | TMSL3 /// TMS7117 /// 7 | thymosin-like 3 /// thymosin beta 4, X-         | 1.67E-14 | 2 | 6.89  | 6.89  | 6.94  | 7.09  | 7.16  | 7.15  | 7.04  | 7.07  |
| TC0500418 | TNFAIP8                 | 25816 tumor necrosis factor, alpha-induced p    | 5.55E-07 | 2 | 5.17  | 5.50  | 5.56  | 5.77  | 5.82  | 5.81  | 5.82  | 5.64  |
| TC1901812 | TNNT1                   | 7138 troponin T type 1 (skeletal, slow) /// Tr  | 3.43E-05 | 2 | 5.45  | 5.37  | 5.49  | 5.77  | 5.58  | 5.59  | 5.72  | 5.70  |
| TC0500260 | TNPO1                   | 3842 transportin 1                              | 1.26E-14 | 2 | 5.98  | 6.26  | 6.50  | 6.72  | 6.67  | 6.61  | 6.45  | 6.29  |
| TC0103366 | TOMM20                  | 9804 translocase of outer mitochondrial mer     | 9.51E-10 | 2 | 6.08  | 6.18  | 6.13  | 6.54  | 6.58  | 6.61  | 6.72  | 6.58  |
| TC0301401 | TOMM70A                 | 9868 translocase of outer mitochondrial mer     | 1.48E-07 | 2 | 3.54  | 3.60  | 3.61  | 3.85  | 3.94  | 3.93  | 4.03  | 3.93  |
| TC1701308 | TOP2A /// P11:          | 7153 topoisomerase (DNA) II alpha 170kDa /      | 7.03E-12 | 2 | 3.33  | 3.90  | 3.71  | 4.39  | 5.01  | 4.95  | 4.77  | 4.22  |
| TC0701395 | TP53AP1                 | --- P53TG1-A (TP53 activated protein 1) (T      | 8.95E-07 | 2 | 4.60  | 4.96  | 5.07  | 5.16  | 5.09  | 5.19  | 5.39  | 5.25  |
| TC1500394 | TPM1                    | 7168 tropomyosin 1 (alpha) /// Tropomyosin      | 2.06E-08 | 2 | 5.11  | 5.54  | 5.44  | 5.56  | 5.86  | 5.78  | 5.61  | 5.43  |
| TC1101160 | TPP1                    | 1200 tripeptidyl peptidase I /// Tripeptidyl-p  | 3.97E-05 | 2 | 6.43  | 6.86  | 6.69  | 7.09  | 7.19  | 7.12  | 7.01  | 6.82  |
| TC0500809 | TPPP                    | 11076 tubulin polymerization promoting prot     | 0.00029  | 2 | 4.06  | 4.44  | 4.36  | 4.38  | 4.42  | 4.52  | 4.42  | 4.43  |
| TC0201627 | TPRKB                   | 51002 TP53RK binding protein /// TP53RK-bin     | 0.000527 | 2 | 4.57  | 4.64  | 4.69  | 4.65  | 4.69  | 4.77  | 4.87  | 4.81  |
| TC2000169 | TPX2                    | 22974 TPX2, microtubule-associated, homolog     | 3.35E-09 | 2 | 3.67  | 4.15  | 4.01  | 4.49  | 4.99  | 4.92  | 4.68  | 4.36  |
| TC0801018 | TRAM1                   | 23471 translocation associated membrane pro     | 5.57E-10 | 2 | 6.53  | 7.33  | 7.46  | 7.62  | 7.56  | 7.56  | 7.53  | 7.49  |
| TC0X00777 | TRAPPC2                 | 6399 trafficking protein particle complex 2 //  | 9.03E-05 | 2 | 4.26  | 4.25  | 4.42  | 4.46  | 4.40  | 4.45  | 4.49  | 4.51  |
| TC1900136 | TRAPPC5                 | 126003 trafficking protein particle complex 5   | 0.000111 | 2 | 6.62  | 6.83  | 6.84  | 6.99  | 7.07  | 7.00  | 6.92  | 6.97  |
| TC0601245 | TREML1                  | 340205 triggering receptor expressed on myelc   | 0.000691 | 2 | 6.22  | 6.41  | 6.35  | 6.83  | 7.09  | 7.03  | 6.77  | 6.58  |
| TC0800825 | TRIM35                  | 23087 tripartite motif-containing 35 /// Tripar | 0.000689 | 2 | 4.72  | 4.81  | 4.91  | 4.91  | 5.05  | 4.98  | 5.00  | 4.92  |
| TC1100277 | TRIM44                  | 54765 tripartite motif-containing 44            | 0.000667 | 2 | 4.42  | 4.41  | 4.40  | 4.70  | 4.62  | 4.64  | 4.94  | 4.82  |
| TC1101107 | TRIM68                  | 55128 tripartite motif-containing 68            | 0.000106 | 2 | 4.41  | 4.57  | 4.61  | 4.55  | 4.48  | 4.63  | 4.78  | 4.77  |
| TC1800265 | TSHZ1                   | 10194 teashirt zinc finger homeobox 1           | 0.000452 | 2 | 4.39  | 4.61  | 4.68  | 4.77  | 4.76  | 4.67  | 4.76  | 4.80  |
| TC0200650 | TSN                     | 7247 translin                                   | 3.03E-09 | 2 | 4.67  | 4.83  | 5.00  | 5.16  | 5.25  | 5.25  | 5.27  | 5.15  |
| TC0102571 | TSPAN2                  | 10100 tetraspanin 2 /// Tetraspanin-2 (Tspan-   | 1.14E-11 | 2 | 6.87  | 7.44  | 7.65  | 8.23  | 8.22  | 7.78  | 7.63  | 7.53  |
| TC0601554 | TSPYL1                  | 7259 TSPY-like 1                                | 0.000189 | 2 | 5.48  | 5.85  | 5.62  | 5.67  | 5.68  | 5.79  | 5.82  | 5.80  |
| TC2200640 | TST                     | 7263 thiosulfate sulfurtransferase (rhodanes    | 0.000167 | 2 | 5.48  | 5.78  | 5.78  | 5.89  | 5.93  | 5.87  | 5.80  | 5.88  |
| TC0500660 | TTC1                    | 7265 tetratricopeptide repeat domain 1          | 1.65E-09 | 2 | 7.31  | 7.63  | 7.86  | 8.02  | 7.84  | 8.00  | 8.11  | 8.06  |
| TC0200165 | TTC27                   | 55622 tetratricopeptide repeat domain 27        | 0.000279 | 2 | 2.85  | 2.83  | 2.82  | 2.90  | 3.03  | 3.01  | 3.00  | 2.90  |

|           |                |                                                   |          |   |      |      |      |      |      |      |      |      |
|-----------|----------------|---------------------------------------------------|----------|---|------|------|------|------|------|------|------|------|
| TC2100118 | TTC3           | 7267 tetratricopeptide repeat domain 3            | 1.55E-11 | 2 | 3.61 | 3.84 | 3.69 | 4.23 | 4.40 | 4.35 | 4.48 | 4.15 |
| TC0501154 | TTC37          | 9652 tetratricopeptide repeat domain 37           | 0.00014  | 2 | 3.35 | 3.59 | 3.54 | 3.76 | 3.90 | 3.88 | 3.93 | 3.71 |
| TC1400665 | TTC5           | 91875 tetratricopeptide repeat domain 5 /// 1     | 0.000304 | 2 | 3.89 | 3.86 | 3.90 | 3.97 | 4.04 | 3.90 | 4.10 | 4.01 |
| TC1401059 | TTC7B          | 145567 tetratricopeptide repeat domain 7B ///     | 2.45E-05 | 2 | 4.26 | 4.47 | 4.39 | 4.54 | 4.69 | 4.77 | 4.74 | 4.63 |
| TC1100485 | TTC9C          | 283237 tetratricopeptide repeat domain 9C ///     | 1.34E-08 | 2 | 4.53 | 4.53 | 5.06 | 4.91 | 4.85 | 4.83 | 4.86 | 4.86 |
| TC0600523 | TTK            | 7272 TTK protein kinase /// Dual specificity p    | 2.58E-06 | 2 | 2.27 | 2.35 | 2.36 | 2.54 | 2.88 | 2.80 | 2.76 | 2.55 |
| TC0200583 | TTL            | 150465 tubulin tyrosine ligase                    | 4.23E-06 | 2 | 3.97 | 3.97 | 4.07 | 4.24 | 4.23 | 4.27 | 4.27 | 4.32 |
| TC1200301 | TUBA1C         | 84790 tubulin, alpha 1c /// Tubulin alpha-1C c    | 1.77E-07 | 2 | 6.29 | 6.48 | 6.54 | 6.61 | 6.69 | 6.66 | 6.60 | 6.58 |
| TC2000415 | TUBB1          | 81027 tubulin, beta 1                             | 0.000103 | 2 | 4.83 | 5.04 | 5.02 | 6.03 | 6.15 | 6.25 | 5.97 | 5.90 |
| TC1600971 | TUFM           | 7284 Tu translation elongation factor, mitocl     | 0.000994 | 2 | 5.05 | 5.20 | 5.27 | 5.40 | 5.34 | 5.31 | 5.28 | 5.24 |
| TC0301230 | TUSC2          | 11334 tumor suppressor candidate 2                | 1.97E-09 | 2 | 6.22 | 6.34 | 6.41 | 6.84 | 6.74 | 6.59 | 6.60 | 6.68 |
| TC1101475 | TUT1 /// EEF1C | 731096 // terminal uridylyl transferase 1, U6 snR | 6.43E-06 | 2 | 5.17 | 5.44 | 5.50 | 5.65 | 5.67 | 5.64 | 5.68 | 5.50 |
| TC1400220 | TXNDC1         | 81542 thioredoxin domain containing 1             | 1.32E-14 | 2 | 6.69 | 7.62 | 7.77 | 7.88 | 7.87 | 7.84 | 7.83 | 7.66 |
| TC0500489 | TXNDC15        | 79770 thioredoxin domain containing 15            | 1.49E-09 | 2 | 5.34 | 5.25 | 5.74 | 5.70 | 5.61 | 5.64 | 5.82 | 5.76 |
| TC1700074 | TXNDC17        | 84817 thioredoxin domain containing 17            | 5.97E-12 | 2 | 6.95 | 7.10 | 7.62 | 7.70 | 7.55 | 7.60 | 7.57 | 7.62 |
| TC0600938 | TXNDC5 /// ML  | 81567 /// thioredoxin domain containing 5 /// m   | 6.16E-06 | 2 | 4.71 | 4.98 | 5.06 | 5.08 | 5.15 | 5.07 | 5.12 | 4.97 |
| TC0201779 | TXNDC9         | 10190 thioredoxin domain containing 9             | 0.000183 | 2 | 5.38 | 5.63 | 5.77 | 5.72 | 5.68 | 5.69 | 5.82 | 5.79 |
| TC1800561 | TXNL4A         | 10907 thioredoxin-like 4A /// Thioredoxin-like    | 1.67E-05 | 2 | 4.75 | 4.93 | 5.06 | 5.13 | 5.17 | 5.07 | 5.15 | 5.05 |
| TC1800007 | TYMS           | 7298 thymidylate synthetase /// Thymidylate       | 1.92E-13 | 2 | 4.48 | 5.30 | 4.90 | 5.71 | 6.43 | 6.44 | 6.10 | 5.61 |
| TC0100655 | TYW3           | 127253 tRNA-yW synthesizing protein 3 homol       | 1.76E-05 | 2 | 3.69 | 3.91 | 3.87 | 4.23 | 4.40 | 4.34 | 4.48 | 4.18 |
| TC0101229 | UAP1           | 6675 UDP-N-acteylglucosamine pyrophospho          | 6.77E-09 | 2 | 4.24 | 4.28 | 4.18 | 4.43 | 4.53 | 4.59 | 4.64 | 4.63 |
| TC1900420 | UBA2           | 10054 ubiquitin-like modifier activating enzym    | 7.64E-08 | 2 | 3.53 | 3.65 | 3.57 | 3.86 | 4.07 | 4.01 | 4.02 | 3.90 |
| TC0300629 | UBA5           | 79876 ubiquitin-like modifier activating enzym    | 1.54E-07 | 2 | 3.36 | 3.82 | 3.44 | 3.88 | 4.18 | 4.17 | 4.23 | 3.87 |
| TC1100938 | UBASH3B        | 84959 ubiquitin associated and SH3 domain c       | 2.82E-08 | 2 | 5.71 | 5.49 | 5.86 | 6.03 | 5.88 | 6.30 | 6.31 | 6.22 |
| TC2000324 | UBE2C          | 11065 ubiquitin-conjugating enzyme E2C            | 3.32E-09 | 2 | 5.54 | 5.46 | 5.39 | 5.59 | 5.78 | 5.70 | 5.58 | 5.54 |
| TC0300106 | UBE2E1         | 7324 ubiquitin-conjugating enzyme E2E 1 (U        | 6.55E-05 | 2 | 6.43 | 6.92 | 6.81 | 7.11 | 7.13 | 7.09 | 7.20 | 7.13 |
| TC0200906 | UBE2E3         | 10477 ubiquitin-conjugating enzyme E2E 3 (U       | 8.67E-10 | 2 | 5.71 | 5.72 | 5.71 | 5.94 | 5.92 | 6.14 | 6.21 | 6.18 |
| TC1700931 | UBE2G1         | 7326 ubiquitin-conjugating enzyme E2G 1 (U        | 9.59E-09 | 2 | 7.50 | 7.84 | 7.99 | 8.22 | 8.13 | 8.05 | 7.97 | 7.98 |
| TC1600049 | UBE2I          | 7329 ubiquitin-conjugating enzyme E2I (UBC        | 0.000179 | 2 | 5.39 | 5.35 | 5.36 | 5.51 | 5.54 | 5.49 | 5.54 | 5.52 |
| TC1901881 | UBE2M          | 9040 ubiquitin-conjugating enzyme E2M (UB         | 0.000313 | 2 | 5.54 | 5.83 | 5.76 | 5.86 | 5.86 | 5.92 | 5.85 | 5.88 |
| TC0102813 | UBE2Q1         | 55585 ubiquitin-conjugating enzyme E2Q fam        | 1.30E-08 | 2 | 7.17 | 7.05 | 7.20 | 7.40 | 7.32 | 7.37 | 7.48 | 7.46 |
| TC1500506 | UBE2Q2         | 92912 ubiquitin-conjugating enzyme E2Q fam        | 7.07E-11 | 2 | 4.98 | 5.52 | 5.51 | 5.96 | 5.79 | 5.89 | 6.00 | 6.00 |
| TC0103126 | UBE2T          | 29089 ubiquitin-conjugating enzyme E2T (put       | 2.79E-07 | 2 | 3.90 | 3.95 | 3.92 | 4.11 | 4.55 | 4.38 | 4.34 | 4.14 |
| TC1300202 | UCHL3          | 7347 ubiquitin carboxyl-terminal esterase L3      | 1.02E-08 | 2 | 4.48 | 4.66 | 4.61 | 4.84 | 4.91 | 4.89 | 4.94 | 4.81 |



|           |               |                                                |          |   |      |      |      |      |      |      |      |      |
|-----------|---------------|------------------------------------------------|----------|---|------|------|------|------|------|------|------|------|
| TC0103087 | UCHL5         | 51377 ubiquitin carboxyl-terminal hydrolase L  | 4.55E-07 | 2 | 5.46 | 5.90 | 5.88 | 6.01 | 6.06 | 6.00 | 6.04 | 5.91 |
| TC0101251 | UCK2          | 7371 uridine-cytidine kinase 2                 | 0.000176 | 2 | 3.81 | 4.11 | 4.06 | 4.10 | 4.20 | 4.21 | 4.08 | 4.01 |
| TC2200183 | UCRC /// NP_0 | 29796 ubiquinol-cytochrome c reductase com     | 2.45E-08 | 2 | 6.02 | 6.55 | 6.70 | 6.75 | 6.70 | 6.75 | 6.76 | 6.69 |
| TC0101203 | UFC1          | 51506 ubiquitin-fold modifier conjugating enz  | 3.59E-10 | 2 | 5.68 | 6.07 | 6.24 | 6.69 | 6.61 | 6.43 | 6.56 | 6.30 |
| TC0401458 | UFSP2         | 55325 UFM1-specific peptidase 2                | 3.26E-05 | 2 | 3.74 | 3.77 | 3.76 | 3.87 | 3.84 | 3.81 | 4.02 | 3.93 |
| TC0400889 | UGDH          | 7358 UDP-glucose dehydrogenase                 | 2.03E-09 | 2 | 3.76 | 3.70 | 3.63 | 4.04 | 4.17 | 4.26 | 4.42 | 4.20 |
| TC1300299 | UPF3A         | 65110 UPF3 regulator of nonsense transcripts   | 8.81E-08 | 2 | 5.01 | 5.28 | 5.29 | 5.35 | 5.40 | 5.45 | 5.50 | 5.40 |
| TC0X01191 | UPF3B         | 65109 UPF3 regulator of nonsense transcripts   | 0.000149 | 2 | 4.66 | 4.86 | 4.74 | 4.90 | 5.04 | 5.07 | 5.39 | 5.15 |
| TC1901004 | UQCR          | 10975 ubiquinol-cytochrome c reductase, 6.4l   | 1.69E-06 | 2 | 6.98 | 7.28 | 7.56 | 7.76 | 7.74 | 7.69 | 7.61 | 7.63 |
| TC0100508 | UQCRH         | 7388 ubiquinol-cytochrome c reductase hing     | 7.63E-15 | 2 | 6.17 | 7.30 | 7.50 | 7.62 | 7.81 | 7.71 | 7.59 | 7.34 |
| TC0500473 | UQCRQ         | 27089 ubiquinol-cytochrome c reductase, con    | 1.89E-07 | 2 | 6.30 | 6.40 | 6.47 | 6.65 | 6.64 | 6.63 | 6.65 | 6.65 |
| TC1001340 | UROS          | 7390 uroporphyrinogen III synthase (congen     | 0.000115 | 2 | 3.91 | 3.99 | 4.03 | 4.00 | 4.11 | 4.12 | 4.18 | 4.06 |
| TC0100606 | USP1          | 7398 ubiquitin specific peptidase 1            | 1.21E-09 | 2 | 4.95 | 5.21 | 5.35 | 5.42 | 5.41 | 5.53 | 5.59 | 5.59 |
| TC1600938 | USP31         | 57478 ubiquitin specific peptidase 31 /// Ubiq | 0.000562 | 2 | 3.94 | 3.87 | 3.95 | 3.97 | 4.07 | 3.95 | 3.99 | 3.95 |
| TC1000764 | USP6NL        | 9712 USP6 N-terminal like                      | 2.30E-08 | 2 | 3.90 | 4.17 | 4.28 | 4.57 | 4.51 | 4.56 | 4.56 | 4.37 |
| TC0100408 | UTP11L        | 51118 UTP11-like, U3 small nucleolar ribonucl  | 6.94E-11 | 2 | 4.31 | 4.59 | 4.77 | 5.01 | 5.10 | 5.13 | 5.27 | 5.00 |
| TC0500267 | UTP15         | 84135 UTP15, U3 small nucleolar ribonucleop    | 1.99E-06 | 2 | 3.22 | 3.16 | 3.16 | 3.19 | 3.41 | 3.35 | 3.41 | 3.32 |
| TC0400297 | UTP3          | 57050 UTP3, small subunit (SSU) processome     | 5.65E-05 | 2 | 3.75 | 3.88 | 3.98 | 4.34 | 4.25 | 4.32 | 4.70 | 4.55 |
| TC0201802 | UXS1          | 80146 UDP-glucuronate decarboxylase 1          | 1.03E-12 | 2 | 4.90 | 5.34 | 5.23 | 5.88 | 6.10 | 6.00 | 5.87 | 5.71 |
| TC0X00890 | UXT           | 8409 ubiquitously-expressed transcript /// P   | 1.65E-05 | 2 | 5.64 | 6.04 | 6.10 | 6.11 | 6.15 | 6.19 | 6.18 | 6.10 |
| TC0200413 | VAMP5         | 10791 vesicle-associated membrane protein 5    | 0.000334 | 2 | 6.23 | 6.54 | 6.54 | 6.94 | 6.80 | 6.85 | 7.04 | 7.06 |
| TC0200412 | VAMP8         | 8673 vesicle-associated membrane protein 8     | 3.22E-17 | 2 | 5.82 | 7.06 | 7.13 | 8.00 | 8.21 | 8.37 | 8.32 | 7.73 |
| TC2000409 | VAPB          | 9217 VAMP (vesicle-associated membrane p       | 2.40E-05 | 2 | 6.02 | 6.26 | 6.13 | 6.25 | 6.32 | 6.35 | 6.26 | 6.20 |
| TC1701397 | VAT1          | 10493 vesicle amine transport protein 1 homc   | 0.000247 | 2 | 4.54 | 4.80 | 4.82 | 4.97 | 5.12 | 5.01 | 4.87 | 4.75 |
| TC0501285 | VDAC1         | 7416 voltage-dependent anion channel 1         | 3.20E-07 | 2 | 5.26 | 5.56 | 5.52 | 5.69 | 5.78 | 5.70 | 5.67 | 5.60 |
| TC1000354 | VDAC2         | 7417 voltage-dependent anion channel 2 ///     | 1.17E-05 | 2 | 5.70 | 5.69 | 5.80 | 5.83 | 5.89 | 5.92 | 5.99 | 5.94 |
| TC0301697 | VEPH1         | 79674 ventricular zone expressed PH domain     | 1.05E-07 | 2 | 3.09 | 3.31 | 3.24 | 3.32 | 3.69 | 3.59 | 3.50 | 3.36 |
| TC1200595 | VEZT          | 55591 vezatin, adherens junctions transmemk    | 0.00063  | 2 | 3.93 | 3.94 | 3.88 | 3.97 | 4.11 | 4.11 | 4.10 | 4.06 |
| TC1601034 | VKORC1        | 79001 vitamin K epoxide reductase complex, s   | 1.95E-07 | 2 | 5.88 | 6.02 | 6.16 | 6.25 | 6.30 | 6.25 | 6.21 | 6.20 |
| TC0900309 | VPS13A        | 23230 vacuolar protein sorting 13 homolog A    | 3.61E-10 | 2 | 3.82 | 3.93 | 3.81 | 4.18 | 4.36 | 4.36 | 4.42 | 4.22 |
| TC1500244 | VPS18         | 57617 vacuolar protein sorting 18 homolog (S   | 9.16E-05 | 2 | 5.09 | 5.12 | 5.09 | 5.37 | 5.38 | 5.39 | 5.36 | 5.46 |
| TC0200258 | VRK2          | 7444 vaccinia related kinase 2                 | 2.11E-07 | 2 | 4.86 | 5.10 | 5.47 | 5.48 | 5.26 | 5.35 | 5.51 | 5.46 |
| TC1901789 | VSTM1         | 284415 V-set and transmembrane domain cont     | 3.35E-05 | 2 | 6.97 | 7.47 | 7.82 | 8.12 | 8.15 | 8.09 | 8.07 | 7.89 |
| TC0701601 | WASL          | 8976 Wiskott-Aldrich syndrome-like             | 1.62E-05 | 2 | 4.27 | 4.65 | 4.61 | 4.68 | 4.67 | 4.78 | 4.87 | 4.77 |

|           |          |        |                                          |          |   |      |      |      |      |      |      |      |      |
|-----------|----------|--------|------------------------------------------|----------|---|------|------|------|------|------|------|------|------|
| TC1400873 | WDHD1    | 11169  | WD repeat and HMG-box DNA binding        | 6.43E-09 | 2 | 3.40 | 3.56 | 3.53 | 3.90 | 4.34 | 4.28 | 4.22 | 3.91 |
| TC0500390 | WDR36    | 134430 | WD repeat domain 36                      | 4.26E-07 | 2 | 3.21 | 3.36 | 3.25 | 3.48 | 3.73 | 3.71 | 3.71 | 3.57 |
| TC0200142 | WDR43    | ---    | WD repeat protein 43. [Source:Uniprot    | 2.34E-09 | 2 | 3.49 | 3.57 | 3.42 | 3.78 | 3.84 | 3.97 | 4.07 | 3.95 |
| TC0900681 | WDR5     | 11091  | WD repeat domain 5                       | 9.64E-07 | 2 | 4.80 | 4.75 | 4.77 | 4.94 | 5.08 | 5.01 | 5.06 | 4.97 |
| TC0102066 | WDR57    | 9410   | WD repeat domain 57 (U5 snRNP speci      | 4.32E-08 | 2 | 4.27 | 4.35 | 4.33 | 4.55 | 4.81 | 4.80 | 4.77 | 4.65 |
| TC0700932 | WDR60    | 55112  | WD repeat domain 60                      | 0.000198 | 2 | 3.95 | 4.23 | 4.26 | 4.28 | 4.28 | 4.26 | 4.29 | 4.26 |
| TC0800534 | WDR67    | 93594  | WD repeat domain 67 /// WD repeat p      | 3.63E-05 | 2 | 3.60 | 3.53 | 3.66 | 3.88 | 3.87 | 3.78 | 3.75 | 3.69 |
| TC1700677 | WDR68    | 10238  | WD repeat domain 68                      | 6.46E-08 | 2 | 5.95 | 6.03 | 6.10 | 6.32 | 6.29 | 6.36 | 6.41 | 6.42 |
| TC0200931 | WDR75    | 84128  | WD repeat domain 75                      | 6.58E-06 | 2 | 3.53 | 3.49 | 3.45 | 3.61 | 3.74 | 3.75 | 3.92 | 3.68 |
| TC1500286 | WDR76    | 79968  | WD repeat domain 76 /// WD repeat p      | 1.69E-09 | 2 | 3.31 | 3.58 | 3.46 | 3.94 | 4.46 | 4.38 | 4.28 | 3.90 |
| TC1400908 | WDR89    | 112840 | WD repeat domain 89                      | 0.000345 | 2 | 3.50 | 3.72 | 3.72 | 3.67 | 3.83 | 3.78 | 3.74 | 3.75 |
| TC0800491 | WDSOF1   | 25879  | WD repeats and SOF1 domain containi      | 1.36E-06 | 2 | 3.76 | 3.68 | 3.62 | 3.91 | 4.09 | 4.12 | 4.13 | 3.99 |
| TC1100163 | WEE1     | 7465   | WEE1 homolog (S. pombe)                  | 9.67E-17 | 2 | 3.90 | 3.65 | 3.58 | 4.26 | 4.58 | 4.63 | 4.73 | 4.58 |
| TC0400023 | WHSC1    | 7468   | Wolf-Hirschhorn syndrome candidate 1     | 3.09E-05 | 2 | 4.51 | 4.49 | 4.43 | 4.56 | 4.77 | 4.73 | 4.77 | 4.61 |
| TC1201285 | WIBG     | 84305  | within bgcn homolog (Drosophila) /// P   | 0.000332 | 2 | 4.32 | 4.45 | 4.64 | 4.69 | 4.74 | 4.71 | 4.68 | 4.59 |
| TC1201609 | WSB2     | 55884  | WD repeat and SOCS box-containing 2      | 5.48E-12 | 2 | 5.50 | 6.06 | 6.17 | 6.75 | 6.58 | 6.57 | 6.54 | 6.38 |
| TC0800416 | WWP1     | 11059  | WW domain containing E3 ubiquitin pr     | 1.28E-06 | 2 | 4.12 | 4.16 | 4.25 | 4.55 | 4.42 | 4.44 | 4.75 | 4.55 |
| TC0X00141 | XK       | 7504   | X-linked Kx blood group (McLeod syndr    | 5.39E-05 | 2 | 4.56 | 4.61 | 4.60 | 5.00 | 5.07 | 5.13 | 5.19 | 5.06 |
| TC0201548 | XPO1     | 7514   | exportin 1 (CRM1 homolog, yeast)         | 5.02E-06 | 2 | 5.04 | 4.90 | 5.20 | 5.31 | 5.30 | 5.42 | 5.48 | 5.41 |
| TC1300323 | XPO4     | 64328  | exportin 4 /// Exportin-4 (Exp4). [Sourc | 1.42E-05 | 2 | 3.42 | 3.51 | 3.48 | 3.59 | 3.71 | 3.67 | 3.73 | 3.67 |
| TC0601286 | XPO5     | 57510  | exportin 5 /// Exportin-5 (Exp5) (Ran-bi | 6.78E-09 | 2 | 3.86 | 3.81 | 3.76 | 3.96 | 4.08 | 4.05 | 4.20 | 4.03 |
| TC1200480 | XPOT     | 11260  | exportin, tRNA (nuclear export recepto   | 8.47E-09 | 2 | 4.40 | 4.46 | 4.86 | 5.15 | 5.18 | 5.03 | 5.23 | 4.92 |
| TC1200464 | XRCC6BP1 | 91419  | XRCC6 binding protein 1                  | 5.56E-09 | 2 | 3.48 | 3.84 | 3.85 | 4.19 | 4.33 | 4.45 | 4.32 | 4.19 |
| TC1201114 | YAF2     | 10138  | YY1 associated factor 2 /// YY1-associat | 2.18E-07 | 2 | 5.26 | 5.29 | 5.31 | 5.54 | 5.51 | 5.59 | 5.60 | 5.62 |
| TC1201092 | YARS2    | 51067  | tyrosyl-tRNA synthetase 2, mitochondr    | 0.000215 | 2 | 3.42 | 3.64 | 3.64 | 3.74 | 3.95 | 3.78 | 3.81 | 3.77 |
| TC1200507 | YEATS4   | 8089   | YEATS domain containing 4                | 1.04E-10 | 2 | 3.67 | 4.81 | 4.98 | 5.35 | 5.56 | 5.66 | 5.62 | 5.32 |
| TC0102132 | YRDC     | 79693  | yrnC domain containing (E. coli)         | 0.000667 | 2 | 4.55 | 4.71 | 4.79 | 4.93 | 4.82 | 4.96 | 4.72 | 4.81 |
| TC0100333 | YTHDF2   | 51441  | YTH domain family, member 2 /// YTH      | 3.68E-05 | 2 | 5.04 | 5.44 | 5.55 | 5.57 | 5.55 | 5.50 | 5.64 | 5.55 |
| TC2200217 | YWHAH    | 7533   | tyrosine 3-monooxygenase/tryptophan      | 4.08E-12 | 2 | 6.15 | 6.54 | 6.54 | 6.71 | 6.87 | 6.77 | 6.66 | 6.53 |
| TC0601687 | ZBTB2    | 57621  | zinc finger and BTB domain containing    | 1.23E-12 | 2 | 5.29 | 5.35 | 5.46 | 5.61 | 5.57 | 5.62 | 5.69 | 5.63 |
| TC0X00536 | ZBTB33   | 10009  | zinc finger and BTB domain containing    | 8.76E-05 | 2 | 4.65 | 5.11 | 5.11 | 5.03 | 5.07 | 5.04 | 5.17 | 5.23 |
| TC0901314 | ZBTB6    | 10773  | zinc finger and BTB domain containing    | 8.56E-07 | 2 | 3.92 | 4.30 | 4.54 | 4.37 | 4.26 | 4.55 | 4.55 | 4.70 |
| TC0102082 | ZBTB8OS  | 731379 | // zinc finger and BTB domain containing | 8.21E-08 | 2 | 5.13 | 5.42 | 5.68 | 5.73 | 5.70 | 5.63 | 5.70 | 5.66 |
| TC1100829 | ZC3H12C  | 85463  | zinc finger CCCH-type containing 12C     | 6.01E-05 | 2 | 2.89 | 2.80 | 2.72 | 2.91 | 3.21 | 3.11 | 3.08 | 3.03 |

|            |                |        |                                            |          |   |      |       |      |       |       |       |       |      |
|------------|----------------|--------|--------------------------------------------|----------|---|------|-------|------|-------|-------|-------|-------|------|
| TC1400424  | ZC3H14         | 79882  | zinc finger CCCH-type containing 14 ///    | 5.17E-05 | 2 | 4.22 | 4.32  | 4.33 | 4.53  | 4.60  | 4.61  | 4.73  | 4.56 |
| TC0200925  | ZC3H15         | 55854  | zinc finger CCCH-type containing 15 ///    | 1.33E-09 | 2 | 6.80 | 7.31  | 7.48 | 7.47  | 7.44  | 7.50  | 7.61  | 7.49 |
| TC0200582  | ZC3H6          | 376940 | zinc finger CCCH-type containing 6         | 1.99E-06 | 2 | 5.89 | 6.33  | 6.52 | 6.55  | 6.43  | 6.54  | 6.61  | 6.49 |
| TC0201826  | ZC3H8          | 84524  | zinc finger CCCH-type containing 8         | 0.000322 | 2 | 4.28 | 4.35  | 4.39 | 4.52  | 4.60  | 4.59  | 4.65  | 4.55 |
| TC0100342  | ZCCHC17        | 51538  | zinc finger, CCHC domain containing 17     | 2.61E-08 | 2 | 4.80 | 5.96  | 5.81 | 5.91  | 6.07  | 6.12  | 6.15  | 5.92 |
| TC0500312  | ZCCHC9         | 84240  | zinc finger, CCHC domain containing 9      | 6.94E-07 | 2 | 6.01 | 6.26  | 6.08 | 6.06  | 6.06  | 6.21  | 6.34  | 6.31 |
| TC1201115  | ZCRB1          | 85437  | zinc finger CCHC-type and RNA binding      | 1.50E-14 | 2 | 4.53 | 5.56  | 5.75 | 5.80  | 5.78  | 5.79  | 5.92  | 5.75 |
| TC0700056  | ZDHH4          | 55146  | zinc finger, DHHC-type containing 4        | 6.45E-06 | 2 | 4.48 | 4.60  | 4.68 | 4.71  | 4.79  | 4.75  | 4.76  | 4.74 |
| TC0801072  | ZFAND1         | 79752  | zinc finger, AN1-type domain 1             | 4.78E-07 | 2 | 4.88 | 4.87  | 4.88 | 5.02  | 5.08  | 5.15  | 5.19  | 5.20 |
| TC1800312  | ZFP161         | 7541   | zinc finger protein 161 homolog (mous      | 0.000195 | 2 | 4.69 | 4.87  | 4.94 | 5.03  | 5.01  | 4.95  | 5.02  | 4.94 |
| TC0500537  | ZMAT2          | 153527 | zinc finger, matrin type 2                 | 3.71E-05 | 2 | 7.69 | 8.07  | 8.01 | 8.27  | 8.14  | 8.11  | 8.13  | 8.10 |
| TC0100427  | ZMPSTE24       | 10269  | zinc metalloproteinase (STE24 homolog,     | 8.93E-05 | 2 | 6.96 | 7.03  | 7.38 | 7.41  | 7.27  | 7.28  | 7.24  | 7.31 |
| TC0100386  | ZMYM4          | 9202   | zinc finger, MYM-type 4 /// zinc finger    | 2.12E-12 | 2 | 4.27 | 5.33  | 5.28 | 5.24  | 5.43  | 5.40  | 5.42  | 5.20 |
| TC1901145  | ZNF121         | 7675   | zinc finger protein 121                    | 1.78E-06 | 2 | 3.80 | 3.73  | 3.67 | 4.00  | 4.18  | 4.08  | 4.24  | 4.09 |
| TC0601046  | ZNF184         | 7738   | zinc finger protein 184                    | 1.58E-05 | 2 | 4.33 | 4.39  | 4.46 | 4.47  | 4.48  | 4.53  | 4.72  | 4.64 |
| TC1101087  | ZNF195         | 7748   | zinc finger protein 195 /// Zinc finger p  | 0.000289 | 2 | 3.75 | 3.79  | 3.81 | 3.84  | 3.89  | 3.85  | 4.01  | 3.89 |
| TC0X01233  | ZNF280C /// SL | 55609  | zinc finger protein 280C /// Suppressor    | 0.0001   | 2 | 3.12 | 3.44  | 3.50 | 3.45  | 3.51  | 3.51  | 3.55  | 3.49 |
| TC1900422  | ZNF302         | 55900  | zinc finger protein 302 /// Zinc finger p  | 0.000432 | 2 | 4.15 | 4.45  | 4.40 | 4.27  | 4.26  | 4.35  | 4.56  | 4.49 |
| TC0901161  | ZNF367         | 195828 | zinc finger protein 367                    | 1.74E-05 | 2 | 3.96 | 4.17  | 4.08 | 4.27  | 4.44  | 4.42  | 4.35  | 4.25 |
| TC0901164  | ZNF510         | 22869  | zinc finger protein 510                    | 0.000145 | 2 | 3.56 | 3.62  | 3.69 | 3.77  | 3.79  | 3.80  | 3.87  | 3.79 |
| TC0501249  | ZNF608         | 57507  | zinc finger protein 608                    | 0.000394 | 2 | 3.88 | 4.83  | 4.83 | 5.08  | 5.24  | 5.40  | 5.24  | 4.75 |
| TC0300817  | ZNF639         | 51193  | zinc finger protein 639                    | 3.45E-07 | 2 | 3.93 | 4.30  | 4.27 | 4.42  | 4.55  | 4.44  | 4.52  | 4.33 |
| TC0100431  | ZNF642         | 339559 | zinc finger protein 642                    | 0.000363 | 2 | 3.29 | 3.33  | 3.30 | 3.34  | 3.40  | 3.44  | 3.53  | 3.40 |
| TC1601015  | ZNF768         | 79724  | zinc finger protein 768 /// zinc finger pi | 1.55E-10 | 2 | 6.01 | 6.23  | 6.25 | 6.38  | 6.50  | 6.45  | 6.44  | 6.46 |
| TC1300300  | ZNF828         | 283489 | zinc finger protein 828                    | 5.08E-06 | 2 | 3.97 | 4.20  | 4.23 | 4.25  | 4.39  | 4.33  | 4.31  | 4.18 |
| TC0700566  | ZNHIT1         | 10467  | zinc finger, HIT type 1                    | 2.18E-10 | 2 | 5.70 | 6.01  | 6.15 | 6.32  | 6.26  | 6.21  | 6.25  | 6.20 |
| TC0701520  | ZRF1           | 27000  | zuotin related factor 1 /// DnaJ homolc    | 4.18E-05 | 2 | 4.57 | 4.68  | 4.73 | 4.83  | 4.81  | 4.85  | 5.04  | 4.89 |
| TC1101845  | ZW10           | 9183   | ZW10, kinetochore associated, homolo       | 0.000857 | 2 | 3.29 | 3.29  | 3.38 | 3.41  | 3.53  | 3.58  | 3.60  | 3.49 |
| TC1500421  | ZWILCH         | 55055  | Zwilch, kinetochore associated, homolc     | 1.42E-06 | 2 | 3.28 | 3.40  | 3.43 | 3.61  | 3.73  | 3.75  | 3.71  | 3.66 |
| TC1000994  | ZWINT          | 11130  | ZW10 interactor /// ZW10 interactor (Z     | 0.000181 | 2 | 4.02 | 4.05  | 3.96 | 4.11  | 4.29  | 4.22  | 4.18  | 4.09 |
| TC0102374  | ZZZ3           | 26009  | zinc finger, ZZ-type containing 3 /// Zin  | 6.04E-09 | 2 | 3.53 | 3.52  | 3.54 | 3.70  | 3.84  | 3.78  | 3.85  | 3.71 |
| TC03r00009 | ---            | ---    | ---                                        | 1.36E-25 | 2 | 5.53 | 10.82 | 9.35 | 10.33 | 11.04 | 11.23 | 10.44 | 9.93 |
| TC1201091  | ---            | ---    | ---                                        | 6.32E-19 | 2 | 6.63 | 6.75  | 6.49 | 7.46  | 7.65  | 7.76  | 7.79  | 7.58 |
| TC0103307  | ---            | ---    | ---                                        | 9.95E-17 | 2 | 6.30 | 6.90  | 6.96 | 7.31  | 7.46  | 7.70  | 7.38  | 7.27 |

|           |        |          |   |      |       |       |       |       |       |       |       |
|-----------|--------|----------|---|------|-------|-------|-------|-------|-------|-------|-------|
| TC0901303 | 731515 | 7.63E-16 | 2 | 4.27 | 5.15  | 4.93  | 5.32  | 5.85  | 5.70  | 5.60  | 5.25  |
| TC1201629 | ---    | 2.71E-14 | 2 | 5.79 | 6.83  | 6.91  | 7.10  | 7.31  | 7.25  | 7.15  | 7.05  |
| TC1200140 | ---    | 7.44E-14 | 2 | 5.75 | 6.00  | 5.82  | 6.57  | 6.97  | 7.16  | 7.06  | 6.82  |
| TC1901069 | ---    | 4.24E-13 | 2 | 7.16 | 7.22  | 7.27  | 7.60  | 7.74  | 7.79  | 7.80  | 7.69  |
| TC0701426 | ---    | 2.43E-12 | 2 | 6.04 | 6.79  | 6.82  | 6.90  | 6.99  | 6.99  | 7.00  | 6.96  |
| TC0202124 | ---    | 1.11E-11 | 2 | 8.59 | 9.62  | 9.39  | 9.92  | 10.11 | 10.11 | 10.02 | 9.81  |
| TC0301461 | ---    | 1.50E-11 | 2 | 4.44 | 4.71  | 4.93  | 5.30  | 5.50  | 5.60  | 5.26  | 5.23  |
| TC0600130 | ---    | 1.75E-11 | 2 | 5.37 | 5.30  | 5.32  | 5.88  | 6.06  | 6.14  | 6.03  | 5.68  |
| TC1500380 | ---    | 2.17E-11 | 2 | 7.52 | 8.72  | 8.86  | 9.05  | 9.16  | 9.23  | 9.08  | 9.00  |
| TC0102003 | ---    | 3.95E-11 | 2 | 5.20 | 5.12  | 4.87  | 6.01  | 5.93  | 6.11  | 6.41  | 6.25  |
| TC1800387 | 643509 | 4.76E-11 | 2 | 4.34 | 5.64  | 5.73  | 6.40  | 6.80  | 6.42  | 6.34  | 5.83  |
| TC1800170 | ---    | 5.48E-11 | 2 | 2.14 | 4.02  | 4.22  | 4.32  | 4.46  | 4.53  | 4.43  | 4.16  |
| TC1701738 | ---    | 5.82E-11 | 2 | 3.99 | 4.80  | 4.56  | 5.49  | 6.14  | 6.09  | 5.37  | 4.82  |
| TC0501199 | ---    | 8.81E-11 | 2 | 6.07 | 6.52  | 6.45  | 6.62  | 6.59  | 6.59  | 6.49  | 6.46  |
| TC0102470 | 653949 | 1.37E-10 | 2 | 5.04 | 5.97  | 6.02  | 6.21  | 6.35  | 6.43  | 6.37  | 6.06  |
| TC1400039 | ---    | 1.89E-10 | 2 | 3.25 | 5.24  | 4.87  | 5.94  | 6.37  | 6.33  | 6.19  | 5.20  |
| TC0200936 | ---    | 1.91E-10 | 2 | 8.56 | 8.55  | 8.69  | 8.86  | 8.77  | 8.89  | 8.91  | 8.95  |
| TC0100092 | ---    | 2.48E-10 | 2 | 7.40 | 7.50  | 7.42  | 7.87  | 8.19  | 8.36  | 8.17  | 8.05  |
| TC0102623 | ---    | 2.61E-10 | 2 | 7.12 | 7.18  | 7.21  | 7.48  | 7.46  | 7.62  | 7.66  | 7.74  |
| TC2000110 | ---    | 2.72E-10 | 2 | 8.51 | 9.17  | 9.46  | 9.63  | 9.65  | 9.76  | 9.72  | 9.70  |
| TC1700687 | ---    | 3.22E-10 | 2 | 4.76 | 4.81  | 4.64  | 5.70  | 6.00  | 5.73  | 5.70  | 4.92  |
| TC1500883 | ---    | 5.78E-10 | 2 | 5.50 | 6.42  | 6.51  | 6.56  | 6.55  | 6.77  | 6.68  | 6.57  |
| TC0801148 | ---    | 7.02E-10 | 2 | 6.17 | 5.66  | 5.98  | 6.43  | 6.60  | 6.52  | 6.56  | 6.40  |
| TC0400135 | ---    | 7.93E-10 | 2 | 5.22 | 5.25  | 5.27  | 5.92  | 6.07  | 6.02  | 5.96  | 5.85  |
| TC0102628 | ---    | 7.95E-10 | 2 | 7.20 | 7.22  | 7.49  | 8.01  | 8.01  | 8.01  | 7.92  | 7.89  |
| TC1701057 | ---    | 1.01E-09 | 2 | 5.01 | 5.19  | 5.34  | 5.59  | 5.78  | 5.77  | 5.87  | 5.54  |
| TC1600952 | ---    | 1.29E-09 | 2 | 8.07 | 8.11  | 8.01  | 8.54  | 8.84  | 9.04  | 8.89  | 8.66  |
| TCOM00001 | ---    | 1.35E-09 | 2 | 9.98 | 10.62 | 10.63 | 11.03 | 11.04 | 10.93 | 10.85 | 10.69 |
| TC1501180 | ---    | 1.86E-09 | 2 | 7.33 | 8.31  | 8.27  | 8.47  | 8.68  | 8.63  | 8.61  | 8.31  |
| TC0500761 | ---    | 2.29E-09 | 2 | 7.07 | 7.56  | 7.49  | 7.82  | 7.84  | 7.90  | 7.99  | 7.91  |
| TC0102299 | ---    | 2.39E-09 | 2 | 8.34 | 8.44  | 7.92  | 8.48  | 8.76  | 8.84  | 8.84  | 8.69  |
| TC1701111 | ---    | 3.16E-09 | 2 | 7.29 | 8.28  | 8.37  | 8.31  | 8.38  | 8.42  | 8.46  | 8.28  |
| TC0800672 | ---    | 3.81E-09 | 2 | 3.82 | 4.54  | 4.20  | 4.57  | 4.74  | 4.88  | 4.55  | 4.43  |
| TCOX00011 | ---    | 4.77E-09 | 2 | 3.96 | 4.88  | 5.01  | 5.22  | 5.40  | 5.26  | 5.32  | 5.03  |

|           |     |          |   |      |      |      |       |       |       |       |       |
|-----------|-----|----------|---|------|------|------|-------|-------|-------|-------|-------|
| TC0301101 | --- | 4.91E-09 | 2 | 4.09 | 4.25 | 4.28 | 4.40  | 4.68  | 4.59  | 4.55  | 4.33  |
| TC0100703 | --- | 5.40E-09 | 2 | 6.30 | 6.86 | 6.89 | 7.15  | 7.18  | 7.14  | 7.12  | 6.91  |
| TC0202077 | --- | 1.32E-08 | 2 | 4.81 | 4.76 | 4.72 | 5.00  | 5.18  | 5.23  | 5.27  | 5.15  |
| TC0101745 | --- | 1.46E-08 | 2 | 2.80 | 3.76 | 3.96 | 4.02  | 4.12  | 4.13  | 4.00  | 3.82  |
| TC0301616 | --- | 1.48E-08 | 2 | 7.24 | 7.26 | 7.11 | 7.64  | 7.91  | 8.11  | 7.85  | 7.80  |
| TC1500501 | --- | 1.60E-08 | 2 | 5.02 | 5.48 | 5.43 | 5.74  | 5.93  | 6.00  | 6.02  | 5.76  |
| TC0800990 | --- | 1.67E-08 | 2 | 6.74 | 7.18 | 7.11 | 7.62  | 7.86  | 7.87  | 7.98  | 7.62  |
| TC0501230 | --- | 1.68E-08 | 2 | 5.22 | 5.13 | 4.98 | 5.38  | 5.70  | 5.88  | 5.70  | 5.62  |
| TCOM00030 | --- | 1.97E-08 | 2 | 4.81 | 6.15 | 6.29 | 6.34  | 6.51  | 6.44  | 6.42  | 6.21  |
| TC1600761 | --- | 2.64E-08 | 2 | 4.67 | 4.35 | 4.16 | 4.86  | 5.15  | 5.12  | 4.99  | 4.35  |
| TC2000100 | --- | 2.89E-08 | 2 | 3.79 | 3.83 | 3.78 | 4.00  | 4.38  | 4.29  | 4.25  | 4.32  |
| TC1500136 | --- | 3.02E-08 | 2 | 9.27 | 9.05 | 9.00 | 9.49  | 9.87  | 10.03 | 9.75  | 9.66  |
| TC1700292 | --- | 4.84E-08 | 2 | 6.21 | 6.85 | 6.79 | 7.03  | 7.18  | 6.99  | 7.13  | 6.94  |
| TC0701404 | --- | 5.05E-08 | 2 | 4.77 | 4.57 | 4.43 | 5.33  | 5.68  | 6.06  | 6.00  | 5.92  |
| TC0100303 | --- | 5.15E-08 | 2 | 4.90 | 5.61 | 5.40 | 5.95  | 5.96  | 5.97  | 5.95  | 5.72  |
| TC1201335 | --- | 5.96E-08 | 2 | 6.75 | 6.92 | 7.14 | 7.29  | 7.38  | 7.71  | 7.72  | 7.69  |
| TCOM00007 | --- | 6.26E-08 | 2 | 3.51 | 5.25 | 5.36 | 5.79  | 5.97  | 5.98  | 5.77  | 5.53  |
| TC1400269 | --- | 7.70E-08 | 2 | 3.16 | 3.88 | 3.83 | 4.11  | 4.25  | 4.29  | 4.08  | 4.08  |
| TC0900055 | --- | 7.80E-08 | 2 | 6.37 | 6.91 | 6.81 | 7.02  | 7.11  | 7.10  | 7.12  | 6.92  |
| TC0301308 | --- | 8.33E-08 | 2 | 4.79 | 4.91 | 4.81 | 4.90  | 4.97  | 5.10  | 5.17  | 5.11  |
| TC2000125 | --- | 8.98E-08 | 2 | 6.70 | 7.06 | 7.27 | 7.31  | 7.34  | 7.48  | 7.48  | 7.49  |
| TC1701046 | --- | 9.30E-08 | 2 | 5.64 | 6.36 | 6.23 | 6.68  | 6.84  | 6.80  | 6.74  | 6.53  |
| TC1800317 | --- | 9.93E-08 | 2 | 9.34 | 9.88 | 9.69 | 10.14 | 10.26 | 10.25 | 10.33 | 10.14 |
| TC1601103 | --- | 1.04E-07 | 2 | 4.78 | 4.82 | 4.67 | 5.00  | 5.42  | 5.54  | 5.54  | 5.32  |
| TC1201417 | --- | 1.28E-07 | 2 | 2.98 | 3.60 | 3.54 | 3.75  | 3.85  | 3.89  | 4.00  | 3.78  |
| TC0100012 | --- | 1.40E-07 | 2 | 6.36 | 7.47 | 7.71 | 8.49  | 8.64  | 8.11  | 8.07  | 7.96  |
| TC0501017 | --- | 1.82E-07 | 2 | 3.05 | 3.36 | 3.16 | 3.81  | 4.33  | 4.32  | 4.10  | 3.79  |
| TC0701052 | --- | 1.88E-07 | 2 | 7.86 | 8.89 | 8.83 | 9.03  | 9.15  | 9.16  | 8.97  | 8.83  |
| TC1200490 | --- | 2.06E-07 | 2 | 7.72 | 8.33 | 8.44 | 8.48  | 8.42  | 8.43  | 8.63  | 8.53  |
| TC0200872 | --- | 2.17E-07 | 2 | 3.62 | 3.93 | 3.95 | 4.02  | 4.30  | 4.38  | 4.56  | 4.25  |
| TC0200095 | --- | 2.29E-07 | 2 | 4.53 | 4.67 | 4.66 | 4.97  | 5.17  | 5.37  | 5.08  | 5.15  |
| TC0301594 | --- | 2.35E-07 | 2 | 4.12 | 4.00 | 4.20 | 4.54  | 4.53  | 4.62  | 4.56  | 4.42  |
| TC0501152 | --- | 2.56E-07 | 2 | 5.12 | 6.27 | 6.60 | 6.57  | 6.60  | 6.80  | 6.67  | 6.65  |
| TC1300490 | --- | 2.66E-07 | 2 | 6.49 | 6.03 | 6.36 | 6.64  | 6.70  | 6.35  | 6.28  | 6.15  |

|           |        |          |   |      |       |       |       |       |       |       |       |
|-----------|--------|----------|---|------|-------|-------|-------|-------|-------|-------|-------|
| TC0601508 | ---    | 2.83E-07 | 2 | 5.94 | 6.42  | 6.65  | 6.60  | 6.61  | 6.59  | 6.66  | 6.59  |
| TC0201745 | 730995 | 3.08E-07 | 2 | 3.04 | 3.07  | 2.94  | 3.20  | 3.55  | 3.52  | 3.56  | 3.22  |
| TC0301405 | ---    | 3.13E-07 | 2 | 8.97 | 9.72  | 9.42  | 10.04 | 10.18 | 10.19 | 10.06 | 9.90  |
| TC1500736 | ---    | 3.15E-07 | 2 | 4.72 | 5.59  | 5.34  | 6.09  | 6.21  | 6.34  | 6.18  | 5.80  |
| TC0202157 | ---    | 3.78E-07 | 2 | 3.67 | 3.97  | 4.09  | 4.21  | 4.29  | 4.44  | 4.41  | 4.52  |
| TC0800531 | ---    | 5.02E-07 | 2 | 3.84 | 4.79  | 4.48  | 5.78  | 6.54  | 6.71  | 6.10  | 6.25  |
| TC0100309 | ---    | 6.34E-07 | 2 | 8.72 | 9.00  | 9.13  | 9.16  | 9.16  | 9.28  | 9.29  | 9.32  |
| TC0601700 | ---    | 6.90E-07 | 2 | 8.28 | 9.14  | 9.14  | 9.50  | 9.52  | 9.47  | 9.47  | 9.23  |
| TC0101116 | ---    | 8.92E-07 | 2 | 4.20 | 4.31  | 4.32  | 4.56  | 4.86  | 4.94  | 4.77  | 4.70  |
| TC0701788 | ---    | 9.15E-07 | 2 | 6.45 | 6.35  | 6.44  | 6.90  | 6.80  | 6.94  | 7.09  | 7.04  |
| TCOM00021 | ---    | 1.01E-06 | 2 | 7.51 | 8.81  | 8.70  | 9.36  | 9.74  | 9.50  | 9.59  | 9.15  |
| TC1501172 | ---    | 1.01E-06 | 2 | 8.43 | 9.14  | 9.18  | 9.32  | 9.50  | 9.47  | 9.45  | 9.22  |
| TC1500050 | ---    | 1.03E-06 | 2 | 3.67 | 4.72  | 4.73  | 4.86  | 5.19  | 4.85  | 5.04  | 4.79  |
| TC0201797 | ---    | 1.16E-06 | 2 | 3.69 | 3.88  | 3.80  | 4.23  | 4.61  | 4.69  | 4.79  | 4.64  |
| TC0601390 | ---    | 1.19E-06 | 2 | 9.48 | 10.08 | 10.05 | 10.22 | 10.32 | 10.30 | 10.22 | 10.16 |
| TCOX00821 | ---    | 1.26E-06 | 2 | 7.28 | 8.05  | 7.99  | 8.17  | 8.27  | 8.25  | 8.23  | 8.15  |
| TC1400156 | ---    | 1.38E-06 | 2 | 4.16 | 5.43  | 5.56  | 5.45  | 5.64  | 5.74  | 5.77  | 5.51  |
| TC1001119 | ---    | 1.39E-06 | 2 | 4.98 | 5.62  | 5.70  | 5.56  | 5.75  | 5.77  | 5.83  | 5.74  |
| TC0900843 | ---    | 1.43E-06 | 2 | 6.36 | 7.00  | 6.96  | 7.11  | 7.25  | 7.14  | 7.25  | 7.06  |
| TC0301013 | ---    | 1.43E-06 | 2 | 3.66 | 3.76  | 3.55  | 3.87  | 4.24  | 4.19  | 4.10  | 3.79  |
| TC1200204 | ---    | 1.59E-06 | 2 | 5.91 | 6.53  | 6.51  | 6.65  | 6.62  | 6.64  | 6.79  | 6.70  |
| TCOM00016 | ---    | 1.67E-06 | 2 | 3.64 | 5.14  | 4.78  | 5.70  | 5.74  | 5.94  | 5.84  | 5.85  |
| TC0701392 | ---    | 1.76E-06 | 2 | 4.29 | 4.36  | 4.46  | 4.70  | 4.79  | 4.91  | 4.95  | 4.74  |
| TC0500678 | ---    | 1.78E-06 | 2 | 3.71 | 4.45  | 4.22  | 5.00  | 5.11  | 5.17  | 5.09  | 4.79  |
| TC1401067 | ---    | 2.13E-06 | 2 | 4.24 | 4.26  | 4.06  | 4.26  | 4.60  | 4.47  | 4.58  | 4.37  |
| TC0301307 | ---    | 2.18E-06 | 2 | 4.21 | 4.96  | 4.67  | 5.09  | 5.41  | 5.42  | 5.29  | 5.10  |
| TC0101375 | ---    | 2.40E-06 | 2 | 6.13 | 6.59  | 6.66  | 6.78  | 6.68  | 6.82  | 6.79  | 6.79  |
| TC0300879 | ---    | 2.48E-06 | 2 | 4.81 | 5.69  | 5.58  | 5.89  | 5.87  | 6.05  | 5.92  | 5.88  |
| TC0100237 | ---    | 2.56E-06 | 2 | 4.11 | 4.15  | 4.33  | 4.48  | 4.49  | 4.46  | 4.52  | 4.43  |
| TC0101624 | ---    | 2.71E-06 | 2 | 5.28 | 5.33  | 5.20  | 5.61  | 5.79  | 5.74  | 5.78  | 5.54  |
| TC0500975 | ---    | 3.38E-06 | 2 | 3.34 | 3.72  | 4.43  | 4.74  | 4.37  | 4.34  | 4.26  | 4.17  |
| TC0201379 | ---    | 3.44E-06 | 2 | 8.08 | 8.82  | 8.78  | 8.91  | 9.13  | 9.27  | 8.99  | 9.12  |
| TC0200186 | ---    | 3.77E-06 | 2 | 6.55 | 7.00  | 6.76  | 7.14  | 7.36  | 7.30  | 7.22  | 6.86  |
| TC0700094 | ---    | 4.47E-06 | 2 | 9.93 | 10.23 | 10.11 | 10.32 | 10.42 | 10.46 | 10.56 | 10.37 |

|            |        |          |   |       |       |       |       |       |       |       |       |
|------------|--------|----------|---|-------|-------|-------|-------|-------|-------|-------|-------|
| TC1501078  | 650327 | 4.49E-06 | 2 | 7.95  | 8.70  | 8.85  | 8.99  | 9.03  | 9.12  | 8.98  | 8.72  |
| TC0201024  | ---    | 4.62E-06 | 2 | 7.49  | 7.51  | 7.26  | 7.83  | 7.88  | 7.98  | 8.02  | 7.80  |
| TC0201812  | ---    | 4.65E-06 | 2 | 5.35  | 5.64  | 5.24  | 5.67  | 5.86  | 5.90  | 5.81  | 5.78  |
| TC1700524  | ---    | 4.88E-06 | 2 | 8.69  | 9.22  | 9.18  | 9.35  | 9.52  | 9.48  | 9.50  | 9.29  |
| TC0X00644  | ---    | 5.12E-06 | 2 | 8.29  | 8.67  | 8.49  | 8.64  | 8.66  | 8.80  | 8.67  | 8.72  |
| TC0200557  | ---    | 5.39E-06 | 2 | 4.01  | 4.51  | 4.27  | 4.66  | 4.84  | 4.86  | 4.71  | 4.60  |
| TC0201967  | ---    | 5.58E-06 | 2 | 4.13  | 4.98  | 5.00  | 5.51  | 5.69  | 5.51  | 5.29  | 5.29  |
| TC0600298  | ---    | 5.71E-06 | 2 | 5.55  | 5.79  | 5.78  | 5.89  | 5.99  | 6.01  | 6.04  | 5.96  |
| TC1201711  | ---    | 5.87E-06 | 2 | 4.55  | 4.82  | 4.60  | 5.11  | 5.19  | 5.08  | 5.14  | 4.92  |
| TC0801113  | ---    | 6.11E-06 | 2 | 5.37  | 6.04  | 6.01  | 6.21  | 6.19  | 6.29  | 6.53  | 6.28  |
| TC1400987  | ---    | 6.35E-06 | 2 | 8.10  | 8.09  | 8.17  | 8.25  | 8.25  | 8.32  | 8.35  | 8.34  |
| TC0301096  | ---    | 6.52E-06 | 2 | 6.72  | 7.21  | 6.94  | 7.41  | 7.50  | 7.47  | 7.58  | 7.30  |
| TCOM00005  | ---    | 7.48E-06 | 2 | 9.28  | 9.46  | 9.70  | 9.81  | 9.89  | 9.78  | 9.72  | 9.70  |
| TC0601452  | ---    | 8.39E-06 | 2 | 6.70  | 6.85  | 7.10  | 7.29  | 7.42  | 7.56  | 7.34  | 7.22  |
| TC0600509  | ---    | 8.45E-06 | 2 | 11.40 | 11.81 | 11.78 | 11.89 | 11.91 | 11.93 | 11.92 | 11.79 |
| TC1500129  | ---    | 8.50E-06 | 2 | 5.12  | 5.65  | 5.75  | 5.72  | 5.76  | 5.87  | 5.78  | 5.70  |
| TC0500606  | ---    | 8.55E-06 | 2 | 6.92  | 7.66  | 7.64  | 7.93  | 7.96  | 8.11  | 8.20  | 7.86  |
| TC2200731  | ---    | 8.72E-06 | 2 | 6.03  | 6.06  | 5.79  | 6.23  | 6.39  | 6.43  | 6.63  | 6.26  |
| TC0201063  | ---    | 9.09E-06 | 2 | 3.59  | 3.76  | 3.88  | 4.13  | 4.42  | 4.39  | 4.49  | 4.09  |
| TC1100245  | ---    | 9.17E-06 | 2 | 6.84  | 7.33  | 7.48  | 7.50  | 7.51  | 7.71  | 7.70  | 7.66  |
| TC0900539  | 731589 | 1.01E-05 | 2 | 1.95  | 2.00  | 2.07  | 2.14  | 2.29  | 2.24  | 2.24  | 2.15  |
| TC0700836  | ---    | 1.07E-05 | 2 | 1.94  | 3.51  | 2.52  | 2.57  | 3.09  | 3.30  | 3.31  | 2.44  |
| TC0200437  | ---    | 1.07E-05 | 2 | 5.50  | 6.08  | 6.10  | 6.73  | 6.74  | 6.62  | 6.72  | 6.55  |
| TC0100011  | ---    | 1.13E-05 | 2 | 5.74  | 6.59  | 6.74  | 7.05  | 7.25  | 7.25  | 7.06  | 6.90  |
| TC1600429  | ---    | 1.40E-05 | 2 | 6.43  | 6.97  | 6.74  | 7.02  | 7.23  | 7.24  | 7.26  | 7.02  |
| TC0700448  | ---    | 1.65E-05 | 2 | 4.40  | 4.39  | 4.38  | 4.65  | 4.79  | 4.83  | 4.75  | 4.73  |
| TC2000386  | 731959 | 1.65E-05 | 2 | 7.73  | 7.94  | 7.73  | 8.25  | 8.34  | 8.38  | 8.48  | 8.15  |
| TC2000596  | ---    | 1.95E-05 | 2 | 4.49  | 4.92  | 4.94  | 5.17  | 5.32  | 5.35  | 5.48  | 5.16  |
| TC03r00001 | ---    | 2.21E-05 | 2 | 4.44  | 4.75  | 4.98  | 5.28  | 5.17  | 5.11  | 5.10  | 4.92  |
| TC0401400  | ---    | 2.24E-05 | 2 | 2.20  | 2.36  | 2.48  | 2.38  | 2.46  | 2.43  | 2.38  | 2.64  |
| TC0901010  | ---    | 2.29E-05 | 2 | 5.01  | 5.29  | 5.49  | 5.67  | 5.66  | 5.65  | 5.58  | 5.50  |
| TC1101800  | ---    | 2.36E-05 | 2 | 4.46  | 5.44  | 5.67  | 5.65  | 5.47  | 5.71  | 5.87  | 5.72  |
| TC0101743  | ---    | 2.42E-05 | 2 | 9.60  | 9.83  | 10.01 | 10.25 | 10.41 | 10.33 | 10.19 | 9.99  |
| TC1601111  | ---    | 2.60E-05 | 2 | 2.63  | 2.70  | 2.64  | 2.81  | 3.15  | 2.95  | 2.85  | 2.84  |

|            |        |          |   |       |       |       |       |       |       |       |       |
|------------|--------|----------|---|-------|-------|-------|-------|-------|-------|-------|-------|
| TCOM00034  | ---    | 2.88E-05 | 2 | 7.27  | 7.63  | 7.73  | 8.21  | 8.30  | 8.34  | 8.24  | 8.01  |
| TC0101413  | ---    | 3.09E-05 | 2 | 5.64  | 6.01  | 5.82  | 6.27  | 6.44  | 6.35  | 6.34  | 6.11  |
| TC1300592  | ---    | 3.34E-05 | 2 | 4.73  | 4.82  | 5.04  | 5.29  | 5.36  | 5.54  | 5.52  | 5.42  |
| TC0601104  | ---    | 3.56E-05 | 2 | 7.44  | 7.79  | 7.50  | 7.82  | 8.14  | 8.15  | 8.03  | 7.94  |
| TC0900382  | ---    | 3.83E-05 | 2 | 4.50  | 4.89  | 5.08  | 5.20  | 5.38  | 5.56  | 5.53  | 5.33  |
| TC0701536  | ---    | 3.83E-05 | 2 | 4.59  | 4.74  | 4.72  | 5.09  | 5.19  | 5.35  | 5.36  | 5.15  |
| TC0601181  | 731959 | 3.97E-05 | 2 | 5.64  | 5.93  | 5.63  | 6.08  | 6.19  | 6.24  | 6.32  | 6.09  |
| TC0100666  | ---    | 4.08E-05 | 2 | 7.64  | 8.18  | 8.28  | 8.41  | 8.53  | 8.55  | 8.48  | 8.27  |
| TC0501296  | ---    | 4.17E-05 | 2 | 7.68  | 8.36  | 8.73  | 8.72  | 8.93  | 9.11  | 8.92  | 8.70  |
| TC0X01384  | ---    | 4.22E-05 | 2 | 6.25  | 6.55  | 6.61  | 6.69  | 6.73  | 6.66  | 6.63  | 6.48  |
| TC0700286  | ---    | 4.61E-05 | 2 | 5.30  | 5.74  | 5.92  | 6.20  | 6.40  | 6.35  | 6.18  | 6.14  |
| TC1701129  | ---    | 5.00E-05 | 2 | 4.61  | 4.94  | 5.01  | 5.02  | 5.20  | 5.19  | 5.22  | 4.99  |
| TC0500381  | ---    | 5.04E-05 | 2 | 5.48  | 6.31  | 6.46  | 6.52  | 6.72  | 6.87  | 6.89  | 6.59  |
| TC1100543  | 649618 | 5.25E-05 | 2 | 4.20  | 4.25  | 4.47  | 4.71  | 4.65  | 4.50  | 4.44  | 4.28  |
| TC0601543  | ---    | 5.29E-05 | 2 | 2.55  | 3.23  | 3.21  | 3.35  | 3.47  | 3.56  | 3.50  | 3.00  |
| TC0200426  | ---    | 5.43E-05 | 2 | 3.35  | 3.38  | 3.35  | 3.69  | 3.70  | 3.76  | 3.80  | 3.67  |
| TCOM00013  | ---    | 5.90E-05 | 2 | 3.28  | 4.79  | 4.39  | 5.00  | 5.21  | 4.88  | 5.39  | 5.01  |
| TC0100013  | ---    | 5.99E-05 | 2 | 2.67  | 3.59  | 3.79  | 4.20  | 4.35  | 4.18  | 4.32  | 4.08  |
| TC0801137  | ---    | 6.16E-05 | 2 | 4.20  | 4.39  | 4.11  | 4.40  | 5.07  | 5.05  | 4.94  | 4.76  |
| TC1400755  | ---    | 6.27E-05 | 2 | 2.09  | 2.19  | 2.06  | 2.34  | 2.51  | 2.54  | 2.32  | 2.33  |
| TCOM00022  | ---    | 7.08E-05 | 2 | 5.90  | 6.01  | 5.74  | 6.49  | 6.69  | 6.72  | 6.73  | 6.56  |
| TCOM00028  | ---    | 7.24E-05 | 2 | 9.89  | 10.09 | 10.38 | 10.53 | 10.75 | 10.64 | 10.49 | 10.32 |
| TC1000477  | ---    | 7.30E-05 | 2 | 9.61  | 9.77  | 9.69  | 10.18 | 10.22 | 10.23 | 10.20 | 10.04 |
| TC0100753  | ---    | 7.73E-05 | 2 | 3.34  | 3.91  | 3.85  | 3.96  | 4.11  | 4.13  | 4.09  | 3.96  |
| TCOM00020  | ---    | 7.91E-05 | 2 | 10.92 | 11.20 | 11.44 | 11.60 | 11.76 | 11.88 | 11.76 | 11.52 |
| TC0101432  | ---    | 7.96E-05 | 2 | 6.37  | 6.73  | 6.51  | 6.28  | 6.68  | 6.85  | 6.63  | 6.77  |
| TC0301531  | ---    | 7.98E-05 | 2 | 5.20  | 5.29  | 5.36  | 5.56  | 5.71  | 5.69  | 5.56  | 5.29  |
| TC1000850  | ---    | 8.85E-05 | 2 | 4.70  | 5.00  | 5.24  | 5.12  | 5.21  | 5.13  | 5.41  | 5.13  |
| TC05r00002 | ---    | 9.32E-05 | 2 | 5.09  | 5.20  | 5.23  | 5.36  | 5.49  | 5.50  | 5.71  | 5.38  |
| TC0600234  | ---    | 9.63E-05 | 2 | 4.29  | 4.42  | 4.47  | 4.40  | 4.40  | 4.49  | 4.49  | 4.57  |
| TC1100177  | ---    | 0.000106 | 2 | 5.08  | 5.51  | 5.82  | 5.97  | 5.79  | 5.89  | 5.86  | 5.81  |
| TC1601288  | ---    | 0.000113 | 2 | 7.24  | 7.99  | 7.77  | 8.05  | 7.87  | 7.87  | 8.07  | 8.14  |
| TC1001077  | ---    | 0.000128 | 2 | 5.67  | 5.92  | 5.86  | 6.08  | 6.22  | 6.24  | 6.14  | 6.23  |
| TC0100951  | ---    | 0.000128 | 2 | 5.92  | 6.00  | 5.89  | 6.30  | 6.05  | 6.23  | 6.42  | 6.39  |



|           |     |          |   |      |      |      |      |      |      |      |      |
|-----------|-----|----------|---|------|------|------|------|------|------|------|------|
| TC0201562 | --- | 0.000129 | 2 | 5.08 | 5.60 | 5.62 | 5.61 | 5.56 | 5.77 | 5.71 | 5.81 |
| TC0301913 | --- | 0.00013  | 2 | 8.32 | 8.66 | 8.75 | 8.86 | 8.95 | 8.90 | 8.94 | 8.74 |
| TC0101250 | --- | 0.000135 | 2 | 3.81 | 4.29 | 4.32 | 4.55 | 4.57 | 4.59 | 4.67 | 4.41 |
| TC0601061 | --- | 0.000135 | 2 | 5.20 | 5.31 | 5.46 | 5.50 | 5.60 | 5.57 | 5.54 | 5.44 |
| TC0900473 | --- | 0.000137 | 2 | 4.55 | 5.05 | 4.92 | 5.42 | 5.35 | 5.24 | 5.25 | 5.12 |
| TC0201596 | --- | 0.000138 | 2 | 4.16 | 4.42 | 4.24 | 4.77 | 5.09 | 5.13 | 4.98 | 4.86 |
| TC0X00277 | --- | 0.000146 | 2 | 2.06 | 2.08 | 2.43 | 2.47 | 2.44 | 2.32 | 2.31 | 2.20 |
| TC0M00008 | --- | 0.000147 | 2 | 8.70 | 8.75 | 8.85 | 9.29 | 9.49 | 9.25 | 9.13 | 9.05 |
| TC1701808 | --- | 0.00015  | 2 | 5.12 | 5.05 | 5.30 | 5.68 | 5.83 | 5.51 | 5.58 | 5.32 |
| TC0700348 | --- | 0.000156 | 2 | 4.16 | 4.65 | 4.70 | 4.72 | 4.73 | 4.82 | 4.82 | 4.76 |
| TC1401058 | --- | 0.000158 | 2 | 8.97 | 9.16 | 9.11 | 9.28 | 9.38 | 9.41 | 9.42 | 9.28 |
| TC0103146 | --- | 0.000159 | 2 | 2.53 | 3.12 | 2.81 | 3.22 | 3.36 | 3.40 | 3.15 | 3.32 |
| TC0100899 | --- | 0.000159 | 2 | 7.23 | 7.44 | 7.47 | 7.80 | 8.00 | 8.27 | 7.70 | 7.90 |
| TC0800868 | --- | 0.000165 | 2 | 5.62 | 6.03 | 6.20 | 6.48 | 6.32 | 6.39 | 6.33 | 6.09 |
| TC0103272 | --- | 0.000169 | 2 | 4.74 | 5.71 | 5.53 | 5.24 | 5.57 | 5.70 | 5.94 | 5.58 |
| TC1601248 | --- | 0.00017  | 2 | 3.99 | 4.60 | 4.31 | 4.69 | 4.88 | 4.90 | 4.95 | 4.62 |
| TC1901870 | --- | 0.000174 | 2 | 5.60 | 5.48 | 5.57 | 5.83 | 5.87 | 5.94 | 5.99 | 5.92 |
| TC1101782 | --- | 0.000185 | 2 | 2.24 | 2.63 | 2.67 | 3.15 | 3.19 | 3.03 | 3.04 | 3.00 |
| TC0400762 | --- | 0.000187 | 2 | 5.74 | 6.01 | 6.26 | 6.43 | 6.32 | 6.36 | 6.29 | 6.27 |
| TC0500952 | --- | 0.000196 | 2 | 7.21 | 8.05 | 7.65 | 7.65 | 7.45 | 7.81 | 8.07 | 7.93 |
| TC1900269 | --- | 0.000199 | 2 | 5.67 | 6.12 | 5.92 | 6.31 | 6.44 | 6.57 | 6.59 | 6.37 |
| TC0M00018 | --- | 0.000202 | 2 | 5.44 | 5.98 | 5.87 | 6.42 | 6.43 | 6.29 | 6.33 | 6.28 |
| TC0103395 | --- | 0.000217 | 2 | 3.54 | 3.89 | 4.00 | 4.04 | 4.31 | 4.34 | 4.11 | 4.06 |
| TC0X00823 | --- | 0.000226 | 2 | 5.04 | 5.60 | 5.44 | 5.83 | 5.93 | 6.10 | 6.04 | 5.81 |
| TC0101921 | --- | 0.000227 | 2 | 5.54 | 6.51 | 6.24 | 6.41 | 6.66 | 6.80 | 6.61 | 6.53 |
| TC0701281 | --- | 0.000253 | 2 | 4.37 | 4.51 | 4.34 | 4.69 | 5.05 | 5.04 | 4.81 | 4.74 |
| TC1500133 | --- | 0.000259 | 2 | 4.20 | 4.50 | 4.47 | 4.56 | 4.60 | 4.54 | 4.52 | 4.45 |
| TC1901471 | --- | 0.000292 | 2 | 7.04 | 7.46 | 7.28 | 7.49 | 7.63 | 7.58 | 7.60 | 7.43 |
| TC0700839 | --- | 0.000313 | 2 | 4.29 | 4.46 | 4.20 | 4.17 | 4.44 | 4.51 | 4.39 | 4.25 |
| TC0100014 | --- | 0.000328 | 2 | 3.76 | 4.50 | 4.69 | 5.21 | 5.43 | 5.33 | 5.84 | 5.31 |
| TC1300333 | --- | 0.000328 | 2 | 2.23 | 2.13 | 2.21 | 2.42 | 2.50 | 2.46 | 2.42 | 2.35 |
| TC0201744 | --- | 0.000335 | 2 | 3.16 | 3.26 | 3.04 | 3.20 | 3.49 | 3.48 | 3.50 | 3.32 |
| TC0501113 | --- | 0.000336 | 2 | 2.84 | 3.36 | 3.37 | 3.61 | 3.64 | 3.61 | 3.63 | 3.31 |
| TC1800429 | --- | 0.000347 | 2 | 4.47 | 5.34 | 5.14 | 5.32 | 5.41 | 5.53 | 5.50 | 5.28 |

|            |     |          |   |      |      |       |       |       |       |       |       |
|------------|-----|----------|---|------|------|-------|-------|-------|-------|-------|-------|
| TC0701725  | --- | 0.000352 | 2 | 4.30 | 4.67 | 4.44  | 4.45  | 4.91  | 4.80  | 5.00  | 4.59  |
| TC1901126  | --- | 0.000357 | 2 | 4.21 | 4.26 | 4.24  | 4.46  | 4.56  | 4.62  | 4.58  | 4.41  |
| TC17r00051 | --- | 0.000359 | 2 | 5.22 | 5.56 | 5.36  | 5.54  | 5.63  | 5.62  | 5.72  | 5.64  |
| TC0401341  | --- | 0.000382 | 2 | 4.53 | 5.26 | 5.16  | 5.49  | 5.84  | 5.73  | 5.69  | 5.43  |
| TC1001317  | --- | 0.000389 | 2 | 9.48 | 9.74 | 9.59  | 9.87  | 9.93  | 10.05 | 10.08 | 9.90  |
| TC1200568  | --- | 0.000391 | 2 | 6.55 | 7.04 | 7.13  | 7.15  | 7.35  | 7.20  | 7.27  | 7.01  |
| TC1101200  | --- | 0.000393 | 2 | 9.64 | 9.79 | 10.21 | 10.09 | 10.20 | 10.18 | 10.09 | 10.01 |
| TC1500635  | --- | 0.000398 | 2 | 3.42 | 3.48 | 3.49  | 3.57  | 3.80  | 3.67  | 3.64  | 3.54  |
| TC1700042  | --- | 0.000421 | 2 | 6.43 | 6.57 | 6.72  | 6.82  | 6.54  | 7.31  | 7.33  | 7.22  |
| TC1501093  | --- | 0.00044  | 2 | 4.86 | 4.99 | 4.96  | 5.00  | 5.09  | 5.06  | 4.94  | 4.95  |
| TC1201377  | --- | 0.000441 | 2 | 4.01 | 4.58 | 4.33  | 4.81  | 4.98  | 5.03  | 5.02  | 4.70  |
| TC0100173  | --- | 0.000441 | 2 | 3.98 | 4.01 | 4.11  | 4.17  | 4.24  | 4.54  | 4.32  | 4.12  |
| TC2200219  | --- | 0.000444 | 2 | 5.14 | 5.60 | 5.57  | 5.79  | 6.05  | 6.10  | 6.20  | 5.95  |
| TC0102376  | --- | 0.000445 | 2 | 5.76 | 5.94 | 6.19  | 6.37  | 6.26  | 6.40  | 6.57  | 6.42  |
| TC0100400  | --- | 0.000453 | 2 | 7.05 | 7.87 | 7.69  | 7.92  | 8.01  | 8.02  | 8.05  | 8.05  |
| TC0201132  | --- | 0.000466 | 2 | 3.69 | 3.90 | 3.92  | 3.93  | 3.99  | 4.03  | 3.87  | 3.90  |
| TC0401245  | --- | 0.000484 | 2 | 5.65 | 6.01 | 6.09  | 6.10  | 6.11  | 6.24  | 6.33  | 6.22  |
| TC1900249  | --- | 0.000489 | 2 | 4.14 | 4.77 | 4.89  | 4.89  | 4.85  | 4.98  | 5.01  | 4.86  |
| TC1200150  | --- | 0.000492 | 2 | 6.25 | 6.67 | 6.70  | 6.86  | 6.98  | 6.99  | 6.89  | 6.83  |
| TC0300150  | --- | 0.000494 | 2 | 6.66 | 6.94 | 6.93  | 7.21  | 7.20  | 7.16  | 7.25  | 7.31  |
| TC1600936  | --- | 0.00052  | 2 | 4.73 | 4.90 | 4.84  | 4.85  | 5.01  | 4.97  | 5.03  | 4.92  |
| TC0501150  | --- | 0.000559 | 2 | 9.38 | 9.82 | 9.91  | 9.97  | 10.10 | 10.14 | 10.31 | 10.12 |
| TC0102694  | --- | 0.000567 | 2 | 6.80 | 6.71 | 6.76  | 6.99  | 7.14  | 7.33  | 7.06  | 7.19  |
| TC0501174  | --- | 0.000567 | 2 | 2.39 | 2.96 | 2.78  | 3.11  | 3.40  | 3.46  | 3.23  | 3.14  |
| TC1000798  | --- | 0.000588 | 2 | 7.05 | 6.73 | 7.22  | 7.49  | 7.23  | 7.49  | 7.33  | 7.36  |
| TC0501229  | --- | 0.000609 | 2 | 7.16 | 7.68 | 7.59  | 7.63  | 7.86  | 7.87  | 7.89  | 7.82  |
| TC1400450  | --- | 0.000617 | 2 | 2.91 | 3.32 | 3.27  | 3.18  | 3.21  | 3.55  | 3.53  | 3.36  |
| TC1800408  | --- | 0.000623 | 2 | 8.04 | 8.32 | 8.15  | 8.39  | 8.55  | 8.61  | 8.53  | 8.31  |
| TC1800504  | --- | 0.000639 | 2 | 4.91 | 5.10 | 4.94  | 4.90  | 5.13  | 5.38  | 5.43  | 5.35  |
| TC0400329  | --- | 0.000647 | 2 | 3.65 | 3.47 | 3.66  | 3.82  | 3.99  | 4.08  | 4.19  | 3.94  |
| TC0700843  | --- | 0.000673 | 2 | 5.18 | 5.50 | 5.60  | 5.77  | 5.97  | 5.95  | 5.77  | 5.73  |
| TC0500491  | --- | 0.000677 | 2 | 8.66 | 9.15 | 9.26  | 9.30  | 9.55  | 9.66  | 9.65  | 9.37  |
| TC0100794  | --- | 0.000678 | 2 | 8.25 | 8.41 | 8.45  | 8.68  | 8.71  | 8.64  | 8.70  | 8.49  |
| TC0101645  | --- | 0.000692 | 2 | 3.59 | 3.86 | 3.69  | 4.13  | 4.24  | 4.31  | 4.25  | 4.04  |

|            |        |                                               |          |   |      |      |      |      |      |      |      |      |
|------------|--------|-----------------------------------------------|----------|---|------|------|------|------|------|------|------|------|
| TC17r00038 | ---    |                                               | 0.000694 | 2 | 3.33 | 3.76 | 3.55 | 3.66 | 3.63 | 3.60 | 3.77 | 3.67 |
| TC0701113  | ---    |                                               | 0.000704 | 2 | 5.87 | 6.58 | 6.88 | 6.67 | 6.72 | 6.86 | 6.84 | 6.72 |
| TC01r00019 | ---    |                                               | 0.000709 | 2 | 6.50 | 6.72 | 6.72 | 6.71 | 6.77 | 6.80 | 6.81 | 6.78 |
| TC0700345  | ---    |                                               | 0.000745 | 2 | 4.85 | 4.77 | 4.80 | 5.13 | 5.14 | 5.00 | 5.00 | 5.01 |
| TC1300515  |        | 642209                                        | 0.000808 | 2 | 7.64 | 7.83 | 7.86 | 8.00 | 8.03 | 8.18 | 8.19 | 8.07 |
| TC0200796  | ---    |                                               | 0.000835 | 2 | 5.11 | 5.27 | 5.51 | 5.53 | 5.72 | 5.85 | 6.17 | 5.86 |
| TC0900408  | ---    |                                               | 0.000846 | 2 | 4.47 | 4.85 | 5.01 | 4.96 | 5.05 | 4.94 | 5.05 | 4.96 |
| TC1500567  | ---    |                                               | 0.000871 | 2 | 4.79 | 4.74 | 4.95 | 5.13 | 5.24 | 5.07 | 5.16 | 4.86 |
| TC2000868  | ---    |                                               | 0.000899 | 2 | 3.45 | 4.42 | 4.31 | 5.39 | 5.68 | 5.61 | 5.15 | 5.17 |
| TC1201287  | ---    |                                               | 0.000916 | 2 | 3.22 | 3.51 | 3.47 | 3.87 | 3.80 | 3.93 | 4.00 | 3.73 |
| TC0102619  | ---    |                                               | 0.00093  | 2 | 2.84 | 2.60 | 2.66 | 2.86 | 3.14 | 3.05 | 3.24 | 2.85 |
| TC0103360  | ---    |                                               | 0.000941 | 2 | 3.41 | 3.50 | 3.34 | 3.63 | 3.84 | 3.83 | 3.83 | 3.60 |
| TC0201907  | ---    |                                               | 0.000963 | 2 | 3.46 | 4.19 | 4.32 | 4.30 | 4.43 | 4.43 | 4.55 | 4.44 |
| TC0701522  | ---    |                                               | 0.000984 | 2 | 5.84 | 5.79 | 6.14 | 6.12 | 6.04 | 6.20 | 6.31 | 6.16 |
| TC1200808  | AACS   | 65985 acetoacetyl-CoA synthetase /// acetoac  | 3.77E-05 | 3 | 4.29 | 4.24 | 4.23 | 4.35 | 4.36 | 4.35 | 4.42 | 4.38 |
| TC1600210  | ABCC1  | 4363 ATP-binding cassette, sub-family C (CFT  | 0.000605 | 3 | 5.00 | 4.75 | 4.70 | 4.85 | 4.85 | 4.85 | 4.93 | 4.96 |
| TC0600247  | ABCF1  | 23 ATP-binding cassette, sub-family F (GCI    | 4.87E-08 | 3 | 5.72 | 5.55 | 5.56 | 5.75 | 5.82 | 5.89 | 6.08 | 5.94 |
| TC0300493  | ABHD10 | 55347 abhydrolase domain containing 10        | 1.27E-12 | 3 | 3.89 | 3.66 | 3.73 | 4.12 | 4.09 | 4.21 | 4.36 | 4.36 |
| TC1400086  | ABHD4  | 63874 abhydrolase domain containing 4         | 0.000131 | 3 | 6.12 | 5.72 | 5.55 | 5.82 | 5.73 | 5.92 | 5.86 | 6.00 |
| TC1200681  | ACACB  | 32 acetyl-Coenzyme A carboxylase beta //      | 0.000335 | 3 | 4.20 | 4.00 | 3.95 | 4.09 | 4.05 | 4.08 | 4.17 | 4.17 |
| TC0900113  | ACO1   | 48 aconitase 1, soluble /// Iron-responsive   | 6.04E-09 | 3 | 5.13 | 4.66 | 4.49 | 4.84 | 4.80 | 4.91 | 5.15 | 5.03 |
| TC0200001  | ACP1   | 52 acid phosphatase 1, soluble /// Low mc     | 4.91E-06 | 3 | 5.26 | 4.90 | 4.97 | 5.17 | 5.29 | 5.36 | 5.34 | 5.27 |
| TC1200909  | ACRBP  | 84519 acrosin binding protein                 | 0.000159 | 3 | 5.13 | 5.02 | 4.88 | 5.15 | 5.20 | 5.31 | 5.26 | 5.15 |
| TC1600234  | ACSM3  | 6296 acyl-CoA synthetase medium-chain far     | 1.47E-12 | 3 | 3.07 | 2.75 | 2.85 | 3.05 | 2.98 | 3.14 | 3.45 | 3.34 |
| TC1500996  | ADAM10 | 102 ADAM metalloproteinase domain 10          | 0.000225 | 3 | 8.59 | 8.35 | 8.68 | 8.70 | 8.54 | 8.61 | 8.55 | 8.55 |
| TC0700749  | ADCK2  | 90956 aarF domain containing kinase 2         | 0.000548 | 3 | 4.06 | 4.02 | 3.90 | 4.01 | 4.10 | 4.10 | 4.17 | 4.08 |
| TC1000349  | ADK    | 132 adenosine kinase                          | 8.33E-05 | 3 | 5.33 | 5.03 | 4.80 | 5.12 | 5.35 | 5.35 | 5.39 | 5.35 |
| TC1800286  | ADNP2  | 22850 ADNP homeobox 2                         | 0.000261 | 3 | 4.51 | 4.69 | 4.49 | 4.49 | 4.53 | 4.69 | 4.73 | 4.74 |
| TC0102542  | ADORA3 | 140 adenosine A3 receptor /// Adenosine A     | 3.74E-06 | 3 | 4.85 | 4.61 | 4.75 | 5.18 | 4.93 | 4.96 | 5.22 | 5.19 |
| TC0500591  | ADRB2  | 154 adrenergic, beta-2-, receptor, surface    | 3.46E-07 | 3 | 6.09 | 5.28 | 5.54 | 5.64 | 5.53 | 5.86 | 5.85 | 5.86 |
| TC2200153  | ADRBK2 | 157 adrenergic, beta, receptor kinase 2       | 2.99E-10 | 3 | 3.94 | 3.74 | 3.73 | 4.37 | 4.01 | 4.09 | 4.42 | 4.37 |
| TC0800014  | AGPAT5 | 55326 1-acylglycerol-3-phosphate O-acyltrans  | 2.37E-11 | 3 | 3.32 | 3.22 | 3.25 | 3.44 | 3.56 | 3.70 | 3.79 | 3.78 |
| TC1500808  | AGPAT7 | 254531 1-acylglycerol-3-phosphate O-acyltrans | 2.97E-05 | 3 | 4.96 | 4.71 | 4.79 | 5.06 | 4.94 | 4.93 | 4.92 | 4.89 |
| TC0700089  | AHR    | 196 aryl hydrocarbon receptor                 | 5.36E-06 | 3 | 4.65 | 4.62 | 4.33 | 4.95 | 4.68 | 4.96 | 5.42 | 5.30 |

|           |                |        |                                                                                                             |          |   |       |       |       |       |       |       |       |       |
|-----------|----------------|--------|-------------------------------------------------------------------------------------------------------------|----------|---|-------|-------|-------|-------|-------|-------|-------|-------|
| TC0600270 | AIF1           | 199    | allograft inflammatory factor 1 /// Allograft inflammatory factor 1                                         | 1.61E-09 | 3 | 8.67  | 8.08  | 8.46  | 8.56  | 8.41  | 8.59  | 8.63  | 8.65  |
| TC1300107 | AKAP11         | 11215  | A kinase (PKA) anchor protein 11 /// A kinase anchor protein 11                                             | 3.79E-09 | 3 | 4.32  | 4.00  | 3.77  | 4.00  | 4.00  | 4.09  | 4.31  | 4.33  |
| TC1400988 | ALDH6A1        | 4329   | aldehyde dehydrogenase 6 family, member 6                                                                   | 1.64E-10 | 3 | 3.86  | 3.70  | 3.75  | 3.95  | 3.94  | 4.01  | 4.14  | 4.12  |
| TC0102956 | ALDH9A1        | 223    | aldehyde dehydrogenase 9 family, member 9                                                                   | 3.11E-05 | 3 | 6.06  | 5.82  | 6.13  | 6.28  | 6.16  | 6.36  | 6.44  | 6.37  |
| TC0200345 | ALMS1          | 7840   | Alstrom syndrome 1 /// Alstrom syndrome 1                                                                   | 7.32E-09 | 3 | 3.45  | 3.37  | 3.33  | 3.52  | 3.66  | 3.66  | 3.84  | 3.73  |
| TC1700080 | ALOX12         | 239    | arachidonate 12-lipoxygenase                                                                                | 0.000331 | 3 | 5.27  | 4.85  | 4.73  | 5.01  | 5.10  | 5.12  | 5.03  | 5.03  |
| TC1700937 | ALOX15         | 246    | arachidonate 15-lipoxygenase                                                                                | 4.44E-11 | 3 | 5.44  | 4.01  | 4.14  | 4.66  | 4.44  | 4.76  | 5.01  | 5.15  |
| TC0202231 | ALS2           | 57679  | amyotrophic lateral sclerosis 2 (juvenile) /// amyotrophic lateral sclerosis 2 (juvenile)                   | 6.93E-10 | 3 | 4.25  | 3.70  | 3.82  | 4.01  | 3.84  | 3.96  | 4.17  | 4.16  |
| TC0201018 | ALS2CR13       | 150864 | amyotrophic lateral sclerosis 2 (juvenile) /// amyotrophic lateral sclerosis 2 (juvenile)                   | 9.68E-13 | 3 | 5.26  | 4.38  | 4.19  | 4.46  | 4.49  | 4.77  | 4.98  | 5.16  |
| TC0600638 | AMD1           | 262    | adenosylmethionine decarboxylase 1 /// adenosylmethionine decarboxylase 1                                   | 8.72E-12 | 3 | 7.93  | 6.93  | 6.82  | 7.22  | 7.34  | 7.58  | 7.52  | 7.67  |
| TC0X01153 | AMMECR1        | 9949   | Alport syndrome, mental retardation, renal failure /// Alport syndrome, mental retardation, renal failure   | 0.000829 | 3 | 4.05  | 3.82  | 3.87  | 3.91  | 3.86  | 3.88  | 3.97  | 4.02  |
| TC0201825 | ANAPC1         | 651763 | // anaphase promoting complex subunit 1 /// anaphase promoting complex subunit 1                            | 4.93E-06 | 3 | 3.74  | 3.61  | 3.57  | 3.71  | 3.81  | 3.85  | 3.89  | 3.81  |
| TC0301586 | ANAPC13        | 25847  | anaphase promoting complex subunit 13 /// anaphase promoting complex subunit 13                             | 2.17E-18 | 3 | 6.77  | 6.03  | 6.04  | 6.73  | 6.65  | 6.85  | 6.92  | 7.08  |
| TC1201639 | ANAPC5         | 51433  | anaphase promoting complex subunit 5 /// anaphase promoting complex subunit 5                               | 7.36E-15 | 3 | 4.83  | 4.15  | 4.21  | 4.51  | 4.59  | 4.59  | 4.70  | 4.51  |
| TC0103221 | ANGEL2         | 90806  | angel homolog 2 (Drosophila) /// Proteoglycan 4-like domain containing protein 2                            | 3.96E-06 | 3 | 4.95  | 4.63  | 4.75  | 4.85  | 4.74  | 4.83  | 5.01  | 4.95  |
| TC0800663 | ANGPT2         | 285    | angiopoietin 2 /// Angiopoietin-2 precursor                                                                 | 0.000293 | 3 | 3.40  | 3.12  | 3.23  | 3.29  | 3.26  | 3.28  | 3.32  | 3.34  |
| TC0200933 | ANKAR          | 150709 | ankyrin and armadillo repeat containing protein 1 /// ankyrin and armadillo repeat containing protein 1     | 7.58E-05 | 3 | 2.74  | 2.55  | 2.62  | 2.65  | 2.61  | 2.66  | 2.73  | 2.72  |
| TC0701029 | ANKMY2         | 57037  | ankyrin repeat and MYND domain containing protein 2 /// ankyrin repeat and MYND domain containing protein 2 | 0.000147 | 3 | 4.27  | 4.14  | 4.14  | 4.21  | 4.20  | 4.28  | 4.33  | 4.36  |
| TC0X00532 | ANKRD58        | 347454 | ankyrin repeat domain 58                                                                                    | 1.42E-07 | 3 | 5.77  | 5.25  | 5.55  | 5.84  | 5.82  | 5.95  | 6.07  | 6.04  |
| TC1501068 | ANP32A /// Q6  | 8125   | acidic (leucine-rich) nuclear phosphoprotein 32A /// Q6                                                     | 9.28E-07 | 3 | 10.77 | 10.68 | 10.76 | 10.88 | 10.84 | 10.96 | 10.93 | 10.93 |
| TC1000928 | ANUBL1         | 93550  | AN1, ubiquitin-like, homolog (Xenopus) /// AN1, ubiquitin-like, homolog (Xenopus)                           | 5.73E-07 | 3 | 4.24  | 4.07  | 4.06  | 4.18  | 4.17  | 4.22  | 4.32  | 4.29  |
| TC2200282 | APOBEC3C /// , | 140564 | // apolipoprotein B mRNA editing enzyme, cytosine deaminase 3C /// ,                                        | 7.36E-11 | 3 | 5.20  | 4.78  | 4.80  | 5.05  | 4.90  | 5.04  | 5.30  | 5.35  |
| TC2200242 | APOL1          | 8542   | apolipoprotein L, 1                                                                                         | 8.31E-07 | 3 | 6.32  | 5.68  | 5.52  | 5.81  | 5.55  | 6.01  | 6.33  | 6.43  |
| TC2200235 | APOL6          | 80830  | apolipoprotein L, 6                                                                                         | 0.000283 | 3 | 6.62  | 6.94  | 6.60  | 6.86  | 6.48  | 7.00  | 7.23  | 7.54  |
| TC0400607 | ARFIP1         | 27236  | ADP-ribosylation factor interacting protein 1 /// ADP-ribosylation factor interacting protein 1             | 2.70E-10 | 3 | 7.67  | 7.13  | 6.88  | 6.95  | 6.68  | 7.29  | 7.35  | 7.69  |
| TC0400585 | ARHGAP10       | 79658  | Rho GTPase activating protein 10                                                                            | 2.26E-10 | 3 | 3.79  | 3.58  | 3.65  | 4.05  | 3.94  | 4.20  | 4.35  | 4.29  |
| TC0202410 | ARL4C          | 10123  | ADP-ribosylation factor-like 4C                                                                             | 1.82E-10 | 3 | 5.30  | 4.72  | 4.84  | 5.39  | 5.04  | 5.47  | 5.68  | 5.61  |
| TC0700588 | ARMC10         | 83787  | armadillo repeat containing 10 /// SVH                                                                      | 5.32E-12 | 3 | 4.56  | 4.31  | 4.56  | 4.77  | 4.64  | 4.71  | 4.78  | 4.77  |
| TC1101668 | ARRB1          | 408    | arrestin, beta 1                                                                                            | 9.66E-24 | 3 | 6.56  | 5.10  | 4.95  | 5.59  | 5.39  | 5.73  | 6.00  | 6.13  |
| TC0501092 | ARSB           | 411    | arylsulfatase B                                                                                             | 5.03E-09 | 3 | 4.55  | 4.47  | 4.54  | 4.75  | 4.58  | 4.83  | 4.97  | 4.99  |
| TC0201597 | ASPRV1         | 151516 | aspartic peptidase, retroviral-like 1                                                                       | 4.60E-06 | 3 | 6.12  | 5.54  | 5.27  | 5.49  | 5.62  | 6.11  | 6.21  | 6.23  |
| TC1100474 | ASRGL1         | 80150  | asparaginase like 1                                                                                         | 2.32E-11 | 3 | 4.95  | 4.82  | 4.74  | 5.10  | 5.17  | 5.24  | 5.35  | 5.30  |
| TC0301564 | ASTE1          | 28990  | asteroid homolog 1 (Drosophila)                                                                             | 0.000315 | 3 | 4.30  | 4.15  | 4.24  | 4.30  | 4.31  | 4.35  | 4.32  | 4.38  |
| TC0400202 | ATP10D         | 57205  | ATPase, class V, type 10D                                                                                   | 5.37E-06 | 3 | 4.51  | 4.06  | 4.12  | 4.25  | 4.15  | 4.30  | 4.44  | 4.43  |

|           |           |                                                  |          |   |       |       |       |       |       |       |       |       |
|-----------|-----------|--------------------------------------------------|----------|---|-------|-------|-------|-------|-------|-------|-------|-------|
| TC1700568 | ATP5G1    | 516 ATP synthase, H+ transporting, mitoch        | 6.48E-07 | 3 | 5.39  | 5.21  | 5.16  | 5.35  | 5.51  | 5.41  | 5.49  | 5.39  |
| TC1200797 | ATP6V0A2  | 23545 ATPase, H+ transporting, lysosomal V0      | 3.44E-15 | 3 | 5.40  | 4.82  | 4.80  | 5.28  | 5.01  | 5.39  | 5.61  | 5.65  |
| TC0101100 | ATP8B2    | 57198 ATPase, class I, type 8B, member 2 /// I   | 4.93E-08 | 3 | 4.37  | 4.09  | 4.12  | 4.30  | 4.23  | 4.35  | 4.50  | 4.47  |
| TC1500295 | B2M       | 567 beta-2-microglobulin                         | 1.70E-07 | 3 | 10.81 | 10.69 | 10.78 | 10.81 | 10.76 | 10.93 | 10.91 | 11.04 |
| TC2100138 | BACE2     | 25825 beta-site APP-cleaving enzyme 2            | 4.08E-11 | 3 | 4.60  | 3.76  | 3.84  | 4.35  | 4.06  | 4.43  | 4.67  | 4.78  |
| TC0900853 | BAG1      | 573 BCL2-associated athanogene /// BAG fa        | 4.18E-06 | 3 | 7.70  | 7.12  | 7.00  | 7.16  | 7.19  | 7.28  | 7.58  | 7.47  |
| TC0400427 | BANK1     | 55024 B-cell scaffold protein with ankyrin rep   | 3.37E-06 | 3 | 3.28  | 3.27  | 3.32  | 3.52  | 3.44  | 3.65  | 3.74  | 3.90  |
| TC1101531 | BATF2     | 116071 basic leucine zipper transcription factor | 0.000626 | 3 | 5.65  | 5.66  | 5.54  | 5.60  | 5.47  | 5.75  | 5.79  | 6.00  |
| TC0701317 | BAZ1B     | 9031 bromodomain adjacent to zinc finger d       | 0.000433 | 3 | 5.56  | 5.34  | 5.26  | 5.55  | 5.68  | 5.66  | 5.89  | 5.66  |
| TC1201405 | BBS10     | 79738 Bardet-Biedl syndrome 10 /// Bardet-B      | 8.33E-12 | 3 | 4.27  | 3.95  | 4.35  | 4.62  | 4.41  | 4.58  | 4.66  | 4.74  |
| TC1601118 | BBS2      | 583 Bardet-Biedl syndrome 2                      | 4.41E-05 | 3 | 3.96  | 3.73  | 3.83  | 3.88  | 3.78  | 3.82  | 4.03  | 3.95  |
| TC0300479 | BBX       | 56987 bobby sox homolog (Drosophila) /// HM      | 3.14E-06 | 3 | 6.07  | 6.26  | 5.98  | 6.15  | 5.92  | 6.16  | 6.37  | 6.46  |
| TC0102565 | BCAS2     | 10286 breast carcinoma amplified sequence 2      | 1.37E-09 | 3 | 6.45  | 6.49  | 6.37  | 6.63  | 6.48  | 6.72  | 6.94  | 6.95  |
| TC0201539 | BCL11A    | 53335 B-cell CLL/lymphoma 11A (zinc finger p     | 1.28E-12 | 3 | 4.53  | 4.33  | 4.09  | 4.61  | 4.80  | 4.90  | 4.92  | 4.76  |
| TC0200576 | BCL2L11   | 10018 BCL2-like 11 (apoptosis facilitator) /// E | 1.47E-07 | 3 | 6.35  | 5.87  | 5.69  | 6.12  | 6.04  | 6.23  | 6.24  | 6.25  |
| TC0X00854 | BCOR      | 54880 BCL6 co-repressor /// BCL-6 corepresso     | 5.44E-12 | 3 | 5.47  | 4.84  | 4.72  | 4.98  | 5.08  | 5.24  | 5.44  | 5.44  |
| TC0300012 | BHLHB2    | 8553 basic helix-loop-helix domain containin     | 1.26E-11 | 3 | 7.10  | 6.08  | 5.98  | 6.89  | 6.69  | 7.02  | 6.94  | 6.91  |
| TC2200418 | BID       | 637 BH3 interacting domain death agonist ,       | 4.57E-05 | 3 | 7.27  | 7.10  | 7.18  | 7.38  | 7.34  | 7.42  | 7.39  | 7.52  |
| TC1100793 | BIRC3     | 330 baculoviral IAP repeat-containing 3          | 0.00034  | 3 | 4.64  | 4.71  | 4.44  | 5.05  | 4.68  | 4.78  | 5.19  | 5.10  |
| TC1500833 | BMF       | 90427 Bcl2 modifying factor                      | 1.14E-08 | 3 | 5.10  | 4.83  | 4.78  | 4.89  | 4.93  | 4.94  | 4.98  | 5.06  |
| TC1201573 | BRAP      | 8315 BRCA1 associated protein                    | 7.07E-07 | 3 | 7.02  | 6.84  | 6.83  | 7.00  | 6.86  | 7.04  | 7.10  | 7.13  |
| TC1701398 | BRCA1     | 672 breast cancer 1, early onset                 | 2.42E-06 | 3 | 4.63  | 4.34  | 4.23  | 4.40  | 4.55  | 4.62  | 4.68  | 4.67  |
| TC0X00716 | BRCC3     | 79184 BRCA1/BRCA2-containing complex, sub        | 0.00017  | 3 | 5.56  | 5.30  | 5.61  | 5.59  | 5.61  | 5.74  | 5.96  | 5.77  |
| TC0901422 | BRD3      | 8019 bromodomain containing 3 /// Bromod         | 1.06E-08 | 3 | 5.82  | 5.47  | 5.39  | 5.67  | 5.64  | 5.68  | 5.75  | 5.83  |
| TC2100347 | BRWD1     | 54014 bromodomain and WD repeat domain           | 3.53E-06 | 3 | 5.51  | 5.06  | 5.00  | 5.12  | 5.13  | 5.29  | 5.41  | 5.34  |
| TC0300085 | BTD       | 686 biotinidase                                  | 0.000431 | 3 | 4.47  | 4.38  | 4.35  | 4.40  | 4.50  | 4.55  | 4.58  | 4.59  |
| TC1201444 | BTG1      | 694 B-cell translocation gene 1, anti-prolife    | 1.33E-07 | 3 | 9.28  | 9.04  | 8.87  | 9.20  | 9.26  | 9.39  | 9.31  | 9.47  |
| TC0600158 | BTN3A2    | 11118 butyrophilin, subfamily 3, member A2       | 6.64E-18 | 3 | 6.84  | 5.18  | 5.13  | 5.64  | 5.50  | 6.00  | 6.35  | 6.52  |
| TC1000661 | BUB3      | 9184 BUB3 budding uninhibited by benzimid        | 1.62E-06 | 3 | 6.25  | 6.05  | 6.10  | 6.31  | 6.39  | 6.45  | 6.57  | 6.45  |
| TC1000965 | C10orf128 | --- Novel protein. [Source:Uniprot/SPTREN        | 5.47E-19 | 3 | 5.75  | 4.52  | 4.61  | 5.31  | 5.19  | 5.50  | 5.65  | 5.70  |
| TC1000033 | C10orf18  | 54906 chromosome 10 open reading frame 18        | 3.74E-12 | 3 | 4.56  | 4.31  | 4.36  | 4.48  | 4.48  | 4.60  | 4.85  | 4.80  |
| TC1001208 | C10orf33  | 84795 chromosome 10 open reading frame 33        | 2.39E-09 | 3 | 4.44  | 4.10  | 4.19  | 4.41  | 4.27  | 4.44  | 4.49  | 4.49  |
| TC1101074 | C11orf21  | --- Uncharacterized protein C11orf21. [Sou       | 7.78E-05 | 3 | 7.06  | 6.90  | 6.61  | 6.75  | 6.83  | 6.98  | 7.05  | 7.09  |
| TC1100753 | C11orf54  | 28970 chromosome 11 open reading frame 54        | 0.000583 | 3 | 7.00  | 6.86  | 6.93  | 6.82  | 6.66  | 6.99  | 6.93  | 7.10  |

|           |                          |                                               |          |   |      |      |      |      |      |      |      |      |
|-----------|--------------------------|-----------------------------------------------|----------|---|------|------|------|------|------|------|------|------|
| TC1200693 | C12orf24                 | 29902 chromosome 12 open reading frame 24     | 3.59E-05 | 3 | 3.42 | 2.94 | 3.07 | 3.15 | 3.15 | 3.21 | 3.26 | 3.26 |
| TC1200553 | C12orf26                 | 84190 chromosome 12 open reading frame 26     | 0.000107 | 3 | 5.33 | 5.16 | 5.43 | 5.53 | 5.41 | 5.47 | 5.61 | 5.56 |
| TC1201148 | C12orf41                 | 54934 chromosome 12 open reading frame 41     | 6.17E-11 | 3 | 5.03 | 4.59 | 4.63 | 4.81 | 4.93 | 5.00 | 5.04 | 4.98 |
| TC1400819 | C14orf106                | 55320 chromosome 14 open reading frame 106    | 6.84E-09 | 3 | 6.81 | 6.27 | 6.41 | 6.50 | 6.47 | 6.72 | 6.99 | 6.93 |
| TC1400194 | C14orf28                 | 122525 chromosome 14 open reading frame 28    | 1.64E-05 | 3 | 3.59 | 3.45 | 3.80 | 3.70 | 3.45 | 3.56 | 3.72 | 3.78 |
| TC1400981 | C14orf43                 | 91748 chromosome 14 open reading frame 43     | 2.71E-19 | 3 | 5.44 | 4.84 | 4.94 | 5.40 | 5.32 | 5.42 | 5.54 | 5.63 |
| TC1400711 | C14orf93                 | 60686 chromosome 14 open reading frame 93     | 8.73E-07 | 3 | 4.15 | 3.85 | 3.99 | 3.99 | 3.92 | 4.02 | 4.15 | 4.12 |
| TC1500231 | C15orf23                 | 90417 chromosome 15 open reading frame 23     | 8.55E-06 | 3 | 4.29 | 4.17 | 4.18 | 4.37 | 4.48 | 4.53 | 4.66 | 4.51 |
| TC1500805 | C15orf29                 | 79768 chromosome 15 open reading frame 29     | 2.57E-13 | 3 | 7.37 | 6.46 | 6.29 | 6.74 | 6.86 | 7.42 | 7.35 | 7.28 |
| TC1601133 | C16orf80                 | 29105 chromosome 16 open reading frame 80     | 2.51E-08 | 3 | 4.66 | 4.46 | 4.32 | 4.63 | 4.67 | 4.83 | 4.88 | 4.91 |
| TC1700176 | C17orf39                 | 79018 chromosome 17 open reading frame 39     | 9.27E-09 | 3 | 4.59 | 4.40 | 4.60 | 4.79 | 4.71 | 4.78 | 4.88 | 4.82 |
| TC1700132 | C17orf48                 | 56985 chromosome 17 open reading frame 48     | 0.000875 | 3 | 4.40 | 4.15 | 4.25 | 4.31 | 4.06 | 4.28 | 4.48 | 4.59 |
| TC1900407 | C19orf40                 | 91442 chromosome 19 open reading frame 40     | 1.39E-05 | 3 | 4.04 | 3.89 | 3.82 | 3.87 | 3.85 | 3.97 | 3.93 | 4.18 |
| TC1900168 | C19orf66 /// N           | 55337 chromosome 19 open reading frame 66     | 4.23E-05 | 3 | 5.09 | 4.99 | 4.90 | 4.90 | 4.88 | 5.00 | 5.07 | 5.08 |
| TC0101611 | C1orf124                 | 83932 chromosome 1 open reading frame 124     | 0.000937 | 3 | 5.18 | 4.99 | 4.85 | 4.95 | 4.97 | 5.05 | 5.08 | 5.12 |
| TC0101805 | C1orf174                 | 339448 chromosome 1 open reading frame 174    | 1.51E-05 | 3 | 4.34 | 4.07 | 4.16 | 4.23 | 4.21 | 4.24 | 4.32 | 4.34 |
| TC0102400 | C1orf181                 | 54680 chromosome 1 open reading frame 181     | 4.19E-06 | 3 | 3.34 | 3.30 | 3.20 | 3.39 | 3.58 | 3.64 | 3.74 | 3.66 |
| TC0103282 | C1orf55                  | 163859 chromosome 1 open reading frame 55     | 1.94E-20 | 3 | 7.28 | 6.37 | 5.96 | 6.37 | 6.48 | 7.12 | 7.01 | 7.34 |
| TC0100572 | C1orf83                  | 127428 chromosome 1 open reading frame 83     | 8.73E-07 | 3 | 5.08 | 4.66 | 4.77 | 4.89 | 4.88 | 4.94 | 5.10 | 5.04 |
| TC0103329 | C1orf96                  | 126731 chromosome 1 open reading frame 96     | 3.18E-08 | 3 | 6.04 | 5.90 | 5.93 | 5.93 | 5.95 | 6.21 | 6.26 | 6.35 |
| TC2000754 | C20orf111                | 51526 chromosome 20 open reading frame 111    | 1.51E-06 | 3 | 6.64 | 6.24 | 6.17 | 6.39 | 6.32 | 6.55 | 6.50 | 6.57 |
| TC2000099 | C20orf72                 | 92667 chromosome 20 open reading frame 72     | 2.45E-08 | 3 | 5.10 | 4.55 | 4.84 | 4.90 | 4.91 | 4.98 | 5.19 | 5.18 |
| TC2200017 | C22orf37                 | --- Putative uncharacterized protein C22orf37 | 3.11E-06 | 3 | 6.83 | 6.19 | 6.43 | 6.45 | 6.40 | 6.75 | 6.66 | 6.73 |
| TC0301452 | C3orf17                  | 25871 chromosome 3 open reading frame 17      | 0.000415 | 3 | 4.79 | 4.68 | 4.86 | 4.86 | 4.69 | 4.81 | 4.95 | 4.95 |
| TC0400773 | C4orf15                  | 79441 chromosome 4 open reading frame 15      | 1.00E-08 | 3 | 4.12 | 3.84 | 3.99 | 3.97 | 3.95 | 4.12 | 4.24 | 4.25 |
| TC0400844 | C4orf30                  | 54876 chromosome 4 open reading frame 30      | 1.14E-10 | 3 | 5.13 | 4.80 | 4.72 | 4.77 | 4.96 | 5.08 | 5.27 | 5.23 |
| TC0500196 | C5orf29                  | 202309 chromosome 5 open reading frame 29     | 7.85E-07 | 3 | 7.33 | 7.32 | 7.40 | 7.30 | 7.07 | 7.39 | 7.78 | 7.96 |
| TC0500917 | C5orf33                  | 133686 chromosome 5 open reading frame 33     | 1.94E-12 | 3 | 3.77 | 3.65 | 3.63 | 3.88 | 4.04 | 4.17 | 4.17 | 4.13 |
| TC0500714 | C5orf41                  | 153222 chromosome 5 open reading frame 41     | 2.19E-10 | 3 | 8.45 | 7.91 | 7.66 | 8.02 | 7.93 | 8.25 | 8.29 | 8.42 |
| TC0601197 | C6orf106                 | 64771 chromosome 6 open reading frame 106     | 5.60E-11 | 3 | 6.94 | 6.97 | 6.64 | 6.91 | 6.87 | 7.10 | 7.22 | 7.26 |
| TC0600958 | C6orf114 /// GI85411 /// | chromosome 6 open reading frame 114           | 1.15E-08 | 3 | 4.81 | 4.56 | 4.53 | 4.85 | 4.93 | 5.00 | 5.15 | 5.04 |
| TC0601564 | C6orf204                 | 387119 chromosome 6 open reading frame 204    | 2.00E-09 | 3 | 4.84 | 4.30 | 4.29 | 4.73 | 4.52 | 4.72 | 4.82 | 4.86 |
| TC0600802 | C6orf72                  | 116254 chromosome 6 open reading frame 72     | 6.72E-05 | 3 | 6.19 | 6.28 | 6.25 | 6.23 | 6.23 | 6.45 | 6.51 | 6.51 |
| TC0600823 | C6orf97                  | 80129 chromosome 6 open reading frame 97      | 6.22E-09 | 3 | 4.15 | 3.72 | 3.62 | 3.94 | 3.71 | 3.91 | 4.43 | 4.47 |

|           |                          |                                                |          |   |      |      |      |      |      |      |      |      |
|-----------|--------------------------|------------------------------------------------|----------|---|------|------|------|------|------|------|------|------|
| TC0701393 | C7orf23                  | 79161 chromosome 7 open reading frame 23       | 0.000434 | 3 | 5.69 | 5.48 | 5.49 | 5.48 | 5.48 | 5.63 | 5.64 | 5.73 |
| TC0700197 | C7orf36                  | 57002 chromosome 7 open reading frame 36       | 2.79E-07 | 3 | 3.64 | 3.55 | 3.66 | 3.69 | 3.78 | 3.91 | 4.02 | 3.98 |
| TC0700153 | C7orf41                  | 222166 chromosome 7 open reading frame 41      | 9.43E-08 | 3 | 6.13 | 5.55 | 5.11 | 5.64 | 5.91 | 6.16 | 6.10 | 6.15 |
| TC0701653 | C7orf49                  | 78996 chromosome 7 open reading frame 49       | 1.06E-09 | 3 | 7.29 | 6.84 | 6.56 | 6.83 | 6.76 | 7.01 | 7.07 | 7.23 |
| TC0700537 | C7orf59                  | 389541 chromosome 7 open reading frame 59      | 5.80E-13 | 3 | 8.88 | 7.81 | 7.72 | 8.29 | 8.43 | 8.68 | 8.63 | 8.77 |
| TC0901013 | C9orf71                  | 169693 chromosome 9 open reading frame 71      | 0.00069  | 3 | 5.17 | 4.56 | 4.85 | 4.84 | 4.96 | 5.15 | 5.10 | 5.06 |
| TC0901384 | C9orf78                  | 51759 chromosome 9 open reading frame 78       | 4.13E-06 | 3 | 7.88 | 7.69 | 7.49 | 7.87 | 8.02 | 8.05 | 8.26 | 8.11 |
| TC0900506 | C9orf91                  | 203197 chromosome 9 open reading frame 91      | 2.10E-07 | 3 | 4.99 | 4.77 | 4.73 | 4.74 | 4.73 | 4.83 | 4.89 | 5.01 |
| TC2000883 | CABLES2                  | 81928 Cdk5 and Abl enzyme substrate 2 /// Cl   | 0.0008   | 3 | 5.03 | 5.13 | 4.87 | 4.91 | 4.99 | 5.02 | 5.02 | 5.07 |
| TC1900853 | CACNG6                   | 59285 calcium channel, voltage-dependent, g    | 0.000165 | 3 | 3.60 | 3.44 | 3.50 | 3.60 | 3.66 | 3.67 | 3.71 | 3.83 |
| TC1700566 | CALCOCO2                 | 10241 calcium binding and coiled-coil domain   | 5.57E-08 | 3 | 7.76 | 7.73 | 7.48 | 7.47 | 7.43 | 7.61 | 7.71 | 7.86 |
| TC0201493 | CALM3 /// CAL 808 /// 8C | calmodulin 3 (phosphorylase kinase, de         | 3.07E-05 | 3 | 9.28 | 9.23 | 9.33 | 9.37 | 9.33 | 9.41 | 9.44 | 9.49 |
| TC0300992 | CAMK1                    | 8536 calcium/calmodulin-dependent protein      | 1.09E-09 | 3 | 5.69 | 5.20 | 5.22 | 5.66 | 5.47 | 5.72 | 5.88 | 5.88 |
| TC1000061 | CAMK1D                   | 57118 calcium/calmodulin-dependent protein     | 9.47E-07 | 3 | 7.26 | 6.47 | 6.12 | 6.51 | 6.32 | 6.87 | 6.97 | 7.05 |
| TC1001079 | CAMK2G                   | 818 calcium/calmodulin-dependent protein       | 1.11E-11 | 3 | 6.97 | 6.24 | 6.21 | 6.63 | 6.60 | 6.64 | 6.69 | 6.69 |
| TC0901431 | CAMSAP1                  | 157922 calmodulin regulated spectrin-associat  | 0.00044  | 3 | 4.39 | 4.25 | 4.29 | 4.33 | 4.44 | 4.40 | 4.49 | 4.43 |
| TC0401449 | CASP3                    | 836 caspase 3, apoptosis-related cysteine p    | 6.73E-05 | 3 | 6.84 | 6.99 | 6.72 | 7.05 | 6.87 | 7.05 | 7.13 | 7.18 |
| TC0600562 | CASP8AP2                 | 9994 CASP8 associated protein 2                | 2.61E-05 | 3 | 5.14 | 4.94 | 4.83 | 5.03 | 5.02 | 5.13 | 5.45 | 5.26 |
| TC1100272 | CAT                      | 847 catalase                                   | 3.02E-05 | 3 | 9.17 | 8.49 | 8.83 | 9.07 | 8.81 | 8.84 | 9.14 | 9.25 |
| TC1601343 | CBFA2T3                  | 863 core-binding factor, runt domain, alpha    | 4.81E-09 | 3 | 5.41 | 5.00 | 5.04 | 5.13 | 5.12 | 5.30 | 5.35 | 5.39 |
| TC0700611 | CBLL1                    | 79872 Cas-Br-M (murine) ecotropic retroviral   | 5.32E-07 | 3 | 6.72 | 6.66 | 6.64 | 6.73 | 6.60 | 6.85 | 6.95 | 7.03 |
| TC0900742 | CBWD1 /// Q5J            | 55871 COBW domain containing 1 /// COBW c      | 8.80E-10 | 3 | 5.20 | 4.68 | 4.67 | 4.77 | 4.85 | 4.95 | 5.04 | 5.06 |
| TC0200600 | CBWD2                    | 150472 COBW domain containing 2 /// COBW c     | 1.17E-16 | 3 | 4.62 | 3.77 | 3.85 | 3.99 | 4.06 | 4.23 | 4.42 | 4.35 |
| TC0400714 | CCDC111                  | 201973 coiled-coil domain containing 111       | 1.11E-08 | 3 | 3.93 | 3.48 | 3.41 | 3.53 | 3.54 | 3.63 | 3.85 | 3.85 |
| TC0501041 | CCDC125                  | 202243 coiled-coil domain containing 125 /// C | 2.10E-09 | 3 | 8.55 | 8.09 | 7.79 | 7.84 | 8.09 | 8.31 | 8.36 | 8.34 |
| TC0700428 | CCDC146                  | 57639 coiled-coil domain containing 146        | 1.11E-19 | 3 | 6.07 | 4.74 | 4.55 | 4.74 | 4.53 | 5.40 | 5.85 | 6.05 |
| TC0102909 | CCDC19 /// TA(25790 ///  | coiled-coil domain containing 19 /// tra       | 3.25E-11 | 3 | 6.56 | 5.50 | 5.52 | 6.05 | 6.00 | 6.19 | 6.09 | 6.16 |
| TC0100287 | CCDC21                   | 64793 coiled-coil domain containing 21         | 3.98E-10 | 3 | 4.66 | 4.47 | 4.49 | 4.70 | 4.73 | 4.88 | 4.89 | 4.87 |
| TC1700691 | CCDC45                   | 90799 coiled-coil domain containing 45         | 1.88E-05 | 3 | 4.37 | 4.07 | 3.94 | 4.01 | 4.08 | 4.22 | 4.40 | 4.24 |
| TC1201421 | CCDC59                   | 29080 coiled-coil domain containing 59         | 1.04E-07 | 3 | 7.37 | 7.17 | 7.22 | 7.28 | 7.31 | 7.45 | 7.59 | 7.61 |
| TC0300254 | CCDC72                   | 51372 coiled-coil domain containing 72         | 8.05E-07 | 3 | 8.59 | 8.55 | 8.63 | 8.69 | 8.69 | 8.76 | 8.79 | 8.86 |
| TC1200002 | CCDC77                   | 84318 coiled-coil domain containing 77         | 9.60E-07 | 3 | 4.61 | 4.16 | 4.25 | 4.53 | 4.36 | 4.49 | 4.68 | 4.48 |
| TC1401064 | CCDC88C                  | --- Protein Daple (Dvl-associating protein \   | 1.98E-08 | 3 | 5.02 | 4.86 | 4.62 | 4.79 | 4.94 | 4.97 | 5.01 | 4.89 |
| TC1900553 | CCDC97                   | 90324 coiled-coil domain containing 97         | 0.000361 | 3 | 5.92 | 5.98 | 5.90 | 6.12 | 5.96 | 6.11 | 6.14 | 6.26 |

|            |            |                |                                          |                               |          |      |      |      |      |      |      |      |      |      |
|------------|------------|----------------|------------------------------------------|-------------------------------|----------|------|------|------|------|------|------|------|------|------|
| TC1701254  | CCL3L3     | /// CCL 730422 | // chemokine (C-C motif) ligand 3-like 3 | // 3.04E-07                   | 3        | 6.06 | 6.04 | 5.79 | 6.22 | 6.10 | 6.39 | 6.53 | 6.71 |      |
| TC17r00041 | CCL3L3     | /// CCL 414062 | // chemokine (C-C motif) ligand 3-like 3 | // 1.25E-06                   | 3        | 6.05 | 6.19 | 5.90 | 6.39 | 6.25 | 6.68 | 6.90 | 6.96 |      |
| TC17r00024 | CCL4L2     | /// CCL 388372 | // chemokine (C-C motif) ligand 4-like 2 | // 5.98E-07                   | 3        | 5.88 | 6.01 | 5.52 | 6.73 | 6.30 | 6.90 | 7.40 | 7.43 |      |
| TC1700385  | CCL4L2     | /// CCL 730424 | // chemokine (C-C motif) ligand 4-like 2 | // 3.23E-06                   | 3        | 4.88 | 4.85 | 4.56 | 5.51 | 5.18 | 5.72 | 6.20 | 6.23 |      |
| TC0700226  | CCM2       | 83605          | cerebral cavernous malformation 2        | 0.00026                       | 3        | 6.16 | 5.78 | 5.91 | 6.15 | 6.01 | 6.05 | 5.98 | 6.07 |      |
| TC0400336  | CCNG2      | 901            | cyclin G2                                | /// Cyclin-G2. [Source:Unipro | 1.06E-05 | 3    | 9.07 | 8.64 | 8.80 | 8.83 | 8.71 | 8.96 | 8.93 | 9.08 |
| TC1201152  | CCNT1      | 904            | cyclin T1                                | 0.000367                      | 3        | 6.12 | 5.93 | 5.77 | 5.92 | 5.84 | 5.99 | 6.09 | 6.17 |      |
| TC0300231  | CCR3       | 1232           | chemokine (C-C motif) receptor 3         | 5.32E-21                      | 3        | 5.76 | 3.36 | 3.43 | 4.12 | 3.85 | 4.53 | 4.80 | 5.20 |      |
| TC0102925  | CD244      | 51744          | CD244 molecule, natural killer cell rece | 1.94E-10                      | 3        | 4.73 | 4.41 | 4.48 | 4.83 | 4.67 | 4.92 | 5.09 | 5.10 |      |
| TC1700740  | CD300A     | 11314          | CD300a molecule                          | /// CMRF35-H antige           | 0.000191 | 3    | 7.84 | 7.22 | 7.29 | 7.61 | 7.47 | 7.79 | 7.69 | 7.83 |
| TC1701672  | CD300LB    | 124599         | CD300 molecule-like family member b      | 4.12E-16                      | 3        | 7.13 | 5.45 | 5.28 | 6.10 | 5.97 | 6.47 | 6.54 | 6.77 |      |
| TC0202038  | CD302      | 9936           | CD302 molecule                           | 2.01E-08                      | 3        | 8.39 | 7.95 | 8.02 | 8.18 | 8.13 | 8.28 | 8.40 | 8.41 |      |
| TC1900757  | CD33       | 945            | CD33 molecule                            | 8.89E-05                      | 3        | 5.22 | 5.03 | 5.00 | 5.07 | 5.08 | 5.22 | 5.25 | 5.27 |      |
| TC0400115  | CD38       | 952            | CD38 molecule                            | 1.16E-05                      | 3        | 4.30 | 3.89 | 3.86 | 4.03 | 4.16 | 4.19 | 4.15 | 4.08 |      |
| TC0101477  | CD46       | 4179           | CD46 molecule, complement regulator      | 1.50E-14                      | 3        | 8.95 | 8.24 | 8.09 | 8.39 | 8.38 | 8.66 | 8.67 | 8.81 |      |
| TC0100290  | CD52       | 1043           | CD52 molecule                            | 1.38E-16                      | 3        | 6.13 | 4.89 | 5.04 | 6.82 | 6.17 | 6.64 | 7.24 | 7.17 |      |
| TC0501408  | CD74       | 972            | CD74 molecule, major histocompatibili    | 1.89E-14                      | 3        | 7.83 | 7.16 | 6.49 | 7.52 | 7.10 | 7.48 | 7.92 | 8.24 |      |
| TC0102922  | CD84       | 8832           | CD84 molecule                            | /// SLAM family membe         | 2.92E-07 | 3    | 4.99 | 4.25 | 4.32 | 4.74 | 4.49 | 4.61 | 4.90 | 4.87 |
| TC1200048  | CD9        | 928            | CD9 molecule                             | /// CD9 antigen (p24) (Le     | 2.47E-14 | 3    | 5.91 | 5.16 | 5.43 | 6.05 | 5.85 | 6.13 | 6.39 | 6.35 |
| TC0300491  | CD96       | 10225          | CD96 molecule                            | 6.88E-12                      | 3        | 4.41 | 4.12 | 4.07 | 4.52 | 4.56 | 4.74 | 5.19 | 4.86 |      |
| TC0500457  | CDC42SE2   | 56990          | CDC42 small effector 2                   | 4.71E-06                      | 3        | 8.85 | 8.69 | 8.71 | 8.91 | 8.84 | 8.95 | 8.99 | 9.07 |      |
| TC0400706  | CDKN2AIP   | 55602          | CDKN2A interacting protein               | 8.79E-09                      | 3        | 5.26 | 4.87 | 5.11 | 5.23 | 5.34 | 5.34 | 5.47 | 5.44 |      |
| TC0501286  | CDKN2AIPNL | 91368          | CDKN2A interacting protein N-terminal    | 2.29E-06                      | 3        | 4.81 | 4.60 | 4.52 | 4.71 | 4.71 | 4.77 | 4.95 | 4.85 |      |
| TC2000054  | CDS2       | 8760           | CDP-diacylglycerol synthase (phosphati   | 7.71E-09                      | 3        | 7.19 | 6.57 | 6.71 | 7.11 | 6.94 | 6.91 | 6.97 | 6.96 |      |
| TC2200413  | CECR6      | 27439          | cat eye syndrome chromosome region,      | 0.000736                      | 3        | 5.47 | 5.43 | 5.24 | 5.39 | 5.53 | 5.60 | 5.56 | 5.58 |      |
| TC0103011  | CENPL      | /// SNO        | 91687 centromere protein L               | /// small nucleol             | 1.59E-05 | 3    | 3.62 | 3.56 | 3.49 | 3.46 | 3.69 | 3.67 | 3.71 | 3.61 |
| TC1500935  | CEP152     | 22995          | centrosomal protein 152kDa               | /// Centrc                    | 0.000147 | 3    | 4.14 | 3.86 | 3.80 | 4.04 | 4.22 | 4.14 | 4.39 | 4.17 |
| TC0300640  | CEP63      | 80254          | centrosomal protein 63kDa                | 3.06E-22                      | 3        | 9.01 | 7.52 | 7.61 | 8.27 | 8.21 | 8.48 | 8.62 | 8.70 |      |
| TC1900022  | CFD        | 1675           | complement factor D (adipsin)            | 0.000438                      | 3        | 6.53 | 6.02 | 5.84 | 6.20 | 6.17 | 6.64 | 6.49 | 6.62 |      |
| TC1600434  | CHD9       | 80205          | chromodomain helicase DNA binding p      | 3.19E-05                      | 3        | 4.81 | 4.76 | 4.66 | 4.82 | 4.91 | 5.01 | 5.13 | 4.99 |      |
| TC1500234  | CHST14     | 113189         | carbohydrate (N-acetylgalactosamine 4    | 0.000247                      | 3        | 4.44 | 4.45 | 4.47 | 4.68 | 4.57 | 4.62 | 4.94 | 4.90 |      |
| TC0X00176  | CHST7      | 56548          | carbohydrate (N-acetylglucosamine 6-C    | 4.50E-10                      | 3        | 5.84 | 5.17 | 5.05 | 5.40 | 5.49 | 5.89 | 5.76 | 5.90 |      |
| TC0200490  | CIAO1      | 9391           | cytosolic iron-sulfur protein assembly 1 | 4.59E-05                      | 3        | 5.20 | 4.96 | 4.99 | 5.19 | 5.18 | 5.22 | 5.25 | 5.22 |      |
| TC1600172  | CIITA      | 4261           | class II, major histocompatibility compl | 1.19E-07                      | 3        | 4.84 | 4.54 | 4.49 | 4.66 | 4.54 | 4.64 | 4.70 | 4.79 |      |



|           |                |        |                                          |          |   |       |      |      |       |       |       |       |       |
|-----------|----------------|--------|------------------------------------------|----------|---|-------|------|------|-------|-------|-------|-------|-------|
| TC0202110 | CIR /// CIR_HU | 9541   | CBF1 interacting corepressor /// CBF1-i  | 1.34E-10 | 3 | 9.75  | 9.18 | 9.01 | 9.20  | 9.06  | 9.45  | 9.75  | 9.82  |
| TC0400432 | CISD2          | 493856 | CDGSH iron sulfur domain 2               | 1.27E-14 | 3 | 5.97  | 5.54 | 5.77 | 6.45  | 6.35  | 6.35  | 6.47  | 6.46  |
| TC1901495 | CLC            | 1178   | Charcot-Leyden crystal protein           | 4.08E-11 | 3 | 10.46 | 9.45 | 9.16 | 10.63 | 10.34 | 10.85 | 10.97 | 11.05 |
| TC0102508 | CLCC1          | 23155  | chloride channel CLIC-like 1 /// Mid-1-r | 5.48E-07 | 3 | 4.61  | 4.40 | 4.42 | 4.64  | 4.71  | 4.69  | 4.78  | 4.70  |
| TC1200961 | CLEC2B         | 9976   | C-type lectin domain family 2, member    | 9.57E-09 | 3 | 8.20  | 8.09 | 8.15 | 8.37  | 8.21  | 8.56  | 8.57  | 8.67  |
| TC0201287 | CMPK2          | 129607 | cytidine monophosphate (UMP-CMP) k       | 6.32E-07 | 3 | 4.86  | 4.69 | 4.56 | 4.68  | 4.60  | 5.09  | 5.46  | 5.67  |
| TC0X00081 | CNKS2          | 22866  | connector enhancer of kinase suppress    | 5.03E-07 | 3 | 3.04  | 2.91 | 2.91 | 2.96  | 2.89  | 2.99  | 3.12  | 3.14  |
| TC0300133 | CNOT10         | 25904  | CCR4-NOT transcription complex, subu     | 3.65E-08 | 3 | 4.50  | 4.07 | 4.15 | 4.20  | 4.13  | 4.27  | 4.42  | 4.38  |
| TC0800771 | CNOT7          | 29883  | CCR4-NOT transcription complex, subu     | 3.58E-12 | 3 | 5.72  | 5.45 | 5.54 | 5.73  | 5.76  | 5.87  | 5.97  | 5.98  |
| TC0101988 | CNR2           | 1269   | cannabinoid receptor 2 (macrophage)      | 2.19E-10 | 3 | 4.18  | 3.44 | 3.55 | 3.87  | 3.65  | 3.86  | 4.09  | 4.20  |
| TC1000105 | COMM3          | 23412  | COMM domain containing 3 /// COMM        | 1.52E-05 | 3 | 4.16  | 3.96 | 4.04 | 4.16  | 4.26  | 4.24  | 4.33  | 4.21  |
| TC1101313 | COMM9          | 29099  | COMM domain containing 9                 | 0.000101 | 3 | 5.10  | 4.97 | 5.07 | 5.19  | 5.21  | 5.26  | 5.29  | 5.26  |
| TC0700533 | COPS6          | 10980  | COP9 constitutive photomorphogenic t     | 1.28E-05 | 3 | 6.40  | 6.07 | 6.06 | 6.32  | 6.37  | 6.33  | 6.40  | 6.35  |
| TC0201177 | COPS7B         | 64708  | COP9 constitutive photomorphogenic t     | 5.04E-05 | 3 | 4.60  | 4.26 | 4.32 | 4.37  | 4.40  | 4.43  | 4.54  | 4.45  |
| TC1600475 | COQ9           | 57017  | coenzyme Q9 homolog (S. cerevisiae)      | 1.45E-05 | 3 | 5.62  | 5.45 | 5.49 | 5.50  | 5.53  | 5.63  | 5.61  | 5.64  |
| TC1201539 | CORO1C         | 23603  | coronin, actin binding protein, 1C       | 3.59E-05 | 3 | 8.41  | 7.87 | 7.93 | 8.23  | 8.22  | 8.26  | 8.27  | 8.32  |
| TC0400110 | CPEB2          | 132864 | cytoplasmic polyadenylation element b    | 9.65E-07 | 3 | 6.67  | 6.14 | 5.97 | 6.19  | 6.21  | 6.52  | 6.45  | 6.54  |
| TC0700138 | CREB5          | 9586   | cAMP responsive element binding prot     | 6.23E-05 | 3 | 6.94  | 6.61 | 6.69 | 6.91  | 6.78  | 6.91  | 6.82  | 6.83  |
| TC1201291 | CS             | 1431   | citrate synthase                         | 1.23E-09 | 3 | 5.98  | 5.58 | 5.59 | 5.96  | 6.07  | 6.04  | 6.20  | 6.04  |
| TC0100813 | CSF1           | 1435   | colony stimulating factor 1 (macrophag   | 6.05E-12 | 3 | 4.79  | 4.50 | 4.59 | 4.77  | 4.67  | 4.89  | 4.87  | 4.95  |
| TC0700892 | CSGlcA-T /// C | 54480  | chondroitin sulfate glucuronyltransfera  | 3.07E-05 | 3 | 5.67  | 5.63 | 5.65 | 5.75  | 5.70  | 5.85  | 5.83  | 5.86  |
| TC1600524 | CTCF           | 10664  | CCCTC-binding factor (zinc finger prote  | 2.17E-10 | 3 | 7.94  | 7.31 | 7.46 | 7.80  | 7.69  | 7.81  | 7.96  | 7.96  |
| TC1500292 | CTDSPL2        | 51496  | CTD (carboxy-terminal domain, RNA po     | 1.77E-11 | 3 | 5.68  | 5.17 | 5.08 | 5.33  | 5.29  | 5.53  | 5.71  | 5.72  |
| TC1700035 | CTNS           | 1497   | cystinosis, nephropathic                 | 0.000298 | 3 | 4.40  | 4.26 | 4.30 | 4.44  | 4.47  | 4.45  | 4.48  | 4.45  |
| TC1101728 | CTSC           | 1075   | cathepsin C /// Dipeptidyl-peptidase 1   | 1.21E-10 | 3 | 7.53  | 6.58 | 7.50 | 7.87  | 7.46  | 7.56  | 7.83  | 7.71  |
| TC0102730 | CTSS           | 1520   | cathepsin S                              | 5.83E-14 | 3 | 9.85  | 9.63 | 9.45 | 9.40  | 9.39  | 9.75  | 9.79  | 9.92  |
| TC1101802 | CWF19L2        | 143884 | CWF19-like 2, cell cycle control (S. pom | 1.90E-07 | 3 | 5.69  | 5.76 | 5.55 | 5.34  | 5.23  | 5.53  | 5.86  | 5.86  |
| TC0400315 | CXCL1          | 2919   | chemokine (C-X-C motif) ligand 1 (mela   | 3.85E-05 | 3 | 7.09  | 7.50 | 7.07 | 6.74  | 7.17  | 7.53  | 7.24  | 7.49  |
| TC0400313 | CXCL6          | 6372   | chemokine (C-X-C motif) ligand 6 (gran   | 0.00032  | 3 | 3.65  | 3.70 | 3.59 | 3.48  | 3.69  | 3.82  | 3.71  | 3.72  |
| TC0201960 | CXCR4          | 7852   | chemokine (C-X-C motif) receptor 4       | 2.10E-18 | 3 | 9.30  | 8.29 | 8.12 | 8.62  | 8.72  | 9.03  | 9.00  | 9.18  |
| TC0X00069 | CXorf15        | 55787  | chromosome X open reading frame 15       | 4.84E-12 | 3 | 4.32  | 4.00 | 3.83 | 4.41  | 4.71  | 4.77  | 4.83  | 4.66  |
| TC0X00834 | CXorf21        | 80231  | chromosome X open reading frame 21       | 1.84E-09 | 3 | 6.41  | 5.85 | 5.86 | 6.17  | 5.90  | 6.23  | 6.48  | 6.61  |
| TC1600426 | CYLD           | 1540   | cylindromatosis (turban tumor syndron    | 4.24E-05 | 3 | 7.94  | 7.87 | 7.63 | 7.77  | 7.61  | 7.86  | 7.91  | 7.98  |
| TC0201106 | CYP27A1        | 1593   | cytochrome P450, family 27, subfamily    | 3.41E-11 | 3 | 5.04  | 4.54 | 4.23 | 4.69  | 5.00  | 5.24  | 5.05  | 5.11  |

|           |                                                                   |                                                  |          |      |      |      |      |      |      |      |      |      |
|-----------|-------------------------------------------------------------------|--------------------------------------------------|----------|------|------|------|------|------|------|------|------|------|
| TC0800979 | CYP7B1                                                            | 9420 cytochrome P450, family 7, subfamily E      | 0.000567 | 3    | 3.14 | 2.97 | 3.07 | 3.05 | 2.97 | 3.13 | 3.22 | 3.25 |
| TC0X01058 | CYSLTR1                                                           | 10800 cysteinyl leukotriene receptor 1           | 5.26E-13 | 3    | 6.61 | 5.69 | 5.76 | 5.97 | 5.33 | 6.08 | 6.48 | 6.88 |
| TC1300136 | CYSLTR2                                                           | 57105 cysteinyl leukotriene receptor 2           | 8.72E-15 | 3    | 4.27 | 2.86 | 2.89 | 3.71 | 3.20 | 3.65 | 4.16 | 4.44 |
| TC0700999 | DAGLB /// KDE 221955 // diacylglycerol lipase, beta /// KDEL (Lys | 7.36E-13                                         | 3        | 5.85 | 5.32 | 5.45 | 5.71 | 5.75 | 5.73 | 5.72 | 5.72 | 5.72 |
| TC0500853 | DAP                                                               | 1611 death-associated protein /// Death-ass      | 0.000291 | 3    | 6.04 | 6.03 | 5.74 | 6.04 | 6.12 | 6.26 | 6.14 | 6.22 |
| TC0400424 | DAPP1                                                             | 27071 dual adaptor of phosphotyrosine and 3      | 4.35E-09 | 3    | 8.41 | 7.79 | 7.64 | 8.20 | 8.00 | 8.49 | 8.57 | 8.66 |
| TC0301600 | DBR1                                                              | 51163 debranching enzyme homolog 1 (S. cer       | 2.35E-13 | 3    | 4.59 | 4.34 | 4.43 | 4.83 | 4.81 | 4.97 | 5.18 | 5.03 |
| TC0102483 | DBT                                                               | 1629 dihydrolipoamide branched chain trans       | 5.70E-07 | 3    | 3.56 | 3.40 | 3.45 | 3.61 | 3.48 | 3.55 | 3.73 | 3.69 |
| TC1400866 | DDHD1                                                             | 80821 DDHD domain containing 1 /// Probabl       | 9.60E-09 | 3    | 4.58 | 4.12 | 4.12 | 4.47 | 4.20 | 4.37 | 4.47 | 4.46 |
| TC0800229 | DDHD2                                                             | 23259 DDHD domain containing 2 /// DDHD d        | 1.51E-05 | 3    | 3.51 | 3.49 | 3.47 | 3.46 | 3.62 | 3.59 | 3.67 | 3.64 |
| TC1201323 | DDIT3                                                             | 1649 DNA-damage-inducible transcript 3           | 1.58E-09 | 3    | 6.46 | 6.06 | 5.66 | 5.77 | 5.82 | 6.25 | 6.30 | 6.31 |
| TC0200621 | DDX18                                                             | 8886 DEAD (Asp-Glu-Ala-Asp) box polypeptic       | 1.10E-07 | 3    | 5.21 | 5.00 | 4.77 | 5.08 | 5.14 | 5.25 | 5.54 | 5.39 |
| TC0100839 | DDX20                                                             | 11218 DEAD (Asp-Glu-Ala-Asp) box polypeptic      | 1.06E-07 | 3    | 3.90 | 3.70 | 3.80 | 3.84 | 3.86 | 3.92 | 4.00 | 3.99 |
| TC1401090 | DDX24                                                             | 57062 DEAD (Asp-Glu-Ala-Asp) box polypeptic      | 2.09E-10 | 3    | 5.36 | 5.21 | 4.92 | 5.25 | 5.27 | 5.48 | 5.64 | 5.61 |
| TC2000355 | DDX27                                                             | 55661 DEAD (Asp-Glu-Ala-Asp) box polypeptic      | 0.000242 | 3    | 4.94 | 4.76 | 4.52 | 4.60 | 4.75 | 4.76 | 4.91 | 4.80 |
| TC1601191 | DDX28                                                             | 55794 DEAD (Asp-Glu-Ala-Asp) box polypeptic      | 5.97E-07 | 3    | 4.74 | 4.24 | 4.37 | 4.60 | 4.70 | 4.69 | 4.87 | 4.85 |
| TC1901240 | DDX39                                                             | 10212 DEAD (Asp-Glu-Ala-Asp) box polypeptic      | 5.52E-06 | 3    | 5.07 | 4.77 | 4.72 | 4.82 | 5.00 | 5.04 | 4.95 | 4.85 |
| TC1200146 | DDX47 /// APO 81575 /// apolipoprotein L domain containing 1 /    | 1.14E-08                                         | 3        | 4.10 | 3.77 | 3.78 | 3.89 | 3.98 | 4.02 | 4.10 | 4.10 | 3.95 |
| TC1200792 | DDX55                                                             | 57696 DEAD (Asp-Glu-Ala-Asp) box polypeptic      | 2.08E-06 | 3    | 4.23 | 3.95 | 3.96 | 4.04 | 4.26 | 4.18 | 4.32 | 4.18 |
| TC0900844 | DDX58 /// TOP 23586 /// DEAD (Asp-Glu-Ala-Asp) box polypeptic     | 1.05E-12                                         | 3        | 8.07 | 7.18 | 7.01 | 7.44 | 7.25 | 7.84 | 8.19 | 8.35 | 8.35 |
| TC0401390 | DDX60                                                             | 55601 DEAD (Asp-Glu-Ala-Asp) box polypeptic      | 2.42E-06 | 3    | 4.42 | 4.30 | 4.19 | 4.32 | 4.02 | 4.78 | 5.51 | 5.72 |
| TC1501048 | DENND4A                                                           | 10260 DENN/MADD domain containing 4A             | 2.19E-07 | 3    | 5.05 | 4.86 | 4.80 | 5.21 | 5.13 | 5.21 | 5.46 | 5.34 |
| TC0900084 | DENND4C                                                           | 55667 DENN/MADD domain containing 4C ///         | 2.32E-12 | 3    | 4.60 | 4.37 | 4.29 | 4.74 | 4.72 | 4.87 | 5.05 | 4.93 |
| TC2200213 | DEPDC5                                                            | 9681 DEP domain containing 5 /// DEP doma        | 3.31E-14 | 3    | 5.17 | 4.58 | 4.58 | 4.81 | 4.75 | 4.81 | 5.00 | 4.97 |
| TC2200041 | DGCR8                                                             | 54487 DiGeorge syndrome critical region gene     | 0.00084  | 3    | 4.34 | 4.17 | 4.11 | 4.21 | 4.30 | 4.28 | 4.38 | 4.32 |
| TC0301828 | DGKG                                                              | 1608 diacylglycerol kinase, gamma 90kDa          | 7.48E-12 | 3    | 5.08 | 4.50 | 4.02 | 4.38 | 4.68 | 4.83 | 4.84 | 4.81 |
| TC0400855 | DHX15                                                             | 1665 DEAH (Asp-Glu-Ala-His) box polypeptid       | 0.000603 | 3    | 6.61 | 6.40 | 6.48 | 6.60 | 6.66 | 6.73 | 6.80 | 6.65 |
| TC1201645 | DIABLO                                                            | 56616 diablo homolog (Drosophila)                | 0.000927 | 3    | 4.72 | 4.83 | 4.75 | 4.72 | 4.74 | 4.84 | 4.85 | 4.90 |
| TC1600134 | DNAJA3                                                            | 9093 Dnaj (Hsp40) homolog, subfamily A, m        | 0.000183 | 3    | 4.38 | 4.15 | 4.18 | 4.33 | 4.42 | 4.36 | 4.36 | 4.31 |
| TC2200690 | DNAJB7                                                            | 150353 Dnaj (Hsp40) homolog, subfamily B, m      | 1.07E-05 | 3    | 3.65 | 3.13 | 3.19 | 3.37 | 3.36 | 3.28 | 3.50 | 3.60 |
| TC1901215 | DNASE2                                                            | 1777 deoxyribonuclease II, lysosomal             | 4.99E-06 | 3    | 4.84 | 4.42 | 4.43 | 4.67 | 4.60 | 4.90 | 4.78 | 4.80 |
| TC0701556 | DOCK4                                                             | 9732 dedicator of cytokinesis 4 /// Dedicator    | 0.000119 | 3    | 5.52 | 6.16 | 5.28 | 5.47 | 5.39 | 5.93 | 5.98 | 5.93 |
| TC2000717 | DSN1                                                              | 79980 DSN1, MIND kinetochore complex com         | 3.77E-09 | 3    | 4.13 | 3.79 | 3.84 | 3.88 | 4.00 | 4.11 | 4.21 | 4.16 |
| TC0300554 | DTX3L                                                             | 151636 deltex 3-like (Drosophila) /// Protein de | 2.20E-06 | 3    | 8.00 | 7.97 | 7.86 | 7.96 | 7.78 | 8.13 | 8.27 | 8.43 |

|           |                |                                                    |          |   |       |       |      |      |       |       |       |       |
|-----------|----------------|----------------------------------------------------|----------|---|-------|-------|------|------|-------|-------|-------|-------|
| TC1600534 | DUS2L          | 54920 dihydrouridine synthase 2-like, SMM1 l       | 1.13E-07 | 3 | 5.45  | 5.06  | 5.19 | 5.59 | 5.55  | 5.37  | 5.30  | 5.32  |
| TC1201435 | DUSP6          | 1848 dual specificity phosphatase 6                | 5.56E-15 | 3 | 7.61  | 6.78  | 6.27 | 6.65 | 6.65  | 7.38  | 7.38  | 7.67  |
| TC0301082 | DYNC1L1        | 51143 dynein, cytoplasmic 1, light intermedia      | 1.14E-10 | 3 | 8.48  | 7.74  | 7.96 | 8.14 | 7.97  | 8.21  | 8.23  | 8.38  |
| TC1300613 | EBI2           | 1880 Epstein-Barr virus induced gene 2 (lym        | 3.41E-16 | 3 | 5.82  | 4.47  | 4.26 | 5.12 | 4.98  | 5.42  | 6.05  | 6.03  |
| TC1600255 | EEF2K          | 29904 eukaryotic elongation factor-2 kinase        | 1.81E-10 | 3 | 4.45  | 4.29  | 4.28 | 4.48 | 4.45  | 4.55  | 4.63  | 4.65  |
| TC1701433 | EFTUD2         | 9343 elongation factor Tu GTP binding doma         | 1.82E-05 | 3 | 4.90  | 4.59  | 4.68 | 4.93 | 4.93  | 4.89  | 5.01  | 4.93  |
| TC0103348 | EGLN1          | 54583 egl nine homolog 1 (C. elegans)              | 1.45E-05 | 3 | 9.19  | 8.93  | 9.16 | 9.36 | 9.25  | 9.43  | 9.33  | 9.39  |
| TC1700450 | EIF1           | 731937 // eukaryotic translation initiation factor | 0.000254 | 3 | 10.18 | 10.16 | 9.99 | 9.95 | 10.01 | 10.14 | 10.17 | 10.24 |
| TC0201705 | EIF2AK3        | 9451 eukaryotic translation initiation factor      | 1.13E-05 | 3 | 3.62  | 3.56  | 3.48 | 3.69 | 3.78  | 3.76  | 3.88  | 3.79  |
| TC0300849 | EIF2B5         | 8893 eukaryotic translation initiation factor      | 6.24E-05 | 3 | 4.73  | 4.59  | 4.57 | 4.63 | 4.73  | 4.78  | 4.82  | 4.75  |
| TC1001307 | EIF3A          | 8661 eukaryotic translation initiation factor      | 1.28E-07 | 3 | 6.95  | 6.86  | 6.39 | 6.84 | 6.95  | 7.11  | 7.33  | 7.07  |
| TC2200633 | EIF3D          | 8664 eukaryotic translation initiation factor      | 0.000665 | 3 | 6.86  | 6.62  | 6.66 | 6.89 | 6.81  | 6.82  | 6.95  | 6.90  |
| TC2200600 | EIF4ENIF1      | 56478 eukaryotic translation initiation factor     | 0.000404 | 3 | 5.89  | 5.62  | 5.61 | 5.75 | 5.80  | 5.88  | 5.80  | 5.79  |
| TC0200521 | EIF5B          | 9669 eukaryotic translation initiation factor      | 1.27E-09 | 3 | 4.93  | 4.53  | 4.40 | 4.94 | 5.15  | 5.26  | 5.77  | 5.40  |
| TC1800143 | ELP2           | 55250 elongation protein 2 homolog (S. cerev       | 9.43E-14 | 3 | 3.95  | 3.51  | 3.45 | 3.66 | 3.73  | 3.83  | 3.96  | 3.90  |
| TC1400986 | ENTPD5         | 957 ectonucleoside triphosphate diphospho          | 1.48E-08 | 3 | 4.35  | 4.07  | 4.11 | 4.35 | 4.33  | 4.42  | 4.53  | 4.41  |
| TC0300641 | EPHB1          | 2047 EPH receptor B1 /// Ephrin type-B rece        | 9.08E-15 | 3 | 5.50  | 4.41  | 4.30 | 4.77 | 4.73  | 5.03  | 5.04  | 5.10  |
| TC1300438 | EPST1          | 94240 epithelial stromal interaction 1 (breast)    | 3.29E-08 | 3 | 5.88  | 5.36  | 4.90 | 5.17 | 4.74  | 6.00  | 6.78  | 7.34  |
| TC0501160 | ERAP1          | 51752 endoplasmic reticulum aminopeptidase         | 3.89E-08 | 3 | 6.14  | 5.66  | 5.50 | 5.86 | 5.83  | 5.89  | 6.05  | 6.04  |
| TC0500355 | ERAP2 /// NP_( | 64167 endoplasmic reticulum aminopeptidase         | 0.000132 | 3 | 5.09  | 4.79  | 4.62 | 4.87 | 4.70  | 4.96  | 5.53  | 5.61  |
| TC0500223 | ERBB2IP        | 55914 erbb2 interacting protein /// Protein L      | 0.000128 | 3 | 8.53  | 8.20  | 8.33 | 8.30 | 8.14  | 8.44  | 8.44  | 8.46  |
| TC1800365 | ESCO1          | 114799 establishment of cohesion 1 homolog 1       | 6.67E-09 | 3 | 5.60  | 5.18  | 5.20 | 5.32 | 5.21  | 5.47  | 5.74  | 5.64  |
| TC0601211 | ETV7           | 51513 ets variant gene 7 (TEL2 oncogene) ///       | 1.03E-05 | 3 | 4.14  | 4.10  | 3.85 | 4.00 | 3.92  | 4.30  | 4.47  | 4.70  |
| TC1701212 | EVI2A          | 2123 ecotropic viral integration site 2A           | 8.01E-11 | 3 | 6.38  | 6.21  | 6.20 | 6.57 | 6.54  | 6.92  | 6.83  | 7.00  |
| TC0101856 | EXOSC10        | 5394 exosome component 10                          | 0.000348 | 3 | 5.11  | 4.96  | 4.86 | 5.01 | 5.13  | 5.12  | 5.32  | 5.19  |
| TC0900642 | EXOSC2         | 23404 exosome component 2 /// Exosome co           | 6.76E-05 | 3 | 4.05  | 3.86  | 3.90 | 3.98 | 4.14  | 4.05  | 4.22  | 4.08  |
| TC0400507 | EXOSC9         | 5393 exosome component 9                           | 6.12E-10 | 3 | 4.62  | 4.49  | 4.42 | 4.75 | 4.97  | 5.05  | 5.28  | 5.04  |
| TC0500284 | F2RL1          | 2150 coagulation factor II (thrombin) recepto      | 6.73E-06 | 3 | 6.56  | 5.77  | 5.67 | 6.24 | 6.06  | 6.54  | 6.58  | 6.73  |
| TC0901355 | FAM102A        | 399665 family with sequence similarity 102, me     | 5.03E-12 | 3 | 5.49  | 5.15  | 5.07 | 5.45 | 5.29  | 5.50  | 5.84  | 5.76  |
| TC1701663 | FAM104A        | 84923 family with sequence similarity 104, me      | 7.11E-06 | 3 | 6.09  | 6.10  | 6.05 | 6.11 | 6.11  | 6.19  | 6.24  | 6.34  |
| TC0202257 | FAM119A        | 151194 family with sequence similarity 119, me     | 4.50E-08 | 3 | 4.96  | 4.73  | 4.69 | 4.89 | 5.01  | 5.01  | 5.08  | 5.03  |
| TC0501315 | FAM13B1        | 51306 family with sequence similarity 13, mer      | 0.000828 | 3 | 6.54  | 6.66  | 6.42 | 6.46 | 6.40  | 6.56  | 6.73  | 6.72  |
| TC0500369 | FAM174A        | 345757 family with sequence similarity 174, me     | 9.40E-05 | 3 | 5.80  | 5.61  | 5.42 | 5.48 | 5.49  | 5.79  | 5.66  | 5.91  |
| TC1201345 | FAM19A2        | 338811 family with sequence similarity 19 (che     | 1.30E-09 | 3 | 4.47  | 3.95  | 3.84 | 4.12 | 4.00  | 4.23  | 4.34  | 4.34  |

|           |          |                                                               |          |   |       |      |      |      |      |       |       |       |
|-----------|----------|---------------------------------------------------------------|----------|---|-------|------|------|------|------|-------|-------|-------|
| TC1000245 | FAM21A   | 652446 // family with sequence similarity 21, mer             | 3.57E-07 | 3 | 7.31  | 6.61 | 6.47 | 6.81 | 6.81 | 6.91  | 7.14  | 7.03  |
| TC1000220 | FAM21B   | 652446 Protein FAM21B (Fragment). [Source:U                   | 5.76E-07 | 3 | 7.08  | 6.43 | 6.32 | 6.63 | 6.61 | 6.75  | 7.03  | 6.88  |
| TC1000235 | FAM21D   | --- Protein FAM21D (Fragment). [Source:U                      | 4.48E-05 | 3 | 7.67  | 6.84 | 6.80 | 7.12 | 7.03 | 7.21  | 7.58  | 7.43  |
| TC1000202 | FAM21D   | /// FA 653450 // family with sequence similarity 21, mer      | 5.37E-07 | 3 | 7.28  | 6.70 | 6.53 | 6.81 | 6.83 | 6.93  | 7.15  | 7.01  |
| TC0300916 | FAM43A   | 131583 family with sequence similarity 43, mer                | 1.46E-06 | 3 | 4.14  | 3.76 | 3.80 | 4.06 | 4.05 | 4.12  | 4.08  | 4.23  |
| TC0501502 | FAM44B   | 91272 family with sequence similarity 44, mer                 | 5.66E-11 | 3 | 3.59  | 3.28 | 3.28 | 3.64 | 3.78 | 3.85  | 4.10  | 3.94  |
| TC0601628 | FAM54A   | 113115 family with sequence similarity 54, mer                | 0.000219 | 3 | 2.85  | 2.73 | 2.65 | 2.71 | 2.95 | 2.99  | 2.87  | 2.77  |
| TC0100277 | FAM54B   | 56181 family with sequence similarity 54, mer                 | 0.00032  | 3 | 5.09  | 4.78 | 4.79 | 4.93 | 4.89 | 4.97  | 4.96  | 5.02  |
| TC1200425 | FAM62A   | 23344 family with sequence similarity 62 (C2 c                | 1.50E-15 | 3 | 5.93  | 4.91 | 4.82 | 5.86 | 5.56 | 5.90  | 6.24  | 6.22  |
| TC0100311 | FAM76A   | 654163 // family with sequence similarity 76, mer             | 2.71E-08 | 3 | 4.48  | 4.37 | 4.40 | 4.47 | 4.56 | 4.54  | 4.61  | 4.56  |
| TC0901392 | FAM78A   | 286336 family with sequence similarity 78, mer                | 2.26E-09 | 3 | 4.51  | 4.18 | 4.24 | 4.38 | 4.41 | 4.40  | 4.52  | 4.49  |
| TC0600102 | FAM8A1   | 51439 family with sequence similarity 8, mem                  | 6.52E-06 | 3 | 8.35  | 8.14 | 8.08 | 8.13 | 8.02 | 8.39  | 8.31  | 8.51  |
| TC1601353 | FANCA    | 2175 Fanconi anemia, complementation gro                      | 6.47E-07 | 3 | 4.30  | 4.15 | 4.05 | 4.07 | 4.15 | 4.21  | 4.25  | 4.23  |
| TC0900888 | FANCG    | 2189 Fanconi anemia, complementation gro                      | 6.32E-05 | 3 | 4.59  | 4.44 | 4.42 | 4.45 | 4.62 | 4.59  | 4.58  | 4.52  |
| TC1400200 | FANCM    | 57697 Fanconi anemia, complementation gro                     | 0.000201 | 3 | 2.57  | 2.47 | 2.46 | 2.50 | 2.60 | 2.55  | 2.69  | 2.69  |
| TC1000425 | FAS      | 355 Fas (TNF receptor superfamily, membe                      | 3.68E-07 | 3 | 6.95  | 6.48 | 6.61 | 6.72 | 6.48 | 6.88  | 6.96  | 7.12  |
| TC0901150 | FBP1     | 2203 fructose-1,6-bisphosphatase 1                            | 5.34E-05 | 3 | 4.87  | 4.86 | 4.75 | 5.05 | 4.78 | 4.97  | 5.26  | 5.24  |
| TC0701516 | FBXL13   | 222235 F-box and leucine-rich repeat protein 1                | 4.40E-07 | 3 | 4.62  | 3.86 | 3.81 | 4.38 | 4.32 | 4.46  | 4.47  | 4.37  |
| TC0800833 | FBXO16   | /// ZNI 157574 // F-box protein 16 /// zinc finger protein    | 2.58E-05 | 3 | 4.24  | 4.20 | 4.18 | 4.21 | 4.27 | 4.29  | 4.32  | 4.31  |
| TC0101175 | FCER1A   | 2205 Fc fragment of IgE, high affinity I, recep               | 2.45E-06 | 3 | 4.42  | 4.01 | 4.02 | 4.12 | 4.00 | 4.14  | 4.26  | 4.53  |
| TC0101220 | FCGR2C   | /// FCC 9103 /// 2 Fc fragment of IgG, low affinity IIc, rece | 6.92E-09 | 3 | 6.28  | 5.36 | 5.36 | 5.73 | 5.59 | 5.90  | 5.93  | 6.04  |
| TC0701369 | FGL2     | 10875 fibrinogen-like 2                                       | 1.23E-16 | 3 | 10.90 | 9.78 | 9.14 | 9.61 | 9.62 | 10.45 | 10.63 | 10.86 |
| TC0400226 | FIP1L1   | 81608 FIP1 like 1 (S. cerevisiae) /// Pre-mRNA                | 1.30E-08 | 3 | 6.93  | 6.91 | 6.87 | 6.96 | 6.94 | 7.03  | 7.16  | 7.20  |
| TC1701076 | FLCN     | 201163 folliculin                                             | 1.21E-11 | 3 | 5.33  | 4.97 | 4.87 | 5.00 | 5.10 | 5.27  | 5.13  | 5.18  |
| TC1100997 | FLI1     | 2313 Friend leukemia virus integration 1 ///                  | 0.000731 | 3 | 8.20  | 7.89 | 7.77 | 8.15 | 8.08 | 8.14  | 8.07  | 8.18  |
| TC1100279 | FLJ14213 | /// N 79899 protor-2 /// CDNA FLJ14213 fis, clone N           | 6.70E-11 | 3 | 4.16  | 3.67 | 3.55 | 3.70 | 3.62 | 3.83  | 3.95  | 4.09  |
| TC0800264 | FLJ23356 | 84197 hypothetical protein FLJ23356                           | 0.000558 | 3 | 5.25  | 4.94 | 4.98 | 5.15 | 5.17 | 5.07  | 5.18  | 5.15  |
| TC0301085 | FLJ45032 | /// GI 643853 // similar to F40B5.2b /// galactosidase, b     | 0.000496 | 3 | 5.96  | 5.66 | 5.88 | 6.13 | 5.96 | 5.95  | 5.99  | 5.94  |
| TC0600240 | FLJ45422 | 441140 FLJ45422 protein                                       | 0.000989 | 3 | 6.45  | 6.20 | 6.08 | 6.23 | 6.17 | 6.34  | 6.34  | 6.50  |
| TC1300369 | FLT1     | 2321 fms-related tyrosine kinase 1 (vascular                  | 7.99E-06 | 3 | 3.30  | 3.01 | 2.96 | 3.05 | 3.06 | 3.16  | 3.23  | 3.18  |
| TC0101507 | FLVCR1   | 28982 feline leukemia virus subgroup C cellul                 | 3.04E-12 | 3 | 5.94  | 5.33 | 5.10 | 5.48 | 5.65 | 5.75  | 6.01  | 6.20  |
| TC1201178 | FMNL3    | 91010 formin-like 3 /// Formin-like protein 3 (               | 0.000402 | 3 | 4.46  | 4.49 | 4.43 | 4.49 | 4.50 | 4.57  | 4.66  | 4.63  |
| TC0X00642 | FMR1     | 2332 fragile X mental retardation 1 /// Fragil                | 7.95E-10 | 3 | 7.50  | 7.15 | 6.94 | 7.02 | 6.91 | 7.25  | 7.37  | 7.44  |
| TC1700866 | FN3KRP   | 79672 fructosamine-3-kinase-related protein                   | 0.000691 | 3 | 4.64  | 4.52 | 4.49 | 4.52 | 4.66 | 4.68  | 4.74  | 4.62  |

|            |               |                                                   |          |   |       |       |       |       |       |       |       |       |
|------------|---------------|---------------------------------------------------|----------|---|-------|-------|-------|-------|-------|-------|-------|-------|
| TC1101362  | FNBP4         | 23360 formin binding protein 4                    | 2.17E-11 | 3 | 5.26  | 4.46  | 4.44  | 4.71  | 4.77  | 4.82  | 5.11  | 4.95  |
| TC0102174  | FOXJ3         | 22887 forkhead box J3 /// Forkhead box prote      | 9.57E-06 | 3 | 6.09  | 6.16  | 6.10  | 6.15  | 5.99  | 6.21  | 6.20  | 6.29  |
| TC0102476  | FRRS1         | 391059 ferric-chelate reductase 1 /// stromal c   | 1.50E-11 | 3 | 3.84  | 3.13  | 3.44  | 4.06  | 3.66  | 4.13  | 4.53  | 4.53  |
| TC1900700  | FTL           | 2512 ferritin, light polypeptide /// Ferritin lig | 0.000338 | 3 | 11.89 | 11.70 | 11.72 | 11.94 | 11.87 | 11.99 | 11.93 | 11.99 |
| TC0101987  | FUCA1         | 2517 fucosidase, alpha-L- 1, tissue /// Tissue    | 0.000846 | 3 | 4.66  | 4.44  | 4.58  | 4.78  | 4.63  | 4.74  | 4.92  | 4.87  |
| TC0X00870  | FUNDC1        | 139341 FUN14 domain containing 1                  | 9.02E-09 | 3 | 4.71  | 4.62  | 4.40  | 4.53  | 4.50  | 4.80  | 4.99  | 5.08  |
| TC01r00024 | FUSIP1        | 10772 FUS interacting protein (serine/arginine    | 3.27E-05 | 3 | 5.16  | 4.98  | 5.03  | 5.16  | 5.26  | 5.31  | 5.42  | 5.31  |
| TC1500322  | GALK2         | 2585 galactokinase 2                              | 1.45E-05 | 3 | 4.67  | 4.46  | 4.57  | 4.60  | 4.59  | 4.66  | 4.71  | 4.71  |
| TC0400680  | GALNT7        | 51809 UDP-N-acetyl-alpha-D-galactosamine:p        | 0.000978 | 3 | 6.93  | 6.82  | 6.81  | 7.09  | 6.98  | 7.07  | 7.16  | 7.04  |
| TC0X00213  | GATA1         | 2623 GATA binding protein 1 (globin transcri      | 1.50E-06 | 3 | 5.11  | 4.78  | 4.74  | 4.93  | 4.81  | 4.98  | 5.04  | 5.06  |
| TC0700473  | GATAD1        | 57798 GATA zinc finger domain containing 1        | 0.000679 | 3 | 5.22  | 5.01  | 5.04  | 5.09  | 5.13  | 5.15  | 5.31  | 5.19  |
| TC0102415  | GBP1          | 2633 guanylate binding protein 1, interferon      | 2.80E-09 | 3 | 7.88  | 7.04  | 6.55  | 7.00  | 6.54  | 7.85  | 8.09  | 8.65  |
| TC0102413  | GBP3          | 2635 guanylate binding protein 3 /// Guanyi       | 5.48E-06 | 3 | 5.85  | 5.49  | 5.51  | 5.77  | 5.37  | 6.05  | 6.32  | 6.58  |
| TC0102418  | GBP4          | 115361 guanylate binding protein 4                | 1.14E-12 | 3 | 6.32  | 4.76  | 3.97  | 4.76  | 4.36  | 5.59  | 6.17  | 6.81  |
| TC0102419  | GBP5          | 115362 guanylate binding protein 5                | 8.25E-12 | 3 | 8.81  | 7.28  | 6.65  | 7.17  | 6.76  | 8.16  | 8.51  | 9.09  |
| TC0100709  | GBP6          | 163351 guanylate binding protein family, mem      | 2.23E-06 | 3 | 3.56  | 3.36  | 3.25  | 3.45  | 3.37  | 3.72  | 3.88  | 4.04  |
| TC0102417  | GBP7 /// GBP2 | 388646 // guanylate binding protein 7 /// guanyl  | 1.35E-07 | 3 | 6.43  | 5.81  | 5.94  | 6.15  | 5.85  | 6.20  | 6.33  | 6.49  |
| TC0701610  | GCC1          | 79571 GRIP and coiled-coil domain containing      | 0.000142 | 3 | 6.10  | 6.20  | 6.00  | 6.04  | 5.90  | 6.08  | 6.27  | 6.29  |
| TC0601343  | GCLC          | 2729 glutamate-cysteine ligase, catalytic sub     | 2.60E-08 | 3 | 4.25  | 3.77  | 3.74  | 4.04  | 4.10  | 4.12  | 4.22  | 4.20  |
| TC0300746  | GFM1          | 85476 G elongation factor, mitochondrial 1 //     | 3.65E-05 | 3 | 3.66  | 3.54  | 3.56  | 3.64  | 3.71  | 3.73  | 3.83  | 3.78  |
| TC1600940  | GGA2          | 23062 golgi associated, gamma adaptin ear cc      | 1.05E-08 | 3 | 4.37  | 4.26  | 4.20  | 4.52  | 4.54  | 4.64  | 4.77  | 4.67  |
| TC0301009  | GHRL          | 51738 ghrelin/obestatin preprohormone /// A       | 9.22E-09 | 3 | 6.43  | 5.89  | 6.03  | 6.23  | 6.16  | 6.24  | 6.50  | 6.44  |
| TC0901079  | GKAP1         | 80318 G kinase anchoring protein 1 /// G kina     | 0.000934 | 3 | 5.11  | 4.96  | 4.94  | 5.16  | 5.10  | 5.22  | 5.32  | 5.29  |
| TC0900600  | GLE1          | 2733 GLE1 RNA export mediator homolog (y          | 0.000117 | 3 | 5.50  | 5.21  | 5.22  | 5.35  | 5.27  | 5.33  | 5.42  | 5.36  |
| TC1400470  | GLRX5         | 51218 glutaredoxin 5                              | 1.76E-11 | 3 | 6.94  | 6.43  | 6.55  | 7.22  | 7.37  | 7.37  | 7.48  | 7.30  |
| TC0200941  | GLS           | 2744 glutaminase /// Glutaminase kidney isc       | 2.24E-05 | 3 | 5.03  | 4.55  | 4.85  | 4.98  | 4.86  | 4.93  | 5.13  | 5.03  |
| TC0301260  | GLT8D1        | 55830 glycosyltransferase 8 domain containin      | 2.51E-07 | 3 | 4.85  | 4.52  | 4.73  | 4.89  | 4.80  | 4.85  | 4.95  | 4.90  |
| TC0200319  | GMCL1         | 64395 germ cell-less homolog 1 (Drosophila)       | 7.70E-10 | 3 | 6.79  | 6.33  | 6.52  | 6.76  | 6.68  | 6.92  | 6.98  | 7.04  |
| TC1201714  | GOLGA3        | 2802 golgi autoantigen, golgin subfamily a, 3     | 6.43E-06 | 3 | 4.61  | 4.51  | 4.40  | 4.55  | 4.60  | 4.62  | 4.69  | 4.59  |
| TC0301734  | GOLIM4        | 27333 golgi integral membrane protein 4           | 1.41E-15 | 3 | 4.77  | 4.63  | 4.62  | 5.16  | 5.12  | 5.34  | 5.69  | 5.52  |
| TC0102728  | GOLPH3L       | 55204 golgi phosphoprotein 3-like /// GPP34-      | 3.22E-17 | 3 | 5.72  | 4.60  | 4.58  | 5.06  | 5.37  | 5.54  | 5.68  | 5.45  |
| TC0601562  | GOPC          | 57120 golgi associated PDZ and coiled-coil mo     | 7.67E-09 | 3 | 5.17  | 4.88  | 5.21  | 5.37  | 5.28  | 5.35  | 5.54  | 5.42  |
| TC1900409  | GPATCH1       | 55094 G patch domain containing 1                 | 8.25E-13 | 3 | 4.63  | 4.23  | 4.21  | 4.34  | 4.39  | 4.52  | 4.72  | 4.75  |
| TC0500193  | GPBP1         | 65056 GC-rich promoter binding protein 1 ///      | 1.22E-07 | 3 | 8.80  | 8.69  | 8.54  | 8.61  | 8.55  | 8.75  | 8.81  | 8.89  |

|           |             |                 |                                          |                       |          |   |       |       |       |       |       |       |       |       |
|-----------|-------------|-----------------|------------------------------------------|-----------------------|----------|---|-------|-------|-------|-------|-------|-------|-------|-------|
| TC1201650 | GPR109A     | /// G 338442    | // G protein-coupled receptor 109A       | /// G                 | 9.31E-05 | 3 | 7.30  | 7.34  | 6.44  | 6.82  | 6.74  | 7.33  | 7.20  | 7.38  |
| TC1201651 | GPR109B     | 8843            | G protein-coupled receptor 109B          |                       | 5.04E-05 | 3 | 7.69  | 7.76  | 7.02  | 7.59  | 7.52  | 8.11  | 7.96  | 8.10  |
| TC1600477 | GPR114      | 654091          | // G protein-coupled receptor 114        |                       | 6.27E-07 | 3 | 4.50  | 4.14  | 4.17  | 4.32  | 4.26  | 4.39  | 4.44  | 4.47  |
| TC0102346 | GPR177      | 79971           | G protein-coupled receptor 177           | /// Int               | 2.95E-09 | 3 | 8.18  | 7.04  | 6.56  | 7.64  | 7.85  | 8.08  | 7.91  | 7.83  |
| TC0X00161 | GPR34       | 2857            | G protein-coupled receptor 34            | /// Prob              | 5.98E-13 | 3 | 3.23  | 2.70  | 2.85  | 3.49  | 3.18  | 3.64  | 4.09  | 4.12  |
| TC1101455 | GPR44       | 11251           | G protein-coupled receptor 44            |                       | 3.10E-11 | 3 | 5.20  | 4.24  | 4.47  | 4.91  | 4.78  | 4.98  | 5.22  | 5.27  |
| TC0X00162 | GPR82       | 27197           | G protein-coupled receptor 82            |                       | 4.04E-14 | 3 | 3.51  | 2.90  | 2.97  | 3.22  | 2.94  | 3.31  | 4.00  | 4.22  |
| TC0100940 | GPR89C      | 728932          | G protein-coupled receptor 89C           |                       | 3.00E-08 | 3 | 4.16  | 3.57  | 3.50  | 3.90  | 3.95  | 4.14  | 4.31  | 4.08  |
| TC0102638 | GPR89C      | 728932          | G protein-coupled receptor 89C           |                       | 8.09E-08 | 3 | 3.69  | 3.34  | 3.36  | 3.50  | 3.63  | 3.64  | 3.71  | 3.63  |
| TC0100957 | GPR89C      | /// GP 728932   | // G protein-coupled receptor 89C        | /// G p               | 1.61E-07 | 3 | 3.91  | 3.45  | 3.45  | 3.65  | 3.79  | 3.76  | 3.90  | 3.74  |
| TC1900032 | GPX4        | 2879            | glutathione peroxidase 4 (phospholipid   |                       | 1.45E-09 | 3 | 6.08  | 5.88  | 5.52  | 6.15  | 6.25  | 6.35  | 6.30  | 6.36  |
| TC1100945 | GRAMD1B     | 57476           | GRAM domain containing 1B                |                       | 2.39E-09 | 3 | 4.16  | 4.08  | 3.95  | 4.23  | 4.26  | 4.51  | 4.60  | 4.63  |
| TC0200030 | GRHL1       | 29841           | grainyhead-like 1 (Drosophila)           |                       | 0.000651 | 3 | 3.07  | 3.01  | 3.06  | 3.11  | 3.05  | 3.11  | 3.10  | 3.20  |
| TC1600865 | GSPT1       | 2935            | G1 to S phase transition 1               |                       | 3.76E-06 | 3 | 6.02  | 4.97  | 4.74  | 5.41  | 5.50  | 5.42  | 5.63  | 5.42  |
| TC1100218 | GTF2H1      | 2965            | general transcription factor IIH, polype |                       | 2.18E-06 | 3 | 4.50  | 4.42  | 4.22  | 4.39  | 4.41  | 4.53  | 4.69  | 4.60  |
| TC0700464 | GTPBP10     | 85865           | GTP-binding protein 10 (putative)        | /// G                 | 0.000181 | 3 | 4.86  | 4.79  | 5.01  | 5.00  | 4.94  | 5.13  | 5.26  | 5.21  |
| TC0300501 | GTPBP8      | 29083           | GTP-binding protein 8 (putative)         | /// GT                | 4.46E-06 | 3 | 3.84  | 3.69  | 3.80  | 4.01  | 3.94  | 3.98  | 4.12  | 4.13  |
| TC0301042 | hCG_1644884 | ,728070         | // similar to chromosome 16 open reading |                       | 0.00012  | 3 | 4.14  | 4.01  | 4.03  | 4.07  | 4.13  | 4.22  | 4.33  | 4.25  |
| TC0600262 | HCP5        | /// HLA-F 10866 | /// HLA complex P5                       | /// major histocompat | 5.89E-15 | 3 | 6.39  | 5.45  | 5.51  | 5.72  | 5.54  | 6.15  | 6.15  | 6.40  |
| TC0100360 | HDAC1       | 3065            | histone deacetylase 1                    | /// Histone deac      | 2.48E-06 | 3 | 7.14  | 6.60  | 6.80  | 6.99  | 6.88  | 6.99  | 7.14  | 7.00  |
| TC1701417 | HDAC5       | 10014           | histone deacetylase 5                    | /// Histone deac      | 2.56E-06 | 3 | 6.13  | 5.74  | 5.67  | 5.84  | 5.84  | 5.93  | 5.97  | 6.05  |
| TC0202446 | HDLBP       | 3069            | high density lipoprotein binding protein |                       | 5.02E-09 | 3 | 6.87  | 6.38  | 6.23  | 6.61  | 6.68  | 6.65  | 6.71  | 6.66  |
| TC1701576 | HEATR6      | 63897           | HEAT repeat containing 6                 |                       | 1.94E-11 | 3 | 3.73  | 3.54  | 3.52  | 3.81  | 3.90  | 4.00  | 4.19  | 3.98  |
| TC1201004 | HEBP1       | 50865           | heme binding protein 1                   |                       | 6.35E-08 | 3 | 4.95  | 4.87  | 5.01  | 5.21  | 5.10  | 5.22  | 5.35  | 5.54  |
| TC0400390 | HERC5       | 51191           | hect domain and RLD 5                    |                       | 7.74E-14 | 3 | 6.43  | 5.44  | 4.80  | 5.08  | 4.99  | 6.49  | 7.19  | 7.63  |
| TC0400389 | HERC6       | 55008           | hect domain and RLD 6                    | /// Probable E3       | 1.66E-08 | 3 | 4.42  | 4.14  | 4.04  | 4.15  | 4.16  | 4.48  | 4.83  | 4.77  |
| TC2200436 | HIRA        | 7290            | HIR histone cell cycle regulation defect |                       | 3.30E-08 | 3 | 5.44  | 5.10  | 4.87  | 5.09  | 5.23  | 5.29  | 5.35  | 5.28  |
| TC0601020 | HIST1H1C    | 3006            | histone cluster 1, H1c                   |                       | 1.07E-18 | 3 | 7.91  | 7.54  | 7.39  | 8.39  | 8.47  | 8.98  | 8.72  | 8.87  |
| TC0600147 | HIST1H2AC   | 8334            | histone cluster 1, H2ac                  |                       | 0.000117 | 3 | 10.40 | 10.20 | 10.37 | 10.33 | 10.19 | 10.61 | 10.50 | 10.61 |
| TC0600154 | HIST1H3F    | /// H 8968      | /// ε histone cluster 1, H3f             | /// histone cluste    | 0.000485 | 3 | 3.62  | 3.80  | 3.39  | 3.24  | 3.37  | 3.88  | 3.69  | 3.78  |
| TC0601016 | HIST1H4B    | 8366            | histone cluster 1, H4b                   |                       | 3.94E-06 | 3 | 4.61  | 4.07  | 4.09  | 4.49  | 5.06  | 5.12  | 4.76  | 4.68  |
| TC0102704 | HIST2H2BF   | 440689          | histone cluster 2, H2bf                  |                       | 3.74E-07 | 3 | 8.01  | 6.84  | 6.84  | 7.01  | 7.23  | 7.68  | 7.40  | 7.61  |
| TC0102709 | HIST2H4A    | 8370            | histone cluster 2, H4a                   |                       | 3.55E-14 | 3 | 8.59  | 7.61  | 7.28  | 7.62  | 7.71  | 8.17  | 8.08  | 8.27  |
| TC0600143 | HIST2H4A    | /// H 8370      | /// ε histone cluster 2, H4a             | /// histone cluste    | 8.51E-05 | 3 | 3.63  | 3.51  | 3.52  | 3.60  | 3.77  | 3.91  | 3.58  | 3.71  |

|           |          |        |                                                                 |          |   |       |      |      |      |      |       |       |       |
|-----------|----------|--------|-----------------------------------------------------------------|----------|---|-------|------|------|------|------|-------|-------|-------|
| TC0100998 | HIST2H4B | 554313 | histone cluster 2, H4b                                          | 1.26E-14 | 3 | 7.88  | 6.83 | 6.52 | 6.81 | 6.92 | 7.46  | 7.33  | 7.55  |
| TC0601117 | HLA-C    | 3107   | major histocompatibility complex, class I, C                    | 1.75E-06 | 3 | 10.03 | 9.91 | 9.86 | 9.94 | 9.94 | 10.01 | 10.02 | 10.15 |
| TC0601167 | HLA-DMB  | 3109   | major histocompatibility complex, class II, DM beta             | 1.12E-09 | 3 | 4.35  | 4.01 | 3.91 | 4.02 | 3.89 | 4.06  | 4.24  | 4.45  |
| TC0600300 | HLA-DPB1 | 3115   | major histocompatibility complex, class II, DP beta 1           | 0.000334 | 3 | 4.23  | 4.16 | 4.14 | 4.30 | 4.13 | 4.27  | 4.52  | 4.63  |
| TC0600293 | HLA-DRA  | 3122   | major histocompatibility complex, class II, DR alpha            | 1.88E-10 | 3 | 6.99  | 6.43 | 5.69 | 6.88 | 6.28 | 6.71  | 7.29  | 7.69  |
| TC0600233 | HLA-G    | 3135   | major histocompatibility complex, class I, G                    | 1.68E-07 | 3 | 6.24  | 6.15 | 6.14 | 6.18 | 6.17 | 6.29  | 6.28  | 6.35  |
| TC2100349 | HMG1     | 731028 | high-mobility group nucleosome binding domain 1                 | 3.58E-07 | 3 | 5.06  | 5.00 | 4.92 | 4.94 | 5.19 | 5.25  | 5.24  | 5.11  |
| TC0100293 | HMG2     | 732081 | high-mobility group nucleosomal binding domain 2                | 3.88E-11 | 3 | 6.25  | 5.81 | 5.85 | 6.17 | 6.48 | 6.60  | 6.59  | 6.39  |
| TC0600165 | HMG4     | 10473  | high mobility group nucleosomal binding domain 4                | 2.65E-13 | 3 | 5.03  | 4.79 | 4.88 | 4.93 | 4.87 | 5.25  | 5.29  | 5.35  |
| TC1600135 | HMOX2    | 3163   | heme oxygenase (decycling) 2                                    | 1.76E-08 | 3 | 7.44  | 7.15 | 7.19 | 7.27 | 7.23 | 7.41  | 7.45  | 7.49  |
| TC1400684 | HNRNPC   | 3183   | heterogeneous nuclear ribonucleoprotein C                       | 9.34E-12 | 3 | 9.32  | 9.16 | 9.21 | 9.44 | 9.36 | 9.50  | 9.50  | 9.56  |
| TC0101973 | HNRNPR   | 10236  | heterogeneous nuclear ribonucleoprotein R                       | 1.25E-07 | 3 | 4.89  | 4.82 | 4.66 | 4.88 | 5.04 | 5.15  | 5.39  | 5.28  |
| TC0102729 | HORMAD1  | 84072  | HORMA domain containing 1                                       | 4.58E-05 | 3 | 4.50  | 3.88 | 4.00 | 4.44 | 4.49 | 4.83  | 4.67  | 4.60  |
| TC0101959 | HP1BP3   | 50809  | heterochromatin protein 1, binding partner 3                    | 3.24E-11 | 3 | 7.08  | 6.53 | 6.17 | 6.50 | 6.65 | 6.74  | 6.89  | 6.77  |
| TC2200546 | HPS4     | 89781  | Hermansky-Pudlak syndrome 4                                     | 3.81E-08 | 3 | 4.21  | 4.05 | 3.97 | 4.10 | 4.21 | 4.21  | 4.29  | 4.18  |
| TC1101501 | HRASLS5  | 117245 | HRAS-like suppressor family, member 5                           | 1.72E-08 | 3 | 3.97  | 3.59 | 3.61 | 3.86 | 3.72 | 3.82  | 3.81  | 4.03  |
| TC1201603 | HRK      | 8739   | harakiri, BCL2 interacting protein (containing BCL2L1)          | 3.14E-05 | 3 | 4.83  | 4.52 | 4.46 | 4.66 | 4.65 | 4.91  | 5.12  | 4.98  |
| TC1601298 | HSDL1    | 83693  | hydroxysteroid dehydrogenase like 1                             | 7.60E-05 | 3 | 4.70  | 4.42 | 4.54 | 4.67 | 4.58 | 4.69  | 4.74  | 4.80  |
| TC1900281 | HSH2D    | 84941  | hematopoietic SH2 domain containing protein 2                   | 2.09E-18 | 3 | 7.68  | 7.13 | 6.78 | 7.05 | 7.03 | 7.43  | 7.50  | 7.67  |
| TC0101217 | HSPA6    | 3310   | heat shock 70kDa protein 6 (HSP70B')                            | 1.13E-09 | 3 | 6.52  | 6.05 | 5.82 | 6.05 | 6.05 | 6.30  | 6.37  | 6.43  |
| TC0200288 | HSPC159  | 29094  | galectin-related protein                                        | 3.91E-12 | 3 | 7.03  | 6.69 | 6.28 | 7.12 | 7.43 | 7.40  | 7.39  | 7.15  |
| TC0202201 | HSPD1    | 3329   | heat shock 60kDa protein 1 (chaperonin 60)                      | 2.87E-13 | 3 | 6.09  | 5.87 | 5.77 | 6.19 | 6.46 | 6.59  | 6.65  | 6.44  |
| TC0800234 | HTRA4    | 203100 | HtrA serine peptidase 4                                         | 5.46E-05 | 3 | 3.49  | 3.27 | 3.19 | 3.23 | 3.33 | 3.46  | 3.56  | 3.44  |
| TC0102187 | HYI      | 81888  | hydroxypyruvate isomerase homolog (liver)                       | 0.000333 | 3 | 5.58  | 5.50 | 5.44 | 5.50 | 5.63 | 5.55  | 5.58  | 5.52  |
| TC1501237 | IDH2     | 3418   | isocitrate dehydrogenase 2 (NADP+), mitochondrial               | 1.12E-08 | 3 | 4.95  | 4.77 | 4.74 | 5.01 | 5.17 | 5.12  | 5.14  | 5.08  |
| TC0100679 | IFI44    | 10561  | interferon-induced protein 44                                   | 4.07E-07 | 3 | 5.45  | 5.04 | 4.46 | 4.49 | 4.46 | 5.46  | 6.23  | 6.50  |
| TC0100678 | IFI44L   | 10964  | interferon-induced protein 44-like                              | 5.49E-07 | 3 | 4.31  | 4.22 | 3.74 | 3.79 | 3.73 | 4.76  | 5.54  | 5.90  |
| TC0102037 | IFI6     | 2537   | interferon, alpha-inducible protein 6                           | 9.89E-09 | 3 | 5.34  | 5.23 | 4.99 | 5.11 | 5.07 | 5.77  | 6.07  | 6.39  |
| TC0202052 | IFIH1    | 64135  | interferon induced with helicase C domain protein 1             | 1.56E-13 | 3 | 7.49  | 6.19 | 5.53 | 6.73 | 6.54 | 7.33  | 7.88  | 8.18  |
| TC1000429 | IFIT1    | 3434   | interferon-induced protein with tetratricopeptide repeats 1     | 1.50E-15 | 3 | 6.90  | 5.54 | 4.78 | 5.16 | 5.11 | 6.74  | 7.20  | 7.75  |
| TC1000426 | IFIT2    | 3433   | interferon-induced protein with tetratricopeptide repeats 2     | 6.58E-16 | 3 | 9.09  | 7.62 | 7.15 | 7.70 | 7.66 | 8.86  | 9.10  | 9.47  |
| TC1000427 | IFIT3    | 3437   | interferon-induced protein with tetratricopeptide repeats 3     | 1.42E-13 | 3 | 7.74  | 6.98 | 6.47 | 6.58 | 6.62 | 7.63  | 8.18  | 8.50  |
| TC1000430 | IFIT5    | 24138  | interferon-induced protein with tetratricopeptide repeats 5     | 1.95E-11 | 3 | 5.77  | 5.56 | 5.41 | 5.72 | 5.44 | 6.35  | 6.72  | 6.99  |
| TC1300013 | IFT88    | 8100   | intraflagellar transport 88 homolog (Chlamydomonas reinhardtii) | 0.000781 | 3 | 3.61  | 3.73 | 3.54 | 3.49 | 3.49 | 3.63  | 3.71  | 3.69  |

|           |         |        |                                          |                                        |          |       |       |       |       |       |       |       |       |      |
|-----------|---------|--------|------------------------------------------|----------------------------------------|----------|-------|-------|-------|-------|-------|-------|-------|-------|------|
| TC0301824 | IGF2BP2 | 10644  | insulin-like growth factor 2 mRNA bind   | 0.000808                               | 3        | 4.48  | 4.10  | 3.93  | 4.25  | 4.44  | 4.38  | 4.38  | 4.39  |      |
| TC0100876 | IGSF2   | 9398   | immunoglobulin superfamily, member       | 9.45E-11                               | 3        | 5.11  | 4.70  | 4.60  | 5.23  | 5.24  | 5.47  | 5.71  | 5.68  |      |
| TC0500533 | IK      | 3550   | IK cytokine, down-regulator of HLA II    | 4.83E-07                               | 3        | 9.32  | 9.26  | 9.15  | 9.11  | 9.02  | 9.27  | 9.41  | 9.42  |      |
| TC1201482 | IKIP    | 121457 | IKK interacting protein                  | 2.93E-10                               | 3        | 8.16  | 7.21  | 7.29  | 7.43  | 7.51  | 8.03  | 8.04  | 8.28  |      |
| TC0202289 | IKZF2   | 22807  | IKAROS family zinc finger 2 (Helios) /// | 1.31E-12                               | 3        | 4.16  | 3.60  | 3.55  | 3.93  | 3.78  | 4.05  | 4.36  | 4.47  |      |
| TC1701299 | IKZF3   | 22806  | IKAROS family zinc finger 3 (Aiolos) /// | 8.03E-07                               | 3        | 4.24  | 3.93  | 3.90  | 4.03  | 3.92  | 4.03  | 4.28  | 4.27  |      |
| TC0X00522 | IL13RA1 | 3597   | interleukin 13 receptor, alpha 1 ///     | 1.79E-11                               | 3        | 8.72  | 8.03  | 8.27  | 8.19  | 7.97  | 8.38  | 8.50  | 8.76  |      |
| TC0200537 | IL1RL1  | 9173   | interleukin 1 receptor-like 1            | 5.47E-08                               | 3        | 4.61  | 3.63  | 3.87  | 4.43  | 3.93  | 4.24  | 4.55  | 4.55  |      |
| TC0300961 | IL5RA   | 3568   | interleukin 5 receptor, alpha ///        | 1.60E-20                               | 3        | 5.75  | 3.61  | 4.06  | 5.69  | 5.14  | 5.77  | 6.32  | 6.43  |      |
| TC1900179 | ILF3    | 3609   | interleukin enhancer binding factor 3, c | 6.91E-05                               | 3        | 5.12  | 5.05  | 4.88  | 5.15  | 5.31  | 5.28  | 5.40  | 5.17  |      |
| TC0202425 | ILKAP   | 80895  | integrin-linked kinase-associated serine | 1.62E-08                               | 3        | 5.56  | 5.34  | 5.34  | 5.53  | 5.63  | 5.70  | 5.74  | 5.60  |      |
| TC0301197 | IMPDH2  | 3615   | IMP (inosine monophosphate) dehydr       | 1.95E-07                               | 3        | 5.16  | 4.87  | 4.79  | 4.95  | 5.05  | 5.06  | 5.16  | 5.09  |      |
| TC0100601 | INADL   | 10207  | InaD-like (Drosophila) ///               | 1.68E-10                               | 3        | 3.79  | 3.33  | 3.30  | 3.49  | 3.33  | 3.53  | 3.78  | 3.84  |      |
| TC0800241 | INDO    | 3620   | indoleamine-pyrrole 2,3 dioxygenase      | 5.77E-11                               | 3        | 4.14  | 3.26  | 3.27  | 3.68  | 3.40  | 3.88  | 4.47  | 4.62  |      |
| TC0700643 | ING3    | 54556  | inhibitor of growth family, member 3 /,  | 0.000298                               | 3        | 6.32  | 6.28  | 6.22  | 6.14  | 6.13  | 6.38  | 6.44  | 6.46  |      |
| TC0800437 | INTS8   | 55656  | integrator complex subunit 8             | 0.000322                               | 3        | 5.45  | 5.06  | 5.43  | 5.40  | 5.26  | 5.35  | 5.42  | 5.31  |      |
| TC0800834 | INTS9   | 55756  | integrator complex subunit 9             | 0.000673                               | 3        | 4.19  | 3.99  | 4.03  | 4.09  | 4.03  | 4.06  | 4.08  | 4.20  |      |
| TC0500281 | IQGAP2  | 10788  | IQ motif containing GTPase activating p  | 0.000272                               | 3        | 8.04  | 7.42  | 7.74  | 8.21  | 7.93  | 8.00  | 8.21  | 7.98  |      |
| TC0X00946 | IQSEC2  | 23096  | IQ motif and Sec7 domain 2 ///           | 0.000553                               | 3        | 4.26  | 4.12  | 4.09  | 4.18  | 4.08  | 4.11  | 4.23  | 4.24  |      |
| TC0501272 | IRF1    | 3659   | interferon regulatory factor 1           | 3.29E-06                               | 3        | 8.48  | 7.85  | 7.65  | 8.01  | 7.78  | 8.27  | 8.08  | 8.45  |      |
| TC1200674 | ISCU    | 23479  | iron-sulfur cluster scaffold homolog (E. | 5.63E-05                               | 3        | 5.81  | 5.64  | 5.64  | 5.62  | 5.61  | 5.75  | 5.81  | 5.86  |      |
| TC0100022 | ISG15   | 9636   | ISG15 ubiquitin-like modifier            | 5.25E-08                               | 3        | 6.02  | 5.87  | 5.97  | 5.98  | 5.84  | 6.34  | 6.64  | 6.81  |      |
| TC1500602 | ISG20   | 3669   | interferon stimulated exonuclease gene   | 1.18E-11                               | 3        | 8.44  | 7.88  | 7.40  | 7.67  | 7.64  | 8.27  | 8.43  | 8.65  |      |
| TC0102863 | ISG20L2 | 81875  | interferon stimulated exonuclease gene   | 2.54E-07                               | 3        | 6.05  | 5.87  | 5.89  | 6.13  | 6.05  | 6.19  | 6.27  | 6.31  |      |
| TC0500450 | ISOC1   | 51015  | isochorismatase domain containing 1      | 0.000333                               | 3        | 4.26  | 4.01  | 3.99  | 4.38  | 4.39  | 4.38  | 4.39  | 4.46  |      |
| TC0200908 | ITGA4   | 3676   | integrin, alpha 4 (antigen CD49D, alpha  | 4.32E-23                               | 3        | 6.20  | 4.14  | 4.19  | 5.17  | 4.87  | 5.40  | 6.02  | 6.09  |      |
| TC1201245 | ITGB7   | 3695   | integrin, beta 7 ///                     | 1.33E-05                               | 3        | 4.90  | 4.69  | 4.64  | 4.80  | 4.69  | 4.80  | 4.94  | 4.91  |      |
| TC0X01060 | ITM2A   | 9452   | integral membrane protein 2A             | 2.88E-12                               | 3        | 4.34  | 3.75  | 3.86  | 4.36  | 4.40  | 4.59  | 4.85  | 4.83  |      |
| TC1300132 | ITM2B   | 9445   | integral membrane protein 2B ///         | 2.93E-07                               | 3        | 10.81 | 10.55 | 10.69 | 10.71 | 10.69 | 10.85 | 10.79 | 10.96 |      |
| TC1401081 | ITPK1   | 3705   | inositol 1,3,4-triphosphate 5/6 kinase / | 6.10E-13                               | 3        | 7.51  | 6.52  | 6.52  | 6.94  | 6.89  | 7.32  | 7.25  | 7.50  |      |
| TC0103291 | ITPKB   | 3707   | inositol 1,4,5-trisphosphate 3-kinase B  | 1.60E-06                               | 3        | 5.59  | 5.28  | 5.36  | 5.58  | 5.47  | 5.51  | 5.58  | 5.61  |      |
| TC0500299 | JMY /// | NP_68' | 133746                                   | junction-mediating and regulatory prot | 7.76E-07 | 3     | 3.91  | 3.73  | 3.53  | 3.67  | 3.80  | 3.81  | 4.05  | 3.96 |
| TC0102301 | JUN     | 3725   | jun oncogene                             | 5.61E-07                               | 3        | 4.22  | 4.18  | 3.91  | 3.97  | 4.10  | 4.40  | 4.17  | 4.43  |      |
| TC1601270 | KARS    | 3735   | lysyl-tRNA synthetase ///                | 6.82E-10                               | 3        | 6.07  | 5.92  | 5.71  | 6.28  | 6.22  | 6.52  | 6.82  | 6.77  |      |



|            |           |        |                                            |          |   |      |      |      |      |      |      |      |      |
|------------|-----------|--------|--------------------------------------------|----------|---|------|------|------|------|------|------|------|------|
| TC1600992  | KCTD13    | 253980 | potassium channel tetramerisation dor      | 5.86E-07 | 3 | 5.17 | 4.77 | 4.87 | 5.02 | 5.03 | 5.02 | 5.12 | 4.99 |
| TC0600361  | KIAA0082  | 23070  | KIAA0082 /// KIAA0082 (Fragment). [Sc      | 3.83E-06 | 3 | 5.35 | 5.15 | 4.99 | 5.16 | 5.03 | 5.33 | 5.65 | 5.72 |
| TC0101938  | KIAA0090  | 23065  | KIAA0090 /// Uncharacterized protein I     | 3.17E-07 | 3 | 4.17 | 4.08 | 4.09 | 4.14 | 4.26 | 4.26 | 4.30 | 4.24 |
| TC1701174  | KIAA0100  | 9703   | KIAA0100                                   | 2.98E-07 | 3 | 5.86 | 5.35 | 5.38 | 5.73 | 5.70 | 5.65 | 5.85 | 5.73 |
| TC1200756  | KIAA0152  | 9761   | KIAA0152                                   | 2.24E-13 | 3 | 5.34 | 4.93 | 4.74 | 5.43 | 5.66 | 5.79 | 5.76 | 5.61 |
| TC1600642  | KIAA0182  | 23199  | KIAA0182                                   | 1.01E-15 | 3 | 5.22 | 4.67 | 4.60 | 4.80 | 4.80 | 4.91 | 5.03 | 5.03 |
| TC0102106  | KIAA0319L | 79932  | KIAA0319-like /// polycystic kidney dise   | 3.47E-07 | 3 | 6.84 | 6.24 | 6.50 | 6.63 | 6.54 | 6.62 | 6.70 | 6.65 |
| TC1400195  | KIAA0423  | 23116  | KIAA0423 /// Uncharacterized protein I     | 0.000183 | 3 | 3.26 | 3.15 | 3.17 | 3.23 | 3.18 | 3.19 | 3.31 | 3.31 |
| TC0101286  | KIAA0859  | 51603  | KIAA0859 /// Uncharacterized protein I     | 0.00095  | 3 | 4.66 | 4.54 | 4.52 | 4.69 | 4.65 | 4.66 | 4.71 | 4.68 |
| TC0601428  | KIAA1009  | 22832  | KIAA1009 /// KIAA1009. [Source:Uniprc      | 1.51E-05 | 3 | 4.63 | 4.42 | 4.56 | 4.78 | 4.59 | 4.75 | 5.09 | 4.95 |
| TC1500537  | KIAA1024  | 23251  | KIAA1024                                   | 6.52E-05 | 3 | 4.28 | 4.21 | 4.00 | 4.28 | 4.27 | 4.52 | 4.56 | 4.67 |
| TC1700825  | KIAA1618  | 57714  | KIAA1618                                   | 2.45E-05 | 3 | 7.72 | 7.03 | 6.87 | 7.17 | 6.99 | 7.23 | 7.48 | 7.50 |
| TC1100749  | KIAA1731  | ---    | CDNA FLJ37899 fis, clone CD34C300031       | 2.69E-15 | 3 | 5.31 | 4.31 | 4.19 | 4.35 | 4.42 | 4.71 | 5.03 | 4.90 |
| TC0600645  | KIAA1919  | 91749  | KIAA1919                                   | 4.30E-08 | 3 | 4.31 | 3.95 | 4.03 | 4.21 | 4.22 | 4.36 | 4.42 | 4.37 |
| TC16r00003 | KIF22     | 3835   | kinesin family member 22                   | 1.75E-05 | 3 | 5.26 | 5.15 | 5.12 | 5.17 | 5.35 | 5.31 | 5.27 | 5.23 |
| TC0501275  | KIF3A     | 11127  | kinesin family member 3A /// Kinesin-li    | 0.000612 | 3 | 3.18 | 3.17 | 3.21 | 3.29 | 3.22 | 3.29 | 3.37 | 3.36 |
| TC0400164  | KLF3      | 51274  | Kruppel-like factor 3 (basic)              | 5.06E-09 | 3 | 8.37 | 7.80 | 7.85 | 8.16 | 8.10 | 8.32 | 8.24 | 8.34 |
| TC0300266  | KLHDC8B   | 200942 | kelch domain containing 8B /// Kelch d     | 4.65E-08 | 3 | 5.12 | 4.86 | 4.83 | 4.88 | 4.94 | 5.19 | 5.08 | 5.15 |
| TC0300843  | KLHL24    | 54800  | kelch-like 24 (Drosophila) /// Kelch-like  | 8.20E-05 | 3 | 6.66 | 6.44 | 6.29 | 6.59 | 6.43 | 6.61 | 6.57 | 6.71 |
| TC1700709  | KPNA2     | 3838   | karyopherin alpha 2 (RAG cohort 1, im      | 5.97E-08 | 3 | 5.52 | 4.98 | 4.81 | 5.16 | 5.60 | 5.56 | 5.51 | 5.25 |
| TC17r00043 | KPNA2     | 3838   | karyopherin alpha 2 (RAG cohort 1, im      | 6.36E-07 | 3 | 5.15 | 4.82 | 4.66 | 4.97 | 5.29 | 5.30 | 5.19 | 5.01 |
| TC1700551  | KPNB1     | 3837   | karyopherin (importin) beta 1              | 1.08E-07 | 3 | 8.43 | 8.00 | 8.02 | 7.98 | 7.93 | 8.22 | 8.30 | 8.39 |
| TC1201400  | KRR1      | 11103  | KRR1, small subunit (SSU) processome       | 3.05E-13 | 3 | 6.53 | 5.77 | 6.01 | 6.06 | 6.06 | 6.16 | 6.35 | 6.33 |
| TC0400120  | LAP3      | 51056  | leucine aminopeptidase 3                   | 1.38E-07 | 3 | 5.37 | 5.37 | 5.01 | 5.34 | 5.19 | 5.69 | 6.31 | 6.52 |
| TC0X00986  | LAS1L     | 81887  | LAS1-like (S. cerevisiae) /// LAS1-like pr | 0.000319 | 3 | 4.62 | 4.47 | 4.35 | 4.48 | 4.58 | 4.61 | 4.64 | 4.54 |
| TC0102735  | LASS2     | 29956  | LAG1 homolog, ceramide synthase 2 //       | 0.000126 | 3 | 7.10 | 6.70 | 6.85 | 7.09 | 7.08 | 7.08 | 6.98 | 7.07 |
| TC0301092  | LBA1      | 9881   | lupus brain antigen 1                      | 4.87E-18 | 3 | 9.25 | 7.46 | 6.95 | 7.64 | 7.63 | 8.31 | 8.50 | 8.84 |
| TC1201036  | LDHB      | 3945   | lactate dehydrogenase B                    | 2.18E-06 | 3 | 5.24 | 4.98 | 4.80 | 5.28 | 5.54 | 5.42 | 5.60 | 5.39 |
| TC0700668  | LEP       | 3952   | leptin                                     | 5.34E-06 | 3 | 4.00 | 3.65 | 3.61 | 3.88 | 3.90 | 4.08 | 3.89 | 4.05 |
| TC0800184  | LEPROTL1  | 23484  | leptin receptor overlapping transcript-l   | 7.75E-07 | 3 | 7.12 | 6.93 | 6.92 | 7.07 | 7.01 | 7.24 | 7.27 | 7.45 |
| TC0800230  | LETM2     | 137994 | leucine zipper-EF-hand containing tran     | 8.62E-18 | 3 | 5.65 | 4.29 | 4.26 | 5.00 | 5.30 | 5.51 | 5.34 | 5.56 |
| TC1100493  | LGALS12   | 85329  | lectin, galactoside-binding, soluble, 12   | 3.37E-06 | 3 | 5.16 | 5.13 | 4.90 | 5.27 | 5.34 | 5.36 | 5.40 | 5.34 |
| TC0103179  | LGTN      | 1939   | ligatin /// Ligatin (Hepatocellular carcin | 2.91E-06 | 3 | 5.29 | 5.08 | 5.02 | 5.16 | 5.21 | 5.27 | 5.28 | 5.19 |
| TC0400171  | LIAS      | 11019  | lipoic acid synthetase /// Lipoic acid syr | 1.41E-05 | 3 | 4.00 | 3.70 | 3.78 | 3.82 | 3.81 | 3.88 | 4.05 | 3.98 |

|           |               |        |                                              |          |   |      |      |      |      |      |      |      |      |
|-----------|---------------|--------|----------------------------------------------|----------|---|------|------|------|------|------|------|------|------|
| TC1700367 | LIG3          | 3980   | ligase III, DNA, ATP-dependent               | 9.56E-13 | 3 | 4.59 | 4.20 | 4.01 | 4.34 | 4.66 | 4.63 | 4.68 | 4.52 |
| TC1400365 | LIN52         | 91750  | lin-52 homolog (C. elegans)                  | 1.68E-07 | 3 | 4.38 | 4.01 | 4.08 | 4.27 | 4.29 | 4.37 | 4.49 | 4.35 |
| TC1001143 | LIPA          | 3988   | lipase A, lysosomal acid, cholesterol est    | 5.76E-08 | 3 | 4.72 | 4.57 | 4.52 | 4.60 | 4.58 | 4.77 | 4.92 | 4.89 |
| TC1300203 | LMO7          | 4008   | LIM domain 7 /// LIM domain only prot        | 0.000946 | 3 | 2.85 | 2.78 | 2.79 | 2.78 | 2.77 | 2.77 | 2.85 | 2.87 |
| TC0201568 | LOC130773     | 130773 | similar to ribosomal protein L23a            | 8.26E-07 | 3 | 6.32 | 5.61 | 5.56 | 5.86 | 6.02 | 5.95 | 6.06 | 6.01 |
| TC1701125 | LOC284194 /// | 284194 | galectin-9 like /// galectin-9 like [Sourc   | 4.34E-05 | 3 | 6.58 | 6.23 | 6.23 | 6.49 | 6.31 | 6.50 | 6.73 | 6.77 |
| TC1600913 | LOC400506     | 400506 | similar to TSG118.1                          | 0.000451 | 3 | 4.71 | 4.53 | 4.42 | 4.53 | 4.76 | 4.72 | 4.80 | 4.70 |
| TC0500464 | LOC441108 /// | 441108 | hypothetical gene supported by AK128         | 2.57E-14 | 3 | 6.89 | 5.94 | 5.85 | 6.02 | 5.90 | 6.37 | 6.52 | 6.80 |
| TC0400736 | LOC642236 /// | 642236 | // similar to FRG1 protein (FSHD region ge   | 0.000224 | 3 | 6.96 | 6.92 | 7.11 | 7.08 | 6.98 | 7.17 | 7.30 | 7.26 |
| TC1900464 | LOC644096     | 644096 | hypothetical protein LOC644096               | 2.22E-06 | 3 | 3.07 | 2.91 | 2.87 | 2.99 | 3.12 | 3.20 | 3.49 | 3.37 |
| TC1500909 | LOC645212     | 645212 | hypothetical LOC645212                       | 0.000348 | 3 | 5.15 | 4.89 | 4.96 | 4.94 | 4.97 | 5.05 | 5.15 | 5.12 |
| TC1701450 | LOC652203     | 652203 | hypothetical protein LOC652203               | 0.000106 | 3 | 5.26 | 4.59 | 4.65 | 4.97 | 5.12 | 5.01 | 5.05 | 4.87 |
| TC0102942 | LOC652578 /// | 652578 | // similar to Fc fragment of IgG, low affini | 0.00025  | 3 | 9.33 | 8.86 | 8.87 | 8.98 | 8.93 | 9.20 | 9.14 | 9.25 |
| TC1500569 | LOC652637     | 652637 | similar to junction-mediating and regul      | 7.08E-06 | 3 | 4.96 | 4.81 | 4.86 | 5.03 | 4.90 | 5.16 | 5.32 | 5.15 |
| TC1500471 | LOC652671 /// | 652671 | // similar to promyelocytic leukemia prot    | 2.51E-05 | 3 | 5.50 | 5.69 | 5.47 | 5.58 | 5.49 | 5.74 | 5.89 | 6.05 |
| TC1200536 | LOC652725 /// | 652725 | // similar to neuron navigator 3 /// neuro   | 1.88E-09 | 3 | 2.92 | 2.62 | 2.58 | 2.58 | 2.68 | 2.94 | 2.89 | 2.81 |
| TC0400232 | LOC653882 /// | 653882 | // similar to Mast/stem cell growth factor   | 3.94E-09 | 3 | 3.64 | 3.23 | 3.16 | 3.39 | 3.23 | 3.40 | 3.65 | 3.81 |
| TC0101989 | LOC653884 /// | 727922 | // similar to FUS interacting protein (serin | 4.66E-07 | 3 | 4.82 | 4.69 | 4.76 | 4.89 | 4.98 | 5.02 | 5.13 | 5.03 |
| TC2000472 | LOC653889 /// | 653889 | // similar to U5 snRNP-associated 102 kDa    | 1.97E-05 | 3 | 5.82 | 5.72 | 5.53 | 5.68 | 5.62 | 5.74 | 5.91 | 5.87 |
| TC1700191 | LOC654346     | 654346 | similar to galectin 9 short isoform          | 0.000395 | 3 | 5.81 | 5.61 | 5.59 | 5.87 | 5.74 | 5.78 | 5.94 | 6.06 |
| TC0600841 | LOC729446 /// | 729446 | // hypothetical LOC729446 /// AT rich intr   | 1.20E-10 | 3 | 5.38 | 5.16 | 5.12 | 5.28 | 5.20 | 5.28 | 5.32 | 5.35 |
| TC0800920 | LOC731751 /// | 731751 | // similar to protein kinase, DNA-activate   | 5.29E-11 | 3 | 5.39 | 5.48 | 4.75 | 5.05 | 5.49 | 5.67 | 5.73 | 5.58 |
| TC0800763 | LONRF1        | 91694  | LON peptidase N-terminal domain and          | 3.87E-05 | 3 | 5.03 | 4.99 | 4.77 | 4.80 | 4.84 | 5.14 | 5.12 | 5.17 |
| TC0200051 | LPIN1         | 23175  | lipin 1                                      | 2.35E-09 | 3 | 4.06 | 3.92 | 3.94 | 4.04 | 3.96 | 4.07 | 4.18 | 4.20 |
| TC1200201 | LRMP          | 4033   | lymphoid-restricted membrane protein         | 3.32E-15 | 3 | 9.11 | 7.74 | 8.12 | 8.35 | 8.21 | 8.60 | 8.65 | 8.83 |
| TC0700585 | LRR17         | 10234  | leucine rich repeat containing 17            | 6.56E-06 | 3 | 3.62 | 3.16 | 2.97 | 3.34 | 3.27 | 3.46 | 3.40 | 3.44 |
| TC0300938 | LRR33         | 375387 | leucine rich repeat containing 33            | 3.83E-06 | 3 | 4.88 | 4.74 | 4.78 | 4.95 | 4.94 | 5.03 | 5.06 | 5.08 |
| TC0100711 | LRR8B         | 23507  | leucine rich repeat containing 8 family,     | 8.63E-05 | 3 | 4.44 | 4.00 | 4.12 | 4.31 | 4.28 | 4.45 | 4.43 | 4.46 |
| TC0301871 | LSG1          | 55341  | large subunit GTPase 1 homolog (S. cer       | 6.63E-06 | 3 | 3.92 | 3.80 | 3.70 | 3.89 | 3.98 | 4.04 | 4.17 | 4.03 |
| TC0600269 | LST1          | 7940   | leukocyte specific transcript 1 /// Leuk     | 0.000212 | 3 | 8.99 | 8.71 | 8.76 | 8.90 | 8.86 | 8.93 | 8.93 | 8.97 |
| TC0301701 | LXN           | 56925  | latexin                                      | 7.32E-13 | 3 | 5.68 | 4.87 | 5.21 | 5.28 | 5.33 | 5.72 | 5.90 | 5.85 |
| TC0800594 | LY6E          | 4061   | lymphocyte antigen 6 complex, locus E        | 2.29E-05 | 3 | 5.64 | 5.58 | 5.47 | 5.53 | 5.45 | 5.88 | 6.12 | 6.33 |
| TC0202039 | LY75          | 4065   | lymphocyte antigen 75                        | 1.24E-10 | 3 | 7.42 | 6.48 | 5.82 | 6.45 | 6.35 | 6.95 | 7.18 | 7.09 |
| TC0400789 | LYAR          | 55646  | Ly1 antibody reactive homolog (mouse         | 1.82E-12 | 3 | 4.82 | 4.37 | 4.43 | 4.89 | 4.68 | 4.91 | 5.26 | 5.15 |

|           |               |                                                    |          |   |      |      |      |      |      |      |      |      |
|-----------|---------------|----------------------------------------------------|----------|---|------|------|------|------|------|------|------|------|
| TC0101522 | LYPLAL1       | 127018 lysophospholipase-like 1 /// Lysosphosp     | 3.62E-06 | 3 | 4.63 | 4.32 | 4.64 | 4.75 | 4.61 | 4.81 | 4.87 | 4.80 |
| TC0601454 | LYRM2         | 57226 LYR motif containing 2                       | 0.000526 | 3 | 4.42 | 4.37 | 4.39 | 4.38 | 4.50 | 4.47 | 4.61 | 4.50 |
| TC0500456 | LYRM7         | 90624 Lyrm7 homolog (mouse) /// LYR motif-         | 0.00019  | 3 | 4.80 | 4.76 | 4.75 | 4.86 | 4.76 | 4.81 | 5.02 | 4.96 |
| TC0102740 | LYSMD1        | 388695 LysM, putative peptidoglycan-binding,       | 1.38E-05 | 3 | 4.99 | 4.45 | 4.60 | 4.81 | 4.79 | 4.90 | 4.84 | 4.86 |
| TC1500959 | LYSMD2        | 256586 LysM, putative peptidoglycan-binding,       | 1.12E-15 | 3 | 5.77 | 4.91 | 5.04 | 5.49 | 5.38 | 5.94 | 6.16 | 6.37 |
| TC0301149 | LZTFL1        | 54585 leucine zipper transcription factor-like     | 1.02E-13 | 3 | 3.59 | 3.06 | 3.05 | 3.21 | 3.12 | 3.33 | 3.52 | 3.54 |
| TC1101759 | MAML2         | 84441 mastermind-like 2 (Drosophila)               | 1.50E-23 | 3 | 6.74 | 5.32 | 4.47 | 5.12 | 5.18 | 6.01 | 6.25 | 6.51 |
| TC0500386 | MAN2A1        | 4124 mannosidase, alpha, class 2A, member          | 1.67E-11 | 3 | 5.51 | 4.73 | 4.75 | 5.32 | 5.35 | 5.36 | 5.38 | 5.31 |
| TC0401157 | MANBA         | 4126 mannosidase, beta A, lysosomal                | 1.74E-09 | 3 | 7.78 | 6.91 | 7.30 | 7.52 | 7.36 | 7.49 | 7.54 | 7.53 |
| TC0601631 | MAP3K5        | 4217 mitogen-activated protein kinase kinas        | 0.000186 | 3 | 7.59 | 7.30 | 7.69 | 7.60 | 7.33 | 7.50 | 7.54 | 7.58 |
| TC1400845 | MAP4K5        | 11183 mitogen-activated protein kinase kinas       | 2.78E-14 | 3 | 4.61 | 4.09 | 4.12 | 4.82 | 4.70 | 4.87 | 5.21 | 5.14 |
| TC0300289 | MAPKAPK3      | 7867 mitogen-activated protein kinase-activ        | 1.07E-07 | 3 | 7.08 | 6.76 | 6.50 | 6.68 | 6.73 | 6.90 | 6.95 | 7.02 |
| TC0401374 | MAR1          | 55016 membrane-associated ring finger (C3H)        | 9.41E-05 | 3 | 4.29 | 4.31 | 4.33 | 4.40 | 4.33 | 4.33 | 4.48 | 4.46 |
| TC1000132 | MASTL         | 84930 microtubule associated serine/threonin       | 3.69E-08 | 3 | 4.67 | 4.52 | 4.46 | 4.77 | 4.92 | 4.93 | 5.01 | 4.87 |
| TC0500674 | MAT2B         | 27430 methionine adenosyltransferase II, bet       | 2.33E-05 | 3 | 6.40 | 6.48 | 6.47 | 6.46 | 6.36 | 6.66 | 6.62 | 6.79 |
| TC1400921 | MAX           | 4149 MYC associated factor X                       | 0.000171 | 3 | 7.34 | 7.31 | 7.23 | 7.27 | 7.29 | 7.48 | 7.46 | 7.49 |
| TC1300240 | MBNL2         | 10150 muscleblind-like 2 (Drosophila) /// Mus      | 3.22E-09 | 3 | 4.41 | 4.40 | 4.32 | 4.63 | 4.47 | 4.70 | 4.83 | 4.90 |
| TC1800554 | MBP           | 4155 myelin basic protein /// Myelin basic p       | 0.000152 | 3 | 6.63 | 6.24 | 6.18 | 6.46 | 6.33 | 6.51 | 6.45 | 6.55 |
| TC0301798 | MCCC1         | 56922 methylcrotonoyl-Coenzyme A carboxyl          | 3.48E-11 | 3 | 4.08 | 3.62 | 3.61 | 3.91 | 4.00 | 4.03 | 4.25 | 4.15 |
| TC2200233 | MCM5          | 4174 minichromosome maintenance comple             | 0.000181 | 3 | 5.03 | 4.83 | 4.79 | 4.96 | 5.14 | 5.19 | 5.14 | 5.06 |
| TC0701469 | MCM7          | 4176 minichromosome maintenance comple             | 3.81E-11 | 3 | 5.32 | 4.65 | 4.52 | 4.82 | 5.12 | 5.14 | 5.11 | 4.88 |
| TC1701293 | MED1          | 5469 mediator complex subunit 1                    | 3.98E-05 | 3 | 5.42 | 5.27 | 5.38 | 5.54 | 5.43 | 5.55 | 5.70 | 5.61 |
| TC1101417 | MED19         | 219541 mediator complex subunit 19                 | 0.000719 | 3 | 4.76 | 4.75 | 4.69 | 4.89 | 4.86 | 4.88 | 4.96 | 4.95 |
| TC1700964 | MED31         | 51003 mediator complex subunit 31                  | 0.000557 | 3 | 6.77 | 6.38 | 6.75 | 6.81 | 6.68 | 6.91 | 6.91 | 6.96 |
| TC0400417 | METAP1        | 23173 methionyl aminopeptidase 1                   | 2.79E-15 | 3 | 4.70 | 4.15 | 4.11 | 4.62 | 4.70 | 4.72 | 4.83 | 4.67 |
| TC1001332 | METTL10 /// N | 399818 // methyltransferase like 10 /// family wit | 1.26E-06 | 3 | 4.60 | 4.43 | 4.49 | 4.62 | 4.65 | 4.70 | 4.71 | 4.65 |
| TC1800299 | METTL4        | 64863 methyltransferase like 4                     | 7.92E-11 | 3 | 5.86 | 5.35 | 5.22 | 5.38 | 5.40 | 5.83 | 5.94 | 5.98 |
| TC1200336 | METTL7A       | 25840 methyltransferase like 7A                    | 1.83E-14 | 3 | 4.26 | 4.11 | 4.12 | 4.63 | 4.61 | 4.66 | 4.97 | 4.91 |
| TC2200649 | MFNG          | 4242 MFNG O-fucosylpeptide 3-beta-N-acety          | 2.72E-05 | 3 | 5.46 | 5.34 | 5.28 | 5.35 | 5.41 | 5.46 | 5.48 | 5.55 |
| TC1200366 | MFSD5         | 84975 major facilitator superfamily domain cc      | 5.05E-07 | 3 | 5.59 | 5.43 | 5.65 | 5.76 | 5.60 | 5.76 | 5.78 | 5.83 |
| TC1500258 | MGA           | --- CDNA: FLJ22098 fis, clone HEP17040. (f         | 3.08E-09 | 3 | 4.94 | 4.61 | 4.50 | 4.86 | 4.92 | 5.06 | 5.32 | 5.06 |
| TC0200733 | MGAT5         | 4249 mannosyl (alpha-1,6-)-glycoprotein bet        | 1.49E-08 | 3 | 5.39 | 4.94 | 4.91 | 5.24 | 5.33 | 5.42 | 5.42 | 5.33 |
| TC0101536 | MIA3          | 375056 melanoma inhibitory activity family, m      | 2.31E-09 | 3 | 6.45 | 6.09 | 5.98 | 6.23 | 6.06 | 6.37 | 6.64 | 6.65 |
| TC0600263 | MICB /// A2AC | 4277 MHC class I polypeptide-related sequer        | 0.000604 | 3 | 5.15 | 5.01 | 5.02 | 5.20 | 5.15 | 5.28 | 5.29 | 5.34 |

|           |           |               |                                            |          |   |       |       |       |       |       |       |       |       |
|-----------|-----------|---------------|--------------------------------------------|----------|---|-------|-------|-------|-------|-------|-------|-------|-------|
| TC0X00149 | MID1IP1   | 58526         | MID1 interacting protein 1 (gastrulation)  | 2.08E-05 | 3 | 5.05  | 4.61  | 4.69  | 4.91  | 4.95  | 5.06  | 4.94  | 5.05  |
| TC0201776 | MITD1     | 129531        | MIT, microtubule interacting and trans     | 3.50E-05 | 3 | 5.32  | 4.98  | 5.18  | 5.34  | 5.20  | 5.40  | 5.65  | 5.53  |
| TC1100892 | MLL       | 4297          | myeloid/lymphoid or mixed-lineage leu      | 7.43E-07 | 3 | 5.63  | 5.35  | 5.05  | 5.43  | 5.46  | 5.61  | 5.99  | 5.77  |
| TC0300731 | MME       | 4311          | membrane metallo-endopeptidase ///         | 5.67E-16 | 3 | 9.64  | 8.94  | 7.48  | 8.78  | 9.08  | 9.53  | 9.38  | 9.55  |
| TC0101170 | MNDA      | 4332          | myeloid cell nuclear differentiation ant   | 0.000508 | 3 | 11.17 | 11.07 | 11.13 | 11.12 | 11.11 | 11.20 | 11.19 | 11.24 |
| TC2200589 | MORC2     | 22880         | MORC family CW-type zinc finger 2          | 1.91E-05 | 3 | 4.02  | 3.97  | 3.87  | 4.04  | 4.07  | 4.02  | 4.13  | 4.07  |
| TC2100110 | MORC3     | 23515         | MORC family CW-type zinc finger 3 ///      | 0.000208 | 3 | 7.50  | 7.23  | 7.20  | 7.23  | 7.10  | 7.30  | 7.42  | 7.46  |
| TC0X01121 | MORF4L2   | 9643          | mortality factor 4 like 2 /// Mortality fa | 6.01E-06 | 3 | 5.26  | 5.47  | 5.18  | 5.05  | 5.11  | 5.41  | 5.30  | 5.48  |
| TC0100848 | MOV10     | 4343          | Mov10, Moloney leukemia virus 10, ho       | 0.000222 | 3 | 4.94  | 4.61  | 4.57  | 4.77  | 4.69  | 4.81  | 4.96  | 5.00  |
| TC0400805 | MRFAP1L1  | 114932        | Morf4 family associated protein 1-like :   | 2.77E-09 | 3 | 5.86  | 5.46  | 5.76  | 5.67  | 5.54  | 5.83  | 5.94  | 6.05  |
| TC0102118 | MRPS15    | 64960         | mitochondrial ribosomal protein S15        | 0.000104 | 3 | 4.86  | 4.63  | 4.43  | 4.68  | 4.96  | 4.75  | 4.79  | 4.59  |
| TC2100092 | MRPS6 /// | SLC164968 /// | mitochondrial ribosomal protein S6 ///     | 8.47E-12 | 3 | 4.65  | 4.24  | 4.17  | 4.38  | 4.58  | 4.65  | 4.73  | 4.76  |
| TC0200547 | MRPS9     | 64965         | mitochondrial ribosomal protein S9         | 0.000657 | 3 | 3.78  | 3.69  | 3.69  | 3.76  | 3.85  | 3.87  | 3.88  | 3.86  |
| TC1700621 | MSI2      | 124540        | musashi homolog 2 (Drosophila)             | 4.07E-06 | 3 | 4.69  | 4.71  | 4.54  | 4.78  | 4.61  | 4.74  | 4.87  | 4.97  |
| TC0301591 | MSL2L1    | 55167         | male-specific lethal 2-like 1 (Drosophila) | 0.000445 | 3 | 7.61  | 7.44  | 7.62  | 7.72  | 7.64  | 7.80  | 7.70  | 7.80  |
| TC1600458 | MT1CP     | 441771        | metallothionein 1C (pseudogene)            | 0.000446 | 3 | 3.71  | 3.55  | 3.45  | 3.40  | 3.38  | 3.60  | 3.70  | 3.73  |
| TC0103382 | MT1P2     | 645745        | metallothionein 1 pseudogene 2             | 0.000254 | 3 | 5.76  | 5.65  | 5.41  | 5.67  | 5.59  | 5.80  | 5.99  | 5.98  |
| TC1600452 | MT2A      | 4502          | metallothionein 2A                         | 4.07E-15 | 3 | 7.39  | 6.94  | 6.69  | 7.48  | 7.39  | 8.00  | 8.33  | 8.59  |
| TC1600450 | MT4       | 84560         | metallothionein 4                          | 0.000102 | 3 | 4.10  | 3.92  | 3.69  | 3.91  | 4.03  | 4.03  | 4.22  | 4.26  |
| TC0701406 | MTERF     | 7978          | mitochondrial transcription terminati      | 0.000505 | 3 | 4.32  | 4.12  | 4.34  | 4.18  | 4.01  | 4.24  | 4.40  | 4.43  |
| TC1501034 | MTFMT     | 123263        | mitochondrial methionyl-tRNA formyltr      | 8.05E-08 | 3 | 6.51  | 5.84  | 6.15  | 6.28  | 6.25  | 6.48  | 6.46  | 6.48  |
| TC0X00658 | MTM1      | 4534          | myotubularin 1 /// Myotubularin (EC 3      | 7.57E-05 | 3 | 5.91  | 5.97  | 6.02  | 6.06  | 5.96  | 6.09  | 6.20  | 6.23  |
| TC0500898 | MTMR12    | 54545         | myotubularin related protein 12 ///        | 0.000378 | 3 | 5.42  | 4.98  | 5.23  | 5.51  | 5.29  | 5.39  | 5.41  | 5.51  |
| TC0101644 | MTR ///   | Q96B8         | 5-methyltetrahydrofolate-homocystein       | 3.11E-08 | 3 | 3.82  | 3.74  | 3.67  | 3.89  | 4.03  | 4.07  | 4.16  | 4.05  |
| TC0501098 | MTX3      | 345778        | metaxin 3                                  | 0.000253 | 3 | 3.37  | 3.25  | 3.28  | 3.39  | 3.42  | 3.39  | 3.58  | 3.50  |
| TC2100142 | MX1       | 4599          | myxovirus (influenza virus) resistance 1   | 1.34E-10 | 3 | 6.97  | 6.37  | 5.89  | 6.05  | 5.97  | 6.81  | 7.32  | 7.58  |
| TC0600829 | MYCT1     | 80177         | myc target 1                               | 1.48E-06 | 3 | 2.52  | 2.47  | 2.52  | 2.70  | 2.69  | 2.80  | 3.08  | 3.08  |
| TC0600095 | MYLIP     | 29116         | myosin regulatory light chain interactin   | 6.25E-07 | 3 | 7.99  | 7.60  | 7.63  | 8.07  | 7.92  | 8.26  | 8.29  | 8.28  |
| TC0200940 | NAB1      | 4664          | NGFI-A binding protein 1 (EGR1 binding     | 2.37E-10 | 3 | 6.89  | 6.18  | 6.28  | 6.77  | 6.61  | 6.86  | 6.93  | 7.00  |
| TC0200334 | NAGK      | 55577         | N-acetylglucosamine kinase                 | 0.000996 | 3 | 8.27  | 7.71  | 7.94  | 8.10  | 8.06  | 8.32  | 8.26  | 8.23  |
| TC1101080 | NAP1L4    | 4676          | nucleosome assembly protein 1-like 4       | 8.54E-06 | 3 | 5.47  | 5.00  | 5.08  | 5.29  | 5.31  | 5.26  | 5.37  | 5.20  |
| TC1901642 | NAPA      | 8775          | N-ethylmaleimide-sensitive factor attac    | 8.64E-05 | 3 | 5.78  | 5.54  | 5.28  | 5.48  | 5.45  | 5.66  | 5.75  | 5.90  |
| TC1800052 | NAPG      | 8774          | N-ethylmaleimide-sensitive factor attac    | 2.08E-08 | 3 | 6.72  | 6.14  | 6.50  | 6.78  | 6.60  | 6.69  | 6.72  | 6.63  |
| TC1800501 | NARS      | 4677          | asparaginyl-tRNA synthetase                | 4.40E-14 | 3 | 6.65  | 5.66  | 5.56  | 6.20  | 6.07  | 6.27  | 6.43  | 6.40  |

|           |             |             |                                              |          |   |       |      |      |      |      |      |      |      |
|-----------|-------------|-------------|----------------------------------------------|----------|---|-------|------|------|------|------|------|------|------|
| TC1100499 | NAT11       | 79829       | N-acetyltransferase 11                       | 0.000526 | 3 | 4.63  | 4.45 | 4.40 | 4.41 | 4.46 | 4.51 | 4.62 | 4.51 |
| TC0301459 | NAT13       | 80218       | N-acetyltransferase 13 /// N-acetyltran      | 4.78E-06 | 3 | 8.26  | 7.66 | 7.79 | 7.98 | 8.02 | 8.06 | 7.96 | 8.15 |
| TC1700485 | NBR2        | ---         | Protein NBR2 (Next to BRCA1 gene 2 pr        | 5.52E-05 | 3 | 5.39  | 5.14 | 5.18 | 5.32 | 5.29 | 5.36 | 5.36 | 5.31 |
| TC0700392 | NCF1        | 653361      | neutrophil cytosolic factor 1, (chronic g    | 2.93E-05 | 3 | 9.90  | 9.26 | 9.07 | 9.49 | 9.46 | 9.55 | 9.50 | 9.71 |
| TC0701337 | NCF1        | LOC64653361 | // neutrophil cytosolic factor 1, (chronic g | 3.48E-06 | 3 | 10.06 | 9.40 | 9.21 | 9.63 | 9.61 | 9.66 | 9.66 | 9.86 |
| TC0202386 | NCL         | 4691        | nucleolin /// Nucleolin (Protein C23). [S    | 5.57E-18 | 3 | 7.78  | 7.37 | 7.02 | 7.93 | 8.08 | 8.19 | 8.48 | 8.23 |
| TC1000240 | NCOA4       | MSI8031     | /// nuclear receptor coactivator 4 /// micro | 7.75E-21 | 3 | 7.86  | 6.61 | 6.55 | 6.98 | 7.01 | 7.25 | 7.27 | 7.47 |
| TC1800009 | NDC80       | 10403       | NDC80 homolog, kinetochore complex           | 2.69E-18 | 3 | 3.97  | 3.39 | 3.19 | 3.77 | 4.21 | 4.50 | 4.70 | 4.63 |
| TC1300215 | NDFIP2      | 54602       | Nedd4 family interacting protein 2 /// I     | 1.13E-06 | 3 | 2.88  | 2.84 | 2.91 | 2.99 | 2.87 | 3.01 | 3.12 | 3.15 |
| TC1900854 | NDUFA3      | 4696        | NADH dehydrogenase (ubiquinone) 1 a          | 7.96E-05 | 3 | 6.97  | 6.82 | 6.83 | 7.00 | 7.05 | 7.01 | 7.02 | 6.98 |
| TC0601138 | NEU1        | 4758        | sialidase 1 (lysosomal sialidase)            | 0.000406 | 3 | 5.67  | 5.49 | 5.58 | 5.74 | 5.69 | 5.74 | 5.72 | 5.75 |
| TC2200180 | NF2         | 4771        | neurofibromin 2 (merlin) /// Merlin (M       | 0.000641 | 3 | 3.95  | 3.83 | 3.84 | 3.80 | 3.92 | 3.87 | 3.94 | 3.92 |
| TC2000833 | NFATC2      | 4773        | nuclear factor of activated T-cells, cyto    | 3.05E-13 | 3 | 4.34  | 3.64 | 3.55 | 4.09 | 3.80 | 4.17 | 4.59 | 4.58 |
| TC1600302 | NFATC2IP    | 84901       | nuclear factor of activated T-cells, cyto    | 0.00019  | 3 | 4.38  | 4.37 | 4.15 | 4.26 | 4.40 | 4.47 | 4.47 | 4.37 |
| TC1600535 | NFATC3      | 4775        | nuclear factor of activated T-cells, cyto    | 3.59E-13 | 3 | 6.87  | 6.21 | 6.31 | 6.54 | 6.53 | 6.63 | 6.69 | 6.75 |
| TC0202131 | NFE2L2      | 4780        | nuclear factor (erythroid-derived 2)-like    | 0.000247 | 3 | 4.36  | 4.33 | 4.28 | 4.36 | 4.41 | 4.43 | 4.42 | 4.35 |
| TC0900127 | NFX1        | 4799        | nuclear transcription factor, X-box bind     | 3.63E-11 | 3 | 4.75  | 4.49 | 4.36 | 4.69 | 4.87 | 4.90 | 5.02 | 4.88 |
| TC1201520 | NFYB        | 4801        | nuclear transcription factor Y, beta         | 8.56E-17 | 3 | 4.66  | 4.72 | 4.70 | 4.97 | 4.81 | 5.16 | 5.30 | 5.32 |
| TC1400103 | NGDN        | ---         | Neuroguidin (EIF4E-binding protein). [S      | 8.29E-08 | 3 | 4.44  | 4.34 | 4.33 | 4.51 | 4.53 | 4.62 | 4.77 | 4.68 |
| TC0102976 | NME7        | 29922       | non-metastatic cells 7, protein expressi     | 0.000112 | 3 | 3.60  | 3.48 | 3.52 | 3.58 | 3.49 | 3.60 | 3.78 | 3.74 |
| TC0202002 | NMI         | 9111        | N-myc (and STAT) interactor                  | 0.000234 | 3 | 8.37  | 8.45 | 8.61 | 8.55 | 8.34 | 8.65 | 8.67 | 8.77 |
| TC1000787 | NMT2        | 9397        | N-myristoyltransferase 2 /// Glycylpept      | 1.37E-11 | 3 | 3.99  | 3.62 | 3.66 | 3.77 | 3.72 | 3.85 | 4.07 | 4.06 |
| TC0701105 | NOD1        | 10392       | nucleotide-binding oligomerization dor       | 3.40E-08 | 3 | 3.92  | 3.62 | 3.67 | 3.72 | 3.70 | 3.75 | 3.99 | 3.96 |
| TC1700706 | NOL11       | 25926       | nucleolar protein 11                         | 5.35E-07 | 3 | 3.41  | 3.34 | 3.32 | 3.41 | 3.58 | 3.58 | 3.68 | 3.59 |
| TC0901129 | NOL8        | 55035       | nucleolar protein 8 /// Nucleolar prote      | 2.06E-06 | 3 | 4.91  | 4.34 | 4.29 | 4.57 | 4.63 | 4.68 | 4.91 | 4.71 |
| TC1600198 | NOMO1       | 652388      | // NODAL modulator 1                         | 1.61E-09 | 3 | 6.85  | 6.49 | 6.30 | 6.75 | 6.88 | 6.92 | 6.90 | 6.85 |
| TC1600905 | NOMO2       | 652388      | // NODAL modulator 2                         | 5.74E-10 | 3 | 6.84  | 6.51 | 6.32 | 6.76 | 6.88 | 6.94 | 6.92 | 6.84 |
| TC1600211 | NOMO3       | 652388      | // NODAL modulator 3                         | 6.72E-09 | 3 | 7.02  | 6.63 | 6.46 | 6.91 | 7.06 | 7.10 | 7.06 | 7.01 |
| TC0800523 | NOV         | 4856        | nephroblastoma overexpressed gene            | 8.51E-25 | 3 | 6.60  | 5.21 | 4.69 | 5.07 | 5.10 | 6.24 | 6.41 | 6.74 |
| TC1700386 | NP_996890.1 | 730424      | chemokine (C-C motif) ligand 4-like 2 pr     | 2.49E-06 | 3 | 4.62  | 4.60 | 4.38 | 5.20 | 4.99 | 5.58 | 5.89 | 5.97 |
| TC1101806 | NPAT        | 4863        | nuclear protein, ataxia-telangiectasia lc    | 4.29E-05 | 3 | 5.80  | 6.08 | 5.69 | 5.71 | 5.76 | 5.96 | 5.97 | 6.07 |
| TC1400993 | NPC2        | 10577       | Niemann-Pick disease, type C2                | 1.61E-17 | 3 | 7.62  | 7.50 | 7.28 | 7.51 | 7.52 | 7.95 | 8.08 | 8.20 |
| TC0300108 | NR1D2       | 9975        | nuclear receptor subfamily 1, group D,       | 0.000169 | 3 | 3.71  | 3.66 | 3.67 | 3.74 | 3.67 | 3.72 | 3.86 | 3.89 |
| TC0501372 | NR3C1       | 2908        | nuclear receptor subfamily 3, group C,       | 6.12E-07 | 3 | 6.88  | 6.64 | 6.91 | 7.01 | 6.81 | 6.83 | 6.75 | 6.85 |

|           |                 |        |                                          |          |   |      |      |      |      |      |      |      |      |
|-----------|-----------------|--------|------------------------------------------|----------|---|------|------|------|------|------|------|------|------|
| TC0500838 | NSUN2           | 54888  | NOL1/NOP2/Sun domain family, memb        | 3.27E-06 | 3 | 5.14 | 4.71 | 4.77 | 4.97 | 4.91 | 4.98 | 5.18 | 5.05 |
| TC0600659 | NT5DC1          | 221294 | 5'-nucleotidase domain containing 1 //   | 4.58E-07 | 3 | 4.37 | 4.16 | 4.09 | 4.21 | 4.21 | 4.33 | 4.42 | 4.48 |
| TC0700893 | NUB1            | 51667  | negative regulator of ubiquitin-like pro | 1.99E-15 | 3 | 7.58 | 7.06 | 6.64 | 6.97 | 6.90 | 7.40 | 7.65 | 7.81 |
| TC0100301 | NUDC            | 10726  | nuclear distribution gene C homolog (A   | 1.25E-12 | 3 | 7.27 | 7.02 | 7.02 | 7.30 | 7.24 | 7.39 | 7.60 | 7.52 |
| TC0701173 | NUDCD3          | 23386  | NudC domain containing 3 /// NudC do     | 0.000347 | 3 | 4.55 | 4.34 | 4.30 | 4.46 | 4.44 | 4.47 | 4.47 | 4.45 |
| TC1300131 | NUDT15          | 55270  | nudix (nucleoside diphosphate linked n   | 0.000521 | 3 | 3.59 | 3.53 | 3.47 | 3.58 | 3.73 | 3.70 | 3.81 | 3.69 |
| TC1000768 | NUDT5           | 11164  | nudix (nucleoside diphosphate linked n   | 5.19E-10 | 3 | 6.17 | 5.30 | 5.33 | 5.66 | 5.47 | 5.79 | 5.88 | 5.84 |
| TC0103332 | NUP133          | 55746  | nucleoporin 133kDa /// Nuclear pore c    | 0.000564 | 3 | 3.82 | 3.69 | 3.78 | 3.84 | 3.83 | 3.83 | 3.96 | 3.92 |
| TC1101363 | NUP160          | 23279  | nucleoporin 160kDa /// Nuclear pore c    | 5.10E-10 | 3 | 4.46 | 4.04 | 3.93 | 4.11 | 4.14 | 4.32 | 4.52 | 4.42 |
| TC2200350 | NUP50           | 10762  | nucleoporin 50kDa                        | 5.35E-06 | 3 | 8.15 | 7.74 | 7.73 | 7.86 | 7.83 | 7.99 | 7.97 | 8.05 |
| TC1600463 | NUP93           | 9688   | nucleoporin 93kDa                        | 6.80E-15 | 3 | 5.43 | 5.04 | 4.83 | 5.19 | 5.19 | 5.40 | 5.72 | 5.71 |
| TC1901282 | NY-SAR-48 /// I | 93323  | sarcoma antigen NY-SAR-48 /// sarcom     | 4.00E-13 | 3 | 5.00 | 4.76 | 4.62 | 4.94 | 5.08 | 5.10 | 5.21 | 5.11 |
| TC1200712 | OAS1            | 4938   | 2',5'-oligoadenylate synthetase 1, 40/4  | 4.47E-07 | 3 | 5.08 | 4.68 | 4.48 | 4.86 | 4.46 | 5.23 | 6.10 | 6.59 |
| TC1200714 | OAS2            | 4939   | 2'-5'-oligoadenylate synthetase 2, 69/7  | 7.60E-07 | 3 | 4.61 | 4.28 | 4.04 | 4.34 | 4.04 | 4.81 | 5.74 | 6.12 |
| TC1200713 | OAS3            | 4940   | 2'-5'-oligoadenylate synthetase 3, 100k  | 2.13E-06 | 3 | 5.08 | 4.92 | 4.62 | 4.80 | 4.75 | 5.19 | 5.66 | 5.88 |
| TC1201637 | OASL            | 8638   | 2'-5'-oligoadenylate synthetase-like     | 9.74E-11 | 3 | 6.40 | 5.49 | 5.08 | 6.25 | 6.16 | 6.70 | 6.91 | 7.20 |
| TC0400935 | OCIAD2          | 132299 | OCIA domain containing 2                 | 2.90E-11 | 3 | 4.80 | 4.72 | 4.60 | 4.99 | 4.89 | 5.23 | 5.42 | 5.42 |
| TC0201307 | ODC1            | 4953   | ornithine decarboxylase 1                | 6.03E-07 | 3 | 5.94 | 5.72 | 5.53 | 6.00 | 6.30 | 6.53 | 6.37 | 6.37 |
| TC1600448 | OGFOD1          | 55239  | 2-oxoglutarate and iron-dependent oxy    | 6.84E-13 | 3 | 4.33 | 3.92 | 4.07 | 4.37 | 4.46 | 4.51 | 4.65 | 4.52 |
| TC2100083 | OLIG1           | 116448 | oligodendrocyte transcription factor 1   | 5.17E-12 | 3 | 5.12 | 4.08 | 4.40 | 5.06 | 4.91 | 4.94 | 5.18 | 5.21 |
| TC2100082 | OLIG2           | 10215  | oligodendrocyte lineage transcription f  | 7.93E-10 | 3 | 4.07 | 3.77 | 3.77 | 4.06 | 4.06 | 4.10 | 4.13 | 4.21 |
| TC1101444 | OSBP            | 5007   | oxysterol binding protein /// Oxysterol  | 2.26E-06 | 3 | 5.46 | 5.41 | 5.33 | 5.53 | 5.43 | 5.59 | 5.69 | 5.66 |
| TC1400670 | OSGEP           | 55644  | O-sialoglycoprotein endopeptidase        | 1.23E-10 | 3 | 4.84 | 4.24 | 4.38 | 4.48 | 4.51 | 4.64 | 4.72 | 4.74 |
| TC0800420 | OSGIN2          | 734    | oxidative stress induced growth inhibiti | 1.36E-08 | 3 | 6.27 | 6.17 | 6.10 | 6.41 | 6.46 | 6.82 | 6.80 | 6.81 |
| TC0100214 | OTUD3           | 23252  | OTU domain containing 3                  | 0.000165 | 3 | 3.75 | 3.55 | 3.58 | 3.60 | 3.74 | 3.72 | 3.74 | 3.69 |
| TC0401302 | OTUD4           | 54726  | OTU domain containing 4                  | 7.29E-09 | 3 | 5.31 | 5.28 | 5.33 | 5.36 | 5.31 | 5.60 | 5.80 | 5.74 |
| TC1800421 | P15RS /// NP_C  | 55197  | cyclin-dependent kinase 2B-inhibitor-re  | 7.33E-05 | 3 | 5.11 | 4.79 | 4.90 | 5.13 | 5.08 | 5.14 | 5.05 | 5.02 |
| TC0301667 | P2RY14          | 9934   | purinergic receptor P2Y, G-protein couj  | 6.07E-08 | 3 | 6.13 | 5.44 | 4.96 | 6.09 | 5.64 | 6.39 | 7.04 | 7.24 |
| TC1100652 | P2RY2           | 5029   | purinergic receptor P2Y, G-protein couj  | 8.73E-06 | 3 | 5.46 | 5.20 | 5.13 | 5.32 | 5.28 | 5.40 | 5.36 | 5.39 |
| TC0X00732 | P2RY8           | 286530 | purinergic receptor P2Y, G-protein couj  | 6.45E-06 | 3 | 5.49 | 5.43 | 5.35 | 5.47 | 5.67 | 5.62 | 5.65 | 5.61 |
| TC1200422 | PA2G4           | 5036   | proliferation-associated 2G4, 38kDa      | 1.26E-10 | 3 | 7.12 | 6.57 | 6.40 | 6.97 | 7.20 | 7.23 | 7.36 | 7.07 |
| TC0102009 | PAFAH2          | 5051   | platelet-activating factor acetylhydra   | 1.84E-13 | 3 | 4.75 | 4.27 | 4.34 | 4.64 | 4.47 | 4.63 | 4.79 | 4.83 |
| TC2000046 | PANK2           | 80025  | pantothenate kinase 2 (Hallervorden-Sj   | 9.93E-05 | 3 | 6.55 | 6.42 | 6.46 | 6.51 | 6.37 | 6.52 | 6.57 | 6.65 |
| TC2200378 | PANX2           | 56666  | pannexin 2                               | 5.24E-05 | 3 | 6.38 | 6.31 | 6.22 | 6.28 | 6.41 | 6.44 | 6.40 | 6.41 |

|           |                                                               |          |                                                |          |   |       |       |      |       |       |       |       |       |
|-----------|---------------------------------------------------------------|----------|------------------------------------------------|----------|---|-------|-------|------|-------|-------|-------|-------|-------|
| TC1000858 | PAPD1 /// Q6Z                                                 | 55149    | PAP associated domain containing 1 ///         | 1.14E-06 | 3 | 4.13  | 4.09  | 4.10 | 4.10  | 4.15  | 4.20  | 4.24  | 4.24  |
| TC1600420 | PAPD5                                                         | 64282    | PAP associated domain containing 5             | 2.58E-07 | 3 | 6.30  | 6.05  | 6.27 | 6.46  | 6.32  | 6.45  | 6.57  | 6.56  |
| TC0401071 | PAQR3                                                         | 152559   | progesterone and adiponectin receptor family r | 7.36E-05 | 3 | 3.50  | 3.33  | 3.35 | 3.40  | 3.31  | 3.48  | 3.55  | 3.51  |
| TC0102006 | PAQR7                                                         | 164091   | progesterone and adiponectin receptor family r | 2.03E-14 | 3 | 4.08  | 3.82  | 3.70 | 4.01  | 4.13  | 4.28  | 4.45  | 4.52  |
| TC1600877 | PARN                                                          | 5073     | poly(A)-specific ribonuclease (deadenyl        | 7.64E-06 | 3 | 5.94  | 5.62  | 5.58 | 5.68  | 5.61  | 5.72  | 5.92  | 5.84  |
| TC0701680 | PARP12                                                        | 64761    | poly (ADP-ribose) polymerase family, n         | 4.55E-10 | 3 | 5.97  | 5.14  | 4.94 | 5.20  | 5.23  | 5.51  | 5.87  | 5.98  |
| TC0300556 | PARP14                                                        | 54625    | poly (ADP-ribose) polymerase family, n         | 2.43E-12 | 3 | 7.92  | 6.72  | 6.16 | 6.76  | 6.46  | 7.41  | 7.78  | 8.10  |
| TC1400027 | PARP2                                                         | 10038    | poly (ADP-ribose) polymerase family, n         | 1.14E-09 | 3 | 4.38  | 4.14  | 4.08 | 4.46  | 4.70  | 4.78  | 4.85  | 4.52  |
| TC0301497 | PARP9                                                         | 83666    | poly (ADP-ribose) polymerase family, n         | 1.52E-05 | 3 | 7.35  | 7.05  | 7.08 | 7.16  | 6.90  | 7.28  | 7.43  | 7.59  |
| TC0701785 | PAXIP1                                                        | 22976    | PAX interacting (with transcription-acti       | 1.46E-05 | 3 | 4.70  | 4.39  | 4.52 | 4.43  | 4.54  | 4.55  | 4.66  | 4.60  |
| TC0102817 | PBXIP1                                                        | 57326    | pre-B-cell leukemia homeobox interact          | 1.82E-11 | 3 | 5.91  | 5.52  | 5.52 | 5.62  | 5.60  | 5.75  | 5.77  | 5.82  |
| TC1000439 | PCGF5                                                         | 84333    | polycomb group ring finger 5 /// Polycc        | 2.16E-16 | 3 | 5.71  | 5.15  | 5.02 | 5.64  | 5.43  | 6.11  | 6.38  | 6.60  |
| TC1201473 | PCK2                                                          | 5128     | PCK2 protein kinase 2                          | 1.12E-07 | 3 | 5.86  | 5.72  | 5.57 | 5.63  | 5.58  | 5.89  | 6.01  | 6.01  |
| TC1000556 | PDCD11                                                        | 22984    | programmed cell death 11                       | 0.000416 | 3 | 4.21  | 4.08  | 4.12 | 4.12  | 4.19  | 4.18  | 4.26  | 4.18  |
| TC1000583 | PDCD4                                                         | 27250    | programmed cell death 4 (neoplastic tr         | 1.18E-17 | 3 | 8.03  | 7.77  | 7.17 | 7.37  | 7.40  | 7.83  | 8.00  | 8.16  |
| TC0701433 | PDK4                                                          | 5166     | pyruvate dehydrogenase kinase, isozym          | 1.03E-08 | 3 | 4.26  | 4.03  | 4.25 | 4.98  | 4.59  | 4.87  | 5.31  | 5.37  |
| TC0701412 | PEX1                                                          | 5189     | peroxisome biogenesis factor 1                 | 3.32E-07 | 3 | 4.02  | 3.64  | 3.75 | 3.85  | 3.78  | 3.83  | 3.98  | 3.88  |
| TC1000968 | PGBD3 /// ERC 267004 // piggyBac transposable element derived | 9.37E-23 |                                                |          | 3 | 5.47  | 4.64  | 4.54 | 4.82  | 4.87  | 4.96  | 5.14  | 5.18  |
| TC0601425 | PGM3                                                          | 5238     | phosphoglucomutase 3 /// Phosphoace            | 0.00062  | 3 | 3.91  | 3.78  | 3.74 | 3.76  | 3.86  | 3.84  | 3.96  | 3.84  |
| TC2200705 | PHF5A                                                         | 84844    | PHD finger protein 5A                          | 3.52E-11 | 3 | 5.04  | 4.78  | 4.60 | 5.00  | 4.98  | 5.18  | 5.23  | 5.32  |
| TC2000307 | PI3                                                           | 5266     | peptidase inhibitor 3, skin-derived (SKA       | 1.51E-06 | 3 | 9.64  | 9.28  | 8.77 | 10.05 | 10.28 | 10.37 | 10.48 | 10.18 |
| TC1800446 | PIAS2                                                         | 9063     | protein inhibitor of activated STAT, 2 //      | 3.27E-08 | 3 | 3.90  | 3.60  | 3.85 | 4.24  | 3.88  | 3.91  | 4.15  | 4.04  |
| TC0201488 | PIGF                                                          | 5281     | phosphatidylinositol glycan anchor bio:        | 2.17E-05 | 3 | 4.64  | 4.27  | 4.58 | 4.64  | 4.52  | 4.58  | 4.61  | 4.56  |
| TC0300939 | PIGX                                                          | 54965    | phosphatidylinositol glycan anchor bio:        | 8.95E-13 | 3 | 5.73  | 4.89  | 5.05 | 5.27  | 5.17  | 5.40  | 5.57  | 5.72  |
| TC1101230 | PIK3C2A                                                       | 5286     | phosphoinositide-3-kinase, class 2, alp        | 5.52E-11 | 3 | 5.18  | 4.82  | 4.65 | 4.79  | 4.69  | 4.92  | 5.07  | 5.14  |
| TC0102219 | PIK3R3                                                        | 8503     | phosphoinositide-3-kinase, regulatory s        | 9.25E-11 | 3 | 4.17  | 3.96  | 3.99 | 4.23  | 4.09  | 4.31  | 4.52  | 4.69  |
| TC0700541 | PILRA                                                         | 29992    | paired immunoglobulin-like type 2 recep        | 5.22E-10 | 3 | 10.76 | 10.09 | 9.63 | 10.32 | 10.22 | 10.43 | 10.45 | 10.73 |
| TC0800736 | PINX1 /// PINX                                                | 54984    | PIN2-interacting protein 1 /// Pin2-inte       | 0.000617 | 3 | 3.53  | 3.46  | 3.38 | 3.45  | 3.64  | 3.57  | 3.74  | 3.55  |
| TC1000819 | PIP4K2A                                                       | 5305     | phosphatidylinositol-5-phosphate 4-kin         | 0.000421 | 3 | 8.22  | 7.83  | 7.77 | 8.25  | 8.09  | 8.01  | 8.09  | 8.04  |
| TC1701280 | PIP4K2B                                                       | 8396     | phosphatidylinositol-5-phosphate 4-kin         | 1.59E-06 | 3 | 5.34  | 5.12  | 5.17 | 5.43  | 5.39  | 5.45  | 5.53  | 5.39  |
| TC1200454 | PIP4K2C                                                       | 79837    | phosphatidylinositol-5-phosphate 4-kin         | 2.60E-05 | 3 | 5.50  | 5.23  | 5.20 | 5.43  | 5.42  | 5.48  | 5.51  | 5.51  |
| TC0900280 | PIP5K1B                                                       | 8395     | phosphatidylinositol-4-phosphate 5-kin         | 1.97E-08 | 3 | 4.55  | 4.12  | 4.39 | 4.54  | 4.44  | 4.59  | 4.78  | 4.79  |
| TC2200554 | PITPNB                                                        | 23760    | phosphatidylinositol transfer protein, b       | 3.47E-09 | 3 | 7.37  | 7.18  | 7.16 | 7.49  | 7.40  | 7.53  | 7.67  | 7.54  |
| TC0400383 | PKD2                                                          | 5311     | polycystic kidney disease 2 (autosomal         | 1.96E-08 | 3 | 3.92  | 3.88  | 3.63 | 3.81  | 3.95  | 4.01  | 4.10  | 4.06  |

|           |                |           |                                         |          |   |      |      |      |      |      |      |      |      |
|-----------|----------------|-----------|-----------------------------------------|----------|---|------|------|------|------|------|------|------|------|
| TC0200807 | PKP4           | 8502      | plakophilin 4                           | 1.16E-05 | 3 | 5.23 | 4.83 | 4.55 | 4.85 | 5.26 | 5.21 | 5.13 | 4.98 |
| TC1901567 | PLAUR          | 5329      | plasminogen activator, urokinase recep  | 1.49E-05 | 3 | 7.76 | 7.42 | 6.92 | 7.33 | 7.39 | 7.62 | 7.53 | 7.74 |
| TC1800221 | PMAIP1         | 5366      | phorbol-12-myristate-13-acetate-induc   | 1.68E-23 | 3 | 6.10 | 4.85 | 4.89 | 5.43 | 5.33 | 6.35 | 6.49 | 6.93 |
| TC1600159 | PMM2           | 5373      | phosphomannomutase 2                    | 0.000753 | 3 | 4.37 | 4.23 | 4.14 | 4.24 | 4.39 | 4.45 | 4.46 | 4.41 |
| TC0700991 | PMS2           | 5395      | PMS2 postmeiotic segregation increase   | 0.00066  | 3 | 4.22 | 3.89 | 4.02 | 4.15 | 4.07 | 4.11 | 4.24 | 4.11 |
| TC0X00679 | PNMA6A         | 84968     | paraneoplastic antigen like 6A          | 3.10E-10 | 3 | 5.60 | 4.70 | 4.20 | 4.48 | 4.44 | 5.54 | 5.69 | 5.90 |
| TC0201529 | PNPT1          | 87178     | polyribonucleotide nucleotidyltransfer  | 1.21E-06 | 3 | 3.26 | 3.14 | 3.03 | 3.09 | 3.20 | 3.41 | 3.79 | 3.61 |
| TC0800255 | POLB           | 5423      | polymerase (DNA directed), beta         | 7.60E-18 | 3 | 6.53 | 5.87 | 5.30 | 5.49 | 5.35 | 6.25 | 6.46 | 6.90 |
| TC0600413 | POLH           | 5429      | polymerase (DNA directed), eta /// DN   | 8.00E-07 | 3 | 4.42 | 4.30 | 4.26 | 4.45 | 4.57 | 4.57 | 4.74 | 4.57 |
| TC2200269 | POLR2F /// Q5J | 5435      | polymerase (RNA) II (DNA directed) pol  | 1.64E-05 | 3 | 5.19 | 5.11 | 5.12 | 5.23 | 5.21 | 5.25 | 5.30 | 5.30 |
| TC1200661 | POLR3B         | 55703     | polymerase (RNA) III (DNA directed) po  | 3.82E-06 | 3 | 3.87 | 3.78 | 3.77 | 3.94 | 4.03 | 4.01 | 4.11 | 4.01 |
| TC0101261 | POU2F1         | 5451      | POU class 2 homeobox 1 /// POU doma     | 2.56E-10 | 3 | 5.67 | 5.49 | 5.27 | 5.42 | 5.34 | 5.53 | 5.59 | 5.59 |
| TC0800884 | PPAPDC1B       | 84513     | phosphatidic acid phosphatase type 2 c  | 4.15E-05 | 3 | 4.72 | 4.51 | 4.46 | 4.54 | 4.65 | 4.65 | 4.71 | 4.65 |
| TC0900021 | PPAPDC2        | 403313    | phosphatidic acid phosphatase type 2 c  | 7.44E-06 | 3 | 4.94 | 4.62 | 4.80 | 4.81 | 4.77 | 5.03 | 5.07 | 5.11 |
| TC1000370 | PPIF           | 10105     | peptidylprolyl isomerase F (cyclophilin | 2.56E-11 | 3 | 6.28 | 5.62 | 5.17 | 5.53 | 5.66 | 6.06 | 5.98 | 6.16 |
| TC0401114 | PPM1K          | 152926    | protein phosphatase 1K (PP2C domain     | 0.000246 | 3 | 3.66 | 3.52 | 3.53 | 3.60 | 3.52 | 3.67 | 3.93 | 3.83 |
| TC1201566 | PPP1CC         | 5501      | protein phosphatase 1, catalytic subun  | 6.09E-24 | 3 | 7.74 | 6.42 | 6.88 | 7.38 | 7.23 | 7.47 | 7.71 | 7.78 |
| TC1900696 | PPP1R15A       | 23645     | protein phosphatase 1, regulatory (inhi | 0.000857 | 3 | 7.51 | 7.59 | 7.19 | 7.29 | 7.38 | 7.55 | 7.52 | 7.67 |
| TC1400719 | PPP1R3E /// H  | 90673 /// | protein phosphatase 1, regulatory (inhi | 7.68E-10 | 3 | 4.81 | 4.44 | 4.45 | 4.62 | 4.66 | 4.71 | 4.76 | 4.67 |
| TC1701514 | PPP1R9B        | 84687     | protein phosphatase 1, regulatory (inhi | 9.71E-14 | 3 | 8.32 | 6.58 | 6.75 | 7.26 | 7.21 | 7.44 | 7.61 | 7.79 |
| TC0800141 | PPP3CC         | 5533      | protein phosphatase 3 (formerly 2B), c  | 2.06E-05 | 3 | 4.35 | 4.21 | 4.33 | 4.48 | 4.41 | 4.47 | 4.72 | 4.59 |
| TC1201564 | PPTC7          | 160760    | PTC7 protein phosphatase homolog (S.    | 1.78E-17 | 3 | 7.59 | 6.52 | 6.68 | 7.16 | 7.07 | 7.36 | 7.33 | 7.51 |
| TC0200041 | PQLC3          | 130814    | PQ loop repeat containing 3             | 0.000156 | 3 | 4.15 | 4.12 | 4.08 | 4.31 | 4.21 | 4.29 | 4.39 | 4.33 |
| TC0600596 | PRDM1          | 639       | PR domain containing 1, with ZNF dom    | 7.89E-14 | 3 | 7.80 | 6.93 | 6.42 | 6.65 | 6.44 | 7.16 | 7.46 | 7.68 |
| TC0701774 | PRKAG2         | 51422     | protein kinase, AMP-activated, gamma    | 7.90E-19 | 3 | 4.91 | 4.29 | 4.32 | 4.69 | 4.49 | 4.79 | 5.02 | 5.16 |
| TC0200215 | PRKCE          | 5581      | protein kinase C, epsilon               | 3.58E-08 | 3 | 4.03 | 3.94 | 3.83 | 3.91 | 3.85 | 3.97 | 4.03 | 4.10 |
| TC0202137 | PRKRA          | 8575      | protein kinase, interferon-inducible do | 1.69E-05 | 3 | 3.81 | 3.80 | 3.72 | 3.80 | 3.85 | 3.79 | 3.92 | 3.96 |
| TC0X00742 | PRKX           | 729116 // | protein kinase, X-linked                | 1.80E-11 | 3 | 4.68 | 4.38 | 4.34 | 4.75 | 4.60 | 4.73 | 5.03 | 4.98 |
| TC1400196 | PRPF39         | 55015     | PRP39 pre-mRNA processing factor 39     | 2.39E-06 | 3 | 3.68 | 3.30 | 3.39 | 3.52 | 3.61 | 3.57 | 3.72 | 3.63 |
| TC1100258 | PRRG4          | 79056     | proline rich Gla (G-carboxyglutamic aci | 1.79E-12 | 3 | 7.43 | 6.00 | 6.23 | 7.11 | 6.97 | 7.31 | 7.60 | 7.72 |
| TC0900789 | PSIP1          | 11168     | PC4 and SFRS1 interacting protein 1 /// | 5.03E-11 | 3 | 7.97 | 7.33 | 7.42 | 7.74 | 7.57 | 7.75 | 7.99 | 7.99 |
| TC0601164 | PSMB8          | 5696      | proteasome (prosome, macropain) sub     | 1.11E-06 | 3 | 6.02 | 5.30 | 5.31 | 5.54 | 5.36 | 5.68 | 5.66 | 5.86 |
| TC0600297 | PSMB9          | 5698      | proteasome (prosome, macropain) sub     | 7.60E-07 | 3 | 7.63 | 7.20 | 7.17 | 7.33 | 7.22 | 7.68 | 7.70 | 7.79 |
| TC1400118 | PSME1          | 5720      | proteasome (prosome, macropain) acti    | 7.35E-12 | 3 | 8.78 | 8.54 | 8.39 | 8.60 | 8.48 | 8.84 | 8.96 | 9.07 |



|           |                 |        |                                           |          |   |      |      |      |      |      |      |      |      |
|-----------|-----------------|--------|-------------------------------------------|----------|---|------|------|------|------|------|------|------|------|
| TC1400736 | PSME2           | 5721   | proteasome (prosome, macropain) acti      | 1.98E-11 | 3 | 5.90 | 5.25 | 4.87 | 5.23 | 5.21 | 5.68 | 5.99 | 6.18 |
| TC1900018 | PTBP1           | 5725   | polypyrimidine tract binding protein 1    | 7.54E-05 | 3 | 5.72 | 5.51 | 5.47 | 5.70 | 5.80 | 5.73 | 5.76 | 5.73 |
| TC0500141 | PTGER4          | 730882 | // prostaglandin E receptor 4 (subtype EP | 3.80E-22 | 3 | 6.19 | 4.89 | 4.82 | 5.49 | 5.30 | 5.76 | 5.75 | 6.03 |
| TC0103081 | PTGS2           | 5743   | prostaglandin-endoperoxide synthase 2     | 8.80E-11 | 3 | 8.76 | 8.88 | 7.78 | 7.77 | 8.00 | 8.98 | 8.68 | 9.22 |
| TC0800583 | PTP4A3          | 11156  | protein tyrosine phosphatase type IVA, c  | 5.30E-14 | 3 | 6.39 | 5.80 | 5.69 | 5.99 | 6.01 | 6.37 | 6.25 | 6.36 |
| TC0200633 | PTPN4           | 5775   | protein tyrosine phosphatase, non-recept  | 8.82E-07 | 3 | 4.35 | 3.91 | 4.07 | 4.16 | 4.00 | 4.13 | 4.31 | 4.30 |
| TC1701570 | PTRH2 /// Q96I  | 51651  | peptidyl-tRNA hydrolase 2 /// CDNA FL     | 3.32E-12 | 3 | 4.97 | 4.27 | 4.10 | 4.51 | 4.51 | 4.61 | 4.72 | 4.71 |
| TC0201343 | PUM2            | 23369  | pumilio homolog 2 (Drosophila) /// Pur    | 9.43E-05 | 3 | 7.77 | 7.60 | 7.52 | 7.59 | 7.51 | 7.72 | 7.72 | 7.78 |
| TC0701180 | PURB            | 5814   | purine-rich element binding protein B     | 3.77E-05 | 3 | 5.54 | 5.36 | 5.32 | 5.25 | 5.21 | 5.43 | 5.57 | 5.56 |
| TC0501460 | PWWP2A          | 114825 | PWWP domain containing 2A                 | 5.60E-05 | 3 | 4.79 | 4.42 | 4.60 | 4.71 | 4.71 | 4.72 | 4.83 | 4.78 |
| TC0901006 | Q5JTY1_HUMA --- |        | COBW domain containing 3 (DC36 prot       | 5.21E-06 | 3 | 7.27 | 6.37 | 6.38 | 6.90 | 6.63 | 6.99 | 7.15 | 7.07 |
| TC0600261 | Q5SS58_HUMA --- |        | MHC class I polypeptide-related sequer    | 2.23E-05 | 3 | 4.91 | 4.60 | 4.72 | 4.72 | 4.67 | 4.80 | 4.88 | 4.87 |
| TC1701627 | Q6GMT2_HUM ---  |        |                                           | 8.16E-07 | 3 | 4.08 | 3.77 | 3.79 | 3.84 | 3.73 | 3.88 | 4.04 | 4.11 |
| TC1600670 | Q6ZP14_HUM/ --- |        | CDNA FLJ26728 fis, clone PNC06635. [S     | 0.000999 | 3 | 4.53 | 4.32 | 4.46 | 4.38 | 4.33 | 4.56 | 4.65 | 4.66 |
| TC0600348 | Q6ZV19_HUM/ --- |        | CDNA FLJ43093 fis, clone CORDB10001       | 2.93E-05 | 3 | 4.88 | 4.56 | 4.50 | 4.65 | 4.71 | 4.81 | 4.86 | 4.80 |
| TC1700779 | Q6ZVW4_HUM ---  |        | CDNA FLJ41999 fis, clone SPLEN202968      | 5.09E-07 | 3 | 4.72 | 4.13 | 4.16 | 4.37 | 4.44 | 4.48 | 4.48 | 4.52 |
| TC1901169 | Q71MM4_HUM ---  |        |                                           | 2.66E-09 | 3 | 6.17 | 5.52 | 5.45 | 6.07 | 6.30 | 6.69 | 6.93 | 6.59 |
| TC2000228 | Q8N2C8_HUM.     | 51230  | PHD finger protein 20 /// PHD finger pr   | 2.54E-17 | 3 | 7.61 | 6.91 | 6.60 | 6.99 | 6.92 | 7.22 | 7.46 | 7.51 |
| TC0900116 | Q8N7I0_HUMA --- |        | CDNA FLJ25547 fis, clone JTH01487 (Ti     | 2.18E-08 | 3 | 4.86 | 4.49 | 4.53 | 4.68 | 4.78 | 4.83 | 4.74 | 4.81 |
| TC0401279 | Q8N984_HUM, --- |        | CDNA FLJ38235 fis, clone FCBBF200542      | 0.000184 | 3 | 2.86 | 2.83 | 2.90 | 2.83 | 2.97 | 2.97 | 3.03 | 3.04 |
| TC0103220 | Q8TAF5_HUM/ --- |        |                                           | 7.43E-09 | 3 | 4.38 | 3.84 | 3.75 | 3.99 | 4.12 | 4.29 | 4.45 | 4.54 |
| TC1900911 | Q96HF5_HUM/ --- |        | MGC9913 protein. [Source:Uniprot/SP1      | 8.68E-05 | 3 | 4.62 | 4.31 | 4.37 | 4.75 | 4.56 | 4.66 | 4.66 | 4.71 |
| TC2000775 | Q96JR8_HUMA --- |        |                                           | 1.81E-05 | 3 | 4.40 | 3.63 | 3.69 | 3.86 | 3.87 | 4.10 | 4.55 | 4.17 |
| TC1000241 | Q9P1K1_HUM/ --- |        |                                           | 1.07E-05 | 3 | 5.62 | 5.06 | 5.11 | 5.50 | 5.63 | 5.76 | 5.92 | 5.76 |
| TC0600867 | QKI             | 9444   | quaking homolog, KH domain RNA binc       | 0.000101 | 3 | 7.39 | 7.15 | 7.10 | 7.27 | 7.15 | 7.37 | 7.37 | 7.47 |
| TC0800878 | RAB11FIP1       | 80223  | RAB11 family interacting protein 1 (clas  | 2.27E-12 | 3 | 8.10 | 7.19 | 7.27 | 7.58 | 7.50 | 7.77 | 7.73 | 7.89 |
| TC2000408 | RAB22A          | 57403  | RAB22A, member RAS oncogene family        | 6.14E-05 | 3 | 6.89 | 6.84 | 6.86 | 7.01 | 6.92 | 7.15 | 7.17 | 7.16 |
| TC1700742 | RAB37           | 326624 | RAB37, member RAS oncogene family /       | 1.30E-15 | 3 | 6.42 | 5.73 | 5.59 | 5.92 | 5.79 | 6.08 | 6.15 | 6.27 |
| TC1700066 | RABEP1          | 9135   | rabaptin, RAB GTPase binding effector     | 4.39E-06 | 3 | 5.90 | 5.65 | 5.55 | 5.74 | 5.70 | 5.87 | 6.11 | 5.96 |
| TC0101299 | RABGAP1L        | 9910   | RAB GTPase activating protein 1-like //,  | 6.56E-06 | 3 | 6.41 | 5.94 | 5.94 | 6.14 | 6.06 | 6.23 | 6.26 | 6.27 |
| TC1200694 | RAD9B           | 144715 | RAD9 homolog B (S. cerevisiae)            | 3.51E-05 | 3 | 3.36 | 3.07 | 3.15 | 3.24 | 3.24 | 3.24 | 3.23 | 3.27 |
| TC0100837 | RAP1A           | 5906   | RAP1A, member of RAS oncogene fami        | 0.000259 | 3 | 8.87 | 8.65 | 8.85 | 8.90 | 8.81 | 8.85 | 8.83 | 8.88 |
| TC1100494 | RARRES3         | 5920   | retinoic acid receptor responder (tazar   | 7.03E-11 | 3 | 5.44 | 5.34 | 4.56 | 5.21 | 4.91 | 5.69 | 6.18 | 6.72 |
| TC1500827 | RASGRP1         | 10125  | RAS guanyl releasing protein 1 (calcium   | 0.000477 | 3 | 3.88 | 3.84 | 3.58 | 3.80 | 3.81 | 3.84 | 3.96 | 3.89 |

|           |         |        |                                            |          |   |      |      |      |      |      |      |      |      |
|-----------|---------|--------|--------------------------------------------|----------|---|------|------|------|------|------|------|------|------|
| TC0103159 | RBBP5   | 5929   | retinoblastoma binding protein 5 /// R     | 1.43E-05 | 3 | 6.31 | 6.10 | 6.25 | 6.35 | 6.22 | 6.40 | 6.45 | 6.50 |
| TC1600272 | RBBP6   | 5930   | retinoblastoma binding protein 6 /// R     | 5.93E-08 | 3 | 6.43 | 6.14 | 5.70 | 5.87 | 5.92 | 6.13 | 6.38 | 6.31 |
| TC0X00791 | RBBP7   | 5931   | retinoblastoma binding protein 7 /// Hi    | 2.87E-12 | 3 | 5.21 | 4.97 | 4.94 | 5.34 | 5.58 | 5.53 | 5.64 | 5.46 |
| TC2000010 | RBCK1   | 10616  | RanBP-type and C3HC4-type zinc finger      | 0.000891 | 3 | 5.98 | 5.86 | 5.85 | 5.85 | 5.85 | 5.97 | 5.97 | 6.03 |
| TC0901307 | RBM18   | 92400  | RNA binding motif protein 18               | 0.000133 | 3 | 5.64 | 5.63 | 5.62 | 5.80 | 5.70 | 5.80 | 5.89 | 5.94 |
| TC1300564 | RBM26   | 64062  | RNA binding motif protein 26 /// RNA-t     | 3.60E-10 | 3 | 6.03 | 5.42 | 5.47 | 5.56 | 5.55 | 5.75 | 5.95 | 5.84 |
| TC0500572 | RBM27   | ---    | RNA-binding protein 27 (RNA-binding n      | 6.29E-07 | 3 | 6.54 | 6.51 | 6.47 | 6.59 | 6.50 | 6.72 | 6.88 | 6.86 |
| TC0701614 | RBM28   | 55131  | RNA binding motif protein 28               | 3.82E-12 | 3 | 4.98 | 4.61 | 4.70 | 4.97 | 5.04 | 5.09 | 5.18 | 5.08 |
| TC0103368 | RBM34   | 23029  | RNA binding motif protein 34 /// RNA-t     | 5.15E-08 | 3 | 6.07 | 5.87 | 5.81 | 5.99 | 5.99 | 6.18 | 6.45 | 6.42 |
| TC0202001 | RBM43   | 375287 | RNA binding motif protein 43               | 0.000105 | 3 | 5.10 | 5.03 | 5.00 | 5.10 | 4.98 | 5.09 | 5.31 | 5.21 |
| TC1300476 | RCBTB2  | 1102   | regulator of chromosome condensator        | 6.10E-13 | 3 | 6.42 | 5.58 | 5.99 | 6.64 | 6.52 | 6.51 | 6.45 | 6.45 |
| TC1101549 | RELA    | 5970   | v-rel reticuloendotheliosis viral oncoge   | 1.44E-05 | 3 | 6.18 | 6.44 | 6.03 | 6.18 | 6.17 | 6.24 | 6.20 | 6.32 |
| TC0601529 | REV3L   | 5980   | REV3-like, catalytic subunit of DNA pol)   | 3.77E-11 | 3 | 4.72 | 4.12 | 4.18 | 4.37 | 4.30 | 4.47 | 4.61 | 4.55 |
| TC1200734 | RFC5    | 5985   | replication factor C (activator 1) 5, 36.5 | 5.73E-11 | 3 | 4.53 | 4.05 | 4.09 | 4.40 | 4.41 | 4.46 | 4.53 | 4.50 |
| TC0101373 | RGS1    | 5996   | regulator of G-protein signaling 1 /// R   | 8.22E-08 | 3 | 3.11 | 2.88 | 2.90 | 3.11 | 2.92 | 3.26 | 3.46 | 3.70 |
| TC0200080 | RHOB    | 388    | ras homolog gene family, member B          | 6.88E-09 | 3 | 7.74 | 7.74 | 7.56 | 7.59 | 7.77 | 8.12 | 7.88 | 8.14 |
| TC0500352 | RHOBTB3 | 22836  | Rho-related BTB domain containing 3        | 1.07E-12 | 3 | 4.02 | 3.62 | 3.80 | 4.11 | 4.00 | 4.26 | 4.42 | 4.52 |
| TC0200219 | RHOQ    | 23433  | ras homolog gene family, member Q          | 9.08E-14 | 3 | 6.59 | 5.77 | 5.94 | 6.59 | 6.25 | 6.63 | 6.73 | 6.79 |
| TC1700893 | RILP    | 83547  | Rab interacting lysosomal protein          | 6.01E-06 | 3 | 5.15 | 5.08 | 4.98 | 5.16 | 5.17 | 5.26 | 5.17 | 5.23 |
| TC0700600 | RINT1   | 60561  | RAD50 interactor 1                         | 5.76E-05 | 3 | 3.73 | 3.44 | 3.53 | 3.55 | 3.59 | 3.58 | 3.72 | 3.62 |
| TC0600024 | RIPK1   | 8737   | receptor (TNFRSF)-interacting serine-th    | 0.00097  | 3 | 6.72 | 6.75 | 6.57 | 6.73 | 6.58 | 6.75 | 6.88 | 6.89 |
| TC0800419 | RIPK2   | 8767   | receptor-interacting serine-threonine k    | 5.77E-11 | 3 | 6.03 | 5.53 | 5.56 | 5.73 | 5.44 | 5.89 | 6.21 | 6.59 |
| TC0601689 | RMND1   | 55005  | required for meiotic nuclear division 1    | 3.57E-07 | 3 | 4.07 | 3.96 | 4.01 | 4.21 | 4.22 | 4.14 | 4.37 | 4.23 |
| TC0200423 | RMND5A  | 64795  | required for meiotic nuclear division 5    | 1.09E-13 | 3 | 7.38 | 6.45 | 6.56 | 6.92 | 6.88 | 7.14 | 7.05 | 7.21 |
| TC0201691 | RNF103  | 7844   | ring finger protein 103                    | 1.18E-07 | 3 | 5.76 | 5.49 | 5.42 | 5.54 | 5.62 | 5.79 | 5.70 | 5.77 |
| TC2000361 | RNF114  | 55905  | ring finger protein 114                    | 4.20E-07 | 3 | 7.23 | 6.81 | 6.88 | 7.02 | 7.05 | 7.22 | 7.24 | 7.47 |
| TC1100640 | RNF121  | 55298  | ring finger protein 121                    | 8.73E-07 | 3 | 5.37 | 4.95 | 4.92 | 5.13 | 5.18 | 5.21 | 5.28 | 5.24 |
| TC0800863 | RNF122  | 79845  | ring finger protein 122                    | 4.52E-11 | 3 | 6.23 | 5.58 | 5.27 | 5.78 | 5.56 | 5.88 | 5.99 | 6.20 |
| TC1800131 | RNF125  | 54941  | ring finger protein 125                    | 7.15E-08 | 3 | 4.02 | 3.48 | 3.75 | 4.13 | 3.86 | 3.91 | 4.10 | 4.19 |
| TC0501558 | RNF130  | 55819  | ring finger protein 130                    | 4.75E-06 | 3 | 9.20 | 8.79 | 8.95 | 9.17 | 9.07 | 9.23 | 9.23 | 9.35 |
| TC0200020 | RNF144A | 9781   | ring finger protein 144A                   | 2.96E-13 | 3 | 4.77 | 4.67 | 4.47 | 4.76 | 4.81 | 5.01 | 5.19 | 5.12 |
| TC0900445 | RNF20   | 56254  | ring finger protein 20 /// E3 ubiquitin-p  | 3.21E-05 | 3 | 7.32 | 6.96 | 7.11 | 7.33 | 7.07 | 7.19 | 7.39 | 7.40 |
| TC0400029 | RNF4    | 650020 | // ring finger protein 4                   | 7.83E-06 | 3 | 8.04 | 7.65 | 7.60 | 7.80 | 7.76 | 7.88 | 7.91 | 7.90 |
| TC1800073 | RNMT    | 8731   | RNA (guanine-7-) methyltransferase         | 2.12E-05 | 3 | 3.94 | 3.79 | 3.78 | 3.97 | 4.00 | 4.11 | 4.20 | 4.16 |

|           |                |        |                                           |          |   |      |      |      |      |      |      |      |      |
|-----------|----------------|--------|-------------------------------------------|----------|---|------|------|------|------|------|------|------|------|
| TC0X00569 | RP6-213H19.1   | 51765  | serine/threonine protein kinase MST4      | 0.000526 | 3 | 6.08 | 6.01 | 5.93 | 6.15 | 6.26 | 6.28 | 6.16 | 6.26 |
| TC1700018 | RPA1 /// Q7Z4  | 6117   | replication protein A1, 70kDa /// MSTP    | 2.57E-08 | 3 | 4.51 | 4.33 | 4.22 | 4.41 | 4.65 | 4.62 | 4.67 | 4.59 |
| TC1201136 | RPAP3          | 79657  | RNA polymerase II associated protein 3    | 2.44E-18 | 3 | 7.02 | 5.78 | 5.83 | 6.41 | 6.27 | 6.61 | 6.94 | 7.04 |
| TC0200444 | RPIA           | 22934  | ribose 5-phosphate isomerase A (ribose    | 3.65E-06 | 3 | 4.40 | 4.27 | 4.12 | 4.36 | 4.56 | 4.64 | 4.64 | 4.42 |
| TC1300045 | RPL21          | 731567 | // ribosomal protein L21                  | 9.57E-05 | 3 | 5.20 | 5.12 | 5.10 | 5.23 | 5.32 | 5.29 | 5.39 | 5.27 |
| TC1900882 | RPL28          | 6158   | ribosomal protein L28                     | 7.48E-06 | 3 | 5.76 | 5.64 | 5.50 | 5.73 | 5.75 | 5.79 | 5.89 | 5.81 |
| TC1200423 | RPL41          | 6171   | ribosomal protein L41                     | 8.85E-08 | 3 | 8.01 | 7.73 | 7.82 | 7.98 | 8.02 | 8.18 | 8.19 | 8.16 |
| TC0301539 | RPN1           | 6184   | ribophorin I                              | 7.96E-05 | 3 | 8.30 | 7.86 | 8.11 | 8.30 | 8.21 | 8.24 | 8.22 | 8.26 |
| TC1900717 | RPS11 /// SNOI | 6205   | ribosomal protein S11 /// small nucleol   | 4.55E-10 | 3 | 9.75 | 9.55 | 9.52 | 9.88 | 9.82 | 9.90 | 9.97 | 9.87 |
| TC1000365 | RPS24          | 6229   | ribosomal protein S24                     | 0.000358 | 3 | 4.19 | 4.03 | 4.09 | 4.12 | 4.19 | 4.22 | 4.28 | 4.19 |
| TC0600051 | RREB1          | 6239   | ras responsive element binding protein    | 1.74E-07 | 3 | 5.31 | 5.05 | 5.01 | 5.32 | 5.26 | 5.23 | 5.32 | 5.22 |
| TC0801168 | RRM2B          | 50484  | ribonucleotide reductase M2 B (TP53 ir    | 1.91E-08 | 3 | 6.49 | 5.96 | 5.98 | 6.07 | 5.93 | 6.32 | 6.25 | 6.55 |
| TC1001196 | RRP12          | 23223  | ribosomal RNA processing 12 homolog       | 0.00055  | 3 | 5.79 | 5.45 | 5.60 | 5.73 | 5.78 | 5.78 | 5.61 | 5.61 |
| TC0200019 | RSAD2          | 91543  | radical S-adenosyl methionine domain      | 4.13E-11 | 3 | 6.33 | 5.40 | 4.64 | 5.08 | 4.85 | 6.43 | 7.15 | 7.99 |
| TC0700431 | RSBN1L         | 222194 | round spermatid basic protein 1-like      | 1.05E-15 | 3 | 7.34 | 6.38 | 6.52 | 6.91 | 6.78 | 7.03 | 7.17 | 7.25 |
| TC0300884 | RTP4           | 64108  | receptor (chemosensory) transporter p     | 0.000502 | 3 | 4.73 | 4.47 | 4.43 | 4.54 | 4.25 | 4.81 | 5.20 | 5.36 |
| TC1001023 | RUFY2          | 55680  | RUN and FYVE domain containing 2 ///      | 0.000278 | 3 | 4.19 | 4.16 | 4.17 | 4.30 | 4.15 | 4.28 | 4.42 | 4.32 |
| TC1700481 | RUNDC1         | 146923 | RUN domain containing 1                   | 0.000164 | 3 | 5.74 | 5.38 | 5.42 | 5.60 | 5.50 | 5.66 | 5.70 | 5.79 |
| TC0600428 | RUNX2          | 860    | runt-related transcription factor 2 /// R | 1.86E-14 | 3 | 5.41 | 4.83 | 4.70 | 5.05 | 5.04 | 5.21 | 5.24 | 5.36 |
| TC0500285 | S100Z          | 170591 | S100 calcium binding protein Z            | 4.99E-06 | 3 | 4.48 | 3.96 | 4.10 | 4.37 | 4.12 | 4.26 | 4.43 | 4.39 |
| TC0701417 | SAMD9          | 54809  | sterile alpha motif domain containing 9   | 2.89E-09 | 3 | 8.01 | 7.38 | 7.36 | 7.37 | 7.08 | 7.63 | 8.01 | 8.13 |
| TC0701418 | SAMD9L         | 219285 | sterile alpha motif domain containing 9   | 1.28E-05 | 3 | 7.67 | 7.29 | 7.21 | 7.12 | 6.84 | 7.48 | 7.90 | 8.06 |
| TC2000720 | SAMHD1         | 25939  | SAM domain and HD domain 1 /// SAM        | 8.75E-06 | 3 | 7.00 | 7.01 | 6.67 | 6.96 | 6.57 | 7.25 | 7.66 | 7.79 |
| TC1201536 | SART3          | 9733   | squamous cell carcinoma antigen recog     | 2.41E-05 | 3 | 5.84 | 5.69 | 5.50 | 5.67 | 5.68 | 5.79 | 5.92 | 5.88 |
| TC0102481 | SASS6          | 163786 | spindle assembly 6 homolog (C. elegan:    | 2.79E-09 | 3 | 3.97 | 3.86 | 3.84 | 4.10 | 4.24 | 4.35 | 4.55 | 4.41 |
| TC0701284 | SBDS           | 51119  | Shwachman-Bodian-Diamond syndrom          | 4.25E-05 | 3 | 5.46 | 5.50 | 5.41 | 5.64 | 5.64 | 5.74 | 5.91 | 5.86 |
| TC0401250 | SCLT1          | 132320 | sodium channel and clathrin linker 1      | 2.01E-06 | 3 | 7.85 | 7.35 | 7.65 | 7.79 | 7.56 | 7.85 | 7.94 | 7.93 |
| TC0601503 | SCML4          | 256380 | sex comb on midleg-like 4 (Drosophila)    | 1.09E-08 | 3 | 4.43 | 3.97 | 4.05 | 4.11 | 4.02 | 4.38 | 4.51 | 4.53 |
| TC0101029 | SCNM1          | 79005  | sodium channel modifier 1 /// Sodium      | 4.41E-05 | 3 | 7.36 | 7.06 | 7.19 | 7.28 | 7.28 | 7.37 | 7.31 | 7.40 |
| TC1701032 | SCO1           | 6341   | SCO cytochrome oxidase deficient hom      | 3.68E-07 | 3 | 4.52 | 4.35 | 4.36 | 4.62 | 4.60 | 4.65 | 4.71 | 4.69 |
| TC0701103 | SCRN1          | 9805   | secernin 1                                | 2.97E-12 | 3 | 4.42 | 4.34 | 4.32 | 4.54 | 4.51 | 4.61 | 4.80 | 4.85 |
| TC0200870 | SCRN3          | 79634  | secernin 3                                | 1.40E-11 | 3 | 5.44 | 4.84 | 4.96 | 5.14 | 5.07 | 5.23 | 5.33 | 5.30 |
| TC2000308 | SEMG1          | 6406   | semenogelin I                             | 6.89E-07 | 3 | 2.85 | 2.44 | 2.46 | 2.67 | 2.47 | 2.74 | 3.07 | 3.02 |
| TC0300941 | SENP5          | 205564 | SUMO1/sentrin specific peptidase 5        | 0.000328 | 3 | 4.84 | 4.64 | 4.56 | 4.70 | 4.61 | 4.74 | 4.86 | 4.85 |

|           |              |                                                    |          |   |      |      |      |      |      |      |      |      |
|-----------|--------------|----------------------------------------------------|----------|---|------|------|------|------|------|------|------|------|
| TC0400859 | SEPSECS      | 51091 Sep (O-phosphoserine) tRNA:Sec (selen        | 7.99E-05 | 3 | 3.93 | 3.64 | 3.66 | 3.82 | 3.79 | 3.81 | 3.81 | 3.88 |
| TC0400335 | SEPT11       | 55752 septin 11                                    | 1.52E-12 | 3 | 4.40 | 4.13 | 4.10 | 4.73 | 4.70 | 5.00 | 5.09 | 5.05 |
| TC1100393 | SERPING1     | 710 serpin peptidase inhibitor, clade G (C1        | 9.90E-09 | 3 | 6.68 | 6.40 | 5.73 | 6.14 | 5.95 | 6.99 | 7.37 | 7.78 |
| TC1101752 | SESN3        | 143686 sestrin 3                                   | 3.97E-08 | 3 | 5.40 | 4.69 | 4.71 | 4.96 | 4.96 | 5.21 | 5.26 | 5.23 |
| TC0900603 | SET          | 6418 SET nuclear oncogene /// Protein SET (l       | 4.35E-23 | 3 | 6.99 | 6.55 | 6.45 | 6.86 | 7.08 | 7.25 | 7.35 | 7.36 |
| TC0102135 | SF3A3        | 10946 splicing factor 3a, subunit 3, 60kDa         | 3.13E-12 | 3 | 6.20 | 4.94 | 4.93 | 5.41 | 5.63 | 5.59 | 5.90 | 5.48 |
| TC1000751 | SFMBT2       | 57713 Scm-like with four mbt domains 2 /// S       | 2.33E-08 | 3 | 4.15 | 3.74 | 3.73 | 3.97 | 3.85 | 4.01 | 4.22 | 4.24 |
| TC2100296 | SFRS15       | 57466 splicing factor, arginine/serine-rich 15     | 3.39E-07 | 3 | 5.66 | 5.62 | 5.54 | 5.68 | 5.66 | 5.75 | 5.89 | 5.82 |
| TC1201127 | SFRS2IP      | 9169 splicing factor, arginine/serine-rich 2, ir   | 4.73E-05 | 3 | 7.00 | 6.69 | 6.65 | 6.73 | 6.58 | 6.78 | 7.02 | 6.98 |
| TC2000283 | SFRS6        | 6431 splicing factor, arginine/serine-rich 6 //    | 4.24E-05 | 3 | 6.29 | 5.96 | 5.89 | 5.99 | 6.25 | 6.25 | 6.23 | 6.11 |
| TC0201443 | SFRS7        | 6432 splicing factor, arginine/serine-rich 7, 3    | 0.000181 | 3 | 6.03 | 5.63 | 5.43 | 5.71 | 5.97 | 6.12 | 6.19 | 5.90 |
| TC0200670 | SFT2D3       | 84826 SFT2 domain containing 3                     | 3.39E-06 | 3 | 5.53 | 5.31 | 5.47 | 5.51 | 5.61 | 5.80 | 5.96 | 5.70 |
| TC0601619 | SGK1 /// SGK | 6446 serum/glucocorticoid regulated kinase         | 2.91E-18 | 3 | 7.35 | 5.57 | 5.37 | 6.13 | 5.98 | 6.69 | 6.67 | 7.10 |
| TC1000980 | SGMS1        | 259230 sphingomyelin synthase 1                    | 1.72E-05 | 3 | 5.79 | 5.88 | 5.50 | 5.70 | 5.71 | 5.95 | 5.91 | 6.11 |
| TC1901743 | SIGLEC10     | 89790 sialic acid binding Ig-like lectin 10 /// Si | 1.69E-15 | 3 | 7.83 | 6.00 | 6.22 | 7.42 | 7.07 | 7.05 | 7.31 | 7.44 |
| TC1901744 | SIGLEC8      | 27181 sialic acid binding Ig-like lectin 8 /// Sia | 5.17E-11 | 3 | 4.65 | 3.91 | 4.01 | 4.42 | 4.24 | 4.43 | 4.61 | 4.77 |
| TC1000286 | SIRT1        | 23411 sirtuin (silent mating type information      | 8.64E-06 | 3 | 6.76 | 6.38 | 6.49 | 6.64 | 6.60 | 6.77 | 6.81 | 6.92 |
| TC0500122 | SKP2         | 6502 S-phase kinase-associated protein 2 (p4       | 2.30E-10 | 3 | 4.56 | 4.12 | 4.31 | 4.69 | 4.84 | 4.82 | 5.02 | 4.77 |
| TC0102921 | SLAMF6       | 114836 SLAM family member 6 /// SLAM famil         | 8.89E-15 | 3 | 4.94 | 3.62 | 3.66 | 4.54 | 4.03 | 4.49 | 5.12 | 5.10 |
| TC0400765 | SLBP         | 7884 stem-loop binding protein                     | 2.00E-13 | 3 | 6.77 | 6.27 | 6.25 | 6.56 | 6.76 | 6.81 | 6.80 | 6.85 |
| TC1201684 | SLC15A4      | 121260 solute carrier family 15, member 4 /// s    | 1.66E-05 | 3 | 8.24 | 7.63 | 7.78 | 8.03 | 7.90 | 8.09 | 8.12 | 8.10 |
| TC0300667 | SLC25A36     | 55186 solute carrier family 25, member 36          | 2.54E-07 | 3 | 3.92 | 3.84 | 3.84 | 4.00 | 4.09 | 4.22 | 4.41 | 4.24 |
| TC0300172 | SLC25A38     | 54977 solute carrier family 25, member 38          | 5.68E-07 | 3 | 3.58 | 3.35 | 3.27 | 3.47 | 3.59 | 3.59 | 3.80 | 3.69 |
| TC0101088 | SLC27A3      | 11000 solute carrier family 27 (fatty acid trans   | 8.12E-10 | 3 | 5.08 | 4.63 | 4.72 | 4.83 | 4.86 | 4.87 | 4.99 | 4.96 |
| TC0600423 | SLC29A1      | 2030 solute carrier family 29 (nucleoside tra      | 2.07E-12 | 3 | 5.36 | 4.95 | 5.05 | 5.37 | 5.25 | 5.45 | 5.47 | 5.50 |
| TC0500231 | SLC30A5      | 64924 solute carrier family 30 (zinc transport     | 3.28E-07 | 3 | 4.59 | 4.53 | 4.50 | 4.58 | 4.57 | 4.68 | 4.82 | 4.75 |
| TC1200501 | SLC35E3      | 55508 solute carrier family 35, member E3 ///      | 3.32E-11 | 3 | 5.85 | 5.23 | 5.26 | 5.54 | 5.52 | 5.52 | 5.68 | 5.70 |
| TC1201128 | SLC38A1      | 81539 solute carrier family 38, member 1 /// s     | 1.85E-18 | 3 | 5.04 | 4.63 | 4.50 | 5.14 | 5.30 | 5.42 | 5.69 | 5.47 |
| TC1800422 | SLC39A6      | 25800 solute carrier family 39 (zinc transport     | 5.75E-16 | 3 | 5.59 | 5.10 | 5.12 | 5.57 | 5.50 | 5.65 | 5.80 | 5.80 |
| TC1601195 | SLC7A6OS     | 84138 solute carrier family 7, member 6 oppo       | 3.00E-12 | 3 | 5.92 | 5.20 | 5.50 | 5.73 | 5.53 | 5.66 | 5.93 | 5.90 |
| TC1400716 | SLC7A8       | 23428 solute carrier family 7 (cationic amino s    | 2.85E-08 | 3 | 4.32 | 4.10 | 4.10 | 4.33 | 4.22 | 4.37 | 4.52 | 4.60 |
| TC1701237 | SLFN13       | 146857 schlafen family member 13 /// Schlafer      | 2.25E-10 | 3 | 4.15 | 3.66 | 3.67 | 4.21 | 4.44 | 4.47 | 4.60 | 4.32 |
| TC0501465 | SLU7         | 10569 SLU7 splicing factor homolog (S. cerevis     | 8.54E-05 | 3 | 8.50 | 8.42 | 8.26 | 8.35 | 8.26 | 8.42 | 8.56 | 8.59 |
| TC1500424 | SMAD3        | 4088 SMAD family member 3                          | 2.13E-08 | 3 | 5.41 | 5.17 | 5.08 | 5.44 | 5.31 | 5.46 | 5.61 | 5.61 |

|           |                |                                                     |          |   |      |      |      |      |      |      |      |      |
|-----------|----------------|-----------------------------------------------------|----------|---|------|------|------|------|------|------|------|------|
| TC0400567 | SMARCA5        | 8467 SWI/SNF related, matrix associated, act        | 1.96E-07 | 3 | 6.77 | 6.76 | 6.63 | 6.81 | 6.68 | 6.94 | 7.12 | 7.11 |
| TC0301170 | SMARCC1        | 6599 SWI/SNF related, matrix associated, act        | 1.53E-06 | 3 | 7.59 | 7.29 | 7.27 | 7.31 | 7.24 | 7.40 | 7.55 | 7.52 |
| TC0300755 | SMC4           | 10051 structural maintenance of chromosom           | 1.62E-07 | 3 | 5.77 | 5.52 | 5.37 | 5.50 | 5.74 | 5.88 | 6.09 | 5.93 |
| TC0201331 | SMC6           | 79677 structural maintenance of chromosom           | 2.49E-05 | 3 | 4.95 | 4.63 | 4.80 | 5.14 | 5.05 | 5.10 | 5.44 | 5.12 |
| TC1401068 | SMEK1          | 55671 SMEK homolog 1, suppressor of mek1 (          | 0.000683 | 3 | 6.70 | 6.41 | 6.46 | 6.45 | 6.36 | 6.59 | 6.75 | 6.69 |
| TC1001275 | SMNDC1         | 10285 survival motor neuron domain containi         | 1.15E-05 | 3 | 6.67 | 6.67 | 6.71 | 6.75 | 6.74 | 6.90 | 6.89 | 6.93 |
| TC1601198 | SMPD3          | 55512 sphingomyelin phosphodiesterase 3, n          | 1.55E-08 | 3 | 4.94 | 4.55 | 4.58 | 4.84 | 4.74 | 4.92 | 5.03 | 5.03 |
| TC0201902 | SMPD4          | 55627 sphingomyelin phosphodiesterase 4, n          | 4.27E-05 | 3 | 4.47 | 4.38 | 4.39 | 4.47 | 4.52 | 4.53 | 4.58 | 4.51 |
| TC0X00084 | SMS            | 6611 spermine synthase /// Spermine synth           | 7.65E-23 | 3 | 7.18 | 6.10 | 5.72 | 6.77 | 6.88 | 7.34 | 7.43 | 7.54 |
| TC0101511 | SMYD2          | 56950 SET and MYND domain containing 2              | 3.31E-05 | 3 | 3.60 | 3.51 | 3.54 | 3.61 | 3.75 | 3.84 | 3.81 | 3.81 |
| TC1501054 | SNAPC5         | 10302 small nuclear RNA activating complex, j       | 5.18E-07 | 3 | 5.16 | 5.10 | 5.07 | 5.21 | 5.19 | 5.30 | 5.54 | 5.49 |
| TC0900671 | SNORD36B ///   | 650992 // ribosomal protein L7a /// small nucleol   | 5.02E-07 | 3 | 4.16 | 4.00 | 3.98 | 4.07 | 4.15 | 4.13 | 4.30 | 4.14 |
| TC1101746 | SNORD6         | --- small nucleolar RNA, C/D box 6 (SNORE           | 2.26E-09 | 3 | 6.10 | 5.09 | 5.06 | 5.26 | 5.52 | 5.80 | 5.79 | 5.78 |
| TC0300203 | SNRK           | 54861 SNF related kinase                            | 1.74E-07 | 3 | 7.71 | 7.34 | 7.26 | 7.31 | 7.29 | 7.55 | 7.47 | 7.69 |
| TC0900491 | SNX30          | 401548 sorting nexin family member 30 /// Sor       | 1.18E-09 | 3 | 5.32 | 4.87 | 4.84 | 5.04 | 4.98 | 5.09 | 5.17 | 5.20 |
| TC1500302 | SORD           | 6652 sorbitol dehydrogenase                         | 4.94E-11 | 3 | 5.93 | 5.63 | 5.63 | 5.96 | 5.78 | 6.09 | 6.24 | 6.30 |
| TC0202379 | SP110          | 3431 SP110 nuclear body protein /// Sp110 r         | 1.03E-09 | 3 | 9.44 | 9.06 | 9.01 | 8.93 | 8.72 | 9.16 | 9.36 | 9.44 |
| TC0201158 | SP140          | 11262 SP140 nuclear body protein /// Nuclea         | 1.68E-11 | 3 | 7.22 | 7.16 | 6.22 | 6.37 | 6.22 | 6.99 | 7.36 | 7.65 |
| TC0800465 | SPAG1          | 6674 sperm associated antigen 1                     | 2.63E-05 | 3 | 3.76 | 3.63 | 3.43 | 3.76 | 3.95 | 3.87 | 3.99 | 3.93 |
| TC0200155 | SPAST          | 6683 spastin                                        | 0.000472 | 3 | 7.60 | 7.57 | 7.78 | 7.75 | 7.62 | 7.80 | 7.84 | 7.92 |
| TC0102239 | SPATA6         | 54558 spermatogenesis associated 6 /// Sperr        | 2.37E-05 | 3 | 4.69 | 4.15 | 4.37 | 4.48 | 4.13 | 4.30 | 4.55 | 4.71 |
| TC1700229 | SPECC1         | 92521 sperm antigen with calponin homology          | 3.04E-17 | 3 | 5.94 | 5.17 | 5.00 | 5.33 | 5.15 | 5.36 | 5.60 | 5.78 |
| TC1701507 | SPOP           | 8405 speckle-type POZ protein                       | 2.77E-08 | 3 | 7.29 | 6.88 | 6.98 | 7.16 | 7.00 | 7.22 | 7.25 | 7.39 |
| TC0500777 | SQSTM1         | 8878 sequestosome 1                                 | 9.30E-11 | 3 | 6.20 | 5.73 | 5.61 | 5.98 | 5.97 | 6.11 | 6.13 | 6.23 |
| TC0300986 | SRGAP3         | 9901 SLIT-ROBO Rho GTPase activating prote          | 1.20E-07 | 3 | 3.81 | 3.61 | 3.66 | 3.77 | 3.66 | 3.81 | 3.87 | 3.92 |
| TC0100267 | SRRM1          | 10250 serine/arginine repetitive matrix 1 /// S     | 9.89E-07 | 3 | 7.39 | 7.07 | 6.98 | 7.08 | 7.03 | 7.16 | 7.39 | 7.35 |
| TC2000486 | SRXN1 /// SCR1 | 140809 // sulfiredoxin 1 homolog (S. cerevisiae) /, | 4.23E-06 | 3 | 5.27 | 4.97 | 5.15 | 5.30 | 5.29 | 5.39 | 5.33 | 5.32 |
| TC0300194 | SS18L2         | 51188 synovial sarcoma translocation gene or        | 1.53E-11 | 3 | 6.36 | 6.02 | 6.30 | 6.55 | 6.50 | 6.65 | 6.77 | 6.83 |
| TC0501116 | SSBP2          | 23635 single-stranded DNA binding protein 2         | 1.91E-22 | 3 | 5.75 | 4.70 | 4.40 | 4.98 | 4.92 | 5.24 | 5.33 | 5.58 |
| TC0102279 | SSBP3          | 23648 single stranded DNA binding protein 3 ,       | 1.60E-09 | 3 | 5.28 | 5.19 | 5.15 | 5.30 | 5.32 | 5.38 | 5.46 | 5.49 |
| TC1200206 | SSPN           | 8082 sarcospan (Kras oncogene-associated g          | 6.39E-13 | 3 | 4.10 | 3.80 | 3.79 | 3.71 | 3.65 | 4.12 | 4.17 | 4.37 |
| TC2200689 | ST13           | 731047 // suppression of tumorigenicity 13 (color   | 9.01E-08 | 3 | 8.14 | 7.98 | 7.81 | 8.22 | 8.32 | 8.44 | 8.65 | 8.41 |
| TC0801265 | ST3GAL1        | 6482 ST3 beta-galactoside alpha-2,3-sialyltra       | 2.83E-10 | 3 | 5.85 | 5.80 | 5.34 | 5.72 | 5.65 | 5.89 | 5.90 | 5.88 |
| TC0300436 | ST3GAL6        | 10402 ST3 beta-galactoside alpha-2,3-sialyltra      | 6.83E-18 | 3 | 6.59 | 5.47 | 6.26 | 6.33 | 6.22 | 6.61 | 6.65 | 6.80 |

|           |                |           |                                             |          |   |      |      |      |      |      |      |      |       |
|-----------|----------------|-----------|---------------------------------------------|----------|---|------|------|------|------|------|------|------|-------|
| TC0501182 | ST8SIA4        | 7903      | ST8 alpha-N-acetyl-neuraminide alpha-       | 7.78E-09 | 3 | 9.21 | 8.69 | 8.87 | 8.82 | 8.60 | 9.07 | 9.01 | 9.20  |
| TC0202007 | STAM2          | 10254     | signal transducing adaptor molecule (S      | 0.000959 | 3 | 7.50 | 7.46 | 7.52 | 7.47 | 7.28 | 7.57 | 7.61 | 7.67  |
| TC0200348 | STAMBP         | 10617     | STAM binding protein                        | 4.84E-05 | 3 | 5.64 | 5.40 | 5.41 | 5.53 | 5.52 | 5.65 | 5.72 | 5.71  |
| TC0400267 | STAP1          | 26228     | signal transducing adaptor family mem       | 4.78E-09 | 3 | 3.24 | 3.13 | 3.34 | 3.55 | 3.28 | 3.66 | 4.11 | 4.12  |
| TC1501165 | STARD5         | 80765     | StAR-related lipid transfer (START) dom     | 8.83E-14 | 3 | 5.67 | 5.00 | 5.08 | 5.29 | 5.37 | 5.38 | 5.47 | 5.41  |
| TC0202181 | STAT1          | 6772      | signal transducer and activator of trans    | 2.07E-09 | 3 | 8.54 | 8.17 | 7.74 | 8.07 | 7.83 | 8.54 | 8.67 | 9.02  |
| TC0400146 | STIM2          | 57620     | stromal interaction molecule 2 /// Stro     | 3.71E-05 | 3 | 5.70 | 5.72 | 5.60 | 5.51 | 5.22 | 5.48 | 5.82 | 5.80  |
| TC0900890 | STOML2         | 30968     | stomatin (EPB72)-like 2                     | 0.000798 | 3 | 4.74 | 4.70 | 4.60 | 4.69 | 4.83 | 4.79 | 4.86 | 4.72  |
| TC1901222 | STX10          | 8677      | syntaxin 10 /// Syntaxin-10 (Syn10). [Sc    | 2.66E-06 | 3 | 6.90 | 6.40 | 6.56 | 6.91 | 6.85 | 6.77 | 6.73 | 6.72  |
| TC0900436 | STX17          | 55014     | syntaxin 17                                 | 0.000159 | 3 | 4.52 | 4.90 | 4.57 | 4.68 | 4.55 | 4.79 | 4.93 | 5.03  |
| TC1200738 | SUDS3          | 64426     | suppressor of defective silencing 3 horr    | 0.000246 | 3 | 5.86 | 5.71 | 5.50 | 5.73 | 5.72 | 5.88 | 5.92 | 5.83  |
| TC1400685 | SUPT16H        | 11198     | suppressor of Ty 16 homolog (S. cerevis     | 2.86E-13 | 3 | 5.86 | 5.42 | 5.42 | 5.86 | 5.85 | 5.99 | 6.20 | 6.06  |
| TC1900522 | SUPT5H         | 6829      | suppressor of Ty 5 homolog (S. cerevisi     | 0.000182 | 3 | 6.10 | 5.96 | 5.85 | 6.01 | 5.98 | 6.02 | 6.10 | 6.14  |
| TC1000302 | SUPV3L1        | 6832      | suppressor of var1, 3-like 1 (S. cerevisia  | 0.000174 | 3 | 3.89 | 3.74 | 3.74 | 3.83 | 3.92 | 3.85 | 3.99 | 3.93  |
| TC1700349 | SUZ12          | 23512     | suppressor of zeste 12 homolog (Droso       | 1.26E-11 | 3 | 7.10 | 7.07 | 6.97 | 7.18 | 7.28 | 7.46 | 7.53 | 7.46  |
| TC0101999 | SYF2           | 25949     | SYF2 homolog, RNA splicing factor (S. c     | 0.000106 | 3 | 9.80 | 9.81 | 9.76 | 9.85 | 9.77 | 9.93 | 9.94 | 10.02 |
| TC1700377 | TAF15          | 8148      | TAF15 RNA polymerase II, TATA box bir       | 1.49E-07 | 3 | 7.80 | 7.55 | 7.25 | 7.62 | 7.62 | 7.71 | 7.97 | 7.84  |
| TC1000045 | TAF3           | 83860     | TAF3 RNA polymerase II, TATA box binc       | 4.97E-09 | 3 | 5.47 | 5.23 | 5.15 | 5.29 | 5.35 | 5.43 | 5.63 | 5.47  |
| TC1000555 | TAF5           | 6877      | TAF5 RNA polymerase II, TATA box binc       | 1.13E-09 | 3 | 4.11 | 3.90 | 3.90 | 4.17 | 4.21 | 4.28 | 4.39 | 4.37  |
| TC0601721 | TAGAP          | 117289    | T-cell activation RhoGTPase activating p    | 1.02E-16 | 3 | 8.47 | 7.52 | 7.31 | 7.74 | 7.75 | 8.33 | 8.27 | 8.65  |
| TC0601165 | TAP1           | 6890      | transporter 1, ATP-binding cassette, su     | 1.68E-09 | 3 | 7.64 | 6.79 | 6.63 | 6.95 | 6.94 | 7.41 | 7.39 | 7.45  |
| TC0601163 | TAP2           | 6891      | transporter 2, ATP-binding cassette, su     | 1.86E-10 | 3 | 6.62 | 5.76 | 5.68 | 5.94 | 5.75 | 6.18 | 6.27 | 6.42  |
| TC1200052 | TAPBPL /// CD2 | 55080 /// | TAP binding protein-like /// CD27 mole      | 1.15E-15 | 3 | 5.88 | 5.32 | 5.31 | 5.46 | 5.42 | 5.59 | 5.66 | 5.77  |
| TC0103361 | TARBP1         | 6894      | TAR (HIV-1) RNA binding protein 1           | 0.000528 | 3 | 3.00 | 3.01 | 2.99 | 3.03 | 3.04 | 3.05 | 3.20 | 3.13  |
| TC0101506 | TATDN3         | 128387    | TatD DNase domain containing 3              | 1.28E-11 | 3 | 6.49 | 5.65 | 5.81 | 6.24 | 6.07 | 6.39 | 6.66 | 6.69  |
| TC0400162 | TBC1D1         | 23216     | TBC1 (tre-2/USP6, BUB2, cdc16) domai        | 4.14E-10 | 3 | 7.72 | 7.01 | 6.98 | 7.30 | 7.13 | 7.35 | 7.44 | 7.53  |
| TC0600890 | TBP            | 6908      | TATA box binding protein                    | 4.36E-06 | 3 | 6.03 | 5.53 | 5.52 | 5.72 | 5.73 | 5.82 | 5.93 | 5.87  |
| TC2000892 | TCFL5          | 10732     | transcription factor-like 5 (basic helix-lc | 0.00039  | 3 | 4.57 | 4.30 | 4.35 | 4.62 | 4.57 | 4.60 | 4.58 | 4.61  |
| TC0400929 | TEC            | 7006      | tec protein tyrosine kinase                 | 2.72E-11 | 3 | 4.91 | 4.53 | 4.54 | 5.03 | 5.02 | 5.15 | 5.39 | 5.28  |
| TC1601206 | TERF2          | 7014      | telomeric repeat binding factor 2           | 3.87E-06 | 3 | 5.57 | 5.44 | 5.37 | 5.57 | 5.48 | 5.63 | 5.75 | 5.72  |
| TC1000264 | TFAM           | 7019      | transcription factor A, mitochondrial //    | 5.08E-10 | 3 | 5.34 | 5.03 | 5.07 | 5.53 | 5.59 | 5.71 | 5.84 | 5.66  |
| TC0800310 | TGS1           | 96764     | trimethylguanosine synthase homolog         | 3.97E-05 | 3 | 5.63 | 5.60 | 5.58 | 5.75 | 5.66 | 5.88 | 6.12 | 6.01  |
| TC2000414 | TH1L           | 51497     | TH1-like (Drosophila)                       | 7.88E-14 | 3 | 5.73 | 5.04 | 5.06 | 5.36 | 5.37 | 5.45 | 5.57 | 5.46  |
| TC0201469 | THADA          | 63892     | thyroid adenoma associated /// thyroic      | 9.46E-12 | 3 | 4.38 | 4.08 | 3.97 | 4.10 | 4.13 | 4.20 | 4.31 | 4.27  |

|            |              |                                                |          |   |       |      |      |      |      |       |       |       |
|------------|--------------|------------------------------------------------|----------|---|-------|------|------|------|------|-------|-------|-------|
| TC1600529  | THAP11       | 57215 THAP domain containing 11                | 8.76E-09 | 3 | 4.71  | 4.27 | 4.62 | 4.96 | 4.90 | 4.86  | 5.00  | 4.93  |
| TC0400324  | THAP6        | 152815 THAP domain containing 6 /// THAP do    | 8.12E-08 | 3 | 4.74  | 4.39 | 4.46 | 4.43 | 4.40 | 4.55  | 4.64  | 4.70  |
| TC0500305  | THBS4        | 7060 thrombospondin 4                          | 1.00E-06 | 3 | 4.07  | 3.93 | 3.93 | 4.09 | 4.01 | 4.14  | 4.16  | 4.19  |
| TC1700427  | THRA         | 7067 thyroid hormone receptor, alpha (eryth    | 2.01E-06 | 3 | 5.49  | 5.17 | 5.07 | 5.34 | 5.42 | 5.45  | 5.47  | 5.46  |
| TC1600923  | THUMPD1      | 55623 THUMP domain containing 1                | 3.79E-07 | 3 | 4.67  | 4.51 | 4.61 | 4.84 | 4.76 | 4.83  | 5.07  | 4.96  |
| TC1100540  | TIGD3        | 220359 tigger transposable element derived 3   | 4.76E-11 | 3 | 7.19  | 6.21 | 5.98 | 6.36 | 6.40 | 6.75  | 6.66  | 6.87  |
| TC1600795  | TIGD7        | 91151 tigger transposable element derived 7    | 1.48E-05 | 3 | 4.53  | 4.25 | 4.20 | 4.20 | 4.11 | 4.41  | 4.50  | 4.48  |
| TC1101414  | TIMM10       | 26519 translocase of inner mitochondrial mer   | 2.50E-09 | 3 | 6.09  | 5.42 | 5.29 | 5.96 | 6.32 | 6.46  | 6.45  | 6.10  |
| TC1000972  | TIMM23       | 10431 translocase of inner mitochondrial mer   | 9.88E-10 | 3 | 5.56  | 5.10 | 5.25 | 5.47 | 5.51 | 5.50  | 5.60  | 5.48  |
| TC0X00698  | TKTL1        | 8277 transketolase-like 1 /// Transketolase-li | 0.000257 | 3 | 4.01  | 3.89 | 3.85 | 4.11 | 3.95 | 4.09  | 4.16  | 4.22  |
| TC0400882  | TLR10        | 81793 toll-like receptor 10                    | 8.26E-07 | 3 | 5.12  | 3.96 | 4.39 | 4.88 | 4.65 | 4.73  | 4.75  | 4.60  |
| TC17r00016 | TMEM106A     | 113277 transmembrane protein 106A              | 4.74E-05 | 3 | 5.50  | 5.24 | 5.21 | 5.27 | 5.29 | 5.41  | 5.40  | 5.39  |
| TC1101769  | TMEM123      | 114908 transmembrane protein 123 /// Porimi    | 6.16E-10 | 3 | 7.53  | 7.62 | 7.25 | 7.40 | 7.57 | 7.97  | 8.10  | 8.19  |
| TC1100455  | TMEM138      | 51524 transmembrane protein 138                | 2.48E-05 | 3 | 4.21  | 4.05 | 4.05 | 4.31 | 4.37 | 4.26  | 4.27  | 4.28  |
| TC0700724  | TMEM140      | 55281 transmembrane protein 140                | 2.68E-09 | 3 | 8.91  | 8.18 | 7.82 | 8.31 | 8.15 | 8.59  | 8.63  | 8.85  |
| TC0600460  | TMEM14A      | 28978 transmembrane protein 14A                | 3.02E-07 | 3 | 3.91  | 3.85 | 3.82 | 4.03 | 4.05 | 4.12  | 4.24  | 4.23  |
| TC0401327  | TMEM154      | 201799 transmembrane protein 154 /// Transn    | 1.90E-13 | 3 | 10.02 | 9.48 | 9.40 | 9.61 | 9.56 | 9.87  | 9.85  | 10.05 |
| TC0400885  | TMEM156      | 80008 transmembrane protein 156                | 6.91E-08 | 3 | 2.75  | 2.52 | 2.67 | 2.78 | 2.65 | 2.87  | 3.18  | 3.25  |
| TC0X00494  | TMEM164      | 84187 transmembrane protein 164 /// Transn     | 2.54E-07 | 3 | 6.53  | 6.13 | 6.16 | 6.48 | 6.42 | 6.61  | 6.69  | 6.84  |
| TC0600849  | TMEM181      | 57583 transmembrane protein 181 /// Transn     | 7.59E-05 | 3 | 4.41  | 4.17 | 4.28 | 4.45 | 4.35 | 4.39  | 4.46  | 4.40  |
| TC2200661  | TMEM184B     | 25829 transmembrane protein 184B               | 6.18E-05 | 3 | 6.37  | 6.47 | 5.86 | 6.24 | 6.33 | 6.54  | 6.31  | 6.49  |
| TC1201314  | TMEM194A /// | 23306 transmembrane protein 194A /// Unch      | 9.24E-08 | 3 | 4.19  | 3.65 | 3.56 | 3.76 | 3.93 | 4.01  | 3.97  | 4.01  |
| TC0102054  | TMEM200B     | 399474 transmembrane protein 200B              | 3.28E-05 | 3 | 5.70  | 5.42 | 5.35 | 5.47 | 5.51 | 5.54  | 5.50  | 5.66  |
| TC2100312  | TMEM50B      | 757 transmembrane protein 50B                  | 6.63E-11 | 3 | 6.58  | 6.18 | 6.23 | 6.46 | 6.59 | 6.61  | 6.60  | 6.53  |
| TC0800841  | TMEM66       | 51669 transmembrane protein 66                 | 1.58E-06 | 3 | 8.82  | 8.59 | 8.43 | 8.55 | 8.48 | 8.70  | 8.70  | 8.86  |
| TC0100500  | TMEM69       | 51249 transmembrane protein 69 /// Transmκ     | 1.52E-06 | 3 | 5.12  | 5.00 | 5.16 | 5.30 | 5.25 | 5.29  | 5.51  | 5.41  |
| TC0103158  | TMEM81       | 388730 transmembrane protein 81                | 0.000472 | 3 | 4.10  | 3.68 | 3.83 | 4.09 | 4.00 | 4.07  | 4.07  | 4.13  |
| TC1500338  | TMOD2        | 29767 tropomodulin 2 (neuronal)                | 1.25E-16 | 3 | 6.65  | 5.26 | 5.28 | 5.73 | 5.39 | 5.86  | 6.16  | 6.39  |
| TC0Y00053  | TMSB4Y       | 9087 thymosin beta 4, Y-linked                 | 0.00084  | 3 | 3.96  | 3.70 | 3.59 | 3.82 | 3.82 | 4.13  | 4.00  | 3.96  |
| TC0301755  | TNFSF10      | 8743 tumor necrosis factor (ligand) superfar   | 3.80E-05 | 3 | 10.02 | 9.75 | 9.86 | 9.95 | 9.73 | 10.06 | 10.17 | 10.23 |
| TC0301750  | TNIK         | 23043 TRAF2 and NCK interacting kinase /// T   | 2.16E-18 | 3 | 5.22  | 4.51 | 4.38 | 5.33 | 5.07 | 5.38  | 5.83  | 5.74  |
| TC2000765  | TOMM34       | 10953 translocase of outer mitochondrial mer   | 2.46E-08 | 3 | 4.57  | 4.23 | 4.27 | 4.53 | 4.64 | 4.61  | 4.72  | 4.57  |
| TC2000269  | TOP1         | 7150 topoisomerase (DNA) I                     | 4.78E-06 | 3 | 7.83  | 7.92 | 7.65 | 7.65 | 7.49 | 7.79  | 7.96  | 7.98  |
| TC2000290  | TOX2         | 84969 TOX high mobility group box family me    | 0.000387 | 3 | 4.51  | 4.38 | 4.37 | 4.51 | 4.47 | 4.53  | 4.50  | 4.58  |

|           |          |                                                   |          |   |       |       |      |       |       |       |       |       |
|-----------|----------|---------------------------------------------------|----------|---|-------|-------|------|-------|-------|-------|-------|-------|
| TC1300261 | TPP2     | 7174 tripeptidyl peptidase II /// Tripeptidyl-pe  | 3.73E-08 | 3 | 4.53  | 4.15  | 4.03 | 4.46  | 4.46  | 4.55  | 4.66  | 4.57  |
| TC1400600 | TRAF3    | 7187 TNF receptor-associated factor 3             | 5.27E-13 | 3 | 5.49  | 5.10  | 4.96 | 5.80  | 5.72  | 5.71  | 5.80  | 5.65  |
| TC0601532 | TRAF3IP2 | 10758 TRAF3 interacting protein 2 /// Adapter     | 3.46E-15 | 3 | 3.90  | 3.79  | 3.72 | 3.73  | 3.76  | 3.93  | 4.02  | 3.99  |
| TC0202226 | TRAK2    | 66008 trafficking protein, kinesin binding 2      | 6.51E-05 | 3 | 5.82  | 5.17  | 5.32 | 5.62  | 5.54  | 5.56  | 5.69  | 5.61  |
| TC0601329 | TRAM2    | 9697 translocation associated membrane pro        | 3.16E-07 | 3 | 4.38  | 4.18  | 4.10 | 4.20  | 4.32  | 4.43  | 4.46  | 4.41  |
| TC1600668 | TRAPPC2L | 51693 trafficking protein particle complex 2-li   | 0.000273 | 3 | 4.71  | 4.69  | 4.53 | 4.63  | 4.80  | 4.79  | 4.82  | 4.74  |
| TC0601250 | TREM1    | 54210 triggering receptor expressed on myeloc     | 6.60E-05 | 3 | 10.25 | 10.47 | 9.89 | 10.13 | 10.06 | 10.38 | 10.31 | 10.50 |
| TC0601266 | TRERF1   | 55809 transcriptional regulating factor 1 /// T   | 2.45E-24 | 3 | 6.46  | 5.02  | 5.10 | 5.79  | 5.59  | 5.79  | 6.10  | 6.06  |
| TC1101104 | TRIM21   | 6737 tripartite motif-containing 21               | 1.23E-05 | 3 | 7.81  | 7.51  | 7.62 | 7.96  | 7.83  | 8.16  | 8.13  | 8.29  |
| TC0700737 | TRIM24   | 8805 tripartite motif-containing 24 /// Trans     | 4.07E-25 | 3 | 6.43  | 5.58  | 5.45 | 5.93  | 6.02  | 6.70  | 6.70  | 6.67  |
| TC0601094 | TRIM26   | 7726 tripartite motif-containing 26 /// Tripar    | 0.000407 | 3 | 5.29  | 5.21  | 5.18 | 5.29  | 5.30  | 5.34  | 5.42  | 5.46  |
| TC0102564 | TRIM33   | 51592 tripartite motif-containing 33              | 2.49E-09 | 3 | 7.90  | 7.41  | 7.38 | 7.52  | 7.40  | 7.64  | 7.76  | 7.77  |
| TC0600140 | TRIM38   | 10475 tripartite motif-containing 38              | 7.87E-11 | 3 | 7.68  | 7.50  | 7.12 | 7.20  | 7.02  | 7.55  | 7.64  | 7.78  |
| TC1101138 | TRIM5    | 85363 tripartite motif-containing 5 /// Tripart   | 6.14E-05 | 3 | 5.12  | 5.20  | 5.01 | 5.22  | 5.06  | 5.30  | 5.52  | 5.61  |
| TC1500403 | TRIP4    | 9325 thyroid hormone receptor interactor 4        | 0.000181 | 3 | 5.92  | 5.66  | 5.96 | 6.02  | 5.80  | 5.84  | 5.94  | 5.94  |
| TC1101766 | TRPC6    | 731423 // transient receptor potential cation cha | 9.86E-05 | 3 | 2.80  | 2.68  | 2.73 | 2.82  | 2.78  | 2.82  | 2.90  | 3.02  |
| TC1500953 | TRPM7    | 54822 transient receptor potential cation cha     | 1.05E-10 | 3 | 4.40  | 3.94  | 3.98 | 4.43  | 4.48  | 4.49  | 4.67  | 4.47  |
| TC1200463 | TSFM     | 10102 Ts translation elongation factor, mitoch    | 1.69E-06 | 3 | 5.44  | 5.20  | 5.20 | 5.23  | 5.29  | 5.36  | 5.36  | 5.33  |
| TC1700152 | TTC19    | 54902 tetratricopeptide repeat domain 19          | 9.38E-06 | 3 | 4.61  | 4.36  | 4.29 | 4.47  | 4.52  | 4.54  | 4.55  | 4.44  |
| TC0202066 | TTC21B   | 79809 tetratricopeptide repeat domain 21B         | 8.53E-14 | 3 | 3.32  | 2.91  | 2.90 | 2.99  | 2.99  | 3.05  | 3.19  | 3.21  |
| TC1400383 | TTL5     | 23093 tubulin tyrosine ligase-like family, mem    | 3.51E-16 | 3 | 4.92  | 4.16  | 4.20 | 4.40  | 4.39  | 4.49  | 4.69  | 4.61  |
| TC0601002 | TTRAP    | 51567 TRAF and TNF receptor associated prot       | 2.13E-08 | 3 | 8.28  | 7.84  | 8.03 | 8.44  | 8.41  | 8.57  | 8.37  | 8.40  |
| TC1500275 | TUBGCP4  | 27229 tubulin, gamma complex associated pro       | 1.00E-12 | 3 | 4.31  | 3.78  | 3.72 | 3.87  | 3.98  | 4.04  | 4.26  | 4.23  |
| TC0400926 | TXK      | 7294 TXK tyrosine kinase                          | 1.09E-07 | 3 | 3.82  | 3.37  | 3.36 | 3.61  | 3.60  | 3.67  | 3.81  | 3.69  |
| TC0601647 | TXLNB    | 167838 taxilin beta /// Beta-taxilin (Muscle-der  | 1.60E-13 | 3 | 3.74  | 3.31  | 3.39 | 3.34  | 3.28  | 3.58  | 3.76  | 3.85  |
| TC0901194 | TXNDC4   | 727931 // thioredoxin domain containing 4 (endo   | 3.45E-06 | 3 | 7.04  | 7.33  | 7.31 | 7.18  | 7.00  | 7.27  | 7.40  | 7.49  |
| TC0700351 | TYW1     | 55253 tRNA-yW synthesizing protein 1 homol        | 1.91E-05 | 3 | 3.97  | 3.89  | 3.83 | 4.07  | 4.09  | 4.10  | 4.23  | 4.14  |
| TC1900323 | UBA52    | 7311 ubiquitin A-52 residue ribosomal prote       | 9.02E-12 | 3 | 7.98  | 7.74  | 7.67 | 7.92  | 7.92  | 8.00  | 8.04  | 8.01  |
| TC1101415 | UBE2L6   | 9246 ubiquitin-conjugating enzyme E2L 6           | 8.07E-08 | 3 | 6.55  | 6.36  | 6.07 | 6.48  | 6.34  | 6.76  | 6.81  | 7.13  |
| TC0301087 | UBP1     | 7342 upstream binding protein 1 (LBP-1a) //,      | 0.000128 | 3 | 5.33  | 5.11  | 5.26 | 5.46  | 5.40  | 5.34  | 5.40  | 5.29  |
| TC1701421 | UBTF     | 7343 upstream binding transcription factor,       | 4.76E-06 | 3 | 6.68  | 6.36  | 6.39 | 6.67  | 6.71  | 6.66  | 6.74  | 6.71  |
| TC0900048 | UHRF2    | 115426 ubiquitin-like, containing PHD and RINC    | 3.37E-13 | 3 | 4.82  | 4.03  | 4.04 | 4.42  | 4.50  | 4.53  | 4.75  | 4.68  |
| TC1200757 | UNC119B  | 84747 unc-119 homolog B (C. elegans)              | 2.79E-07 | 3 | 4.66  | 4.39  | 4.25 | 4.48  | 4.58  | 4.64  | 4.78  | 4.66  |
| TC2200020 | USP18    | 11274 ubiquitin specific peptidase 18             | 0.000257 | 3 | 3.22  | 3.01  | 2.97 | 2.97  | 3.01  | 3.19  | 3.32  | 3.25  |



|           |                 |        |                                               |          |   |      |      |      |      |      |      |      |      |
|-----------|-----------------|--------|-----------------------------------------------|----------|---|------|------|------|------|------|------|------|------|
| TC0102285 | USP24           | ---    | Ubiquitin carboxyl-terminal hydrolase 2       | 8.37E-09 | 3 | 5.75 | 5.02 | 5.10 | 5.32 | 5.20 | 5.35 | 5.57 | 5.47 |
| TC2100019 | USP25           | 29761  | ubiquitin specific peptidase 25 /// Ubiquitin | 1.30E-05 | 3 | 7.15 | 6.92 | 7.00 | 7.05 | 6.86 | 7.14 | 7.31 | 7.33 |
| TC1101846 | USP28           | 57646  | ubiquitin specific peptidase 28 /// Ubiquitin | 9.15E-10 | 3 | 3.66 | 3.48 | 3.43 | 3.62 | 3.69 | 3.69 | 3.80 | 3.74 |
| TC0200415 | USP39           | 10713  | ubiquitin specific peptidase 39               | 0.000536 | 3 | 5.94 | 5.49 | 5.68 | 5.86 | 5.82 | 5.79 | 5.90 | 5.87 |
| TC0700053 | USP42           | 84132  | ubiquitin specific peptidase 42               | 6.43E-06 | 3 | 4.96 | 4.97 | 4.96 | 5.08 | 4.95 | 5.09 | 5.24 | 5.27 |
| TC1300064 | USPL1           | 10208  | ubiquitin specific peptidase like 1           | 2.70E-17 | 3 | 5.47 | 4.44 | 4.35 | 4.53 | 4.62 | 4.86 | 5.17 | 5.32 |
| TC0800511 | UTP23 /// C8orf | 84294  | UTP23, small subunit (SSU) processome         | 8.47E-06 | 3 | 3.91 | 3.75 | 3.80 | 3.82 | 3.77 | 3.89 | 3.91 | 3.98 |
| TC1100679 | UVRAG           | 7405   | UV radiation resistance associated gene       | 1.03E-05 | 3 | 6.43 | 6.22 | 6.10 | 6.22 | 6.17 | 6.34 | 6.53 | 6.49 |
| TC0600418 | VEGFA           | 7422   | vascular endothelial growth factor A ///      | 1.48E-08 | 3 | 4.80 | 4.67 | 4.50 | 4.76 | 4.95 | 4.95 | 4.90 | 4.86 |
| TC1701545 | VEZF1           | 7716   | vascular endothelial zinc finger 1            | 7.18E-06 | 3 | 8.15 | 8.08 | 8.06 | 8.23 | 8.10 | 8.30 | 8.32 | 8.41 |
| TC0900013 | VLDLR           | 7436   | very low density lipoprotein receptor /       | 7.91E-05 | 3 | 3.58 | 3.46 | 3.46 | 3.89 | 3.80 | 3.80 | 4.02 | 3.91 |
| TC1501012 | VPS13C          | 54832  | vacuolar protein sorting 13 homolog C         | 8.43E-05 | 3 | 4.94 | 4.66 | 4.64 | 4.99 | 4.90 | 5.01 | 5.24 | 5.10 |
| TC1401124 | WARS            | 7453   | tryptophanyl-tRNA synthetase                  | 4.40E-05 | 3 | 6.49 | 6.42 | 6.00 | 6.24 | 6.11 | 6.48 | 6.71 | 6.92 |
| TC0202355 | WDFY1           | 57590  | WD repeat and FYVE domain containing          | 3.27E-10 | 3 | 5.75 | 5.33 | 5.21 | 5.37 | 5.41 | 5.66 | 5.77 | 6.01 |
| TC0300167 | WDR48           | 57599  | WD repeat domain 48                           | 1.57E-05 | 3 | 6.41 | 6.18 | 6.03 | 6.14 | 6.01 | 6.23 | 6.30 | 6.39 |
| TC0301900 | WDR53           | 348793 | WD repeat domain 53                           | 3.11E-06 | 3 | 5.60 | 5.18 | 5.28 | 5.37 | 5.51 | 5.45 | 5.55 | 5.47 |
| TC0301495 | WDR5B           | 54554  | WD repeat domain 5B                           | 0.0005   | 3 | 4.58 | 4.15 | 4.26 | 4.41 | 4.37 | 4.46 | 4.43 | 4.36 |
| TC0800885 | WHSC1L1 /// N   | 54904  | Wolf-Hirschhorn syndrome candidate 1          | 6.77E-17 | 3 | 8.18 | 7.34 | 7.19 | 7.59 | 7.67 | 7.76 | 7.78 | 7.85 |
| TC1700076 | XAF1 /// NP_95  | 54739  | XIAP associated factor 1 /// XIAP associ      | 4.19E-11 | 3 | 6.13 | 5.01 | 4.78 | 4.86 | 4.64 | 5.57 | 6.22 | 6.57 |
| TC2200305 | XPNPEP3         | 63929  | X-prolyl aminopeptidase (aminopeptid          | 1.12E-07 | 3 | 4.78 | 4.52 | 4.56 | 4.63 | 4.65 | 4.64 | 4.80 | 4.72 |
| TC0800128 | XPO7            | 23039  | exportin 7                                    | 1.89E-13 | 3 | 5.88 | 5.04 | 5.01 | 5.50 | 5.52 | 5.53 | 5.60 | 5.60 |
| TC0100451 | YBX1            | 4904   | Y box binding protein 1 /// Nuclease se       | 6.95E-08 | 3 | 9.18 | 8.97 | 8.88 | 9.27 | 9.41 | 9.44 | 9.53 | 9.35 |
| TC0300844 | YEATS2          | 55689  | YEATS domain containing 2 /// YEATS d         | 1.01E-07 | 3 | 4.71 | 4.51 | 4.52 | 4.84 | 4.75 | 4.70 | 4.73 | 4.77 |
| TC1400372 | YLPM1           | ---    | YLP motif-containing protein 1 (Nuclea        | 0.000669 | 3 | 6.13 | 5.84 | 5.77 | 6.07 | 6.04 | 6.07 | 6.30 | 6.16 |
| TC1400498 | YY1             | 7528   | YY1 transcription factor                      | 3.22E-17 | 3 | 8.14 | 7.90 | 7.87 | 8.41 | 8.41 | 8.41 | 8.49 | 8.45 |
| TC2000859 | ZBP1            | 81030  | Z-DNA binding protein 1 /// Z-DNA-bin         | 7.81E-11 | 3 | 5.94 | 5.30 | 5.02 | 5.23 | 5.08 | 5.62 | 5.87 | 5.99 |
| TC0301407 | ZBTB11          | 27107  | zinc finger and BTB domain containing         | 7.64E-10 | 3 | 5.28 | 4.97 | 5.17 | 5.52 | 5.42 | 5.43 | 5.52 | 5.47 |
| TC0601515 | ZBTB24          | 9841   | zinc finger and BTB domain containing         | 4.39E-09 | 3 | 4.92 | 4.66 | 4.53 | 4.83 | 4.88 | 4.91 | 5.08 | 4.99 |
| TC0100080 | ZBTB48          | 3104   | zinc finger and BTB domain containing         | 0.0003   | 3 | 5.47 | 5.26 | 5.23 | 5.35 | 5.34 | 5.42 | 5.38 | 5.41 |
| TC1800231 | ZCCHC2          | 54877  | zinc finger, CCHC domain containing 2         | 5.44E-18 | 3 | 7.00 | 5.58 | 5.36 | 5.70 | 5.68 | 6.48 | 6.89 | 7.08 |
| TC0900178 | ZCCHC7          | 84186  | zinc finger, CCHC domain containing 7         | 4.57E-06 | 3 | 5.55 | 5.43 | 5.50 | 5.45 | 5.40 | 5.56 | 5.69 | 5.69 |
| TC1000149 | ZEB1            | 6935   | zinc finger E-box binding homeobox 1 /        | 0.000218 | 3 | 6.05 | 5.94 | 5.81 | 5.88 | 5.79 | 6.03 | 6.08 | 6.11 |
| TC0901041 | ZFAND5          | 7763   | zinc finger, AN1-type domain 5                | 5.15E-13 | 3 | 7.55 | 7.17 | 7.33 | 7.64 | 7.56 | 7.56 | 7.64 | 7.61 |
| TC0201468 | ZFP36L2         | 678    | zinc finger protein 36, C3H type-like 2       | 2.27E-23 | 3 | 6.35 | 5.04 | 4.96 | 5.32 | 5.45 | 5.84 | 5.97 | 6.09 |

|           |                          |        |                                            |          |   |      |      |      |      |      |      |      |      |
|-----------|--------------------------|--------|--------------------------------------------|----------|---|------|------|------|------|------|------|------|------|
| TC0601063 | ZKSCAN4                  | 387032 | zinc finger with KRAB and SCAN domain      | 4.58E-14 | 3 | 4.17 | 3.86 | 3.93 | 4.13 | 4.14 | 4.36 | 4.39 | 4.46 |
| TC1000002 | ZMYND11                  | 10771  | zinc finger, MYND domain containing 1      | 1.92E-09 | 3 | 4.96 | 4.58 | 4.69 | 5.18 | 5.01 | 5.19 | 5.45 | 5.34 |
| TC2000806 | ZMYND8                   | 23613  | zinc finger, MYND-type containing 8 ///    | 8.47E-09 | 3 | 5.45 | 4.89 | 5.03 | 5.26 | 5.23 | 5.22 | 5.40 | 5.25 |
| TC1900212 | ZNF136                   | 7695   | zinc finger protein 136                    | 2.58E-13 | 3 | 5.68 | 5.39 | 5.27 | 5.29 | 5.06 | 5.43 | 5.73 | 5.78 |
| TC1200853 | ZNF140                   | 7699   | zinc finger protein 140                    | 8.64E-05 | 3 | 4.18 | 4.27 | 4.24 | 4.10 | 4.16 | 4.22 | 4.36 | 4.33 |
| TC0600199 | ZNF192                   | 7745   | zinc finger protein 192                    | 7.44E-09 | 3 | 3.83 | 3.77 | 3.73 | 3.82 | 3.83 | 3.93 | 4.14 | 4.06 |
| TC0600202 | ZNF193                   | 7746   | zinc finger protein 193                    | 0.000145 | 3 | 3.77 | 3.71 | 3.61 | 3.60 | 3.66 | 3.77 | 3.96 | 3.89 |
| TC0200477 | ZNF2                     | 7549   | zinc finger protein 2 /// Zinc finger prot | 1.19E-05 | 3 | 4.26 | 3.97 | 4.31 | 4.26 | 4.23 | 4.15 | 4.25 | 4.26 |
| TC1900207 | ZNF20                    | 7568   | zinc finger protein 20                     | 8.47E-16 | 3 | 6.46 | 5.72 | 5.36 | 5.68 | 5.45 | 6.00 | 6.21 | 6.55 |
| TC0700859 | ZNF212                   | 7988   | zinc finger protein 212                    | 1.01E-07 | 3 | 6.07 | 5.74 | 5.80 | 5.76 | 5.77 | 5.90 | 6.01 | 5.95 |
| TC1900603 | ZNF224                   | 7767   | zinc finger protein 224 /// Zinc finger p  | 3.75E-05 | 3 | 4.35 | 4.31 | 4.22 | 4.20 | 4.16 | 4.34 | 4.48 | 4.46 |
| TC1800270 | ZNF236                   | 7776   | zinc finger protein 236 /// Zinc finger p  | 0.000646 | 3 | 4.62 | 4.51 | 4.56 | 4.66 | 4.63 | 4.60 | 4.66 | 4.59 |
| TC1800415 | ZNF24                    | 7572   | zinc finger protein 24                     | 5.99E-05 | 3 | 6.62 | 6.50 | 6.52 | 6.66 | 6.45 | 6.68 | 6.71 | 6.82 |
| TC1900369 | ZNF253                   | ---    | zinc finger protein 253 [Source:RefSeq_    | 0.000325 | 3 | 6.04 | 5.83 | 5.84 | 5.85 | 5.86 | 5.94 | 6.02 | 6.02 |
| TC1101856 | ZNF259                   | 8882   | zinc finger protein 259                    | 1.22E-05 | 3 | 4.56 | 4.41 | 4.29 | 4.67 | 4.74 | 4.75 | 4.85 | 4.79 |
| TC2100364 | ZNF295                   | 49854  | zinc finger protein 295                    | 7.30E-06 | 3 | 4.49 | 4.52 | 4.35 | 4.51 | 4.44 | 4.57 | 4.64 | 4.63 |
| TC1901772 | ZNF320                   | ---    | zinc finger protein 320 [Source:RefSeq_    | 7.44E-06 | 3 | 8.87 | 8.30 | 8.43 | 8.61 | 8.48 | 8.74 | 8.83 | 8.85 |
| TC1901404 | ZNF324B /// ZNF388569 // | 388569 | zinc finger protein 324B /// zinc finger p | 0.000272 | 3 | 4.51 | 4.35 | 4.31 | 4.52 | 4.38 | 4.41 | 4.54 | 4.57 |
| TC1901357 | ZNF429                   | 353088 | zinc finger protein 429                    | 0.000259 | 3 | 3.87 | 3.71 | 3.60 | 3.67 | 3.74 | 3.82 | 3.88 | 3.88 |
| TC1900353 | ZNF430                   | 80264  | zinc finger protein 430                    | 0.000124 | 3 | 5.92 | 5.80 | 5.76 | 5.71 | 5.60 | 5.85 | 5.95 | 5.97 |
| TC1901441 | ZNF461                   | 92283  | zinc finger protein 461                    | 0.000874 | 3 | 3.65 | 3.54 | 3.56 | 3.46 | 3.59 | 3.61 | 3.71 | 3.73 |
| TC1901770 | ZNF468 /// ZNF90333 ///  | 90333  | zinc finger protein 468 /// zinc finger p  | 4.85E-05 | 3 | 4.57 | 4.33 | 4.46 | 4.58 | 4.51 | 4.49 | 4.63 | 4.63 |
| TC1900776 | ZNF480                   | 147657 | zinc finger protein 480                    | 7.38E-07 | 3 | 3.96 | 3.77 | 3.71 | 4.09 | 4.02 | 4.16 | 4.45 | 4.24 |
| TC1900348 | ZNF486                   | ---    | Zinc finger protein 486. [Source:Unipro    | 0.000872 | 3 | 5.26 | 5.22 | 5.44 | 5.23 | 4.99 | 5.49 | 5.56 | 5.68 |
| TC0700525 | ZNF498                   | 221785 | zinc finger protein 498 /// zinc finger ai | 0.000412 | 3 | 4.92 | 4.72 | 4.74 | 4.81 | 4.77 | 4.79 | 4.88 | 4.89 |
| TC1900400 | ZNF507                   | 22847  | zinc finger protein 507 /// Zinc finger p  | 7.97E-11 | 3 | 5.07 | 4.64 | 4.82 | 5.01 | 5.07 | 5.15 | 5.33 | 5.17 |
| TC0400046 | ZNF509                   | 166793 | zinc finger protein 509 /// Zinc finger p  | 7.14E-07 | 3 | 4.26 | 3.95 | 3.98 | 4.08 | 3.92 | 4.15 | 4.31 | 4.28 |
| TC0400819 | ZNF518B                  | 85460  | zinc finger protein 518B                   | 2.12E-06 | 3 | 5.26 | 5.19 | 5.08 | 5.08 | 4.89 | 5.10 | 5.22 | 5.38 |
| TC1900778 | ZNF528 /// Q6I---        | ---    | Zinc finger protein 528. [Source:Unipro    | 0.000336 | 3 | 4.37 | 4.17 | 4.21 | 4.35 | 4.30 | 4.26 | 4.50 | 4.44 |
| TC1900063 | ZNF555                   | 148254 | zinc finger protein 555 /// Zinc finger p  | 1.83E-05 | 3 | 3.09 | 3.04 | 2.99 | 3.12 | 3.12 | 3.20 | 3.23 | 3.25 |
| TC1900124 | ZNF557                   | 79230  | zinc finger protein 557                    | 3.90E-06 | 3 | 5.47 | 5.05 | 5.04 | 5.19 | 5.05 | 5.25 | 5.37 | 5.27 |
| TC1901446 | ZNF585A                  | 199704 | zinc finger protein 585A /// Zinc finger   | 1.30E-05 | 3 | 5.13 | 5.06 | 5.24 | 5.04 | 4.82 | 5.08 | 5.31 | 5.32 |
| TC1701501 | ZNF652                   | 22834  | zinc finger protein 652                    | 3.27E-08 | 3 | 7.98 | 7.30 | 7.28 | 7.57 | 7.35 | 7.69 | 7.75 | 7.93 |
| TC1900785 | ZNF701                   | 55762  | zinc finger protein 701                    | 3.62E-07 | 3 | 5.77 | 5.44 | 5.48 | 5.58 | 5.42 | 5.66 | 5.68 | 5.75 |

|           |                |                                                   |          |   |      |      |      |      |      |      |      |      |
|-----------|----------------|---------------------------------------------------|----------|---|------|------|------|------|------|------|------|------|
| TC0400746 | ZNF721         | 170960 zinc finger protein 721                    | 4.40E-05 | 3 | 4.26 | 4.14 | 4.16 | 4.19 | 4.10 | 4.24 | 4.36 | 4.36 |
| TC1200365 | ZNF740         | 283337 zinc finger protein 740                    | 8.46E-06 | 3 | 5.53 | 5.18 | 5.45 | 5.41 | 5.21 | 5.37 | 5.58 | 5.51 |
| TC1900775 | ZNF766         | 90321 zinc finger protein 766                     | 6.15E-11 | 3 | 5.60 | 5.29 | 5.28 | 5.39 | 5.32 | 5.40 | 5.52 | 5.56 |
| TC1901188 | ZNF823         | 55552 zinc finger protein 823                     | 3.90E-05 | 3 | 3.98 | 3.79 | 3.93 | 4.13 | 4.00 | 4.13 | 4.33 | 4.26 |
| TC1700366 | ZNF830         | 91603 zinc finger protein 830                     | 9.97E-05 | 3 | 5.68 | 5.39 | 5.39 | 5.54 | 5.65 | 5.71 | 5.92 | 5.74 |
| TC1900347 | ZNF90          | 731498 Zinc finger protein 90 (Zinc finger prote  | 0.000793 | 3 | 3.32 | 3.25 | 3.32 | 3.21 | 3.25 | 3.35 | 3.35 | 3.41 |
| TC0700328 | ZNF92          | 168374 zinc finger protein 92 /// Zinc finger pro | 2.87E-05 | 3 | 4.48 | 4.58 | 4.54 | 4.46 | 4.53 | 4.63 | 4.80 | 4.86 |
| TC1900346 | ZNF93 /// ZNF7 | 81931 zinc finger protein 93 /// Zinc finger pro  | 3.81E-06 | 3 | 5.48 | 5.63 | 5.65 | 5.43 | 5.39 | 5.63 | 5.75 | 5.79 |
| TC2000817 | ZNFX1          | 57169 zinc finger, NFX1-type containing 1 ///     | 1.32E-06 | 3 | 6.98 | 7.15 | 6.72 | 6.99 | 6.95 | 7.14 | 7.20 | 7.25 |
| TC1700387 | ZNHIT3         | 9326 zinc finger, HIT type 3                      | 1.91E-07 | 3 | 5.07 | 4.78 | 4.83 | 4.90 | 4.98 | 5.03 | 5.18 | 5.17 |
| TC0600198 | ZSCAN16        | 80345 zinc finger and SCAN domain containin       | 3.29E-08 | 3 | 5.04 | 4.67 | 4.66 | 4.67 | 4.56 | 4.75 | 4.96 | 5.01 |
| TC1500888 | ZSCAN29        | 146050 zinc finger and SCAN domain containin      | 2.19E-12 | 3 | 4.00 | 3.40 | 3.33 | 3.69 | 3.51 | 3.65 | 4.05 | 3.96 |
| TC0301093 | ---            | ---                                               | 1.24E-17 | 3 | 8.34 | 6.27 | 5.86 | 6.37 | 6.41 | 7.19 | 7.36 | 7.80 |
| TC1400358 | ---            | ---                                               | 2.99E-17 | 3 | 7.59 | 6.16 | 6.41 | 7.21 | 7.03 | 7.29 | 7.48 | 7.54 |
| TC1400697 | ---            | ---                                               | 2.74E-15 | 3 | 3.33 | 2.69 | 2.62 | 2.81 | 2.66 | 2.92 | 3.15 | 3.27 |
| TC1300135 | ---            | ---                                               | 4.05E-15 | 3 | 4.67 | 3.04 | 3.01 | 3.93 | 3.51 | 4.06 | 4.59 | 4.75 |
| TC0900977 | ---            | ---                                               | 9.56E-15 | 3 | 8.02 | 6.43 | 6.57 | 6.73 | 6.74 | 7.34 | 7.45 | 7.51 |
| TC0600852 | ---            | ---                                               | 1.32E-14 | 3 | 5.66 | 4.91 | 4.86 | 5.16 | 5.19 | 5.66 | 5.78 | 5.89 |
| TC0X00357 | ---            | ---                                               | 2.19E-14 | 3 | 5.95 | 4.93 | 4.91 | 5.15 | 5.11 | 5.44 | 5.69 | 5.59 |
| TC0601034 | ---            | ---                                               | 6.51E-14 | 3 | 6.20 | 4.72 | 4.92 | 5.42 | 5.27 | 5.56 | 5.77 | 5.76 |
| TC1100079 | ---            | ---                                               | 7.12E-14 | 3 | 6.89 | 4.87 | 4.56 | 5.20 | 5.32 | 6.03 | 6.14 | 6.50 |
| TC0901016 | ---            | ---                                               | 8.69E-14 | 3 | 5.61 | 4.13 | 4.31 | 4.88 | 4.37 | 4.85 | 5.12 | 5.15 |
| TC1100650 | ---            | ---                                               | 1.32E-13 | 3 | 7.93 | 5.89 | 5.65 | 6.40 | 6.29 | 6.87 | 7.25 | 7.34 |
| TC1700372 | ---            | ---                                               | 2.46E-13 | 3 | 6.18 | 5.45 | 5.41 | 5.88 | 5.99 | 6.21 | 6.33 | 6.38 |
| TC0400274 | ---            | ---                                               | 3.37E-13 | 3 | 6.79 | 6.36 | 6.16 | 7.00 | 6.69 | 7.49 | 8.11 | 8.45 |
| TC0600321 | ---            | ---                                               | 4.14E-13 | 3 | 7.05 | 6.75 | 6.75 | 7.20 | 7.18 | 7.39 | 7.40 | 7.44 |
| TC1001207 | ---            | ---                                               | 6.25E-13 | 3 | 4.93 | 3.96 | 4.32 | 5.29 | 4.81 | 5.34 | 5.64 | 5.63 |
| TC1500913 | ---            | ---                                               | 7.60E-13 | 3 | 5.19 | 4.79 | 4.81 | 5.12 | 4.94 | 5.27 | 5.37 | 5.41 |
| TC0301556 | ---            | ---                                               | 1.04E-12 | 3 | 8.48 | 7.55 | 7.00 | 7.31 | 7.43 | 8.15 | 8.14 | 8.40 |
| TC0900585 | ---            | ---                                               | 1.28E-12 | 3 | 4.55 | 4.13 | 3.92 | 4.35 | 4.41 | 4.61 | 4.86 | 4.87 |
| TC0401326 | ---            | ---                                               | 1.52E-12 | 3 | 5.49 | 3.77 | 3.12 | 3.91 | 3.94 | 4.60 | 4.87 | 4.64 |
| TC1401104 | ---            | ---                                               | 2.89E-12 | 3 | 4.73 | 3.94 | 4.16 | 4.41 | 4.76 | 4.85 | 4.89 | 4.57 |
| TC1900631 | ---            | ---                                               | 3.45E-12 | 3 | 6.58 | 6.18 | 6.22 | 6.47 | 6.43 | 6.69 | 6.83 | 6.79 |
| TC0301342 | ---            | ---                                               | 4.83E-12 | 3 | 5.61 | 5.06 | 4.88 | 5.00 | 4.93 | 5.32 | 5.39 | 5.68 |

|            |        |          |   |      |      |      |      |      |      |      |      |
|------------|--------|----------|---|------|------|------|------|------|------|------|------|
| TC1200567  | ---    | 1.01E-11 | 3 | 5.66 | 5.45 | 5.43 | 5.63 | 5.49 | 6.10 | 6.13 | 6.22 |
| TC1200276  | ---    | 2.95E-11 | 3 | 6.36 | 5.73 | 5.58 | 6.13 | 5.97 | 6.34 | 6.44 | 6.44 |
| TC0102617  | ---    | 1.24E-10 | 3 | 5.60 | 5.01 | 4.96 | 5.12 | 5.08 | 5.35 | 5.38 | 5.51 |
| TC0400279  | ---    | 5.56E-10 | 3 | 4.10 | 2.02 | 2.32 | 3.10 | 2.50 | 3.01 | 3.56 | 3.45 |
| TC1400645  | ---    | 6.16E-10 | 3 | 5.45 | 5.39 | 5.37 | 5.43 | 5.41 | 5.67 | 6.06 | 5.87 |
| TC0200660  | ---    | 8.66E-10 | 3 | 5.84 | 5.25 | 5.25 | 5.00 | 5.38 | 6.08 | 6.22 | 5.96 |
| TC0400272  | ---    | 1.10E-09 | 3 | 7.49 | 7.58 | 7.26 | 7.41 | 7.41 | 7.99 | 8.17 | 8.31 |
| TC1600307  | ---    | 1.16E-09 | 3 | 5.78 | 4.52 | 4.55 | 5.05 | 4.97 | 5.29 | 5.36 | 5.42 |
| TC0200811  | ---    | 1.41E-09 | 3 | 8.48 | 7.55 | 7.46 | 7.97 | 8.07 | 8.15 | 8.12 | 8.21 |
| TC0301713  | ---    | 1.44E-09 | 3 | 9.44 | 9.25 | 8.91 | 9.50 | 9.65 | 9.77 | 9.87 | 9.65 |
| TC1701257  | 730422 | 1.64E-09 | 3 | 5.55 | 5.51 | 5.22 | 5.84 | 5.76 | 6.01 | 6.36 | 6.54 |
| TC1700967  | ---    | 1.68E-09 | 3 | 4.98 | 4.62 | 4.56 | 4.78 | 4.71 | 4.82 | 4.92 | 4.81 |
| TC1701577  | ---    | 1.81E-09 | 3 | 3.41 | 3.11 | 3.17 | 3.44 | 3.27 | 3.65 | 3.80 | 3.70 |
| TC0600296  | ---    | 2.21E-09 | 3 | 7.69 | 7.42 | 7.40 | 7.66 | 7.57 | 7.91 | 7.97 | 8.04 |
| TC01r00009 | ---    | 2.41E-09 | 3 | 4.52 | 3.96 | 3.96 | 4.26 | 4.14 | 4.42 | 4.67 | 4.53 |
| TC1901871  | ---    | 2.42E-09 | 3 | 6.80 | 6.30 | 6.50 | 6.99 | 6.90 | 6.89 | 6.99 | 7.03 |
| TC0700322  | ---    | 3.09E-09 | 3 | 4.91 | 4.31 | 4.36 | 4.47 | 4.49 | 4.71 | 4.95 | 4.80 |
| TC0200422  | ---    | 3.26E-09 | 3 | 6.60 | 6.01 | 5.74 | 6.14 | 6.14 | 6.31 | 6.50 | 6.53 |
| TC1001266  | ---    | 3.80E-09 | 3 | 5.57 | 5.19 | 5.29 | 5.80 | 5.61 | 6.32 | 6.34 | 6.51 |
| TC0700586  | ---    | 4.41E-09 | 3 | 5.01 | 4.35 | 4.38 | 5.23 | 5.39 | 5.44 | 5.55 | 5.36 |
| TC0100994  | ---    | 5.06E-09 | 3 | 7.34 | 6.61 | 6.79 | 6.81 | 6.74 | 7.01 | 7.13 | 7.15 |
| TC0100989  | ---    | 6.75E-09 | 3 | 4.76 | 4.21 | 4.14 | 4.39 | 4.37 | 4.60 | 4.72 | 4.59 |
| TC0700587  | ---    | 6.98E-09 | 3 | 8.16 | 7.38 | 7.42 | 8.35 | 8.44 | 8.57 | 8.60 | 8.48 |
| TC0900278  | ---    | 7.31E-09 | 3 | 5.49 | 4.46 | 4.35 | 4.54 | 4.61 | 5.19 | 5.11 | 5.03 |
| TC0700332  | ---    | 8.47E-09 | 3 | 4.09 | 3.71 | 3.69 | 3.80 | 3.87 | 4.05 | 4.17 | 4.09 |
| TC0500360  | ---    | 1.04E-08 | 3 | 4.83 | 4.47 | 4.16 | 4.46 | 4.44 | 4.81 | 5.18 | 5.37 |
| TC0102620  | ---    | 1.36E-08 | 3 | 6.82 | 6.48 | 6.60 | 7.03 | 6.89 | 7.03 | 7.06 | 7.05 |
| TC0100987  | ---    | 1.65E-08 | 3 | 6.81 | 6.39 | 6.52 | 6.81 | 6.78 | 6.92 | 6.89 | 6.97 |
| TC0900279  | ---    | 2.23E-08 | 3 | 4.08 | 3.43 | 3.25 | 3.59 | 3.81 | 3.93 | 3.81 | 3.93 |
| TC2100094  | ---    | 2.36E-08 | 3 | 3.08 | 2.82 | 2.51 | 2.48 | 2.67 | 2.83 | 2.99 | 3.06 |
| TC0101917  | ---    | 2.95E-08 | 3 | 4.01 | 3.63 | 3.62 | 3.85 | 3.89 | 3.97 | 4.18 | 4.02 |
| TC1500227  | ---    | 3.47E-08 | 3 | 6.85 | 6.86 | 6.55 | 6.84 | 6.74 | 7.28 | 7.36 | 7.35 |
| TC0601057  | ---    | 4.23E-08 | 3 | 6.72 | 6.02 | 5.76 | 5.73 | 5.90 | 6.57 | 6.26 | 6.59 |
| TC0900605  | ---    | 7.18E-08 | 3 | 5.02 | 4.61 | 4.35 | 5.12 | 5.16 | 5.01 | 5.04 | 5.21 |

|           |     |          |   |      |      |      |      |      |      |      |      |
|-----------|-----|----------|---|------|------|------|------|------|------|------|------|
| TC1101960 | --- | 9.14E-08 | 3 | 5.70 | 5.25 | 5.05 | 5.37 | 5.41 | 5.47 | 5.51 | 5.52 |
| TC1701123 | --- | 1.01E-07 | 3 | 4.18 | 2.77 | 2.64 | 3.36 | 2.89 | 3.50 | 3.96 | 3.89 |
| TC0101927 | --- | 1.06E-07 | 3 | 4.91 | 4.76 | 4.89 | 5.09 | 5.03 | 5.17 | 5.48 | 5.37 |
| TC0200714 | --- | 1.94E-07 | 3 | 2.84 | 2.39 | 2.50 | 2.95 | 2.71 | 2.98 | 3.14 | 3.06 |
| TC0901367 | --- | 3.40E-07 | 3 | 5.54 | 5.43 | 5.31 | 5.31 | 5.20 | 5.51 | 5.61 | 5.72 |
| TC0300686 | --- | 8.83E-07 | 3 | 6.80 | 6.38 | 6.24 | 6.39 | 6.33 | 6.64 | 6.65 | 6.81 |
| TC0300269 | --- | 8.95E-07 | 3 | 7.15 | 5.72 | 5.83 | 6.36 | 6.62 | 6.74 | 6.86 | 6.87 |
| TC1700933 | --- | 9.94E-07 | 3 | 4.81 | 4.42 | 4.44 | 4.76 | 4.86 | 4.94 | 5.07 | 5.05 |
| TC0301425 | --- | 1.27E-06 | 3 | 4.90 | 4.16 | 4.06 | 4.24 | 4.26 | 4.32 | 4.84 | 4.49 |
| TC0900344 | --- | 2.51E-06 | 3 | 4.81 | 4.51 | 4.36 | 4.47 | 4.49 | 4.56 | 4.78 | 4.64 |
| TC1400917 | --- | 3.09E-06 | 3 | 4.11 | 3.39 | 3.58 | 3.80 | 3.77 | 3.82 | 4.03 | 3.97 |
| TC0600049 | --- | 3.34E-06 | 3 | 4.25 | 3.68 | 3.65 | 3.87 | 4.02 | 4.17 | 4.23 | 4.11 |
| TC1701256 | --- | 3.38E-06 | 3 | 6.67 | 6.50 | 6.24 | 6.79 | 6.48 | 6.78 | 7.09 | 7.39 |
| TC0900290 | --- | 4.14E-06 | 3 | 4.09 | 3.74 | 3.79 | 4.00 | 3.94 | 4.01 | 4.18 | 4.18 |
| TC0801104 | --- | 4.79E-06 | 3 | 6.35 | 5.55 | 5.62 | 5.89 | 5.91 | 6.18 | 6.23 | 6.08 |
| TC2200144 | --- | 5.99E-06 | 3 | 3.76 | 3.37 | 3.54 | 3.92 | 4.02 | 4.16 | 4.40 | 4.08 |
| TC0400757 | --- | 6.31E-06 | 3 | 2.78 | 2.17 | 2.19 | 2.33 | 2.33 | 2.57 | 2.61 | 2.79 |
| TC0600967 | --- | 6.31E-06 | 3 | 2.86 | 2.61 | 2.52 | 2.93 | 2.95 | 3.27 | 3.76 | 3.49 |
| TC1100447 | --- | 6.73E-06 | 3 | 4.50 | 4.01 | 4.10 | 4.54 | 4.48 | 4.73 | 4.95 | 4.96 |
| TC1700156 | --- | 7.02E-06 | 3 | 3.64 | 3.15 | 3.32 | 3.66 | 3.47 | 3.60 | 3.84 | 3.85 |
| TC0100710 | --- | 8.64E-06 | 3 | 4.09 | 3.80 | 3.74 | 3.89 | 3.67 | 4.30 | 4.62 | 4.88 |
| TC0900991 | --- | 8.81E-06 | 3 | 4.84 | 4.63 | 4.80 | 4.80 | 4.74 | 4.82 | 4.96 | 5.00 |
| TC1400925 | --- | 1.07E-05 | 3 | 5.46 | 5.14 | 5.13 | 5.34 | 5.44 | 5.41 | 5.58 | 5.48 |
| TC0102607 | --- | 1.16E-05 | 3 | 6.60 | 5.92 | 5.76 | 5.95 | 6.05 | 6.12 | 6.34 | 6.39 |
| TC0201742 | --- | 2.02E-05 | 3 | 4.26 | 4.17 | 3.97 | 4.15 | 4.51 | 4.54 | 4.63 | 4.30 |
| TC1100943 | --- | 2.18E-05 | 3 | 6.43 | 5.88 | 5.79 | 6.21 | 6.14 | 6.42 | 6.50 | 6.61 |
| TC0103143 | --- | 2.20E-05 | 3 | 4.47 | 4.68 | 4.24 | 4.25 | 4.69 | 4.89 | 4.42 | 4.78 |
| TC0600828 | --- | 2.26E-05 | 3 | 2.80 | 2.50 | 2.60 | 2.81 | 2.70 | 2.92 | 3.09 | 3.05 |
| TC0100923 | --- | 2.66E-05 | 3 | 6.98 | 7.03 | 6.83 | 6.99 | 6.98 | 7.53 | 7.66 | 8.08 |
| TC0100708 | --- | 3.64E-05 | 3 | 3.25 | 2.60 | 2.61 | 2.68 | 2.51 | 3.03 | 3.21 | 3.28 |
| TC0600320 | --- | 3.65E-05 | 3 | 4.94 | 4.25 | 4.04 | 4.07 | 4.32 | 4.69 | 4.71 | 4.85 |
| TC0301238 | --- | 3.75E-05 | 3 | 5.47 | 4.89 | 4.82 | 5.07 | 4.92 | 5.27 | 5.20 | 5.49 |
| TC0X00880 | --- | 4.37E-05 | 3 | 3.82 | 3.19 | 3.15 | 3.16 | 3.12 | 3.50 | 3.57 | 3.68 |
| TC0100950 | --- | 5.34E-05 | 3 | 3.33 | 3.07 | 3.07 | 3.25 | 3.19 | 3.38 | 3.42 | 3.43 |

|           |     |          |   |       |       |       |       |       |       |       |       |
|-----------|-----|----------|---|-------|-------|-------|-------|-------|-------|-------|-------|
| TC0201467 | --- | 5.44E-05 | 3 | 4.36  | 4.21  | 3.97  | 3.89  | 4.10  | 4.25  | 4.36  | 4.29  |
| TC1000929 | --- | 5.44E-05 | 3 | 4.81  | 4.27  | 4.18  | 4.39  | 4.39  | 4.50  | 4.79  | 4.56  |
| TC1700013 | --- | 6.26E-05 | 3 | 6.51  | 6.29  | 6.33  | 6.49  | 6.61  | 6.62  | 6.73  | 6.66  |
| TC0101730 | --- | 6.66E-05 | 3 | 7.74  | 7.06  | 7.18  | 7.40  | 7.37  | 7.67  | 7.66  | 7.67  |
| TC1300614 | --- | 7.92E-05 | 3 | 3.93  | 3.69  | 3.68  | 3.88  | 3.73  | 3.85  | 3.85  | 4.32  |
| TC1101707 | --- | 8.56E-05 | 3 | 3.65  | 3.66  | 3.31  | 3.42  | 3.49  | 3.62  | 3.67  | 3.67  |
| TC1400628 | --- | 9.87E-05 | 3 | 5.06  | 4.81  | 4.83  | 4.83  | 4.79  | 5.01  | 5.10  | 5.16  |
| TC1800023 | --- | 9.88E-05 | 3 | 4.46  | 4.03  | 3.90  | 4.43  | 4.15  | 4.41  | 4.41  | 4.31  |
| TC0500404 | --- | 0.000101 | 3 | 3.63  | 3.57  | 3.61  | 3.66  | 3.57  | 3.62  | 3.81  | 3.98  |
| TC0X00600 | --- | 0.00011  | 3 | 3.67  | 2.88  | 2.97  | 3.08  | 3.01  | 3.27  | 3.40  | 3.54  |
| TC0800528 | --- | 0.000112 | 3 | 3.91  | 3.53  | 3.48  | 3.90  | 3.78  | 3.86  | 4.00  | 3.79  |
| TC0102690 | --- | 0.000114 | 3 | 5.29  | 4.51  | 4.24  | 4.72  | 4.76  | 4.92  | 5.03  | 4.98  |
| TC0500475 | --- | 0.000116 | 3 | 6.43  | 6.68  | 5.75  | 5.92  | 6.18  | 6.28  | 6.53  | 6.56  |
| TC0400278 | --- | 0.000116 | 3 | 2.34  | 2.06  | 2.09  | 2.42  | 2.36  | 2.53  | 2.58  | 2.54  |
| TC0100100 | --- | 0.000118 | 3 | 5.33  | 5.23  | 5.09  | 4.88  | 5.10  | 5.17  | 5.61  | 5.44  |
| TC0500517 | --- | 0.000131 | 3 | 6.68  | 6.13  | 5.82  | 5.92  | 6.07  | 6.25  | 6.56  | 6.47  |
| TC2000891 | --- | 0.000137 | 3 | 6.33  | 6.39  | 6.35  | 6.50  | 6.42  | 6.51  | 6.47  | 6.74  |
| TC0901014 | --- | 0.000139 | 3 | 10.29 | 10.15 | 10.37 | 10.26 | 10.39 | 10.63 | 10.50 | 10.66 |
| TC1100164 | --- | 0.000183 | 3 | 5.09  | 4.60  | 4.44  | 4.62  | 4.85  | 4.98  | 5.22  | 4.99  |
| TC0100205 | --- | 0.000201 | 3 | 4.86  | 4.40  | 4.42  | 4.63  | 4.68  | 4.65  | 4.81  | 4.59  |
| TC0401040 | --- | 0.000221 | 3 | 3.60  | 3.10  | 3.11  | 3.35  | 3.46  | 3.72  | 3.63  | 3.57  |
| TC0103398 | --- | 0.000226 | 3 | 3.46  | 3.20  | 3.22  | 3.42  | 3.26  | 3.42  | 3.64  | 3.52  |
| TC0401405 | --- | 0.000244 | 3 | 5.14  | 4.74  | 4.91  | 5.16  | 5.08  | 5.07  | 5.17  | 5.01  |
| TC2000678 | --- | 0.000246 | 3 | 3.58  | 3.36  | 3.14  | 3.13  | 2.84  | 3.19  | 3.81  | 3.51  |
| TC0601432 | --- | 0.000249 | 3 | 5.87  | 5.26  | 5.34  | 5.59  | 5.70  | 5.85  | 6.01  | 5.72  |
| TC1100946 | --- | 0.00031  | 3 | 3.30  | 3.07  | 3.14  | 3.28  | 3.44  | 3.42  | 3.44  | 3.52  |
| TC0900606 | --- | 0.000324 | 3 | 6.35  | 5.86  | 5.24  | 5.40  | 5.59  | 5.99  | 6.54  | 6.15  |
| TC1200571 | --- | 0.000338 | 3 | 4.80  | 4.52  | 4.56  | 4.59  | 4.57  | 4.68  | 4.77  | 4.83  |
| TC1701566 | --- | 0.000348 | 3 | 3.74  | 3.77  | 3.73  | 3.40  | 3.58  | 3.95  | 4.10  | 3.85  |
| TC0800921 | --- | 0.00035  | 3 | 4.49  | 4.12  | 3.82  | 3.81  | 4.05  | 4.51  | 4.66  | 4.59  |
| TC0701302 | --- | 0.000354 | 3 | 4.05  | 3.89  | 3.88  | 4.02  | 4.09  | 4.02  | 4.15  | 4.02  |
| TC1500916 | --- | 0.000372 | 3 | 3.20  | 2.30  | 2.56  | 2.47  | 2.66  | 2.72  | 3.30  | 3.09  |
| TC0201766 | --- | 0.000432 | 3 | 3.76  | 3.63  | 3.53  | 3.54  | 3.88  | 3.86  | 3.89  | 3.77  |
| TC1300491 | --- | 0.000443 | 3 | 5.39  | 5.05  | 5.19  | 5.38  | 5.41  | 5.52  | 5.45  | 5.46  |

|            |          |                                               |          |      |      |      |      |      |      |      |      |      |
|------------|----------|-----------------------------------------------|----------|------|------|------|------|------|------|------|------|------|
| TC01r00021 | ---      | 0.000487                                      | 3        | 4.39 | 4.03 | 4.06 | 4.24 | 4.19 | 4.21 | 4.35 | 4.32 |      |
| TC0700033  | 641911   | 0.000488                                      | 3        | 4.80 | 4.64 | 4.83 | 4.81 | 4.78 | 4.84 | 4.90 | 4.92 |      |
| TC1000143  | ---      | 0.000496                                      | 3        | 3.24 | 2.83 | 2.79 | 2.88 | 3.49 | 3.36 | 3.27 | 3.14 |      |
| TC0900245  | ---      | 0.000525                                      | 3        | 7.70 | 7.49 | 7.90 | 7.79 | 7.62 | 8.13 | 8.09 | 8.06 |      |
| TC0800537  | ---      | 0.000526                                      | 3        | 3.34 | 3.04 | 2.87 | 3.14 | 3.46 | 3.70 | 3.67 | 3.46 |      |
| TC1500915  | ---      | 0.000529                                      | 3        | 3.26 | 2.61 | 2.82 | 2.76 | 2.84 | 3.21 | 3.29 | 3.04 |      |
| TC0900002  | ---      | 0.000536                                      | 3        | 8.48 | 8.28 | 8.19 | 8.31 | 8.24 | 8.45 | 8.50 | 8.49 |      |
| TC1500478  | ---      | 0.000539                                      | 3        | 3.55 | 3.36 | 3.43 | 3.42 | 3.47 | 3.48 | 3.58 | 3.53 |      |
| TC1100166  | ---      | 0.00057                                       | 3        | 6.81 | 6.33 | 6.38 | 6.52 | 6.56 | 6.62 | 6.72 | 6.56 |      |
| TC1400067  | ---      | 0.000613                                      | 3        | 4.85 | 4.93 | 4.90 | 4.95 | 4.96 | 4.99 | 5.09 | 5.27 |      |
| TC0101048  | ---      | 0.000628                                      | 3        | 4.42 | 4.16 | 4.33 | 4.31 | 4.28 | 4.35 | 4.47 | 4.48 |      |
| TC0102675  | ---      | 0.000752                                      | 3        | 5.41 | 5.38 | 4.96 | 5.29 | 5.49 | 5.40 | 5.58 | 5.37 |      |
| TC1300110  | ---      | 0.000831                                      | 3        | 2.76 | 2.45 | 2.41 | 2.41 | 2.30 | 2.64 | 2.98 | 3.24 |      |
| TC0100418  | ---      | 0.00084                                       | 3        | 3.78 | 3.46 | 3.32 | 3.56 | 3.69 | 3.70 | 3.84 | 3.69 |      |
| TC2100151  | ---      | 0.000894                                      | 3        | 5.46 | 4.28 | 4.10 | 4.77 | 4.88 | 4.82 | 5.13 | 4.94 |      |
| TC1100077  | ---      | 0.000993                                      | 3        | 4.92 | 4.74 | 4.59 | 4.68 | 4.71 | 4.98 | 5.10 | 4.95 |      |
| TC0901212  | ABCA1    | 19 ATP-binding cassette, sub-family A (AB     | 7.19E-07 | 4    | 7.07 | 5.98 | 5.75 | 6.26 | 6.10 | 6.37 | 6.62 | 6.57 |
| TC1900030  | ABCA7    | 10347 ATP-binding cassette, sub-family A (AB  | 2.88E-26 | 4    | 5.69 | 5.14 | 5.01 | 5.06 | 5.13 | 5.11 | 5.13 | 5.13 |
| TC1000504  | ABCC2    | 1244 ATP-binding cassette, sub-family C (CFT  | 6.62E-09 | 4    | 3.14 | 2.77 | 2.81 | 2.92 | 2.88 | 2.81 | 2.83 | 2.81 |
| TC0301810  | ABCC5    | 10057 ATP-binding cassette, sub-family C (CFT | 1.71E-11 | 4    | 5.48 | 4.72 | 4.43 | 4.58 | 4.66 | 4.55 | 4.55 | 4.54 |
| TC2100150  | ABCG1    | 9619 ATP-binding cassette, sub-family G (WF   | 4.33E-06 | 4    | 4.81 | 4.38 | 4.27 | 4.40 | 4.33 | 4.41 | 4.43 | 4.49 |
| TC1500606  | ABHD2    | 11057 abhydrolase domain containing 2         | 0.000661 | 4    | 8.48 | 8.09 | 8.08 | 7.94 | 7.75 | 7.99 | 8.09 | 8.28 |
| TC1800366  | ABHD3    | 171586 abhydrolase domain containing 3        | 1.87E-16 | 4    | 6.65 | 5.45 | 5.57 | 5.64 | 5.53 | 5.91 | 6.02 | 6.05 |
| TC1700574  | ABI3     | 51225 ABI gene family, member 3               | 1.78E-09 | 4    | 5.52 | 4.90 | 4.96 | 4.95 | 5.00 | 5.06 | 4.96 | 5.01 |
| TC1200701  | ACAD10   | 80724 acyl-Coenzyme A dehydrogenase famil     | 2.66E-14 | 4    | 4.56 | 4.12 | 4.13 | 4.11 | 4.10 | 4.13 | 4.18 | 4.20 |
| TC1700084  | ACADVL   | 37 acyl-Coenzyme A dehydrogenase, very        | 6.75E-05 | 4    | 5.95 | 5.67 | 5.70 | 5.77 | 5.74 | 5.64 | 5.69 | 5.58 |
| TC1100297  | ACCS     | 84680 1-aminocyclopropane-1-carboxylate sy    | 1.97E-05 | 4    | 4.86 | 4.56 | 4.54 | 4.52 | 4.52 | 4.55 | 4.66 | 4.60 |
| TC1601181  | ACD      | 65057 adrenocortical dysplasia homolog (mol   | 8.12E-07 | 4    | 5.15 | 4.89 | 4.83 | 4.88 | 4.97 | 4.90 | 4.98 | 4.96 |
| TC1400714  | ACIN1    | 22985 apoptotic chromatin condensation ind    | 5.25E-05 | 4    | 6.48 | 5.89 | 5.93 | 6.08 | 6.08 | 6.03 | 6.19 | 6.07 |
| TC0X00342  | ACRC     | 93953 acidic repeat containing                | 1.40E-05 | 4    | 3.60 | 3.24 | 3.42 | 3.51 | 3.46 | 3.33 | 3.31 | 3.35 |
| TC1700589  | ACSF2    | 80221 acyl-CoA synthetase family member 2     | 0.000289 | 4    | 4.34 | 4.06 | 4.05 | 4.12 | 4.04 | 4.07 | 4.13 | 4.22 |
| TC2000261  | ACTR5    | 79913 ARP5 actin-related protein 5 homolog (  | 0.000104 | 4    | 3.91 | 3.61 | 3.62 | 3.64 | 3.60 | 3.58 | 3.62 | 3.62 |
| TC0800155  | ADAM28   | 10863 ADAM metallopeptidase domain 28         | 4.25E-27 | 4    | 5.49 | 3.64 | 3.15 | 3.25 | 3.10 | 3.48 | 3.77 | 4.17 |
| TC0101018  | ADAMTSL4 | 54507 ADAMTS-like 4 /// ADAMTS-like proteir   | 3.46E-08 | 4    | 5.52 | 5.19 | 5.05 | 5.13 | 5.16 | 5.19 | 5.14 | 5.19 |

|           |                                                                              |          |                                             |          |   |      |      |      |      |      |      |      |      |
|-----------|------------------------------------------------------------------------------|----------|---------------------------------------------|----------|---|------|------|------|------|------|------|------|------|
| TC1601269 | ADAT1                                                                        | 23536    | adenosine deaminase, tRNA-specific 1        | 2.70E-06 | 4 | 4.63 | 4.04 | 4.01 | 4.09 | 4.12 | 4.27 | 4.33 | 4.34 |
| TC0102965 | ADCY10 /// NP                                                                | 55811    | adenylate cyclase 10 (soluble) /// solub    | 0.000188 | 4 | 2.91 | 2.74 | 2.77 | 2.74 | 2.76 | 2.71 | 2.72 | 2.74 |
| TC1400745 | ADCY4                                                                        | 196883   | adenylate cyclase 4                         | 6.17E-19 | 4 | 5.15 | 4.74 | 4.66 | 4.59 | 4.64 | 4.65 | 4.61 | 4.62 |
| TC1501088 | ADPGK                                                                        | 83440    | ADP-dependent glucokinase /// ADP-de        | 4.50E-06 | 4 | 6.65 | 6.12 | 6.08 | 6.17 | 6.09 | 6.15 | 6.25 | 6.16 |
| TC0601149 | AGER                                                                         | 177      | advanced glycosylation end product-sp       | 4.54E-18 | 4 | 6.36 | 5.59 | 5.53 | 5.57 | 5.59 | 5.63 | 5.67 | 5.60 |
| TC0103426 | AHCTF1                                                                       | 25909    | AT hook containing transcription factor     | 3.52E-08 | 4 | 8.15 | 7.43 | 7.21 | 7.23 | 7.17 | 7.44 | 7.44 | 7.56 |
| TC0200274 | AHSA2                                                                        | 130872   | AHA1, activator of heat shock 90kDa pr      | 9.32E-18 | 4 | 5.61 | 4.23 | 4.30 | 4.39 | 4.29 | 4.32 | 4.44 | 4.29 |
| TC1901260 | AKAP8L                                                                       | 26993    | A kinase (PRKA) anchor protein 8-like       | 0.000141 | 4 | 6.97 | 6.61 | 6.59 | 6.79 | 6.82 | 6.79 | 6.82 | 6.74 |
| TC0901271 | AKNA                                                                         | 80709    | AT-hook transcription factor /// AT-hoc     | 6.85E-06 | 4 | 7.14 | 6.56 | 6.44 | 6.58 | 6.55 | 6.57 | 6.61 | 6.73 |
| TC1401158 | AKT1                                                                         | 207      | v-akt murine thymoma viral oncogene         | 1.49E-12 | 4 | 5.87 | 5.28 | 5.19 | 5.33 | 5.27 | 5.43 | 5.45 | 5.60 |
| TC2200772 | ALG12                                                                        | 79087    | asparagine-linked glycosylation 12 horr     | 5.22E-05 | 4 | 4.79 | 4.65 | 4.67 | 4.62 | 4.60 | 4.61 | 4.64 | 4.75 |
| TC0701511 | ALKBH4                                                                       | 54784    | alkB, alkylation repair homolog 4 (E. co    | 1.23E-08 | 4 | 5.38 | 4.81 | 4.72 | 4.84 | 4.80 | 4.84 | 4.78 | 4.82 |
| TC1901425 | ALKBH6                                                                       | 84964    | alkB, alkylation repair homolog 6 (E. co    | 6.52E-06 | 4 | 4.78 | 4.47 | 4.48 | 4.46 | 4.47 | 4.40 | 4.43 | 4.42 |
| TC0400467 | ALPK1                                                                        | 80216    | alpha-kinase 1 /// Alpha-protein kinase     | 4.45E-06 | 4 | 7.33 | 6.77 | 7.04 | 6.72 | 6.51 | 6.81 | 6.93 | 6.86 |
| TC0202225 | ALS2CR12                                                                     | 130540   | amyotrophic lateral sclerosis 2 (juvenil    | 2.00E-10 | 4 | 5.70 | 4.16 | 4.04 | 4.32 | 4.30 | 4.35 | 4.48 | 4.60 |
| TC0200996 | ALS2CR2                                                                      | 650168   | // amyotrophic lateral sclerosis 2 (juvenil | 0.000204 | 4 | 6.22 | 4.65 | 4.51 | 5.00 | 5.05 | 4.95 | 5.14 | 5.16 |
| TC1101873 | AMICA1                                                                       | 120425   | adhesion molecule, interacts with CXAI      | 6.27E-09 | 4 | 9.94 | 9.08 | 9.29 | 9.37 | 9.19 | 9.40 | 9.41 | 9.50 |
| TC0100806 | AMPD2                                                                        | 271      | adenosine monophosphate deaminase           | 8.00E-19 | 4 | 6.99 | 5.80 | 5.65 | 5.83 | 5.82 | 6.02 | 5.96 | 6.12 |
| TC0301207 | AMT                                                                          | 275      | aminomethyltransferase                      | 1.07E-10 | 4 | 4.57 | 4.22 | 4.23 | 4.24 | 4.23 | 4.29 | 4.25 | 4.28 |
| TC0801191 | ANGPT1                                                                       | 284      | angiopoietin 1                              | 2.43E-15 | 4 | 4.46 | 3.14 | 2.92 | 3.17 | 3.20 | 3.48 | 3.59 | 3.94 |
| TC1500408 | ANKDD1A                                                                      | 348094   | ankyrin repeat and death domain cont        | 6.74E-10 | 4 | 5.30 | 4.96 | 4.97 | 4.91 | 5.00 | 4.98 | 5.01 | 4.96 |
| TC1700930 | ANKFY1                                                                       | 51479    | ankyrin repeat and FYVE domain conta        | 4.56E-10 | 4 | 5.74 | 5.15 | 5.02 | 5.23 | 5.18 | 5.37 | 5.52 | 5.48 |
| TC0500530 | ANKHD1 /// EIF404734 // ANKHD1-EIF4EBP3 /// ankyrin repeat a                 | 138E-06  |                                             |          | 4 | 7.47 | 7.05 | 6.82 | 6.89 | 6.81 | 6.96 | 7.12 | 7.06 |
| TC1601346 | ANKRD11                                                                      | 653103   | // ankyrin repeat domain 11 /// Ankyrin r   | 0.000243 | 4 | 6.42 | 6.17 | 5.94 | 5.97 | 6.00 | 5.94 | 6.13 | 6.04 |
| TC1200689 | ANKRD13A                                                                     | 88455    | ankyrin repeat domain 13A /// Ankyrin       | 7.11E-09 | 4 | 8.81 | 8.16 | 8.10 | 8.29 | 8.19 | 8.32 | 8.37 | 8.47 |
| TC1100593 | ANKRD13D                                                                     | 338692   | ankyrin repeat domain 13 family, mem        | 8.66E-08 | 4 | 6.01 | 5.59 | 5.53 | 5.55 | 5.56 | 5.61 | 5.60 | 5.60 |
| TC0202198 | ANKRD44                                                                      | 91526    | ankyrin repeat domain 44 /// Ankyrin r      | 1.51E-12 | 4 | 7.54 | 6.51 | 6.48 | 6.78 | 6.52 | 6.80 | 6.83 | 6.99 |
| TC0201114 | ANKZF1                                                                       | 55139    | ankyrin repeat and zinc finger domain       | 5.71E-19 | 4 | 5.78 | 5.11 | 5.06 | 5.11 | 5.12 | 5.04 | 5.06 | 4.99 |
| TC1501234 | ANPEP                                                                        | 290      | alanyl (membrane) aminopeptidase (ar        | 1.59E-05 | 4 | 9.97 | 9.12 | 9.14 | 9.86 | 9.76 | 9.46 | 9.46 | 9.49 |
| TC0101022 | ANXA9                                                                        | 8416     | annexin A9 /// Annexin A9 (Annexin-9)       | 0.000505 | 4 | 4.36 | 4.16 | 4.20 | 4.12 | 4.18 | 4.18 | 4.06 | 4.18 |
| TC0701133 | AOAH                                                                         | 313      | acyloxyacyl hydrolase (neutrophil)          | 0.000124 | 4 | 8.30 | 7.60 | 7.58 | 8.08 | 7.83 | 7.77 | 7.87 | 7.90 |
| TC1700476 | AOC2                                                                         | 314      | amine oxidase, copper containing 2 (re      | 1.23E-19 | 4 | 6.19 | 4.22 | 4.02 | 4.28 | 4.47 | 4.52 | 4.57 | 4.69 |
| TC1700477 | AOC3                                                                         | 8639     | amine oxidase, copper containing 3 (va      | 6.49E-19 | 4 | 4.35 | 3.46 | 3.40 | 3.43 | 3.59 | 3.46 | 3.49 | 3.55 |
| TC1400731 | AP1G2 /// JPH <sup>2</sup> 84502 /// junctophilin 4 /// adaptor-related prot | 4.28E-15 |                                             |          | 4 | 5.44 | 4.95 | 4.93 | 4.89 | 4.93 | 4.92 | 4.94 | 4.87 |



|           |                |           |                                           |          |   |      |      |      |      |      |      |      |      |
|-----------|----------------|-----------|-------------------------------------------|----------|---|------|------|------|------|------|------|------|------|
| TC1701264 | AP1GBP1        | 11276     | AP1 gamma subunit binding protein 1 /     | 4.05E-06 | 4 | 6.88 | 6.48 | 6.32 | 6.43 | 6.26 | 6.45 | 6.55 | 6.60 |
| TC2200280 | APOBEC3A       | 200315    | apolipoprotein B mRNA editing enzyme      | 3.37E-15 | 4 | 9.22 | 7.77 | 7.37 | 7.46 | 7.45 | 7.53 | 7.63 | 7.65 |
| TC2200628 | APOL2          | 23780     | apolipoprotein L, 2                       | 2.11E-08 | 4 | 6.54 | 5.66 | 5.43 | 5.70 | 5.50 | 5.82 | 5.95 | 6.20 |
| TC1201525 | APPL2          | 55198     | adaptor protein, phosphotyrosine inter    | 1.38E-10 | 4 | 6.79 | 6.03 | 6.11 | 5.95 | 5.96 | 6.06 | 6.06 | 6.07 |
| TC0X01374 | ARD1A          | 8260      | ARD1 homolog A, N-acetyltransferase (     | 2.99E-05 | 4 | 5.29 | 4.97 | 5.03 | 5.09 | 5.20 | 5.18 | 5.12 | 5.14 |
| TC1300641 | ARGLU1 /// U4  | 55082     | arginine and glutamate rich 1 /// UPFO    | 2.26E-08 | 4 | 7.57 | 6.68 | 6.52 | 6.53 | 6.61 | 6.61 | 6.82 | 6.63 |
| TC0200311 | ARHGAP25       | 9938      | Rho GTPase activating protein 25          | 6.09E-12 | 4 | 9.53 | 8.46 | 8.58 | 8.85 | 8.75 | 9.01 | 8.95 | 9.15 |
| TC0500567 | ARHGAP26       | 23092     | Rho GTPase activating protein 26 /// Rl   | 2.10E-06 | 4 | 9.62 | 9.21 | 9.18 | 9.11 | 8.94 | 9.10 | 9.08 | 9.14 |
| TC1701444 | ARHGAP27       | 201176    | Rho GTPase activating protein 27 /// Rl   | 0.0003   | 4 | 6.06 | 5.60 | 5.62 | 5.65 | 5.65 | 5.66 | 5.63 | 5.62 |
| TC1201320 | ARHGAP9        | 64333     | Rho GTPase activating protein 9 /// Rhc   | 2.68E-20 | 4 | 8.03 | 6.99 | 6.97 | 7.13 | 7.16 | 7.18 | 7.16 | 7.14 |
| TC1900564 | ARHGEF1        | 9138      | Rho guanine nucleotide exchange factc     | 9.79E-14 | 4 | 6.38 | 5.81 | 5.71 | 5.78 | 5.83 | 5.74 | 5.74 | 5.71 |
| TC1900126 | ARHGEF18       | 23370     | rho/rac guanine nucleotide exchange fi    | 2.22E-07 | 4 | 6.38 | 5.89 | 5.79 | 5.93 | 5.95 | 6.06 | 6.11 | 6.20 |
| TC1400264 | ARID4A         | 5926      | AT rich interactive domain 4A (RBP1-lik   | 0.000642 | 4 | 8.57 | 8.48 | 8.27 | 8.22 | 8.13 | 8.36 | 8.49 | 8.49 |
| TC0103369 | ARID4B         | 51742     | AT rich interactive domain 4B (RBP1-lik   | 0.000959 | 4 | 8.77 | 8.69 | 8.48 | 8.43 | 8.35 | 8.55 | 8.71 | 8.64 |
| TC1701783 | ARL16          | 339231    | ADP-ribosylation factor-like 16           | 7.07E-05 | 4 | 4.48 | 4.20 | 4.21 | 4.20 | 4.23 | 4.21 | 4.22 | 4.17 |
| TC0600624 | ARMC2          | 84071     | armadillo repeat containing 2 /// Arma    | 3.31E-07 | 4 | 3.61 | 3.13 | 3.36 | 3.33 | 3.33 | 3.19 | 3.26 | 3.26 |
| TC1100187 | ARNTL          | 406       | aryl hydrocarbon receptor nuclear tran    | 2.51E-08 | 4 | 6.47 | 5.86 | 5.87 | 5.91 | 5.76 | 6.04 | 6.05 | 6.14 |
| TC0501142 | ARRDC3         | 57561     | arrestin domain containing 3              | 1.32E-12 | 4 | 9.60 | 8.17 | 8.33 | 8.43 | 8.18 | 8.99 | 8.78 | 9.28 |
| TC0700556 | ARS2 /// ARS2_ | 51593     | arsenate resistance protein 2 /// Arsen   | 0.0002   | 4 | 5.45 | 5.20 | 4.96 | 5.05 | 5.21 | 5.18 | 5.24 | 5.13 |
| TC1700713 | ARSG           | 22901     | arylsulfatase G                           | 1.58E-10 | 4 | 6.30 | 5.48 | 5.47 | 5.61 | 5.59 | 5.65 | 5.67 | 5.67 |
| TC2200571 | ASCC2          | 84164     | activating signal cointegrator 1 comple   | 1.95E-07 | 4 | 5.61 | 5.07 | 4.93 | 5.18 | 5.19 | 5.19 | 5.31 | 5.27 |
| TC1901237 | ASF1B          | 55723     | ASF1 anti-silencing function 1 homolog    | 5.82E-10 | 4 | 5.14 | 4.20 | 4.17 | 4.37 | 4.61 | 4.68 | 4.66 | 4.71 |
| TC0102833 | ASH1L          | 55870     | ash1 (absent, small, or homeotic)-like (  | 0.000667 | 4 | 6.81 | 6.42 | 6.26 | 6.28 | 6.24 | 6.34 | 6.49 | 6.45 |
| TC1600323 | ASPHD1         | 253982    | aspartate beta-hydroxylase domain cor     | 1.96E-05 | 4 | 4.63 | 4.32 | 4.35 | 4.29 | 4.34 | 4.31 | 4.28 | 4.38 |
| TC2000181 | ASXL1          | 171023    | additional sex combs like 1 (Drosophila   | 0.000173 | 4 | 5.36 | 5.16 | 5.02 | 5.02 | 5.09 | 5.05 | 5.21 | 5.16 |
| TC2200290 | ATF4           | 730136 // | activating transcription factor 4 (tax-re | 5.18E-05 | 4 | 7.62 | 7.03 | 6.73 | 6.83 | 7.08 | 7.14 | 7.13 | 7.04 |
| TC1200163 | ATF7IP         | 55729     | activating transcription factor 7 interac | 1.01E-06 | 4 | 7.65 | 7.07 | 7.18 | 7.29 | 7.25 | 7.29 | 7.31 | 7.41 |
| TC0201196 | ATG16L1        | 55054     | ATG16 autophagy related 16-like 1 (S. c   | 5.45E-08 | 4 | 4.90 | 4.39 | 4.60 | 4.68 | 4.58 | 4.63 | 4.67 | 4.57 |
| TC1100651 | ATG16L2        | 89849     | ATG16 autophagy related 16-like 2 (S. c   | 5.20E-40 | 4 | 8.01 | 5.99 | 5.85 | 6.03 | 5.99 | 6.10 | 6.17 | 6.21 |
| TC1101528 | ATG2A          | 23130     | ATG2 autophagy related 2 homolog A (      | 1.26E-11 | 4 | 5.43 | 5.22 | 4.90 | 4.88 | 4.98 | 5.07 | 4.98 | 5.14 |
| TC1401109 | ATG2B          | 55102     | ATG2 autophagy related 2 homolog B (      | 2.19E-05 | 4 | 5.41 | 4.99 | 4.91 | 4.99 | 4.86 | 4.90 | 5.06 | 4.94 |
| TC1401108 | ATG2B          | 55102     | ATG2 autophagy related 2 homolog B (      | 2.23E-05 | 4 | 5.51 | 4.92 | 4.91 | 4.92 | 4.88 | 4.90 | 5.02 | 4.90 |
| TC1100008 | ATHL1          | 80162     | ATH1, acid trehalase-like 1 (yeast) /// A | 2.58E-42 | 4 | 6.93 | 5.51 | 5.54 | 5.57 | 5.55 | 5.58 | 5.56 | 5.59 |
| TC1201437 | ATP2B1         | 490       | ATPase, Ca++ transporting, plasma mer     | 3.28E-15 | 4 | 8.00 | 6.87 | 6.43 | 6.51 | 6.39 | 7.10 | 7.24 | 7.43 |

|           |                                                                   |                                                  |          |      |      |      |      |      |      |      |      |      |
|-----------|-------------------------------------------------------------------|--------------------------------------------------|----------|------|------|------|------|------|------|------|------|------|
| TC1700460 | ATP6V0A1                                                          | 535 ATPase, H+ transporting, lysosomal V0        | 1.60E-06 | 4    | 7.14 | 6.80 | 6.57 | 6.56 | 6.53 | 6.62 | 6.62 | 6.66 |
| TC0100477 | ATP6V0B                                                           | 533 ATPase, H+ transporting, lysosomal 21k       | 4.62E-05 | 4    | 7.21 | 6.54 | 6.41 | 6.59 | 6.60 | 6.75 | 6.53 | 6.73 |
| TC0300507 | ATP6V1A                                                           | 523 ATPase, H+ transporting, lysosomal 70k       | 2.83E-06 | 4    | 8.09 | 7.43 | 7.71 | 7.85 | 7.68 | 7.79 | 7.77 | 7.87 |
| TC0800121 | ATP6V1B2                                                          | 526 ATPase, H+ transporting, lysosomal 56/       | 1.44E-08 | 4    | 9.13 | 8.15 | 8.40 | 8.67 | 8.45 | 8.58 | 8.50 | 8.68 |
| TC0300349 | ATXN7                                                             | 6314 ataxin 7                                    | 1.40E-08 | 4    | 8.14 | 7.92 | 7.60 | 7.71 | 7.60 | 7.82 | 7.85 | 8.06 |
| TC0201642 | AUP1                                                              | 550 ancient ubiquitous protein 1 /// Ancien      | 4.95E-10 | 4    | 5.83 | 5.23 | 5.25 | 5.15 | 5.19 | 5.31 | 5.41 | 5.28 |
| TC1201330 | AVIL                                                              | 10677 advillin                                   | 1.21E-26 | 4    | 5.82 | 4.21 | 4.10 | 4.39 | 4.36 | 4.51 | 4.56 | 4.56 |
| TC1701812 | B3GNTL1                                                           | 146712 UDP-GlcNAc:betaGal beta-1,3-N-acetyl      | 9.93E-06 | 4    | 5.20 | 4.88 | 4.89 | 4.77 | 4.83 | 4.87 | 4.77 | 4.80 |
| TC2100059 | BACH1 /// C21c                                                    | 571 BTB and CNC homology 1, basic leucine        | 1.58E-06 | 4    | 6.81 | 6.25 | 6.33 | 6.47 | 6.34 | 6.51 | 6.44 | 6.55 |
| TC2100209 | BAGE2 /// BAG 85319 /// B melanoma antigen family, member 2       | 3.09E-09                                         | 4        | 4.87 | 4.65 | 4.59 | 4.50 | 4.47 | 4.56 | 4.60 | 4.58 | 4.58 |
| TC1600657 | BANP                                                              | 648196 // BTG3 associated nuclear protein /// BT | 1.46E-15 | 4    | 5.98 | 5.18 | 5.21 | 5.35 | 5.29 | 5.36 | 5.41 | 5.52 |
| TC0601121 | BAT1 /// ATP6\ 7919 /// ε HLA-B associated transcript 1 /// ATPas | 3.78E-09                                         | 4        | 6.01 | 5.53 | 5.51 | 5.52 | 5.59 | 5.53 | 5.53 | 5.53 | 5.43 |
| TC0600271 | BAT2                                                              | 7916 HLA-B associated transcript 2 /// HLA-B     | 0.000105 | 4    | 6.16 | 5.97 | 5.78 | 5.86 | 5.86 | 5.78 | 5.80 | 5.80 |
| TC0101283 | BAT2D1                                                            | 23215 BAT2 domain containing 1 /// HBxAg tr      | 3.35E-05 | 4    | 8.70 | 8.24 | 7.93 | 7.98 | 7.93 | 8.04 | 8.33 | 8.20 |
| TC0601125 | BAT3                                                              | 7917 HLA-B associated transcript 3 /// Large     | 4.57E-07 | 4    | 5.64 | 5.36 | 5.39 | 5.33 | 5.36 | 5.35 | 5.33 | 5.34 |
| TC1201300 | BAZ2A                                                             | 11176 bromodomain adjacent to zinc finger d      | 1.75E-06 | 4    | 7.33 | 6.92 | 6.52 | 6.64 | 6.61 | 6.73 | 6.78 | 6.89 |
| TC0202036 | BAZ2B                                                             | 29994 bromodomain adjacent to zinc finger d      | 3.47E-11 | 4    | 9.00 | 8.11 | 7.69 | 7.92 | 7.95 | 8.12 | 8.27 | 8.29 |
| TC1500463 | BBS4                                                              | 585 Bardet-Biedl syndrome 4                      | 6.22E-06 | 4    | 3.40 | 3.03 | 3.09 | 3.10 | 2.97 | 3.05 | 3.15 | 3.13 |
| TC2000843 | BCAS1                                                             | 8537 breast carcinoma amplified sequence 1       | 2.50E-05 | 4    | 3.59 | 3.38 | 3.34 | 3.30 | 3.35 | 3.35 | 3.35 | 3.37 |
| TC0601629 | BCLAF1                                                            | 9774 BCL2-associated transcription factor 1      | 3.79E-08 | 4    | 7.91 | 7.50 | 7.24 | 7.28 | 7.24 | 7.42 | 7.60 | 7.58 |
| TC0201103 | BCS1L                                                             | 617 BCS1-like (yeast)                            | 2.98E-06 | 4    | 3.89 | 3.60 | 3.59 | 3.59 | 3.64 | 3.59 | 3.69 | 3.59 |
| TC1100467 | BEST1                                                             | 7439 bestrophin 1 /// Bestrophin-1 (Vitellifoi   | 6.25E-07 | 4    | 6.06 | 5.66 | 5.38 | 5.35 | 5.28 | 5.63 | 5.42 | 5.62 |
| TC0200160 | BIRC6                                                             | 57448 baculoviral IAP repeat-containing 6 (ap    | 2.46E-05 | 4    | 6.24 | 5.88 | 5.63 | 5.70 | 5.69 | 5.77 | 5.87 | 5.81 |
| TC0400343 | BMP2K                                                             | 55589 BMP2 inducible kinase /// BMP-2-induc      | 7.79E-06 | 4    | 7.18 | 6.79 | 6.79 | 6.86 | 6.56 | 7.00 | 6.98 | 7.06 |
| TC0800164 | BNIP3L                                                            | 665 BCL2/adenovirus E1B 19kDa interactin         | 2.68E-07 | 4    | 9.30 | 8.61 | 8.26 | 8.53 | 8.52 | 8.58 | 8.60 | 8.65 |
| TC0101024 | BNIPL                                                             | 651044 // BCL2/adenovirus E1B 19kD interacting   | 8.08E-15 | 4    | 4.29 | 3.67 | 3.71 | 3.76 | 3.77 | 3.78 | 3.74 | 3.75 |
| TC1600981 | BOLA2B /// BO 654483 // bolA homolog 2B (E. coli) /// bolA hom    | 9.36E-06                                         | 4        | 7.30 | 6.97 | 6.91 | 6.87 | 6.94 | 7.00 | 7.04 | 6.94 | 6.94 |
| TC1901258 | BRD4                                                              | 23476 bromodomain containing 4 /// Bromod        | 6.39E-05 | 4    | 6.61 | 6.37 | 6.16 | 6.29 | 6.29 | 6.28 | 6.41 | 6.43 |
| TC0501319 | BRD8                                                              | 10902 bromodomain containing 8                   | 6.74E-10 | 4    | 6.42 | 5.87 | 5.84 | 5.72 | 5.63 | 5.84 | 5.98 | 5.97 |
| TC0X01062 | BRWD3                                                             | 254065 bromodomain and WD repeat domain          | 2.14E-06 | 4    | 7.18 | 6.96 | 6.80 | 6.68 | 6.51 | 6.75 | 6.79 | 6.84 |
| TC1000442 | BTA1                                                              | 9044 BTA1 RNA polymerase II, B-TFIID trans       | 0.000602 | 4    | 5.41 | 5.12 | 4.94 | 5.05 | 4.95 | 5.02 | 5.12 | 5.01 |
| TC1200666 | BTBD11                                                            | 121551 BTB (POZ) domain containing 11            | 6.81E-13 | 4    | 4.20 | 3.90 | 3.92 | 3.86 | 3.91 | 3.97 | 3.96 | 4.08 |
| TC0600163 | BTN2A1                                                            | 11120 butyrophilin, subfamily 2, member A1       | 1.32E-15 | 4    | 7.71 | 6.61 | 6.71 | 6.84 | 6.81 | 7.05 | 7.19 | 7.25 |
| TC0600159 | BTN2A2                                                            | 10385 butyrophilin, subfamily 2, member A2       | 7.44E-19 | 4    | 4.86 | 4.03 | 4.00 | 4.05 | 4.02 | 4.23 | 4.51 | 4.58 |

|           |                |        |                                           |          |   |      |      |      |      |      |      |      |      |
|-----------|----------------|--------|-------------------------------------------|----------|---|------|------|------|------|------|------|------|------|
| TC0600161 | BTN2A3         | 54718  | butyrophilin, subfamily 2, member A3      | 6.78E-08 | 4 | 3.88 | 3.54 | 3.64 | 3.55 | 3.56 | 3.67 | 3.63 | 3.70 |
| TC0600160 | BTN3A1         | 11119  | butyrophilin, subfamily 3, member A1      | 2.34E-20 | 4 | 7.44 | 5.41 | 5.21 | 5.63 | 5.38 | 6.24 | 6.50 | 6.85 |
| TC0600162 | BTN3A3         | 10384  | butyrophilin, subfamily 3, member A3      | 4.91E-21 | 4 | 6.78 | 4.66 | 4.53 | 5.03 | 4.83 | 5.49 | 5.88 | 6.04 |
| TC1000674 | C10orf137      | 26098  | chromosome 10 open reading frame 137      | 1.81E-07 | 4 | 4.85 | 4.30 | 4.49 | 4.56 | 4.56 | 4.59 | 4.67 | 4.62 |
| TC1000763 | C10orf31       | ---    | Putative uncharacterized protein C10orf31 | 1.68E-16 | 4 | 7.83 | 6.31 | 6.11 | 6.25 | 6.13 | 6.43 | 6.39 | 6.50 |
| TC1100682 | C11orf30       | 56946  | chromosome 11 open reading frame 30       | 8.97E-05 | 4 | 6.38 | 6.21 | 6.12 | 6.17 | 6.05 | 6.20 | 6.29 | 6.38 |
| TC1101836 | C11orf34       | 349633 | chromosome 11 open reading frame 34       | 1.63E-05 | 4 | 4.30 | 3.77 | 3.54 | 3.53 | 3.48 | 3.55 | 3.65 | 3.82 |
| TC1201438 | C12orf12       | 196477 | chromosome 12 open reading frame 12       | 0.000676 | 4 | 4.04 | 3.67 | 3.79 | 3.70 | 3.75 | 3.72 | 3.58 | 3.70 |
| TC1200238 | C12orf35       | 55196  | chromosome 12 open reading frame 35       | 9.16E-13 | 4 | 9.80 | 9.16 | 8.97 | 8.98 | 9.02 | 9.32 | 9.45 | 9.54 |
| TC1201579 | C12orf51       | 283450 | chromosome 12 open reading frame 51       | 1.77E-06 | 4 | 5.97 | 5.31 | 5.09 | 5.32 | 5.32 | 5.31 | 5.47 | 5.33 |
| TC1200607 | C12orf55       | 144535 | chromosome 12 open reading frame 55       | 0.00097  | 4 | 2.49 | 2.25 | 2.27 | 2.26 | 2.29 | 2.32 | 2.34 | 2.39 |
| TC1400841 | C14orf138      | 79609  | chromosome 14 open reading frame 138      | 3.26E-05 | 4 | 5.54 | 4.91 | 4.74 | 4.81 | 4.72 | 4.71 | 4.75 | 4.64 |
| TC1400443 | C14orf159      | 80017  | chromosome 14 open reading frame 159      | 8.20E-29 | 4 | 7.49 | 5.49 | 5.32 | 5.62 | 5.69 | 6.15 | 6.32 | 6.44 |
| TC1500487 | C15orf39       | 56905  | chromosome 15 open reading frame 39       | 7.19E-06 | 4 | 6.58 | 6.26 | 6.10 | 6.25 | 6.17 | 6.35 | 6.28 | 6.47 |
| TC1500299 | C15orf43       | 145645 | chromosome 15 open reading frame 43       | 0.000216 | 4 | 2.80 | 2.45 | 2.50 | 2.56 | 2.51 | 2.50 | 2.55 | 2.66 |
| TC1600934 | C16orf65       | 255762 | chromosome 16 open reading frame 65       | 1.28E-06 | 4 | 3.32 | 2.98 | 3.05 | 2.96 | 3.01 | 2.99 | 3.00 | 3.05 |
| TC1701773 | C17orf56       | 146705 | chromosome 17 open reading frame 56       | 1.09E-07 | 4 | 4.98 | 4.66 | 4.70 | 4.68 | 4.72 | 4.71 | 4.64 | 4.66 |
| TC1701009 | C17orf68       | 80169  | chromosome 17 open reading frame 68       | 8.60E-21 | 4 | 6.32 | 5.65 | 5.51 | 5.53 | 5.52 | 5.59 | 5.62 | 5.63 |
| TC1800418 | C18orf37       | 125476 | chromosome 18 open reading frame 37       | 3.05E-06 | 4 | 5.18 | 5.04 | 4.92 | 4.93 | 4.92 | 5.02 | 5.12 | 5.12 |
| TC1901010 | C19orf34       | 255193 | chromosome 19 open reading frame 34       | 0.000682 | 4 | 4.95 | 4.62 | 4.60 | 4.49 | 4.60 | 4.59 | 4.56 | 4.57 |
| TC1900322 | C19orf50       | 79036  | chromosome 19 open reading frame 50       | 2.64E-06 | 4 | 6.02 | 5.57 | 5.60 | 5.66 | 5.74 | 5.68 | 5.69 | 5.75 |
| TC1900457 | C19orf55       | 148137 | chromosome 19 open reading frame 55       | 0.000679 | 4 | 5.17 | 5.06 | 5.02 | 5.01 | 4.98 | 5.06 | 5.04 | 5.03 |
| TC1900990 | C19orf6        | 91304  | chromosome 19 open reading frame 6        | 0.000288 | 4 | 5.99 | 5.75 | 5.72 | 5.82 | 5.82 | 5.82 | 5.74 | 5.76 |
| TC0100397 | C1orf113 /// Q | 79729  | chromosome 1 open reading frame 113       | 2.59E-13 | 4 | 4.96 | 4.64 | 4.55 | 4.54 | 4.58 | 4.61 | 4.55 | 4.63 |
| TC0100257 | C1orf128       | 57095  | chromosome 1 open reading frame 128       | 2.16E-06 | 4 | 5.61 | 4.88 | 4.88 | 4.95 | 5.04 | 5.12 | 5.16 | 5.16 |
| TC0103194 | C1orf132       | ---    | Uncharacterized protein C1orf132 (Fra)    | 2.23E-13 | 4 | 5.67 | 4.95 | 4.75 | 4.88 | 4.82 | 5.05 | 5.05 | 5.15 |
| TC0102720 | C1orf138       | ---    | Uncharacterized protein C1orf138. [Sol    | 1.51E-07 | 4 | 5.64 | 4.88 | 4.66 | 4.96 | 4.92 | 5.03 | 4.98 | 5.10 |
| TC0100305 | C1orf160       | 84065  | chromosome 1 open reading frame 160       | 5.97E-07 | 4 | 4.58 | 4.32 | 4.35 | 4.29 | 4.33 | 4.37 | 4.37 | 4.41 |
| TC0100869 | C1orf161       | 126868 | chromosome 1 open reading frame 161       | 0.000144 | 4 | 4.02 | 3.57 | 3.56 | 3.69 | 3.60 | 3.61 | 3.60 | 3.61 |
| TC0102546 | C1orf183       | 55924  | chromosome 1 open reading frame 183       | 8.28E-06 | 4 | 6.96 | 6.38 | 6.47 | 6.50 | 6.47 | 6.54 | 6.53 | 6.64 |
| TC0102810 | C1orf189       | 388701 | chromosome 1 open reading frame 189       | 0.000311 | 4 | 3.04 | 2.56 | 2.71 | 2.61 | 2.63 | 2.62 | 2.69 | 2.72 |
| TC0101841 | C1orf200       | 644997 | chromosome 1 open reading frame 200       | 7.37E-05 | 4 | 5.68 | 4.93 | 4.81 | 4.88 | 4.87 | 4.70 | 4.71 | 4.80 |
| TC0101025 | C1orf56        | 54964  | chromosome 1 open reading frame 56        | 3.63E-07 | 4 | 6.83 | 6.33 | 6.37 | 6.43 | 6.42 | 6.49 | 6.46 | 6.47 |
| TC0102000 | C1orf63        | 57035  | chromosome 1 open reading frame 63        | 3.91E-08 | 4 | 6.67 | 5.66 | 6.13 | 6.23 | 6.12 | 6.15 | 6.02 | 6.11 |

|           |           |               |                                           |          |   |       |      |      |      |      |      |      |      |
|-----------|-----------|---------------|-------------------------------------------|----------|---|-------|------|------|------|------|------|------|------|
| TC0101083 | C1orf77   | 26097         | chromosome 1 open reading frame 77        | 6.23E-11 | 4 | 6.64  | 6.03 | 6.18 | 6.19 | 6.08 | 6.20 | 6.36 | 6.33 |
| TC0100468 | C1orf84   | /// KIA149469 | // chromosome 1 open reading frame 84     | 1.26E-14 | 4 | 4.75  | 4.49 | 4.42 | 4.42 | 4.44 | 4.46 | 4.42 | 4.44 |
| TC0103106 | C1orf98   | ---           | ---                                       | 3.82E-06 | 4 | 4.83  | 3.92 | 4.10 | 4.40 | 4.26 | 4.20 | 4.20 | 4.04 |
| TC0400111 | C1QTNF7   | 114905        | C1q and tumor necrosis factor related     | 7.81E-05 | 4 | 3.12  | 2.67 | 2.66 | 2.63 | 2.69 | 2.79 | 2.77 | 2.67 |
| TC1200919 | C1R       | 727728        | // complement component 1, r subcomp      | 9.25E-05 | 4 | 3.75  | 3.53 | 3.48 | 3.47 | 3.50 | 3.50 | 3.49 | 3.51 |
| TC2000396 | C20orf107 | /// (388799   | // chromosome 20 open reading frame 10    | 6.11E-05 | 4 | 5.05  | 4.71 | 4.67 | 4.60 | 4.65 | 4.73 | 4.72 | 4.63 |
| TC2000121 | C20orf19  | 55857         | chromosome 20 open reading frame 19       | 3.01E-18 | 4 | 6.26  | 5.17 | 5.09 | 5.24 | 5.12 | 5.40 | 5.61 | 5.69 |
| TC2000421 | C20orf197 | 284756        | chromosome 20 open reading frame 19       | 2.55E-09 | 4 | 4.92  | 4.59 | 4.42 | 4.28 | 4.36 | 4.52 | 4.54 | 4.53 |
| TC2200603 | C22orf30  | 253143        | chromosome 22 open reading frame 30       | 6.06E-05 | 4 | 6.34  | 5.80 | 5.70 | 5.84 | 5.76 | 5.82 | 5.98 | 5.98 |
| TC2200770 | C22orf34  | ---           | Novel protein (LOC348645). [Source:Ur     | 5.57E-05 | 4 | 4.89  | 4.66 | 4.69 | 4.63 | 4.63 | 4.65 | 4.58 | 4.68 |
| TC1100913 | C2CD2L    | 9854          | C2CD2-like                                | 6.81E-13 | 4 | 5.24  | 4.71 | 4.63 | 4.78 | 4.85 | 4.88 | 4.85 | 4.83 |
| TC1101653 | C2CD3     | /// Q9Y       | 26005 C2 calcium-dependent domain contain | 5.11E-18 | 4 | 5.45  | 4.72 | 4.62 | 4.75 | 4.64 | 4.80 | 4.97 | 4.96 |
| TC0200530 | C2orf29   | 55571         | chromosome 2 open reading frame 29        | 0.000185 | 4 | 7.70  | 7.38 | 7.15 | 7.34 | 7.31 | 7.40 | 7.37 | 7.39 |
| TC0201293 | C2orf46   | ---           | Putative uncharacterized protein C2orf    | 8.97E-13 | 4 | 3.88  | 3.16 | 3.17 | 3.38 | 3.25 | 3.35 | 3.58 | 3.61 |
| TC0301655 | C3orf16   | 389161        | chromosome 3 open reading frame 16        | 5.65E-23 | 4 | 4.26  | 3.07 | 3.02 | 2.99 | 3.03 | 3.22 | 3.36 | 3.63 |
| TC0300051 | C3orf42   | ---           | Putative uncharacterized protein C3orf    | 7.65E-06 | 4 | 6.07  | 5.19 | 4.99 | 5.28 | 5.31 | 5.46 | 5.41 | 5.40 |
| TC0301204 | C3orf62   | /// USI375341 | // chromosome 3 open reading frame 62     | 1.97E-14 | 4 | 8.90  | 7.86 | 7.84 | 7.98 | 7.91 | 8.09 | 8.15 | 8.23 |
| TC0400030 | C4orf8    | 8603          | chromosome 4 open reading frame 8 /,      | 8.95E-08 | 4 | 6.16  | 5.77 | 5.68 | 5.76 | 5.68 | 5.71 | 5.80 | 5.83 |
| TC0600594 | C6orf112  | ---           | OTTHUMP00000016912. [Source:Unipr         | 0.00057  | 4 | 2.57  | 2.34 | 2.41 | 2.44 | 2.28 | 2.26 | 2.33 | 2.38 |
| TC0600545 | C6orf163  | ---           | Uncharacterized protein C6orf163. [Sou    | 1.12E-05 | 4 | 3.76  | 3.19 | 3.27 | 3.20 | 3.49 | 3.54 | 3.62 | 3.40 |
| TC0600546 | C6orf164  | ---           | Uncharacterized protein C6orf164. [Sou    | 1.22E-05 | 4 | 4.09  | 3.72 | 3.55 | 3.58 | 3.63 | 3.63 | 3.73 | 3.70 |
| TC0600623 | C6orf181  | ---           | OTTHUMP00000016945. [Source:Unipr         | 0.000816 | 4 | 3.98  | 3.77 | 3.71 | 3.66 | 3.68 | 3.76 | 3.74 | 3.79 |
| TC0600281 | C6orf48   | /// SN        | 50854 chromosome 6 open reading frame 48  | 3.80E-05 | 4 | 4.72  | 4.38 | 4.42 | 4.46 | 4.60 | 4.49 | 4.50 | 4.41 |
| TC0601003 | C6orf62   | 81688         | chromosome 6 open reading frame 62        | 4.41E-05 | 4 | 8.98  | 8.66 | 8.52 | 8.67 | 8.61 | 8.69 | 8.80 | 8.70 |
| TC0701473 | C7orf43   | 55262         | chromosome 7 open reading frame 43        | 8.18E-15 | 4 | 7.07  | 6.02 | 5.92 | 6.14 | 6.23 | 6.43 | 6.28 | 6.40 |
| TC0701160 | C7orf44   | 55744         | chromosome 7 open reading frame 44        | 2.16E-10 | 4 | 6.66  | 6.39 | 6.08 | 5.98 | 6.15 | 6.38 | 6.49 | 6.49 |
| TC0700620 | C7orf53   | 286006        | chromosome 7 open reading frame 53        | 0.000764 | 4 | 5.02  | 4.11 | 4.23 | 4.70 | 4.79 | 4.71 | 4.70 | 4.37 |
| TC0700666 | C7orf54   | 27099         | chromosome 7 open reading frame 54        | 2.34E-05 | 4 | 5.82  | 4.40 | 4.71 | 4.83 | 4.78 | 4.91 | 5.18 | 4.93 |
| TC0100914 | C9orf131  | 138724        | chromosome 9 open reading frame 131       | 5.39E-12 | 4 | 10.35 | 9.00 | 8.96 | 9.10 | 9.10 | 9.07 | 9.33 | 9.08 |
| TC0900154 | C9orf131  | 138724        | chromosome 9 open reading frame 131       | 3.57E-05 | 4 | 5.82  | 5.54 | 5.49 | 5.36 | 5.34 | 5.47 | 5.44 | 5.53 |
| TC0901181 | C9orf156  | 51531         | chromosome 9 open reading frame 156       | 3.90E-05 | 4 | 5.38  | 5.17 | 5.06 | 5.04 | 5.08 | 5.19 | 5.26 | 5.31 |
| TC0901112 | C9orf164  | 349236        | chromosome 9 open reading frame 164       | 3.57E-08 | 4 | 5.62  | 4.95 | 4.94 | 5.11 | 5.07 | 5.14 | 5.19 | 5.25 |
| TC0900773 | C9orf38   | ---           | Uncharacterized protein C9orf38. [Sou     | 1.31E-05 | 4 | 3.25  | 2.72 | 2.71 | 2.73 | 2.81 | 2.76 | 3.01 | 3.05 |
| TC0101009 | CA14      | 23632         | carbonic anhydrase XIV                    | 8.33E-12 | 4 | 3.82  | 3.34 | 3.34 | 3.37 | 3.29 | 3.36 | 3.37 | 3.37 |

|           |                  |                                                                      |          |   |      |      |      |      |      |      |      |      |
|-----------|------------------|----------------------------------------------------------------------|----------|---|------|------|------|------|------|------|------|------|
| TC0101570 | CABC1            | 56997 chaperone, ABC1 activity of bc1 complex                        | 2.68E-06 | 4 | 5.28 | 5.01 | 5.05 | 5.12 | 5.05 | 5.08 | 5.07 | 5.11 |
| TC0202006 | CACNB4           | 785 calcium channel, voltage-dependent, beta                         | 3.12E-25 | 4 | 4.61 | 3.33 | 3.21 | 3.27 | 3.26 | 3.40 | 3.37 | 3.66 |
| TC0801106 | CALB1            | 793 calbindin 1, 28kDa                                               | 0.000235 | 4 | 3.05 | 2.76 | 2.80 | 2.90 | 2.84 | 2.85 | 2.86 | 2.81 |
| TC1201256 | CALCOCO1         | 57658 calcium binding and coiled-coil domain                         | 1.15E-13 | 4 | 7.13 | 6.32 | 6.08 | 6.21 | 6.07 | 6.24 | 6.28 | 6.45 |
| TC1700926 | CAMKK1           | 84254 calcium/calmodulin-dependent protein kinase                    | 0.000449 | 4 | 4.20 | 3.88 | 3.97 | 3.90 | 3.89 | 3.92 | 3.88 | 3.90 |
| TC0300080 | CAPN7            | 23473 calpain 7                                                      | 6.29E-07 | 4 | 5.87 | 5.50 | 5.28 | 5.34 | 5.34 | 5.40 | 5.60 | 5.50 |
| TC1201076 | CAPRIN2          | 65981 caprin family member 2                                         | 6.26E-07 | 4 | 4.41 | 3.75 | 3.80 | 3.88 | 3.79 | 3.81 | 3.97 | 3.91 |
| TC1901651 | CARD8            | 22900 caspase recruitment domain family, member                      | 9.77E-09 | 4 | 7.69 | 6.96 | 7.17 | 7.09 | 7.00 | 7.21 | 7.21 | 7.21 |
| TC0200994 | CASP8            | 841 caspase 8, apoptosis-related cysteine protease                   | 4.74E-13 | 4 | 7.47 | 6.76 | 6.77 | 6.77 | 6.67 | 6.96 | 7.00 | 7.12 |
| TC2000392 | CASS4 /// C20c   | 57091 Cas scaffolding protein family member                          | 1.45E-13 | 4 | 7.48 | 6.28 | 5.95 | 5.89 | 5.86 | 6.64 | 6.62 | 7.08 |
| TC2000200 | CBFA2T2          | 9139 core-binding factor, runt domain, alpha                         | 0.000875 | 4 | 4.89 | 4.74 | 4.72 | 4.78 | 4.83 | 4.79 | 4.77 | 4.75 |
| TC0900996 | CBWD6            | 644019 COBW domain containing 6 /// COBW domain                      | 1.04E-14 | 4 | 5.89 | 5.03 | 5.12 | 5.13 | 5.18 | 5.34 | 5.51 | 5.45 |
| TC2200676 | CBX7             | 23492 chromobox homolog 7                                            | 1.80E-12 | 4 | 5.56 | 4.99 | 4.95 | 5.00 | 4.95 | 5.08 | 5.05 | 5.19 |
| TC0901371 | CCBL1            | 883 cysteine conjugate-beta lyase, cytoplasmic                       | 2.40E-06 | 4 | 4.91 | 4.61 | 4.66 | 4.65 | 4.66 | 4.68 | 4.65 | 4.68 |
| TC1900231 | CCDC130          | 81576 coiled-coil domain containing 130 /// Coiled-coil              | 6.93E-11 | 4 | 5.33 | 4.92 | 4.88 | 4.83 | 4.89 | 4.92 | 4.93 | 4.90 |
| TC1201391 | CCDC131          | 196441 coiled-coil domain containing 131 /// Coiled-coil             | 3.18E-08 | 4 | 6.97 | 6.41 | 6.36 | 6.21 | 6.18 | 6.31 | 6.39 | 6.30 |
| TC1000565 | CCDC147 /// C147 | 159686 coiled-coil domain containing 147 /// Coiled-coil             | 1.13E-06 | 4 | 4.72 | 4.42 | 4.44 | 4.28 | 4.10 | 4.50 | 4.72 | 4.64 |
| TC1701281 | CCDC49           | 54883 coiled-coil domain containing 49                               | 2.48E-07 | 4 | 7.91 | 7.54 | 7.34 | 7.47 | 7.49 | 7.63 | 7.70 | 7.72 |
| TC0301457 | CCDC52           | 152185 coiled-coil domain containing 52                              | 2.72E-09 | 4 | 3.64 | 3.25 | 3.31 | 3.43 | 3.42 | 3.38 | 3.51 | 3.46 |
| TC1200297 | CCDC65           | 85478 coiled-coil domain containing 65 /// Coiled-coil               | 1.72E-09 | 4 | 3.58 | 3.22 | 3.12 | 3.16 | 3.12 | 3.10 | 3.19 | 3.15 |
| TC1100909 | CCDC84           | 338657 coiled-coil domain containing 84                              | 1.08E-16 | 4 | 5.60 | 4.69 | 4.66 | 4.70 | 4.69 | 4.77 | 4.93 | 4.88 |
| TC1400489 | CCNK             | 8812 cyclin K /// Cyclin-K. [Source:Uniprot/SwissProt]               | 1.25E-05 | 4 | 6.95 | 6.94 | 6.78 | 6.77 | 6.66 | 6.83 | 6.89 | 6.95 |
| TC0301695 | CCNL1            | 57018 cyclin L1 /// Cyclin-L1 (Cyclin-L). [Source:Uniprot/SwissProt] | 0.000559 | 4 | 8.11 | 7.65 | 7.37 | 7.28 | 7.33 | 7.50 | 7.39 | 7.38 |
| TC0101773 | CCNL2            | 81669 cyclin L2 /// Cyclin-L2 (Paneth cell-enhancer)                 | 7.58E-32 | 4 | 6.27 | 5.39 | 5.46 | 5.48 | 5.50 | 5.56 | 5.59 | 5.56 |
| TC0200735 | CCNT2            | 905 cyclin T2                                                        | 3.96E-07 | 4 | 6.63 | 6.03 | 6.08 | 6.04 | 5.94 | 6.12 | 6.22 | 6.23 |
| TC0400545 | CCRN4L           | 25819 CCR4 carbon catabolite repression 4-like                       | 3.69E-07 | 4 | 4.96 | 4.59 | 4.24 | 4.47 | 4.80 | 4.68 | 4.88 | 4.56 |
| TC1100580 | CCS              | 9973 copper chaperone for superoxide dismutase                       | 0.000434 | 4 | 5.03 | 4.78 | 4.82 | 4.82 | 4.81 | 4.85 | 4.88 | 4.84 |
| TC0100874 | CD2              | 914 CD2 molecule /// T-cell surface antigen                          | 7.04E-05 | 4 | 3.85 | 3.28 | 3.19 | 3.21 | 3.21 | 3.21 | 3.30 | 3.27 |
| TC1100889 | CD3G             | 917 CD3g molecule, gamma (CD3-TCR complex)                           | 0.000302 | 4 | 4.84 | 3.94 | 3.83 | 4.00 | 3.88 | 3.84 | 4.01 | 4.20 |
| TC1200061 | CD4              | 920 CD4 molecule                                                     | 0.000191 | 4 | 4.86 | 4.68 | 4.58 | 4.57 | 4.60 | 4.57 | 4.59 | 4.64 |
| TC1701611 | CD79B            | 974 CD79b molecule, immunoglobulin-associated                        | 9.61E-05 | 4 | 4.92 | 4.79 | 4.76 | 4.74 | 4.63 | 4.69 | 4.69 | 4.81 |
| TC0601525 | CDC2L6           | 23097 cell division cycle 2-like 6 (CDK8-like) //                    | 6.31E-10 | 4 | 8.51 | 7.64 | 7.57 | 7.73 | 7.67 | 7.88 | 7.91 | 8.04 |
| TC1800395 | CDH2             | 1000 cadherin 2, type 1, N-cadherin (neuron)                         | 3.13E-06 | 4 | 3.35 | 3.02 | 2.82 | 2.85 | 2.80 | 2.92 | 2.90 | 3.05 |
| TC1000323 | CDH23            | 64072 cadherin-like 23 /// Cadherin-23 precursor                     | 3.51E-12 | 4 | 4.60 | 4.22 | 4.22 | 4.26 | 4.27 | 4.28 | 4.24 | 4.30 |

|           |                    |        |                                            |          |   |      |      |      |      |      |      |      |      |
|-----------|--------------------|--------|--------------------------------------------|----------|---|------|------|------|------|------|------|------|------|
| TC1700559 | CDK5RAP3           | 80279  | CDK5 regulatory subunit associated pr      | 0        | 4 | 6.97 | 5.38 | 5.30 | 5.30 | 5.31 | 5.38 | 5.48 | 5.41 |
| TC1900613 | CEACAM19           | 56971  | carcinoembryonic antigen-related cell      | 0.000219 | 4 | 4.22 | 4.00 | 4.02 | 3.94 | 3.97 | 4.00 | 3.93 | 3.97 |
| TC1900560 | CEACAM3            | 1084   | carcinoembryonic antigen-related cell      | 9.37E-06 | 4 | 7.82 | 7.47 | 7.23 | 7.45 | 7.57 | 7.74 | 7.57 | 7.60 |
| TC1101643 | CENTD2 /// ST/     | 116985 | centaurin, delta 2 /// StAR-related lipid  | 4.78E-09 | 4 | 6.39 | 5.80 | 5.67 | 5.83 | 5.78 | 5.78 | 5.72 | 5.83 |
| TC0501363 | CENTD3             | 64411  | centaurin, delta 3                         | 1.14E-13 | 4 | 6.31 | 5.29 | 5.27 | 5.46 | 5.44 | 5.54 | 5.53 | 5.61 |
| TC1100882 | CEP164             | 22897  | centrosomal protein 164kDa /// centro      | 1.14E-10 | 4 | 4.90 | 4.63 | 4.66 | 4.61 | 4.59 | 4.61 | 4.68 | 4.70 |
| TC0200296 | CEP68              | 23177  | centrosomal protein 68kDa /// Centros      | 4.61E-08 | 4 | 6.01 | 5.83 | 5.58 | 5.68 | 5.61 | 5.62 | 5.62 | 5.64 |
| TC0600283 | CFB                | 629    | complement factor B                        | 1.36E-05 | 4 | 3.50 | 3.22 | 3.21 | 3.18 | 3.22 | 3.28 | 3.15 | 3.23 |
| TC1500645 | CHD2               | 1106   | chromodomain helicase DNA binding p        | 1.65E-11 | 4 | 8.39 | 7.82 | 7.53 | 7.63 | 7.64 | 7.84 | 7.97 | 7.93 |
| TC0103140 | CHI3L1             | 1116   | chitinase 3-like 1 (cartilage glycoprotein | 4.66E-18 | 4 | 7.76 | 5.76 | 4.89 | 5.34 | 5.98 | 6.47 | 6.24 | 6.34 |
| TC1200654 | CHST11             | 50515  | carbohydrate (chondroitin 4) sulfotran:    | 1.07E-16 | 4 | 8.06 | 7.08 | 6.65 | 7.26 | 7.12 | 7.45 | 7.52 | 7.69 |
| TC1901269 | CIB3               | 117286 | calcium and integrin binding family me     | 4.24E-12 | 4 | 5.18 | 4.53 | 4.52 | 4.51 | 4.48 | 4.61 | 4.77 | 4.83 |
| TC1900036 | CIRBP              | 1153   | cold inducible RNA binding protein         | 6.38E-11 | 4 | 7.57 | 6.92 | 6.68 | 6.50 | 6.58 | 6.69 | 6.81 | 6.84 |
| TC0X00034 | CLCN4              | 1183   | chloride channel 4 /// Chloride channe     | 4.24E-12 | 4 | 5.13 | 4.61 | 4.42 | 4.47 | 4.45 | 4.56 | 4.63 | 4.80 |
| TC1200962 | CLEC2A             | ---    | C-type lectin domain family 2 member       | 0.000801 | 4 | 2.68 | 2.29 | 2.39 | 2.31 | 2.39 | 2.28 | 2.35 | 2.45 |
| TC1200116 | CLEC2D /// Q5(     | 29121  | C-type lectin domain family 2, member      | 0.000299 | 4 | 5.45 | 5.08 | 5.05 | 4.84 | 4.91 | 4.94 | 5.10 | 5.01 |
| TC1200967 | CLEC7A             | 64581  | C-type lectin domain family 7, member      | 1.53E-15 | 4 | 9.51 | 8.06 | 7.92 | 8.06 | 8.10 | 8.55 | 8.58 | 8.75 |
| TC1200120 | CLEC9A             | 283420 | C-type lectin domain family 9, member      | 4.35E-13 | 4 | 4.84 | 3.75 | 3.63 | 3.70 | 3.75 | 3.99 | 4.02 | 4.27 |
| TC0202212 | CLK1               | 1195   | CDC-like kinase 1 /// Dual specificity pr  | 4.01E-09 | 4 | 8.65 | 7.77 | 7.65 | 7.53 | 7.57 | 7.84 | 7.85 | 7.90 |
| TC0102829 | CLK2               | 1196   | CDC-like kinase 2 /// Dual specificity pr  | 9.83E-07 | 4 | 5.90 | 5.33 | 5.31 | 5.38 | 5.40 | 5.41 | 5.50 | 5.39 |
| TC1500480 | CLK3 /// Q6ZV\     | 649407 | CDC-like kinase 3 /// CDNA FLJ42022 fis    | 5.34E-05 | 4 | 6.28 | 5.92 | 5.85 | 6.00 | 5.93 | 5.96 | 5.94 | 5.93 |
| TC1501065 | CLN6               | 54982  | ceroid-lipofuscinosis, neuronal 6, late in | 5.45E-05 | 4 | 4.39 | 4.10 | 4.06 | 4.16 | 4.18 | 4.27 | 4.19 | 4.27 |
| TC0101843 | CLSTN1             | 22883  | calsyntenin 1 /// Calsyntenin-1 precurs    | 9.89E-07 | 4 | 5.26 | 4.85 | 4.88 | 5.08 | 5.01 | 4.99 | 5.09 | 5.04 |
| TC1200079 | CLSTN3             | 9746   | calsyntenin 3 /// Calsyntenin-3 precurs    | 9.60E-07 | 4 | 4.86 | 4.53 | 4.53 | 4.47 | 4.50 | 4.50 | 4.51 | 4.48 |
| TC0200502 | CNNM3              | 26505  | cyclin M3 /// cyclin M3 isoform 2 [Sour    | 4.06E-09 | 4 | 4.71 | 4.32 | 4.26 | 4.34 | 4.31 | 4.39 | 4.38 | 4.51 |
| TC0200501 | CNNM4              | 26504  | cyclin M4                                  | 0.000863 | 4 | 4.32 | 4.04 | 4.00 | 4.10 | 4.00 | 4.08 | 4.12 | 4.20 |
| TC1900856 | CNOT3              | 4849   | CCR4-NOT transcription complex, subu       | 2.91E-07 | 4 | 6.62 | 6.16 | 6.06 | 6.24 | 6.26 | 6.23 | 6.24 | 6.32 |
| TC0600395 | CNPY3 /// TNRI     | 10695  | canopy 3 homolog (zebrafish) /// trinuc    | 5.27E-06 | 4 | 7.74 | 7.15 | 7.23 | 7.46 | 7.40 | 7.43 | 7.42 | 7.52 |
| TC0700535 | CNPY4              | 245812 | canopy 4 homolog (zebrafish)               | 0.000108 | 4 | 4.74 | 4.31 | 4.41 | 4.61 | 4.60 | 4.46 | 4.59 | 4.50 |
| TC1700473 | CNTD1              | 124817 | cyclin N-terminal domain containing 1      | 8.50E-10 | 4 | 4.62 | 3.92 | 3.82 | 3.90 | 3.83 | 3.93 | 4.09 | 4.08 |
| TC1700733 | COG1 /// SSTR:9382 | ///    | ε component of oligomeric golgi comple     | 5.93E-14 | 4 | 4.94 | 4.61 | 4.61 | 4.70 | 4.68 | 4.74 | 4.82 | 4.81 |
| TC1601222 | COG4               | 25839  | component of oligomeric golgi comple       | 1.24E-08 | 4 | 5.44 | 4.77 | 4.90 | 5.09 | 5.10 | 5.08 | 5.18 | 5.10 |
| TC0201047 | CREB1              | 1385   | cAMP responsive element binding prot       | 8.41E-11 | 4 | 8.95 | 8.14 | 8.21 | 8.44 | 8.24 | 8.48 | 8.49 | 8.62 |
| TC0900164 | CREB3              | 10488  | cAMP responsive element binding prot       | 3.31E-05 | 4 | 5.46 | 5.39 | 5.01 | 5.06 | 5.05 | 5.06 | 5.08 | 5.26 |

|           |                 |        |                                            |          |   |      |      |      |      |      |      |      |      |
|-----------|-----------------|--------|--------------------------------------------|----------|---|------|------|------|------|------|------|------|------|
| TC0101090 | CREB3L4         | 148327 | cAMP responsive element binding prot       | 0.00095  | 4 | 4.09 | 3.92 | 3.91 | 3.91 | 3.93 | 3.92 | 3.88 | 3.89 |
| TC1600808 | CREBBP          | 1387   | CREB binding protein (Rubinstein-Taybi     | 2.60E-05 | 4 | 9.08 | 8.55 | 8.19 | 8.41 | 8.34 | 8.46 | 8.55 | 8.64 |
| TC0400020 | CRIPAK          | 285464 | cysteine-rich PAK1 inhibitor /// cystein   | 4.33E-06 | 4 | 6.53 | 5.99 | 5.89 | 5.82 | 5.88 | 5.97 | 6.03 | 5.94 |
| TC1700414 | CRKRS           | 51755  | Cdc2-related kinase, arginine/serine-ric   | 4.19E-05 | 4 | 7.08 | 7.18 | 6.76 | 6.76 | 6.72 | 6.76 | 7.00 | 6.99 |
| TC1700597 | CROP /// CROP   | 51747  | cisplatin resistance-associated overexp    | 1.52E-07 | 4 | 7.27 | 6.26 | 6.43 | 6.47 | 6.52 | 6.52 | 6.80 | 6.60 |
| TC1100306 | CRY2            | 1408   | cryptochrome 2 (photolyase-like)           | 0.000189 | 4 | 4.69 | 4.51 | 4.50 | 4.51 | 4.50 | 4.59 | 4.53 | 4.60 |
| TC1201244 | CSAD            | 51380  | cysteine sulfinic acid decarboxylase ///   | 7.80E-40 | 4 | 6.74 | 5.40 | 5.45 | 5.38 | 5.43 | 5.38 | 5.36 | 5.43 |
| TC1200976 | CSDA            | 8531   | cold shock domain protein A /// DNA-b      | 0.000314 | 4 | 5.64 | 4.69 | 4.18 | 4.74 | 4.91 | 5.01 | 5.04 | 5.08 |
| TC0501404 | CSF1R           | 1436   | colony stimulating factor 1 receptor, fo   | 7.54E-22 | 4 | 5.81 | 4.70 | 4.42 | 4.52 | 4.41 | 4.63 | 4.82 | 5.09 |
| TC0102119 | CSF3R           | 1441   | colony stimulating factor 3 receptor (gr   | 5.99E-07 | 4 | 9.64 | 8.74 | 8.84 | 8.96 | 8.81 | 8.72 | 8.64 | 8.74 |
| TC1900050 | CSNK1G2         | 1455   | casein kinase 1, gamma 2 /// Casein kir    | 0.000502 | 4 | 6.05 | 5.72 | 5.64 | 5.76 | 5.68 | 5.75 | 5.73 | 5.80 |
| TC1001075 | CTGLF2          | 729092 | centaurin, gamma-like family, member       | 6.61E-11 | 4 | 6.08 | 5.20 | 5.26 | 5.25 | 5.28 | 5.38 | 5.62 | 5.58 |
| TC1000975 | CTGLF2 /// CTC  | 729092 | // centaurin, gamma-like family, member    | 9.34E-27 | 4 | 6.17 | 3.60 | 3.58 | 3.82 | 3.89 | 4.21 | 4.43 | 4.65 |
| TC1000244 | CTGLF3          | 414189 | centaurin, gamma-like family, member       | 5.64E-27 | 4 | 6.59 | 4.35 | 4.40 | 4.59 | 4.74 | 5.09 | 5.32 | 5.40 |
| TC1000222 | CTGLF9P         | 728005 | centaurin, gamma-like family, member       | 9.91E-15 | 4 | 5.99 | 5.28 | 5.25 | 5.46 | 5.48 | 5.63 | 5.60 | 5.62 |
| TC1000930 | CTGLF9P /// CT  | 728005 | // centaurin, gamma-like family, member    | 5.68E-17 | 4 | 5.79 | 4.90 | 4.89 | 4.94 | 4.97 | 5.07 | 5.13 | 5.24 |
| TC1000954 | CTGLF9P /// Q   | 728005 | centaurin, gamma-like family, member       | 1.15E-10 | 4 | 4.11 | 3.70 | 3.69 | 3.71 | 3.78 | 3.87 | 3.86 | 3.89 |
| TC1000796 | CUBN            | 8029   | cubilin (intrinsic factor-cobalamin rece   | 0.000932 | 4 | 2.94 | 2.83 | 2.86 | 2.94 | 2.91 | 2.82 | 2.84 | 2.83 |
| TC1701544 | CUEDC1          | 731636 | // CUE domain containing 1                 | 6.10E-07 | 4 | 4.98 | 4.64 | 4.60 | 4.51 | 4.52 | 4.61 | 4.60 | 4.64 |
| TC1101354 | CUGBP1          | 10658  | CUG triplet repeat, RNA binding protei     | 6.09E-10 | 4 | 6.14 | 5.52 | 5.54 | 5.69 | 5.62 | 5.63 | 5.66 | 5.66 |
| TC1000052 | CUGBP2          | 10659  | CUG triplet repeat, RNA binding protei     | 1.56E-13 | 4 | 8.63 | 7.82 | 7.73 | 7.83 | 7.75 | 7.91 | 7.93 | 8.02 |
| TC0601277 | CUL7            | 9820   | cullin 7                                   | 0.000178 | 4 | 4.90 | 4.69 | 4.69 | 4.73 | 4.75 | 4.76 | 4.73 | 4.71 |
| TC0X00620 | CXorf18         | ---    | CDNA FLJ36186 fis, clone TESTI202701       | 0.000394 | 4 | 3.80 | 3.51 | 3.43 | 3.39 | 3.47 | 3.45 | 3.42 | 3.43 |
| TC0X01089 | CXorf34         | 79979  | chromosome X open reading frame 34         | 1.91E-05 | 4 | 4.52 | 4.26 | 4.24 | 4.25 | 4.30 | 4.29 | 4.40 | 4.37 |
| TC0X00855 | CXorf38         | 159013 | chromosome X open reading frame 38         | 7.22E-05 | 4 | 5.99 | 5.69 | 5.67 | 5.74 | 5.63 | 5.80 | 5.89 | 5.88 |
| TC0X00707 | CXorf52         | ---    | Uncharacterized protein CXorf52 (SPCX      | 0.000123 | 4 | 6.22 | 5.15 | 5.07 | 5.46 | 5.48 | 5.58 | 5.82 | 5.70 |
| TC1700657 | CXorf6 /// BCA: | 54828  | breast carcinoma amplified sequence 3      | 7.95E-09 | 4 | 6.19 | 5.67 | 5.67 | 5.73 | 5.65 | 5.69 | 5.69 | 5.70 |
| TC1800475 | CXXC1           | 30827  | CXXC finger 1 (PHD domain)                 | 7.01E-06 | 4 | 5.00 | 4.68 | 4.73 | 4.89 | 4.87 | 4.82 | 4.88 | 4.82 |
| TC0900738 | CXYorf1         | ---    | FAM39B protein (Fragment). [Source:U       | 3.14E-09 | 4 | 6.10 | 5.70 | 5.77 | 5.72 | 5.77 | 5.74 | 5.74 | 5.70 |
| TC1700111 | CYB5D1          | 124637 | cytochrome b5 domain containing 1 ///      | 1.42E-08 | 4 | 5.02 | 4.51 | 4.51 | 4.41 | 4.56 | 4.45 | 4.37 | 4.44 |
| TC1101222 | CYP2R1          | 120227 | cytochrome P450, family 2, subfamily F     | 1.52E-05 | 4 | 4.35 | 4.14 | 3.94 | 3.98 | 3.99 | 4.03 | 4.08 | 4.10 |
| TC1900272 | CYP4F12 /// CY  | 66002  | /// cytochrome P450, family 4, subfamily F | 1.27E-16 | 4 | 4.76 | 3.69 | 3.61 | 3.78 | 3.80 | 3.95 | 4.03 | 4.08 |
| TC1901267 | CYP4F2          | 8529   | cytochrome P450, family 4, subfamily F     | 0.000202 | 4 | 5.81 | 5.68 | 5.50 | 5.50 | 5.69 | 5.73 | 5.60 | 5.62 |
| TC1900271 | CYP4F3          | 4051   | cytochrome P450, family 4, subfamily F     | 7.57E-07 | 4 | 9.10 | 8.71 | 7.94 | 8.35 | 8.82 | 8.84 | 8.47 | 8.60 |

|           |                |           |                                          |          |   |       |      |      |      |      |      |      |      |
|-----------|----------------|-----------|------------------------------------------|----------|---|-------|------|------|------|------|------|------|------|
| TC0900350 | DAPK1          | 1612      | death-associated protein kinase 1 /// D  | 3.61E-14 | 4 | 6.41  | 4.98 | 4.81 | 5.24 | 5.19 | 5.39 | 5.35 | 5.52 |
| TC1501024 | DAPK2          | 23604     | death-associated protein kinase 2        | 0.000117 | 4 | 7.75  | 6.84 | 6.62 | 6.94 | 6.91 | 7.01 | 7.04 | 7.05 |
| TC0501530 | DBN1           | 1627      | drebrin 1                                | 2.25E-05 | 4 | 5.18  | 4.84 | 4.76 | 4.86 | 4.93 | 4.92 | 4.88 | 4.89 |
| TC0301396 | DCBLD2 /// Q9  | 131566    | discoidin, CUB and LCCL domain contai    | 1.22E-05 | 4 | 3.11  | 2.85 | 2.91 | 2.87 | 2.88 | 2.88 | 2.84 | 2.89 |
| TC2200664 | DDX17          | 10521     | DEAD (Asp-Glu-Ala-Asp) box polypeptic    | 2.87E-19 | 4 | 10.48 | 9.46 | 9.44 | 9.48 | 9.47 | 9.53 | 9.55 | 9.47 |
| TC0X00585 | DDX26B         | 203522    | DEAD/H (Asp-Glu-Ala-Asp/His) box poly    | 6.21E-05 | 4 | 4.48  | 4.04 | 4.17 | 4.22 | 4.31 | 4.22 | 4.30 | 4.19 |
| TC0X00159 | DDX3X          | 1654      | DEAD (Asp-Glu-Ala-Asp) box polypeptic    | 6.95E-10 | 4 | 9.58  | 9.09 | 8.70 | 8.88 | 8.89 | 9.03 | 8.98 | 9.05 |
| TC1701620 | DDX5           | 1655      | DEAD (Asp-Glu-Ala-Asp) box polypeptic    | 1.05E-13 | 4 | 8.08  | 7.59 | 7.23 | 7.01 | 7.09 | 7.21 | 7.26 | 7.24 |
| TC0701176 | DDX56          | 54606     | DEAD (Asp-Glu-Ala-Asp) box polypeptic    | 6.87E-07 | 4 | 4.68  | 4.44 | 4.41 | 4.40 | 4.55 | 4.55 | 4.51 | 4.49 |
| TC1101883 | DDX6           | 1656      | DEAD (Asp-Glu-Ala-Asp) box polypeptic    | 2.67E-08 | 4 | 8.59  | 8.53 | 8.17 | 8.16 | 8.00 | 8.18 | 8.24 | 8.33 |
| TC0800581 | DENND3         | 22898     | DENN/MADD domain containing 3            | 1.19E-22 | 4 | 8.18  | 6.98 | 6.79 | 6.73 | 6.67 | 6.82 | 6.80 | 6.88 |
| TC1100311 | DGKZ           | 8525      | diacylglycerol kinase, zeta 104kDa /// C | 0.000169 | 4 | 5.38  | 5.11 | 5.04 | 5.18 | 5.26 | 5.23 | 5.19 | 5.20 |
| TC0100292 | DHDDS          | 79947     | dehydrodolichyl diphosphate synthase     | 0.000145 | 4 | 4.59  | 4.30 | 4.37 | 4.45 | 4.46 | 4.47 | 4.46 | 4.37 |
| TC1900670 | DHX34          | 9704      | DEAH (Asp-Glu-Ala-His) box polypeptid    | 1.26E-06 | 4 | 5.44  | 5.09 | 5.07 | 5.06 | 5.10 | 5.11 | 5.09 | 5.12 |
| TC1700495 | DHX8           | 1659      | DEAH (Asp-Glu-Ala-His) box polypeptid    | 0.000153 | 4 | 6.56  | 6.37 | 6.17 | 6.25 | 6.17 | 6.32 | 6.47 | 6.47 |
| TC1401100 | DICER1         | 647691 // | dicer 1, ribonuclease type III           | 1.53E-13 | 4 | 8.87  | 7.94 | 8.34 | 8.18 | 7.98 | 8.05 | 8.09 | 8.12 |
| TC2000893 | DIDO1          | 11083     | death inducer-obliterator 1 /// Death-i  | 5.28E-08 | 4 | 5.71  | 5.38 | 5.30 | 5.46 | 5.43 | 5.46 | 5.54 | 5.54 |
| TC2100201 | DIP2A          | 23181     | DIP2 disco-interacting protein 2 homolo  | 4.30E-08 | 4 | 5.27  | 4.90 | 4.83 | 4.86 | 4.98 | 4.95 | 4.93 | 4.88 |
| TC1300151 | DLEU1          | ---       | Leukemia-associated protein 1 (Delete    | 0.000375 | 4 | 3.05  | 2.87 | 2.87 | 2.78 | 2.82 | 2.82 | 2.80 | 2.85 |
| TC1400373 | DLST /// DLSTP | 1743      | dihydrolipoamide S-succinyltransferase   | 9.47E-07 | 4 | 5.77  | 5.11 | 4.99 | 5.15 | 5.17 | 5.13 | 5.21 | 5.27 |
| TC0700451 | DMTF1          | 9988      | cyclin D binding myb-like transcription  | 6.63E-06 | 4 | 6.30  | 5.76 | 5.79 | 5.70 | 5.66 | 5.75 | 5.90 | 5.78 |
| TC1500958 | DMXL2          | 23312     | Dmx-like 2                               | 6.16E-10 | 4 | 7.39  | 5.96 | 5.97 | 6.42 | 6.26 | 6.43 | 6.65 | 6.54 |
| TC0300307 | DNAH1          | 25981     | dynein, axonemal, heavy chain 1          | 6.82E-31 | 4 | 5.00  | 4.44 | 4.33 | 4.32 | 4.39 | 4.40 | 4.35 | 4.39 |
| TC1001056 | DNAJB12        | 54788     | Dnaj (Hsp40) homolog, subfamily B, me    | 1.38E-05 | 4 | 6.28  | 5.93 | 5.79 | 5.96 | 5.90 | 6.02 | 6.09 | 6.17 |
| TC0900153 | DNAJB5         | 25822     | Dnaj (Hsp40) homolog, subfamily B, me    | 8.95E-05 | 4 | 4.69  | 4.55 | 4.38 | 4.28 | 4.35 | 4.53 | 4.49 | 4.63 |
| TC1100131 | DNHD1L /// C1  | 387750 // | dynein heavy chain domain 1-like /// cl  | 2.32E-08 | 4 | 3.77  | 3.52 | 3.52 | 3.48 | 3.49 | 3.50 | 3.53 | 3.54 |
| TC0500691 | DOCK2          | 1794      | dedicator of cytokinesis 2 /// Dedicator | 0.000129 | 4 | 8.67  | 8.21 | 8.12 | 8.15 | 8.06 | 8.11 | 8.14 | 8.13 |
| TC0800159 | DOCK5 /// PPP  | 80005 /// | dedicator of cytokinesis 5 /// protein p | 2.57E-20 | 4 | 9.01  | 7.68 | 7.47 | 7.52 | 7.51 | 7.78 | 7.81 | 7.92 |
| TC0900004 | DOCK8          | 81704     | dedicator of cytokinesis 8 /// Dedicator | 1.98E-11 | 4 | 9.04  | 8.08 | 8.03 | 8.11 | 7.98 | 8.13 | 8.24 | 8.32 |
| TC0601143 | DOM3Z          | 1797      | dom-3 homolog Z (C. elegans)             | 2.81E-10 | 4 | 5.24  | 4.84 | 4.86 | 4.79 | 4.87 | 4.90 | 4.82 | 4.95 |
| TC1601189 | DPEP2          | 64174     | dipeptidase 2 /// Dipeptidase 2 precurs  | 9.39E-24 | 4 | 8.34  | 6.17 | 6.19 | 6.72 | 6.69 | 7.06 | 7.12 | 7.24 |
| TC1601188 | DPEP3          | 64180     | dipeptidase 3                            | 6.93E-33 | 4 | 6.36  | 4.65 | 4.61 | 4.77 | 4.72 | 4.96 | 4.94 | 5.11 |
| TC1100539 | DPF2           | 5977      | D4, zinc and double PHD fingers family   | 3.80E-05 | 4 | 7.36  | 6.69 | 6.64 | 6.81 | 6.72 | 6.95 | 6.91 | 7.15 |
| TC0201641 | DQX1           | 165545    | DEAQ box polypeptide 1 (RNA-depende      | 0.00042  | 4 | 4.01  | 3.84 | 3.80 | 3.74 | 3.81 | 3.80 | 3.77 | 3.79 |



|           |                 |                                                                                |          |   |      |      |      |      |      |      |      |      |
|-----------|-----------------|--------------------------------------------------------------------------------|----------|---|------|------|------|------|------|------|------|------|
| TC1100417 | DTX4            | 23220 deltex 4 homolog (Drosophila)                                            | 5.45E-21 | 4 | 5.33 | 4.34 | 3.99 | 4.12 | 4.13 | 4.19 | 4.24 | 4.61 |
| TC0700184 | EEPD1           | 80820 endonuclease/exonuclease/phosphatase                                     | 1.18E-15 | 4 | 6.41 | 5.21 | 5.15 | 5.55 | 5.44 | 5.78 | 5.76 | 5.86 |
| TC1101554 | EFEMP2          | 30008 EGF-containing fibulin-like extracellular matrix protein 2               | 1.32E-05 | 4 | 4.77 | 4.56 | 4.59 | 4.63 | 4.64 | 4.54 | 4.51 | 4.55 |
| TC0600457 | EFHC1           | 114327 EF-hand domain (C-terminal) containing protein                          | 7.72E-27 | 4 | 3.13 | 2.49 | 2.46 | 2.44 | 2.45 | 2.51 | 2.52 | 2.59 |
| TC0100391 | EIF2C1          | 26523 eukaryotic translation initiation factor 2C1                             | 4.88E-06 | 4 | 5.89 | 5.37 | 5.35 | 5.63 | 5.56 | 5.47 | 5.56 | 5.49 |
| TC0801282 | EIF2C2          | 27161 eukaryotic translation initiation factor 2C2                             | 0.000222 | 4 | 6.58 | 6.43 | 6.07 | 6.47 | 6.40 | 6.40 | 6.21 | 6.27 |
| TC0100392 | EIF2C3          | 192669 eukaryotic translation initiation factor 2C3                            | 2.03E-12 | 4 | 5.89 | 5.11 | 5.09 | 5.25 | 5.21 | 5.30 | 5.39 | 5.40 |
| TC0701135 | ELMO1           | 9844 engulfment and cell motility 1                                            | 1.35E-05 | 4 | 6.95 | 6.49 | 6.22 | 6.43 | 6.40 | 6.59 | 6.58 | 6.63 |
| TC0601341 | ELOVL5          | 60481 ELOVL family member 5, elongation of very long chain fatty acid synthase | 5.53E-05 | 4 | 7.74 | 7.33 | 7.29 | 7.29 | 7.32 | 7.53 | 7.51 | 7.60 |
| TC1101477 | EML3            | 256364 echinoderm microtubule associated protein 3                             | 2.24E-07 | 4 | 5.51 | 5.20 | 5.27 | 5.23 | 5.18 | 5.18 | 5.23 | 5.10 |
| TC1901245 | EMR3            | 84658 egf-like module containing, mucin-like, type III                         | 1.72E-07 | 4 | 9.19 | 8.13 | 7.63 | 7.86 | 7.90 | 8.49 | 8.39 | 8.72 |
| TC1901099 | EMR4P           | 326342 egf-like module containing, mucin-like, type III                        | 4.67E-16 | 4 | 5.37 | 3.62 | 3.67 | 4.15 | 3.92 | 4.18 | 4.44 | 4.47 |
| TC0800803 | ENTPD4          | 9583 ectonucleoside triphosphate diphosphatase 4                               | 2.53E-06 | 4 | 6.90 | 6.80 | 6.52 | 6.59 | 6.49 | 6.56 | 6.67 | 6.66 |
| TC1200838 | EP400           | 57634 E1A binding protein p400 /// E1A-binding protein 4                       | 8.77E-07 | 4 | 5.00 | 4.68 | 4.59 | 4.70 | 4.80 | 4.79 | 4.88 | 4.78 |
| TC0100335 | EPB41           | 2035 erythrocyte membrane protein band 4.1                                     | 1.48E-19 | 4 | 8.21 | 6.84 | 6.55 | 7.09 | 7.09 | 7.40 | 7.56 | 7.65 |
| TC0400318 | EPGN            | 255324 epithelial mitogen homolog (mouse)                                      | 5.17E-05 | 4 | 2.88 | 2.53 | 2.66 | 2.51 | 2.56 | 2.53 | 2.53 | 2.57 |
| TC1700206 | EPN2            | 22905 epsin 2                                                                  | 4.07E-06 | 4 | 5.52 | 5.21 | 5.10 | 5.11 | 5.07 | 5.16 | 5.18 | 5.23 |
| TC1901271 | EPS15L1         | 58513 epidermal growth factor receptor pathway substrate 15L1                  | 5.03E-17 | 4 | 7.58 | 6.30 | 6.27 | 6.60 | 6.53 | 6.69 | 6.74 | 6.86 |
| TC0202023 | ERMN            | 57471 ermin, ERM-like protein                                                  | 6.89E-07 | 4 | 3.31 | 3.03 | 2.93 | 2.85 | 2.83 | 2.84 | 2.88 | 2.93 |
| TC1701614 | ERN1 /// Q96D   | 2081 endoplasmic reticulum to nucleus signaling 1                              | 6.90E-08 | 4 | 6.96 | 6.41 | 5.88 | 6.09 | 6.10 | 6.13 | 6.13 | 6.24 |
| TC0103379 | ERO1LB          | 56605 ERO1-like beta (S. cerevisiae) /// ERO1-like protein beta                | 3.95E-07 | 4 | 4.94 | 4.54 | 4.31 | 4.49 | 4.33 | 4.55 | 4.70 | 4.69 |
| TC1201019 | ERP27           | 121506 endoplasmic reticulum protein 27 kDa                                    | 4.42E-08 | 4 | 6.08 | 5.32 | 5.74 | 5.88 | 5.83 | 5.64 | 5.66 | 5.52 |
| TC1400496 | EVL             | 51466 Enah/Vasp-like                                                           | 1.35E-06 | 4 | 5.58 | 5.18 | 5.11 | 5.25 | 5.18 | 5.27 | 5.44 | 5.41 |
| TC2200176 | EWSR1           | 2130 Ewing sarcoma breakpoint region 1 /// Ewing sarcoma fusion protein        | 0.000418 | 4 | 7.08 | 6.88 | 6.91 | 6.78 | 6.74 | 6.79 | 6.91 | 6.82 |
| TC0400241 | EXOC1           | 55763 exocyst complex component 1                                              | 0.000246 | 4 | 6.01 | 5.83 | 5.86 | 5.85 | 5.63 | 5.83 | 5.92 | 5.98 |
| TC0500006 | EXOC3           | 11336 exocyst complex component 3 /// Exocyst complex component 3              | 1.44E-06 | 4 | 6.08 | 5.69 | 5.65 | 5.71 | 5.64 | 5.73 | 5.72 | 5.73 |
| TC1701387 | EZH1            | 2145 enhancer of zeste homolog 1 (Drosophila)                                  | 7.35E-16 | 4 | 7.50 | 6.42 | 6.29 | 6.39 | 6.37 | 6.47 | 6.46 | 6.59 |
| TC0501080 | F2RL2           | 2151 coagulation factor II (thrombin) receptor 2-like 2                        | 7.10E-05 | 4 | 5.70 | 4.85 | 5.02 | 5.15 | 5.09 | 5.14 | 5.01 | 5.19 |
| TC0100016 | FA87B_HUMAN --- | Protein FAM87B. [Source:Uniprot/SWISS-Prot]                                    | 0.000112 | 4 | 3.92 | 3.59 | 3.39 | 3.36 | 3.40 | 3.44 | 3.33 | 3.49 |
| TC0103183 | FAIM3           | 9214 Fas apoptotic inhibitory molecule 3                                       | 1.07E-15 | 4 | 6.56 | 4.99 | 4.87 | 4.99 | 4.87 | 5.00 | 5.23 | 5.67 |
| TC1100416 | FAM111A         | 63901 family with sequence similarity 111, member 1                            | 1.98E-23 | 4 | 5.39 | 3.97 | 3.79 | 4.16 | 4.27 | 4.54 | 4.67 | 4.70 |
| TC0400165 | FAM114A1        | 92689 family with sequence similarity 114, member 1                            | 4.99E-06 | 4 | 3.73 | 3.52 | 3.65 | 3.83 | 3.67 | 3.58 | 3.59 | 3.68 |
| TC0900391 | FAM120A         | 23196 family with sequence similarity 120A, member 1                           | 0.000205 | 4 | 7.09 | 6.64 | 6.64 | 6.83 | 6.77 | 6.78 | 6.78 | 6.85 |
| TC0600889 | FAM120B         | 84498 family with sequence similarity 120B, member 1                           | 7.24E-06 | 4 | 6.37 | 6.00 | 5.98 | 6.11 | 6.00 | 6.09 | 6.18 | 6.19 |

|           |                 |           |                                            |          |   |      |      |      |      |      |      |      |      |
|-----------|-----------------|-----------|--------------------------------------------|----------|---|------|------|------|------|------|------|------|------|
| TC0X00577 | FAM122C         | 159091    | family with sequence similarity 122C //    | 7.11E-08 | 4 | 3.57 | 3.40 | 3.32 | 3.28 | 3.28 | 3.37 | 3.45 | 3.44 |
| TC1101646 | FAM168A /// K   | 23201     | family with sequence similarity 168, me    | 1.66E-17 | 4 | 6.57 | 5.64 | 5.67 | 5.88 | 5.80 | 5.86 | 5.85 | 5.78 |
| TC0200604 | FAM39B          | ---       | Protein FAM39B (CXYorf1-like protein c     | 1.04E-06 | 4 | 5.72 | 5.40 | 5.34 | 5.37 | 5.40 | 5.39 | 5.37 | 5.41 |
| TC0100815 | FAM40A          | 85369     | family with sequence similarity 40, mer    | 7.05E-13 | 4 | 5.54 | 4.97 | 4.89 | 5.01 | 4.97 | 5.08 | 5.14 | 5.16 |
| TC0400826 | FAM44A          | 259282    | family with sequence similarity 44, mer    | 3.96E-06 | 4 | 9.90 | 9.06 | 8.78 | 8.90 | 8.85 | 9.03 | 9.31 | 9.28 |
| TC0100881 | FAM46C          | 54855     | family with sequence similarity 46, mer    | 1.27E-07 | 4 | 7.19 | 6.18 | 6.02 | 6.52 | 6.55 | 6.59 | 6.76 | 6.75 |
| TC0201328 | FAM49A          | 81553     | family with sequence similarity 49, mer    | 3.28E-08 | 4 | 8.68 | 7.64 | 7.63 | 8.03 | 7.73 | 7.95 | 7.90 | 8.20 |
| TC1600523 | FAM65A          | 79567     | family with sequence similarity 65, mer    | 6.79E-15 | 4 | 5.81 | 5.26 | 5.19 | 5.32 | 5.30 | 5.37 | 5.42 | 5.48 |
| TC0700678 | FAM71F2         | 346653    | family with sequence similarity 71, mer    | 1.23E-14 | 4 | 4.79 | 4.11 | 4.09 | 4.13 | 4.12 | 4.14 | 4.15 | 4.14 |
| TC1101755 | FAM76B          | 143684    | family with sequence similarity 76, mer    | 8.73E-06 | 4 | 5.25 | 4.92 | 4.86 | 4.87 | 4.85 | 4.99 | 5.13 | 5.12 |
| TC0800540 | FAM91A1         | 157769    | family with sequence similarity 91, mer    | 2.30E-10 | 4 | 7.09 | 6.44 | 6.43 | 6.47 | 6.31 | 6.58 | 6.55 | 6.68 |
| TC0300039 | FANCD2          | 2177      | Fanconi anemia, complementation gro        | 2.15E-05 | 4 | 4.24 | 4.07 | 3.67 | 3.64 | 3.95 | 3.99 | 4.04 | 3.89 |
| TC1701292 | FBXL20          | 84961     | F-box and leucine-rich repeat protein 2    | 2.45E-08 | 4 | 8.28 | 7.20 | 7.25 | 7.52 | 7.41 | 7.51 | 7.48 | 7.55 |
| TC1000034 | FBXO18          | 84893     | F-box protein, helicase, 18 /// F-box on   | 0.000364 | 4 | 5.71 | 5.40 | 5.51 | 5.59 | 5.44 | 5.49 | 5.59 | 5.52 |
| TC0300544 | FBXO40          | 51725     | F-box protein 40                           | 6.75E-06 | 4 | 3.87 | 3.45 | 3.42 | 3.43 | 3.30 | 3.45 | 3.44 | 3.51 |
| TC2200225 | FBXO7           | 25793     | F-box protein 7                            | 5.86E-09 | 4 | 7.01 | 5.70 | 5.72 | 5.78 | 5.78 | 5.62 | 5.66 | 5.65 |
| TC0401325 | FBXW7           | 55294     | F-box and WD repeat domain containir       | 3.83E-07 | 4 | 5.70 | 5.45 | 5.18 | 5.26 | 5.20 | 5.43 | 5.47 | 5.52 |
| TC0101218 | FCGR2C          | 9103      | Fc fragment of IgG, low affinity IIc, rece | 1.50E-06 | 4 | 7.48 | 7.02 | 7.08 | 7.24 | 7.08 | 7.33 | 7.25 | 7.31 |
| TC1900719 | FCGRT           | 2217      | Fc fragment of IgG, receptor, transport    | 9.91E-12 | 4 | 6.36 | 5.83 | 5.79 | 5.80 | 5.82 | 5.89 | 5.89 | 5.94 |
| TC1900307 | FCHO1           | 23149     | FCH domain only 1                          | 1.20E-10 | 4 | 5.78 | 5.25 | 5.21 | 5.33 | 5.31 | 5.37 | 5.33 | 5.40 |
| TC0500261 | FCHO2           | 115548    | FCH domain only 2 /// FCH domain onl       | 9.24E-09 | 4 | 7.17 | 6.16 | 6.12 | 6.04 | 5.88 | 6.35 | 6.39 | 6.56 |
| TC0501362 | FCHSD1          | 89848     | FCH and double SH3 domains 1               | 1.90E-21 | 4 | 5.81 | 5.08 | 5.04 | 5.11 | 5.08 | 5.18 | 5.15 | 5.17 |
| TC1101644 | FCHSD2          | 9873      | FCH and double SH3 domains 2               | 7.80E-08 | 4 | 7.80 | 7.19 | 7.26 | 7.45 | 7.21 | 7.34 | 7.44 | 7.40 |
| TC1800500 | FECH            | 2235      | ferrochelatase (protoporphyrin)            | 2.91E-06 | 4 | 5.25 | 4.06 | 4.03 | 4.32 | 4.38 | 4.38 | 4.47 | 4.45 |
| TC0900385 | FGD3            | 89846     | FYVE, RhoGEF and PH domain containir       | 2.75E-08 | 4 | 7.26 | 6.52 | 6.43 | 6.56 | 6.54 | 6.52 | 6.50 | 6.59 |
| TC0800886 | FGFR1           | 2260      | fibroblast growth factor receptor 1 (fm    | 4.97E-06 | 4 | 5.16 | 3.94 | 4.04 | 4.29 | 4.42 | 4.75 | 4.64 | 4.53 |
| TC0600878 | FGFR1OP /// C   | 11116 /// | FGFR1 oncogene partner /// chemokin        | 5.75E-16 | 4 | 4.71 | 3.97 | 4.20 | 4.37 | 4.26 | 4.37 | 4.45 | 4.43 |
| TC0400609 | FHDC1           | 85462     | FH2 domain containing 1                    | 3.37E-06 | 4 | 3.28 | 2.91 | 2.83 | 2.89 | 2.89 | 2.93 | 3.01 | 3.00 |
| TC1201157 | FKBP11          | 51303     | FK506 binding protein 11, 19 kDa           | 5.30E-15 | 4 | 5.80 | 5.19 | 5.03 | 4.96 | 5.02 | 5.09 | 5.17 | 5.01 |
| TC0501534 | FLJ10404        | 54540     | hypothetical protein FLJ10404              | 7.20E-21 | 4 | 5.62 | 5.06 | 4.98 | 5.06 | 5.07 | 5.05 | 5.05 | 5.04 |
| TC1600871 | FLJ11151        | 55313     | hypothetical protein FLJ11151              | 1.19E-07 | 4 | 8.42 | 7.13 | 7.30 | 7.64 | 7.42 | 7.63 | 7.55 | 7.86 |
| TC1200277 | FLJ20489        | 55652     | hypothetical protein FLJ20489              | 3.52E-07 | 4 | 4.75 | 4.34 | 4.42 | 4.48 | 4.50 | 4.56 | 4.56 | 4.61 |
| TC1701173 | FLJ25006 /// SC | 124923    | hypothetical protein FLJ25006 /// Unch     | 9.29E-19 | 4 | 4.69 | 3.94 | 3.93 | 3.92 | 3.94 | 3.97 | 4.05 | 3.99 |
| TC1600119 | FLJ39639        | 283876    | hypothetical protein FLJ39639              | 1.04E-05 | 4 | 7.46 | 6.62 | 6.74 | 6.86 | 6.82 | 6.94 | 7.17 | 7.08 |

|           |                                                                  |                                                  |          |      |      |      |      |      |      |      |      |      |
|-----------|------------------------------------------------------------------|--------------------------------------------------|----------|------|------|------|------|------|------|------|------|------|
| TC1200728 | FLJ42957                                                         | 400077 FLJ42957 protein                          | 2.28E-05 | 4    | 6.30 | 5.70 | 5.77 | 5.83 | 5.92 | 5.98 | 5.91 | 5.84 |
| TC1900251 | FLJ45910 /// N                                                   | 388512 FLJ45910 protein /// CDNA FLJ45910 fi     | 2.76E-20 | 4    | 6.09 | 4.91 | 4.78 | 4.92 | 5.05 | 5.19 | 5.22 | 5.25 |
| TC1700521 | FMNL1                                                            | 752 formin-like 1 /// Formin-like protein 1 (    | 0.000177 | 4    | 8.05 | 7.51 | 7.28 | 7.46 | 7.37 | 7.39 | 7.36 | 7.43 |
| TC0200787 | FMNL2                                                            | 114793 formin-like 2 /// Formin-like protein 2 ( | 0.000202 | 4    | 3.00 | 2.91 | 2.92 | 2.91 | 2.81 | 2.88 | 2.94 | 2.95 |
| TC0102652 | FMO5                                                             | 2330 flavin containing monooxygenase 5 ///       | 0.000851 | 4    | 3.34 | 3.08 | 3.03 | 3.14 | 3.18 | 3.19 | 3.14 | 3.28 |
| TC1401051 | FOXN3                                                            | 1112 forkhead box N3                             | 2.58E-11 | 4    | 7.09 | 6.26 | 6.18 | 6.59 | 6.52 | 6.60 | 6.69 | 6.78 |
| TC0101857 | FRAP1                                                            | 2475 FK506 binding protein 12-rapamycin as       | 6.95E-05 | 4    | 5.37 | 4.91 | 4.89 | 4.94 | 4.95 | 4.96 | 5.05 | 5.00 |
| TC1300073 | FRY                                                              | 10129 furry homolog (Drosophila) /// Protein     | 1.76E-20 | 4    | 7.56 | 5.84 | 5.50 | 5.91 | 5.82 | 6.18 | 6.41 | 6.53 |
| TC0400934 | FRYL                                                             | --- Protein furry homolog-like (ALL1-fused       | 1.50E-05 | 4    | 5.77 | 5.48 | 5.42 | 5.32 | 5.29 | 5.44 | 5.50 | 5.45 |
| TC0700663 | FSCN3                                                            | 29999 fascin homolog 3, actin-bundling prote     | 0.000184 | 4    | 3.56 | 3.38 | 3.36 | 3.36 | 3.36 | 3.39 | 3.22 | 3.44 |
| TC1600357 | FUS                                                              | 2521 fusion (involved in t(12;16) in malignan    | 7.16E-12 | 4    | 8.62 | 8.25 | 7.84 | 7.67 | 7.79 | 8.10 | 8.21 | 8.18 |
| TC0800861 | FUT10                                                            | 84750 fucosyltransferase 10 (alpha (1,3) fucos   | 4.95E-10 | 4    | 3.95 | 3.32 | 3.39 | 3.40 | 3.44 | 3.50 | 3.49 | 3.57 |
| TC1901696 | FUZ                                                              | 80199 fuzzy homolog (Drosophila) /// fuzzy hc    | 3.43E-13 | 4    | 5.46 | 5.03 | 4.96 | 4.98 | 4.99 | 5.04 | 4.99 | 5.09 |
| TC1700992 | FXR2                                                             | 9513 fragile X mental retardation, autosoma      | 2.40E-05 | 4    | 4.94 | 4.65 | 4.61 | 4.70 | 4.67 | 4.78 | 4.75 | 4.75 |
| TC1700480 | G6PC                                                             | 2538 glucose-6-phosphatase, catalytic subun      | 0.000459 | 4    | 2.90 | 2.69 | 2.65 | 2.53 | 2.67 | 2.67 | 2.56 | 2.63 |
| TC0400565 | GAB1                                                             | 2549 GRB2-associated binding protein 1           | 2.16E-16 | 4    | 7.52 | 6.41 | 6.30 | 6.48 | 6.17 | 6.60 | 6.61 | 6.93 |
| TC1101693 | GAB2                                                             | 9846 GRB2-associated binding protein 2           | 1.59E-06 | 4    | 8.90 | 8.78 | 8.29 | 8.37 | 8.34 | 8.70 | 8.61 | 8.75 |
| TC1200123 | GABARAPL1                                                        | 23710 GABA(A) receptor-associated protein lil    | 3.07E-13 | 4    | 6.68 | 5.95 | 5.61 | 5.64 | 5.78 | 5.86 | 5.81 | 5.98 |
| TC0601449 | GABRR2                                                           | 2570 gamma-aminobutyric acid (GABA) rece         | 0.000125 | 4    | 4.67 | 4.40 | 4.49 | 4.50 | 4.44 | 4.44 | 4.40 | 4.41 |
| TC0400753 | GAK                                                              | 2580 cyclin G associated kinase /// Cyclin G-α   | 5.46E-05 | 4    | 5.59 | 5.30 | 5.26 | 5.26 | 5.30 | 5.29 | 5.30 | 5.30 |
| TC0700900 | GALNT11                                                          | 63917 UDP-N-acetyl-alpha-D-galactosamine:p       | 1.47E-05 | 4    | 4.87 | 4.61 | 4.65 | 4.68 | 4.68 | 4.69 | 4.81 | 4.73 |
| TC1700027 | GARNL4                                                           | 23108 GTPase activating Rap/RanGAP domain        | 0.000285 | 4    | 6.22 | 5.70 | 5.73 | 5.87 | 5.79 | 5.81 | 5.78 | 5.76 |
| TC0900900 | GBA2                                                             | 57704 glucosidase, beta (bile acid) 2 /// Non-l  | 1.53E-13 | 4    | 5.81 | 5.17 | 5.07 | 5.09 | 5.08 | 5.15 | 5.12 | 5.16 |
| TC0200563 | GCC2                                                             | 9648 GRIP and coiled-coil domain containing      | 1.40E-05 | 4    | 6.50 | 6.27 | 5.82 | 5.85 | 5.80 | 5.94 | 6.37 | 6.33 |
| TC0601338 | GCM1                                                             | 8521 glial cells missing homolog 1 (Drosophil    | 1.05E-12 | 4    | 4.45 | 3.41 | 3.38 | 3.68 | 3.64 | 3.85 | 3.88 | 3.89 |
| TC2000850 | GCNT7                                                            | --- Uncharacterized protein C20orf105. [Sc       | 3.71E-05 | 4    | 6.36 | 6.03 | 5.68 | 5.69 | 5.69 | 6.05 | 6.04 | 5.91 |
| TC1600999 | GDPD3                                                            | 79153 glycerophosphodiester phosphodiester       | 1.85E-16 | 4    | 5.99 | 4.67 | 4.59 | 4.63 | 4.67 | 4.76 | 4.86 | 4.84 |
| TC1900628 | GEMIN7                                                           | 79760 gem (nuclear organelle) associated pro     | 2.38E-06 | 4    | 4.33 | 3.70 | 3.78 | 3.81 | 3.90 | 3.82 | 3.89 | 3.88 |
| TC1700935 | GGT6                                                             | 124975 gamma-glutamyltransferase 6 /// gamr      | 0.000845 | 4    | 5.55 | 5.38 | 5.36 | 5.30 | 5.31 | 5.36 | 5.30 | 5.35 |
| TC1101451 | GIF                                                              | 2694 gastric intrinsic factor (vitamin B synth   | 0.000195 | 4    | 3.52 | 3.02 | 3.08 | 3.18 | 3.15 | 3.18 | 3.15 | 3.08 |
| TC0701486 | GIGYF1                                                           | 64599 GRB10 interacting GYF protein 1            | 0.000907 | 4    | 4.95 | 4.83 | 4.78 | 4.76 | 4.81 | 4.78 | 4.77 | 4.79 |
| TC0700883 | GIMAP4                                                           | 55303 GTPase, IMAP family member 4               | 1.41E-10 | 4    | 7.76 | 7.00 | 6.71 | 6.75 | 6.28 | 6.94 | 7.15 | 7.59 |
| TC1201557 | GIT2                                                             | 9815 G protein-coupled receptor kinase inte      | 0.000456 | 4    | 9.10 | 8.62 | 8.80 | 8.91 | 8.81 | 8.84 | 8.84 | 8.86 |
| TC1600312 | GIYD1 /// SULT 548593 // GIY-YIG domain containing 1 /// sulfotr | 2.08E-06                                         | 4        | 6.28 | 6.02 | 5.94 | 5.97 | 6.03 | 6.03 | 6.02 | 6.01 |      |

|           |                                                                  |          |   |      |      |      |      |      |      |      |      |
|-----------|------------------------------------------------------------------|----------|---|------|------|------|------|------|------|------|------|
| TC1600332 | GIYD2 /// SULT 79008 /// GIY-YIG domain containing 2 /// sulfotr | 2.33E-05 | 4 | 6.59 | 6.43 | 6.33 | 6.40 | 6.40 | 6.43 | 6.40 | 6.36 |
| TC1200450 | GLI1 2735 glioma-associated oncogene homolog 1                   | 1.87E-12 | 4 | 5.73 | 5.13 | 5.12 | 5.24 | 5.31 | 5.34 | 5.22 | 5.27 |
| TC1200530 | GLIPR1 11010 GLI pathogenesis-related 1 (glioma)                 | 0.000108 | 4 | 9.57 | 8.65 | 8.77 | 8.89 | 8.57 | 8.92 | 8.94 | 9.15 |
| TC0103049 | GLUL 2752 glutamate-ammonia ligase (glutamine s                  | 6.12E-09 | 4 | 7.69 | 7.25 | 6.80 | 7.26 | 7.14 | 7.46 | 7.32 | 7.46 |
| TC1901323 | GMIP 51291 GEM interacting protein                               | 0.000409 | 4 | 6.96 | 6.53 | 6.45 | 6.56 | 6.50 | 6.41 | 6.37 | 6.45 |
| TC1800056 | GNAL 2774 guanine nucleotide binding protein (G                  | 0.000466 | 4 | 3.01 | 2.75 | 2.78 | 2.81 | 2.79 | 2.76 | 2.86 | 2.82 |
| TC0102523 | GNAT2 2780 guanine nucleotide binding protein (G                 | 9.55E-10 | 4 | 5.23 | 4.51 | 4.50 | 4.76 | 4.56 | 4.67 | 4.70 | 4.57 |
| TC0200416 | GNLY 10578 granulysin                                            | 0.000115 | 4 | 5.05 | 4.84 | 4.66 | 4.68 | 4.68 | 4.76 | 4.82 | 4.88 |
| TC0600396 | GNMT 27232 glycine N-methyltransferase                           | 8.36E-17 | 4 | 4.46 | 3.58 | 3.50 | 3.64 | 3.72 | 3.66 | 3.69 | 3.60 |
| TC0800815 | GNRH1 2796 gonadotropin-releasing hormone 1 (lut                 | 3.28E-06 | 4 | 5.05 | 4.00 | 4.09 | 4.21 | 4.32 | 4.39 | 4.43 | 4.47 |
| TC1201486 | GOLGA2L1 55592 golgi autoantigen, golgin subfamily a, 2          | 4.25E-07 | 4 | 4.05 | 3.82 | 3.80 | 3.75 | 3.80 | 3.76 | 3.77 | 3.83 |
| TC1500809 | GOLGA8B /// G 440270 // golgi autoantigen, golgin subfamily a, 8 | 9.84E-07 | 4 | 5.46 | 5.17 | 5.17 | 5.17 | 5.20 | 5.19 | 5.24 | 5.17 |
| TC0301490 | GOLGB1 2804 golgin B1, golgi integral membrane pro               | 5.39E-06 | 4 | 6.67 | 5.95 | 5.68 | 5.70 | 5.67 | 5.80 | 6.12 | 6.01 |
| TC0102838 | GON4L 54856 gon-4-like (C. elegans) /// GON-4-like p             | 6.58E-13 | 4 | 6.56 | 6.01 | 5.77 | 5.83 | 5.83 | 5.96 | 6.14 | 6.08 |
| TC0102961 | GPA33 10223 glycoprotein A33 (transmembrane)                     | 0.000412 | 4 | 4.11 | 3.73 | 3.82 | 3.78 | 3.78 | 3.76 | 3.65 | 3.80 |
| TC0300446 | GPR128 84873 G protein-coupled receptor 128                      | 6.46E-05 | 4 | 2.54 | 2.24 | 2.30 | 2.23 | 2.17 | 2.14 | 2.19 | 2.21 |
| TC0202111 | GPR155 151556 G protein-coupled receptor 155                     | 2.33E-08 | 4 | 6.40 | 6.21 | 5.71 | 5.60 | 5.40 | 5.91 | 5.95 | 5.98 |
| TC1200062 | GPR162 /// LEF 27239 /// G protein-coupled receptor 162 /// lep  | 0.000703 | 4 | 4.85 | 4.71 | 4.71 | 4.65 | 4.70 | 4.69 | 4.66 | 4.67 |
| TC1300612 | GPR18 2841 G protein-coupled receptor 18                         | 5.39E-06 | 4 | 4.79 | 4.08 | 4.01 | 4.11 | 4.05 | 4.31 | 4.34 | 4.37 |
| TC1200999 | GPR19 2842 G protein-coupled receptor 19                         | 5.01E-09 | 4 | 3.48 | 2.98 | 2.93 | 2.95 | 3.04 | 3.00 | 2.94 | 3.11 |
| TC0100803 | GPR61 83873 G protein-coupled receptor 61                        | 0.000243 | 4 | 3.64 | 3.38 | 3.38 | 3.31 | 3.38 | 3.41 | 3.33 | 3.43 |
| TC1401063 | GPR68 8111 G protein-coupled receptor 68                         | 2.55E-11 | 4 | 6.12 | 5.75 | 5.65 | 5.56 | 5.62 | 5.75 | 5.76 | 5.79 |
| TC1900669 | GPR77 27202 G protein-coupled receptor 77                        | 0.000142 | 4 | 4.95 | 4.31 | 4.33 | 4.39 | 4.32 | 4.41 | 4.26 | 4.40 |
| TC0300508 | GRAMD1C 54762 GRAM domain containing 1C                          | 2.05E-28 | 4 | 5.10 | 2.93 | 2.74 | 2.83 | 2.95 | 3.38 | 3.53 | 3.68 |
| TC0901202 | GRIN3A 116443 glutamate receptor, ionotropic, N-metl             | 2.36E-06 | 4 | 3.57 | 3.29 | 3.35 | 3.32 | 3.25 | 3.29 | 3.37 | 3.45 |
| TC1701300 | GSDML 55876 gasdermin-like /// gasdermin-like isof               | 8.60E-18 | 4 | 4.94 | 3.85 | 3.74 | 3.96 | 3.83 | 3.99 | 4.19 | 4.18 |
| TC0100807 | GSTM4 /// GST 642160 // glutathione S-transferase M4 /// glutat  | 9.87E-08 | 4 | 5.04 | 4.44 | 4.41 | 4.56 | 4.56 | 4.66 | 4.80 | 4.76 |
| TC0201388 | GTF3C2 2976 general transcription factor IIIC, polype            | 0.000302 | 4 | 4.95 | 4.63 | 4.67 | 4.67 | 4.72 | 4.76 | 4.82 | 4.80 |
| TC2000427 | GTPBP5 26164 GTP binding protein 5 (putative) /// GT             | 1.77E-05 | 4 | 5.12 | 5.14 | 4.83 | 4.84 | 4.89 | 4.96 | 4.90 | 5.00 |
| TC0601264 | GUCA1B 2979 guanylate cyclase activator 1B (retina),             | 2.33E-06 | 4 | 4.47 | 3.98 | 4.06 | 4.04 | 4.00 | 4.01 | 4.03 | 4.03 |
| TC1101163 | GVIN1 --- CDNA FLJ13373 fis, clone PLACE100074                   | 2.13E-08 | 4 | 6.48 | 5.37 | 5.17 | 5.11 | 4.69 | 5.26 | 6.11 | 6.14 |
| TC0401299 | GYPA 2993 glycoporin A (MNS blood group) /// G                   | 5.06E-05 | 4 | 4.70 | 3.24 | 3.17 | 3.49 | 3.46 | 3.48 | 3.44 | 3.49 |
| TC1201470 | HAL 3034 histidine ammonia-lyase                                 | 3.37E-09 | 4 | 7.87 | 6.48 | 6.04 | 6.50 | 6.46 | 6.64 | 6.72 | 6.88 |
| TC1100313 | HARBI1 /// KIA. 9776 harbinger transposase derived 1 /// Un      | 0.000136 | 4 | 6.45 | 6.23 | 6.08 | 6.15 | 6.09 | 6.21 | 6.21 | 6.26 |

|           |                |        |                                           |          |   |       |      |      |      |      |      |      |      |
|-----------|----------------|--------|-------------------------------------------|----------|---|-------|------|------|------|------|------|------|------|
| TC0501353 | HARS           | 3035   | histidyl-tRNA synthetase                  | 0.000895 | 4 | 4.96  | 4.59 | 4.65 | 4.77 | 4.70 | 4.75 | 4.85 | 4.79 |
| TC0500536 | HARS2          | 23438  | histidyl-tRNA synthetase 2, mitochondr    | 6.84E-06 | 4 | 5.85  | 5.21 | 5.28 | 5.31 | 5.24 | 5.36 | 5.40 | 5.32 |
| TC1600007 | HBA2 /// HBA1  | 3040   | hemoglobin, alpha 2 /// hemoglobin, a     | 3.22E-05 | 4 | 11.97 | 9.28 | 8.60 | 9.63 | 9.40 | 9.62 | 9.59 | 9.68 |
| TC1201140 | HDAC7          | 51564  | histone deacetylase 7                     | 2.20E-05 | 4 | 6.13  | 5.82 | 5.86 | 5.87 | 5.87 | 5.88 | 5.80 | 5.84 |
| TC0700091 | HDAC9          | 9734   | histone deacetylase 9 /// Histone deac    | 3.98E-08 | 4 | 4.00  | 3.76 | 3.74 | 3.73 | 3.69 | 3.71 | 3.70 | 3.81 |
| TC0901182 | HEMGN          | 55363  | hemogen                                   | 1.44E-13 | 4 | 5.43  | 3.50 | 3.26 | 3.48 | 3.50 | 3.59 | 3.51 | 3.65 |
| TC1501022 | HERC1          | 8925   | hect (homologous to the E6-AP (UBE3A      | 2.73E-05 | 4 | 6.58  | 6.05 | 5.95 | 6.06 | 5.95 | 5.98 | 6.13 | 6.05 |
| TC0400391 | HERC3          | 8916   | hect domain and RLD 3                     | 3.61E-12 | 4 | 8.61  | 7.75 | 7.75 | 7.62 | 7.54 | 7.73 | 7.71 | 7.72 |
| TC1600466 | HERPUD1        | 9709   | homocysteine-inducible, endoplasmic r     | 6.74E-10 | 4 | 7.01  | 6.30 | 6.35 | 6.38 | 6.35 | 6.47 | 6.50 | 6.69 |
| TC1700519 | HEXIM1         | 10614  | hexamethylene bis-acetamide inducibl      | 8.02E-10 | 4 | 7.49  | 6.62 | 6.60 | 7.07 | 6.94 | 6.93 | 6.99 | 6.95 |
| TC0801051 | HEY1           | 23462  | hairly/enhancer-of-split related with YR  | 0.000355 | 4 | 4.36  | 4.20 | 3.96 | 3.90 | 3.69 | 4.11 | 4.04 | 4.23 |
| TC1700843 | HGS            | 9146   | hepatocyte growth factor-regulated tyr    | 1.40E-05 | 4 | 5.50  | 5.14 | 5.08 | 5.17 | 5.13 | 5.15 | 5.11 | 5.15 |
| TC1201014 | HIST4H4 /// HI | 121504 | histone cluster 4, H4 /// histone cluster | 1.40E-07 | 4 | 4.48  | 3.97 | 3.83 | 3.77 | 3.74 | 4.05 | 3.82 | 4.13 |
| TC0601655 | HIVEP2         | 3097   | human immunodeficiency virus type I €     | 2.19E-09 | 4 | 6.99  | 7.20 | 6.52 | 6.50 | 6.21 | 6.81 | 7.00 | 7.03 |
| TC1900485 | HKR1           | 284459 | GLI-Kruppel family member HKR1 /// K      | 3.32E-06 | 4 | 4.65  | 4.41 | 4.41 | 4.34 | 4.35 | 4.34 | 4.38 | 4.39 |
| TC0601168 | HLA-DMA        | 3108   | major histocompatibility complex, class   | 7.83E-06 | 4 | 4.81  | 4.29 | 4.31 | 4.39 | 4.33 | 4.38 | 4.61 | 4.69 |
| TC0601162 | HLA-DOB        | 3112   | major histocompatibility complex, class   | 0.000961 | 4 | 3.87  | 3.50 | 3.47 | 3.39 | 3.39 | 3.50 | 3.48 | 3.60 |
| TC0600230 | HLA-F          | 3134   | major histocompatibility complex, class   | 1.03E-12 | 4 | 7.06  | 6.47 | 6.41 | 6.46 | 6.39 | 6.66 | 6.79 | 6.84 |
| TC2000164 | HM13           | 81502  | histocompatibility (minor) 13 /// Minor   | 0.000263 | 4 | 6.07  | 5.65 | 5.61 | 5.70 | 5.74 | 5.87 | 5.87 | 5.91 |
| TC1900031 | HMHA1          | 23526  | histocompatibility (minor) HA-1           | 0.000204 | 4 | 6.02  | 5.74 | 5.60 | 5.66 | 5.70 | 5.67 | 5.64 | 5.72 |
| TC0501551 | HNRNPH1 /// H  | 3187   | heterogeneous nuclear ribonucleoprot      | 4.59E-06 | 4 | 5.52  | 5.00 | 4.84 | 4.92 | 5.16 | 5.23 | 5.33 | 5.10 |
| TC1000289 | HNRNPH3        | 3189   | heterogeneous nuclear ribonucleoprot      | 4.22E-15 | 4 | 8.60  | 7.98 | 7.83 | 7.77 | 7.85 | 8.19 | 8.28 | 8.32 |
| TC0701082 | HOXA2          | 3199   | homeobox A2                               | 1.27E-06 | 4 | 5.98  | 4.82 | 4.63 | 4.79 | 4.74 | 4.91 | 4.86 | 5.00 |
| TC1101155 | HPX            | 3263   | hemopexin                                 | 0.000197 | 4 | 3.91  | 3.72 | 3.69 | 3.67 | 3.68 | 3.67 | 3.65 | 3.70 |
| TC0301253 | hsa-let-7g     | ---    | hsa-let-7g [Source:miRBase;Acc:MI0000     | 4.48E-13 | 4 | 7.63  | 5.51 | 5.40 | 5.57 | 5.36 | 5.94 | 6.13 | 6.31 |
| TC0102328 | hsa-mir-101-1  | ---    | hsa-mir-101-1 [Source:miRBase;Acc:MI      | 0.000224 | 4 | 4.06  | 3.39 | 3.35 | 3.28 | 3.13 | 3.51 | 3.76 | 3.64 |
| TC2000047 | hsa-mir-103-2  | ---    | hsa-mir-103-2 [Source:miRBase;Acc:MI      | 2.38E-21 | 4 | 9.76  | 8.11 | 7.85 | 7.98 | 7.92 | 8.33 | 8.45 | 8.79 |
| TC0100436 | hsa-mir-30e    | ---    | hsa-mir-30e [Source:miRBase;Acc:MI0C      | 0.000655 | 4 | 4.97  | 3.73 | 3.81 | 4.02 | 3.86 | 3.98 | 4.18 | 4.19 |
| TC1700977 | hsa-mir-324    | ---    | hsa-mir-324 [Source:miRBase;Acc:MI0C      | 0.00046  | 4 | 4.34  | 3.82 | 3.74 | 3.79 | 3.80 | 3.65 | 3.66 | 3.68 |
| TC0101233 | HSD17B7        | 730412 | hydroxysteroid (17-beta) dehydrogena      | 1.75E-11 | 4 | 4.56  | 4.06 | 4.11 | 4.13 | 4.13 | 4.29 | 4.41 | 4.35 |
| TC1000171 | HSD17B7P2      | ---    | hydroxysteroid (17-beta) dehydrogena      | 6.90E-11 | 4 | 4.72  | 4.30 | 4.34 | 4.32 | 4.27 | 4.41 | 4.56 | 4.46 |
| TC1200007 | HSN2           | 378465 | hereditary sensory neuropathy, type II    | 1.21E-13 | 4 | 7.40  | 6.30 | 6.09 | 6.08 | 6.09 | 6.31 | 6.29 | 6.19 |
| TC0301498 | HSPBAP1        | 79663  | HSPB (heat shock 27kDa) associated pr     | 6.45E-06 | 4 | 6.59  | 5.86 | 5.82 | 5.98 | 5.95 | 5.99 | 5.90 | 5.86 |
| TC0200361 | HTRA2          | 27429  | HtrA serine peptidase 2 /// Serine prot   | 3.59E-05 | 4 | 5.77  | 5.39 | 5.44 | 5.38 | 5.45 | 5.50 | 5.52 | 5.46 |

|           |                           |        |                                           |          |   |       |      |      |      |      |      |      |      |
|-----------|---------------------------|--------|-------------------------------------------|----------|---|-------|------|------|------|------|------|------|------|
| TC0X00949 | HUWE1                     | 10075  | HECT, UBA and WWE domain containir        | 0.000128 | 4 | 6.20  | 5.94 | 5.67 | 5.75 | 5.71 | 5.77 | 5.95 | 5.84 |
| TC1201565 | HVCN1                     | 84329  | hydrogen voltage-gated channel 1 /// f    | 1.18E-19 | 4 | 6.21  | 5.23 | 5.05 | 5.27 | 5.30 | 5.48 | 5.62 | 5.88 |
| TC1901160 | ICAM3                     | 3385   | intercellular adhesion molecule 3         | 3.04E-05 | 4 | 6.47  | 5.96 | 6.01 | 6.15 | 6.11 | 6.09 | 6.05 | 6.13 |
| TC1200904 | IFFO /// NP_54            | 25900  | intermediate filament family orphan //    | 1.36E-10 | 4 | 4.89  | 4.32 | 4.43 | 4.46 | 4.45 | 4.43 | 4.49 | 4.42 |
| TC1101030 | IFITM5                    | 387733 | interferon induced transmembrane prc      | 0.000759 | 4 | 5.56  | 5.06 | 5.15 | 5.03 | 5.12 | 5.10 | 5.02 | 5.12 |
| TC0900108 | IFNK                      | 56832  | interferon, kappa                         | 1.03E-07 | 4 | 4.49  | 3.53 | 3.53 | 3.99 | 3.47 | 3.82 | 3.56 | 3.55 |
| TC0201392 | IFT172                    | 26160  | intraflagellar transport 172 homolog (C   | 0.000506 | 4 | 3.45  | 3.32 | 3.36 | 3.31 | 3.30 | 3.28 | 3.30 | 3.31 |
| TC0600859 | IGF2R                     | 3482   | insulin-like growth factor 2 receptor     | 3.57E-07 | 4 | 10.09 | 9.42 | 8.99 | 9.12 | 9.14 | 9.33 | 9.22 | 9.36 |
| TC0301188 | IHPK2                     | 51447  | inositol hexaphosphate kinase 2           | 5.16E-06 | 4 | 5.35  | 5.12 | 5.06 | 5.10 | 5.04 | 5.15 | 5.18 | 5.21 |
| TC0800254 | IKBKB                     | 3551   | inhibitor of kappa light polypeptide ger  | 2.63E-12 | 4 | 6.11  | 5.40 | 5.33 | 5.39 | 5.42 | 5.37 | 5.49 | 5.41 |
| TC1001326 | IKZF5                     | 64376  | IKAROS family zinc finger 5 (Pegasus) //  | 0.000197 | 4 | 5.65  | 5.57 | 5.52 | 5.51 | 5.40 | 5.54 | 5.65 | 5.64 |
| TC0900149 | IL11RA /// GAL 3590 /// z | 3590   | interleukin 11 receptor, alpha /// galac  | 0.000496 | 4 | 4.40  | 4.22 | 4.26 | 4.24 | 4.24 | 4.25 | 4.28 | 4.25 |
| TC1901295 | IL12RB1                   | 3594   | interleukin 12 receptor, beta 1           | 1.46E-08 | 4 | 5.18  | 4.80 | 4.68 | 4.76 | 4.77 | 4.88 | 4.96 | 5.06 |
| TC1500548 | IL16                      | 3603   | interleukin 16 (lymphocyte chemoattra     | 2.00E-09 | 4 | 5.59  | 5.00 | 5.17 | 5.28 | 5.21 | 5.27 | 5.30 | 5.36 |
| TC1100641 | IL18BP                    | 10068  | interleukin 18 binding protein /// interl | 2.02E-08 | 4 | 4.58  | 4.22 | 4.19 | 4.20 | 4.18 | 4.26 | 4.26 | 4.33 |
| TC1200431 | IL23A                     | 51561  | interleukin 23, alpha subunit p19         | 1.21E-05 | 4 | 3.80  | 3.37 | 3.30 | 3.31 | 3.33 | 3.40 | 3.31 | 3.45 |
| TC0101468 | IL24                      | 11009  | interleukin 24                            | 3.04E-15 | 4 | 3.94  | 3.30 | 3.28 | 3.23 | 3.22 | 3.28 | 3.29 | 3.40 |
| TC1600110 | IL32                      | 9235   | interleukin 32                            | 1.38E-12 | 4 | 5.35  | 4.62 | 4.53 | 4.66 | 4.67 | 4.68 | 4.71 | 4.77 |
| TC0500120 | IL7R                      | 3575   | interleukin 7 receptor /// Interleukin-7  | 2.18E-05 | 4 | 4.85  | 3.73 | 3.60 | 3.82 | 3.66 | 3.70 | 3.90 | 3.91 |
| TC0400312 | IL8                       | 3576   | interleukin 8                             | 1.69E-15 | 4 | 9.55  | 8.59 | 7.07 | 6.91 | 7.43 | 8.36 | 8.06 | 9.12 |
| TC0Y00105 | IL9R                      | 3581   | interleukin 9 receptor                    | 5.58E-05 | 4 | 5.65  | 5.43 | 5.37 | 5.37 | 5.42 | 5.46 | 5.35 | 5.42 |
| TC0X00184 | INE1                      | ---    | Putative inactivation escape 1 protein.   | 5.98E-10 | 4 | 5.19  | 4.13 | 4.09 | 3.99 | 4.14 | 4.16 | 4.18 | 4.24 |
| TC1200910 | ING4                      | 51147  | inhibitor of growth family, member 4      | 1.85E-17 | 4 | 6.00  | 5.22 | 5.23 | 5.40 | 5.39 | 5.42 | 5.46 | 5.52 |
| TC0102134 | INPP5B                    | 3633   | inositol polyphosphate-5-phosphatase,     | 1.67E-09 | 4 | 5.12  | 4.33 | 4.41 | 4.56 | 4.48 | 4.58 | 4.82 | 4.76 |
| TC0201195 | INPP5D /// Q6f            | 3635   | inositol polyphosphate-5-phosphatase,     | 2.07E-07 | 4 | 8.09  | 7.40 | 7.35 | 7.51 | 7.46 | 7.44 | 7.53 | 7.60 |
| TC0101087 | INTS3                     | 65123  | integrator complex subunit 3 /// Integr   | 8.46E-05 | 4 | 6.55  | 6.07 | 6.04 | 5.97 | 5.94 | 6.00 | 6.01 | 5.99 |
| TC1101688 | INTS4                     | 92105  | integrator complex subunit 4              | 0.000245 | 4 | 5.46  | 5.12 | 5.03 | 5.20 | 5.17 | 5.20 | 5.28 | 5.25 |
| TC0700025 | IQCE                      | 23288  | IQ motif containing E /// IQ domain-coi   | 4.70E-07 | 4 | 5.49  | 5.12 | 5.21 | 5.18 | 5.02 | 5.18 | 5.33 | 5.32 |
| TC0300298 | IQCF2                     | 389123 | IQ motif containing F2                    | 9.41E-05 | 4 | 2.78  | 2.40 | 2.40 | 2.36 | 2.40 | 2.33 | 2.26 | 2.42 |
| TC1901693 | IRF3                      | 3661   | interferon regulatory factor 3 /// Interf | 1.46E-05 | 4 | 5.57  | 5.29 | 5.27 | 5.33 | 5.34 | 5.35 | 5.36 | 5.33 |
| TC1500509 | ISL2                      | 64843  | ISL LIM homeobox 2                        | 0.000961 | 4 | 4.58  | 4.51 | 4.40 | 4.36 | 4.40 | 4.39 | 4.35 | 4.55 |
| TC2200228 | ISX                       | 91464  | intestine-specific homeobox               | 0.000312 | 4 | 3.88  | 3.69 | 3.72 | 3.58 | 3.68 | 3.69 | 3.63 | 3.68 |
| TC1200019 | ITFG2                     | 55846  | integrin alpha FG-GAP repeat containin    | 7.03E-08 | 4 | 5.07  | 4.75 | 4.76 | 4.80 | 4.81 | 4.81 | 4.88 | 4.91 |
| TC1201266 | ITGA5                     | 3678   | integrin, alpha 5 (fibronectin receptor,  | 1.55E-11 | 4 | 7.15  | 6.19 | 6.09 | 6.33 | 6.34 | 6.58 | 6.47 | 6.67 |

|           |                |                                                   |          |   |      |      |      |      |      |      |      |      |
|-----------|----------------|---------------------------------------------------|----------|---|------|------|------|------|------|------|------|------|
| TC1600361 | ITGAD          | 3681 integrin, alpha D /// Integrin alpha-D pi    | 2.79E-05 | 4 | 4.51 | 4.31 | 4.32 | 4.28 | 4.28 | 4.27 | 4.24 | 4.26 |
| TC1600339 | ITGAL          | 3683 integrin, alpha L (antigen CD11A (p180)      | 1.39E-05 | 4 | 7.49 | 6.80 | 7.11 | 7.41 | 7.15 | 7.12 | 7.16 | 7.15 |
| TC1600360 | ITGAX          | 3687 integrin, alpha X (complement compon         | 3.98E-12 | 4 | 9.25 | 7.65 | 7.84 | 8.06 | 7.88 | 7.77 | 7.63 | 7.63 |
| TC1000043 | ITIH2          | 3698 inter-alpha (globulin) inhibitor H2 /// Ir   | 0.00031  | 4 | 2.87 | 2.68 | 2.70 | 2.63 | 2.66 | 2.66 | 2.69 | 2.69 |
| TC0300011 | ITPR1          | 3708 inositol 1,4,5-triphosphate receptor, ty     | 6.26E-08 | 4 | 5.03 | 4.59 | 4.44 | 4.65 | 4.48 | 4.54 | 4.76 | 4.81 |
| TC1201058 | ITPR2          | 3709 inositol 1,4,5-triphosphate receptor, ty     | 3.02E-06 | 4 | 6.58 | 5.90 | 6.17 | 6.29 | 6.08 | 6.17 | 6.35 | 6.24 |
| TC0201356 | ITSN2          | 50618 intersectin 2                               | 9.24E-08 | 4 | 7.44 | 7.13 | 7.07 | 6.97 | 6.93 | 6.97 | 7.04 | 6.97 |
| TC0102325 | JAK1           | 3716 Janus kinase 1 (a protein tyrosine kinas     | 2.07E-05 | 4 | 9.07 | 8.55 | 8.36 | 8.50 | 8.39 | 8.55 | 8.58 | 8.66 |
| TC1200861 | JARID1A        | 5927 jumonji, AT rich interactive domain 1A       | 4.26E-05 | 4 | 7.89 | 7.81 | 7.53 | 7.60 | 7.48 | 7.67 | 7.66 | 7.69 |
| TC0X00945 | JARID1C        | 8242 jumonji, AT rich interactive domain 1C,      | 0.00036  | 4 | 5.95 | 5.51 | 5.39 | 5.54 | 5.51 | 5.44 | 5.40 | 5.42 |
| TC0600093 | JARID2         | 3720 jumonji, AT rich interactive domain 2        | 1.36E-23 | 4 | 7.53 | 6.23 | 6.00 | 6.60 | 6.60 | 6.77 | 6.88 | 7.04 |
| TC0200421 | JMJD1A         | 55818 jumonji domain containing 1A /// JmjC       | 3.05E-13 | 4 | 7.51 | 6.71 | 6.63 | 6.94 | 6.85 | 7.07 | 7.13 | 7.19 |
| TC1001011 | JMJD1C         | 221037 jumonji domain containing 1C /// Probi     | 3.14E-11 | 4 | 8.98 | 8.15 | 8.00 | 8.04 | 7.89 | 8.30 | 8.36 | 8.48 |
| TC1101745 | JOSD3          | 79101 Josephin domain containing 3                | 7.27E-14 | 4 | 5.30 | 4.44 | 4.40 | 4.54 | 4.58 | 4.82 | 5.02 | 4.91 |
| TC1700998 | KCNAB3         | 9196 potassium voltage-gated channel, shak        | 1.51E-06 | 4 | 3.85 | 3.59 | 3.55 | 3.47 | 3.51 | 3.50 | 3.55 | 3.48 |
| TC0202400 | KCNJ13         | 3769 potassium inwardly-rectifying channel,       | 9.18E-05 | 4 | 4.98 | 4.50 | 4.36 | 4.41 | 4.30 | 4.36 | 4.38 | 4.33 |
| TC0101185 | KCNJ9          | 3765 potassium inwardly-rectifying channel,       | 0.000788 | 4 | 4.51 | 4.17 | 4.18 | 4.15 | 4.12 | 4.22 | 4.01 | 4.21 |
| TC1101546 | KCNK7          | 10089 potassium channel, subfamily K, memb        | 3.49E-07 | 4 | 5.51 | 5.35 | 5.25 | 5.17 | 5.21 | 5.26 | 5.30 | 5.27 |
| TC1300150 | KCNRG /// TRIM | 283518 // potassium channel regulator /// tripart | 1.10E-09 | 4 | 6.91 | 6.31 | 6.43 | 6.46 | 6.44 | 6.45 | 6.52 | 6.43 |
| TC1300447 | KCTD4          | 386618 potassium channel tetramerisation dor      | 0.000119 | 4 | 2.90 | 2.65 | 2.64 | 2.55 | 2.44 | 2.53 | 2.57 | 2.58 |
| TC2200274 | KDELR3         | 11015 KDEL (Lys-Asp-Glu-Leu) endoplasmic re       | 7.23E-05 | 4 | 4.43 | 4.10 | 4.16 | 4.10 | 4.12 | 4.18 | 4.10 | 4.22 |
| TC0500563 | KIAA0141       | 9812 KIAA0141                                     | 6.53E-09 | 4 | 4.91 | 4.72 | 4.54 | 4.60 | 4.71 | 4.76 | 4.78 | 4.71 |
| TC1600580 | KIAA0174       | 9798 KIAA0174 /// Uncharacterized protein I       | 0.000416 | 4 | 8.22 | 7.90 | 7.82 | 7.89 | 7.80 | 7.92 | 7.84 | 7.93 |
| TC0301912 | KIAA0226       | 9711 KIAA0226 /// Uncharacterized protein I       | 9.04E-05 | 4 | 5.63 | 5.32 | 5.23 | 5.37 | 5.22 | 5.29 | 5.40 | 5.53 |
| TC0601001 | KIAA0319       | 9856 KIAA0319                                     | 1.21E-10 | 4 | 4.32 | 3.65 | 3.59 | 3.83 | 3.86 | 4.02 | 4.08 | 3.96 |
| TC1900417 | KIAA0355       | 9710 KIAA0355                                     | 3.79E-12 | 4 | 5.40 | 5.01 | 4.77 | 4.77 | 4.71 | 4.96 | 5.05 | 5.17 |
| TC1600892 | KIAA0430       | 9665 KIAA0430 /// Limkain-b1. [Source:Unip        | 1.15E-10 | 4 | 8.57 | 7.59 | 7.50 | 7.74 | 7.60 | 7.72 | 7.77 | 7.83 |
| TC1600640 | KIAA0513       | 9764 KIAA0513                                     | 0.000124 | 4 | 7.05 | 6.63 | 6.41 | 6.61 | 6.54 | 6.60 | 6.54 | 6.69 |
| TC1600286 | KIAA0556       | 23247 KIAA0556 /// CDNA FLJ40166 fis, clone       | 1.03E-08 | 4 | 5.28 | 4.85 | 4.73 | 4.77 | 4.76 | 4.83 | 4.81 | 4.86 |
| TC1700962 | KIAA0753       | 9851 KIAA0753                                     | 1.03E-16 | 4 | 4.96 | 4.09 | 4.06 | 4.10 | 4.06 | 4.26 | 4.40 | 4.36 |
| TC0701131 | KIAA0895 /// N | 23366 KIAA0895 protein                            | 2.68E-05 | 4 | 3.29 | 2.96 | 2.99 | 3.03 | 3.06 | 3.00 | 2.94 | 2.99 |
| TC0102840 | KIAA0907       | 22889 KIAA0907 /// BLOM7 beta (Novel prote        | 1.46E-08 | 4 | 5.63 | 5.09 | 5.18 | 5.25 | 5.20 | 5.34 | 5.42 | 5.48 |
| TC1000346 | KIAA0913       | 23053 KIAA0913                                    | 1.34E-08 | 4 | 6.10 | 5.64 | 5.42 | 5.50 | 5.50 | 5.51 | 5.51 | 5.45 |
| TC1101860 | KIAA0999 /// C | 23387 KIAA0999 protein /// Serine/threonine       | 1.14E-10 | 4 | 7.38 | 6.88 | 6.50 | 6.75 | 6.64 | 6.75 | 6.83 | 6.93 |

|            |                         |        |                                            |          |   |      |      |      |      |      |      |      |      |
|------------|-------------------------|--------|--------------------------------------------|----------|---|------|------|------|------|------|------|------|------|
| TC0400509  | KIAA1109                | 84162  | KIAA1109 /// KIAA1109 (KIAA1109), mf       | 1.75E-05 | 4 | 7.23 | 6.92 | 6.61 | 6.48 | 6.45 | 6.60 | 6.72 | 6.67 |
| TC2000257  | KIAA1219                | 57148  | KIAA1219 /// K1219_HUMAN Isoform 4         | 0.000513 | 4 | 7.07 | 6.79 | 6.74 | 6.68 | 6.52 | 6.65 | 6.75 | 6.74 |
| TC0301545  | KIAA1257 /// C          | 57501  | KIAA1257 /// CDNA FLJ43738 fis, clone      | 5.63E-14 | 4 | 5.01 | 4.18 | 4.09 | 4.25 | 4.28 | 4.48 | 4.45 | 4.60 |
| TC1701453  | KIAA1267                | 284058 | KIAA1267                                   | 0.000379 | 4 | 6.79 | 6.20 | 6.17 | 6.33 | 6.25 | 6.32 | 6.31 | 6.38 |
| TC0400843  | KIAA1276                | 27146  | KIAA1276 protein                           | 8.26E-07 | 4 | 4.60 | 4.37 | 4.32 | 4.36 | 4.33 | 4.36 | 4.42 | 4.45 |
| TC0100797  | KIAA1324                | 57535  | KIAA1324 /// K1324_HUMAN Isoform 2         | 0.000831 | 4 | 7.32 | 6.07 | 5.58 | 6.37 | 6.38 | 6.80 | 6.52 | 6.77 |
| TC1500966  | KIAA1370                | 56204  | KIAA1370                                   | 7.89E-21 | 4 | 6.13 | 4.95 | 4.75 | 4.81 | 4.77 | 5.03 | 5.25 | 5.37 |
| TC1800228  | KIAA1468                | 57614  | KIAA1468                                   | 8.87E-11 | 4 | 6.29 | 5.56 | 5.55 | 5.51 | 5.41 | 5.63 | 5.73 | 5.65 |
| TC0400019  | KIAA1530 /// N          | 57654  | KIAA1530                                   | 5.39E-12 | 4 | 5.19 | 4.92 | 4.88 | 4.81 | 4.78 | 4.83 | 4.81 | 4.85 |
| TC1601303  | KIAA1609                | 57707  | KIAA1609                                   | 0.000734 | 4 | 4.65 | 4.54 | 4.50 | 4.46 | 4.46 | 4.45 | 4.49 | 4.51 |
| TC1901298  | KIAA1683                | 80726  | KIAA1683 /// Uncharacterized protein l     | 1.49E-13 | 4 | 5.22 | 4.55 | 4.49 | 4.66 | 4.52 | 4.66 | 4.73 | 4.83 |
| TC1400390  | KIAA1737                | 85457  | KIAA1737                                   | 0.000289 | 4 | 5.25 | 5.08 | 4.94 | 5.00 | 5.10 | 5.06 | 5.08 | 5.16 |
| TC1700986  | KIAA1787 /// G84461 /// |        | KIAA1787 protein /// G protein pathwa      | 2.12E-07 | 4 | 5.31 | 5.12 | 5.03 | 5.08 | 5.09 | 5.12 | 5.09 | 5.16 |
| TC1901056  | KIAA1881                | 729359 | KIAA1881                                   | 3.87E-05 | 4 | 4.57 | 4.36 | 4.33 | 4.26 | 4.27 | 4.25 | 4.31 | 4.24 |
| TC0901080  | KIF27 /// C1701         | 55582  | kinesin family member 27 /// Uncharac      | 7.70E-11 | 4 | 7.05 | 5.54 | 5.44 | 5.60 | 5.60 | 6.07 | 6.32 | 6.35 |
| TC0301164  | KIF9                    | 64147  | kinesin family member 9                    | 4.47E-06 | 4 | 3.62 | 3.47 | 3.48 | 3.54 | 3.62 | 3.51 | 3.49 | 3.54 |
| TC0600401  | KLC4                    | 89953  | kinesin light chain 4                      | 2.19E-10 | 4 | 5.07 | 4.80 | 4.75 | 4.76 | 4.75 | 4.77 | 4.75 | 4.85 |
| TC1400211  | KLHDC2                  | 23588  | kelch domain containing 2                  | 0.000179 | 4 | 5.70 | 5.25 | 5.33 | 5.35 | 5.24 | 5.33 | 5.51 | 5.54 |
| TC0101816  | KLHL21                  | 9903   | kelch-like 21 (Drosophila) /// Kelch-like  | 2.18E-05 | 4 | 5.52 | 4.97 | 5.06 | 5.17 | 5.15 | 5.19 | 5.18 | 5.30 |
| TC1200956  | KLRB1                   | 3820   | killer cell lectin-like receptor subfamily | 3.18E-05 | 4 | 3.88 | 3.20 | 3.03 | 3.06 | 3.06 | 3.03 | 3.21 | 3.45 |
| TC1200107  | KLRG1                   | 10219  | killer cell lectin-like receptor subfamily | 2.38E-05 | 4 | 3.52 | 2.96 | 3.02 | 2.96 | 2.96 | 2.93 | 3.09 | 3.00 |
| TC0101063  | KPRP                    | 448834 | keratinocyte proline-rich protein          | 0.000117 | 4 | 4.56 | 4.19 | 4.13 | 4.04 | 4.12 | 4.19 | 4.21 | 4.31 |
| TC1200359  | KRT18                   | 3875   | keratin 18                                 | 5.87E-05 | 4 | 4.96 | 4.75 | 4.71 | 4.70 | 4.71 | 4.81 | 4.77 | 4.77 |
| TC17r00013 | KRT40                   | 125115 | keratin 40                                 | 0.00017  | 4 | 3.56 | 3.35 | 3.37 | 3.30 | 3.37 | 3.34 | 3.27 | 3.36 |
| TC1201234  | KRT77                   | 374454 | keratin 77                                 | 0.000172 | 4 | 4.41 | 4.14 | 4.14 | 4.15 | 4.01 | 4.04 | 4.04 | 4.13 |
| TC2100289  | KRTAP21-1               | 337977 | keratin associated protein 21-1            | 0.000931 | 4 | 4.36 | 4.09 | 4.03 | 3.93 | 3.97 | 4.05 | 4.28 | 4.19 |
| TC0301587  | KY                      | 339855 | kyphoscoliosis peptidase /// Kyphoscol     | 1.16E-26 | 4 | 6.36 | 4.65 | 4.49 | 4.88 | 4.95 | 5.24 | 5.16 | 5.29 |
| TC1201189  | LASS5                   | 91012  | LAG1 homolog, ceramide synthase 5 //       | 7.16E-08 | 4 | 5.14 | 4.85 | 4.78 | 4.75 | 4.66 | 4.77 | 4.85 | 4.85 |
| TC0501484  | LCP2                    | 3937   | lymphocyte cytosolic protein 2 (SH2 do     | 1.02E-05 | 4 | 9.64 | 9.28 | 9.13 | 9.32 | 9.23 | 9.38 | 9.38 | 9.56 |
| TC1001241  | LDB1                    | 8861   | LIM domain binding 1                       | 4.25E-07 | 4 | 7.73 | 6.96 | 6.87 | 7.07 | 7.14 | 7.15 | 7.19 | 7.25 |
| TC0500474  | LEAP2                   | 116842 | liver expressed antimicrobial peptide 2    | 2.84E-05 | 4 | 4.43 | 3.99 | 3.85 | 3.91 | 3.86 | 3.94 | 3.93 | 3.89 |
| TC1900860  | LENG8                   | 114823 | leukocyte receptor cluster (LRC) memb      | 3.13E-16 | 4 | 6.31 | 5.64 | 5.53 | 5.63 | 5.66 | 5.62 | 5.63 | 5.60 |
| TC1200338  | LETMD1                  | 25875  | LETM1 domain containing 1 /// LETM1        | 5.65E-05 | 4 | 4.39 | 4.05 | 3.99 | 4.09 | 4.18 | 4.19 | 4.19 | 4.14 |
| TC1700275  | LGALS9 /// KSR 8844 /// |        | kinase suppressor of ras 1 /// lectin, ga  | 1.21E-09 | 4 | 6.16 | 5.51 | 5.63 | 5.75 | 5.53 | 5.70 | 5.84 | 5.89 |



|           |                |        |                                              |          |   |      |      |      |      |      |      |      |      |
|-----------|----------------|--------|----------------------------------------------|----------|---|------|------|------|------|------|------|------|------|
| TC1900864 | LILRA1         | 11024  | leukocyte immunoglobulin-like recepto        | 1.13E-08 | 4 | 8.05 | 6.97 | 7.06 | 7.27 | 7.17 | 7.43 | 7.47 | 7.62 |
| TC1201167 | LMBR1L         | 55716  | limb region 1 homolog (mouse)-like ///       | 2.36E-13 | 4 | 5.48 | 5.06 | 4.92 | 4.89 | 4.84 | 4.92 | 4.91 | 5.00 |
| TC1500261 | LOC100137047   | 8681   | hypothetical protein LOC8681 /// Cytos       | 7.45E-06 | 4 | 4.55 | 4.38 | 4.37 | 4.30 | 4.34 | 4.35 | 4.34 | 4.34 |
| TC0X01007 | LOC158830      | 158830 | similar to Ab2-183                           | 1.79E-15 | 4 | 6.77 | 5.27 | 4.92 | 5.51 | 5.46 | 5.67 | 5.68 | 5.56 |
| TC0301514 | LOC200810      | 200810 | similar to beta-1,4-mannosyltransferas       | 2.68E-06 | 4 | 5.56 | 5.31 | 5.29 | 5.26 | 5.24 | 5.32 | 5.24 | 5.27 |
| TC1600929 | LOC23117 /// N | 23117  | KIAA0220-like protein /// solute carrier     | 1.04E-14 | 4 | 6.92 | 5.93 | 5.79 | 5.72 | 5.83 | 5.81 | 5.97 | 5.87 |
| TC1600258 | LOC23117 /// C | 23117  | KIAA0220-like protein /// Uncharacteri       | 9.95E-14 | 4 | 7.04 | 6.14 | 5.99 | 5.92 | 6.03 | 6.03 | 6.20 | 6.04 |
| TC1101892 | LOC283152      | 283152 | hypothetical protein LOC283152               | 1.08E-05 | 4 | 4.70 | 4.38 | 4.35 | 4.33 | 4.34 | 4.39 | 4.48 | 4.47 |
| TC0200489 | LOC285033      | 285033 | hypothetical protein LOC285033               | 8.59E-10 | 4 | 4.44 | 3.92 | 3.91 | 4.08 | 4.17 | 4.11 | 4.12 | 4.11 |
| TC0701273 | LOC285908      | 285908 | hypothetical protein LOC285908               | 1.22E-07 | 4 | 4.52 | 4.18 | 4.14 | 4.10 | 4.12 | 4.17 | 4.12 | 4.14 |
| TC1600562 | LOC348174 ///  | 348174 | // secretory protein LOC348174 /// hypot     | 2.75E-06 | 4 | 5.50 | 5.27 | 5.24 | 5.25 | 5.27 | 5.29 | 5.25 | 5.26 |
| TC0500068 | LOC391767      | 391767 | similar to hCG1989915                        | 0.000311 | 4 | 3.84 | 3.30 | 3.37 | 3.23 | 3.12 | 3.12 | 3.11 | 3.35 |
| TC1400005 | LOC400879      | 400879 | hypothetical LOC400879                       | 0.000711 | 4 | 3.36 | 3.22 | 3.16 | 3.15 | 3.16 | 3.14 | 3.13 | 3.15 |
| TC0701480 | LOC402573      | 402573 | hypothetical LOC402573                       | 0.000258 | 4 | 4.51 | 3.87 | 3.83 | 4.05 | 4.03 | 4.16 | 4.13 | 3.97 |
| TC1600591 | LOC440348      | 440348 | similar to nuclear pore complex interac      | 6.31E-12 | 4 | 3.88 | 3.27 | 3.27 | 3.24 | 3.29 | 3.33 | 3.45 | 3.24 |
| TC1701624 | LOC440456      | 440456 | similar to pleckstrin homology domain        | 1.16E-10 | 4 | 6.47 | 5.75 | 5.53 | 5.63 | 5.69 | 5.61 | 5.62 | 5.62 |
| TC0700408 | LOC442590      | 442590 | similar to Williams Beuren syndrome ct       | 2.12E-10 | 4 | 6.07 | 5.20 | 5.06 | 5.23 | 5.31 | 5.35 | 5.53 | 5.48 |
| TC0501555 | LOC51149 /// N | 51149  | hypothetical LOC51149 /// Truncated c        | 0.000526 | 4 | 4.25 | 4.04 | 4.03 | 4.01 | 4.00 | 4.08 | 4.07 | 4.11 |
| TC0600393 | LOC642451 ///  | 642451 | // similar to ribosomal protein L7-like 1 // | 7.01E-06 | 4 | 4.82 | 4.50 | 4.48 | 4.55 | 4.63 | 4.60 | 4.73 | 4.59 |
| TC1701625 | LOC644397 ///  | 644397 | // similar to hCG2036502 /// leucine rich    | 0.000126 | 4 | 5.75 | 5.45 | 5.53 | 5.61 | 5.64 | 5.63 | 5.58 | 5.59 |
| TC0X00376 | LOC644732 ///  | 644732 | // similar to ATPase, Cu++ transporting, a   | 2.41E-08 | 4 | 6.34 | 5.79 | 6.03 | 5.84 | 5.60 | 5.95 | 6.06 | 6.09 |
| TC0701777 | LOC645159 ///  | 645159 | // similar to ALR-like protein /// myeloid/  | 1.33E-13 | 4 | 8.61 | 7.71 | 7.43 | 7.52 | 7.49 | 7.62 | 7.74 | 7.76 |
| TC1600563 | LOC650883 ///  | 650883 | // similar to pyruvate dehydrogenase pho     | 6.72E-09 | 4 | 5.42 | 4.81 | 4.81 | 4.94 | 4.87 | 4.92 | 5.03 | 5.06 |
| TC0100779 | LOC652899 ///  | 652899 | // similar to Salivary alpha-amylase precu   | 1.36E-06 | 4 | 3.92 | 3.64 | 3.72 | 3.62 | 3.61 | 3.59 | 3.63 | 3.60 |
| TC1200106 | LOC653441 ///  | 653441 | // similar to polyhomeotic 1-like /// polyh  | 6.33E-05 | 4 | 4.58 | 4.48 | 4.41 | 4.49 | 4.43 | 4.42 | 4.50 | 4.52 |
| TC0102673 | LOC653598      | 653598 | similar to cyclophilin-LC (COAS2)            | 0.000489 | 4 | 3.10 | 2.82 | 2.89 | 2.76 | 2.85 | 2.89 | 2.98 | 2.93 |
| TC0102622 | LOC653598 ///  | 653598 | // similar to cyclophilin-LC (COAS2) /// pe  | 0.000933 | 4 | 2.78 | 2.53 | 2.47 | 2.41 | 2.53 | 2.58 | 2.65 | 2.54 |
| TC0201251 | LOC727737 ///  | 727737 | // similar to APG4 autophagy 4 homolog f     | 1.13E-05 | 4 | 5.90 | 5.65 | 5.61 | 5.59 | 5.66 | 5.66 | 5.66 | 5.66 |
| TC0X01336 | LOC727913 ///  | 727913 | // similar to iduronate 2-sulfatase (Hunte   | 2.84E-05 | 4 | 6.35 | 5.80 | 5.83 | 5.92 | 5.84 | 5.94 | 5.90 | 6.03 |
| TC0601359 | LOC727945      | 727945 | similar to hCG1651100                        | 5.25E-06 | 4 | 6.09 | 4.93 | 5.24 | 5.19 | 5.28 | 5.27 | 5.33 | 5.28 |
| TC0201835 | LOC728601      | 728601 | similar to HDCMB45P                          | 8.85E-08 | 4 | 6.62 | 5.48 | 5.47 | 5.54 | 5.60 | 5.82 | 5.79 | 5.85 |
| TC0901011 | LOC728601      | 728601 | similar to HDCMB45P                          | 7.30E-05 | 4 | 3.79 | 2.75 | 2.81 | 2.93 | 2.90 | 2.94 | 2.91 | 2.99 |
| TC0900265 | LOC728601      | 728601 | similar to HDCMB45P                          | 0.000278 | 4 | 2.96 | 2.48 | 2.47 | 2.46 | 2.40 | 2.40 | 2.56 | 2.64 |
| TC1600964 | LOC728741      | 728741 | hypothetical LOC728741                       | 5.94E-05 | 4 | 5.76 | 5.10 | 5.15 | 5.07 | 5.12 | 5.16 | 5.27 | 5.17 |

|           |                                                                  |          |   |       |       |       |       |       |       |       |       |
|-----------|------------------------------------------------------------------|----------|---|-------|-------|-------|-------|-------|-------|-------|-------|
| TC1600963 | LOC728741 /// 728741 // hypothetical LOC728741 /// similar to r  | 6.58E-06 | 4 | 5.39  | 5.19  | 5.12  | 5.15  | 5.20  | 5.20  | 5.20  | 5.17  |
| TC1600295 | LOC728741 /// 728741 // hypothetical LOC728741 /// similar to r  | 7.24E-11 | 4 | 6.26  | 5.79  | 5.78  | 5.73  | 5.81  | 5.81  | 5.83  | 5.78  |
| TC0900274 | LOC728877 /// 728877 similar to COBW domain containing 3 /       | 1.12E-20 | 4 | 5.01  | 4.01  | 4.03  | 4.04  | 4.07  | 4.34  | 4.44  | 4.45  |
| TC0901005 | LOC728877 /// 728877 // similar to COBW domain containing 3 /    | 3.38E-18 | 4 | 5.14  | 4.24  | 4.29  | 4.29  | 4.28  | 4.57  | 4.68  | 4.63  |
| TC0700352 | LOC729597 729597 similar to Williams-Beuren syndrome ci          | 2.08E-07 | 4 | 5.58  | 5.07  | 5.04  | 5.12  | 5.11  | 5.12  | 5.10  | 5.17  |
| TC0700216 | LOC729597 /// 729597 // similar to Williams-Beuren syndrome ci   | 1.86E-10 | 4 | 4.68  | 4.09  | 3.93  | 4.07  | 4.07  | 4.15  | 4.26  | 4.25  |
| TC1800337 | LOC729602 729602 similar to nuclear pore complex interac         | 9.15E-13 | 4 | 5.82  | 5.02  | 4.72  | 4.80  | 4.83  | 4.83  | 4.96  | 4.86  |
| TC1600891 | LOC729978 729978 similar to LOC339047 protein                    | 8.20E-09 | 4 | 6.90  | 5.89  | 5.67  | 5.68  | 5.85  | 5.67  | 5.98  | 5.88  |
| TC0701340 | LOC730323 /// 730323 // similar to postmeiotic segregation incre | 1.17E-16 | 4 | 6.45  | 5.73  | 5.66  | 5.88  | 5.83  | 5.89  | 6.01  | 5.93  |
| TC0700373 | LOC730324 /// 730324 // similar to postmeiotic segregation incre | 4.13E-06 | 4 | 4.66  | 4.25  | 4.24  | 4.31  | 4.39  | 4.39  | 4.46  | 4.40  |
| TC0100778 | LOC730924 /// 730924 // similar to Pancreatic alpha-amylase pre  | 7.99E-25 | 4 | 4.71  | 3.71  | 3.79  | 3.73  | 3.68  | 3.76  | 3.86  | 3.82  |
| TC1601024 | LOC90835 90835 hypothetical protein LOC90835                     | 1.82E-26 | 4 | 5.21  | 4.47  | 4.45  | 4.47  | 4.51  | 4.56  | 4.55  | 4.66  |
| TC0201159 | LOC93349 /// C 93349 hypothetical protein BC004921 /// CDN       | 6.46E-06 | 4 | 6.10  | 5.92  | 5.69  | 5.65  | 5.54  | 5.82  | 6.08  | 6.01  |
| TC1901322 | LPAR2 9170 lysophosphatidic acid receptor 2                      | 4.27E-12 | 4 | 5.30  | 4.67  | 4.63  | 4.62  | 4.74  | 4.77  | 4.75  | 4.74  |
| TC1800301 | LPIN2 9663 lipin 2                                               | 1.30E-17 | 4 | 7.80  | 6.74  | 6.54  | 6.92  | 6.88  | 7.06  | 7.14  | 7.34  |
| TC0300889 | LPP 4026 LIM domain containing preferred trans                   | 4.58E-10 | 4 | 6.54  | 6.13  | 5.94  | 5.87  | 5.81  | 5.96  | 5.91  | 6.04  |
| TC1101432 | LPXN 9404 leupaxin                                               | 2.90E-07 | 4 | 4.65  | 4.08  | 4.24  | 4.32  | 4.10  | 4.17  | 4.32  | 4.25  |
| TC0701483 | LRCH4 /// Q8TI 4034 leucine-rich repeats and calponin homc       | 3.36E-10 | 4 | 5.84  | 5.48  | 5.45  | 5.47  | 5.48  | 5.49  | 5.47  | 5.48  |
| TC1700532 | LRRK2 9884 leucine rich repeat containing 37A /// l              | 0.000345 | 4 | 6.96  | 6.38  | 6.34  | 6.55  | 6.57  | 6.60  | 6.72  | 6.65  |
| TC1200250 | LRRK2 120892 leucine-rich repeat kinase 2 /// Leucine            | 3.84E-07 | 4 | 9.66  | 8.80  | 8.76  | 9.07  | 8.89  | 9.11  | 9.08  | 9.25  |
| TC0700576 | LRWD1 222229 leucine-rich repeats and WD repeat do               | 7.45E-13 | 4 | 5.65  | 5.26  | 5.20  | 5.23  | 5.28  | 5.28  | 5.27  | 5.24  |
| TC1600709 | LUC7L 55692 LUC7-like (S. cerevisiae)                            | 0.000151 | 4 | 5.12  | 4.76  | 4.57  | 4.56  | 4.59  | 4.64  | 4.75  | 4.56  |
| TC0600275 | LY6G5B /// CSN 58496 /// lymphocyte antigen 6 complex, locus G   | 1.61E-19 | 4 | 5.70  | 5.12  | 5.02  | 5.02  | 5.11  | 5.11  | 5.09  | 5.15  |
| TC1901540 | LYPD4 147719 LY6/PLAUR domain containing 4 /// Lyf               | 8.31E-06 | 4 | 4.14  | 3.78  | 3.88  | 3.84  | 3.80  | 3.80  | 3.77  | 3.78  |
| TC0103376 | LYST 1130 lysosomal trafficking regulator                        | 4.01E-16 | 4 | 9.29  | 8.20  | 8.15  | 8.17  | 8.11  | 8.42  | 8.46  | 8.54  |
| TC1101204 | LYVE1 10894 lymphatic vessel endothelial hyalurona               | 9.64E-10 | 4 | 5.04  | 4.14  | 4.07  | 4.02  | 4.01  | 4.32  | 4.26  | 4.24  |
| TC2200271 | MAFF 23764 v-maf musculoaponeurotic fibrosarcorr                 | 2.57E-06 | 4 | 4.98  | 4.84  | 4.43  | 4.36  | 4.53  | 4.79  | 4.79  | 4.99  |
| TC1101542 | MALAT_HUMA --- Metastasis-associated lung adenocarcin            | 2.81E-05 | 4 | 12.29 | 12.05 | 12.09 | 11.99 | 11.99 | 12.12 | 12.15 | 12.24 |
| TC2000242 | MANBAL 731453 // mannosidase, beta A, lysosomal-like             | 0.000115 | 4 | 4.94  | 4.64  | 4.70  | 4.76  | 4.72  | 4.79  | 4.77  | 4.81  |
| TC1201251 | MAP3K12 7786 mitogen-activated protein kinase kinas              | 3.64E-07 | 4 | 4.80  | 4.53  | 4.46  | 4.46  | 4.49  | 4.53  | 4.48  | 4.51  |
| TC1701442 | MAP3K14 9020 mitogen-activated protein kinase kinas              | 7.37E-15 | 4 | 4.93  | 4.45  | 4.40  | 4.43  | 4.44  | 4.49  | 4.46  | 4.55  |
| TC0X00803 | MAP3K15 389840 mitogen-activated protein kinase kinas            | 0.000379 | 4 | 3.25  | 3.09  | 3.11  | 3.06  | 3.20  | 3.16  | 3.16  | 3.14  |
| TC0600799 | MAP3K7IP2 23118 mitogen-activated protein kinase kinas           | 0.000351 | 4 | 8.83  | 8.55  | 8.49  | 8.61  | 8.52  | 8.69  | 8.67  | 8.76  |
| TC0X00835 | MAP3K7IP3 257397 mitogen-activated protein kinase kinas          | 0.000257 | 4 | 5.60  | 5.41  | 5.32  | 5.33  | 5.19  | 5.29  | 5.27  | 5.33  |

|           |                |           |                                         |          |   |      |      |      |      |      |      |      |      |
|-----------|----------------|-----------|-----------------------------------------|----------|---|------|------|------|------|------|------|------|------|
| TC1400962 | MAP3K9         | 4293      | mitogen-activated protein kinase kinas  | 0.000664 | 4 | 4.09 | 3.91 | 3.95 | 3.90 | 3.88 | 3.90 | 3.89 | 3.89 |
| TC1101521 | MAP4K2         | 5871      | mitogen-activated protein kinase kinas  | 0.000516 | 4 | 5.09 | 5.03 | 4.86 | 4.96 | 5.01 | 5.03 | 4.90 | 4.99 |
| TC0601630 | MAP7           | 9053      | microtubule-associated protein 7 /// Er | 6.52E-08 | 4 | 4.80 | 4.51 | 4.42 | 4.46 | 4.43 | 4.56 | 4.56 | 4.66 |
| TC0600340 | MAPK13         | 5603      | mitogen-activated protein kinase 13 //  | 6.99E-12 | 4 | 5.93 | 5.56 | 5.53 | 5.48 | 5.44 | 5.53 | 5.38 | 5.40 |
| TC1000228 | MAPK8          | 5599      | mitogen-activated protein kinase 8 ///  | 9.72E-10 | 4 | 4.49 | 4.08 | 3.91 | 3.97 | 3.95 | 4.03 | 4.18 | 4.22 |
| TC1600058 | MAPK8IP3       | 23162     | mitogen-activated protein kinase 8 inte | 2.71E-08 | 4 | 5.21 | 4.90 | 4.91 | 4.91 | 4.89 | 4.86 | 4.81 | 4.85 |
| TC1000927 | MAR8           | 220972    | membrane-associated ring finger (C3HC   | 9.82E-08 | 4 | 7.24 | 6.75 | 6.55 | 6.75 | 6.66 | 6.95 | 6.97 | 7.06 |
| TC1200451 | MARS           | 4141      | methionyl-tRNA synthetase /// Methio    | 6.28E-24 | 4 | 7.21 | 5.86 | 5.76 | 5.91 | 5.96 | 5.98 | 6.15 | 5.96 |
| TC0101854 | MASP2          | 10747     | mannan-binding lectin serine peptidase  | 3.66E-07 | 4 | 4.22 | 3.99 | 3.90 | 3.92 | 3.89 | 3.95 | 3.91 | 3.95 |
| TC1900314 | MAST3          | 23031     | microtubule associated serine/threonin  | 0.000831 | 4 | 7.55 | 7.13 | 6.80 | 6.90 | 6.90 | 6.92 | 6.87 | 7.06 |
| TC1800474 | MBD1           | 4152      | methyl-CpG binding domain protein 1 /   | 0.000199 | 4 | 5.99 | 5.79 | 5.74 | 5.79 | 5.77 | 5.79 | 5.88 | 5.89 |
| TC1200452 | MBD6           | 114785    | methyl-CpG binding domain protein 6 /   | 1.60E-14 | 4 | 7.24 | 6.48 | 6.30 | 6.33 | 6.36 | 6.39 | 6.33 | 6.36 |
| TC1400794 | MBIP           | 51562     | MAP3K12 binding inhibitory protein 1 /  | 0.000803 | 4 | 4.22 | 4.12 | 3.87 | 3.86 | 3.92 | 4.02 | 4.16 | 4.21 |
| TC0X01246 | MBNL3          | 55796     | muscleblind-like 3 (Drosophila) /// Mus | 4.93E-10 | 4 | 6.64 | 4.68 | 4.48 | 5.03 | 5.14 | 5.12 | 5.16 | 5.13 |
| TC2100198 | MC3AP_HUMA --- |           | Uncharacterized protein C21orf85 prec   | 0.000159 | 4 | 3.87 | 3.61 | 3.60 | 3.68 | 3.63 | 3.63 | 3.69 | 3.69 |
| TC1200503 | MDM2           | 4193      | Mdm2 p53 binding protein homolog (n     | 9.86E-10 | 4 | 7.94 | 7.03 | 7.09 | 7.33 | 7.22 | 7.33 | 7.51 | 7.69 |
| TC0101442 | MDM4           | 4194      | Mdm4 p53 binding protein homolog (n     | 8.47E-18 | 4 | 8.03 | 7.13 | 7.00 | 6.76 | 6.75 | 7.03 | 7.15 | 7.18 |
| TC1201601 | MED13L         | 23389     | mediator complex subunit 13-like        | 4.45E-11 | 4 | 8.95 | 8.31 | 8.08 | 8.18 | 8.09 | 8.30 | 8.39 | 8.44 |
| TC1900731 | MED25          | 81857     | mediator complex subunit 25 /// ARC/r   | 3.23E-21 | 4 | 6.73 | 5.86 | 5.73 | 5.84 | 5.88 | 5.97 | 5.95 | 6.11 |
| TC1901315 | MEF2B          | 731041 // | myocyte enhancer factor 2B              | 0.000443 | 4 | 5.32 | 5.14 | 5.22 | 5.28 | 5.29 | 5.21 | 5.17 | 5.19 |
| TC0501135 | MEF2C          | 4208      | myocyte enhancer factor 2C              | 8.09E-14 | 4 | 5.94 | 5.50 | 4.75 | 4.80 | 4.67 | 5.22 | 5.20 | 5.64 |
| TC1800134 | MEP1B          | 4225      | meprin A, beta                          | 0.000569 | 4 | 2.82 | 2.62 | 2.62 | 2.62 | 2.57 | 2.59 | 2.59 | 2.59 |
| TC0700542 | MEPCE          | 56257     | methylphosphate capping enzyme          | 5.80E-08 | 4 | 5.50 | 5.05 | 4.84 | 5.02 | 5.15 | 5.18 | 5.06 | 5.14 |
| TC1400691 | METTL3         | 56339     | methyltransferase like 3                | 4.30E-06 | 4 | 5.46 | 5.07 | 4.99 | 5.01 | 5.02 | 5.10 | 5.17 | 5.15 |
| TC0401246 | MFSD8          | 256471    | major facilitator superfamily domain cc | 3.34E-11 | 4 | 4.29 | 3.79 | 3.83 | 3.79 | 3.77 | 3.89 | 4.02 | 3.98 |
| TC0700578 | MGC119295      | 441273    | similar to Williams-Beuren syndrome ci  | 0.000329 | 4 | 5.05 | 4.24 | 4.44 | 4.38 | 4.39 | 4.40 | 4.37 | 4.31 |
| TC1001238 | MGEA5          | 10724     | meningioma expressed antigen 5 (hyali   | 8.32E-21 | 4 | 8.86 | 7.66 | 7.47 | 7.45 | 7.37 | 7.76 | 7.84 | 7.86 |
| TC1600140 | MGRN1          | 23295     | mahogunin, ring finger 1                | 0.000478 | 4 | 6.14 | 5.89 | 5.71 | 5.87 | 5.86 | 5.70 | 5.67 | 5.74 |
| TC1100181 | MICAL2         | 9645      | microtubule associated monooxygenase    | 8.79E-05 | 4 | 7.25 | 6.27 | 6.17 | 6.25 | 6.27 | 6.50 | 6.41 | 6.53 |
| TC1100182 | MICALCL        | 84953     | MICAL C-terminal like                   | 3.98E-06 | 4 | 5.72 | 4.55 | 4.76 | 4.87 | 4.78 | 5.07 | 5.08 | 5.05 |
| TC0700712 | MKLN1          | 4289      | muskelin 1, intracellular mediator cont | 2.77E-09 | 4 | 7.65 | 6.98 | 7.01 | 7.18 | 7.06 | 7.31 | 7.26 | 7.40 |
| TC0300064 | MKRN2          | 23609     | makorin, ring finger protein, 2         | 1.31E-06 | 4 | 5.71 | 5.19 | 5.37 | 5.48 | 5.36 | 5.47 | 5.48 | 5.48 |
| TC1201164 | MLL2           | 8085      | myeloid/lymphoid or mixed-lineage leu   | 2.10E-09 | 4 | 7.05 | 6.42 | 6.11 | 6.23 | 6.26 | 6.21 | 6.27 | 6.26 |
| TC0700597 | MLL5           | 55904     | myeloid/lymphoid or mixed-lineage leu   | 4.48E-11 | 4 | 9.13 | 8.78 | 8.59 | 8.60 | 8.51 | 8.69 | 8.79 | 8.85 |

|           |                 |        |                                          |          |   |      |      |      |      |      |      |      |      |
|-----------|-----------------|--------|------------------------------------------|----------|---|------|------|------|------|------|------|------|------|
| TC2000220 | MMP24           | 10893  | matrix metalloproteinase 24 (membran     | 4.93E-05 | 4 | 5.05 | 4.73 | 4.73 | 4.75 | 4.75 | 4.72 | 4.73 | 4.70 |
| TC1200470 | MON2            | 23041  | MON2 homolog (S. cerevisiae) /// MON     | 2.35E-08 | 4 | 5.79 | 5.42 | 5.29 | 5.18 | 5.08 | 5.14 | 5.26 | 5.19 |
| TC1201641 | MORN3           | 283385 | MORN repeat containing 3                 | 0.000383 | 4 | 4.87 | 4.54 | 4.52 | 4.52 | 4.53 | 4.51 | 4.55 | 4.61 |
| TC1300009 | MPHOSPH8        | 54737  | M-phase phosphoprotein 8 /// M-phas      | 4.01E-08 | 4 | 7.40 | 6.65 | 6.58 | 6.67 | 6.60 | 6.71 | 7.06 | 6.99 |
| TC1800338 | MPPE1           | 65258  | metallophosphoesterase 1 /// metallo     | 2.53E-17 | 4 | 7.13 | 5.61 | 5.87 | 6.18 | 6.07 | 6.22 | 6.34 | 6.35 |
| TC1700166 | MPRIIP /// MRIP | 23164  | myosin phosphatase Rho interacting pr    | 6.05E-09 | 4 | 4.82 | 4.50 | 4.40 | 4.49 | 4.50 | 4.45 | 4.56 | 4.56 |
| TC0101263 | MPZL1           | 9019   | myelin protein zero-like 1 /// Myelin pr | 7.88E-09 | 4 | 7.71 | 5.63 | 5.97 | 6.49 | 6.12 | 6.49 | 6.67 | 6.94 |
| TC1101750 | MRE11A          | 4361   | MRE11 meiotic recombination 11 hom       | 8.30E-09 | 4 | 4.44 | 3.79 | 3.76 | 3.95 | 3.96 | 4.03 | 4.22 | 4.10 |
| TC1101450 | MRPL16          | 54948  | mitochondrial ribosomal protein L16      | 1.96E-08 | 4 | 5.69 | 5.17 | 5.20 | 5.39 | 5.45 | 5.39 | 5.50 | 5.38 |
| TC1700428 | MSL-1           | 339287 | male-specific lethal-1 homolog           | 8.49E-05 | 4 | 9.96 | 9.48 | 9.49 | 9.58 | 9.57 | 9.65 | 9.59 | 9.60 |
| TC1600454 | MT1E /// MT1F   | 4493   | metallothionein 1E /// Metallothionein   | 7.78E-05 | 4 | 5.43 | 5.32 | 5.11 | 5.18 | 5.21 | 5.32 | 5.37 | 5.36 |
| TC1500774 | MTMR10          | 54893  | myotubularin related protein 10 /// M    | 5.40E-06 | 4 | 7.50 | 6.79 | 6.90 | 6.95 | 6.82 | 6.96 | 6.87 | 6.96 |
| TC1300430 | MTRF1           | 9617   | mitochondrial translational release fact | 2.86E-06 | 4 | 4.85 | 4.46 | 4.58 | 4.65 | 4.66 | 4.65 | 4.67 | 4.63 |
| TC2100141 | MX2 /// Q6ZTY   | 4600   | myxovirus (influenza virus) resistance 2 | 7.75E-09 | 4 | 8.32 | 7.41 | 7.32 | 7.44 | 7.31 | 7.70 | 7.80 | 7.90 |
| TC1000575 | MXI1            | 4601   | MAX interactor 1 /// MAX-interacting p   | 1.07E-08 | 4 | 5.97 | 5.20 | 5.26 | 5.53 | 5.57 | 5.56 | 5.69 | 5.64 |
| TC0103139 | MYBPH           | 4608   | myosin binding protein H                 | 2.94E-15 | 4 | 5.02 | 4.49 | 4.43 | 4.40 | 4.46 | 4.47 | 4.42 | 4.50 |
| TC1300557 | MYCBP2          | 23077  | MYC binding protein 2 /// Probable E3    | 3.25E-06 | 4 | 6.54 | 5.85 | 5.75 | 5.83 | 5.77 | 5.97 | 6.25 | 6.16 |
| TC1701015 | MYH10           | 4628   | myosin, heavy chain 10, non-muscle //,   | 2.30E-08 | 4 | 3.99 | 3.81 | 3.71 | 3.69 | 3.67 | 3.70 | 3.65 | 3.71 |
| TC1600893 | MYH11           | 4629   | myosin, heavy chain 11, smooth muscle    | 9.91E-20 | 4 | 5.34 | 4.67 | 4.60 | 4.76 | 4.77 | 4.81 | 4.76 | 4.85 |
| TC1701031 | MYH3            | 4621   | myosin, heavy chain 3, skeletal muscle,  | 1.28E-07 | 4 | 3.56 | 3.35 | 3.34 | 3.29 | 3.32 | 3.33 | 3.35 | 3.39 |
| TC1901129 | MYO1F           | 4542   | myosin IF /// Myosin-If (Myosin-Ie). [So | 1.49E-07 | 4 | 9.19 | 8.15 | 8.07 | 8.26 | 8.18 | 8.24 | 8.20 | 8.30 |
| TC1500963 | MYO5C           | 55930  | myosin VC                                | 0.000243 | 4 | 2.80 | 2.71 | 2.63 | 2.60 | 2.61 | 2.62 | 2.67 | 2.73 |
| TC1900291 | MYO9B           | 4650   | myosin IXB                               | 3.43E-09 | 4 | 7.61 | 6.82 | 6.54 | 6.68 | 6.66 | 6.74 | 6.88 | 6.94 |
| TC0102300 | MYSM1           | 114803 | myb-like, SWIRM and MPN domains 1        | 3.24E-05 | 4 | 6.62 | 6.08 | 5.97 | 6.05 | 5.92 | 6.09 | 6.14 | 6.06 |
| TC1600356 | MYST1           | 84148  | MYST histone acetyltransferase 1         | 0.0001   | 4 | 6.04 | 5.64 | 5.64 | 5.80 | 5.71 | 5.73 | 5.75 | 5.82 |
| TC1700579 | MYST2           | 11143  | MYST histone acetyltransferase 2         | 1.39E-07 | 4 | 5.80 | 5.43 | 5.25 | 5.37 | 5.29 | 5.50 | 5.58 | 5.66 |
| TC1300384 | N4BP2L1 /// NI  | 90634  | NEDD4 binding protein 2-like 1 /// Nov   | 3.72E-06 | 4 | 3.57 | 3.26 | 3.25 | 3.25 | 3.27 | 3.31 | 3.36 | 3.38 |
| TC1300386 | N4BP2L2 /// NI  | 10443  | NEDD4 binding protein 2-like 2 /// pho   | 1.59E-06 | 4 | 6.51 | 5.99 | 5.99 | 5.86 | 5.80 | 6.02 | 6.16 | 6.09 |
| TC0401052 | NAAA            | 27163  | N-acylethanolamine acid amidase          | 1.35E-05 | 4 | 6.03 | 4.82 | 4.84 | 5.26 | 4.94 | 5.00 | 5.06 | 5.18 |
| TC1200441 | NAB2            | 4665   | NGFI-A binding protein 2 (EGR1 binding   | 2.71E-12 | 4 | 4.87 | 4.29 | 4.17 | 4.22 | 4.38 | 4.37 | 4.27 | 4.33 |
| TC0101779 | NADK            | 65220  | NAD kinase /// NAD kinase (EC 2.7.1.23   | 8.22E-05 | 4 | 7.04 | 6.61 | 6.49 | 6.58 | 6.62 | 6.73 | 6.64 | 6.69 |
| TC1100629 | NADSYN1         | 55191  | NAD synthetase 1                         | 1.50E-13 | 4 | 6.12 | 5.64 | 5.45 | 5.40 | 5.51 | 5.43 | 5.41 | 5.38 |
| TC0401120 | NAP1L5          | 266812 | nucleosome assembly protein 1-like 5     | 8.79E-08 | 4 | 5.27 | 4.65 | 4.60 | 4.56 | 4.70 | 4.66 | 4.75 | 4.58 |
| TC1701677 | NAT9            | 26151  | N-acetyltransferase 9                    | 1.45E-18 | 4 | 5.09 | 4.37 | 4.35 | 4.42 | 4.39 | 4.45 | 4.41 | 4.44 |

|           |                 |           |                                            |          |   |      |      |      |      |      |      |      |      |
|-----------|-----------------|-----------|--------------------------------------------|----------|---|------|------|------|------|------|------|------|------|
| TC0101916 | NBPF10 /// Q8I  | 440673    | neuroblastoma breakpoint family, men       | 2.05E-06 | 4 | 6.55 | 5.83 | 5.83 | 6.02 | 6.03 | 6.07 | 6.32 | 6.09 |
| TC0100920 | NBPF20 /// Q5   | 400818    | neuroblastoma breakpoint family, men       | 5.93E-05 | 4 | 5.91 | 5.17 | 5.18 | 5.34 | 5.28 | 5.35 | 5.48 | 5.30 |
| TC0102676 | NBPF9 /// NBP   | 728980 // | neuroblastoma breakpoint family, men       | 9.76E-05 | 4 | 6.99 | 6.20 | 6.15 | 6.37 | 6.28 | 6.33 | 6.54 | 6.33 |
| TC0200097 | NCOA1           | 8648      | nuclear receptor coactivator 1             | 0.000508 | 4 | 8.98 | 8.47 | 8.48 | 8.59 | 8.36 | 8.54 | 8.62 | 8.69 |
| TC0801016 | NCOA2           | 10499     | nuclear receptor coactivator 2             | 7.36E-05 | 4 | 8.78 | 8.58 | 8.31 | 8.41 | 8.32 | 8.47 | 8.46 | 8.55 |
| TC1600209 | NDE1            | 54820     | nudE nuclear distribution gene E homo      | 7.17E-25 | 4 | 8.11 | 6.73 | 6.54 | 6.87 | 6.87 | 7.04 | 7.09 | 7.26 |
| TC0202003 | NEB             | 4703      | nebulin                                    | 1.41E-05 | 4 | 2.96 | 2.82 | 2.82 | 2.78 | 2.79 | 2.80 | 2.79 | 2.83 |
| TC0600952 | NEDD9           | 4739      | neural precursor cell expressed, develo    | 9.68E-09 | 4 | 8.01 | 7.24 | 6.81 | 7.04 | 7.02 | 7.30 | 7.30 | 7.59 |
| TC1201121 | NELL2           | 4753      | NEL-like 2 (chicken)                       | 7.27E-05 | 4 | 3.23 | 3.05 | 3.09 | 3.00 | 2.99 | 2.96 | 3.02 | 3.05 |
| TC1600558 | NFAT5           | 10725     | nuclear factor of activated T-cells 5, tor | 3.15E-05 | 4 | 6.82 | 6.34 | 6.15 | 6.32 | 6.20 | 6.21 | 6.29 | 6.27 |
| TC0700126 | NFE2L3          | 9603      | nuclear factor (erythroid-derived 2)-lik   | 0.000283 | 4 | 4.05 | 3.56 | 3.61 | 3.71 | 3.68 | 3.65 | 3.75 | 3.68 |
| TC1901422 | NFKBID /// NP_  | 84807     | nuclear factor of kappa light polypeptic   | 0.000917 | 4 | 5.05 | 4.91 | 4.87 | 4.78 | 4.89 | 4.93 | 4.81 | 4.87 |
| TC1101969 | NFRKB           | 4798      | nuclear factor related to kappaB bindin    | 0.000606 | 4 | 5.11 | 4.90 | 4.81 | 4.78 | 4.84 | 4.93 | 4.93 | 4.85 |
| TC0400924 | NFXL1           | 152518    | nuclear transcription factor, X-box bind   | 0.000206 | 4 | 6.16 | 4.44 | 4.41 | 5.05 | 4.94 | 5.11 | 5.08 | 5.30 |
| TC0600376 | NFYA            | 4800      | nuclear transcription factor Y, alpha      | 9.45E-05 | 4 | 6.72 | 6.63 | 6.41 | 6.36 | 6.35 | 6.47 | 6.46 | 6.50 |
| TC0301068 | NGLY1           | 55768     | N-glycanase 1 /// Peptide-N(4)-(N-acet     | 4.67E-07 | 4 | 6.30 | 5.92 | 6.32 | 6.10 | 5.99 | 6.07 | 6.19 | 6.03 |
| TC0X00072 | NHS             | 4810      | Nance-Horan syndrome (congenital cat       | 5.22E-23 | 4 | 5.78 | 4.48 | 4.17 | 4.30 | 4.38 | 4.83 | 4.86 | 5.06 |
| TC0X00346 | NHSL2           | 340527    | NHS-like 2                                 | 3.26E-09 | 4 | 7.22 | 6.04 | 5.97 | 6.31 | 6.11 | 6.37 | 6.33 | 6.57 |
| TC1601123 | NIP30           | 80011     | NEFA-interacting nuclear protein NIP30     | 3.13E-10 | 4 | 7.52 | 7.10 | 7.13 | 7.19 | 7.10 | 7.21 | 7.31 | 7.34 |
| TC0500126 | NIPBL           | 25836     | Nipped-B homolog (Drosophila)              | 2.87E-06 | 4 | 8.33 | 7.85 | 7.52 | 7.51 | 7.38 | 7.62 | 7.93 | 7.90 |
| TC0300309 | NISCH           | 11188     | nischarin                                  | 3.95E-09 | 4 | 4.92 | 4.68 | 4.61 | 4.65 | 4.61 | 4.64 | 4.66 | 4.65 |
| TC0600203 | NKAPL           | 222698    | NFKB activating protein-like               | 7.92E-05 | 4 | 4.60 | 4.08 | 3.89 | 4.13 | 4.05 | 4.25 | 4.21 | 4.08 |
| TC0300195 | NKTR            | 4820      | natural killer-tumor recognition sequer    | 2.12E-16 | 4 | 7.12 | 5.62 | 5.65 | 5.67 | 5.71 | 5.85 | 6.10 | 5.89 |
| TC0800806 | NKX3-1          | 4824      | NK3 homeobox 1 /// Homeobox protei         | 1.40E-05 | 4 | 4.77 | 4.26 | 4.07 | 4.17 | 4.14 | 4.29 | 4.41 | 4.55 |
| TC0X00335 | NLGN3           | 54413     | neuroligin 3 /// Neuroigin-3 precursor     | 4.59E-14 | 4 | 4.96 | 4.35 | 4.26 | 4.29 | 4.43 | 4.46 | 4.41 | 4.41 |
| TC1600804 | NLRC3           | 197358    | NLR family, CARD domain containing 3       | 0.000238 | 4 | 4.84 | 4.70 | 4.65 | 4.68 | 4.69 | 4.67 | 4.60 | 4.67 |
| TC1700958 | NLRP1           | 730994 // | NLR family, pyrin domain containing 1      | 2.73E-31 | 4 | 7.94 | 6.14 | 5.70 | 5.76 | 5.62 | 6.02 | 6.13 | 6.27 |
| TC0701304 | NM_00103484 --- |           | Similar to Williams Beuren syndrome cl     | 1.69E-08 | 4 | 5.59 | 4.92 | 4.86 | 4.96 | 4.89 | 4.99 | 5.08 | 5.07 |
| TC1900952 | NM_138781 ---   |           | ---                                        | 8.68E-17 | 4 | 6.65 | 5.97 | 5.73 | 5.92 | 5.98 | 6.14 | 6.30 | 6.37 |
| TC1600704 | NM_182905.2 --- |           | family with sequence similarity 39, mer    | 0.000577 | 4 | 6.55 | 6.33 | 6.32 | 6.27 | 6.38 | 6.41 | 6.35 | 6.33 |
| TC0102670 | NM_207400 ---   |           | CDNA FLJ39739 fis, clone SMINT201644       | 4.20E-11 | 4 | 6.20 | 5.82 | 5.84 | 5.83 | 5.90 | 6.02 | 6.02 | 6.10 |
| TC1600816 | NMRAL1          | 57407     | NmrA-like family domain containing 1       | 0.000201 | 4 | 5.27 | 5.02 | 5.04 | 5.08 | 5.12 | 5.10 | 5.11 | 5.18 |
| TC2000027 | NOL5A           | 10528     | nucleolar protein 5A (56kDa with KKE/I     | 0.000184 | 4 | 5.04 | 4.81 | 4.83 | 4.81 | 4.85 | 4.86 | 4.95 | 4.88 |
| TC0901443 | NOTCH1          | 4851      | Notch homolog 1, translocation-associ      | 0.000528 | 4 | 6.50 | 6.13 | 5.92 | 6.04 | 6.01 | 6.12 | 6.06 | 6.19 |

|           |                                                                 |          |   |       |       |       |       |       |       |       |       |
|-----------|-----------------------------------------------------------------|----------|---|-------|-------|-------|-------|-------|-------|-------|-------|
| TC0100925 | NOTCH2NL /// 388677 // Notch homolog 2 (Drosophila) N-termi     | 3.32E-09 | 4 | 8.48  | 7.49  | 7.52  | 7.67  | 7.58  | 7.64  | 7.75  | 7.62  |
| TC0202263 | NP_001073944 --- CDNA FLJ41210 fis, clone BRALZ201448           | 3.41E-05 | 4 | 5.23  | 4.81  | 4.84  | 5.22  | 5.11  | 4.94  | 4.99  | 4.96  |
| TC0501442 | NP10_HUMAN --- HERV-K_5q33.3 provirus Np9 protein (f            | 2.74E-05 | 4 | 6.87  | 6.40  | 6.44  | 6.35  | 6.13  | 6.28  | 6.36  | 6.28  |
| TC0102836 | NP12_HUMAN --- HERV-K_1q22 provirus Np9 protein (HE             | 2.69E-14 | 4 | 6.25  | 5.04  | 4.93  | 5.12  | 5.02  | 5.45  | 5.65  | 5.86  |
| TC2000412 | NPEPL1 /// STX79716 /// aminopeptidase-like 1 /// syntaxin 16 / | 1.86E-18 | 4 | 6.47  | 5.98  | 5.98  | 5.98  | 5.96  | 5.93  | 5.84  | 5.82  |
| TC1600201 | NPIP /// Q6ZM 9284 nuclear pore complex interacting prote       | 0.000386 | 4 | 5.30  | 5.11  | 5.11  | 5.05  | 5.10  | 5.05  | 5.10  | 5.03  |
| TC0101346 | NPL 80896 N-acetylneuraminase pyruvate lyase (d                 | 5.37E-06 | 4 | 7.76  | 7.02  | 7.14  | 7.23  | 7.14  | 7.46  | 7.38  | 7.42  |
| TC0700062 | NR_002217.1 --- PMS2-C terminal-like (PMS2CL) on chrC           | 0.000969 | 4 | 4.56  | 4.33  | 4.37  | 4.28  | 4.34  | 4.30  | 4.41  | 4.36  |
| TC2200199 | NR_002323.1 --- taurine upregulated gene 1 (TUG1) on C          | 2.58E-10 | 4 | 9.27  | 8.65  | 8.50  | 8.59  | 8.64  | 8.87  | 8.94  | 8.83  |
| TC1601005 | NR_002453.4 --- PI-3-kinase-related kinase SMG-1 pseud          | 1.17E-06 | 4 | 7.64  | 7.04  | 6.94  | 6.92  | 6.96  | 7.03  | 7.14  | 7.04  |
| TC2200720 | NR_002570.2 --- cytochrome P450, family 2, subfamily C          | 0.000674 | 4 | 5.04  | 4.82  | 4.82  | 4.80  | 4.81  | 4.81  | 4.78  | 4.82  |
| TC1600983 | NR_002603.1 --- nuclear pore complex interacting prote          | 6.88E-10 | 4 | 7.71  | 6.62  | 6.33  | 6.30  | 6.50  | 6.41  | 6.73  | 6.57  |
| TC1101492 | NR_002761.1 --- RNA, U2B small nuclear (RNU2B) on chr           | 0.000468 | 4 | 4.68  | 4.25  | 4.39  | 4.21  | 4.76  | 4.69  | 4.77  | 4.05  |
| TC1100544 | NR_002819.1 --- metastasis associated lung adenocarcin          | 4.59E-06 | 4 | 10.98 | 10.40 | 10.44 | 10.35 | 10.38 | 10.50 | 10.50 | 10.54 |
| TC1400537 | NR_003204.1 --- small nucleolar RNA, C/D box 114-11 (S          | 0.000641 | 4 | 2.78  | 2.31  | 2.39  | 2.11  | 2.25  | 2.22  | 2.32  | 2.21  |
| TC1500080 | NR_003307.1 --- small nucleolar RNA, C/D box 115-15 (S          | 3.43E-05 | 4 | 2.29  | 1.71  | 1.85  | 1.78  | 1.77  | 1.63  | 1.68  | 1.70  |
| TC0500076 | NR_003656.1 --- glucuronidase, beta pseudogene 1 (GU            | 0.000102 | 4 | 8.97  | 8.66  | 8.68  | 8.65  | 8.72  | 8.73  | 8.64  | 8.69  |
| TC2000495 | NSFL1C 55968 NSFL1 (p97) cofactor (p47) /// NSFL1 co            | 9.01E-06 | 4 | 7.83  | 7.13  | 7.25  | 7.38  | 7.23  | 7.30  | 7.38  | 7.43  |
| TC0700407 | NSUN5B 155400 NOL1/NOP2/Sun domain family, memb                 | 3.95E-07 | 4 | 5.57  | 5.32  | 5.32  | 5.35  | 5.44  | 5.43  | 5.44  | 5.37  |
| TC0701306 | NSUN5C 260294 NOL1/NOP2/Sun domain family, memb                 | 5.89E-05 | 4 | 5.41  | 5.22  | 5.24  | 5.24  | 5.33  | 5.31  | 5.35  | 5.30  |
| TC0200587 | NT5DC4 --- 5'-nucleotidase domain-containing pro                | 5.18E-07 | 4 | 4.35  | 4.16  | 4.17  | 4.07  | 4.05  | 4.11  | 4.11  | 4.12  |
| TC0103161 | NUAK2 /// C11 81788 /// NUA family, SNF1-like kinase, 2 /// chr | 1.03E-05 | 4 | 7.91  | 7.16  | 7.00  | 7.12  | 6.95  | 7.34  | 7.25  | 7.48  |
| TC1000334 | NUDT13 25961 nudix (nucleoside diphosphate linked n             | 8.57E-05 | 4 | 4.20  | 3.92  | 3.83  | 3.81  | 3.83  | 3.88  | 4.02  | 3.92  |
| TC0900646 | NUP214 8021 nucleoporin 214kDa /// Nuclear pore co              | 6.50E-09 | 4 | 6.78  | 6.10  | 6.10  | 6.23  | 6.16  | 6.29  | 6.35  | 6.40  |
| TC1101095 | NUP98 4928 nucleoporin 98kDa /// Nuclear pore co                | 1.03E-07 | 4 | 7.49  | 7.43  | 6.93  | 6.94  | 6.87  | 7.10  | 7.06  | 7.13  |
| TC1101488 | NXF1 10482 nuclear RNA export factor 1                          | 8.83E-09 | 4 | 8.02  | 7.05  | 6.93  | 6.93  | 6.98  | 7.03  | 7.12  | 7.04  |
| TC1600196 | O15103_HUMAN ---                                                | 3.22E-09 | 4 | 6.05  | 4.75  | 4.66  | 4.57  | 4.78  | 4.72  | 5.16  | 4.85  |
| TC1501030 | OAZ2 4947 ornithine decarboxylase antizyme 2                    | 0.000137 | 4 | 7.39  | 6.66  | 6.85  | 6.97  | 6.76  | 6.98  | 7.00  | 7.11  |
| TC0901408 | OBP2B 29989 odorant binding protein 2B /// Odoran               | 0.00043  | 4 | 5.50  | 5.30  | 5.31  | 5.27  | 5.30  | 5.28  | 5.21  | 5.33  |
| TC0600499 | OGFRL1 79627 opioid growth factor receptor-like 1               | 1.75E-19 | 4 | 8.92  | 7.72  | 7.49  | 7.65  | 7.67  | 8.23  | 8.21  | 8.55  |
| TC0X00341 | OGT 8473 O-linked N-acetylglucosamine (GlcNAc)                  | 1.32E-14 | 4 | 8.20  | 7.06  | 7.11  | 6.95  | 6.90  | 6.85  | 6.97  | 6.78  |
| TC1100341 | OR4C46 119749 olfactory receptor, family 4, subfamily           | 0.000622 | 4 | 2.40  | 2.04  | 1.98  | 1.89  | 1.95  | 1.96  | 1.92  | 2.14  |
| TC1100080 | OR52K1 390036 olfactory receptor, family 52, subfamily          | 5.14E-12 | 4 | 4.73  | 3.35  | 3.06  | 3.30  | 3.25  | 3.81  | 3.49  | 3.76  |
| TC1100078 | OR52K2 119774 olfactory receptor, family 52, subfamily          | 5.82E-11 | 4 | 3.90  | 2.73  | 2.63  | 2.56  | 2.81  | 2.91  | 2.91  | 3.03  |

|           |                 |        |                                          |          |   |       |       |       |       |       |       |       |       |
|-----------|-----------------|--------|------------------------------------------|----------|---|-------|-------|-------|-------|-------|-------|-------|-------|
| TC0202174 | ORMDL1          | 94101  | ORM1-like 1 ( <i>S. cerevisiae</i> )     | 1.32E-10 | 4 | 5.48  | 4.57  | 4.76  | 4.71  | 4.78  | 4.75  | 4.89  | 4.80  |
| TC0X00907 | OTUD5           | 55593  | OTU domain containing 5 /// OTU dom      | 6.77E-14 | 4 | 7.72  | 7.05  | 6.77  | 7.02  | 7.01  | 7.11  | 7.17  | 7.24  |
| TC1400430 | P1768_HUMAN --- |        | Protein PRO1768. [Source:Uniprot/SWI     | 4.20E-11 | 4 | 4.28  | 2.90  | 2.96  | 2.96  | 3.05  | 3.02  | 3.09  | 3.35  |
| TC1700927 | P2RX1           | 5023   | purinergic receptor P2X, ligand-gated ic | 2.68E-05 | 4 | 6.34  | 5.56  | 5.52  | 5.52  | 5.58  | 5.45  | 5.47  | 5.39  |
| TC0X00380 | P2RY10          | 27334  | purinergic receptor P2Y, G-protein couj  | 2.69E-21 | 4 | 6.13  | 3.33  | 3.16  | 4.16  | 3.67  | 4.31  | 4.83  | 5.17  |
| TC0301669 | P2RY13          | 53829  | purinergic receptor P2Y, G-protein couj  | 8.51E-05 | 4 | 10.73 | 10.40 | 10.60 | 10.42 | 10.31 | 10.49 | 10.40 | 10.53 |
| TC1100653 | P2RY6           | 5031   | pyrimidinergic receptor P2Y, G-protein   | 0.000275 | 4 | 4.46  | 4.22  | 4.22  | 4.17  | 4.12  | 4.20  | 4.17  | 4.19  |
| TC1600775 | P461_HUMAN ---  |        | Protein PRO0461. [Source:Uniprot/SWI     | 8.26E-06 | 4 | 9.82  | 9.31  | 9.11  | 9.17  | 9.13  | 9.21  | 9.23  | 9.34  |
| TC1600771 | P461_HUMAN ---  |        | Protein PRO0461. [Source:Uniprot/SWI     | 4.26E-05 | 4 | 8.29  | 7.95  | 7.76  | 7.81  | 7.69  | 7.78  | 7.86  | 7.92  |
| TC2000741 | P628_HUMAN ---  |        | Protein PRO0628. [Source:Uniprot/SWI     | 9.02E-05 | 4 | 3.40  | 2.72  | 2.45  | 2.60  | 2.65  | 2.73  | 2.97  | 3.14  |
| TC2000305 | PABPC1L /// C2  | 80336  | poly(A) binding protein, cytoplasmic 1-  | 2.18E-25 | 4 | 5.30  | 4.45  | 4.47  | 4.49  | 4.59  | 4.53  | 4.54  | 4.47  |
| TC1100565 | PACS1           | 55690  | phosphofurin acidic cluster sorting prot | 1.16E-05 | 4 | 8.01  | 7.11  | 6.93  | 7.12  | 7.05  | 7.29  | 7.27  | 7.40  |
| TC1101684 | PAK1            | 5058   | p21 protein (Cdc42/Rac)-activated kina   | 4.05E-07 | 4 | 9.50  | 8.74  | 8.83  | 8.89  | 8.78  | 9.07  | 9.09  | 9.31  |
| TC1300057 | PAN3            | 255967 | PAN3 polyA specific ribonuclease subu    | 3.29E-12 | 4 | 7.66  | 6.88  | 6.80  | 6.86  | 6.75  | 6.94  | 6.98  | 7.01  |
| TC0101792 | PANK4           | 55229  | pantothenate kinase 4                    | 1.50E-10 | 4 | 5.69  | 5.23  | 5.16  | 5.32  | 5.28  | 5.32  | 5.32  | 5.36  |
| TC0500166 | PARP8 /// A2RI  | 79668  | poly (ADP-ribose) polymerase family, n   | 1.87E-09 | 4 | 9.11  | 8.40  | 8.49  | 8.47  | 8.42  | 8.70  | 8.70  | 8.84  |
| TC2200347 | PARVG           | 64098  | parvin, gamma                            | 7.56E-10 | 4 | 7.94  | 7.09  | 7.10  | 7.16  | 7.16  | 7.20  | 7.26  | 7.22  |
| TC1001022 | PBLD            | 64081  | phenazine biosynthesis-like protein doi  | 0.000122 | 4 | 3.68  | 3.42  | 3.47  | 3.49  | 3.47  | 3.54  | 3.56  | 3.55  |
| TC0601150 | PBX2            | 5089   | pre-B-cell leukemia homeobox 2           | 1.24E-11 | 4 | 7.25  | 6.37  | 6.25  | 6.29  | 6.37  | 6.43  | 6.34  | 6.44  |
| TC1100714 | PCF11           | 51585  | PCF11, cleavage and polyadenylation fa   | 0.000293 | 4 | 7.08  | 6.69  | 6.57  | 6.61  | 6.54  | 6.76  | 6.85  | 6.85  |
| TC2000478 | PCMTD2          | 55251  | protein-L-isoaspartate (D-aspartate) O-  | 1.68E-15 | 4 | 6.09  | 5.12  | 5.11  | 5.41  | 5.32  | 5.50  | 5.66  | 5.68  |
| TC1100550 | PCNXL3          | 399909 | pecanex-like 3 ( <i>Drosophila</i> )     | 0.000228 | 4 | 5.25  | 5.06  | 5.05  | 5.04  | 5.04  | 5.09  | 5.01  | 5.06  |
| TC1101863 | PCSK7           | 9159   | proprotein convertase subtilisin/kexin 1 | 5.76E-11 | 4 | 5.18  | 4.77  | 4.74  | 4.81  | 4.77  | 4.81  | 4.80  | 4.75  |
| TC1100194 | PDE3B           | 5140   | phosphodiesterase 3B, cGMP-inhibited     | 3.58E-09 | 4 | 6.92  | 6.86  | 6.16  | 6.15  | 6.02  | 6.27  | 6.30  | 6.54  |
| TC0100628 | PDE4B           | 5142   | phosphodiesterase 4B, cAMP-specific (l   | 2.32E-16 | 4 | 5.68  | 5.16  | 4.55  | 4.77  | 4.75  | 5.24  | 5.22  | 5.53  |
| TC1601211 | PDXDC2 ---      |        | pyridoxal-dependent decarboxylase do     | 1.10E-09 | 4 | 4.94  | 4.39  | 4.28  | 4.32  | 4.45  | 4.44  | 4.56  | 4.42  |
| TC0500097 | PDZD2           | 23037  | PDZ domain containing 2 /// PDZ doma     | 1.33E-05 | 4 | 3.86  | 3.68  | 3.66  | 3.69  | 3.69  | 3.66  | 3.65  | 3.67  |
| TC1100917 | PDZD3           | 79849  | PDZ domain containing 3 /// PDZ doma     | 0.000288 | 4 | 4.21  | 4.03  | 4.01  | 3.96  | 4.00  | 4.02  | 3.98  | 4.04  |
| TC1701617 | PECAM1          | 5175   | platelet/endothelial cell adhesion mole  | 9.66E-11 | 4 | 10.07 | 8.71  | 8.97  | 9.25  | 8.95  | 9.36  | 9.42  | 9.56  |
| TC0201566 | PELI1           | 57162  | pellino homolog 1 ( <i>Drosophila</i> )  | 1.93E-12 | 4 | 8.72  | 8.62  | 8.05  | 7.92  | 7.88  | 8.19  | 8.19  | 8.40  |
| TC0601273 | PEX6            | 5190   | peroxisomal biogenesis factor 6 /// Per  | 1.51E-05 | 4 | 5.13  | 4.84  | 4.87  | 4.88  | 4.92  | 4.88  | 4.81  | 4.84  |
| TC0600309 | PFDN6           | 10471  | prefoldin subunit 6                      | 7.78E-08 | 4 | 5.14  | 4.53  | 4.62  | 4.76  | 4.84  | 4.80  | 4.86  | 4.79  |
| TC0701167 | PGAM2           | 5224   | phosphoglycerate mutase 2 (muscle)       | 1.11E-10 | 4 | 5.98  | 5.27  | 5.22  | 5.11  | 5.17  | 5.10  | 5.15  | 5.06  |
| TC1500194 | PGBD4           | 161779 | piggyBac transposable element derived    | 2.69E-06 | 4 | 4.38  | 3.74  | 3.79  | 3.95  | 3.99  | 4.14  | 4.18  | 4.01  |

|           |                        |                                                 |          |   |      |      |      |      |      |      |      |      |
|-----------|------------------------|-------------------------------------------------|----------|---|------|------|------|------|------|------|------|------|
| TC0800446 | PGCP /// NP_010404     | plasma glutamate carboxypeptidase               | 0.000115 | 4 | 7.87 | 7.09 | 7.21 | 7.36 | 7.21 | 7.26 | 7.30 | 7.42 |
| TC0600312 | PHF1                   | 5252 PHD finger protein 1                       | 1.81E-12 | 4 | 6.55 | 6.47 | 6.07 | 6.01 | 6.05 | 6.27 | 6.25 | 6.34 |
| TC0500482 | PHF15                  | 23338 PHD finger protein 15 /// Protein Jade-   | 2.12E-09 | 4 | 5.31 | 5.01 | 4.96 | 5.01 | 4.95 | 5.02 | 5.11 | 5.24 |
| TC0400530 | PHF17                  | 79960 PHD finger protein 17                     | 0.000965 | 4 | 6.35 | 6.10 | 6.09 | 5.89 | 5.78 | 6.00 | 6.06 | 6.10 |
| TC0601413 | PHIP                   | 55023 pleckstrin homology domain interactin     | 3.48E-07 | 4 | 7.27 | 6.96 | 6.78 | 6.66 | 6.59 | 6.70 | 6.88 | 6.79 |
| TC1601234 | PHLPPL                 | 23035 PH domain and leucine rich repeat prot    | 0.000547 | 4 | 3.62 | 3.43 | 3.40 | 3.40 | 3.43 | 3.43 | 3.44 | 3.52 |
| TC1701500 | PHOSPHO1               | 162466 phosphatase, orphan 1                    | 2.44E-13 | 4 | 6.35 | 4.87 | 4.74 | 5.01 | 5.22 | 5.42 | 5.44 | 5.53 |
| TC2200462 | PI4KA                  | 5297 phosphatidylinositol 4-kinase, catalytic   | 4.06E-06 | 4 | 5.84 | 5.43 | 5.23 | 5.33 | 5.36 | 5.35 | 5.47 | 5.43 |
| TC2200478 | PI4KAP2                | 375133 phosphatidylinositol 4-kinase, catalytic | 1.02E-05 | 4 | 6.01 | 5.80 | 5.74 | 5.78 | 5.80 | 5.81 | 5.77 | 5.79 |
| TC0102744 | PI4KB                  | 5298 phosphatidylinositol 4-kinase, catalytic   | 6.02E-13 | 4 | 6.01 | 5.33 | 5.25 | 5.44 | 5.42 | 5.47 | 5.50 | 5.58 |
| TC2200270 | PICK1                  | 9463 protein interacting with PRKCA 1           | 0.000815 | 4 | 4.77 | 4.55 | 4.63 | 4.51 | 4.59 | 4.61 | 4.56 | 4.61 |
| TC1500353 | PIGB                   | 9488 phosphatidylinositol glycan anchor bio     | 1.56E-17 | 4 | 6.92 | 5.37 | 5.56 | 5.95 | 5.94 | 6.17 | 6.31 | 6.31 |
| TC0400006 | PIGG                   | 54872 phosphatidylinositol glycan anchor bio    | 2.26E-08 | 4 | 4.97 | 4.53 | 4.56 | 4.62 | 4.60 | 4.52 | 4.60 | 4.56 |
| TC2200596 | PIK3IP1                | 113791 phosphoinositide-3-kinase interacting p  | 2.92E-07 | 4 | 5.47 | 4.96 | 4.70 | 4.94 | 4.92 | 4.95 | 4.96 | 4.97 |
| TC0301560 | PIK3R4                 | 30849 phosphoinositide-3-kinase, regulatory s   | 4.06E-08 | 4 | 4.57 | 4.21 | 4.11 | 4.27 | 4.10 | 4.28 | 4.39 | 4.50 |
| TC1701021 | PIK3R5                 | 23533 phosphoinositide-3-kinase, regulatory s   | 0.000748 | 4 | 7.03 | 6.52 | 6.37 | 6.58 | 6.59 | 6.62 | 6.58 | 6.69 |
| TC1701020 | PIK3R6                 | 146850 phosphoinositide-3-kinase, regulatory s  | 4.08E-15 | 4 | 5.75 | 4.84 | 4.85 | 5.17 | 5.08 | 5.22 | 5.35 | 5.35 |
| TC0X00906 | PIM2                   | 11040 pim-2 oncogene                            | 4.29E-09 | 4 | 5.53 | 5.52 | 4.78 | 4.91 | 4.97 | 5.36 | 5.33 | 5.57 |
| TC2200602 | PISD                   | 23761 phosphatidylserine decarboxylase /// P    | 1.53E-05 | 4 | 5.94 | 5.35 | 5.35 | 5.50 | 5.55 | 5.60 | 5.44 | 5.56 |
| TC1700888 | PITPNA                 | 5306 phosphatidylinositol transfer protein, a   | 1.61E-09 | 4 | 8.54 | 8.11 | 7.59 | 7.84 | 7.62 | 8.04 | 8.16 | 8.29 |
| TC0100706 | PKN2                   | 5586 protein kinase N2 /// Serine/threonine     | 1.82E-19 | 4 | 8.32 | 6.95 | 6.85 | 7.02 | 7.03 | 7.47 | 7.56 | 7.70 |
| TC2200660 | PLA2G6                 | 8398 phospholipase A2, group VI (cytosolic, c   | 8.19E-06 | 4 | 4.41 | 4.21 | 4.19 | 4.20 | 4.23 | 4.20 | 4.15 | 4.22 |
| TC2100357 | PLAC4                  | 191585 placenta-specific 4                      | 0.000336 | 4 | 3.61 | 2.93 | 2.94 | 3.08 | 3.02 | 3.12 | 3.07 | 3.26 |
| TC0601661 | PLAGL1                 | 5325 pleiomorphic adenoma gene-like 1           | 9.85E-16 | 4 | 4.66 | 3.87 | 3.88 | 3.89 | 3.70 | 3.88 | 4.06 | 4.00 |
| TC2000068 | PLCB1                  | 23236 phospholipase C, beta 1 (phosphoinosit    | 9.49E-08 | 4 | 3.77 | 3.51 | 3.47 | 3.50 | 3.47 | 3.53 | 3.66 | 3.63 |
| TC1500839 | PLCB2                  | 5330 phospholipase C, beta 2                    | 2.74E-16 | 4 | 7.87 | 6.57 | 6.58 | 6.75 | 6.70 | 6.79 | 6.79 | 6.80 |
| TC1400301 | PLEKHG3                | 26030 pleckstrin homology domain containin      | 2.36E-22 | 4 | 6.73 | 5.60 | 5.35 | 5.63 | 5.71 | 5.98 | 5.95 | 6.14 |
| TC1701446 | PLEKHM1                | 9842 pleckstrin homology domain containin       | 0.000182 | 4 | 6.69 | 6.40 | 6.14 | 6.25 | 6.25 | 6.24 | 6.20 | 6.21 |
| TC0101005 | PLEKHO1                | 51177 pleckstrin homology domain containin      | 6.56E-21 | 4 | 6.63 | 5.38 | 5.23 | 5.44 | 5.42 | 5.75 | 5.92 | 6.20 |
| TC0600862 | PLG                    | 5340 plasminogen /// Plasminogen precurso       | 3.25E-09 | 4 | 3.38 | 3.16 | 3.13 | 3.05 | 3.11 | 3.07 | 3.05 | 3.08 |
| TC0200552 | PLGLA1                 | --- Plasminogen-like A1. [Source:Uniprot/       | 2.42E-06 | 4 | 2.87 | 2.45 | 2.44 | 2.37 | 2.46 | 2.50 | 2.48 | 2.52 |
| TC0200436 | PLGLB1                 | 5343 plasminogen-like B1                        | 2.41E-08 | 4 | 3.93 | 3.02 | 3.10 | 3.13 | 3.16 | 3.29 | 3.29 | 3.25 |
| TC0201694 | PLGLB1 /// PLG5343 /// | plasminogen-like B1 /// plasminogen-li          | 7.69E-10 | 4 | 4.15 | 3.19 | 3.23 | 3.28 | 3.26 | 3.42 | 3.44 | 3.39 |
| TC0600681 | PLN                    | 5350 phospholamban                              | 3.81E-08 | 4 | 3.47 | 2.74 | 2.87 | 3.08 | 3.05 | 3.06 | 3.20 | 3.04 |



|           |          |               |                                            |          |   |      |      |      |      |      |      |      |      |
|-----------|----------|---------------|--------------------------------------------|----------|---|------|------|------|------|------|------|------|------|
| TC1000098 | PLXDC2   | 84898         | plexin domain containing 2 /// Plexin d    | 6.32E-06 | 4 | 8.05 | 7.62 | 7.43 | 7.91 | 7.28 | 7.75 | 7.68 | 7.96 |
| TC0103196 | PLXNA2   | 5362          | plexin A2                                  | 1.44E-09 | 4 | 4.64 | 4.27 | 4.17 | 4.18 | 4.15 | 4.23 | 4.26 | 4.37 |
| TC0900698 | PMPCA    | 23203         | peptidase (mitochondrial processing) a     | 0.00013  | 4 | 4.19 | 4.01 | 3.96 | 4.00 | 4.04 | 4.06 | 4.04 | 4.01 |
| TC0701285 | PMS2L4   | ---           | PMS6 protein (HPMS6 protein) (Fragme       | 5.87E-05 | 4 | 5.06 | 4.65 | 4.66 | 4.77 | 4.71 | 4.78 | 4.82 | 4.73 |
| TC2100412 | POFUT2   | 23275         | protein O-fucosyltransferase 2             | 2.37E-07 | 4 | 4.42 | 4.21 | 4.07 | 4.04 | 4.07 | 4.10 | 4.05 | 4.09 |
| TC1100537 | POLA2    | 23649         | polymerase (DNA directed), alpha 2 (7C     | 3.25E-05 | 4 | 4.81 | 4.37 | 4.17 | 4.32 | 4.47 | 4.49 | 4.51 | 4.52 |
| TC1700098 | POLR2A   | 5430          | polymerase (RNA) II (DNA directed) pol     | 0.000184 | 4 | 7.81 | 7.21 | 7.10 | 7.57 | 7.45 | 7.35 | 7.43 | 7.41 |
| TC1900991 | POLR2E   | 5434          | polymerase (RNA) II (DNA directed) pol     | 5.16E-05 | 4 | 5.03 | 4.49 | 4.56 | 4.65 | 4.65 | 4.60 | 4.68 | 4.71 |
| TC0701512 | POLR2J3  | /// PC 652668 | // RPB11b2 protein /// DNA directed RNA    | 1.66E-09 | 4 | 6.02 | 5.73 | 5.74 | 5.77 | 5.78 | 5.80 | 5.77 | 5.77 |
| TC1500486 | PPCDC    | 60490         | phosphopantothenoylcysteine decarbc        | 4.32E-15 | 4 | 6.17 | 5.33 | 5.24 | 5.18 | 5.17 | 5.58 | 5.55 | 5.79 |
| TC1100624 | PPFIA1   | 8500          | protein tyrosine phosphatase, receptor     | 9.04E-07 | 4 | 6.87 | 6.48 | 6.21 | 6.46 | 6.54 | 6.65 | 6.64 | 6.64 |
| TC1100145 | PPFIBP2  | 8495          | PTPRF interacting protein, binding prot    | 0.000627 | 4 | 4.75 | 4.61 | 4.40 | 4.48 | 4.51 | 4.58 | 4.44 | 4.61 |
| TC1200261 | PPHLN1   | 51535         | periphilin 1 /// Periphilin-1 (Gastric can | 0.000741 | 4 | 5.83 | 5.82 | 5.66 | 5.58 | 5.59 | 5.69 | 5.78 | 5.81 |
| TC1600825 | PPL      | 5493          | periplakin                                 | 2.93E-07 | 4 | 5.21 | 4.86 | 4.83 | 4.86 | 4.88 | 4.90 | 4.82 | 4.94 |
| TC2200486 | PPM1F    | 9647          | protein phosphatase 1F (PP2C domain        | 2.39E-14 | 4 | 6.59 | 5.77 | 5.79 | 5.95 | 5.85 | 5.96 | 5.96 | 6.08 |
| TC0101205 | PPOX     | 5498          | protoporphyrinogen oxidase                 | 0.000134 | 4 | 4.46 | 4.27 | 4.27 | 4.26 | 4.31 | 4.30 | 4.23 | 4.29 |
| TC0600237 | PPP1R11  | 6992          | protein phosphatase 1, regulatory (inhi    | 1.49E-05 | 4 | 4.87 | 4.50 | 4.53 | 4.49 | 4.42 | 4.58 | 4.58 | 4.69 |
| TC0101424 | PPP1R12B | 4660          | protein phosphatase 1, regulatory (inhi    | 5.14E-12 | 4 | 6.15 | 5.41 | 5.05 | 5.15 | 5.36 | 5.56 | 5.56 | 5.57 |
| TC2000863 | PPP4R1L  | /// PP---     | Serine/threonine-protein phosphatase       | 3.75E-05 | 4 | 5.52 | 5.06 | 4.82 | 4.87 | 4.91 | 5.02 | 4.94 | 4.83 |
| TC2000815 | PREX1    | 57580         | phosphatidylinositol 3,4,5-trisphosphat    | 0.000367 | 4 | 8.51 | 8.11 | 7.77 | 7.98 | 7.88 | 7.89 | 7.88 | 8.02 |
| TC0101362 | PRG4     | 10216         | proteoglycan 4 /// Proteoglycan-4 prec     | 0.000219 | 4 | 2.90 | 2.67 | 2.65 | 2.64 | 2.63 | 2.73 | 2.72 | 2.69 |
| TC0100049 | PRKCZ    | 5590          | protein kinase C, zeta /// Protein kinas   | 4.09E-05 | 4 | 5.60 | 5.24 | 5.25 | 5.33 | 5.31 | 5.42 | 5.44 | 5.47 |
| TC1901629 | PRKD2    | 25865         | protein kinase D2                          | 2.17E-08 | 4 | 7.27 | 6.95 | 6.51 | 6.68 | 6.75 | 6.98 | 6.93 | 7.11 |
| TC2000217 | PROCR    | 10544         | protein C receptor, endothelial (EPCR)     | 2.05E-05 | 4 | 4.32 | 4.13 | 4.03 | 4.04 | 4.08 | 4.10 | 4.05 | 4.10 |
| TC0100823 | PROK1    | 84432         | prokineticin 1                             | 0.000904 | 4 | 5.11 | 5.09 | 4.99 | 4.92 | 4.94 | 5.07 | 4.94 | 5.14 |
| TC0101014 | PRPF3    | 9129          | PRP3 pre-mRNA processing factor 3 ho       | 1.09E-14 | 4 | 6.56 | 5.59 | 5.50 | 5.39 | 5.37 | 5.47 | 5.61 | 5.53 |
| TC0600035 | PRPF4B   | 8899          | PRP4 pre-mRNA processing factor 4 ho       | 3.71E-07 | 4 | 5.50 | 4.72 | 4.82 | 4.97 | 5.00 | 4.98 | 5.21 | 5.05 |
| TC1700894 | PRPF8    | 10594         | PRP8 pre-mRNA processing factor 8 ho       | 5.32E-05 | 4 | 7.42 | 6.98 | 6.68 | 6.84 | 6.87 | 6.93 | 7.02 | 6.96 |
| TC0500422 | PRR16    | 51334         | proline rich 16                            | 0.000473 | 4 | 4.67 | 4.52 | 4.51 | 4.46 | 4.54 | 4.52 | 4.44 | 4.52 |
| TC0600246 | PRR3     | 80742         | proline rich 3 /// Proline-rich protein 3  | 3.96E-06 | 4 | 4.44 | 4.00 | 4.00 | 4.08 | 4.10 | 4.18 | 4.17 | 4.21 |
| TC1701750 | PSCD1    | 9267          | pleckstrin homology, Sec7 and coiled-c     | 1.09E-10 | 4 | 8.32 | 7.74 | 7.55 | 7.68 | 7.66 | 7.80 | 7.88 | 7.88 |
| TC0200596 | PSD4     | 23550         | pleckstrin and Sec7 domain containing      | 5.10E-07 | 4 | 6.26 | 5.71 | 5.64 | 5.86 | 5.84 | 5.90 | 5.89 | 6.02 |
| TC1601186 | PSMB10   | /// CT 5699   | /// 1 proteasome (prosome, macropain) sub  | 3.77E-16 | 4 | 6.02 | 5.37 | 5.28 | 5.43 | 5.42 | 5.61 | 5.61 | 5.75 |
| TC1701383 | PSMC3IP  | 29893         | PSMC3 interacting protein                  | 2.23E-09 | 4 | 5.85 | 5.46 | 5.37 | 5.44 | 5.48 | 5.43 | 5.58 | 5.52 |

|           |                         |        |                                          |          |   |      |      |      |      |      |      |      |      |
|-----------|-------------------------|--------|------------------------------------------|----------|---|------|------|------|------|------|------|------|------|
| TC1700475 | PSME3                   | 10197  | proteasome (prosome, macropain) acti     | 0.000584 | 4 | 7.83 | 7.18 | 7.28 | 7.31 | 7.34 | 7.22 | 7.14 | 7.33 |
| TC0201517 | PSME4                   | 23198  | proteasome (prosome, macropain) acti     | 4.26E-10 | 4 | 5.95 | 5.38 | 5.25 | 5.36 | 5.22 | 5.46 | 5.62 | 5.58 |
| TC0102046 | PTAFR                   | 5724   | platelet-activating factor receptor      | 1.00E-08 | 4 | 8.11 | 7.66 | 7.69 | 7.86 | 7.69 | 7.82 | 7.81 | 7.96 |
| TC1900732 | PTOV1                   | 53635  | prostate tumor overexpressed gene 1 /    | 3.13E-08 | 4 | 6.33 | 5.90 | 5.88 | 6.09 | 6.08 | 6.05 | 6.01 | 6.07 |
| TC0400163 | PTTG2 /// NM_           | 10744  | pituitary tumor-transforming 2 /// pitu  | 9.16E-15 | 4 | 6.39 | 4.65 | 4.36 | 4.95 | 5.09 | 5.23 | 5.36 | 5.46 |
| TC0700538 | PVRIG /// STAC79037 /// |        | poliovirus receptor related immunoglol   | 4.98E-10 | 4 | 4.59 | 4.42 | 4.29 | 4.31 | 4.34 | 4.31 | 4.32 | 4.35 |
| TC1101519 | PYGM                    | 5837   | phosphorylase, glycogen; muscle (McA     | 1.86E-05 | 4 | 4.45 | 4.08 | 4.07 | 4.17 | 4.14 | 4.12 | 4.13 | 4.11 |
| TC1300348 | Q5T6R2_HUM#             | 651239 | OTTHUMP00000018135. [Source:Unipr        | 0.000984 | 4 | 4.08 | 3.95 | 3.99 | 3.87 | 3.88 | 3.98 | 3.96 | 3.98 |
| TC1701277 | Q6JHZ5_HUM# ---         |        | NS5ATP13TP1. [Source:Uniprot/SPTRE#      | 0.000373 | 4 | 5.92 | 5.90 | 5.43 | 5.49 | 5.37 | 5.27 | 5.58 | 5.81 |
| TC0701141 | Q6PIW0_HUM# ---         |        | TRGV7 protein. [Source:Uniprot/SPTRE     | 7.81E-05 | 4 | 5.83 | 5.46 | 5.44 | 5.41 | 5.59 | 5.54 | 5.57 | 5.51 |
| TC0800713 | Q6SA06_HUM# ---         |        | Liver-related low express protein 1. [So | 0.000132 | 4 | 6.11 | 4.81 | 4.73 | 4.68 | 4.79 | 5.01 | 4.90 | 4.91 |
| TC1101760 | Q6UXQ5_HUM# ---         |        | MRSS6228. [Source:Uniprot/SPTREMBL       | 1.79E-09 | 4 | 5.74 | 4.28 | 4.14 | 4.29 | 4.37 | 4.45 | 4.54 | 4.64 |
| TC0300888 | Q6UXS4_HUM# ---         |        | AVPC1948. [Source:Uniprot/SPTREMBL       | 5.93E-06 | 4 | 3.99 | 3.70 | 3.34 | 3.37 | 3.37 | 3.31 | 3.41 | 3.50 |
| TC1701735 | Q6YL35_HUM# ---         |        | ---                                      | 5.64E-06 | 4 | 5.63 | 5.14 | 4.95 | 4.98 | 4.98 | 5.35 | 5.41 | 5.28 |
| TC0600646 | Q6ZMM1_HUM# ---         |        | CDNA FLJ16829 fis, clone UTERU30205#     | 9.22E-10 | 4 | 4.22 | 3.45 | 3.55 | 3.66 | 3.55 | 3.83 | 3.87 | 3.81 |
| TC1901759 | Q6ZN19_HUM# ---         |        | CDNA FLJ16515 fis, clone MESAN20155      | 3.42E-11 | 4 | 5.09 | 4.49 | 4.49 | 4.52 | 4.45 | 4.64 | 4.74 | 4.73 |
| TC1900292 | Q6ZN60_HUM# ---         |        | CDNA FLJ16405 fis, clone UTERU20112#     | 0.00086  | 4 | 4.74 | 4.44 | 4.32 | 4.24 | 4.32 | 4.38 | 4.43 | 4.45 |
| TC1600886 | Q6ZNL0_HUM# ---         |        | ---                                      | 0.000437 | 4 | 5.48 | 5.33 | 5.28 | 5.23 | 5.31 | 5.34 | 5.29 | 5.32 |
| TC1700857 | Q6ZNS0_HUM# ---         |        | CDNA FLJ27256 fis, clone SYN09689. [S#   | 0.000128 | 4 | 7.21 | 6.76 | 6.10 | 6.21 | 6.16 | 6.26 | 6.29 | 6.02 |
| TC0800089 | Q6ZP57_HUM# ---         |        | CDNA FLJ26472 fis, clone KDN04506. [S    | 5.87E-11 | 4 | 4.96 | 4.43 | 4.37 | 4.41 | 4.39 | 4.49 | 4.59 | 4.54 |
| TC0500644 | Q6ZP60_HUM# ---         |        | CDNA FLJ26465 fis, clone KDN04238. [S    | 0.000151 | 4 | 4.72 | 4.40 | 4.15 | 4.10 | 4.10 | 4.23 | 4.73 | 4.31 |
| TC1700858 | Q6ZPC0_HUM# ---         |        | CDNA FLJ26091 fis, clone RCT06468. (F#   | 0.000539 | 4 | 6.22 | 5.05 | 4.88 | 4.98 | 5.24 | 4.94 | 5.14 | 4.71 |
| TC1900970 | Q6ZQS4_HUM# ---         |        | CDNA FLJ45445 fis, clone BRSSN20136#     | 7.84E-05 | 4 | 6.53 | 6.08 | 6.03 | 5.95 | 5.99 | 5.93 | 6.01 | 5.90 |
| TC1900536 | Q6ZQS5_HUM# ---         |        | CDNA FLJ45443 fis, clone BRSSN20121#     | 6.93E-07 | 4 | 5.04 | 4.19 | 4.26 | 4.35 | 4.22 | 4.30 | 4.69 | 4.35 |
| TC1401114 | Q6ZR94_HUM# ---         |        | CDNA FLJ46540 fis, clone THYMU3037#      | 0.000184 | 4 | 3.72 | 3.38 | 3.44 | 3.35 | 3.30 | 3.32 | 3.30 | 3.43 |
| TC0300923 | Q6ZRC0_HUM# ---         |        | CDNA FLJ46488 fis, clone THYMU3026#      | 1.41E-06 | 4 | 4.54 | 4.08 | 3.97 | 3.95 | 3.97 | 4.04 | 4.04 | 4.03 |
| TC0600377 | Q6ZRD8_HUM# ---         |        | CDNA FLJ46432 fis, clone THYMU30147      | 5.05E-18 | 4 | 4.23 | 3.25 | 3.33 | 3.34 | 3.27 | 3.31 | 3.27 | 3.27 |
| TC1900442 | Q6ZRN6_HUM# ---         |        | CDNA FLJ46220 fis, clone TESTI401377#    | 0.000393 | 4 | 4.26 | 4.04 | 4.01 | 3.94 | 3.96 | 3.98 | 3.97 | 4.01 |
| TC1100971 | Q6ZRR8_HUM# ---         |        | CDNA FLJ46155 fis, clone TESTI400151#    | 0.000238 | 4 | 4.38 | 3.99 | 4.01 | 3.85 | 3.89 | 3.83 | 3.85 | 3.92 |
| TC0300996 | Q6ZS22_HUM# ---         |        | CDNA FLJ45887 fis, clone OCBBF30215#     | 6.80E-09 | 4 | 6.46 | 5.74 | 5.73 | 5.78 | 5.77 | 5.78 | 5.69 | 5.60 |
| TC1000239 | Q6ZS34_HUM# ---         |        | CDNA FLJ45867 fis, clone OCBBF30037#     | 2.33E-08 | 4 | 4.66 | 3.31 | 3.47 | 3.51 | 3.63 | 3.82 | 3.96 | 3.96 |
| TC0201599 | Q6ZS71_HUM# ---         |        | CDNA FLJ45779 fis, clone NETRP20052#     | 0.000112 | 4 | 6.32 | 4.98 | 4.79 | 4.67 | 4.83 | 5.18 | 5.01 | 5.13 |
| TC0200287 | Q6ZSS0_HUM# ---         |        | CDNA FLJ45251 fis, clone BRHIP20091#     | 3.53E-08 | 4 | 4.74 | 3.32 | 3.01 | 3.52 | 3.43 | 3.43 | 3.58 | 3.70 |
| TC1600184 | Q6ZT39_HUM# ---         |        | CDNA FLJ44991 fis, clone BRAWH3008#      | 4.00E-05 | 4 | 5.35 | 4.83 | 4.85 | 4.79 | 4.85 | 4.85 | 4.75 | 4.89 |

|           |                |                                                            |          |   |       |       |       |       |       |       |      |       |
|-----------|----------------|------------------------------------------------------------|----------|---|-------|-------|-------|-------|-------|-------|------|-------|
| TC2200374 | Q6ZTH8_HUM/--- | CDNA FLJ44641 fis, clone BRACE203005                       | 3.60E-05 | 4 | 5.49  | 4.85  | 5.08  | 4.99  | 4.94  | 4.96  | 5.08 | 5.17  |
| TC1900092 | Q6ZTI5_HUMA--- | CDNA FLJ44616 fis, clone BRACE201295                       | 1.86E-08 | 4 | 4.44  | 3.60  | 3.28  | 3.38  | 3.34  | 3.71  | 3.67 | 3.50  |
| TC1600856 | Q6ZTK2_HUM/--- | CDNA FLJ44575 fis, clone UTERU301811                       | 9.63E-16 | 4 | 5.49  | 4.94  | 4.90  | 4.94  | 4.96  | 4.97  | 4.92 | 4.95  |
| TC1701546 | Q6ZTQ9_HUM/--- | CDNA FLJ44342 fis, clone TRACH300529                       | 1.47E-20 | 4 | 6.49  | 4.27  | 4.55  | 4.75  | 4.77  | 4.91  | 5.26 | 4.96  |
| TC0101478 | Q6ZU99_HUM/--- | CDNA FLJ43880 fis, clone TESTI4009022                      | 1.23E-10 | 4 | 4.78  | 3.82  | 3.70  | 3.75  | 3.88  | 4.08  | 3.94 | 4.18  |
| TC0801181 | Q6ZUG1_HUM---  | CDNA FLJ43745 fis, clone TESTI2019648                      | 3.31E-07 | 4 | 4.12  | 3.82  | 3.83  | 3.77  | 3.81  | 3.80  | 3.67 | 3.79  |
| TC0501495 | Q6ZUG4_HUM---  | CDNA FLJ43741 fis, clone TESTI2017727                      | 8.63E-08 | 4 | 4.67  | 4.25  | 4.20  | 4.24  | 4.24  | 4.34  | 4.25 | 4.31  |
| TC0501485 | Q6ZUH0_HUM---  | CDNA FLJ43720 fis, clone TESOP200606                       | 0.000514 | 4 | 4.16  | 3.79  | 3.67  | 3.74  | 3.60  | 3.82  | 3.73 | 3.90  |
| TC1600727 | Q6ZUK6_HUM/--- | CDNA FLJ43617 fis, clone SPLEN201686                       | 0.000229 | 4 | 6.82  | 6.54  | 6.59  | 6.48  | 6.53  | 6.43  | 6.56 | 6.57  |
| TC1600636 | Q6ZUP2_HUM/--- | CDNA FLJ43495 fis, clone PEBLM200031                       | 4.82E-07 | 4 | 7.84  | 6.89  | 6.75  | 6.87  | 6.90  | 7.08  | 6.98 | 7.14  |
| TC1201686 | Q6ZUW1_HUM---  | CDNA FLJ43282 fis, clone LIVER2007411                      | 3.83E-05 | 4 | 7.73  | 6.98  | 7.12  | 7.25  | 7.15  | 7.08  | 7.13 | 6.84  |
| TC1600786 | Q6ZV49_HUM/--- | CDNA FLJ42988 fis, clone BRTHA200891                       | 4.05E-12 | 4 | 6.76  | 5.76  | 5.80  | 5.76  | 5.65  | 5.71  | 5.78 | 5.65  |
| TC0202290 | Q6ZV57_HUM/--- | CDNA FLJ42970 fis, clone BRSTN201711                       | 0.000302 | 4 | 3.72  | 3.36  | 3.33  | 3.28  | 3.32  | 3.39  | 3.33 | 3.38  |
| TC0201758 | Q6ZVB7_HUM/--- | CDNA FLJ42791 fis, clone BRAWH300755                       | 8.90E-05 | 4 | 5.65  | 5.02  | 5.02  | 4.96  | 4.82  | 4.76  | 4.91 | 5.01  |
| TC0202149 | Q6ZVF4_HUM/--- | CDNA FLJ42639 fis, clone BRACE302466                       | 0.000037 | 4 | 2.72  | 2.18  | 2.16  | 2.24  | 2.26  | 2.23  | 2.41 | 2.65  |
| TC0201286 | Q6ZVL4_HUM/--- | CDNA FLJ42418 fis, clone BLADE200198                       | 9.47E-05 | 4 | 3.31  | 3.09  | 3.10  | 3.01  | 3.02  | 3.06  | 3.11 | 3.04  |
| TC0200221 | Q6ZVP5_HUM/--- | CDNA FLJ42255 fis, clone TKIDN200988                       | 1.52E-07 | 4 | 4.77  | 3.87  | 4.02  | 3.97  | 3.84  | 3.98  | 4.00 | 4.06  |
| TC1101626 | Q6ZVU0_HUM---  | CDNA FLJ42102 fis, clone TESOP200674                       | 3.26E-05 | 4 | 3.87  | 3.60  | 3.55  | 3.44  | 3.58  | 3.57  | 3.54 | 3.49  |
| TC1701403 | Q6ZW54_HUM---  | CDNA FLJ45519 fis, clone BRTHA202411                       | 1.17E-13 | 4 | 4.94  | 4.55  | 4.53  | 4.50  | 4.50  | 4.54  | 4.51 | 4.61  |
| TC0700901 | Q86U85_HUM/--- | Phosphoserine phosphatase-like. [Source:UniProt/SwissProt] | 3.65E-11 | 4 | 6.62  | 5.20  | 5.04  | 5.11  | 5.28  | 5.27  | 5.28 | 5.23  |
| TC0701514 | Q86UW5_HUM---  | ---                                                        | 1.81E-06 | 4 | 6.47  | 5.62  | 5.52  | 5.47  | 5.51  | 5.70  | 5.66 | 5.68  |
| TC0701513 | Q8IV37_HUMA--- | ---                                                        | 5.12E-06 | 4 | 4.28  | 3.85  | 3.74  | 3.80  | 3.78  | 3.78  | 3.86 | 3.88  |
| TC1701622 | Q8N0T0_HUM/--- | ---                                                        | 1.10E-15 | 4 | 6.06  | 5.33  | 5.25  | 5.25  | 5.31  | 5.32  | 5.37 | 5.31  |
| TC1401060 | Q8N1R0_HUM---  | CDNA FLJ37957 fis, clone CTONG200955                       | 6.58E-23 | 4 | 6.61  | 4.06  | 3.84  | 4.16  | 4.28  | 4.74  | 4.82 | 5.19  |
| TC1501220 | Q8N2D2_HUM---  | CDNA FLJ33447 fis, clone BRAMY100000                       | 0.000178 | 4 | 5.91  | 5.56  | 5.56  | 5.45  | 5.60  | 5.64  | 5.50 | 5.52  |
| TC0901097 | Q8N646_HUM/--- | ---                                                        | 1.15E-06 | 4 | 4.31  | 3.90  | 3.88  | 3.85  | 3.83  | 3.92  | 3.87 | 3.82  |
| TC0900211 | Q8N7U8_HUM---  | COBW domain containing 3. [Source:UniProt/SwissProt]       | 2.21E-14 | 4 | 4.37  | 3.55  | 3.55  | 3.54  | 3.59  | 3.73  | 3.88 | 3.76  |
| TC1701699 | Q8N811_HUM/--- | CDNA FLJ40144 fis, clone TESTI2013012                      | 8.04E-06 | 4 | 4.21  | 3.61  | 3.64  | 3.60  | 3.53  | 3.62  | 3.62 | 3.78  |
| TC0701107 | Q8N867_HUM/--- | CDNA FLJ39921 fis, clone SPLEN202041                       | 3.59E-13 | 4 | 6.14  | 5.46  | 5.47  | 5.45  | 5.39  | 5.47  | 5.54 | 5.45  |
| TC1600696 | Q8N8B4_HUM---  | CDNA FLJ39725 fis, clone SMINT201525                       | 8.35E-07 | 4 | 4.73  | 4.40  | 4.37  | 4.37  | 4.47  | 4.43  | 4.55 | 4.44  |
| TC0701183 | Q8N8T1_HUM/--- | CDNA FLJ38910 fis, clone NT2NE200681                       | 0.000118 | 4 | 5.49  | 4.09  | 4.47  | 4.39  | 4.63  | 4.51  | 4.71 | 4.78  |
| TC0800091 | Q8NAJ9_HUM/--- | CDNA FLJ35225 fis, clone PROST200111                       | 0.000102 | 4 | 3.64  | 3.09  | 3.03  | 3.03  | 2.96  | 2.96  | 3.21 | 2.98  |
| TC1500951 | Q8NE92_HUM/--- | ---                                                        | 0.000254 | 4 | 10.27 | 10.02 | 10.06 | 10.00 | 10.08 | 10.08 | 9.99 | 10.07 |
| TC0401444 | Q8NEQ2_HUM---  | MGC24125 protein. [Source:UniProt/SwissProt]               | 2.41E-06 | 4 | 5.12  | 4.51  | 4.52  | 4.72  | 4.74  | 4.70  | 4.65 | 4.54  |

|           |              |        |                                          |          |   |      |      |      |      |      |      |      |      |
|-----------|--------------|--------|------------------------------------------|----------|---|------|------|------|------|------|------|------|------|
| TC0600191 | Q8NHA6_HUM   | ---    | Seven transmembrane helix receptor. [    | 5.10E-05 | 4 | 7.84 | 7.45 | 7.49 | 7.38 | 7.49 | 7.54 | 7.35 | 7.47 |
| TC0102898 | Q8NHC2_HUM   | ---    | Seven transmembrane helix receptor. [    | 2.87E-19 | 4 | 6.34 | 4.34 | 4.08 | 4.54 | 4.52 | 5.03 | 5.06 | 5.45 |
| TC1201331 | Q8WYW9_HUM   | ---    | ---                                      | 1.35E-06 | 4 | 4.84 | 3.86 | 3.60 | 3.89 | 3.83 | 3.91 | 3.93 | 4.06 |
| TC1600933 | Q92617-5 /// | C      | K0220_HUMAN Isoform 5 of Q92617 -        | 9.30E-13 | 4 | 6.58 | 5.66 | 5.49 | 5.46 | 5.55 | 5.55 | 5.72 | 5.57 |
| TC1100065 | Q96FU4_HUM   | ---    | ---                                      | 7.41E-05 | 4 | 6.55 | 6.71 | 5.77 | 6.05 | 5.89 | 6.31 | 6.29 | 6.59 |
| TC0700978 | Q96JH1_HUM   | ---    | CDNA FLJ14435 fis, clone HEMBA1007C      | 0.000428 | 4 | 6.06 | 5.83 | 5.74 | 5.83 | 5.86 | 5.84 | 5.81 | 5.86 |
| TC0600461 | Q96MJ2_HUM   | ---    | CDNA FLJ32293 fis, clone PROST200175     | 9.03E-10 | 4 | 5.40 | 4.74 | 4.66 | 4.73 | 4.70 | 4.91 | 4.87 | 4.87 |
| TC0400876 | Q96PS2_HUM   | ---    | FGF-2 activity-associated protein 3. [So | 2.85E-06 | 4 | 9.54 | 8.66 | 9.18 | 9.31 | 9.23 | 9.18 | 9.22 | 9.11 |
| TC1601287 | Q96PS3_HUM   | ---    | FGF-2 activity-associated protein 2. [So | 3.23E-09 | 4 | 5.74 | 4.65 | 4.48 | 4.55 | 4.48 | 4.49 | 4.41 | 4.74 |
| TC1900895 | Q9BZ77_HUM   | ---    | ---                                      | 2.36E-05 | 4 | 4.43 | 3.71 | 3.71 | 3.61 | 3.71 | 3.69 | 3.45 | 3.80 |
| TC0500177 | Q9H385_HUM   | ---    | ---                                      | 6.62E-08 | 4 | 4.25 | 3.00 | 2.96 | 3.04 | 3.23 | 3.14 | 3.17 | 3.19 |
| TC1701124 | Q9H3A7_HUM   | ---    | ---                                      | 0.000273 | 4 | 4.06 | 3.41 | 3.29 | 3.51 | 3.32 | 3.33 | 3.36 | 3.75 |
| TC1700761 | Q9H614_HUM   | ---    | Myosin-XVB (Unconventional myosin-1      | 9.93E-08 | 4 | 5.20 | 5.03 | 5.01 | 4.97 | 4.98 | 4.97 | 4.94 | 4.99 |
| TC0100922 | Q9H762_HUM   | ---    | CDNA: FLJ21272 fis, clone COL01753. [S   | 9.78E-06 | 4 | 5.05 | 4.34 | 4.37 | 4.31 | 4.28 | 4.47 | 4.66 | 4.62 |
| TC2000382 | Q9H800_HUM   | ---    | CDNA FLJ14031 fis, clone HEMBA10043      | 6.46E-05 | 4 | 6.84 | 6.16 | 6.14 | 6.18 | 6.11 | 6.18 | 6.26 | 6.22 |
| TC1600902 | Q9NRE7_HUM   | ---    | KIAA0220-like protein (LOC339047 prot    | 6.34E-06 | 4 | 6.19 | 5.87 | 5.85 | 5.69 | 5.83 | 5.78 | 5.86 | 5.74 |
| TC1701447 | Q9NWC8_HUM   | ---    | leucine rich repeat containing 37, mem   | 1.83E-10 | 4 | 6.75 | 5.11 | 5.01 | 5.34 | 5.64 | 5.66 | 5.94 | 5.79 |
| TC1000246 | Q9P136_HUM   | ---    | ---                                      | 5.94E-07 | 4 | 5.86 | 5.91 | 5.24 | 5.29 | 5.28 | 5.50 | 5.62 | 5.69 |
| TC1200502 | Q9P175_HUM   | ---    | ---                                      | 6.67E-09 | 4 | 5.20 | 4.05 | 4.09 | 4.24 | 4.22 | 4.21 | 4.21 | 4.35 |
| TC1000247 | Q9P194_HUM   | ---    | ---                                      | 0.000754 | 4 | 4.23 | 3.76 | 3.51 | 3.60 | 3.54 | 3.51 | 3.69 | 3.81 |
| TC1100101 | Q9P1B9_HUM   | ---    | ---                                      | 0.000114 | 4 | 9.10 | 6.40 | 5.88 | 7.30 | 7.72 | 7.86 | 7.37 | 7.77 |
| TC1200864 | Q9P1F0_HUM   | ---    | ---                                      | 9.36E-08 | 4 | 6.51 | 5.09 | 5.16 | 5.29 | 5.14 | 5.30 | 5.41 | 5.56 |
| TC1100060 | Q9P1L5_HUM   | ---    | ---                                      | 2.36E-05 | 4 | 5.96 | 4.77 | 4.83 | 5.03 | 5.02 | 4.97 | 5.31 | 5.08 |
| TC0X00795 | Q9P1M3_HUM   | ---    | ---                                      | 0.000508 | 4 | 6.93 | 5.87 | 5.53 | 5.75 | 5.52 | 5.94 | 5.79 | 5.87 |
| TC1201577 | Q9UFT6_HUM   | 196515 | GR AF-1 specific protein phosphatase (I  | 6.01E-06 | 4 | 5.06 | 4.68 | 4.56 | 4.68 | 4.69 | 4.68 | 4.78 | 4.71 |
| TC1600836 | Q9UI82_HUM   | ---    | ---                                      | 0.000185 | 4 | 8.05 | 7.14 | 7.07 | 7.06 | 6.90 | 7.38 | 7.01 | 7.14 |
| TC0301198 | QRICH1       | 54870  | glutamine-rich 1                         | 0.000838 | 4 | 5.90 | 5.60 | 5.43 | 5.47 | 5.48 | 5.59 | 5.60 | 5.63 |
| TC1201319 | R3HDM2       | 22864  | R3H domain containing 2                  | 8.90E-05 | 4 | 7.03 | 6.66 | 6.56 | 6.61 | 6.52 | 6.63 | 6.79 | 6.76 |
| TC0900543 | RABGAP1      | 23637  | RAB GTPase activating protein 1 ///      | 1.34E-07 | 4 | 5.84 | 5.51 | 5.38 | 5.51 | 5.51 | 5.63 | 5.73 | 5.66 |
| TC0700054 | RAC1         | 5879   | ras-related C3 botulinum toxin substrat  | 8.18E-09 | 4 | 7.95 | 7.48 | 7.60 | 7.74 | 7.71 | 7.78 | 7.72 | 7.79 |
| TC0301021 | RAF1         | 5894   | v-raf-1 murine leukemia viral oncogene   | 1.20E-14 | 4 | 8.73 | 7.46 | 7.46 | 7.76 | 7.77 | 7.94 | 7.86 | 8.03 |
| TC1401136 | RAGE         | 5891   | renal tumor antigen ///                  | 1.68E-10 | 4 | 3.57 | 3.28 | 3.28 | 3.25 | 3.25 | 3.27 | 3.30 | 3.35 |
| TC1800046 | RALBP1       | 10928  | ralA binding protein 1                   | 5.05E-08 | 4 | 8.16 | 7.64 | 7.44 | 7.65 | 7.63 | 7.79 | 7.91 | 7.91 |
| TC0900572 | RALGPS1      | 9649   | Ral GEF with PH domain and SH3 bindir    | 3.09E-07 | 4 | 3.78 | 3.50 | 3.57 | 3.54 | 3.56 | 3.54 | 3.51 | 3.50 |

|           |                                                                  |           |                                          |          |   |      |      |      |      |      |      |      |      |
|-----------|------------------------------------------------------------------|-----------|------------------------------------------|----------|---|------|------|------|------|------|------|------|------|
| TC0700227 | RAMP3                                                            | 10268     | receptor (G protein-coupled) activity m  | 0.000444 | 4 | 5.05 | 4.67 | 4.89 | 4.62 | 4.77 | 4.81 | 4.74 | 4.74 |
| TC1901080 | RANBP3                                                           | 8498      | RAN binding protein 3 /// Ran-binding    | 6.53E-05 | 4 | 5.62 | 5.31 | 5.27 | 5.45 | 5.43 | 5.41 | 5.44 | 5.52 |
| TC0901396 | RAPGEF1                                                          | 2889      | Rap guanine nucleotide exchange factc    | 5.21E-07 | 4 | 5.95 | 5.59 | 5.31 | 5.38 | 5.34 | 5.33 | 5.35 | 5.37 |
| TC0400644 | RAPGEF2                                                          | 9693      | Rap guanine nucleotide exchange factc    | 4.68E-10 | 4 | 7.36 | 6.64 | 6.26 | 6.39 | 6.27 | 6.68 | 6.70 | 6.81 |
| TC1700430 | RAPGEFL1                                                         | 51195     | Rap guanine nucleotide exchange factc    | 1.49E-08 | 4 | 3.81 | 3.51 | 3.45 | 3.45 | 3.47 | 3.44 | 3.39 | 3.46 |
| TC1300672 | RASA3                                                            | 22821     | RAS p21 protein activator 3              | 1.44E-06 | 4 | 5.29 | 4.75 | 4.58 | 4.93 | 4.93 | 4.97 | 5.01 | 5.02 |
| TC0301231 | RASSF1                                                           | 11186     | Ras association (RalGDS/AF-6) domain f   | 4.48E-09 | 4 | 4.93 | 4.48 | 4.50 | 4.61 | 4.61 | 4.65 | 4.54 | 4.59 |
| TC0700987 | RBAK /// RNF2: 57786 /// RB-associated KRAB zinc finger /// ring |           |                                          | 0.000286 | 4 | 5.99 | 5.55 | 5.74 | 5.82 | 5.64 | 5.72 | 5.86 | 5.84 |
| TC1100581 | RBM14 /// RBN 10432 /// RNA binding motif protein 14 /// RNA b   |           |                                          | 0.000681 | 4 | 5.59 | 5.35 | 5.29 | 5.40 | 5.35 | 5.39 | 5.48 | 5.53 |
| TC0100821 | RBM15                                                            | 64783     | RNA binding motif protein 15 /// Putat   | 1.78E-05 | 4 | 5.17 | 5.31 | 5.02 | 4.96 | 4.98 | 5.18 | 5.18 | 5.15 |
| TC1400348 | RBM25                                                            | 58517     | RNA binding motif protein 25             | 4.49E-13 | 4 | 7.51 | 6.43 | 6.36 | 6.31 | 6.39 | 6.46 | 6.71 | 6.57 |
| TC0700918 | RBM33                                                            | 732019 // | RNA binding motif protein 33 /// Prolin  | 9.67E-12 | 4 | 7.18 | 6.71 | 6.58 | 6.70 | 6.67 | 6.80 | 6.81 | 6.86 |
| TC2000706 | RBM39                                                            | 9584      | RNA binding motif protein 39 /// RNA-b   | 1.71E-07 | 4 | 9.40 | 8.85 | 8.91 | 8.88 | 8.79 | 8.87 | 8.90 | 8.87 |
| TC0201219 | RBM44 /// LRR 375316 //                                          |           | RNA binding motif protein 44 /// leucin  | 2.08E-08 | 4 | 6.41 | 5.97 | 6.03 | 6.13 | 6.01 | 6.14 | 6.26 | 6.21 |
| TC0300278 | RBM5                                                             | 10181     | RNA binding motif protein 5              | 2.26E-12 | 4 | 8.70 | 7.91 | 7.71 | 7.75 | 7.62 | 7.85 | 7.91 | 7.91 |
| TC0300276 | RBM6                                                             | 10180     | RNA binding motif protein 6              | 1.55E-05 | 4 | 7.10 | 6.28 | 6.28 | 6.28 | 6.29 | 6.12 | 6.41 | 6.23 |
| TC0103014 | RC3H1                                                            | 149041    | ring finger and CCCH-type zinc finger do | 1.49E-05 | 4 | 8.81 | 8.26 | 8.23 | 8.44 | 8.23 | 8.33 | 8.38 | 8.41 |
| TC1900720 | RCN3                                                             | 57333     | reticulocalbin 3, EF-hand calcium bindin | 7.75E-21 | 4 | 5.76 | 5.06 | 5.02 | 5.00 | 4.92 | 4.97 | 4.96 | 5.04 |
| TC0101492 | RCOR3                                                            | 55758     | REST corepressor 3 /// REST corepressc   | 2.32E-09 | 4 | 6.61 | 6.34 | 6.21 | 6.23 | 6.22 | 6.39 | 6.51 | 6.50 |
| TC0101262 | RCSL1                                                            | 92241     | RCSL domain containing 1 /// RCSL do     | 1.00E-09 | 4 | 6.94 | 6.17 | 6.25 | 6.40 | 6.42 | 6.50 | 6.58 | 6.63 |
| TC1400122 | REC8                                                             | 9985      | REC8 homolog (yeast)                     | 1.58E-19 | 4 | 5.73 | 4.98 | 4.77 | 4.82 | 4.88 | 4.94 | 5.00 | 5.06 |
| TC1701695 | RECQL5                                                           | 9400      | RecQ protein-like 5                      | 0.000182 | 4 | 4.48 | 4.25 | 4.26 | 4.32 | 4.27 | 4.26 | 4.21 | 4.23 |
| TC0400874 | RELL1                                                            | 768211    | RELT-like 1                              | 6.74E-06 | 4 | 8.24 | 7.38 | 7.16 | 7.49 | 7.50 | 7.58 | 7.64 | 7.91 |
| TC1400092 | REM2                                                             | 161253    | RAS (RAD and GEM)-like GTP binding 2     | 4.70E-22 | 4 | 6.49 | 4.87 | 4.68 | 4.93 | 5.00 | 5.15 | 5.28 | 5.09 |
| TC0101828 | RERE                                                             | 473       | arginine-glutamic acid dipeptide (RE) re | 2.84E-08 | 4 | 6.11 | 5.81 | 5.70 | 5.83 | 5.75 | 5.93 | 5.95 | 5.98 |
| TC0201780 | REV1                                                             | 51455     | REV1 homolog (S. cerevisiae)             | 4.88E-08 | 4 | 4.81 | 4.11 | 4.23 | 4.29 | 4.42 | 4.39 | 4.45 | 4.34 |
| TC1701230 | RFFL                                                             | 117584    | ring finger and FYVE-like domain contai  | 0.000639 | 4 | 6.90 | 6.44 | 6.30 | 6.56 | 6.58 | 6.56 | 6.49 | 6.58 |
| TC0103025 | RFWD2                                                            | 731621 // | ring finger and WD repeat domain 2 ///   | 4.78E-05 | 4 | 8.71 | 8.31 | 8.36 | 8.31 | 8.23 | 8.44 | 8.35 | 8.44 |
| TC0X01018 | RGAG4                                                            | 340526    | retrotransposon gag domain containin     | 1.01E-08 | 4 | 6.08 | 5.14 | 5.32 | 5.26 | 5.32 | 5.29 | 5.18 | 5.42 |
| TC0601176 | RGL2                                                             | 5863      | ral guanine nucleotide dissociation stir | 1.33E-23 | 4 | 6.07 | 5.34 | 5.28 | 5.25 | 5.31 | 5.38 | 5.30 | 5.35 |
| TC0200427 | RGPD1                                                            | 400966    | RANBP2-like and GRIP domain containi     | 3.60E-05 | 4 | 4.67 | 4.22 | 3.94 | 3.91 | 3.97 | 4.16 | 4.31 | 4.12 |
| TC0201698 | RGPD2                                                            | 729857    | RANBP2-like and GRIP domain containi     | 0.000653 | 4 | 4.91 | 4.29 | 4.03 | 3.90 | 4.00 | 4.28 | 4.41 | 4.26 |
| TC0201819 | RGPD5                                                            | 84220     | RANBP2-like and GRIP domain containi     | 4.03E-05 | 4 | 5.30 | 5.27 | 5.07 | 5.03 | 5.09 | 5.12 | 5.22 | 5.17 |
| TC1201642 | RHOF                                                             | 54509     | ras homolog gene family, member F (in    | 7.77E-05 | 4 | 5.33 | 5.01 | 5.01 | 5.11 | 5.13 | 5.12 | 5.16 | 5.06 |

|           |                |        |                                             |          |   |      |      |      |      |      |      |      |      |
|-----------|----------------|--------|---------------------------------------------|----------|---|------|------|------|------|------|------|------|------|
| TC1600026 | RHOT2          | 89941  | ras homolog gene family, member T2          | 3.12E-06 | 4 | 5.39 | 5.13 | 5.12 | 5.12 | 5.14 | 5.14 | 5.11 | 5.10 |
| TC0500933 | RICTOR /// NP_ | 253260 | rapamycin-insensitive companion of m        | 6.51E-23 | 4 | 8.58 | 7.24 | 6.89 | 7.10 | 7.03 | 7.61 | 7.67 | 7.91 |
| TC1400037 | RNASE6         | 6039   | ribonuclease, RNase A family, k6            | 2.68E-08 | 4 | 7.78 | 6.79 | 5.53 | 5.87 | 5.69 | 6.00 | 6.24 | 6.72 |
| TC0601755 | RNASET2        | 8635   | ribonuclease T2 /// Ribonuclease T2 pr      | 4.82E-16 | 4 | 7.98 | 6.71 | 6.85 | 7.08 | 6.90 | 7.17 | 7.25 | 7.25 |
| TC1601335 | RNF166         | 115992 | ring finger protein 166                     | 2.83E-07 | 4 | 6.57 | 6.01 | 6.02 | 6.14 | 6.21 | 6.22 | 6.21 | 6.28 |
| TC1100666 | RNF169         | 254225 | ring finger protein 169                     | 1.02E-05 | 4 | 7.53 | 7.00 | 7.02 | 7.18 | 7.06 | 7.23 | 7.23 | 7.32 |
| TC2200204 | RNF185         | 91445  | ring finger protein 185 /// RING finger p   | 2.59E-05 | 4 | 5.57 | 5.29 | 5.18 | 5.20 | 5.27 | 5.41 | 5.34 | 5.44 |
| TC0102090 | RNF19B         | 127544 | ring finger protein 19B /// IBR domain-     | 8.11E-08 | 4 | 8.79 | 8.23 | 8.09 | 8.23 | 8.21 | 8.52 | 8.43 | 8.70 |
| TC1700827 | RNF213         | 57674  | ring finger protein 213                     | 4.57E-06 | 4 | 7.73 | 6.66 | 6.47 | 6.86 | 6.67 | 6.91 | 7.23 | 7.21 |
| TC1400120 | RNF31 /// IRF9 | 55072  | ring finger protein 31 /// interferon reg   | 2.23E-05 | 4 | 6.53 | 6.17 | 6.03 | 6.11 | 6.01 | 6.25 | 6.27 | 6.41 |
| TC0101778 | RP11-345P4.4   | 728661 | // similar to solute carrier family 35, mem | 7.12E-07 | 4 | 6.67 | 6.33 | 6.25 | 6.36 | 6.38 | 6.39 | 6.49 | 6.45 |
| TC0X00587 | RP13-36C9.1    | 728911 | // cancer/testis antigen CT45 /// cancer/t  | 2.49E-05 | 4 | 3.81 | 3.45 | 3.50 | 3.44 | 3.42 | 3.47 | 3.45 | 3.49 |
| TC0100912 | RP3-365I19.1   | 647135 | SLIT-ROBO Rho GTPase-activating prote       | 2.01E-24 | 4 | 7.05 | 5.70 | 5.30 | 5.65 | 5.84 | 6.08 | 6.38 | 6.37 |
| TC0102041 | RPA2           | 6118   | replication protein A2, 32kDa /// Replic    | 6.57E-13 | 4 | 7.01 | 6.27 | 6.13 | 6.02 | 5.93 | 6.17 | 6.26 | 6.30 |
| TC0X00847 | RPGR           | 6103   | retinitis pigmentosa GTPase regulator /     | 5.13E-10 | 4 | 7.02 | 5.94 | 5.98 | 5.88 | 5.80 | 6.10 | 6.31 | 6.35 |
| TC1400050 | RPGRIP1        | 57096  | retinitis pigmentosa GTPase regulator i     | 3.50E-30 | 4 | 4.25 | 3.04 | 2.82 | 2.92 | 2.84 | 3.07 | 3.16 | 3.35 |
| TC0301550 | RPL32P3        | ---    | ribosomal protein L32 pseudogene 3 (R       | 9.13E-08 | 4 | 6.17 | 5.71 | 5.64 | 5.77 | 5.81 | 5.90 | 6.04 | 5.88 |
| TC1401062 | RPS6KA5        | 9252   | ribosomal protein S6 kinase, 90kDa, po      | 5.82E-21 | 4 | 8.23 | 6.19 | 5.51 | 5.97 | 6.20 | 6.95 | 7.08 | 7.38 |
| TC0601720 | RSPH3          | 83861  | radial spoke 3 homolog (Chlamydomon         | 6.83E-17 | 4 | 4.94 | 4.08 | 4.08 | 4.22 | 4.19 | 4.34 | 4.52 | 4.61 |
| TC1600309 | RUNDC2B /// C  | 400509 | RUN domain containing 2B /// CDNA FI        | 2.20E-06 | 4 | 4.84 | 4.61 | 4.54 | 4.55 | 4.60 | 4.57 | 4.53 | 4.62 |
| TC0601173 | RXRB           | 6257   | retinoid X receptor, beta /// Retinoic ac   | 1.12E-11 | 4 | 6.82 | 5.78 | 5.77 | 5.80 | 5.77 | 5.86 | 5.82 | 5.79 |
| TC1900103 | SAFB           | 6294   | scaffold attachment factor B                | 3.35E-06 | 4 | 7.20 | 6.79 | 6.78 | 6.95 | 6.87 | 6.95 | 7.06 | 7.02 |
| TC1901070 | SAFB2          | 9667   | scaffold attachment factor B2               | 6.35E-13 | 4 | 7.54 | 6.79 | 6.79 | 7.03 | 7.03 | 7.05 | 7.23 | 7.18 |
| TC1900517 | SAMD4B         | 55095  | sterile alpha motif domain containing 4     | 2.57E-06 | 4 | 5.83 | 5.63 | 5.42 | 5.49 | 5.51 | 5.57 | 5.55 | 5.58 |
| TC0201888 | SAP130         | 79595  | Sin3A-associated protein, 130kDa /// H      | 9.42E-08 | 4 | 6.80 | 6.35 | 6.19 | 6.41 | 6.34 | 6.50 | 6.56 | 6.61 |
| TC2200382 | SAPS2          | 9701   | SAPS domain family, member 2 /// SAP        | 2.23E-16 | 4 | 5.42 | 5.08 | 4.97 | 5.03 | 5.04 | 5.02 | 5.01 | 5.02 |
| TC1500586 | SCAND2         | ---    | SCAN domain-containing protein 2. [So       | 3.50E-09 | 4 | 3.95 | 3.44 | 3.55 | 3.58 | 3.50 | 3.55 | 3.67 | 3.59 |
| TC0301166 | SCAP           | 22937  | SREBF chaperone /// Sterol regulatory       | 3.00E-17 | 4 | 6.04 | 5.27 | 5.32 | 5.40 | 5.40 | 5.46 | 5.46 | 5.56 |
| TC0800445 | SDC2           | 6383   | syndecan 2                                  | 7.36E-08 | 4 | 4.11 | 3.52 | 3.19 | 3.29 | 3.29 | 3.32 | 3.47 | 3.88 |
| TC1200722 | SDSL           | 113675 | serine dehydratase-like                     | 4.76E-07 | 4 | 5.19 | 4.97 | 4.97 | 4.91 | 4.92 | 4.94 | 4.85 | 4.95 |
| TC1700794 | SEC14L1        | 6397   | SEC14-like 1 (S. cerevisiae)                | 2.23E-13 | 4 | 8.85 | 7.93 | 7.75 | 7.88 | 7.83 | 8.15 | 8.05 | 8.32 |
| TC1000343 | SEC24C         | 9632   | SEC24 related gene family, member C (       | 1.63E-12 | 4 | 5.41 | 4.81 | 4.75 | 4.73 | 4.66 | 4.75 | 4.76 | 4.76 |
| TC1000058 | SEC61A2        | 55176  | Sec61 alpha 2 subunit (S. cerevisiae) //    | 1.15E-22 | 4 | 5.68 | 4.30 | 4.09 | 4.25 | 4.25 | 4.38 | 4.50 | 4.41 |
| TC0900367 | SECISBP2       | 79048  | SECIS binding protein 2 /// SECIS-bindir    | 6.86E-23 | 4 | 6.60 | 5.49 | 5.36 | 5.55 | 5.49 | 5.78 | 5.94 | 6.01 |

|           |                           |        |                                               |          |   |      |      |      |      |      |      |      |      |
|-----------|---------------------------|--------|-----------------------------------------------|----------|---|------|------|------|------|------|------|------|------|
| TC0701378 | SEMA3C                    | 10512  | sema domain, immunoglobulin domain            | 9.38E-08 | 4 | 3.46 | 3.21 | 3.03 | 3.04 | 2.98 | 3.12 | 3.15 | 3.29 |
| TC0901113 | SEMA4D                    | 10507  | sema domain, immunoglobulin domain            | 4.84E-08 | 4 | 8.99 | 8.42 | 8.09 | 8.35 | 8.28 | 8.52 | 8.51 | 8.69 |
| TC1500899 | SERINC4                   | 619189 | serine incorporator 4 /// serine incorpc      | 5.17E-09 | 4 | 4.86 | 4.49 | 4.48 | 4.42 | 4.53 | 4.61 | 4.57 | 4.58 |
| TC0501100 | SERINC5                   | 256987 | serine incorporator 5                         | 3.30E-08 | 4 | 5.46 | 4.96 | 4.87 | 4.96 | 4.84 | 5.05 | 5.13 | 5.07 |
| TC1200770 | SETD1B                    | 23067  | SET domain containing 1B                      | 2.62E-10 | 4 | 6.68 | 5.91 | 5.74 | 6.04 | 5.98 | 6.10 | 6.20 | 6.20 |
| TC0301163 | SETD2                     | 29072  | SET domain containing 2                       | 2.23E-08 | 4 | 7.97 | 7.38 | 7.26 | 7.36 | 7.35 | 7.46 | 7.64 | 7.60 |
| TC2100328 | SETD4                     | 54093  | SET domain containing 4 /// SET domai         | 0.000197 | 4 | 4.11 | 3.95 | 3.96 | 3.97 | 3.91 | 3.93 | 4.00 | 4.00 |
| TC0901400 | SETX                      | 23064  | senataxin /// Probable helicase senata        | 2.26E-16 | 4 | 8.48 | 7.69 | 7.17 | 7.52 | 7.44 | 7.78 | 7.92 | 8.07 |
| TC0202200 | SF3B1                     | 23451  | splicing factor 3b, subunit 1, 155kDa         | 5.92E-17 | 4 | 9.32 | 8.42 | 8.20 | 8.31 | 8.29 | 8.38 | 8.45 | 8.38 |
| TC2200212 | SFI1                      | 9814   | Sfi1 homolog, spindle assembly associa        | 5.97E-29 | 4 | 5.36 | 4.69 | 4.66 | 4.68 | 4.68 | 4.72 | 4.73 | 4.76 |
| TC0100299 | SFN                       | 2810   | stratifin                                     | 0.00049  | 4 | 5.42 | 5.22 | 5.07 | 5.19 | 5.21 | 5.26 | 5.30 | 5.25 |
| TC1901313 | SFRS14                    | 10147  | splicing factor, arginine/serine-rich 14 /    | 6.46E-08 | 4 | 4.99 | 4.53 | 4.52 | 4.53 | 4.62 | 4.60 | 4.67 | 4.55 |
| TC1900626 | SFRS16                    | 11129  | splicing factor, arginine/serine-rich 16 /    | 2.95E-15 | 4 | 6.38 | 5.80 | 5.67 | 5.64 | 5.67 | 5.66 | 5.71 | 5.72 |
| TC0X00006 | SFRS17A /// AS 8227 /// 4 |        | splicing factor, arginine/serine-rich 17A     | 0.00066  | 4 | 5.11 | 4.95 | 4.93 | 4.92 | 4.90 | 4.87 | 4.90 | 4.91 |
| TC0601476 | SFRS18                    | 25957  | splicing factor, arginine/serine-rich 18      | 2.08E-16 | 4 | 7.82 | 6.72 | 6.62 | 6.72 | 6.70 | 6.85 | 7.07 | 6.98 |
| TC0100916 | SFRS2IP /// NB            | 9169   | splicing factor, arginine/serine-rich 2, ir   | 4.18E-17 | 4 | 9.91 | 8.13 | 8.25 | 8.39 | 8.32 | 8.35 | 8.36 | 8.23 |
| TC1400326 | SFRS5                     | 6430   | splicing factor, arginine/serine-rich 5 //    | 2.20E-10 | 4 | 9.34 | 8.85 | 8.63 | 8.54 | 8.60 | 8.82 | 8.92 | 8.95 |
| TC1200699 | SH2B3                     | 10019  | SH2B adaptor protein 3                        | 1.09E-11 | 4 | 5.53 | 4.66 | 4.66 | 4.98 | 4.96 | 5.11 | 5.06 | 5.17 |
| TC0400031 | SH3BP2                    | 6452   | SH3-domain binding protein 2                  | 3.31E-07 | 4 | 5.85 | 5.45 | 5.37 | 5.45 | 5.46 | 5.47 | 5.46 | 5.47 |
| TC1100877 | SIDT2                     | 51092  | SID1 transmembrane family, member 2           | 1.99E-05 | 4 | 5.40 | 5.18 | 5.11 | 5.27 | 5.19 | 5.14 | 5.14 | 5.18 |
| TC1900756 | SIGLECP3                  | ---    | SIGLECP3 protein (Fragment). [Source:l        | 1.46E-05 | 4 | 4.60 | 4.12 | 4.16 | 4.13 | 4.09 | 4.11 | 4.13 | 4.20 |
| TC1900289 | SIN3B                     | 23309  | SIN3 homolog B, transcription regulato        | 3.97E-07 | 4 | 4.64 | 4.25 | 4.28 | 4.22 | 4.23 | 4.21 | 4.24 | 4.22 |
| TC1400339 | SIPA1L1                   | 26037  | signal-induced proliferation-associated       | 1.50E-12 | 4 | 7.50 | 7.07 | 6.23 | 6.58 | 6.53 | 6.97 | 7.04 | 7.23 |
| TC2000496 | SIRPB2                    | 284759 | signal-regulatory protein beta 2 /// Sigr     | 1.24E-08 | 4 | 7.30 | 6.34 | 6.37 | 6.38 | 6.12 | 6.26 | 6.38 | 6.47 |
| TC1701474 | SKAP1                     | 8631   | src kinase associated phosphoprotein 1        | 0.000568 | 4 | 4.25 | 3.89 | 3.87 | 3.96 | 3.91 | 3.88 | 4.01 | 4.04 |
| TC1700887 | SKIP                      | 51763  | skeletal muscle and kidney enriched inc       | 0.000935 | 4 | 5.59 | 5.30 | 5.20 | 5.26 | 5.34 | 5.42 | 5.34 | 5.46 |
| TC0600284 | SKIV2L                    | 6499   | superkiller viralicidic activity 2-like (S. c | 9.90E-13 | 4 | 5.20 | 4.77 | 4.69 | 4.71 | 4.68 | 4.71 | 4.69 | 4.69 |
| TC1601187 | SLC12A4 /// LC 6560 /// 3 |        | solute carrier family 12 (potassium/chlk      | 4.84E-13 | 4 | 4.74 | 4.38 | 4.35 | 4.41 | 4.39 | 4.42 | 4.44 | 4.50 |
| TC1500806 | SLC12A6                   | 9990   | solute carrier family 12 (potassium/chlk      | 3.86E-06 | 4 | 9.27 | 8.84 | 8.77 | 8.75 | 8.60 | 8.69 | 8.70 | 8.69 |
| TC1700751 | SLC16A5                   | 9121   | solute carrier family 16, member 5 (mo        | 2.35E-06 | 4 | 5.09 | 4.74 | 4.85 | 4.87 | 4.87 | 4.79 | 4.78 | 4.84 |
| TC0200586 | SLC20A1                   | 6574   | solute carrier family 20 (phosphate trar      | 3.32E-07 | 4 | 6.43 | 6.04 | 5.57 | 5.73 | 5.69 | 5.95 | 6.10 | 6.04 |
| TC0600860 | SLC22A1                   | 6580   | solute carrier family 22 (organic cation      | 2.54E-10 | 4 | 5.54 | 4.61 | 4.54 | 4.80 | 4.92 | 5.00 | 4.97 | 4.88 |
| TC0500463 | SLC22A5                   | 6584   | solute carrier family 22 (organic cation)     | 1.18E-08 | 4 | 4.56 | 4.11 | 4.10 | 4.08 | 4.07 | 4.12 | 4.17 | 4.22 |
| TC2000529 | SLC23A2                   | 9962   | solute carrier family 23 (nucleobase tra      | 1.84E-14 | 4 | 4.90 | 4.39 | 4.18 | 4.28 | 4.22 | 4.35 | 4.38 | 4.46 |

|           |                   |        |                                           |          |   |       |       |       |       |       |       |       |       |
|-----------|-------------------|--------|-------------------------------------------|----------|---|-------|-------|-------|-------|-------|-------|-------|-------|
| TC0X00562 | SLC25A14          | 9016   | solute carrier family 25 (mitochondrial   | 7.27E-09 | 4 | 4.57  | 4.27  | 4.34  | 4.18  | 4.09  | 4.19  | 4.32  | 4.35  |
| TC1101541 | SLC25A45          | 283130 | solute carrier family 25, member 45 ///   | 6.17E-06 | 4 | 4.77  | 4.58  | 4.64  | 4.51  | 4.63  | 4.60  | 4.58  | 4.63  |
| TC0600303 | SLC39A7           | 7922   | solute carrier family 39 (zinc transport  | 0.000238 | 4 | 4.90  | 4.60  | 4.62  | 4.60  | 4.65  | 4.64  | 4.57  | 4.57  |
| TC1700889 | SLC43A2           | 124935 | solute carrier family 43, member 2 ///    | 2.04E-05 | 4 | 7.00  | 6.51  | 6.13  | 6.57  | 6.45  | 6.66  | 6.52  | 6.80  |
| TC1900177 | SLC44A2           | 57153  | solute carrier family 44, member 2 ///    | 9.57E-07 | 4 | 8.18  | 7.19  | 7.06  | 7.26  | 7.25  | 7.28  | 7.24  | 7.43  |
| TC0801287 | SLC45A4 /// Q7    | 57210  | solute carrier family 45, member 4 ///    | 1.38E-09 | 4 | 6.70  | 5.84  | 5.62  | 5.87  | 5.85  | 5.97  | 5.90  | 6.08  |
| TC1200341 | SLC4A8            | 9498   | solute carrier family 4, sodium bicarbon  | 0.00052  | 4 | 3.17  | 2.96  | 3.02  | 2.98  | 2.95  | 3.00  | 3.02  | 3.05  |
| TC0300075 | SLC6A6            | 6533   | solute carrier family 6 (neurotransmitte  | 0.000656 | 4 | 8.78  | 8.48  | 8.27  | 8.45  | 8.31  | 8.28  | 8.26  | 8.30  |
| TC1600538 | SLC7A6            | 9057   | solute carrier family 7 (cationic amino a | 2.50E-16 | 4 | 4.95  | 4.17  | 4.36  | 4.58  | 4.48  | 4.47  | 4.58  | 4.52  |
| TC1400705 | SLC7A7            | 9056   | solute carrier family 7 (cationic amino a | 2.30E-06 | 4 | 5.71  | 4.65  | 4.77  | 4.93  | 4.76  | 4.77  | 5.02  | 5.09  |
| TC0X00881 | SLC9A7            | 84679  | solute carrier family 9 (sodium/hydroge   | 6.10E-11 | 4 | 4.40  | 4.02  | 4.03  | 3.99  | 4.06  | 4.16  | 4.20  | 4.17  |
| TC0100428 | SMAP2 /// SM/     | 64744  | stromal membrane-associated GTPase-       | 9.81E-05 | 4 | 10.34 | 9.82  | 9.73  | 9.79  | 9.66  | 9.70  | 9.78  | 9.94  |
| TC1201288 | SMARCC2           | 6601   | SWI/SNF related, matrix associated, act   | 1.22E-13 | 4 | 7.51  | 6.88  | 6.74  | 7.02  | 7.00  | 7.08  | 7.26  | 7.25  |
| TC1800012 | SMCHD1            | 23347  | structural maintenance of chromosom       | 3.41E-17 | 4 | 10.24 | 9.31  | 9.11  | 9.34  | 9.33  | 9.69  | 9.78  | 9.92  |
| TC1600908 | SMG1 /// NR_C     | 23049  | PI-3-kinase-related kinase SMG-1 ///      | 3.39E-06 | 4 | 6.98  | 6.43  | 6.16  | 6.14  | 6.15  | 6.22  | 6.36  | 6.21  |
| TC0102849 | SMG5              | 23381  | Smg-5 homolog, nonsense mediated m        | 2.44E-05 | 4 | 5.32  | 4.65  | 4.59  | 4.67  | 4.78  | 4.70  | 4.75  | 4.75  |
| TC0100317 | SMPDL3B           | 27293  | sphingomyelin phosphodiesterase, acic     | 4.69E-05 | 4 | 4.56  | 4.29  | 4.25  | 4.19  | 4.21  | 4.25  | 4.21  | 4.32  |
| TC1701621 | SMURF2            | 64750  | SMAD specific E3 ubiquitin protein liga   | 5.34E-07 | 4 | 6.05  | 5.80  | 5.62  | 5.58  | 5.57  | 5.83  | 5.89  | 5.91  |
| TC0401123 | SNCA              | 6622   | synuclein, alpha (non A4 component of     | 3.25E-06 | 4 | 6.72  | 4.75  | 4.54  | 5.08  | 5.25  | 5.25  | 5.13  | 5.22  |
| TC0102125 | SNIP1             | 79753  | Smad nuclear interacting protein 1        | 0.000424 | 4 | 6.51  | 6.38  | 6.11  | 6.24  | 6.19  | 6.28  | 6.41  | 6.40  |
| TC1701284 | SNORA21 ---       | ---    | small nucleolar RNA, H/ACA box 21 (SN     | 2.48E-06 | 4 | 4.65  | 3.35  | 3.54  | 3.51  | 3.45  | 3.68  | 3.72  | 3.82  |
| TC1101493 | SNORD31 /// S --- | ---    | small nucleolar RNA, C/D box 31 (SNOR     | 5.72E-09 | 4 | 3.46  | 2.89  | 2.91  | 2.96  | 3.18  | 3.16  | 3.20  | 3.11  |
| TC2200682 | SNORD43 ---       | ---    | small nucleolar RNA, C/D box 43 (SNOR     | 0.000536 | 4 | 4.85  | 3.90  | 3.99  | 3.99  | 4.38  | 4.04  | 3.90  | 3.98  |
| TC1201302 | SNORD59B ---      | ---    | small nucleolar RNA, C/D box 59B (SNO     | 0.000846 | 4 | 4.79  | 3.49  | 3.72  | 3.93  | 3.84  | 3.98  | 4.12  | 4.01  |
| TC1900706 | SNRP70            | 6625   | small nuclear ribonucleoprotein 70kDa     | 1.89E-33 | 4 | 6.39  | 5.17  | 5.15  | 5.16  | 5.29  | 5.22  | 5.21  | 5.10  |
| TC2100088 | SON               | 6651   | SON DNA binding protein /// SON prot      | 6.80E-06 | 4 | 7.74  | 7.43  | 7.15  | 7.18  | 7.16  | 7.24  | 7.42  | 7.35  |
| TC1100934 | SORL1             | 6653   | sortilin-related receptor, L(DLR class) A | 0.000369 | 4 | 10.63 | 10.11 | 10.27 | 10.30 | 10.09 | 10.12 | 10.03 | 10.09 |
| TC1701526 | SPAG9             | 9043   | sperm associated antigen 9 /// C-jun-ar   | 3.38E-16 | 4 | 8.04  | 6.99  | 6.75  | 6.90  | 6.89  | 7.20  | 7.31  | 7.40  |
| TC0100174 | SPEN              | 23013  | spen homolog, transcriptional regulato    | 7.35E-09 | 4 | 7.46  | 6.52  | 6.39  | 6.47  | 6.42  | 6.57  | 6.81  | 6.79  |
| TC1600683 | SPG7              | 6687   | spastic paraplegia 7 (pure and complic    | 3.13E-10 | 4 | 5.25  | 4.99  | 4.99  | 4.94  | 4.96  | 4.97  | 4.97  | 5.01  |
| TC1500243 | SPINT1            | 6692   | serine peptidase inhibitor, Kunitz type   | 1.33E-08 | 4 | 5.59  | 5.20  | 5.11  | 5.18  | 5.24  | 5.30  | 5.26  | 5.42  |
| TC1201242 | SPRYD3            | 84926  | SPRY domain containing 3                  | 2.66E-05 | 4 | 5.39  | 5.05  | 5.19  | 5.18  | 5.06  | 5.10  | 5.13  | 5.22  |
| TC1600748 | SPSB3             | 90864  | splA/ryanodine receptor domain and S      | 0.000891 | 4 | 5.84  | 5.61  | 5.64  | 5.67  | 5.65  | 5.67  | 5.65  | 5.61  |
| TC1600344 | SRCAP /// NP_(    | 10847  | Snf2-related CREBBP activator protein ,   | 2.60E-09 | 4 | 6.36  | 5.65  | 5.53  | 5.78  | 5.79  | 5.71  | 5.78  | 5.83  |



|           |                |        |                                             |          |   |      |      |      |      |      |      |      |      |
|-----------|----------------|--------|---------------------------------------------|----------|---|------|------|------|------|------|------|------|------|
| TC0101461 | SRGAP2         | 23380  | SLIT-ROBO Rho GTPase activating prote       | 6.44E-22 | 4 | 6.08 | 5.06 | 4.60 | 5.00 | 5.06 | 5.35 | 5.51 | 5.57 |
| TC0100900 | SRGAP2P1       | 653464 | SLIT-ROBO Rho GTPase activating prote       | 9.23E-20 | 4 | 6.42 | 5.50 | 5.21 | 5.46 | 5.53 | 5.79 | 5.92 | 6.01 |
| TC0701532 | SRPK2          | 6733   | SFRS protein kinase 2                       | 4.38E-12 | 4 | 7.88 | 6.90 | 6.90 | 7.18 | 7.03 | 7.23 | 7.29 | 7.42 |
| TC1600093 | SRRM2          | 23524  | serine/arginine repetitive matrix 2 /// S   | 7.40E-31 | 4 | 7.74 | 6.43 | 6.07 | 6.21 | 6.32 | 6.37 | 6.54 | 6.51 |
| TC1701195 | SSH2           | 85464  | slingshot homolog 2 (Drosophila) /// Pr     | 7.83E-05 | 4 | 9.22 | 8.77 | 8.73 | 8.82 | 8.66 | 8.70 | 8.76 | 8.82 |
| TC1100594 | SSH3           | 54961  | slingshot homolog 3 (Drosophila) /// Pr     | 3.16E-05 | 4 | 5.62 | 5.47 | 5.42 | 5.40 | 5.39 | 5.40 | 5.38 | 5.40 |
| TC0X00940 | SSX2B /// SSX2 | 727837 | // synovial sarcoma, X breakpoint 2B /// s  | 0.000292 | 4 | 3.72 | 3.42 | 3.56 | 3.41 | 3.44 | 3.43 | 3.49 | 3.45 |
| TC1701718 | ST6GALNAC2     | 10610  | ST6 (alpha-N-acetyl-neuraminy-2,3-be        | 7.83E-07 | 4 | 6.40 | 5.51 | 5.55 | 5.89 | 5.87 | 5.98 | 5.84 | 6.10 |
| TC0701328 | STAG3L1 /// NF | 54441  | stromal antigen 3-like 1 /// STAG3-like.    | 5.22E-08 | 4 | 6.77 | 6.36 | 6.31 | 6.37 | 6.55 | 6.49 | 6.56 | 6.50 |
| TC0700404 | STAG3L2 /// ST | 442582 | // stromal antigen 3-like 2 /// stromal ant | 4.00E-06 | 4 | 6.53 | 6.12 | 6.06 | 6.11 | 6.28 | 6.20 | 6.34 | 6.18 |
| TC0701309 | STAG3L2 /// ST | 442582 | // stromal antigen 3-like 2 /// stromal ant | 7.40E-06 | 4 | 6.46 | 5.98 | 5.93 | 6.01 | 6.14 | 6.16 | 6.26 | 6.12 |
| TC0700353 | STAG3L4        | 64940  | stromal antigen 3-like 4                    | 7.06E-12 | 4 | 4.29 | 3.60 | 3.58 | 3.64 | 3.77 | 3.91 | 3.95 | 4.01 |
| TC1201294 | STAT2          | 6773   | signal transducer and activator of trans    | 5.10E-09 | 4 | 6.69 | 5.63 | 5.37 | 5.51 | 5.28 | 5.89 | 6.22 | 6.43 |
| TC1201315 | STAT6          | 6778   | signal transducer and activator of trans    | 3.65E-11 | 4 | 7.68 | 6.48 | 6.42 | 6.75 | 6.68 | 6.71 | 6.57 | 6.72 |
| TC2000306 | STK4           | 6789   | serine/threonine kinase 4 /// Serine/th     | 1.72E-05 | 4 | 9.36 | 9.10 | 8.99 | 9.08 | 9.00 | 9.19 | 9.17 | 9.25 |
| TC0102113 | STK40          | 83931  | serine/threonine kinase 40 /// Serine/t     | 3.52E-05 | 4 | 6.88 | 6.29 | 6.05 | 6.43 | 6.37 | 6.44 | 6.35 | 6.51 |
| TC1901632 | STRN4          | 29888  | striatin, calmodulin binding protein 4      | 2.04E-07 | 4 | 5.76 | 5.26 | 5.30 | 5.43 | 5.41 | 5.35 | 5.28 | 5.33 |
| TC2000809 | SULF2          | 55959  | sulfatase 2 /// Extracellular sulfatase S   | 2.89E-20 | 4 | 8.19 | 6.57 | 5.43 | 6.39 | 6.34 | 7.12 | 7.17 | 7.49 |
| TC1600968 | SULT1A2        | 6799   | sulfotransferase family, cytosolic, 1A, p   | 2.77E-05 | 4 | 5.73 | 5.63 | 5.43 | 5.40 | 5.44 | 5.56 | 5.44 | 5.48 |
| TC0600800 | SUMO4          | 387082 | SMT3 suppressor of mif two 3 homolog        | 0.000288 | 4 | 4.40 | 3.90 | 3.94 | 3.88 | 3.85 | 3.90 | 3.89 | 4.03 |
| TC1200418 | SUOX           | 6821   | sulfite oxidase                             | 0.00036  | 4 | 5.29 | 4.94 | 4.96 | 4.97 | 4.99 | 5.02 | 5.07 | 5.10 |
| TC1700333 | SUZ12P         | ---    | SUZ12P protein. [Source:Uniprot/SPTRI       | 5.67E-14 | 4 | 6.96 | 6.22 | 6.28 | 6.42 | 6.51 | 6.55 | 6.66 | 6.64 |
| TC1901609 | SYMPK          | 8189   | symplekin /// Symplekin. [Source:Unipr      | 0.000306 | 4 | 5.42 | 5.18 | 5.18 | 5.28 | 5.28 | 5.27 | 5.31 | 5.26 |
| TC1400294 | SYNE2          | 23224  | spectrin repeat containing, nuclear env     | 1.21E-05 | 4 | 7.24 | 6.50 | 5.88 | 6.11 | 6.02 | 5.91 | 6.27 | 6.23 |
| TC1001074 | SYNPO2L        | 79933  | synaptopodin 2-like /// Synaptopodin 2      | 8.38E-07 | 4 | 3.82 | 3.64 | 3.55 | 3.51 | 3.49 | 3.50 | 3.53 | 3.59 |
| TC0103129 | SYT2           | 127833 | synaptotagmin II                            | 2.39E-14 | 4 | 4.91 | 4.37 | 4.24 | 4.22 | 4.35 | 4.42 | 4.39 | 4.42 |
| TC0800231 | TACC1          | 6867   | transforming, acidic coiled-coil containi   | 1.90E-13 | 4 | 7.89 | 7.21 | 7.29 | 7.41 | 7.30 | 7.47 | 7.56 | 7.64 |
| TC0X00340 | TAF1 /// Q70TC | 6872   | TAF1 RNA polymerase II, TATA box binc       | 0.000145 | 4 | 5.89 | 5.59 | 5.45 | 5.39 | 5.37 | 5.45 | 5.56 | 5.51 |
| TC2000878 | TAF4           | 6874   | TAF4 RNA polymerase II, TATA box binc       | 2.82E-11 | 4 | 5.83 | 5.24 | 5.19 | 5.37 | 5.40 | 5.50 | 5.55 | 5.58 |
| TC1100597 | TBC1D10C       | 374403 | TBC1 domain family, member 10C              | 3.87E-09 | 4 | 5.78 | 5.46 | 5.44 | 5.40 | 5.42 | 5.46 | 5.45 | 5.42 |
| TC1900733 | TBC1D17        | 79735  | TBC1 domain family, member 17               | 7.64E-13 | 4 | 5.72 | 5.36 | 5.32 | 5.33 | 5.34 | 5.37 | 5.35 | 5.38 |
| TC2200366 | TBC1D22A       | 25771  | TBC1 domain family, member 22A /// T        | 3.54E-15 | 4 | 7.21 | 6.36 | 6.27 | 6.42 | 6.39 | 6.54 | 6.55 | 6.63 |
| TC1701268 | TBC1D3E /// TE | 729877 | // TBC1 domain family, member 3E /// TB     | 1.21E-08 | 4 | 5.30 | 4.77 | 4.73 | 4.77 | 4.85 | 4.77 | 4.79 | 4.71 |
| TC1701269 | TBC1D3H /// TI | 727735 | TBC1 domain family, member 3H /// TE        | 1.50E-07 | 4 | 6.57 | 6.00 | 6.02 | 6.02 | 6.01 | 6.00 | 5.96 | 6.06 |

|           |                         |                                                 |          |   |       |      |      |      |      |      |      |      |
|-----------|-------------------------|-------------------------------------------------|----------|---|-------|------|------|------|------|------|------|------|
| TC0700743 | TBXAS1                  | 6916 thromboxane A synthase 1 (platelet, cy     | 0.000269 | 4 | 7.47  | 6.93 | 7.08 | 7.03 | 6.86 | 6.94 | 7.02 | 7.04 |
| TC0701361 | tcag7.1017              | 441272 similar to Williams Beuren syndrome cl   | 3.69E-19 | 4 | 6.76  | 5.91 | 5.81 | 5.94 | 5.92 | 5.97 | 6.06 | 6.00 |
| TC2200721 | TCF20                   | 6942 transcription factor 20 (AR1)              | 4.53E-12 | 4 | 7.17  | 6.26 | 5.86 | 6.22 | 6.25 | 6.41 | 6.66 | 6.73 |
| TC1600692 | TCF25                   | 22980 transcription factor 25 (basic helix-loop | 5.04E-12 | 4 | 6.83  | 6.27 | 6.01 | 6.13 | 6.11 | 6.17 | 6.20 | 6.25 |
| TC1100608 | TCIRG1                  | 10312 T-cell, immune regulator 1, ATPase, H+    | 1.90E-09 | 4 | 6.71  | 6.35 | 6.32 | 6.31 | 6.32 | 6.32 | 6.25 | 6.29 |
| TC1200695 | TCTN1                   | 79600 tectonic family member 1 /// Tectonic-    | 1.38E-33 | 4 | 4.03  | 3.10 | 3.13 | 3.09 | 3.11 | 3.27 | 3.34 | 3.51 |
| TC0900106 | TEK                     | 7010 TEK tyrosine kinase, endothelial (venou    | 4.30E-08 | 4 | 3.19  | 2.73 | 2.73 | 2.70 | 2.72 | 2.86 | 2.80 | 2.87 |
| TC1400668 | TEP1                    | 7011 telomerase-associated protein 1 /// Tel    | 2.07E-11 | 4 | 5.63  | 4.88 | 5.06 | 5.06 | 4.93 | 4.99 | 5.06 | 5.10 |
| TC0400436 | TET2 /// KIAA1          | 54790 tet oncogene family member 2 /// CDN      | 7.06E-10 | 4 | 8.84  | 8.30 | 8.12 | 8.06 | 7.80 | 7.95 | 8.13 | 8.11 |
| TC0300121 | TGFBR2                  | 7048 transforming growth factor, beta recep     | 2.74E-08 | 4 | 8.80  | 7.98 | 8.08 | 8.22 | 7.98 | 8.24 | 8.14 | 8.38 |
| TC2000024 | TGM3                    | 7053 transglutaminase 3 (E polypeptide, pro     | 1.05E-06 | 4 | 4.71  | 4.68 | 4.48 | 4.43 | 4.50 | 4.72 | 4.60 | 4.67 |
| TC0102825 | THBS3                   | 7059 thrombospondin 3                           | 7.48E-11 | 4 | 5.54  | 5.04 | 5.03 | 5.11 | 5.11 | 5.05 | 5.08 | 5.05 |
| TC0100396 | THRAP3                  | 9967 thyroid hormone receptor associated p      | 3.97E-05 | 4 | 8.26  | 8.02 | 7.69 | 7.84 | 7.75 | 7.90 | 8.04 | 8.01 |
| TC1400104 | THTPA                   | 79178 thiamine triphosphatase                   | 6.69E-08 | 4 | 4.71  | 4.48 | 4.42 | 4.37 | 4.38 | 4.35 | 4.35 | 4.40 |
| TC0600838 | TIAM2 /// RBM 26230 /// | T-cell lymphoma invasion and metastas           | 2.69E-06 | 4 | 4.75  | 4.51 | 4.48 | 4.54 | 4.55 | 4.64 | 4.63 | 4.63 |
| TC0202399 | TIGD1                   | 200765 tigger transposable element derived 1    | 0.000616 | 4 | 2.96  | 2.53 | 2.63 | 2.61 | 2.65 | 2.64 | 2.80 | 2.70 |
| TC1700669 | TLK2                    | 11011 tousled-like kinase 2 /// Serine/threoni  | 0.000107 | 4 | 7.47  | 7.54 | 7.33 | 7.34 | 7.27 | 7.40 | 7.48 | 7.45 |
| TC0400884 | TLR6                    | 10333 toll-like receptor 6                      | 7.22E-05 | 4 | 7.90  | 7.30 | 7.54 | 7.51 | 7.27 | 7.64 | 7.61 | 7.74 |
| TC2000178 | TM9SF4                  | 9777 transmembrane 9 superfamily protein        | 0.000461 | 4 | 5.49  | 5.21 | 4.89 | 5.13 | 5.09 | 5.16 | 5.14 | 5.18 |
| TC0301555 | TMCC1                   | 23023 transmembrane and coiled-coil domair      | 4.43E-19 | 4 | 8.14  | 6.76 | 6.46 | 6.59 | 6.62 | 7.21 | 7.21 | 7.45 |
| TC0500534 | TMCO6                   | 55374 transmembrane and coiled-coil domair      | 0.000374 | 4 | 5.78  | 5.41 | 5.62 | 5.59 | 5.44 | 5.52 | 5.50 | 5.53 |
| TC1601205 | TMED6                   | 146456 transmembrane emp24 protein transp       | 8.39E-05 | 4 | 3.21  | 2.75 | 2.85 | 2.76 | 2.92 | 2.78 | 2.76 | 2.82 |
| TC0202185 | TMEFF2                  | 23671 transmembrane protein with EGF-like ε     | 0.000126 | 4 | 2.99  | 2.84 | 2.83 | 2.74 | 2.85 | 2.85 | 2.74 | 2.81 |
| TC2100166 | TMEM1                   | 7109 transmembrane protein 1                    | 0.000116 | 4 | 6.40  | 6.12 | 5.97 | 6.04 | 5.98 | 6.05 | 6.14 | 6.14 |
| TC0400010 | TMEM175                 | 84286 transmembrane protein 175                 | 9.47E-06 | 4 | 5.08  | 4.84 | 4.79 | 4.83 | 4.81 | 4.75 | 4.75 | 4.77 |
| TC1901177 | TMEM205 /// F374882 //  | transmembrane protein 205 /// RAB3D             | 0.000165 | 4 | 5.54  | 5.38 | 5.29 | 5.38 | 5.50 | 5.40 | 5.32 | 5.36 |
| TC1700647 | TMEM49                  | 81671 transmembrane protein 49                  | 7.26E-07 | 4 | 10.17 | 9.49 | 9.41 | 9.59 | 9.57 | 9.82 | 9.78 | 9.97 |
| TC1400671 | TMEM55B                 | 90809 transmembrane protein 55B                 | 1.86E-14 | 4 | 5.77  | 5.15 | 5.17 | 5.26 | 5.28 | 5.41 | 5.43 | 5.36 |
| TC0103278 | TMEM63A                 | 9725 transmembrane protein 63A                  | 1.56E-06 | 4 | 5.79  | 5.86 | 5.32 | 5.62 | 5.91 | 5.77 | 5.70 | 5.55 |
| TC0102741 | TMOD4                   | 29765 tropomodulin 4 (muscle)                   | 2.94E-09 | 4 | 4.58  | 4.17 | 4.19 | 4.08 | 4.11 | 4.16 | 4.27 | 4.21 |
| TC1400604 | TNFAIP2                 | 7127 tumor necrosis factor, alpha-induced p     | 1.61E-17 | 4 | 7.52  | 5.86 | 5.86 | 6.15 | 6.18 | 6.44 | 6.37 | 6.60 |
| TC0800799 | TNFRSF10B               | 8795 tumor necrosis factor receptor superfa     | 3.53E-16 | 4 | 5.64  | 4.89 | 4.76 | 4.85 | 4.83 | 5.01 | 4.99 | 5.15 |
| TC0800149 | TNFRSF10C               | 8794 tumor necrosis factor receptor superfa     | 0.000266 | 4 | 8.82  | 8.63 | 8.48 | 8.38 | 8.28 | 8.54 | 8.48 | 8.57 |
| TC0101796 | TNFRSF14                | 8764 tumor necrosis factor receptor superfa     | 3.22E-10 | 4 | 5.64  | 5.19 | 5.24 | 5.30 | 5.28 | 5.34 | 5.32 | 5.38 |

|           |                                                                    |          |                                             |          |   |      |      |      |      |      |      |      |      |
|-----------|--------------------------------------------------------------------|----------|---------------------------------------------|----------|---|------|------|------|------|------|------|------|------|
| TC0101822 | TNFRSF9                                                            | 3604     | tumor necrosis factor receptor superfa      | 4.65E-05 | 4 | 5.06 | 4.46 | 4.51 | 4.50 | 4.48 | 4.85 | 4.77 | 4.77 |
| TC1901094 | TNFSF14                                                            | 8740     | tumor necrosis factor (ligand) superfan     | 0.000186 | 4 | 7.05 | 6.25 | 6.30 | 6.43 | 6.51 | 6.49 | 6.44 | 6.57 |
| TC1100046 | TNNT3                                                              | 7140     | troponin T type 3 (skeletal, fast) /// Tro  | 1.75E-10 | 4 | 5.77 | 5.36 | 5.37 | 5.36 | 5.37 | 5.33 | 5.31 | 5.36 |
| TC2200297 | TNRC6B                                                             | 23112    | trinucleotide repeat containing 6B          | 5.02E-08 | 4 | 8.00 | 7.40 | 7.25 | 7.42 | 7.35 | 7.48 | 7.55 | 7.63 |
| TC0100496 | TOE1                                                               | 114034   | target of EGR1, member 1 (nuclear)          | 4.96E-06 | 4 | 4.52 | 4.20 | 4.24 | 4.29 | 4.25 | 4.34 | 4.31 | 4.34 |
| TC1701085 | TOM1L2                                                             | 146691   | target of myb1-like 2 (chicken) /// TOM     | 2.84E-08 | 4 | 5.45 | 4.85 | 4.81 | 4.81 | 4.84 | 4.92 | 4.93 | 4.96 |
| TC1701089 | TOP3A                                                              | 7156     | topoisomerase (DNA) III alpha               | 1.32E-08 | 4 | 5.90 | 5.36 | 5.16 | 5.42 | 5.48 | 5.52 | 5.54 | 5.53 |
| TC2200487 | TOP3B                                                              | 8940     | topoisomerase (DNA) III beta                | 0.000632 | 4 | 4.77 | 4.61 | 4.67 | 4.59 | 4.60 | 4.59 | 4.61 | 4.61 |
| TC1500890 | TP53BP1                                                            | 7158     | tumor protein p53 binding protein 1 //      | 3.55E-14 | 4 | 5.33 | 5.09 | 4.70 | 4.72 | 4.75 | 4.98 | 5.10 | 5.09 |
| TC0801130 | TP53INP1                                                           | 94241    | tumor protein p53 inducible nuclear pr      | 2.44E-07 | 4 | 8.46 | 7.63 | 7.78 | 7.88 | 7.75 | 7.93 | 7.79 | 7.98 |
| TC2000212 | TP53INP2                                                           | 58476    | tumor protein p53 inducible nuclear pr      | 1.58E-11 | 4 | 5.62 | 5.41 | 5.04 | 5.17 | 5.32 | 5.37 | 5.28 | 5.48 |
| TC0103079 | TPR                                                                | 7175     | translocated promoter region (to activa     | 0.000257 | 4 | 8.34 | 7.62 | 7.41 | 7.42 | 7.29 | 7.47 | 7.89 | 7.74 |
| TC0701062 | TRA2A                                                              | 29896    | transformer-2 alpha                         | 1.06E-09 | 4 | 7.94 | 7.33 | 7.19 | 7.22 | 7.20 | 7.42 | 7.54 | 7.49 |
| TC1900957 | TRIM28                                                             | 10155    | tripartite motif-containing 28 /// Trans    | 3.33E-08 | 4 | 5.57 | 5.29 | 5.28 | 5.33 | 5.32 | 5.38 | 5.36 | 5.37 |
| TC0600238 | TRIM40                                                             | 135644   | tripartite motif-containing 40 /// Tripar   | 9.27E-07 | 4 | 5.22 | 4.91 | 4.93 | 4.77 | 4.86 | 4.95 | 4.93 | 4.94 |
| TC0700562 | TRIM56                                                             | 81844    | tripartite motif-containing 56              | 8.73E-07 | 4 | 5.83 | 5.53 | 5.46 | 5.50 | 5.53 | 5.62 | 5.71 | 5.68 |
| TC0301707 | TRIM59 /// IFT;286827 // tripartite motif-containing 59 /// intraf | 0.000487 |                                             |          | 4 | 3.00 | 2.82 | 2.82 | 2.83 | 2.89 | 2.89 | 2.94 | 2.92 |
| TC1101185 | TRIM66                                                             | ---      | Tripartite motif-containing protein 66.     | 9.53E-05 | 4 | 4.22 | 3.97 | 3.96 | 3.97 | 3.98 | 3.94 | 3.96 | 3.95 |
| TC2200260 | TRIOBP                                                             | 11078    | TRIO and F-actin binding protein            | 0.000455 | 4 | 5.66 | 5.51 | 5.39 | 5.46 | 5.53 | 5.51 | 5.47 | 5.50 |
| TC2200364 | TRMU                                                               | 55687    | tRNA 5-methylaminomethyl-2-thiourid         | 2.15E-07 | 4 | 4.30 | 3.87 | 3.89 | 4.00 | 3.89 | 3.89 | 3.97 | 3.96 |
| TC2000688 | TRPC4AP                                                            | 26133    | transient receptor potential cation cha     | 1.43E-10 | 4 | 7.01 | 6.56 | 6.41 | 6.45 | 6.46 | 6.55 | 6.54 | 6.52 |
| TC0901404 | TSC1                                                               | 7248     | tuberous sclerosis 1                        | 2.57E-16 | 4 | 5.81 | 5.00 | 4.82 | 5.00 | 5.06 | 5.06 | 5.15 | 5.11 |
| TC1600072 | TSC2                                                               | 7249     | tuberous sclerosis 2 /// Tuberin (Tuber     | 2.40E-05 | 4 | 5.42 | 5.15 | 5.13 | 5.17 | 5.16 | 5.15 | 5.12 | 5.14 |
| TC0700087 | TSPAN13                                                            | 27075    | tetraspanin 13                              | 0.00013  | 4 | 4.66 | 4.28 | 4.22 | 4.29 | 4.40 | 4.52 | 4.35 | 4.58 |
| TC1900188 | TSPAN16                                                            | 26526    | tetraspanin 16 /// Tetraspanin-16 (Tspa     | 1.36E-06 | 4 | 6.91 | 5.51 | 5.40 | 5.50 | 5.56 | 5.90 | 5.95 | 5.87 |
| TC0X00257 | TSPYL2                                                             | 64061    | TSPY-like 2                                 | 3.87E-13 | 4 | 4.61 | 3.76 | 3.64 | 3.63 | 3.69 | 3.75 | 4.01 | 3.97 |
| TC0100361 | TSSK3                                                              | 81629    | testis-specific serine kinase 3             | 2.36E-11 | 4 | 5.22 | 4.45 | 4.39 | 4.52 | 4.46 | 4.46 | 4.55 | 4.53 |
| TC1400123 | TSSK4                                                              | 283629   | testis-specific serine kinase 4 /// Testis- | 4.21E-05 | 4 | 4.93 | 4.50 | 4.63 | 4.49 | 4.48 | 4.57 | 4.54 | 4.59 |
| TC1100857 | TTC12                                                              | 54970    | tetratricopeptide repeat domain 12 ///      | 6.52E-06 | 4 | 3.73 | 3.57 | 3.55 | 3.56 | 3.53 | 3.57 | 3.56 | 3.62 |
| TC1100289 | TTC17                                                              | 55761    | tetratricopeptide repeat domain 17 ///      | 9.53E-07 | 4 | 5.73 | 5.21 | 5.14 | 5.28 | 5.29 | 5.29 | 5.48 | 5.36 |
| TC1001066 | TTC18                                                              | 118491   | tetratricopeptide repeat domain 18 ///      | 9.24E-12 | 4 | 2.96 | 2.55 | 2.64 | 2.59 | 2.60 | 2.57 | 2.60 | 2.63 |
| TC0901401 | TTF1                                                               | 7270     | transcription termination factor, RNA p     | 1.68E-11 | 4 | 5.31 | 4.50 | 4.33 | 4.48 | 4.50 | 4.67 | 4.96 | 4.96 |
| TC0300029 | TTLL3 /// ARPC 26140 /// tubulin tyrosine ligase-like family, mem  | 7.79E-10 |                                             |          | 4 | 5.80 | 5.47 | 5.44 | 5.48 | 5.51 | 5.49 | 5.44 | 5.42 |
| TC0201105 | TTLL4                                                              | 9654     | tubulin tyrosine ligase-like family, mem    | 2.93E-11 | 4 | 5.65 | 4.79 | 4.68 | 4.90 | 5.07 | 5.29 | 5.19 | 5.23 |

|           |                 |                                                   |          |   |       |       |       |       |       |       |       |       |
|-----------|-----------------|---------------------------------------------------|----------|---|-------|-------|-------|-------|-------|-------|-------|-------|
| TC0Y00166 | TTY10_HUMAN --- | Transcript Y 10 protein. [Source:Unipro           | 0.000234 | 4 | 4.78  | 4.33  | 4.30  | 4.25  | 4.27  | 4.36  | 4.43  | 4.44  |
| TC0Y00120 | TTY8_HUMAN ---  | Transcript Y 8 protein. [Source:Uniprot,          | 0.000798 | 4 | 3.19  | 2.92  | 2.94  | 2.88  | 2.77  | 2.78  | 2.82  | 2.95  |
| TC1300659 | TUBGCP3         | 10426 tubulin, gamma complex associated pr        | 1.46E-11 | 4 | 5.82  | 5.06  | 5.63  | 5.87  | 5.65  | 5.43  | 5.49  | 5.43  |
| TC2200777 | TUBGCP6         | 85378 tubulin, gamma complex associated pr        | 2.68E-06 | 4 | 4.62  | 4.42  | 4.44  | 4.39  | 4.42  | 4.41  | 4.40  | 4.42  |
| TC0101037 | TUFT1           | 7286 tuftelin 1 /// Tuftelin. [Source:Uniprot/    | 2.76E-07 | 4 | 4.78  | 4.33  | 4.31  | 4.40  | 4.42  | 4.57  | 4.51  | 4.62  |
| TC0301233 | TUSC4           | 10641 tumor suppressor candidate 4                | 1.63E-11 | 4 | 5.36  | 4.80  | 4.90  | 5.05  | 4.97  | 4.95  | 4.99  | 5.01  |
| TC1400861 | TXNDC16         | 57544 thioredoxin domain containing 16            | 3.01E-18 | 4 | 3.58  | 2.87  | 2.96  | 2.99  | 2.99  | 3.05  | 3.19  | 3.20  |
| TC0100929 | TXNIP           | 10628 thioredoxin interacting protein             | 3.76E-08 | 4 | 11.08 | 10.53 | 10.32 | 10.62 | 10.46 | 10.69 | 10.74 | 10.90 |
| TC1901161 | TYK2            | 7297 tyrosine kinase 2                            | 4.71E-14 | 4 | 5.86  | 5.20  | 5.25  | 5.32  | 5.24  | 5.25  | 5.22  | 5.28  |
| TC1901417 | U2AF1L4 /// TM  | 199746 // U2 small nuclear RNA auxiliary factor 1 | 6.58E-12 | 4 | 5.98  | 5.61  | 5.54  | 5.52  | 5.54  | 5.57  | 5.49  | 5.57  |
| TC1900892 | U2AF2           | 11338 U2 small nuclear RNA auxiliary factor 2     | 0.000185 | 4 | 5.29  | 4.95  | 4.88  | 4.99  | 5.03  | 5.02  | 5.03  | 5.01  |
| TC0301218 | UBA7 /// SIRPA  | 7318 ubiquitin-like modifier activating enzym     | 8.52E-12 | 4 | 6.27  | 5.35  | 5.33  | 5.52  | 5.41  | 5.46  | 5.60  | 5.63  |
| TC0101093 | UBAP2L          | 9898 ubiquitin associated protein 2-like /// L    | 1.26E-09 | 4 | 7.24  | 6.81  | 6.70  | 6.83  | 6.82  | 6.93  | 6.96  | 7.01  |
| TC1201671 | UBC             | 7316 ubiquitin C /// Ubiquitin. [Source:Unipr     | 0.000819 | 4 | 11.03 | 10.73 | 10.78 | 10.81 | 10.76 | 10.83 | 10.83 | 10.90 |
| TC0100104 | UBE4B           | 10277 ubiquitination factor E4B (UFD2 homol       | 7.18E-08 | 4 | 7.57  | 6.82  | 6.81  | 6.88  | 6.84  | 6.90  | 6.95  | 6.97  |
| TC1600145 | UBN1            | 29855 ubinuclein 1                                | 1.45E-08 | 4 | 8.12  | 7.53  | 7.21  | 7.55  | 7.60  | 7.76  | 7.70  | 7.81  |
| TC0600389 | UBR2            | 23304 ubiquitin protein ligase E3 component       | 5.97E-14 | 4 | 9.00  | 7.97  | 7.98  | 8.24  | 8.09  | 8.34  | 8.39  | 8.54  |
| TC0101937 | UBR4            | 23352 ubiquitin protein ligase E3 component       | 2.77E-06 | 4 | 6.55  | 6.16  | 5.93  | 6.04  | 6.02  | 5.96  | 6.02  | 5.93  |
| TC1101652 | UCP3            | 7352 uncoupling protein 3 (mitochondrial, p       | 5.23E-05 | 4 | 4.45  | 4.11  | 4.12  | 4.15  | 4.18  | 4.20  | 4.14  | 4.08  |
| TC0400276 | UGT2B10         | 7365 UDP glucuronosyltransferase 2 family,        | 7.65E-07 | 4 | 2.62  | 2.19  | 2.30  | 2.39  | 2.33  | 2.30  | 2.49  | 2.49  |
| TC0401011 | UGT2B11         | 10720 UDP glucuronosyltransferase 2 family,       | 3.38E-14 | 4 | 4.29  | 2.76  | 2.91  | 3.27  | 3.03  | 3.39  | 3.66  | 3.59  |
| TC0400280 | UGT2B28 /// U   | 54490 UDP glucuronosyltransferase 2 family,       | 5.89E-09 | 4 | 2.90  | 2.28  | 2.35  | 2.50  | 2.35  | 2.50  | 2.57  | 2.71  |
| TC1701167 | UNC119          | 9094 unc-119 homolog (C. elegans)                 | 2.81E-06 | 4 | 6.52  | 5.60  | 5.62  | 5.95  | 5.88  | 5.93  | 5.93  | 6.02  |
| TC1700766 | UNK             | 85451 unkempt homolog (Drosophila)                | 2.15E-05 | 4 | 4.93  | 4.72  | 4.59  | 4.66  | 4.66  | 4.71  | 4.78  | 4.81  |
| TC1900328 | UPF1            | 5976 UPF1 regulator of nonsense transcripts       | 1.52E-07 | 4 | 5.44  | 4.86  | 4.77  | 4.88  | 4.87  | 4.91  | 4.95  | 5.05  |
| TC1000766 | UPF2            | 26019 UPF2 regulator of nonsense transcripts      | 6.09E-09 | 4 | 7.73  | 7.11  | 7.03  | 7.09  | 7.07  | 7.24  | 7.44  | 7.43  |
| TC0102929 | USF1            | 7391 upstream transcription factor 1 /// Ups      | 2.90E-11 | 4 | 6.63  | 5.63  | 5.58  | 5.88  | 5.70  | 5.89  | 5.94  | 6.10  |
| TC1900436 | USF2            | 7392 upstream transcription factor 2, c-fos ir    | 0.000442 | 4 | 6.71  | 6.53  | 6.44  | 6.76  | 6.72  | 6.56  | 6.57  | 6.54  |
| TC1200469 | USP15           | 9958 ubiquitin specific peptidase 15 /// Ubiq     | 7.17E-06 | 4 | 9.33  | 8.79  | 8.82  | 8.84  | 8.67  | 8.83  | 8.86  | 8.93  |
| TC0301200 | USP19           | 10869 ubiquitin specific peptidase 19 /// Ubiq    | 3.25E-09 | 4 | 5.65  | 5.22  | 5.14  | 5.26  | 5.19  | 5.26  | 5.29  | 5.37  |
| TC0101204 | USP21           | 27005 ubiquitin specific peptidase 21 /// Ubiq    | 0.000564 | 4 | 4.79  | 4.49  | 4.52  | 4.63  | 4.66  | 4.60  | 4.66  | 4.62  |
| TC0101964 | USP48           | 84196 ubiquitin specific peptidase 48 /// Ubiq    | 3.19E-05 | 4 | 6.68  | 6.01  | 6.06  | 6.22  | 6.20  | 6.14  | 6.30  | 6.23  |
| TC1701215 | UTP6            | 55813 UTP6, small subunit (SSU) processome        | 9.49E-23 | 4 | 6.58  | 5.16  | 5.19  | 5.45  | 5.44  | 5.76  | 6.04  | 6.13  |
| TC0600781 | UTRN            | 7402 utrophin /// Utrophin (Dystrophin-relat      | 7.93E-16 | 4 | 7.60  | 6.68  | 6.39  | 6.60  | 6.35  | 6.70  | 7.00  | 7.01  |

|           |               |                                                 |          |   |      |      |      |      |      |      |      |      |
|-----------|---------------|-------------------------------------------------|----------|---|------|------|------|------|------|------|------|------|
| TC1200902 | VAMP1         | 6843 vesicle-associated membrane protein 1      | 1.95E-22 | 4 | 6.70 | 5.63 | 5.71 | 5.79 | 5.84 | 5.93 | 6.08 | 6.03 |
| TC1701004 | VAMP2         | 6844 vesicle-associated membrane protein 2      | 2.34E-12 | 4 | 8.05 | 7.44 | 7.24 | 7.30 | 7.25 | 7.41 | 7.50 | 7.66 |
| TC0601611 | VNN3          | 55350 vanin 3 /// Vascular non-inflammatory     | 1.19E-13 | 4 | 8.08 | 6.87 | 6.13 | 6.26 | 6.42 | 6.89 | 6.81 | 7.17 |
| TC0800460 | VPS13B        | 157680 vacuolar protein sorting 13 homolog B    | 2.31E-09 | 4 | 6.97 | 6.39 | 6.46 | 6.38 | 6.21 | 6.39 | 6.36 | 6.40 |
| TC1500872 | VPS39         | 23339 vacuolar protein sorting 39 homolog (S    | 2.56E-06 | 4 | 6.78 | 6.12 | 5.98 | 6.14 | 6.04 | 6.14 | 6.24 | 6.22 |
| TC0701148 | VPS41         | 27072 vacuolar protein sorting 41 homolog (S    | 9.80E-15 | 4 | 6.65 | 5.69 | 5.61 | 5.54 | 5.36 | 5.77 | 5.99 | 6.14 |
| TC0601174 | VPS52         | 6293 vacuolar protein sorting 52 homolog (S     | 0.000104 | 4 | 4.61 | 4.36 | 4.36 | 4.32 | 4.28 | 4.36 | 4.34 | 4.35 |
| TC0300863 | VPS8          | 23355 vacuolar protein sorting 8 homolog (S.    | 2.04E-14 | 4 | 7.48 | 6.17 | 6.44 | 6.66 | 6.52 | 6.68 | 6.68 | 6.68 |
| TC0102907 | VSIG8         | 391123 V-set and immunoglobulin domain con      | 0.0002   | 4 | 4.33 | 4.06 | 4.10 | 4.12 | 4.13 | 4.08 | 4.10 | 4.16 |
| TC1200894 | VWF           | 7450 von Willebrand factor /// von Willebrai    | 0.000979 | 4 | 4.56 | 4.33 | 4.32 | 4.31 | 4.37 | 4.37 | 4.35 | 4.33 |
| TC0101731 | WASH1 /// Q7i | 375690 WAS protein family homolog 1 /// FAM     | 6.22E-12 | 4 | 6.06 | 5.67 | 5.58 | 5.62 | 5.68 | 5.72 | 5.72 | 5.67 |
| TC1500692 | WASH1 /// Q9I | 375690 WAS protein family homolog 1 /// Prot    | 7.62E-10 | 4 | 5.69 | 5.34 | 5.34 | 5.31 | 5.37 | 5.39 | 5.38 | 5.34 |
| TC1201015 | WBP11         | 730693 // WW domain binding protein 11          | 7.47E-14 | 4 | 8.21 | 7.99 | 7.45 | 7.24 | 7.35 | 7.71 | 7.94 | 8.05 |
| TC0400167 | WDR19         | 57728 WD repeat domain 19                       | 5.69E-18 | 4 | 3.65 | 3.12 | 3.09 | 3.06 | 3.04 | 3.21 | 3.29 | 3.30 |
| TC0102916 | WDR42A        | 50717 WD repeat domain 42A                      | 3.37E-09 | 4 | 5.80 | 5.26 | 5.23 | 5.43 | 5.34 | 5.32 | 5.46 | 5.38 |
| TC0X00912 | WDR45         | 11152 WD repeat domain 45 /// WD repeat d       | 3.28E-07 | 4 | 6.21 | 5.93 | 5.91 | 5.97 | 5.90 | 5.87 | 5.86 | 5.89 |
| TC0601175 | WDR46 /// NM  | 9277 WD repeat domain 46 /// WD repeat d        | 0.000193 | 4 | 4.46 | 4.13 | 4.09 | 3.94 | 4.07 | 4.08 | 4.04 | 4.03 |
| TC0301456 | WDR52         | 55779 WD repeat domain 52 /// WD repeat d       | 1.13E-05 | 4 | 2.89 | 2.66 | 2.67 | 2.69 | 2.69 | 2.70 | 2.72 | 2.70 |
| TC1601260 | WDR59         | 79726 WD repeat domain 59                       | 0.000333 | 4 | 4.96 | 4.68 | 4.71 | 4.75 | 4.78 | 4.79 | 4.84 | 4.81 |
| TC1500968 | WDR72         | 256764 WD repeat domain 72                      | 2.68E-06 | 4 | 2.97 | 2.78 | 2.79 | 2.74 | 2.76 | 2.78 | 2.73 | 2.73 |
| TC1501202 | WDR73         | 84942 WD repeat domain 73 /// WD repeat d       | 7.02E-10 | 4 | 5.11 | 4.72 | 4.71 | 4.75 | 4.77 | 4.91 | 4.96 | 4.97 |
| TC0301252 | WDR82 /// NM  | 80335 WD repeat domain 82 /// MSTP107. [St      | 7.28E-07 | 4 | 6.86 | 6.23 | 6.34 | 6.51 | 6.30 | 6.47 | 6.52 | 6.59 |
| TC0901477 | WDR85         | 92715 WD repeat domain 85                       | 0.000142 | 4 | 4.32 | 4.09 | 4.11 | 4.09 | 4.08 | 4.13 | 4.08 | 4.09 |
| TC0701654 | WDR91         | 29062 WD repeat domain 91 /// WD repeat d       | 1.11E-15 | 4 | 5.55 | 5.04 | 4.95 | 5.07 | 5.05 | 5.17 | 5.17 | 5.18 |
| TC0202113 | WIPF1         | 7456 WAS/WASL interacting protein family, i     | 1.81E-09 | 4 | 9.34 | 8.76 | 8.64 | 8.82 | 8.76 | 8.94 | 9.01 | 9.13 |
| TC0700038 | WIPI2         | 26100 WD repeat domain, phosphoinositide i      | 1.45E-05 | 4 | 6.41 | 6.11 | 5.99 | 6.14 | 6.04 | 6.21 | 6.19 | 6.25 |
| TC1200005 | WNK1          | 65125 WNK lysine deficient protein kinase 1 /   | 0.000128 | 4 | 8.30 | 7.71 | 7.61 | 7.76 | 7.67 | 7.73 | 7.83 | 7.82 |
| TC0X00032 | WWC3          | 55841 WWC family member 3                       | 4.12E-07 | 4 | 6.68 | 5.92 | 5.85 | 6.07 | 5.96 | 6.09 | 6.04 | 6.11 |
| TC1600559 | WWP2          | 11060 WW domain containing E3 ubiquitin pr      | 0.000773 | 4 | 7.95 | 7.38 | 7.24 | 7.39 | 7.30 | 7.35 | 7.31 | 7.42 |
| TC0800372 | XKR9          | 389668 XK, Kell blood group complex subunit-r   | 5.13E-05 | 4 | 2.64 | 2.35 | 2.40 | 2.29 | 2.34 | 2.32 | 2.40 | 2.36 |
| TC0301029 | XPC           | 7508 xeroderma pigmentosum, complement          | 1.11E-15 | 4 | 7.31 | 6.07 | 6.16 | 6.65 | 6.47 | 6.65 | 6.76 | 6.82 |
| TC1101665 | XRRA1         | --- X-ray radiation resistance-associated pi    | 2.66E-10 | 4 | 4.91 | 4.35 | 4.34 | 4.47 | 4.42 | 4.44 | 4.49 | 4.56 |
| TC0102627 | XXyac-YX155B€ | 728920 // phosphodiesterase 4D interacting prot | 1.12E-08 | 4 | 4.44 | 4.26 | 4.25 | 4.28 | 4.29 | 4.29 | 4.34 | 4.36 |
| TC1600899 | XYLT1         | 64131 xylosyltransferase I                      | 1.02E-07 | 4 | 5.33 | 4.84 | 4.65 | 4.90 | 4.84 | 5.03 | 5.08 | 5.16 |

|           |                |        |                                            |          |   |      |      |      |      |      |      |      |      |
|-----------|----------------|--------|--------------------------------------------|----------|---|------|------|------|------|------|------|------|------|
| TC1600998 | YPEL3          | 83719  | yippee-like 3 (Drosophila)                 | 1.05E-18 | 4 | 7.02 | 6.29 | 6.18 | 6.32 | 6.31 | 6.42 | 6.38 | 6.45 |
| TC0401003 | YTHDC1         | 91746  | YTH domain containing 1                    | 6.66E-15 | 4 | 7.86 | 7.37 | 7.11 | 7.10 | 7.02 | 7.35 | 7.48 | 7.62 |
| TC2200208 | YV007_HUMAN    | ---    | Putative uncharacterized protein MGC:      | 0.000274 | 4 | 4.55 | 4.00 | 3.96 | 3.92 | 4.03 | 4.12 | 4.45 | 4.23 |
| TC0102837 | YY1AP1         | 55249  | YY1 associated protein 1 /// YY1-associ    | 7.88E-06 | 4 | 7.62 | 7.32 | 7.20 | 7.37 | 7.34 | 7.38 | 7.36 | 7.38 |
| TC0101438 | ZC3H11A        | 9877   | zinc finger CCCH-type containing 11A       | 0.000449 | 4 | 8.55 | 8.24 | 7.97 | 8.18 | 8.08 | 8.15 | 8.17 | 8.14 |
| TC0X00302 | ZC3H12B        | 340554 | zinc finger CCCH-type containing 12B //    | 0.000158 | 4 | 2.84 | 2.63 | 2.64 | 2.61 | 2.62 | 2.61 | 2.55 | 2.62 |
| TC0901094 | ZCCHC6         | 79670  | zinc finger, CCHC domain containing 6 ,    | 1.17E-18 | 4 | 9.39 | 8.53 | 8.35 | 8.42 | 8.35 | 8.74 | 8.87 | 9.01 |
| TC0701478 | ZCWPW1         | 55063  | zinc finger, CW type with PWWP doma        | 1.40E-30 | 4 | 6.24 | 4.64 | 4.43 | 4.69 | 4.70 | 4.82 | 4.97 | 5.13 |
| TC0100298 | ZDHC18         | 84243  | zinc finger, DHHC-type containing 18 //    | 3.69E-05 | 4 | 9.15 | 8.48 | 8.15 | 8.51 | 8.52 | 8.69 | 8.47 | 8.74 |
| TC0201113 | ZFAND2B        | 130617 | zinc finger, AN1-type domain 2B            | 0.000148 | 4 | 5.94 | 5.76 | 5.63 | 5.64 | 5.76 | 5.77 | 5.72 | 5.68 |
| TC1000493 | ZFYVE27        | 118813 | zinc finger, FYVE domain containing 27     | 2.48E-19 | 4 | 5.42 | 4.81 | 4.74 | 4.77 | 4.79 | 4.89 | 4.89 | 4.92 |
| TC0800532 | ZHX2           | 22882  | zinc fingers and homeoboxes 2              | 0.000395 | 4 | 6.45 | 6.54 | 5.91 | 6.08 | 5.95 | 6.19 | 6.17 | 6.31 |
| TC1000369 | ZMIZ1          | 57178  | zinc finger, MIZ-type containing 1 /// Zi  | 2.46E-07 | 4 | 6.74 | 5.90 | 5.87 | 6.21 | 6.02 | 6.12 | 6.22 | 6.33 |
| TC1001069 | ZMYND17        | 118490 | zinc finger, MYND-type containing 17       | 5.04E-05 | 4 | 3.83 | 3.55 | 3.60 | 3.52 | 3.51 | 3.47 | 3.52 | 3.48 |
| TC0701264 | ZNF117         | 51351  | zinc finger protein 117 /// Zinc finger p  | 5.83E-23 | 4 | 7.69 | 5.88 | 5.79 | 6.08 | 5.94 | 6.35 | 6.52 | 6.74 |
| TC1900786 | ZNF137         | ---    | Zinc finger protein 137. [Source:Unipro    | 4.36E-10 | 4 | 3.25 | 2.59 | 2.57 | 2.69 | 2.58 | 2.73 | 2.82 | 2.74 |
| TC1901326 | ZNF14          | 7561   | zinc finger protein 14 /// Zinc finger prc | 1.58E-05 | 4 | 4.44 | 4.20 | 4.19 | 4.18 | 4.09 | 4.26 | 4.34 | 4.43 |
| TC1901775 | ZNF160         | 90338  | zinc finger protein 160 /// Zinc finger p  | 2.03E-07 | 4 | 5.00 | 4.74 | 4.62 | 4.64 | 4.53 | 4.57 | 4.74 | 4.79 |
| TC0600196 | ZNF165         | 7718   | zinc finger protein 165                    | 0.000163 | 4 | 3.67 | 3.53 | 3.59 | 3.46 | 3.43 | 3.46 | 3.52 | 3.61 |
| TC0900400 | ZNF169         | 169841 | zinc finger protein 169 /// Zinc finger p  | 0.000165 | 4 | 4.30 | 4.12 | 4.13 | 4.05 | 4.05 | 4.03 | 4.13 | 4.10 |
| TC1701038 | ZNF18          | 7566   | zinc finger protein 18                     | 0.000142 | 4 | 5.64 | 5.27 | 5.25 | 5.35 | 5.32 | 5.41 | 5.40 | 5.46 |
| TC1901582 | ZNF180         | 7733   | zinc finger protein 180                    | 6.90E-05 | 4 | 5.16 | 4.94 | 4.89 | 4.94 | 4.90 | 4.99 | 4.99 | 5.03 |
| TC0X00892 | ZNF182 /// ZNF | 7569   | zinc finger protein 182 /// Zinc finger p  | 8.39E-05 | 4 | 5.71 | 5.36 | 5.35 | 5.29 | 5.19 | 5.40 | 5.46 | 5.48 |
| TC0600204 | ZNF187         | 7741   | zinc finger protein 187                    | 3.07E-09 | 4 | 4.08 | 3.58 | 3.64 | 3.68 | 3.70 | 3.73 | 3.77 | 3.88 |
| TC1900936 | ZNF211 /// ZNF | 10520  | zinc finger protein 211 /// zinc finger pi | 6.30E-08 | 4 | 5.09 | 4.68 | 4.67 | 4.61 | 4.49 | 4.66 | 4.78 | 4.90 |
| TC1900606 | ZNF226         | 7769   | zinc finger protein 226                    | 3.76E-11 | 4 | 4.43 | 4.24 | 4.15 | 3.94 | 3.96 | 4.18 | 4.33 | 4.33 |
| TC1901578 | ZNF235         | 9310   | zinc finger protein 235 /// Zinc finger p  | 0.00021  | 4 | 3.64 | 3.52 | 3.60 | 3.44 | 3.50 | 3.50 | 3.63 | 3.60 |
| TC0101672 | ZNF238         | 10472  | zinc finger protein 238                    | 1.06E-12 | 4 | 7.75 | 6.78 | 6.86 | 6.98 | 6.81 | 7.16 | 7.14 | 7.19 |
| TC1900362 | ZNF257         | 113835 | zinc finger protein 257                    | 0.00051  | 4 | 4.01 | 3.85 | 3.83 | 3.78 | 3.89 | 3.88 | 3.83 | 3.93 |
| TC1600120 | ZNF263         | 10127  | zinc finger protein 263                    | 1.13E-08 | 4 | 4.78 | 4.51 | 4.36 | 4.44 | 4.42 | 4.63 | 4.59 | 4.62 |
| TC1901142 | ZNF266         | 10781  | zinc finger protein 266                    | 6.90E-22 | 4 | 4.97 | 4.21 | 4.09 | 4.07 | 4.04 | 4.09 | 4.22 | 4.30 |
| TC1900949 | ZNF274         | 10782  | zinc finger protein 274                    | 4.44E-08 | 4 | 4.82 | 4.61 | 4.50 | 4.52 | 4.52 | 4.57 | 4.63 | 4.73 |
| TC1900155 | ZNF317         | 57693  | zinc finger protein 317 /// Zinc finger p  | 7.48E-12 | 4 | 5.05 | 4.60 | 4.65 | 4.66 | 4.58 | 4.65 | 4.84 | 4.81 |
| TC1901869 | ZNF329         | 79673  | zinc finger protein 329                    | 0.000115 | 4 | 5.24 | 5.01 | 5.06 | 5.02 | 4.99 | 5.06 | 5.10 | 5.12 |

|           |                          |                                            |                                           |          |      |      |      |      |      |      |      |      |      |
|-----------|--------------------------|--------------------------------------------|-------------------------------------------|----------|------|------|------|------|------|------|------|------|------|
| TC1900254 | ZNF333                   | 84449                                      | zinc finger protein 333                   | 1.35E-18 | 4    | 5.76 | 5.09 | 5.03 | 5.04 | 4.98 | 5.06 | 5.07 | 5.11 |
| TC2000792 | ZNF335                   | 63925                                      | zinc finger protein 335 /// Zinc finger p | 0.000649 | 4    | 5.14 | 4.93 | 4.91 | 4.92 | 4.91 | 4.94 | 4.88 | 4.87 |
| TC1000167 | ZNF33A                   | 7581                                       | zinc finger protein 33A /// Zinc finger p | 1.41E-08 | 4    | 8.07 | 7.36 | 7.39 | 7.34 | 7.28 | 7.56 | 7.72 | 7.80 |
| TC0500745 | ZNF346                   | 23567                                      | zinc finger protein 346 /// Zinc finger p | 2.02E-06 | 4    | 4.41 | 3.92 | 3.91 | 4.13 | 4.08 | 4.08 | 4.18 | 4.17 |
| TC1901777 | ZNF347                   | 84671                                      | zinc finger protein 347 /// Zinc finger p | 0.000249 | 4    | 3.49 | 3.13 | 3.16 | 3.25 | 3.12 | 3.24 | 3.34 | 3.36 |
| TC1901755 | ZNF350                   | 59348                                      | zinc finger protein 350                   | 0.000684 | 4    | 7.00 | 6.71 | 6.61 | 6.68 | 6.54 | 6.79 | 6.90 | 6.91 |
| TC1900483 | ZNF383                   | 163087                                     | zinc finger protein 383                   | 0.000194 | 4    | 4.65 | 4.45 | 4.47 | 4.37 | 4.36 | 4.42 | 4.43 | 4.48 |
| TC1200911 | ZNF384                   | 171017                                     | zinc finger protein 384                   | 3.18E-05 | 4    | 6.27 | 5.93 | 5.90 | 5.96 | 5.97 | 5.99 | 6.09 | 6.07 |
| TC1800139 | ZNF397                   | 84307                                      | zinc finger protein 397 /// Zinc finger p | 0.000355 | 4    | 5.81 | 5.45 | 5.56 | 5.53 | 5.28 | 5.48 | 5.58 | 5.57 |
| TC1901862 | ZNF417                   | 147687                                     | zinc finger protein 417                   | 1.01E-09 | 4    | 5.83 | 5.41 | 5.28 | 5.28 | 5.21 | 5.37 | 5.45 | 5.49 |
| TC1900355 | ZNF431                   | 170959                                     | zinc finger protein 431                   | 0.000173 | 4    | 4.13 | 3.87 | 3.75 | 3.75 | 3.81 | 3.83 | 3.88 | 3.97 |
| TC1600801 | ZNF434                   | 54925                                      | zinc finger protein 434                   | 4.01E-05 | 4    | 4.96 | 4.78 | 4.70 | 4.73 | 4.69 | 4.78 | 4.83 | 4.82 |
| TC1900201 | ZNF439                   | 90594                                      | zinc finger protein 439                   | 1.68E-07 | 4    | 4.79 | 4.25 | 4.24 | 4.31 | 4.25 | 4.27 | 4.50 | 4.56 |
| TC1900200 | ZNF440                   | 126070                                     | zinc finger protein 440                   | 9.69E-08 | 4    | 4.87 | 4.31 | 4.32 | 4.48 | 4.34 | 4.53 | 4.70 | 4.63 |
| TC1000189 | ZNF487                   | 642819                                     | zinc finger protein 487                   | 2.86E-06 | 4    | 5.65 | 4.94 | 4.92 | 4.94 | 4.80 | 5.13 | 5.27 | 5.33 |
| TC1901329 | ZNF506                   | 440515                                     | zinc finger protein 506                   | 1.72E-12 | 4    | 5.00 | 4.76 | 4.71 | 4.57 | 4.54 | 4.76 | 4.85 | 4.93 |
| TC1900935 | ZNF530                   | 348327                                     | zinc finger protein 530                   | 0.000197 | 4    | 3.56 | 3.46 | 3.41 | 3.33 | 3.37 | 3.47 | 3.51 | 3.57 |
| TC1900929 | ZNF547 /// TRAF284306 // | zinc finger protein 547 /// trafficking pr | 0.000746                                  | 4        | 3.95 | 3.89 | 3.80 | 3.86 | 3.79 | 3.85 | 3.79 | 4.04 |      |
| TC1901859 | ZNF552                   | 79818                                      | zinc finger protein 552                   | 0.0002   | 4    | 7.18 | 6.53 | 6.50 | 6.60 | 6.48 | 6.58 | 6.75 | 6.69 |
| TC1900159 | ZNF559 /// ZNF84527 ///  | zinc finger protein 559 /// zinc finger pi | 1.45E-11                                  | 4        | 4.22 | 3.94 | 4.04 | 3.96 | 3.95 | 4.03 | 4.08 | 4.14 |      |
| TC1900480 | ZNF568                   | 374900                                     | zinc finger protein 568                   | 0.000431 | 4    | 4.16 | 3.97 | 4.03 | 3.99 | 3.96 | 3.96 | 4.04 | 4.05 |
| TC1900890 | ZNF581 /// ZNF51545 ///  | zinc finger protein 581 /// zinc finger pi | 8.22E-06                                  | 4        | 5.54 | 5.55 | 5.26 | 5.33 | 5.37 | 5.45 | 5.47 | 5.49 |      |
| TC1900939 | ZNF586                   | ---                                        | Zinc finger protein 586. [Source:Unipro   | 2.41E-08 | 4    | 7.23 | 6.02 | 6.12 | 6.13 | 6.02 | 6.18 | 6.33 | 6.27 |
| TC1900940 | ZNF587 /// Q9J           | 84914                                      | zinc finger protein 587 /// Zinc finger p | 5.17E-16 | 4    | 6.70 | 5.91 | 5.71 | 5.75 | 5.75 | 5.85 | 6.00 | 5.93 |
| TC1901866 | ZNF606                   | 80095                                      | zinc finger protein 606                   | 0.00022  | 4    | 4.82 | 4.61 | 4.63 | 4.60 | 4.58 | 4.64 | 4.69 | 4.71 |
| TC1500404 | ZNF609                   | 23060                                      | zinc finger protein 609                   | 1.19E-12 | 4    | 6.40 | 5.51 | 5.60 | 6.01 | 5.63 | 5.55 | 5.86 | 5.94 |
| TC1901767 | ZNF611 /// Q9J           | 81856                                      | zinc finger protein 611 /// ZNF611 prot   | 9.79E-06 | 4    | 5.44 | 5.24 | 5.17 | 5.15 | 5.12 | 5.20 | 5.19 | 5.26 |
| TC1901336 | ZNF626 /// O7I           | 199777                                     | zinc finger protein 626 /// Zinc finger p | 1.94E-12 | 4    | 4.33 | 3.59 | 3.63 | 3.62 | 3.45 | 3.73 | 3.97 | 4.17 |
| TC0X00173 | ZNF673                   | 55634                                      | zinc finger family member 673 /// Prot    | 2.76E-18 | 4    | 5.02 | 4.56 | 4.48 | 4.49 | 4.52 | 4.68 | 4.82 | 4.85 |
| TC0X00879 | ZNF674                   | 641339                                     | zinc finger family member 674             | 2.76E-20 | 4    | 5.36 | 4.47 | 4.53 | 4.51 | 4.49 | 4.78 | 4.71 | 4.84 |
| TC1900202 | ZNF69 /// Q6ZL           | 7620                                       | zinc finger protein 69 /// CDNA FLJ4154   | 2.38E-08 | 4    | 4.85 | 4.52 | 4.61 | 4.48 | 4.50 | 4.55 | 4.64 | 4.64 |
| TC0103461 | ZNF692                   | 55657                                      | zinc finger protein 692 /// Zinc finger p | 6.61E-11 | 4    | 5.57 | 5.19 | 5.20 | 5.16 | 5.17 | 5.22 | 5.21 | 5.19 |
| TC1900203 | ZNF700                   | 90592                                      | zinc finger protein 700                   | 0.000494 | 4    | 7.28 | 6.75 | 6.73 | 6.67 | 6.57 | 6.69 | 6.90 | 6.79 |
| TC1500615 | ZNF710                   | 374655                                     | zinc finger protein 710                   | 6.11E-06 | 4    | 6.20 | 5.61 | 5.71 | 5.81 | 5.76 | 5.83 | 5.85 | 5.89 |

|            |                                                                     |          |   |      |      |      |      |      |      |      |      |
|------------|---------------------------------------------------------------------|----------|---|------|------|------|------|------|------|------|------|
| TC1900932  | ZNF749 /// ZNF 388567 // zinc finger protein 749 /// zinc finger pr | 6.11E-06 | 4 | 4.01 | 3.86 | 3.83 | 3.82 | 3.75 | 3.81 | 3.86 | 3.91 |
| TC1900204  | ZNF763 729745 // zinc finger protein 763                            | 2.13E-07 | 4 | 5.61 | 4.92 | 5.03 | 4.86 | 4.87 | 4.99 | 5.24 | 5.38 |
| TC0701743  | ZNF767 79970 zinc finger family member 767 /// Prot                 | 5.20E-22 | 4 | 6.29 | 5.12 | 5.13 | 5.25 | 5.30 | 5.32 | 5.39 | 5.40 |
| TC1900938  | ZNF776 /// ZNF 284309 // zinc finger protein 776 /// zinc finger pr | 8.54E-05 | 4 | 6.17 | 5.94 | 5.83 | 5.76 | 5.68 | 5.87 | 5.92 | 5.94 |
| TC1900951  | ZNF8 7554 zinc finger protein 8                                     | 0.000351 | 4 | 5.17 | 4.85 | 4.83 | 4.93 | 4.86 | 4.91 | 5.02 | 4.98 |
| TC1900784  | ZNF808 /// Q6 388558 zinc finger protein 808                        | 6.37E-09 | 4 | 5.37 | 4.80 | 4.79 | 4.82 | 4.73 | 4.92 | 5.11 | 5.10 |
| TC1901766  | ZNF83 55769 zinc finger protein 83 /// Zinc finger pr               | 5.05E-14 | 4 | 4.75 | 4.19 | 4.20 | 4.21 | 4.20 | 4.19 | 4.28 | 4.27 |
| TC1900352  | ZNF85 7639 zinc finger protein 85 /// Zinc finger pr                | 2.23E-09 | 4 | 4.60 | 4.26 | 4.24 | 4.28 | 4.22 | 4.35 | 4.45 | 4.57 |
| TC0200358  | ZNHIT4 /// WB 83444 /// zinc finger, HIT type 4 /// WW domain       | 2.53E-05 | 4 | 5.63 | 5.34 | 5.33 | 5.39 | 5.43 | 5.36 | 5.44 | 5.40 |
| TC1000671  | ZRANB1 54764 zinc finger, RAN-binding domain contai                 | 0.000847 | 4 | 7.60 | 7.55 | 7.19 | 7.26 | 7.24 | 7.44 | 7.45 | 7.43 |
| TC0X00063  | ZRSR2 8233 zinc finger (CCCH type), RNA-binding m                   | 2.05E-07 | 4 | 7.97 | 7.50 | 7.60 | 7.59 | 7.46 | 7.65 | 7.84 | 7.84 |
| TC1901867  | ZSCAN18 65982 zinc finger and SCAN domain containi                  | 9.87E-05 | 4 | 5.05 | 4.87 | 4.86 | 4.82 | 4.82 | 4.84 | 4.81 | 4.86 |
| TC0301521  | ZXDC 79364 ZXD family zinc finger C                                 | 1.05E-07 | 4 | 5.92 | 5.45 | 5.45 | 5.50 | 5.53 | 5.57 | 5.56 | 5.61 |
| TC1700929  | ZZEF1 23140 zinc finger, ZZ-type with EF-hand doma                  | 1.23E-07 | 4 | 6.77 | 6.19 | 5.95 | 6.05 | 5.98 | 6.06 | 6.15 | 6.09 |
| TC2200786  | ---                                                                 | 8.40E-34 | 4 | 6.25 | 5.24 | 5.18 | 5.15 | 5.16 | 5.23 | 5.29 | 5.26 |
| TC1001251  | ---                                                                 | 2.05E-11 | 4 | 8.16 | 7.70 | 7.49 | 7.38 | 7.46 | 7.63 | 7.63 | 7.61 |
| TC0700540  | ---                                                                 | 9.62E-09 | 4 | 5.43 | 5.13 | 5.11 | 5.15 | 5.23 | 5.26 | 5.24 | 5.25 |
| TC1400737  | ---                                                                 | 4.09E-06 | 4 | 5.12 | 4.96 | 4.89 | 4.92 | 4.93 | 5.00 | 4.97 | 4.99 |
| TC0101128  | ---                                                                 | 1.83E-05 | 4 | 4.77 | 4.58 | 4.56 | 4.52 | 4.56 | 4.61 | 4.61 | 4.60 |
| TC0400393  | ---                                                                 | 8.71E-32 | 4 | 7.21 | 5.11 | 4.87 | 4.96 | 4.93 | 5.04 | 5.31 | 5.18 |
| TC1701440  | ---                                                                 | 1.26E-31 | 4 | 6.29 | 4.29 | 4.17 | 4.26 | 4.31 | 4.40 | 4.34 | 4.38 |
| TC0200286  | ---                                                                 | 3.09E-30 | 4 | 9.25 | 7.01 | 6.50 | 6.52 | 6.52 | 6.75 | 7.01 | 7.30 |
| TC0201695  | ---                                                                 | 8.58E-30 | 4 | 6.55 | 5.13 | 5.20 | 5.39 | 5.33 | 5.56 | 5.64 | 5.75 |
| TC0103192  | ---                                                                 | 1.01E-28 | 4 | 9.10 | 5.72 | 5.56 | 5.96 | 5.83 | 6.44 | 6.67 | 6.81 |
| TC01r00007 | ---                                                                 | 1.72E-28 | 4 | 5.90 | 5.02 | 5.05 | 5.09 | 5.11 | 5.18 | 5.17 | 5.11 |
| TC2100418  | ---                                                                 | 2.80E-25 | 4 | 7.44 | 5.09 | 5.07 | 5.28 | 5.23 | 5.35 | 5.32 | 5.45 |
| TC0700672  | ---                                                                 | 2.45E-23 | 4 | 8.96 | 7.97 | 7.75 | 7.87 | 7.85 | 7.92 | 7.95 | 7.96 |
| TC2200749  | ---                                                                 | 2.55E-23 | 4 | 6.90 | 5.77 | 5.55 | 5.68 | 5.77 | 5.96 | 6.11 | 6.15 |
| TC0301453  | ---                                                                 | 3.01E-23 | 4 | 6.94 | 4.88 | 4.65 | 4.84 | 4.91 | 5.27 | 5.52 | 5.59 |
| TC0600094  | ---                                                                 | 6.19E-23 | 4 | 6.69 | 3.40 | 3.33 | 3.81 | 3.65 | 4.17 | 4.40 | 4.44 |
| TC1500911  | ---                                                                 | 2.99E-22 | 4 | 5.57 | 4.45 | 4.39 | 4.60 | 4.55 | 4.73 | 4.80 | 4.77 |
| TC1000201  | ---                                                                 | 9.94E-22 | 4 | 6.19 | 5.04 | 4.94 | 5.16 | 5.16 | 5.34 | 5.54 | 5.57 |
| TC0103068  | ---                                                                 | 3.62E-21 | 4 | 9.35 | 8.01 | 7.69 | 7.72 | 7.54 | 7.92 | 8.00 | 8.10 |
| TC0101006  | ---                                                                 | 5.31E-21 | 4 | 5.77 | 4.22 | 3.79 | 3.96 | 3.88 | 4.41 | 4.71 | 5.14 |



|           |     |          |   |       |       |       |      |       |       |       |       |
|-----------|-----|----------|---|-------|-------|-------|------|-------|-------|-------|-------|
| TC0102327 | --- | 1.14E-20 | 4 | 4.55  | 3.13  | 3.15  | 3.28 | 3.34  | 3.61  | 3.57  | 3.67  |
| TC0500338 | --- | 1.16E-20 | 4 | 9.14  | 5.78  | 5.52  | 6.16 | 6.26  | 6.85  | 6.87  | 7.00  |
| TC1001278 | --- | 2.67E-20 | 4 | 6.48  | 4.80  | 3.99  | 4.13 | 4.35  | 4.76  | 5.14  | 5.22  |
| TC0501141 | --- | 7.01E-20 | 4 | 7.80  | 5.41  | 5.11  | 5.94 | 5.94  | 6.56  | 6.40  | 6.67  |
| TC0Y00086 | --- | 8.50E-20 | 4 | 7.85  | 5.83  | 5.20  | 5.24 | 5.58  | 6.06  | 6.07  | 6.44  |
| TC0501371 | --- | 9.95E-20 | 4 | 6.47  | 5.33  | 4.96  | 4.92 | 4.77  | 5.03  | 4.85  | 4.96  |
| TC1600330 | --- | 1.11E-19 | 4 | 6.17  | 4.58  | 4.20  | 4.40 | 4.52  | 4.89  | 4.93  | 5.14  |
| TC1901272 | --- | 1.32E-19 | 4 | 7.51  | 5.25  | 5.20  | 5.56 | 5.31  | 5.65  | 5.51  | 5.65  |
| TC0201487 | --- | 2.59E-19 | 4 | 7.10  | 5.32  | 5.24  | 5.77 | 5.60  | 5.85  | 6.01  | 6.04  |
| TC1700891 | --- | 2.60E-19 | 4 | 8.01  | 5.50  | 5.21  | 5.49 | 5.38  | 5.88  | 5.80  | 6.23  |
| TC1100545 | --- | 4.72E-19 | 4 | 11.05 | 10.16 | 10.10 | 9.99 | 10.01 | 10.16 | 10.17 | 10.24 |
| TC0700967 | --- | 9.25E-19 | 4 | 6.35  | 4.87  | 4.81  | 4.93 | 4.76  | 5.00  | 5.27  | 5.24  |
| TC0301588 | --- | 4.01E-18 | 4 | 4.10  | 1.99  | 1.82  | 2.22 | 2.25  | 2.19  | 2.24  | 2.28  |
| TC0103128 | --- | 4.15E-18 | 4 | 8.03  | 5.60  | 4.75  | 4.63 | 5.19  | 5.79  | 5.85  | 5.97  |
| TC0Y00100 | --- | 9.27E-18 | 4 | 7.40  | 5.12  | 4.22  | 4.33 | 4.49  | 5.16  | 5.54  | 5.30  |
| TC0200873 | --- | 1.21E-17 | 4 | 5.12  | 4.04  | 4.08  | 4.40 | 4.41  | 4.50  | 4.58  | 4.54  |
| TC1901698 | --- | 1.61E-17 | 4 | 6.37  | 5.54  | 5.56  | 5.67 | 5.69  | 5.67  | 5.76  | 5.73  |
| TC0300607 | --- | 2.19E-17 | 4 | 7.84  | 5.22  | 4.57  | 4.45 | 4.75  | 5.36  | 5.28  | 5.51  |
| TC1800011 | --- | 2.49E-17 | 4 | 9.92  | 8.97  | 8.73  | 8.97 | 8.94  | 9.35  | 9.41  | 9.56  |
| TC0701640 | --- | 2.81E-17 | 4 | 7.35  | 6.24  | 5.94  | 6.07 | 6.10  | 6.34  | 6.34  | 6.46  |
| TC1000936 | --- | 3.26E-17 | 4 | 7.12  | 5.11  | 5.10  | 5.30 | 5.41  | 5.93  | 5.98  | 6.19  |
| TC1400428 | --- | 3.61E-17 | 4 | 6.69  | 5.02  | 4.96  | 5.07 | 5.08  | 5.22  | 5.43  | 5.56  |
| TC0700598 | --- | 5.23E-17 | 4 | 7.23  | 5.15  | 5.12  | 5.23 | 5.17  | 5.23  | 5.28  | 5.34  |
| TC0400392 | --- | 1.15E-16 | 4 | 6.75  | 4.71  | 4.46  | 4.36 | 4.32  | 4.64  | 5.06  | 4.84  |
| TC1601004 | --- | 1.26E-16 | 4 | 7.61  | 6.42  | 6.36  | 6.21 | 6.36  | 6.38  | 6.49  | 6.38  |
| TC1900351 | --- | 1.31E-16 | 4 | 6.18  | 5.12  | 4.87  | 4.96 | 4.90  | 5.19  | 5.43  | 5.61  |
| TC1800014 | --- | 1.70E-16 | 4 | 5.88  | 3.47  | 3.57  | 3.56 | 3.58  | 4.05  | 4.38  | 4.41  |
| TC0102545 | --- | 1.96E-16 | 4 | 9.96  | 8.29  | 8.11  | 8.26 | 8.16  | 8.33  | 8.48  | 8.38  |
| TC0201598 | --- | 2.79E-16 | 4 | 5.74  | 5.28  | 5.12  | 5.18 | 5.27  | 5.37  | 5.35  | 5.39  |
| TC1600333 | --- | 4.15E-16 | 4 | 10.59 | 9.10  | 8.96  | 8.93 | 9.08  | 9.00  | 9.22  | 9.11  |
| TC2000605 | --- | 4.89E-16 | 4 | 3.94  | 3.39  | 3.40  | 3.36 | 3.35  | 3.35  | 3.31  | 3.44  |
| TC0500337 | --- | 5.23E-16 | 4 | 4.84  | 2.30  | 2.37  | 2.56 | 2.74  | 2.79  | 3.44  | 3.08  |
| TC0800694 | --- | 8.90E-16 | 4 | 5.40  | 3.89  | 3.92  | 3.95 | 3.86  | 4.14  | 4.25  | 4.35  |
| TC1500441 | --- | 1.50E-15 | 4 | 4.36  | 2.91  | 2.92  | 2.89 | 2.80  | 2.85  | 3.02  | 3.13  |

|           |        |          |   |       |      |      |      |      |       |       |       |
|-----------|--------|----------|---|-------|------|------|------|------|-------|-------|-------|
| TC0701367 | ---    | 1.65E-15 | 4 | 6.86  | 5.38 | 5.58 | 5.57 | 5.63 | 5.87  | 6.02  | 5.95  |
| TC1400445 | ---    | 2.83E-15 | 4 | 4.43  | 3.29 | 3.01 | 3.24 | 3.32 | 3.47  | 3.57  | 3.62  |
| TC1400431 | ---    | 3.87E-15 | 4 | 7.77  | 5.37 | 5.57 | 5.44 | 5.59 | 5.92  | 6.45  | 6.47  |
| TC0801040 | ---    | 4.22E-15 | 4 | 10.00 | 9.02 | 8.78 | 8.88 | 8.89 | 8.95  | 9.00  | 8.86  |
| TC0700711 | ---    | 5.18E-15 | 4 | 7.33  | 6.39 | 6.07 | 6.07 | 6.09 | 6.33  | 6.27  | 6.33  |
| TC1600112 | ---    | 5.35E-15 | 4 | 5.46  | 3.59 | 3.45 | 3.37 | 3.50 | 3.86  | 4.42  | 4.35  |
| TC0Y00178 | ---    | 5.74E-15 | 4 | 6.96  | 5.02 | 4.29 | 4.09 | 4.29 | 4.91  | 5.10  | 5.18  |
| TC0202114 | ---    | 6.60E-15 | 4 | 8.94  | 7.65 | 7.46 | 7.65 | 7.55 | 7.85  | 7.95  | 7.95  |
| TC0300350 | ---    | 6.71E-15 | 4 | 7.55  | 6.25 | 5.91 | 6.08 | 5.95 | 6.17  | 6.37  | 6.35  |
| TC0500198 | ---    | 6.94E-15 | 4 | 9.65  | 8.95 | 9.05 | 8.98 | 9.10 | 9.14  | 9.07  | 9.08  |
| TC0102719 | ---    | 9.77E-15 | 4 | 6.79  | 6.02 | 5.89 | 5.94 | 6.05 | 6.08  | 5.93  | 6.03  |
| TC0300245 | ---    | 1.30E-14 | 4 | 5.68  | 4.61 | 4.56 | 4.69 | 4.63 | 4.73  | 4.76  | 4.87  |
| TC1701729 | ---    | 1.33E-14 | 4 | 9.20  | 7.09 | 6.40 | 6.83 | 6.51 | 7.12  | 7.23  | 7.20  |
| TC0301774 | ---    | 1.47E-14 | 4 | 6.40  | 5.78 | 5.77 | 5.73 | 5.76 | 5.79  | 5.78  | 5.81  |
| TC0601520 | ---    | 2.64E-14 | 4 | 10.87 | 9.98 | 9.82 | 9.94 | 9.96 | 10.18 | 10.03 | 10.22 |
| TC1700890 | ---    | 3.54E-14 | 4 | 6.33  | 4.34 | 4.11 | 4.24 | 4.29 | 4.46  | 4.56  | 4.64  |
| TC1800013 | ---    | 6.02E-14 | 4 | 7.11  | 5.16 | 4.96 | 4.99 | 4.98 | 5.70  | 5.68  | 5.96  |
| TC0601412 | ---    | 6.75E-14 | 4 | 5.64  | 4.34 | 4.32 | 4.35 | 4.34 | 4.50  | 4.66  | 4.70  |
| TC0Y00195 | ---    | 8.69E-14 | 4 | 6.06  | 4.47 | 4.02 | 4.19 | 4.33 | 4.63  | 4.69  | 4.65  |
| TC0200435 | ---    | 1.40E-13 | 4 | 5.66  | 4.46 | 4.56 | 4.67 | 4.66 | 4.84  | 5.01  | 4.98  |
| TC1100566 | ---    | 1.64E-13 | 4 | 6.48  | 4.81 | 4.59 | 4.42 | 4.49 | 4.49  | 5.00  | 4.81  |
| TC0601620 | ---    | 1.68E-13 | 4 | 8.75  | 6.04 | 5.19 | 4.98 | 4.80 | 6.17  | 6.67  | 7.31  |
| TC1201346 | ---    | 1.78E-13 | 4 | 8.14  | 6.66 | 6.25 | 6.26 | 6.09 | 6.48  | 6.42  | 6.54  |
| TC1001050 | ---    | 1.89E-13 | 4 | 4.72  | 4.11 | 4.05 | 4.33 | 4.17 | 4.45  | 4.39  | 4.47  |
| TC0600390 | ---    | 2.56E-13 | 4 | 6.80  | 4.55 | 4.29 | 4.67 | 4.66 | 4.98  | 5.13  | 4.86  |
| TC0701310 | 730307 | 2.65E-13 | 4 | 6.82  | 5.48 | 5.47 | 5.53 | 5.75 | 5.72  | 5.97  | 6.10  |
| TC0100977 | ---    | 3.10E-13 | 4 | 8.40  | 7.72 | 7.54 | 7.53 | 7.55 | 7.67  | 7.80  | 7.76  |
| TC0901397 | ---    | 3.43E-13 | 4 | 7.09  | 5.68 | 5.15 | 5.38 | 5.17 | 5.27  | 5.13  | 5.45  |
| TC0501482 | ---    | 3.68E-13 | 4 | 5.41  | 4.48 | 4.20 | 4.32 | 4.23 | 4.39  | 4.19  | 4.26  |
| TC0400566 | ---    | 3.69E-13 | 4 | 4.54  | 3.47 | 3.33 | 3.35 | 3.23 | 3.52  | 3.28  | 3.62  |
| TC0700582 | ---    | 4.20E-13 | 4 | 5.87  | 4.84 | 4.86 | 5.09 | 5.18 | 5.24  | 5.39  | 5.23  |
| TC1000957 | ---    | 5.44E-13 | 4 | 5.65  | 4.98 | 5.02 | 5.00 | 4.98 | 5.04  | 5.16  | 5.21  |
| TC2000548 | ---    | 6.41E-13 | 4 | 3.25  | 2.58 | 2.43 | 2.47 | 2.51 | 2.49  | 2.57  | 2.55  |
| TC1600984 | ---    | 6.88E-13 | 4 | 7.40  | 6.36 | 6.26 | 6.13 | 6.27 | 6.31  | 6.46  | 6.36  |

|           |        |          |   |       |      |      |      |      |      |      |      |
|-----------|--------|----------|---|-------|------|------|------|------|------|------|------|
| TC0700131 | ---    | 7.28E-13 | 4 | 6.56  | 5.06 | 5.08 | 5.40 | 5.35 | 5.74 | 5.88 | 6.00 |
| TC1601003 | ---    | 9.31E-13 | 4 | 7.24  | 6.10 | 5.87 | 5.82 | 5.92 | 5.91 | 6.10 | 5.89 |
| TC0700673 | ---    | 9.53E-13 | 4 | 8.43  | 7.54 | 7.55 | 7.42 | 7.48 | 7.58 | 7.51 | 7.49 |
| TC1601250 | ---    | 1.18E-12 | 4 | 5.71  | 4.92 | 4.88 | 5.00 | 4.97 | 5.07 | 5.02 | 5.12 |
| TC1701571 | ---    | 1.23E-12 | 4 | 7.44  | 5.84 | 5.59 | 5.94 | 6.15 | 6.07 | 6.33 | 6.17 |
| TC0101444 | ---    | 1.25E-12 | 4 | 5.92  | 4.55 | 4.56 | 4.84 | 4.79 | 4.84 | 5.01 | 4.93 |
| TC0701165 | ---    | 1.55E-12 | 4 | 6.83  | 5.84 | 5.65 | 5.95 | 5.93 | 5.88 | 6.01 | 5.89 |
| TC0100968 | ---    | 1.83E-12 | 4 | 6.75  | 5.57 | 5.59 | 5.76 | 5.79 | 6.05 | 6.33 | 6.19 |
| TC0700862 | ---    | 2.64E-12 | 4 | 6.56  | 4.69 | 4.51 | 5.05 | 4.99 | 5.01 | 5.33 | 5.27 |
| TC1100667 | ---    | 3.01E-12 | 4 | 8.04  | 6.24 | 6.41 | 6.70 | 6.69 | 6.97 | 6.70 | 6.90 |
| TC1600217 | ---    | 3.17E-12 | 4 | 9.05  | 7.65 | 7.38 | 7.37 | 7.53 | 7.52 | 7.94 | 7.73 |
| TC1000190 | ---    | 4.54E-12 | 4 | 7.71  | 6.79 | 6.75 | 6.54 | 6.53 | 6.78 | 6.92 | 7.01 |
| TC0100707 | ---    | 5.37E-12 | 4 | 6.11  | 4.94 | 4.79 | 4.93 | 4.95 | 5.32 | 5.63 | 5.58 |
| TC0500797 | ---    | 5.38E-12 | 4 | 10.30 | 9.32 | 9.19 | 9.01 | 8.96 | 9.01 | 9.09 | 8.89 |
| TC1900252 | ---    | 5.82E-12 | 4 | 7.10  | 5.65 | 5.54 | 5.72 | 5.79 | 6.08 | 5.97 | 6.02 |
| TC0601380 | ---    | 9.34E-12 | 4 | 7.66  | 6.20 | 6.17 | 6.33 | 6.28 | 6.87 | 6.78 | 7.06 |
| TC0300608 | ---    | 1.44E-11 | 4 | 3.87  | 2.43 | 2.23 | 2.16 | 2.03 | 2.40 | 2.38 | 2.54 |
| TC1600310 | ---    | 1.47E-11 | 4 | 9.60  | 8.36 | 8.14 | 8.11 | 8.29 | 8.14 | 8.39 | 8.30 |
| TCOX01392 | ---    | 1.48E-11 | 4 | 7.74  | 6.45 | 6.41 | 6.53 | 6.50 | 6.85 | 6.94 | 6.83 |
| TC0801221 | ---    | 1.84E-11 | 4 | 5.89  | 4.73 | 3.93 | 4.12 | 3.92 | 4.31 | 4.44 | 4.60 |
| TCOX00174 | ---    | 1.93E-11 | 4 | 4.84  | 3.26 | 3.29 | 3.38 | 3.19 | 3.55 | 3.68 | 3.63 |
| TC1701400 | ---    | 2.22E-11 | 4 | 6.10  | 5.43 | 5.49 | 5.51 | 5.51 | 5.54 | 5.65 | 5.67 |
| TC1201521 | ---    | 2.23E-11 | 4 | 10.09 | 9.23 | 9.16 | 9.19 | 9.28 | 9.33 | 9.25 | 9.39 |
| TC0700675 | ---    | 2.65E-11 | 4 | 9.42  | 8.63 | 8.60 | 8.47 | 8.50 | 8.57 | 8.62 | 8.50 |
| TC1500336 | ---    | 2.89E-11 | 4 | 5.29  | 3.92 | 3.94 | 4.29 | 4.03 | 4.28 | 4.19 | 4.24 |
| TC1701751 | ---    | 2.91E-11 | 4 | 7.84  | 6.74 | 6.47 | 6.61 | 6.60 | 6.87 | 7.07 | 7.04 |
| TC1000905 | ---    | 2.98E-11 | 4 | 5.42  | 4.93 | 4.93 | 4.91 | 4.91 | 4.94 | 5.00 | 4.97 |
| TC1100542 | ---    | 3.10E-11 | 4 | 8.42  | 6.80 | 6.44 | 6.34 | 6.62 | 6.68 | 6.57 | 6.59 |
| TC0701365 | ---    | 3.68E-11 | 4 | 6.07  | 5.17 | 5.17 | 5.19 | 5.31 | 5.26 | 5.44 | 5.30 |
| TC1600243 | ---    | 3.69E-11 | 4 | 9.51  | 8.24 | 8.04 | 7.96 | 8.11 | 8.01 | 8.34 | 8.22 |
| TC1600204 | ---    | 4.92E-11 | 4 | 8.10  | 6.97 | 6.80 | 6.70 | 6.88 | 6.77 | 7.08 | 6.90 |
| TC1700580 | 731443 | 5.53E-11 | 4 | 3.95  | 3.06 | 3.08 | 3.14 | 3.09 | 3.23 | 3.21 | 3.29 |
| TC0202037 | ---    | 5.60E-11 | 4 | 8.84  | 7.30 | 6.92 | 7.15 | 7.34 | 7.55 | 7.51 | 7.56 |
| TC1101437 | 730916 | 9.19E-11 | 4 | 9.05  | 7.45 | 6.54 | 6.98 | 6.39 | 6.78 | 6.86 | 7.54 |

|            |     |          |   |       |       |       |       |       |       |       |       |
|------------|-----|----------|---|-------|-------|-------|-------|-------|-------|-------|-------|
| TC0900337  | --- | 9.66E-11 | 4 | 6.07  | 4.46  | 4.61  | 4.46  | 4.59  | 5.09  | 5.40  | 5.40  |
| TC0700219  | --- | 1.09E-10 | 4 | 5.95  | 5.32  | 5.26  | 5.18  | 5.17  | 5.17  | 5.19  | 5.18  |
| TC0301781  | --- | 1.15E-10 | 4 | 6.44  | 5.72  | 5.67  | 5.69  | 5.65  | 5.72  | 5.76  | 5.80  |
| TC1800091  | --- | 1.27E-10 | 4 | 6.96  | 5.59  | 5.59  | 5.66  | 5.76  | 6.15  | 6.48  | 6.43  |
| TC1101164  | --- | 1.46E-10 | 4 | 6.52  | 5.57  | 5.39  | 5.28  | 4.83  | 5.41  | 5.95  | 6.20  |
| TC1600177  | --- | 1.54E-10 | 4 | 5.24  | 4.23  | 4.14  | 4.23  | 4.16  | 4.41  | 4.09  | 4.23  |
| TC1500744  | --- | 1.64E-10 | 4 | 11.14 | 10.40 | 10.50 | 10.44 | 10.46 | 10.53 | 10.43 | 10.49 |
| TC0301643  | --- | 1.80E-10 | 4 | 3.52  | 2.19  | 2.23  | 2.35  | 2.13  | 2.47  | 2.54  | 2.57  |
| TC0201725  | --- | 2.04E-10 | 4 | 8.49  | 7.86  | 7.67  | 7.68  | 7.65  | 7.81  | 7.92  | 7.93  |
| TC1000062  | --- | 2.21E-10 | 4 | 5.15  | 3.37  | 2.70  | 3.04  | 2.93  | 3.59  | 3.35  | 3.62  |
| TC0400645  | --- | 2.30E-10 | 4 | 3.68  | 2.50  | 2.52  | 2.57  | 2.49  | 2.63  | 2.89  | 2.91  |
| TC1701502  | --- | 2.43E-10 | 4 | 4.82  | 3.45  | 3.46  | 3.40  | 3.35  | 3.53  | 3.86  | 3.81  |
| TC0X00566  | --- | 2.73E-10 | 4 | 10.53 | 9.95  | 9.88  | 9.78  | 9.86  | 9.93  | 9.99  | 9.90  |
| TC1100786  | --- | 3.07E-10 | 4 | 3.66  | 2.35  | 2.38  | 2.39  | 2.45  | 2.58  | 2.66  | 2.76  |
| TC0400606  | --- | 3.40E-10 | 4 | 7.86  | 6.24  | 6.17  | 6.34  | 6.17  | 6.79  | 6.74  | 6.82  |
| TC1900253  | --- | 4.31E-10 | 4 | 5.39  | 4.40  | 4.12  | 4.30  | 4.37  | 4.33  | 4.64  | 4.54  |
| TC17r00035 | --- | 4.55E-10 | 4 | 6.67  | 5.96  | 5.98  | 6.00  | 6.05  | 6.12  | 6.27  | 6.18  |
| TC1601013  | --- | 5.75E-10 | 4 | 7.92  | 6.18  | 6.70  | 6.53  | 6.63  | 6.79  | 6.89  | 6.92  |
| TC0601086  | --- | 5.89E-10 | 4 | 5.68  | 5.11  | 5.06  | 5.01  | 5.07  | 5.32  | 5.36  | 5.45  |
| TC1700963  | --- | 6.09E-10 | 4 | 5.13  | 4.29  | 4.17  | 4.18  | 4.21  | 4.47  | 4.32  | 4.47  |
| TC0600965  | --- | 6.57E-10 | 4 | 3.84  | 2.13  | 2.15  | 2.18  | 2.11  | 2.12  | 2.30  | 2.26  |
| TC1201338  | --- | 6.82E-10 | 4 | 3.55  | 2.83  | 2.76  | 2.85  | 2.74  | 2.95  | 3.08  | 3.06  |
| TC1701730  | --- | 7.45E-10 | 4 | 6.07  | 5.00  | 4.57  | 4.89  | 4.86  | 4.94  | 4.87  | 5.00  |
| TC1401012  | --- | 7.57E-10 | 4 | 6.76  | 5.66  | 5.15  | 4.67  | 4.94  | 5.49  | 5.36  | 5.96  |
| TC1600937  | --- | 8.06E-10 | 4 | 9.13  | 7.86  | 7.58  | 7.54  | 7.75  | 7.55  | 7.95  | 7.78  |
| TC0601580  | --- | 9.06E-10 | 4 | 3.62  | 3.24  | 3.12  | 3.23  | 3.20  | 3.39  | 3.39  | 3.51  |
| TC0202404  | --- | 9.23E-10 | 4 | 10.61 | 10.01 | 10.15 | 9.97  | 10.07 | 10.11 | 10.04 | 10.02 |
| TC0401446  | --- | 9.65E-10 | 4 | 4.86  | 3.98  | 3.98  | 4.20  | 4.18  | 4.28  | 4.30  | 4.18  |
| TC0600637  | --- | 1.00E-09 | 4 | 5.43  | 3.38  | 3.53  | 3.32  | 3.12  | 3.66  | 3.59  | 3.68  |
| TC1900660  | --- | 1.09E-09 | 4 | 6.24  | 4.13  | 4.21  | 4.56  | 4.11  | 4.69  | 4.94  | 4.55  |
| TC1600880  | --- | 1.29E-09 | 4 | 8.42  | 7.08  | 6.86  | 6.81  | 6.99  | 6.88  | 7.34  | 7.17  |
| TC0600331  | --- | 1.33E-09 | 4 | 5.27  | 4.88  | 4.24  | 4.09  | 4.15  | 4.32  | 4.35  | 4.27  |
| TC21r00001 | --- | 1.50E-09 | 4 | 5.92  | 5.55  | 5.48  | 5.40  | 5.33  | 5.56  | 5.45  | 5.49  |
| TC0601225  | --- | 1.71E-09 | 4 | 8.90  | 7.76  | 7.41  | 7.52  | 7.45  | 7.68  | 7.57  | 7.56  |

|           |     |          |   |       |       |       |       |       |       |       |       |
|-----------|-----|----------|---|-------|-------|-------|-------|-------|-------|-------|-------|
| TC1600979 | --- | 2.04E-09 | 4 | 4.29  | 3.61  | 3.53  | 3.40  | 3.47  | 3.49  | 3.58  | 3.48  |
| TC1600858 | --- | 2.05E-09 | 4 | 8.59  | 8.32  | 7.71  | 7.48  | 7.35  | 7.90  | 7.89  | 7.89  |
| TC1901860 | --- | 2.11E-09 | 4 | 5.32  | 4.66  | 4.69  | 4.68  | 4.67  | 4.70  | 4.84  | 4.83  |
| TC1501111 | --- | 2.29E-09 | 4 | 5.83  | 4.64  | 4.55  | 5.09  | 4.86  | 5.09  | 4.98  | 5.10  |
| TC1200863 | --- | 2.33E-09 | 4 | 4.86  | 3.18  | 3.37  | 3.28  | 3.18  | 3.57  | 3.21  | 3.32  |
| TC1001185 | --- | 2.45E-09 | 4 | 4.21  | 3.83  | 3.72  | 3.65  | 3.67  | 3.72  | 3.69  | 3.71  |
| TC1600978 | --- | 2.52E-09 | 4 | 8.82  | 8.08  | 7.89  | 7.84  | 8.02  | 7.91  | 8.09  | 7.95  |
| TC1600411 | --- | 3.37E-09 | 4 | 6.05  | 5.23  | 5.07  | 5.09  | 5.10  | 5.29  | 5.48  | 5.53  |
| TC0101445 | --- | 3.39E-09 | 4 | 4.51  | 3.76  | 3.77  | 3.86  | 3.82  | 3.73  | 3.89  | 3.74  |
| TC1201295 | --- | 3.41E-09 | 4 | 7.46  | 5.93  | 5.66  | 5.80  | 5.79  | 6.35  | 6.87  | 6.84  |
| TC1900953 | --- | 3.46E-09 | 4 | 3.62  | 2.43  | 2.32  | 2.48  | 2.43  | 2.68  | 2.67  | 2.91  |
| TC0601526 | --- | 3.49E-09 | 4 | 6.39  | 4.61  | 4.50  | 4.62  | 4.37  | 4.59  | 4.79  | 4.78  |
| TC0100090 | --- | 4.27E-09 | 4 | 5.10  | 4.28  | 4.09  | 4.03  | 4.13  | 4.35  | 4.59  | 4.49  |
| TC0301573 | --- | 4.43E-09 | 4 | 4.39  | 3.67  | 3.15  | 3.29  | 3.29  | 3.26  | 3.41  | 3.70  |
| TC0601411 | --- | 4.75E-09 | 4 | 5.09  | 3.91  | 3.88  | 3.93  | 3.74  | 3.96  | 4.27  | 4.18  |
| TC2000760 | --- | 5.32E-09 | 4 | 11.99 | 11.75 | 11.73 | 11.68 | 11.69 | 11.69 | 11.62 | 11.70 |
| TC1400107 | --- | 5.72E-09 | 4 | 5.91  | 5.51  | 5.51  | 5.48  | 5.55  | 5.50  | 5.51  | 5.40  |
| TC2000229 | --- | 6.58E-09 | 4 | 5.06  | 3.93  | 3.29  | 3.79  | 3.63  | 4.09  | 4.40  | 4.43  |
| TC1600289 | --- | 6.75E-09 | 4 | 8.45  | 7.53  | 7.14  | 7.01  | 6.94  | 7.33  | 7.03  | 7.18  |
| TC1600304 | --- | 6.97E-09 | 4 | 5.37  | 4.52  | 4.40  | 4.35  | 4.52  | 4.37  | 4.61  | 4.50  |
| TC0102698 | --- | 7.29E-09 | 4 | 7.29  | 5.63  | 5.70  | 5.69  | 5.95  | 6.06  | 6.29  | 6.20  |
| TC0103269 | --- | 7.44E-09 | 4 | 8.45  | 7.92  | 7.92  | 7.74  | 7.78  | 7.80  | 7.77  | 7.69  |
| TC1701039 | --- | 8.72E-09 | 4 | 9.55  | 7.89  | 7.81  | 7.78  | 8.21  | 8.45  | 8.33  | 8.61  |
| TC0102045 | --- | 9.90E-09 | 4 | 5.35  | 3.28  | 3.65  | 4.22  | 4.11  | 4.02  | 4.16  | 4.29  |
| TC0101443 | --- | 9.93E-09 | 4 | 6.37  | 5.14  | 5.07  | 5.44  | 5.36  | 5.50  | 5.45  | 5.62  |
| TC1001098 | --- | 1.01E-08 | 4 | 12.06 | 11.62 | 11.67 | 11.61 | 11.62 | 11.66 | 11.69 | 11.65 |
| TC0401445 | --- | 1.04E-08 | 4 | 5.42  | 4.20  | 4.04  | 4.40  | 4.31  | 4.34  | 4.58  | 4.20  |
| TC0300204 | --- | 1.06E-08 | 4 | 6.45  | 5.41  | 5.26  | 5.19  | 5.14  | 5.28  | 5.27  | 5.33  |
| TC0800657 | --- | 1.10E-08 | 4 | 4.39  | 3.92  | 3.81  | 3.84  | 3.92  | 3.93  | 4.05  | 4.10  |
| TC0102972 | --- | 1.15E-08 | 4 | 3.76  | 3.35  | 3.21  | 3.26  | 3.22  | 3.27  | 3.28  | 3.31  |
| TC0901253 | --- | 1.42E-08 | 4 | 7.57  | 6.36  | 6.20  | 6.09  | 6.18  | 6.42  | 6.25  | 6.21  |
| TC1201209 | --- | 1.55E-08 | 4 | 6.09  | 4.74  | 4.62  | 4.63  | 4.68  | 5.15  | 5.40  | 5.10  |
| TC1701190 | --- | 1.62E-08 | 4 | 3.93  | 3.19  | 3.04  | 2.74  | 2.93  | 3.00  | 3.02  | 3.01  |
| TC1000667 | --- | 1.66E-08 | 4 | 4.12  | 3.38  | 3.36  | 3.39  | 3.33  | 3.47  | 3.39  | 3.51  |

|           |     |          |   |      |      |      |      |      |      |      |      |
|-----------|-----|----------|---|------|------|------|------|------|------|------|------|
| TC0800387 | --- | 1.77E-08 | 4 | 3.20 | 2.69 | 2.63 | 2.65 | 2.62 | 2.60 | 2.60 | 2.62 |
| TC1400341 | --- | 1.78E-08 | 4 | 3.97 | 2.98 | 2.66 | 2.68 | 2.62 | 2.68 | 2.87 | 2.86 |
| TC0103377 | --- | 1.83E-08 | 4 | 7.66 | 6.66 | 6.64 | 6.69 | 6.65 | 6.89 | 6.80 | 6.89 |
| TC0300575 | --- | 1.94E-08 | 4 | 6.72 | 5.99 | 5.86 | 6.04 | 5.91 | 6.19 | 6.24 | 6.30 |
| TC0701372 | --- | 1.95E-08 | 4 | 6.35 | 5.66 | 5.70 | 5.50 | 5.58 | 5.93 | 6.09 | 6.08 |
| TC1901176 | --- | 1.97E-08 | 4 | 9.77 | 7.71 | 7.62 | 7.86 | 7.74 | 8.27 | 8.35 | 8.20 |
| TC1400054 | --- | 2.26E-08 | 4 | 3.81 | 3.44 | 3.45 | 3.42 | 3.39 | 3.36 | 3.44 | 3.47 |
| TC2100239 | --- | 2.27E-08 | 4 | 6.77 | 6.19 | 6.12 | 6.10 | 6.14 | 6.22 | 6.23 | 6.22 |
| TC2100193 | --- | 2.43E-08 | 4 | 6.94 | 6.53 | 6.47 | 6.34 | 6.41 | 6.47 | 6.40 | 6.47 |
| TC0200196 | --- | 3.08E-08 | 4 | 5.16 | 3.71 | 4.00 | 4.20 | 3.93 | 4.06 | 4.13 | 3.87 |
| TC0601756 | --- | 3.11E-08 | 4 | 5.36 | 3.96 | 3.99 | 4.17 | 3.96 | 4.18 | 4.27 | 4.18 |
| TC0202312 | --- | 3.20E-08 | 4 | 5.73 | 3.22 | 3.08 | 3.75 | 3.55 | 4.06 | 3.98 | 3.55 |
| TC1100701 | --- | 3.23E-08 | 4 | 6.35 | 5.27 | 4.99 | 4.85 | 4.88 | 5.11 | 4.88 | 4.90 |
| TC1800016 | --- | 3.44E-08 | 4 | 6.32 | 5.42 | 5.28 | 5.13 | 5.13 | 5.38 | 5.49 | 5.46 |
| TC0103193 | --- | 3.64E-08 | 4 | 3.74 | 2.56 | 2.62 | 2.76 | 2.63 | 2.79 | 2.94 | 2.82 |
| TC0700599 | --- | 3.66E-08 | 4 | 4.59 | 3.45 | 3.25 | 3.31 | 3.35 | 3.45 | 3.69 | 3.49 |
| TC0400064 | --- | 3.66E-08 | 4 | 5.88 | 5.08 | 4.85 | 4.79 | 4.83 | 5.00 | 5.08 | 4.95 |
| TC1600249 | --- | 3.69E-08 | 4 | 9.07 | 8.23 | 8.02 | 7.91 | 7.95 | 7.95 | 8.21 | 8.02 |
| TC0301889 | --- | 3.69E-08 | 4 | 5.65 | 5.22 | 5.15 | 5.23 | 5.18 | 5.17 | 5.25 | 5.26 |
| TC0700961 | --- | 4.06E-08 | 4 | 5.99 | 4.07 | 3.96 | 4.11 | 3.95 | 4.23 | 4.20 | 4.57 |
| TC1700522 | --- | 4.72E-08 | 4 | 5.27 | 4.94 | 4.89 | 4.88 | 4.90 | 4.94 | 4.90 | 5.00 |
| TC0701366 | --- | 5.20E-08 | 4 | 5.07 | 3.75 | 3.75 | 3.80 | 3.84 | 4.05 | 4.19 | 4.12 |
| TC1701260 | --- | 5.51E-08 | 4 | 3.97 | 2.90 | 2.93 | 2.99 | 2.79 | 3.36 | 3.70 | 3.58 |
| TC1901715 | --- | 5.65E-08 | 4 | 8.84 | 8.06 | 8.03 | 7.97 | 7.99 | 8.14 | 8.23 | 8.17 |
| TC1600495 | --- | 6.17E-08 | 4 | 8.20 | 7.42 | 7.47 | 7.45 | 7.54 | 7.70 | 7.66 | 7.62 |
| TC0102691 | --- | 6.34E-08 | 4 | 7.32 | 5.87 | 5.91 | 6.00 | 6.10 | 6.27 | 6.43 | 6.24 |
| TC0201786 | --- | 6.63E-08 | 4 | 9.08 | 8.54 | 8.21 | 8.16 | 8.05 | 8.21 | 8.39 | 8.28 |
| TC0300065 | --- | 7.05E-08 | 4 | 7.31 | 5.64 | 5.56 | 5.60 | 5.83 | 6.25 | 6.30 | 6.24 |
| TC2000460 | --- | 7.62E-08 | 4 | 6.20 | 5.37 | 5.36 | 5.63 | 5.56 | 5.61 | 5.67 | 5.46 |
| TC0201510 | --- | 7.68E-08 | 4 | 4.39 | 3.86 | 3.80 | 3.84 | 3.94 | 4.01 | 3.92 | 3.96 |
| TC0100969 | --- | 8.20E-08 | 4 | 6.01 | 4.69 | 4.79 | 4.95 | 4.81 | 4.96 | 5.46 | 5.34 |
| TC1400769 | --- | 8.53E-08 | 4 | 5.41 | 4.62 | 4.78 | 4.51 | 4.51 | 4.58 | 4.70 | 4.73 |
| TC1901310 | --- | 9.39E-08 | 4 | 4.42 | 3.71 | 3.71 | 3.70 | 3.66 | 3.57 | 3.67 | 3.68 |
| TC0400475 | --- | 9.51E-08 | 4 | 9.90 | 9.25 | 9.29 | 9.12 | 9.17 | 9.32 | 9.32 | 9.28 |

|           |        |          |   |       |       |       |       |       |       |       |       |
|-----------|--------|----------|---|-------|-------|-------|-------|-------|-------|-------|-------|
| TC1601212 | ---    | 1.02E-07 | 4 | 10.96 | 10.45 | 10.47 | 10.43 | 10.50 | 10.52 | 10.48 | 10.49 |
| TC1700793 | ---    | 1.06E-07 | 4 | 6.87  | 6.56  | 6.58  | 6.54  | 6.58  | 6.61  | 6.55  | 6.62  |
| TC0500151 | ---    | 1.07E-07 | 4 | 5.44  | 4.38  | 4.46  | 4.59  | 4.87  | 4.77  | 5.04  | 4.89  |
| TC0800944 | ---    | 1.07E-07 | 4 | 8.76  | 8.28  | 7.79  | 7.75  | 7.45  | 7.92  | 7.94  | 7.96  |
| TC0700188 | ---    | 1.08E-07 | 4 | 5.18  | 3.73  | 3.58  | 3.84  | 3.54  | 3.94  | 4.28  | 4.06  |
| TC0700377 | ---    | 1.09E-07 | 4 | 10.46 | 9.75  | 9.59  | 9.99  | 9.97  | 10.06 | 10.05 | 10.24 |
| TC0600680 | ---    | 1.15E-07 | 4 | 3.95  | 3.18  | 3.09  | 3.54  | 3.32  | 3.46  | 3.60  | 3.55  |
| TC1201069 | ---    | 1.23E-07 | 4 | 5.45  | 4.60  | 4.53  | 4.62  | 4.64  | 4.76  | 4.80  | 4.62  |
| TC1001214 | ---    | 1.23E-07 | 4 | 4.68  | 3.98  | 3.98  | 4.04  | 4.02  | 4.19  | 4.25  | 4.19  |
| TC0100911 | ---    | 1.27E-07 | 4 | 5.65  | 4.67  | 4.55  | 4.66  | 4.72  | 4.94  | 5.14  | 5.05  |
| TC1700449 | ---    | 1.28E-07 | 4 | 12.44 | 12.25 | 12.24 | 12.21 | 12.23 | 12.27 | 12.24 | 12.25 |
| TC1501053 | ---    | 1.39E-07 | 4 | 4.92  | 3.63  | 3.50  | 3.42  | 3.54  | 3.56  | 3.66  | 3.76  |
| TC0200222 | ---    | 1.40E-07 | 4 | 4.28  | 3.37  | 3.38  | 3.38  | 3.40  | 3.35  | 3.50  | 3.51  |
| TC1500826 | ---    | 1.41E-07 | 4 | 4.15  | 3.62  | 3.55  | 3.58  | 3.56  | 3.60  | 3.59  | 3.59  |
| TC0101101 | ---    | 1.43E-07 | 4 | 5.22  | 4.33  | 4.18  | 4.14  | 4.13  | 4.34  | 4.65  | 4.75  |
| TC0700024 | ---    | 1.47E-07 | 4 | 9.37  | 8.57  | 8.79  | 8.75  | 8.67  | 8.78  | 8.82  | 8.93  |
| TC2200029 | ---    | 1.59E-07 | 4 | 8.73  | 7.58  | 7.42  | 7.43  | 7.43  | 7.73  | 7.55  | 7.78  |
| TC0801041 | ---    | 1.64E-07 | 4 | 4.30  | 3.86  | 3.89  | 3.74  | 3.81  | 3.83  | 3.86  | 3.71  |
| TC1400964 | ---    | 1.78E-07 | 4 | 5.07  | 4.80  | 4.62  | 4.54  | 4.56  | 4.91  | 4.87  | 5.08  |
| TC1900971 | ---    | 1.82E-07 | 4 | 10.78 | 10.27 | 10.27 | 10.10 | 10.09 | 10.09 | 10.15 | 10.04 |
| TC1201685 | ---    | 1.96E-07 | 4 | 11.07 | 9.19  | 9.03  | 9.30  | 9.11  | 9.49  | 9.68  | 9.39  |
| TC1000341 | ---    | 2.15E-07 | 4 | 4.83  | 3.26  | 3.08  | 3.21  | 3.48  | 3.36  | 3.18  | 3.23  |
| TC1600219 | ---    | 2.32E-07 | 4 | 4.44  | 4.14  | 4.10  | 4.16  | 4.19  | 4.24  | 4.19  | 4.26  |
| TC1000174 | ---    | 2.34E-07 | 4 | 9.43  | 8.84  | 8.78  | 8.57  | 8.57  | 8.61  | 8.69  | 8.52  |
| TC1601192 | ---    | 2.36E-07 | 4 | 4.47  | 3.20  | 3.29  | 3.35  | 3.41  | 3.36  | 3.82  | 3.64  |
| TC0800047 | ---    | 2.43E-07 | 4 | 4.12  | 2.98  | 2.70  | 2.87  | 2.81  | 2.91  | 2.87  | 3.03  |
| TC0500693 | ---    | 2.45E-07 | 4 | 5.16  | 4.60  | 4.49  | 4.55  | 4.54  | 4.75  | 4.85  | 4.73  |
| TC1601214 | 652516 | 2.58E-07 | 4 | 4.26  | 3.79  | 3.76  | 3.67  | 3.71  | 3.72  | 3.83  | 3.73  |
| TC0500067 | ---    | 2.66E-07 | 4 | 4.95  | 4.50  | 4.23  | 4.04  | 4.02  | 4.26  | 4.37  | 4.88  |
| TC1300385 | ---    | 2.66E-07 | 4 | 5.33  | 4.51  | 4.24  | 4.50  | 4.26  | 4.56  | 4.79  | 4.58  |
| TC1600921 | ---    | 2.74E-07 | 4 | 3.74  | 2.30  | 2.05  | 2.45  | 2.29  | 2.40  | 2.85  | 2.85  |
| TC0400599 | ---    | 2.80E-07 | 4 | 6.69  | 5.09  | 5.11  | 5.46  | 5.32  | 5.36  | 5.97  | 5.64  |
| TC0901391 | ---    | 2.90E-07 | 4 | 4.24  | 3.57  | 3.58  | 3.65  | 3.62  | 3.75  | 3.81  | 3.87  |
| TC2200162 | ---    | 3.08E-07 | 4 | 5.66  | 5.04  | 5.08  | 5.15  | 5.06  | 5.14  | 5.14  | 5.12  |

|            |     |          |   |       |       |       |       |       |       |       |       |
|------------|-----|----------|---|-------|-------|-------|-------|-------|-------|-------|-------|
| TC17r00023 | --- | 3.27E-07 | 4 | 6.19  | 5.57  | 5.59  | 5.65  | 5.70  | 5.62  | 5.64  | 5.53  |
| TC1700781  | --- | 3.46E-07 | 4 | 6.01  | 4.11  | 4.05  | 4.04  | 4.32  | 4.29  | 4.49  | 4.55  |
| TC0300921  | --- | 3.52E-07 | 4 | 6.04  | 5.61  | 5.53  | 5.59  | 5.53  | 5.51  | 5.66  | 5.63  |
| TC2000292  | --- | 3.52E-07 | 4 | 5.24  | 4.80  | 4.78  | 4.81  | 4.83  | 5.07  | 4.93  | 5.08  |
| TC0103268  | --- | 3.68E-07 | 4 | 10.06 | 9.19  | 9.19  | 9.00  | 9.06  | 8.95  | 9.13  | 8.84  |
| TC1200006  | --- | 3.86E-07 | 4 | 6.21  | 4.49  | 4.30  | 4.53  | 4.33  | 4.44  | 4.55  | 4.78  |
| TC1701382  | --- | 4.28E-07 | 4 | 3.38  | 2.86  | 2.76  | 2.73  | 2.84  | 2.90  | 2.87  | 2.97  |
| TC1700479  | --- | 4.32E-07 | 4 | 4.07  | 3.33  | 3.12  | 3.09  | 3.32  | 3.48  | 3.19  | 3.47  |
| TC0500983  | --- | 4.61E-07 | 4 | 8.02  | 7.29  | 7.21  | 6.99  | 7.14  | 7.32  | 7.38  | 7.34  |
| TC01r00010 | --- | 4.86E-07 | 4 | 7.76  | 7.05  | 7.13  | 7.22  | 7.19  | 7.22  | 7.28  | 7.17  |
| TC0102721  | --- | 4.95E-07 | 4 | 9.09  | 8.04  | 7.82  | 8.24  | 8.08  | 8.44  | 8.33  | 8.37  |
| TC2000351  | --- | 5.00E-07 | 4 | 6.59  | 5.68  | 5.31  | 5.46  | 5.40  | 5.38  | 5.33  | 5.49  |
| TC0800942  | --- | 5.03E-07 | 4 | 6.64  | 5.30  | 4.95  | 4.91  | 4.64  | 4.90  | 5.03  | 4.98  |
| TC1100723  | --- | 5.21E-07 | 4 | 7.75  | 6.83  | 6.68  | 6.83  | 6.75  | 6.93  | 7.04  | 6.97  |
| TC1601140  | --- | 5.33E-07 | 4 | 4.44  | 3.61  | 3.57  | 3.34  | 3.48  | 3.45  | 3.49  | 3.59  |
| TC1600980  | --- | 5.48E-07 | 4 | 6.22  | 4.92  | 5.11  | 4.93  | 4.94  | 4.84  | 5.12  | 5.12  |
| TC1701196  | --- | 6.26E-07 | 4 | 8.10  | 6.94  | 6.69  | 6.85  | 6.68  | 6.81  | 6.97  | 6.94  |
| TC1900658  | --- | 6.30E-07 | 4 | 3.78  | 3.22  | 3.13  | 3.03  | 3.07  | 3.16  | 3.13  | 3.32  |
| TC1201321  | --- | 6.41E-07 | 4 | 10.98 | 10.53 | 10.57 | 10.50 | 10.58 | 10.57 | 10.57 | 10.58 |
| TC2000841  | --- | 6.46E-07 | 4 | 5.28  | 4.46  | 4.52  | 4.43  | 4.46  | 4.74  | 4.81  | 4.67  |
| TC0101749  | --- | 6.83E-07 | 4 | 10.73 | 10.28 | 10.30 | 10.15 | 10.15 | 10.17 | 10.26 | 10.06 |
| TC0100259  | --- | 7.17E-07 | 4 | 11.29 | 10.90 | 10.98 | 10.90 | 10.92 | 10.97 | 10.91 | 10.89 |
| TC0201464  | --- | 7.61E-07 | 4 | 4.96  | 4.53  | 4.48  | 4.35  | 4.38  | 4.50  | 4.43  | 4.44  |
| TC0100638  | --- | 7.72E-07 | 4 | 4.04  | 3.36  | 3.37  | 3.61  | 3.66  | 3.75  | 3.75  | 3.65  |
| TC2000219  | --- | 7.83E-07 | 4 | 7.30  | 6.39  | 6.33  | 6.60  | 6.60  | 6.76  | 6.82  | 6.65  |
| TC0103349  | --- | 8.03E-07 | 4 | 5.28  | 3.72  | 3.62  | 3.89  | 3.68  | 3.86  | 3.87  | 4.11  |
| TC1101278  | --- | 8.04E-07 | 4 | 3.06  | 2.66  | 2.61  | 2.65  | 2.63  | 2.57  | 2.58  | 2.61  |
| TC0701190  | --- | 8.07E-07 | 4 | 6.47  | 5.77  | 5.87  | 5.61  | 5.46  | 5.73  | 5.77  | 5.71  |
| TC1101202  | --- | 8.55E-07 | 4 | 8.00  | 6.78  | 6.73  | 6.96  | 6.85  | 6.92  | 6.99  | 6.72  |
| TC1200667  | --- | 8.57E-07 | 4 | 4.94  | 3.81  | 3.81  | 3.70  | 3.89  | 3.60  | 3.71  | 3.86  |
| TC0102027  | --- | 9.67E-07 | 4 | 10.90 | 10.20 | 10.28 | 10.26 | 10.32 | 10.36 | 10.39 | 10.33 |
| TC0800085  | --- | 1.03E-06 | 4 | 4.65  | 4.01  | 4.00  | 4.08  | 3.98  | 4.07  | 4.03  | 4.09  |
| TC0100910  | --- | 1.03E-06 | 4 | 6.50  | 5.99  | 6.07  | 6.15  | 6.13  | 6.19  | 6.22  | 6.23  |
| TC1901333  | --- | 1.04E-06 | 4 | 12.51 | 12.06 | 11.97 | 12.01 | 12.00 | 12.05 | 12.14 | 12.04 |



|            |     |          |   |       |      |      |      |       |       |       |       |
|------------|-----|----------|---|-------|------|------|------|-------|-------|-------|-------|
| TC1100523  | --- | 1.14E-06 | 4 | 8.12  | 7.71 | 7.62 | 7.60 | 7.70  | 7.71  | 7.62  | 7.68  |
| TC0300264  | --- | 1.16E-06 | 4 | 3.02  | 2.37 | 2.37 | 2.34 | 2.25  | 2.39  | 2.25  | 2.39  |
| TC0600268  | --- | 1.24E-06 | 4 | 6.47  | 5.54 | 5.53 | 5.59 | 5.69  | 5.82  | 6.01  | 5.76  |
| TC0100988  | --- | 1.28E-06 | 4 | 7.36  | 6.64 | 6.74 | 6.77 | 6.58  | 6.84  | 7.03  | 6.98  |
| TC0600392  | --- | 1.44E-06 | 4 | 6.45  | 5.68 | 5.64 | 5.51 | 5.42  | 5.78  | 5.86  | 5.88  |
| TC2200247  | --- | 1.45E-06 | 4 | 7.34  | 6.01 | 5.85 | 5.38 | 5.71  | 6.49  | 6.58  | 6.55  |
| TC0100356  | --- | 1.46E-06 | 4 | 5.41  | 5.09 | 4.89 | 4.90 | 4.90  | 5.00  | 4.96  | 4.97  |
| TC0501203  | --- | 1.51E-06 | 4 | 4.10  | 3.54 | 3.26 | 3.46 | 3.10  | 3.21  | 3.19  | 3.30  |
| TC1201158  | --- | 1.52E-06 | 4 | 5.42  | 3.84 | 3.18 | 3.61 | 3.37  | 3.58  | 3.71  | 4.08  |
| TC1701527  | --- | 1.55E-06 | 4 | 7.00  | 6.53 | 6.18 | 6.22 | 6.14  | 6.41  | 6.38  | 6.41  |
| TC1901529  | --- | 1.58E-06 | 4 | 7.06  | 6.10 | 6.08 | 6.18 | 6.17  | 6.36  | 6.40  | 6.40  |
| TC0800716  | --- | 1.63E-06 | 4 | 4.98  | 5.02 | 4.25 | 4.37 | 4.36  | 4.64  | 4.49  | 4.79  |
| TC1901568  | --- | 1.64E-06 | 4 | 6.60  | 5.79 | 4.99 | 5.38 | 5.42  | 6.09  | 6.08  | 6.11  |
| TC1900265  | --- | 1.68E-06 | 4 | 7.20  | 6.41 | 6.08 | 6.31 | 6.34  | 6.28  | 6.15  | 6.09  |
| TC1900264  | --- | 1.69E-06 | 4 | 6.92  | 6.01 | 5.56 | 5.84 | 5.88  | 5.90  | 5.78  | 5.78  |
| TC0200445  | --- | 1.75E-06 | 4 | 3.10  | 2.70 | 2.65 | 2.70 | 2.77  | 2.73  | 2.75  | 2.73  |
| TC1700039  | --- | 1.78E-06 | 4 | 5.13  | 3.75 | 3.88 | 3.74 | 3.98  | 3.73  | 3.87  | 3.95  |
| TC0101125  | --- | 1.81E-06 | 4 | 5.31  | 4.25 | 3.86 | 3.92 | 4.21  | 4.16  | 4.30  | 4.30  |
| TC0300448  | --- | 1.83E-06 | 4 | 3.45  | 2.57 | 2.72 | 2.49 | 2.66  | 2.76  | 2.88  | 2.88  |
| TC0400461  | --- | 1.83E-06 | 4 | 4.43  | 3.71 | 3.58 | 3.64 | 3.65  | 3.66  | 3.73  | 3.64  |
| TC0102621  | --- | 1.84E-06 | 4 | 4.24  | 2.93 | 3.33 | 3.18 | 3.18  | 3.52  | 3.35  | 3.37  |
| TC1000359  | --- | 1.89E-06 | 4 | 8.45  | 7.84 | 7.90 | 7.80 | 7.79  | 7.91  | 7.88  | 7.86  |
| TC0501095  | --- | 2.06E-06 | 4 | 10.83 | 9.92 | 9.90 | 9.99 | 10.09 | 10.17 | 10.37 | 10.23 |
| TC0800692  | --- | 2.10E-06 | 4 | 7.20  | 6.48 | 6.31 | 6.48 | 6.27  | 6.61  | 6.77  | 6.97  |
| TC1000897  | --- | 2.14E-06 | 4 | 8.17  | 6.75 | 6.66 | 6.75 | 6.79  | 6.99  | 7.32  | 7.24  |
| TC1600413  | --- | 2.17E-06 | 4 | 6.13  | 5.51 | 5.16 | 5.21 | 4.95  | 5.16  | 5.27  | 5.29  |
| TC0301677  | --- | 2.22E-06 | 4 | 3.71  | 3.47 | 3.46 | 3.40 | 3.54  | 3.46  | 3.36  | 3.46  |
| TC1600436  | --- | 2.28E-06 | 4 | 6.60  | 5.09 | 4.90 | 4.95 | 4.95  | 5.56  | 5.33  | 5.51  |
| TC1400824  | --- | 2.45E-06 | 4 | 4.63  | 4.33 | 4.35 | 4.33 | 4.34  | 4.32  | 4.26  | 4.35  |
| TC1100391  | --- | 2.50E-06 | 4 | 5.21  | 4.65 | 4.62 | 4.68 | 4.78  | 4.81  | 4.92  | 4.97  |
| TC1600867  | --- | 2.61E-06 | 4 | 7.30  | 6.14 | 5.79 | 6.00 | 6.06  | 6.03  | 6.36  | 6.15  |
| TC0200597  | --- | 2.70E-06 | 4 | 4.63  | 3.78 | 4.02 | 4.32 | 4.30  | 4.25  | 4.13  | 4.30  |
| TC0800052  | --- | 2.73E-06 | 4 | 4.77  | 3.86 | 3.78 | 3.71 | 3.74  | 3.93  | 3.90  | 3.90  |
| TC22r00001 | --- | 2.81E-06 | 4 | 7.69  | 7.21 | 6.93 | 7.04 | 6.97  | 7.05  | 7.21  | 7.34  |

|           |        |          |   |       |       |       |       |       |       |       |       |
|-----------|--------|----------|---|-------|-------|-------|-------|-------|-------|-------|-------|
| TC0600801 | ---    | 2.82E-06 | 4 | 5.93  | 5.25  | 4.65  | 4.78  | 4.79  | 5.15  | 5.18  | 5.10  |
| TC0901045 | ---    | 3.08E-06 | 4 | 3.66  | 2.93  | 3.39  | 2.80  | 3.13  | 3.05  | 3.20  | 3.09  |
| TC1200727 | ---    | 3.11E-06 | 4 | 8.46  | 7.22  | 7.04  | 7.16  | 7.07  | 7.52  | 7.50  | 7.43  |
| TC1500727 | ---    | 3.11E-06 | 4 | 3.63  | 3.17  | 2.84  | 3.02  | 2.96  | 3.01  | 3.12  | 3.18  |
| TC0700969 | ---    | 3.27E-06 | 4 | 3.15  | 2.34  | 2.29  | 2.34  | 2.27  | 2.40  | 2.64  | 2.60  |
| TC2100035 | ---    | 3.28E-06 | 4 | 4.07  | 3.60  | 3.57  | 3.35  | 3.34  | 3.57  | 3.50  | 3.45  |
| TC1800061 | ---    | 3.30E-06 | 4 | 3.31  | 2.64  | 2.70  | 2.58  | 2.60  | 2.69  | 2.76  | 2.90  |
| TC1700826 | ---    | 3.33E-06 | 4 | 9.11  | 8.10  | 7.94  | 8.27  | 8.09  | 8.45  | 8.74  | 8.67  |
| TC0601198 | ---    | 3.37E-06 | 4 | 7.03  | 6.29  | 6.21  | 6.34  | 6.41  | 6.51  | 6.64  | 6.54  |
| TC0300268 | ---    | 3.60E-06 | 4 | 8.31  | 6.85  | 6.89  | 7.39  | 7.37  | 7.53  | 7.59  | 7.82  |
| TC0900140 | ---    | 3.67E-06 | 4 | 7.74  | 7.02  | 6.63  | 6.56  | 6.27  | 6.54  | 6.58  | 6.48  |
| TC1200729 | ---    | 3.72E-06 | 4 | 4.65  | 3.95  | 3.89  | 4.00  | 4.04  | 3.98  | 3.98  | 4.00  |
| TC0500493 | ---    | 3.73E-06 | 4 | 5.03  | 4.67  | 4.59  | 4.65  | 4.70  | 4.64  | 4.72  | 4.69  |
| TC0202199 | ---    | 3.83E-06 | 4 | 7.03  | 6.25  | 6.21  | 6.25  | 6.29  | 6.35  | 6.35  | 6.31  |
| TC1900125 | ---    | 3.98E-06 | 4 | 4.81  | 4.27  | 4.31  | 4.26  | 4.29  | 4.34  | 4.44  | 4.31  |
| TC2000132 | ---    | 4.08E-06 | 4 | 9.13  | 8.38  | 8.43  | 8.41  | 8.47  | 8.55  | 8.54  | 8.49  |
| TC1600216 | ---    | 4.23E-06 | 4 | 5.91  | 4.75  | 4.62  | 4.19  | 4.68  | 4.67  | 5.18  | 4.73  |
| TC0401085 | ---    | 4.26E-06 | 4 | 4.40  | 3.47  | 3.43  | 3.36  | 3.63  | 3.80  | 3.85  | 4.04  |
| TC0601691 | ---    | 4.33E-06 | 4 | 5.25  | 4.55  | 4.72  | 4.59  | 4.53  | 4.75  | 4.62  | 4.77  |
| TC1901795 | ---    | 4.71E-06 | 4 | 4.08  | 3.05  | 2.99  | 2.95  | 2.97  | 2.97  | 3.09  | 3.07  |
| TC0600745 | ---    | 5.12E-06 | 4 | 6.85  | 5.90  | 5.98  | 6.05  | 5.80  | 6.02  | 6.06  | 6.12  |
| TC1601001 | ---    | 5.28E-06 | 4 | 6.44  | 6.07  | 6.08  | 6.02  | 6.02  | 6.28  | 6.11  | 6.29  |
| TC0202224 | ---    | 5.30E-06 | 4 | 9.23  | 8.05  | 7.94  | 8.04  | 8.14  | 8.37  | 8.66  | 8.49  |
| TC0X01238 | ---    | 5.48E-06 | 4 | 3.80  | 3.39  | 3.35  | 3.14  | 3.08  | 3.19  | 3.24  | 3.34  |
| TC0200205 | ---    | 5.69E-06 | 4 | 5.54  | 4.83  | 4.82  | 4.88  | 4.90  | 4.95  | 5.05  | 5.00  |
| TC0202194 | ---    | 5.74E-06 | 4 | 5.84  | 5.40  | 5.31  | 5.30  | 5.30  | 5.41  | 5.34  | 5.34  |
| TC1900735 | ---    | 5.89E-06 | 4 | 5.58  | 5.18  | 5.21  | 5.24  | 5.22  | 5.28  | 5.31  | 5.31  |
| TC0300721 | ---    | 6.29E-06 | 4 | 5.42  | 4.39  | 4.43  | 4.25  | 4.26  | 4.42  | 4.67  | 4.68  |
| TC1901697 | ---    | 6.29E-06 | 4 | 4.69  | 4.19  | 4.07  | 4.13  | 4.14  | 4.56  | 4.32  | 4.57  |
| TC1700410 | ---    | 6.35E-06 | 4 | 6.61  | 5.74  | 5.93  | 6.26  | 6.18  | 6.22  | 6.21  | 5.89  |
| TC0700398 | 730307 | 6.73E-06 | 4 | 5.66  | 4.74  | 4.69  | 4.64  | 4.78  | 4.72  | 5.15  | 4.99  |
| TC0600119 | ---    | 6.85E-06 | 4 | 12.10 | 11.83 | 11.81 | 11.79 | 11.85 | 11.84 | 11.76 | 11.83 |
| TC0800048 | ---    | 6.88E-06 | 4 | 5.47  | 5.44  | 5.14  | 5.10  | 5.15  | 5.25  | 5.20  | 5.32  |
| TC0401303 | ---    | 7.02E-06 | 4 | 5.87  | 4.93  | 5.32  | 4.89  | 5.06  | 5.20  | 5.56  | 5.31  |

|            |        |          |   |       |       |       |       |       |       |       |       |
|------------|--------|----------|---|-------|-------|-------|-------|-------|-------|-------|-------|
| TC1500422  | ---    | 7.09E-06 | 4 | 8.32  | 7.91  | 7.95  | 7.87  | 7.94  | 7.91  | 7.82  | 7.95  |
| TC0900481  | ---    | 7.10E-06 | 4 | 5.70  | 4.83  | 4.82  | 5.01  | 4.66  | 4.85  | 4.99  | 4.97  |
| TC0202065  | ---    | 7.12E-06 | 4 | 2.93  | 2.55  | 2.55  | 2.50  | 2.47  | 2.50  | 2.49  | 2.65  |
| TC1701399  | ---    | 8.11E-06 | 4 | 6.91  | 6.48  | 6.52  | 6.47  | 6.53  | 6.56  | 6.54  | 6.54  |
| TC1200901  | ---    | 8.61E-06 | 4 | 5.04  | 4.80  | 4.75  | 4.85  | 4.90  | 4.95  | 4.87  | 4.89  |
| TC0200323  | ---    | 9.19E-06 | 4 | 6.02  | 5.18  | 5.21  | 5.11  | 5.18  | 5.16  | 5.27  | 5.12  |
| TC2200211  | ---    | 9.22E-06 | 4 | 3.71  | 3.22  | 3.15  | 3.10  | 3.29  | 3.14  | 3.40  | 3.16  |
| TC1701231  | ---    | 9.54E-06 | 4 | 4.75  | 3.34  | 2.98  | 3.31  | 3.00  | 3.37  | 3.46  | 3.31  |
| TC1100099  | ---    | 1.02E-05 | 4 | 4.86  | 4.29  | 4.24  | 4.33  | 4.30  | 4.57  | 4.57  | 4.46  |
| TC1100390  | ---    | 1.02E-05 | 4 | 6.48  | 6.01  | 5.93  | 5.91  | 5.93  | 6.00  | 6.13  | 6.35  |
| TC1400340  | ---    | 1.04E-05 | 4 | 5.81  | 4.91  | 4.31  | 4.31  | 4.27  | 5.00  | 4.89  | 5.01  |
| TC0800715  | ---    | 1.07E-05 | 4 | 6.58  | 6.46  | 5.85  | 6.11  | 6.08  | 6.09  | 6.16  | 6.24  |
| TC0601633  | ---    | 1.09E-05 | 4 | 4.30  | 4.02  | 4.02  | 3.95  | 3.94  | 3.99  | 3.95  | 4.02  |
| TC0100668  | ---    | 1.09E-05 | 4 | 6.25  | 5.69  | 5.58  | 5.49  | 5.30  | 5.73  | 5.72  | 5.68  |
| TC0201547  | ---    | 1.12E-05 | 4 | 5.45  | 4.70  | 4.75  | 4.59  | 4.49  | 4.79  | 4.72  | 4.72  |
| TC1000770  | ---    | 1.16E-05 | 4 | 6.20  | 5.64  | 5.68  | 5.57  | 5.57  | 5.68  | 5.78  | 5.76  |
| TC0500333  | ---    | 1.18E-05 | 4 | 3.54  | 3.17  | 3.15  | 3.22  | 3.26  | 3.30  | 3.21  | 3.40  |
| TC0500893  | ---    | 1.19E-05 | 4 | 3.83  | 3.01  | 3.17  | 3.11  | 3.09  | 3.48  | 3.36  | 3.34  |
| TC1701726  | ---    | 1.20E-05 | 4 | 11.65 | 11.37 | 11.37 | 11.30 | 11.40 | 11.40 | 11.32 | 11.38 |
| TC0700403  | 730307 | 1.24E-05 | 4 | 6.46  | 5.58  | 5.67  | 5.60  | 5.82  | 5.67  | 5.73  | 5.81  |
| TC0301100  | ---    | 1.25E-05 | 4 | 3.69  | 2.99  | 2.96  | 2.86  | 2.82  | 3.11  | 3.03  | 3.17  |
| TC0501444  | ---    | 1.25E-05 | 4 | 4.15  | 3.32  | 3.33  | 3.36  | 3.20  | 3.55  | 3.56  | 3.71  |
| TC0700376  | ---    | 1.26E-05 | 4 | 9.29  | 8.72  | 8.77  | 8.84  | 8.77  | 8.75  | 8.76  | 8.85  |
| TC0401067  | ---    | 1.31E-05 | 4 | 5.33  | 4.46  | 4.45  | 4.53  | 4.55  | 4.60  | 4.66  | 4.72  |
| TC1000510  | ---    | 1.38E-05 | 4 | 5.07  | 4.72  | 4.64  | 4.71  | 4.75  | 4.79  | 4.73  | 4.75  |
| TC0200290  | ---    | 1.38E-05 | 4 | 6.68  | 5.77  | 5.69  | 5.58  | 5.40  | 5.48  | 5.71  | 5.66  |
| TC0100862  | ---    | 1.42E-05 | 4 | 6.02  | 5.11  | 5.06  | 4.97  | 5.06  | 5.05  | 5.04  | 5.33  |
| TC1800121  | ---    | 1.45E-05 | 4 | 12.59 | 12.33 | 12.29 | 12.24 | 12.25 | 12.29 | 12.30 | 12.26 |
| TC1200298  | ---    | 1.46E-05 | 4 | 5.32  | 4.61  | 4.44  | 4.61  | 4.52  | 4.72  | 4.74  | 4.64  |
| TC1201151  | ---    | 1.49E-05 | 4 | 4.29  | 3.20  | 3.30  | 3.08  | 3.23  | 3.34  | 3.50  | 3.42  |
| TC0600796  | ---    | 1.52E-05 | 4 | 11.14 | 10.83 | 10.79 | 10.79 | 10.79 | 10.85 | 10.83 | 10.85 |
| TC1700856  | ---    | 1.53E-05 | 4 | 6.01  | 5.19  | 5.02  | 5.21  | 5.40  | 5.21  | 5.22  | 5.17  |
| TC1200821  | ---    | 1.57E-05 | 4 | 2.77  | 2.43  | 2.46  | 2.45  | 2.46  | 2.45  | 2.46  | 2.48  |
| TC0Xr00011 | ---    | 1.63E-05 | 4 | 5.97  | 5.58  | 5.81  | 5.47  | 5.16  | 5.60  | 5.65  | 5.79  |

|           |        |          |   |       |       |       |       |       |       |       |       |
|-----------|--------|----------|---|-------|-------|-------|-------|-------|-------|-------|-------|
| TC1000322 | ---    | 1.64E-05 | 4 | 4.45  | 4.17  | 3.84  | 3.71  | 3.82  | 3.94  | 3.83  | 3.93  |
| TC2200359 | ---    | 1.76E-05 | 4 | 5.06  | 4.64  | 4.48  | 4.51  | 4.50  | 4.50  | 4.19  | 4.67  |
| TC0300967 | ---    | 1.80E-05 | 4 | 3.98  | 3.22  | 3.37  | 3.23  | 3.10  | 3.14  | 3.27  | 3.41  |
| TC1400304 | ---    | 1.83E-05 | 4 | 6.94  | 6.41  | 6.36  | 6.38  | 6.37  | 6.49  | 6.42  | 6.55  |
| TC0200988 | ---    | 1.83E-05 | 4 | 7.74  | 7.08  | 6.89  | 6.91  | 6.97  | 6.87  | 7.18  | 7.09  |
| TC0701063 | ---    | 1.83E-05 | 4 | 6.44  | 5.69  | 5.47  | 5.26  | 5.40  | 5.89  | 5.71  | 5.92  |
| TC2000077 | ---    | 1.89E-05 | 4 | 3.59  | 3.18  | 3.19  | 3.05  | 3.08  | 3.07  | 3.10  | 3.21  |
| TC0100409 | ---    | 1.93E-05 | 4 | 5.89  | 5.27  | 5.15  | 5.16  | 5.26  | 5.38  | 5.37  | 5.37  |
| TC0Y00106 | ---    | 1.93E-05 | 4 | 7.39  | 6.87  | 6.82  | 6.87  | 6.91  | 7.01  | 7.00  | 6.91  |
| TC0601402 | ---    | 1.94E-05 | 4 | 5.87  | 4.61  | 4.87  | 4.74  | 4.84  | 5.12  | 5.04  | 5.08  |
| TC0900663 | ---    | 1.96E-05 | 4 | 6.41  | 5.73  | 5.54  | 5.63  | 5.73  | 5.83  | 5.95  | 5.91  |
| TC1900592 | ---    | 1.96E-05 | 4 | 9.69  | 9.40  | 9.43  | 9.35  | 9.43  | 9.42  | 9.35  | 9.41  |
| TC1201247 | ---    | 1.97E-05 | 4 | 5.63  | 4.90  | 4.98  | 5.11  | 5.02  | 5.22  | 5.19  | 5.18  |
| TC0102326 | ---    | 1.97E-05 | 4 | 5.46  | 4.88  | 4.88  | 4.91  | 4.90  | 4.93  | 4.81  | 4.86  |
| TC1901630 | ---    | 2.10E-05 | 4 | 5.92  | 5.35  | 5.16  | 5.17  | 5.34  | 5.53  | 5.46  | 5.43  |
| TC0101980 | ---    | 2.11E-05 | 4 | 11.31 | 10.88 | 10.91 | 10.85 | 10.96 | 10.96 | 10.83 | 10.91 |
| TC1400935 | ---    | 2.13E-05 | 4 | 5.49  | 5.11  | 4.82  | 4.76  | 4.83  | 5.14  | 4.91  | 4.94  |
| TC0600465 | ---    | 2.19E-05 | 4 | 5.63  | 4.95  | 4.75  | 4.82  | 5.09  | 5.14  | 5.20  | 5.18  |
| TC1901386 | ---    | 2.21E-05 | 4 | 3.64  | 3.01  | 3.13  | 2.86  | 3.06  | 3.04  | 3.17  | 3.16  |
| TC0501108 | ---    | 2.21E-05 | 4 | 5.43  | 5.20  | 5.25  | 5.27  | 5.48  | 5.43  | 5.28  | 5.26  |
| TC0700677 | ---    | 2.28E-05 | 4 | 6.90  | 5.86  | 6.09  | 6.09  | 6.04  | 6.05  | 6.21  | 5.95  |
| TC0300174 | ---    | 2.35E-05 | 4 | 4.21  | 2.97  | 3.12  | 3.39  | 3.28  | 3.04  | 3.42  | 3.41  |
| TC0100966 | ---    | 2.40E-05 | 4 | 6.30  | 5.82  | 5.89  | 5.90  | 5.93  | 6.04  | 6.02  | 6.04  |
| TC1401139 | ---    | 2.43E-05 | 4 | 7.67  | 7.14  | 6.69  | 6.38  | 6.66  | 6.81  | 7.00  | 6.76  |
| TC2200084 | ---    | 2.75E-05 | 4 | 7.81  | 6.47  | 6.59  | 6.53  | 6.49  | 6.60  | 6.63  | 6.33  |
| TC1900767 | 730718 | 2.77E-05 | 4 | 5.25  | 5.06  | 4.78  | 4.92  | 4.95  | 5.01  | 4.98  | 4.99  |
| TC2200457 | ---    | 2.88E-05 | 4 | 5.17  | 3.97  | 3.93  | 4.02  | 3.85  | 4.42  | 4.81  | 4.44  |
| TC2100428 | ---    | 3.03E-05 | 4 | 7.01  | 6.25  | 6.02  | 6.09  | 6.21  | 6.19  | 6.37  | 6.38  |
| TC1501247 | ---    | 3.04E-05 | 4 | 7.30  | 6.78  | 6.85  | 6.80  | 6.72  | 6.90  | 6.75  | 6.84  |
| TC0500465 | ---    | 3.08E-05 | 4 | 3.10  | 2.14  | 2.41  | 2.16  | 2.37  | 2.23  | 2.10  | 2.20  |
| TC0900417 | ---    | 3.11E-05 | 4 | 6.01  | 5.83  | 5.82  | 5.79  | 5.76  | 5.79  | 5.76  | 5.80  |
| TC0701364 | 730307 | 3.13E-05 | 4 | 3.81  | 3.30  | 3.22  | 3.16  | 3.22  | 3.28  | 3.28  | 3.31  |
| TC1200446 | ---    | 3.40E-05 | 4 | 5.68  | 5.02  | 4.78  | 4.85  | 4.91  | 5.23  | 5.41  | 5.07  |
| TC0800122 | ---    | 3.43E-05 | 4 | 7.52  | 6.38  | 6.47  | 6.68  | 6.59  | 6.72  | 6.87  | 6.91  |

|           |        |          |   |       |       |       |       |       |       |       |       |
|-----------|--------|----------|---|-------|-------|-------|-------|-------|-------|-------|-------|
| TC2200272 | ---    | 3.45E-05 | 4 | 5.39  | 4.91  | 4.41  | 4.70  | 4.48  | 4.72  | 4.68  | 4.65  |
| TC1601141 | ---    | 3.48E-05 | 4 | 7.13  | 5.91  | 5.88  | 5.75  | 6.01  | 6.05  | 6.08  | 5.94  |
| TC1100102 | ---    | 3.55E-05 | 4 | 9.34  | 6.51  | 5.83  | 7.48  | 7.84  | 7.94  | 7.42  | 7.88  |
| TC1000931 | ---    | 3.62E-05 | 4 | 5.48  | 4.52  | 4.59  | 4.66  | 4.65  | 4.62  | 4.91  | 4.59  |
| TC1701618 | ---    | 3.73E-05 | 4 | 4.33  | 3.21  | 3.28  | 2.94  | 3.13  | 3.10  | 3.26  | 3.26  |
| TC0700325 | 653841 | 3.75E-05 | 4 | 4.48  | 4.21  | 4.13  | 4.20  | 4.21  | 4.24  | 4.31  | 4.25  |
| TC0102544 | ---    | 3.83E-05 | 4 | 3.87  | 3.54  | 3.46  | 3.56  | 3.57  | 3.47  | 3.51  | 3.55  |
| TC1701396 | ---    | 3.89E-05 | 4 | 2.75  | 2.09  | 2.04  | 1.99  | 2.03  | 2.00  | 2.05  | 1.97  |
| TC1201443 | ---    | 3.97E-05 | 4 | 3.60  | 3.30  | 3.19  | 3.23  | 3.35  | 3.26  | 3.32  | 3.38  |
| TC0101842 | ---    | 4.05E-05 | 4 | 5.26  | 4.75  | 4.77  | 4.76  | 4.79  | 4.73  | 4.70  | 4.76  |
| TC0600302 | ---    | 4.09E-05 | 4 | 5.66  | 5.16  | 4.93  | 4.77  | 4.98  | 4.82  | 5.32  | 4.89  |
| TC0301488 | ---    | 4.11E-05 | 4 | 9.52  | 9.11  | 8.69  | 8.81  | 8.67  | 9.04  | 8.97  | 8.93  |
| TC0500016 | ---    | 4.11E-05 | 4 | 5.90  | 5.08  | 5.14  | 5.27  | 5.22  | 5.20  | 5.23  | 5.28  |
| TC0400643 | ---    | 4.26E-05 | 4 | 6.96  | 6.28  | 5.81  | 6.12  | 5.89  | 6.31  | 6.31  | 6.36  |
| TC1101490 | ---    | 4.30E-05 | 4 | 7.49  | 6.75  | 6.30  | 6.35  | 6.42  | 6.54  | 6.80  | 6.76  |
| TC0900255 | ---    | 4.46E-05 | 4 | 5.87  | 5.33  | 5.18  | 5.19  | 5.30  | 5.12  | 5.37  | 5.25  |
| TC1100844 | ---    | 4.49E-05 | 4 | 5.97  | 5.75  | 5.70  | 5.69  | 5.64  | 5.75  | 5.75  | 5.75  |
| TC1700373 | ---    | 4.51E-05 | 4 | 4.34  | 3.52  | 3.54  | 3.37  | 3.56  | 3.61  | 3.70  | 3.80  |
| TC1500999 | ---    | 4.60E-05 | 4 | 4.52  | 4.03  | 3.90  | 3.97  | 4.00  | 4.16  | 4.00  | 3.88  |
| TC1700652 | ---    | 4.65E-05 | 4 | 5.97  | 5.40  | 4.91  | 5.12  | 4.87  | 5.32  | 5.42  | 5.29  |
| TC0201465 | ---    | 4.65E-05 | 4 | 3.45  | 3.10  | 3.07  | 3.04  | 3.10  | 3.10  | 3.03  | 3.08  |
| TC0601550 | ---    | 4.76E-05 | 4 | 5.60  | 4.39  | 4.08  | 4.35  | 4.48  | 4.54  | 4.77  | 4.69  |
| TC0102908 | ---    | 4.79E-05 | 4 | 3.44  | 2.28  | 2.53  | 2.68  | 2.61  | 2.80  | 2.93  | 2.68  |
| TC0401278 | ---    | 5.23E-05 | 4 | 3.78  | 3.08  | 3.02  | 3.13  | 3.07  | 2.88  | 3.00  | 2.97  |
| TC0800194 | ---    | 5.27E-05 | 4 | 5.70  | 5.21  | 5.26  | 5.07  | 5.19  | 5.16  | 5.18  | 5.12  |
| TC0400177 | ---    | 5.27E-05 | 4 | 5.35  | 4.48  | 4.20  | 4.61  | 4.05  | 4.23  | 4.23  | 4.25  |
| TC1101886 | ---    | 5.33E-05 | 4 | 3.14  | 2.54  | 2.46  | 2.42  | 2.52  | 2.58  | 2.69  | 2.62  |
| TC0501081 | ---    | 5.46E-05 | 4 | 6.24  | 5.00  | 4.67  | 5.24  | 4.87  | 5.27  | 5.43  | 5.20  |
| TC2000838 | ---    | 5.62E-05 | 4 | 5.14  | 4.65  | 4.66  | 4.68  | 4.66  | 4.63  | 4.62  | 4.65  |
| TC1201337 | ---    | 5.64E-05 | 4 | 4.08  | 3.58  | 3.54  | 3.51  | 3.56  | 3.58  | 3.61  | 3.60  |
| TC0300016 | ---    | 5.66E-05 | 4 | 4.17  | 3.87  | 3.81  | 3.74  | 3.82  | 3.89  | 3.77  | 3.85  |
| TC0500387 | ---    | 5.76E-05 | 4 | 3.75  | 2.87  | 3.03  | 3.10  | 3.19  | 3.30  | 3.22  | 3.15  |
| TC1200769 | ---    | 5.88E-05 | 4 | 7.73  | 6.79  | 6.72  | 6.98  | 6.91  | 7.08  | 7.02  | 7.12  |
| TC1000507 | ---    | 5.88E-05 | 4 | 10.86 | 10.55 | 10.55 | 10.50 | 10.58 | 10.57 | 10.50 | 10.56 |

|            |        |          |   |       |       |       |       |       |       |       |       |
|------------|--------|----------|---|-------|-------|-------|-------|-------|-------|-------|-------|
| TC0200353  | ---    | 6.12E-05 | 4 | 4.06  | 3.59  | 3.65  | 3.82  | 3.70  | 3.83  | 3.83  | 3.83  |
| TC0701617  | ---    | 6.22E-05 | 4 | 4.09  | 3.32  | 3.41  | 3.10  | 3.21  | 3.33  | 3.38  | 3.40  |
| TC0600746  | ---    | 6.24E-05 | 4 | 8.82  | 7.70  | 7.92  | 8.07  | 7.75  | 7.95  | 7.94  | 7.89  |
| TC1100154  | ---    | 6.47E-05 | 4 | 6.12  | 5.20  | 5.09  | 5.31  | 5.31  | 5.67  | 5.68  | 5.68  |
| TC1600819  | ---    | 6.48E-05 | 4 | 4.70  | 4.22  | 4.27  | 4.45  | 4.28  | 4.16  | 4.09  | 4.14  |
| TC1900975  | 650495 | 6.51E-05 | 4 | 6.34  | 5.63  | 5.70  | 5.56  | 5.65  | 5.72  | 5.64  | 5.93  |
| TC1201188  | ---    | 6.53E-05 | 4 | 10.61 | 10.20 | 10.19 | 10.16 | 10.18 | 10.24 | 10.26 | 10.23 |
| TC0Y00118  | ---    | 6.56E-05 | 4 | 3.08  | 2.76  | 2.74  | 2.69  | 2.73  | 2.80  | 2.63  | 2.73  |
| TC1800257  | ---    | 6.66E-05 | 4 | 4.94  | 4.56  | 4.42  | 4.48  | 4.48  | 4.49  | 4.38  | 4.42  |
| TC0700788  | ---    | 6.66E-05 | 4 | 3.54  | 3.05  | 2.98  | 3.06  | 2.88  | 2.87  | 2.94  | 2.90  |
| TC0201976  | ---    | 6.77E-05 | 4 | 4.54  | 3.93  | 3.74  | 3.54  | 3.59  | 3.71  | 3.71  | 3.71  |
| TC0701289  | ---    | 6.86E-05 | 4 | 4.33  | 3.55  | 3.53  | 3.64  | 3.53  | 3.72  | 3.90  | 3.64  |
| TC2000842  | ---    | 6.86E-05 | 4 | 6.01  | 5.24  | 4.72  | 5.00  | 5.45  | 5.61  | 5.50  | 5.65  |
| TC0801252  | ---    | 7.00E-05 | 4 | 8.18  | 7.30  | 7.12  | 6.95  | 6.79  | 7.17  | 7.15  | 7.22  |
| TC0301684  | ---    | 7.07E-05 | 4 | 3.43  | 3.09  | 3.20  | 3.05  | 3.13  | 3.07  | 3.05  | 3.21  |
| TC1201433  | ---    | 7.13E-05 | 4 | 3.94  | 3.50  | 3.43  | 3.37  | 3.40  | 3.45  | 3.56  | 3.58  |
| TC0103175  | ---    | 7.25E-05 | 4 | 5.23  | 4.78  | 4.67  | 4.78  | 4.86  | 4.87  | 5.08  | 5.04  |
| TC1800503  | ---    | 7.36E-05 | 4 | 6.53  | 6.28  | 6.32  | 6.24  | 6.30  | 6.30  | 6.26  | 6.30  |
| TC0102276  | ---    | 7.38E-05 | 4 | 4.78  | 4.15  | 4.03  | 4.06  | 3.82  | 4.31  | 4.43  | 4.46  |
| TC0100191  | ---    | 7.51E-05 | 4 | 3.53  | 3.09  | 3.06  | 3.02  | 3.01  | 3.20  | 3.11  | 3.17  |
| TC1701560  | ---    | 7.51E-05 | 4 | 6.71  | 5.06  | 5.05  | 4.60  | 5.26  | 5.45  | 5.30  | 5.05  |
| TC0401108  | ---    | 7.79E-05 | 4 | 5.79  | 4.64  | 4.63  | 4.76  | 4.71  | 5.05  | 5.04  | 4.94  |
| TC1400487  | ---    | 8.01E-05 | 4 | 7.66  | 6.56  | 6.78  | 6.81  | 6.89  | 6.88  | 6.94  | 6.66  |
| TC1600345  | ---    | 8.07E-05 | 4 | 5.07  | 4.32  | 3.97  | 3.94  | 4.16  | 4.05  | 4.35  | 4.11  |
| TC0202411  | ---    | 8.12E-05 | 4 | 3.67  | 3.28  | 3.25  | 3.27  | 3.31  | 3.32  | 3.29  | 3.17  |
| TC2000536  | ---    | 8.21E-05 | 4 | 3.67  | 3.27  | 3.31  | 3.24  | 3.29  | 3.25  | 3.24  | 3.27  |
| TC0101925  | ---    | 8.22E-05 | 4 | 4.32  | 3.72  | 3.69  | 3.50  | 3.56  | 3.48  | 3.65  | 3.66  |
| TC0700596  | ---    | 8.33E-05 | 4 | 6.61  | 5.50  | 5.18  | 5.55  | 5.40  | 5.56  | 5.77  | 5.61  |
| TC0701776  | ---    | 8.51E-05 | 4 | 4.40  | 3.39  | 3.55  | 3.51  | 3.58  | 3.41  | 3.69  | 3.76  |
| TC0201878  | ---    | 8.60E-05 | 4 | 6.78  | 5.54  | 5.91  | 5.88  | 5.73  | 6.09  | 5.93  | 5.90  |
| TC1201717  | ---    | 8.61E-05 | 4 | 4.48  | 3.89  | 3.90  | 3.66  | 3.73  | 4.09  | 4.00  | 4.05  |
| TC15r00005 | ---    | 8.75E-05 | 4 | 7.33  | 6.52  | 6.35  | 6.47  | 6.54  | 6.45  | 6.19  | 6.51  |
| TC0100349  | ---    | 9.13E-05 | 4 | 6.26  | 5.31  | 5.04  | 5.28  | 5.25  | 5.25  | 5.45  | 5.32  |
| TC2000018  | ---    | 9.15E-05 | 4 | 5.85  | 5.48  | 5.48  | 5.43  | 5.35  | 5.43  | 5.37  | 5.41  |

|           |     |          |   |       |       |       |       |       |       |       |       |
|-----------|-----|----------|---|-------|-------|-------|-------|-------|-------|-------|-------|
| TC0101794 | --- | 9.35E-05 | 4 | 4.76  | 4.53  | 4.31  | 4.25  | 4.22  | 4.34  | 4.41  | 4.48  |
| TC0200174 | --- | 9.46E-05 | 4 | 5.12  | 4.49  | 4.43  | 4.50  | 4.60  | 4.59  | 4.64  | 4.57  |
| TC1500775 | --- | 9.85E-05 | 4 | 5.39  | 4.39  | 4.34  | 4.19  | 4.26  | 4.30  | 4.00  | 4.63  |
| TC0701338 | --- | 0.000101 | 4 | 8.74  | 8.23  | 8.27  | 8.34  | 8.29  | 8.29  | 8.29  | 8.35  |
| TC1101214 | --- | 0.000104 | 4 | 5.15  | 3.33  | 3.72  | 3.53  | 3.40  | 3.78  | 3.87  | 3.76  |
| TC0701505 | --- | 0.000104 | 4 | 11.26 | 11.01 | 11.08 | 10.95 | 11.06 | 11.09 | 10.99 | 11.04 |
| TC1900360 | --- | 0.000106 | 4 | 9.51  | 9.25  | 9.27  | 9.19  | 9.27  | 9.43  | 9.35  | 9.37  |
| TC0600964 | --- | 0.000106 | 4 | 4.17  | 3.62  | 3.54  | 3.75  | 3.70  | 3.66  | 3.70  | 3.93  |
| TC0200443 | --- | 0.000106 | 4 | 4.15  | 3.53  | 3.59  | 3.54  | 3.65  | 3.66  | 3.64  | 3.72  |
| TC0100904 | --- | 0.000106 | 4 | 5.13  | 4.78  | 4.85  | 4.67  | 4.66  | 4.80  | 4.85  | 4.78  |
| TC1101494 | --- | 0.000107 | 4 | 4.40  | 3.37  | 3.42  | 3.44  | 3.83  | 3.73  | 3.63  | 3.55  |
| TC1100188 | --- | 0.000108 | 4 | 3.48  | 2.99  | 2.81  | 2.71  | 2.89  | 2.89  | 2.92  | 3.03  |
| TC1200198 | --- | 0.000109 | 4 | 5.97  | 5.19  | 5.14  | 5.00  | 4.87  | 4.97  | 5.10  | 5.18  |
| TC1600556 | --- | 0.00011  | 4 | 3.29  | 2.31  | 2.35  | 2.23  | 2.38  | 2.21  | 2.52  | 2.47  |
| TC1400785 | --- | 0.000114 | 4 | 5.05  | 4.54  | 4.14  | 4.21  | 4.00  | 4.22  | 4.25  | 4.43  |
| TC1501116 | --- | 0.000114 | 4 | 9.89  | 9.65  | 9.68  | 9.59  | 9.70  | 9.68  | 9.60  | 9.64  |
| TC0600274 | --- | 0.000114 | 4 | 5.21  | 4.31  | 4.27  | 4.24  | 4.27  | 4.32  | 4.55  | 4.51  |
| TC1001313 | --- | 0.000117 | 4 | 10.08 | 9.71  | 9.84  | 9.69  | 9.78  | 9.77  | 9.77  | 9.74  |
| TC1300307 | --- | 0.000118 | 4 | 3.83  | 2.92  | 2.61  | 2.63  | 2.60  | 2.53  | 2.88  | 2.64  |
| TC0700250 | --- | 0.000121 | 4 | 4.55  | 4.27  | 4.14  | 4.10  | 4.06  | 4.21  | 4.36  | 4.31  |
| TC1100498 | --- | 0.000123 | 4 | 4.90  | 3.83  | 3.89  | 3.87  | 4.04  | 3.84  | 4.14  | 3.80  |
| TC1200897 | --- | 0.000123 | 4 | 3.83  | 2.26  | 2.66  | 2.81  | 2.59  | 2.90  | 3.16  | 3.10  |
| TC1500024 | --- | 0.000123 | 4 | 7.18  | 6.81  | 6.36  | 6.71  | 6.89  | 6.65  | 6.90  | 6.48  |
| TC0201336 | --- | 0.000124 | 4 | 3.82  | 3.29  | 3.35  | 3.29  | 3.37  | 3.39  | 3.20  | 3.26  |
| TC0501190 | --- | 0.000125 | 4 | 2.84  | 2.56  | 2.48  | 2.28  | 2.47  | 2.54  | 2.49  | 2.42  |
| TC0102550 | --- | 0.000127 | 4 | 6.76  | 6.68  | 6.35  | 6.14  | 6.21  | 6.59  | 6.60  | 6.50  |
| TC0501265 | --- | 0.000128 | 4 | 4.93  | 4.17  | 4.32  | 4.39  | 4.38  | 4.31  | 4.27  | 4.15  |
| TC1601014 | --- | 0.000128 | 4 | 7.78  | 6.84  | 7.11  | 7.43  | 7.15  | 7.15  | 7.05  | 7.16  |
| TC1600987 | --- | 0.00013  | 4 | 3.77  | 2.91  | 3.02  | 3.19  | 3.23  | 3.23  | 3.00  | 3.21  |
| TC1901370 | --- | 0.000131 | 4 | 3.33  | 2.80  | 2.79  | 2.86  | 2.62  | 2.84  | 2.93  | 2.94  |
| TC1901098 | --- | 0.000133 | 4 | 6.34  | 5.04  | 4.59  | 4.67  | 4.81  | 4.91  | 5.31  | 4.85  |
| TC0300890 | --- | 0.000133 | 4 | 3.93  | 2.91  | 2.99  | 3.00  | 2.84  | 3.01  | 3.01  | 3.02  |
| TC1101439 | --- | 0.000133 | 4 | 4.30  | 4.05  | 3.86  | 3.82  | 3.97  | 3.92  | 4.03  | 4.05  |
| TC0800090 | --- | 0.00014  | 4 | 5.56  | 4.73  | 4.81  | 4.68  | 4.79  | 4.97  | 4.92  | 4.94  |

|           |     |          |   |       |       |       |       |       |       |       |       |
|-----------|-----|----------|---|-------|-------|-------|-------|-------|-------|-------|-------|
| TC0600166 | --- | 0.000159 | 4 | 2.36  | 1.70  | 1.85  | 1.71  | 1.85  | 1.78  | 1.91  | 1.77  |
| TC1201052 | --- | 0.000159 | 4 | 5.72  | 5.17  | 5.15  | 5.18  | 5.32  | 5.44  | 5.45  | 5.41  |
| TC1600679 | --- | 0.000163 | 4 | 4.67  | 4.23  | 4.03  | 3.93  | 4.15  | 4.18  | 4.04  | 4.07  |
| TC0103078 | --- | 0.000164 | 4 | 5.85  | 5.11  | 4.98  | 5.13  | 5.07  | 5.34  | 5.48  | 5.30  |
| TC1700026 | --- | 0.000166 | 4 | 4.79  | 4.25  | 4.44  | 4.13  | 4.26  | 4.10  | 4.41  | 4.29  |
| TC0601242 | --- | 0.000166 | 4 | 4.49  | 4.09  | 4.15  | 3.95  | 3.96  | 4.07  | 4.04  | 4.06  |
| TC1101269 | --- | 0.000167 | 4 | 2.87  | 2.67  | 2.69  | 2.53  | 2.62  | 2.68  | 2.72  | 2.74  |
| TC0401153 | --- | 0.000168 | 4 | 5.43  | 4.83  | 4.87  | 4.71  | 4.78  | 4.90  | 4.75  | 4.76  |
| TC0X00408 | --- | 0.000173 | 4 | 3.89  | 3.35  | 3.37  | 3.18  | 3.05  | 3.32  | 3.14  | 3.33  |
| TC1200278 | --- | 0.000174 | 4 | 6.27  | 5.57  | 5.70  | 5.68  | 5.56  | 5.70  | 5.63  | 5.58  |
| TC0801053 | --- | 0.000174 | 4 | 4.12  | 3.89  | 3.82  | 3.69  | 3.50  | 3.77  | 3.89  | 3.77  |
| TC0301897 | --- | 0.000177 | 4 | 5.57  | 4.77  | 4.85  | 4.80  | 4.88  | 4.72  | 4.55  | 4.81  |
| TC1201339 | --- | 0.000178 | 4 | 4.04  | 3.38  | 3.51  | 3.40  | 3.42  | 3.50  | 3.53  | 3.67  |
| TC0301901 | --- | 0.000179 | 4 | 11.54 | 11.24 | 11.23 | 11.11 | 11.16 | 11.23 | 11.26 | 11.18 |
| TC0800853 | --- | 0.000184 | 4 | 3.82  | 3.02  | 2.92  | 3.13  | 2.96  | 3.07  | 2.98  | 3.25  |
| TC0500041 | --- | 0.000184 | 4 | 5.53  | 5.13  | 5.12  | 5.13  | 5.12  | 5.18  | 5.09  | 5.23  |
| TC1101090 | --- | 0.000184 | 4 | 4.40  | 4.10  | 3.94  | 3.96  | 3.89  | 3.94  | 3.99  | 3.90  |
| TC1900163 | --- | 0.000187 | 4 | 5.12  | 4.42  | 4.38  | 4.21  | 4.36  | 4.40  | 4.43  | 4.46  |
| TC1200076 | --- | 0.000189 | 4 | 5.57  | 5.13  | 5.07  | 5.08  | 5.08  | 5.12  | 5.11  | 4.93  |
| TC0901089 | --- | 0.000189 | 4 | 4.94  | 4.07  | 4.19  | 4.16  | 4.08  | 4.23  | 4.43  | 4.53  |
| TC1400324 | --- | 0.00019  | 4 | 4.16  | 3.95  | 3.92  | 3.92  | 3.87  | 3.92  | 3.82  | 3.95  |
| TC0102722 | --- | 0.000197 | 4 | 7.58  | 6.78  | 6.53  | 6.86  | 6.63  | 7.00  | 6.80  | 7.00  |
| TC0100658 | --- | 0.0002   | 4 | 3.54  | 3.14  | 3.11  | 3.03  | 2.95  | 2.82  | 3.10  | 3.05  |
| TC0100160 | --- | 0.000201 | 4 | 6.78  | 6.31  | 6.51  | 6.20  | 6.20  | 6.20  | 6.36  | 6.30  |
| TC0900335 | --- | 0.000206 | 4 | 10.54 | 10.31 | 10.33 | 10.28 | 10.34 | 10.31 | 10.25 | 10.29 |
| TC1000466 | --- | 0.000206 | 4 | 3.61  | 3.06  | 3.10  | 3.03  | 2.99  | 3.02  | 3.09  | 3.16  |
| TC0700130 | --- | 0.000209 | 4 | 3.96  | 3.56  | 3.73  | 3.49  | 3.49  | 3.66  | 3.56  | 3.59  |
| TC0300382 | --- | 0.00021  | 4 | 5.74  | 5.32  | 5.31  | 5.35  | 5.36  | 5.35  | 5.30  | 5.45  |
| TC1101663 | --- | 0.000211 | 4 | 5.41  | 4.93  | 4.97  | 4.94  | 5.02  | 4.90  | 4.87  | 5.06  |
| TC0501396 | --- | 0.000213 | 4 | 5.46  | 4.87  | 4.46  | 4.69  | 4.42  | 4.66  | 4.62  | 4.79  |
| TC1800326 | --- | 0.000214 | 4 | 6.69  | 6.50  | 5.86  | 5.85  | 5.76  | 6.11  | 6.39  | 6.30  |
| TC0701454 | --- | 0.000215 | 4 | 5.80  | 5.28  | 5.12  | 5.20  | 5.14  | 5.46  | 5.63  | 5.56  |
| TC1000938 | --- | 0.00022  | 4 | 9.81  | 9.44  | 9.36  | 9.37  | 9.36  | 9.43  | 9.47  | 9.49  |
| TC1700415 | --- | 0.000224 | 4 | 5.71  | 5.24  | 5.25  | 5.31  | 5.32  | 5.42  | 5.38  | 5.56  |



|           |     |          |   |       |      |       |      |      |      |      |      |
|-----------|-----|----------|---|-------|------|-------|------|------|------|------|------|
| TC2100090 | --- | 0.000235 | 4 | 4.28  | 3.94 | 3.98  | 3.79 | 3.87 | 4.11 | 4.04 | 4.05 |
| TC0400344 | --- | 0.000235 | 4 | 5.22  | 4.46 | 4.41  | 4.56 | 4.42 | 4.57 | 4.64 | 4.62 |
| TC0600111 | --- | 0.000236 | 4 | 3.24  | 2.50 | 2.91  | 2.44 | 2.71 | 2.63 | 2.60 | 2.61 |
| TC0201913 | --- | 0.000243 | 4 | 4.23  | 3.99 | 4.01  | 3.96 | 4.00 | 3.98 | 3.97 | 4.01 |
| TC1700469 | --- | 0.000248 | 4 | 4.13  | 3.40 | 3.36  | 3.46 | 3.36 | 3.54 | 3.62 | 3.63 |
| TC1701040 | --- | 0.000254 | 4 | 3.86  | 2.91 | 2.78  | 3.08 | 3.12 | 3.24 | 3.18 | 3.28 |
| TC1700978 | --- | 0.000259 | 4 | 6.21  | 5.80 | 5.71  | 5.87 | 5.76 | 5.64 | 5.71 | 5.53 |
| TC1900659 | --- | 0.000263 | 4 | 6.11  | 5.39 | 5.20  | 4.99 | 5.17 | 5.66 | 5.75 | 5.88 |
| TC1200125 | --- | 0.000264 | 4 | 4.14  | 3.77 | 3.76  | 3.74 | 3.72 | 3.73 | 3.76 | 3.75 |
| TC0400547 | --- | 0.000265 | 4 | 8.31  | 7.74 | 7.20  | 7.22 | 7.20 | 7.30 | 7.34 | 7.33 |
| TC1000004 | --- | 0.000266 | 4 | 6.53  | 6.40 | 5.75  | 5.86 | 5.84 | 6.00 | 5.94 | 5.92 |
| TC0200757 | --- | 0.000266 | 4 | 3.04  | 2.74 | 2.49  | 2.28 | 2.16 | 2.41 | 2.55 | 2.35 |
| TC1300477 | --- | 0.000266 | 4 | 5.10  | 4.10 | 4.16  | 4.38 | 4.31 | 4.48 | 4.32 | 4.44 |
| TC0700902 | --- | 0.000272 | 4 | 4.63  | 3.50 | 3.23  | 3.14 | 3.08 | 3.44 | 3.26 | 3.50 |
| TC0400016 | --- | 0.000273 | 4 | 4.93  | 4.68 | 4.60  | 4.58 | 4.64 | 4.63 | 4.71 | 4.65 |
| TC0401041 | --- | 0.000274 | 4 | 9.67  | 9.17 | 9.14  | 9.08 | 9.13 | 9.18 | 9.25 | 9.13 |
| TC0X01159 | --- | 0.000275 | 4 | 8.07  | 7.29 | 7.09  | 7.24 | 7.39 | 7.44 | 7.53 | 7.39 |
| TC0900220 | --- | 0.000276 | 4 | 3.97  | 3.55 | 3.54  | 3.51 | 3.54 | 3.52 | 3.55 | 3.54 |
| TC0300614 | --- | 0.000277 | 4 | 4.27  | 4.01 | 3.96  | 4.00 | 3.92 | 3.90 | 3.90 | 3.98 |
| TC0601360 | --- | 0.00028  | 4 | 4.23  | 3.74 | 3.75  | 3.63 | 3.85 | 3.88 | 4.00 | 3.91 |
| TC1201580 | --- | 0.000281 | 4 | 5.82  | 5.20 | 5.06  | 5.31 | 5.30 | 5.20 | 5.37 | 5.30 |
| TC1400212 | --- | 0.000283 | 4 | 4.05  | 3.42 | 3.41  | 3.37 | 3.17 | 3.38 | 3.62 | 3.69 |
| TC0103422 | --- | 0.000285 | 4 | 3.70  | 3.43 | 2.99  | 3.13 | 2.88 | 3.04 | 3.05 | 3.03 |
| TC2200229 | --- | 0.000286 | 4 | 4.70  | 4.02 | 4.07  | 3.99 | 3.94 | 4.18 | 4.14 | 4.02 |
| TC1000999 | --- | 0.000287 | 4 | 3.86  | 3.38 | 3.51  | 3.29 | 3.50 | 3.23 | 3.32 | 3.37 |
| TC0700694 | --- | 0.000291 | 4 | 5.55  | 4.81 | 4.71  | 4.71 | 4.79 | 4.96 | 4.83 | 4.99 |
| TC2200398 | --- | 0.000292 | 4 | 3.33  | 3.14 | 3.17  | 3.09 | 3.15 | 3.08 | 3.10 | 3.16 |
| TC1901631 | --- | 0.000304 | 4 | 4.39  | 3.75 | 3.58  | 3.64 | 3.66 | 3.91 | 4.08 | 3.86 |
| TC0X00217 | --- | 0.000305 | 4 | 4.71  | 4.32 | 4.26  | 4.09 | 4.28 | 4.23 | 4.20 | 4.37 |
| TC0102144 | --- | 0.000311 | 4 | 10.32 | 9.91 | 10.02 | 9.88 | 9.93 | 9.97 | 9.91 | 9.91 |
| TC1500035 | --- | 0.000312 | 4 | 5.52  | 4.86 | 4.89  | 4.78 | 4.88 | 4.76 | 4.66 | 4.83 |
| TC0201515 | --- | 0.000312 | 4 | 4.62  | 3.96 | 4.08  | 4.11 | 4.20 | 4.07 | 4.20 | 4.28 |
| TC1600192 | --- | 0.000313 | 4 | 3.56  | 3.00 | 3.04  | 2.96 | 2.98 | 3.06 | 3.15 | 3.02 |
| TC1001104 | --- | 0.000325 | 4 | 6.86  | 6.46 | 6.32  | 6.10 | 6.14 | 6.30 | 6.31 | 6.06 |

|           |     |          |   |       |       |       |       |       |       |       |       |
|-----------|-----|----------|---|-------|-------|-------|-------|-------|-------|-------|-------|
| TC1000291 | --- | 0.000327 | 4 | 5.72  | 4.95  | 4.86  | 4.77  | 4.81  | 4.93  | 4.83  | 5.00  |
| TC1400854 | --- | 0.000335 | 4 | 10.26 | 10.00 | 10.04 | 9.91  | 9.99  | 9.98  | 9.96  | 9.95  |
| TC1101369 | --- | 0.000335 | 4 | 3.04  | 2.49  | 2.60  | 2.47  | 2.46  | 2.50  | 2.52  | 2.61  |
| TC0200007 | --- | 0.000335 | 4 | 4.74  | 4.12  | 4.12  | 4.13  | 4.00  | 4.14  | 3.99  | 4.09  |
| TC1700412 | --- | 0.00034  | 4 | 4.00  | 3.70  | 3.75  | 3.68  | 3.74  | 3.76  | 3.63  | 3.73  |
| TC1200043 | --- | 0.000341 | 4 | 3.62  | 3.21  | 3.24  | 3.21  | 3.25  | 3.26  | 3.18  | 3.21  |
| TC0901083 | --- | 0.000341 | 4 | 5.69  | 4.94  | 4.79  | 4.80  | 4.86  | 5.09  | 5.10  | 5.13  |
| TC1200815 | --- | 0.000342 | 4 | 3.99  | 3.54  | 3.63  | 3.51  | 3.56  | 3.55  | 3.57  | 3.58  |
| TC2000176 | --- | 0.000353 | 4 | 4.39  | 3.52  | 3.59  | 3.61  | 3.48  | 3.51  | 3.60  | 3.72  |
| TC1101275 | --- | 0.000354 | 4 | 3.81  | 3.41  | 3.49  | 3.39  | 3.40  | 3.48  | 3.48  | 3.62  |
| TC1001320 | --- | 0.000355 | 4 | 4.75  | 4.49  | 4.50  | 4.48  | 4.48  | 4.48  | 4.39  | 4.44  |
| TC1701157 | --- | 0.000355 | 4 | 9.16  | 8.78  | 8.83  | 8.65  | 8.82  | 8.88  | 8.81  | 8.86  |
| TC0300043 | --- | 0.000356 | 4 | 4.70  | 4.08  | 4.09  | 3.85  | 3.92  | 4.05  | 4.20  | 4.22  |
| TC1201533 | --- | 0.000364 | 4 | 3.93  | 3.36  | 3.62  | 3.30  | 3.25  | 3.27  | 3.35  | 3.52  |
| TC1000125 | --- | 0.000369 | 4 | 6.80  | 6.29  | 6.14  | 5.93  | 5.88  | 5.97  | 6.17  | 6.04  |
| TC0X01174 | --- | 0.000375 | 4 | 7.01  | 6.44  | 6.21  | 6.30  | 6.27  | 6.49  | 6.62  | 6.48  |
| TC1701295 | --- | 0.000386 | 4 | 6.29  | 5.54  | 5.43  | 5.56  | 5.36  | 5.75  | 5.80  | 5.64  |
| TC1500746 | --- | 0.000386 | 4 | 5.50  | 4.97  | 4.97  | 4.94  | 5.03  | 4.95  | 4.90  | 5.02  |
| TC0300125 | --- | 0.000386 | 4 | 4.25  | 3.86  | 3.77  | 3.60  | 3.62  | 3.60  | 3.67  | 3.68  |
| TC0701136 | --- | 0.000391 | 4 | 5.06  | 4.44  | 4.35  | 4.09  | 4.22  | 4.22  | 4.29  | 4.30  |
| TC0301528 | --- | 0.0004   | 4 | 5.53  | 5.20  | 5.14  | 5.11  | 5.10  | 5.18  | 5.16  | 5.16  |
| TC0101977 | --- | 0.000401 | 4 | 11.11 | 10.87 | 10.87 | 10.83 | 10.87 | 10.91 | 10.80 | 10.85 |
| TC0901214 | --- | 0.000402 | 4 | 8.51  | 8.13  | 8.07  | 8.01  | 8.06  | 8.19  | 8.20  | 8.13  |
| TC0401213 | --- | 0.000406 | 4 | 2.53  | 2.33  | 2.34  | 2.24  | 2.37  | 2.33  | 2.29  | 2.34  |
| TC1400121 | --- | 0.000406 | 4 | 5.39  | 4.63  | 4.25  | 4.42  | 4.34  | 4.66  | 4.76  | 4.64  |
| TC0202169 | --- | 0.000409 | 4 | 5.13  | 4.76  | 4.57  | 4.53  | 4.56  | 4.83  | 4.86  | 4.79  |
| TC0X01110 | --- | 0.000409 | 4 | 4.35  | 3.51  | 3.86  | 3.66  | 3.72  | 3.52  | 3.74  | 3.71  |
| TC1100642 | --- | 0.000415 | 4 | 4.96  | 4.66  | 4.63  | 4.65  | 4.60  | 4.53  | 4.58  | 4.53  |
| TC2200025 | --- | 0.000421 | 4 | 5.34  | 4.79  | 4.78  | 4.73  | 4.65  | 4.80  | 5.09  | 4.97  |
| TC1700653 | --- | 0.000435 | 4 | 8.00  | 7.56  | 7.16  | 7.08  | 6.99  | 7.36  | 7.34  | 7.28  |
| TC1100762 | --- | 0.000436 | 4 | 3.70  | 3.31  | 3.27  | 3.14  | 3.24  | 3.25  | 3.18  | 3.29  |
| TC1701552 | --- | 0.000437 | 4 | 6.14  | 5.01  | 5.10  | 5.03  | 5.19  | 5.51  | 5.65  | 5.44  |
| TC1200321 | --- | 0.000443 | 4 | 11.02 | 10.71 | 10.71 | 10.69 | 10.76 | 10.73 | 10.60 | 10.67 |
| TC0201463 | --- | 0.000448 | 4 | 3.95  | 3.53  | 3.61  | 3.50  | 3.86  | 3.71  | 3.73  | 3.70  |

|           |     |          |   |       |       |       |       |       |       |       |       |
|-----------|-----|----------|---|-------|-------|-------|-------|-------|-------|-------|-------|
| TC1701583 | --- | 0.000453 | 4 | 3.65  | 3.12  | 3.18  | 3.31  | 3.31  | 3.21  | 3.43  | 3.38  |
| TC1600164 | --- | 0.00046  | 4 | 6.68  | 6.39  | 6.15  | 6.21  | 6.24  | 6.39  | 6.28  | 6.30  |
| TC1100750 | --- | 0.000466 | 4 | 3.79  | 2.56  | 2.85  | 2.67  | 2.67  | 2.78  | 3.02  | 2.95  |
| TC0600563 | --- | 0.000468 | 4 | 5.27  | 4.70  | 4.61  | 4.70  | 4.90  | 4.91  | 5.02  | 4.86  |
| TC0400384 | --- | 0.000474 | 4 | 3.42  | 3.11  | 3.08  | 3.04  | 3.24  | 3.15  | 3.19  | 3.33  |
| TC0600123 | --- | 0.000474 | 4 | 5.06  | 4.55  | 4.80  | 4.49  | 4.58  | 4.69  | 4.55  | 4.68  |
| TC0301899 | --- | 0.000474 | 4 | 3.24  | 2.94  | 2.97  | 2.90  | 2.93  | 2.78  | 2.90  | 2.97  |
| TC1601136 | --- | 0.000474 | 4 | 10.27 | 9.95  | 9.96  | 9.90  | 10.01 | 9.99  | 9.90  | 9.95  |
| TC2200755 | --- | 0.000483 | 4 | 4.66  | 4.05  | 4.17  | 4.19  | 4.29  | 4.37  | 4.37  | 4.34  |
| TC0Y00043 | --- | 0.000489 | 4 | 2.79  | 2.56  | 2.53  | 2.43  | 2.45  | 2.58  | 2.51  | 2.55  |
| TC1700910 | --- | 0.00049  | 4 | 4.38  | 4.08  | 4.08  | 4.20  | 4.11  | 4.11  | 3.96  | 4.19  |
| TC0900302 | --- | 0.00049  | 4 | 2.63  | 2.30  | 2.26  | 2.10  | 2.07  | 2.22  | 2.16  | 2.42  |
| TC0X01337 | --- | 0.000498 | 4 | 4.80  | 4.31  | 4.27  | 4.20  | 4.17  | 4.17  | 4.26  | 4.26  |
| TC1400059 | --- | 0.000503 | 4 | 4.28  | 3.81  | 3.89  | 3.78  | 3.79  | 3.80  | 3.79  | 3.75  |
| TC1500331 | --- | 0.000505 | 4 | 10.69 | 10.44 | 10.45 | 10.41 | 10.48 | 10.50 | 10.40 | 10.46 |
| TC1000059 | --- | 0.000512 | 4 | 4.25  | 3.40  | 3.25  | 3.06  | 2.82  | 3.21  | 3.22  | 3.48  |
| TC0500159 | --- | 0.000513 | 4 | 9.79  | 9.43  | 9.52  | 9.43  | 9.47  | 9.54  | 9.47  | 9.52  |
| TC0600026 | --- | 0.000513 | 4 | 6.67  | 5.90  | 6.06  | 5.96  | 6.11  | 5.82  | 5.71  | 6.00  |
| TC1901376 | --- | 0.00052  | 4 | 4.54  | 3.98  | 4.05  | 3.80  | 4.04  | 3.88  | 3.88  | 3.98  |
| TC0801239 | --- | 0.00052  | 4 | 3.34  | 2.83  | 2.76  | 2.86  | 2.82  | 2.86  | 2.98  | 2.86  |
| TC0800283 | --- | 0.000522 | 4 | 3.57  | 3.13  | 3.39  | 3.20  | 3.11  | 3.24  | 3.24  | 3.33  |
| TC1100879 | --- | 0.000524 | 4 | 4.33  | 3.88  | 3.96  | 3.93  | 3.90  | 3.88  | 4.01  | 3.98  |
| TC1201198 | --- | 0.000526 | 4 | 12.66 | 12.49 | 12.48 | 12.47 | 12.49 | 12.47 | 12.41 | 12.47 |
| TC1100336 | --- | 0.000527 | 4 | 3.73  | 3.47  | 3.49  | 3.40  | 3.49  | 3.45  | 3.40  | 3.39  |
| TC1201487 | --- | 0.000532 | 4 | 3.53  | 3.17  | 3.19  | 3.10  | 3.25  | 3.27  | 3.15  | 3.25  |
| TC1300258 | --- | 0.000538 | 4 | 9.71  | 9.35  | 9.49  | 9.37  | 9.40  | 9.50  | 9.49  | 9.41  |
| TC0102624 | --- | 0.000551 | 4 | 4.37  | 3.28  | 3.16  | 3.15  | 3.34  | 3.87  | 3.31  | 3.70  |
| TC0X00655 | --- | 0.000578 | 4 | 3.01  | 2.74  | 2.68  | 2.66  | 2.64  | 2.62  | 2.68  | 2.69  |
| TC2000731 | --- | 0.000585 | 4 | 3.87  | 3.29  | 3.32  | 3.34  | 3.26  | 3.33  | 3.21  | 3.29  |
| TC1800271 | --- | 0.000602 | 4 | 4.01  | 3.46  | 3.40  | 3.54  | 3.45  | 3.52  | 3.65  | 3.52  |
| TC0500371 | --- | 0.000604 | 4 | 4.09  | 3.52  | 3.60  | 3.32  | 3.48  | 3.59  | 3.67  | 3.55  |
| TC0102511 | --- | 0.000606 | 4 | 12.07 | 11.81 | 11.83 | 11.79 | 11.80 | 11.85 | 11.86 | 11.81 |
| TC1401132 | --- | 0.000616 | 4 | 4.90  | 4.68  | 4.69  | 4.62  | 4.67  | 4.61  | 4.65  | 4.64  |
| TC1601305 | --- | 0.000617 | 4 | 5.92  | 5.38  | 5.38  | 5.33  | 5.30  | 5.40  | 5.52  | 5.39  |

|            |     |          |   |       |       |       |       |       |       |       |       |
|------------|-----|----------|---|-------|-------|-------|-------|-------|-------|-------|-------|
| TC0101241  | --- | 0.000625 | 4 | 3.95  | 3.64  | 3.66  | 3.61  | 3.64  | 3.66  | 3.53  | 3.58  |
| TC0300340  | --- | 0.000626 | 4 | 9.59  | 9.31  | 9.32  | 9.25  | 9.32  | 9.35  | 9.27  | 9.32  |
| TC0201494  | --- | 0.00063  | 4 | 4.37  | 4.29  | 4.21  | 4.11  | 4.21  | 4.24  | 4.22  | 4.23  |
| TC1100787  | --- | 0.000631 | 4 | 3.55  | 3.20  | 3.17  | 3.26  | 3.01  | 3.17  | 3.25  | 3.25  |
| TC0300864  | --- | 0.000631 | 4 | 3.35  | 2.89  | 3.01  | 2.92  | 2.89  | 2.92  | 2.85  | 2.99  |
| TC0101751  | --- | 0.000635 | 4 | 7.43  | 7.06  | 7.13  | 7.02  | 7.02  | 7.01  | 7.00  | 7.00  |
| TC0901142  | --- | 0.000638 | 4 | 4.88  | 4.69  | 4.69  | 4.62  | 4.65  | 4.73  | 4.67  | 4.73  |
| TC1500700  | --- | 0.00064  | 4 | 3.29  | 2.76  | 2.65  | 2.75  | 2.78  | 2.82  | 2.85  | 2.84  |
| TC1500453  | --- | 0.00064  | 4 | 3.29  | 3.07  | 3.15  | 3.13  | 3.16  | 3.15  | 3.11  | 3.13  |
| TC0600647  | --- | 0.000641 | 4 | 4.76  | 4.57  | 4.59  | 4.54  | 4.59  | 4.60  | 4.78  | 4.60  |
| TC0600642  | --- | 0.000645 | 4 | 3.22  | 2.52  | 2.71  | 2.65  | 2.70  | 2.82  | 2.91  | 2.70  |
| TC2100204  | --- | 0.000653 | 4 | 4.80  | 4.42  | 4.34  | 4.36  | 4.24  | 4.46  | 4.53  | 4.50  |
| TC0500964  | --- | 0.000661 | 4 | 3.22  | 2.69  | 2.78  | 2.75  | 2.79  | 2.53  | 2.46  | 2.86  |
| TC1300222  | --- | 0.000662 | 4 | 10.08 | 9.63  | 9.58  | 9.55  | 9.57  | 9.64  | 9.68  | 9.58  |
| TC0201774  | --- | 0.000664 | 4 | 4.53  | 3.97  | 3.77  | 3.77  | 3.68  | 3.99  | 3.99  | 3.94  |
| TC1100070  | --- | 0.000665 | 4 | 5.50  | 5.57  | 5.12  | 5.05  | 5.16  | 5.42  | 5.53  | 5.40  |
| TC2000252  | --- | 0.00067  | 4 | 10.87 | 10.64 | 10.76 | 10.63 | 10.69 | 10.74 | 10.63 | 10.65 |
| TC1000221  | --- | 0.000679 | 4 | 4.91  | 4.42  | 4.41  | 4.58  | 4.47  | 4.39  | 4.51  | 4.58  |
| TC0Xr00013 | --- | 0.000698 | 4 | 7.52  | 6.95  | 7.35  | 7.29  | 7.03  | 7.32  | 7.27  | 7.45  |
| TC1901523  | --- | 0.000714 | 4 | 10.32 | 10.14 | 10.09 | 10.00 | 10.11 | 10.12 | 10.00 | 10.07 |
| TC1000839  | --- | 0.000717 | 4 | 9.95  | 9.57  | 9.57  | 9.51  | 9.62  | 9.66  | 9.54  | 9.58  |
| TC1200580  | --- | 0.000718 | 4 | 2.89  | 2.50  | 2.46  | 2.61  | 2.29  | 2.38  | 2.36  | 2.40  |
| TC0901114  | --- | 0.000726 | 4 | 6.76  | 6.37  | 6.37  | 6.41  | 6.36  | 6.40  | 6.28  | 6.34  |
| TC0201280  | --- | 0.000733 | 4 | 8.18  | 7.82  | 7.95  | 7.80  | 7.94  | 8.00  | 7.90  | 7.90  |
| TC0600870  | --- | 0.000735 | 4 | 7.06  | 6.68  | 6.72  | 6.64  | 6.78  | 6.71  | 6.59  | 6.74  |
| TC1100818  | --- | 0.000736 | 4 | 11.19 | 10.93 | 10.95 | 10.88 | 10.97 | 10.97 | 10.83 | 10.92 |
| TC0202213  | --- | 0.000738 | 4 | 6.95  | 5.85  | 5.55  | 5.84  | 5.66  | 6.09  | 6.10  | 5.95  |
| TC0600034  | --- | 0.00074  | 4 | 12.09 | 11.92 | 11.92 | 11.90 | 11.96 | 11.94 | 11.89 | 11.94 |
| TC0101597  | --- | 0.00074  | 4 | 2.96  | 2.58  | 2.59  | 2.51  | 2.62  | 2.56  | 2.41  | 2.49  |
| TC0500895  | --- | 0.00075  | 4 | 2.95  | 2.40  | 2.47  | 2.41  | 2.46  | 2.23  | 2.42  | 2.47  |
| TC0300227  | --- | 0.000752 | 4 | 5.20  | 4.31  | 4.38  | 4.43  | 4.73  | 4.63  | 4.54  | 4.62  |
| TC0500994  | --- | 0.000755 | 4 | 3.20  | 2.64  | 2.80  | 3.26  | 2.89  | 2.95  | 2.72  | 2.75  |
| TC0700189  | --- | 0.000756 | 4 | 6.65  | 5.57  | 5.36  | 5.58  | 5.97  | 5.90  | 6.01  | 5.85  |
| TC0202219  | --- | 0.000756 | 4 | 10.71 | 10.35 | 10.42 | 10.26 | 10.42 | 10.38 | 10.32 | 10.33 |

|            |     |          |   |       |       |       |       |       |       |       |       |
|------------|-----|----------|---|-------|-------|-------|-------|-------|-------|-------|-------|
| TC0401431  | --- | 0.000766 | 4 | 10.33 | 10.07 | 10.05 | 9.93  | 10.01 | 10.01 | 10.01 | 9.96  |
| TC0601456  | --- | 0.000769 | 4 | 11.38 | 11.10 | 11.13 | 11.04 | 11.11 | 11.14 | 11.04 | 11.10 |
| TC1200655  | --- | 0.000776 | 4 | 2.56  | 2.16  | 2.13  | 2.01  | 2.06  | 1.92  | 2.11  | 1.97  |
| TC2000218  | --- | 0.000777 | 4 | 5.88  | 4.58  | 4.54  | 4.67  | 4.60  | 5.03  | 5.15  | 5.00  |
| TC1101645  | --- | 0.000784 | 4 | 4.96  | 4.34  | 4.21  | 4.55  | 4.32  | 4.53  | 4.76  | 4.64  |
| TC0800577  | --- | 0.000791 | 4 | 3.69  | 3.37  | 3.22  | 3.28  | 3.34  | 3.22  | 3.35  | 3.25  |
| TC1600866  | --- | 0.000792 | 4 | 11.51 | 11.23 | 11.19 | 11.17 | 11.28 | 11.23 | 11.10 | 11.20 |
| TC1101066  | --- | 0.000796 | 4 | 5.47  | 5.17  | 5.03  | 5.17  | 5.38  | 5.09  | 5.01  | 5.20  |
| TC1500905  | --- | 0.000796 | 4 | 12.25 | 12.11 | 12.11 | 12.01 | 12.10 | 12.14 | 12.05 | 12.13 |
| TC1100819  | --- | 0.000801 | 4 | 10.38 | 10.03 | 10.17 | 10.00 | 10.06 | 10.13 | 10.06 | 10.01 |
| TC1600855  | --- | 0.000801 | 4 | 5.00  | 4.63  | 4.61  | 4.55  | 4.55  | 4.67  | 4.56  | 4.59  |
| TC1901521  | --- | 0.000804 | 4 | 4.17  | 3.57  | 3.48  | 3.69  | 3.63  | 3.63  | 3.51  | 3.52  |
| TC1600397  | --- | 0.000808 | 4 | 6.21  | 5.89  | 5.73  | 5.74  | 5.85  | 5.82  | 5.73  | 5.87  |
| TC1901341  | --- | 0.000822 | 4 | 4.28  | 3.96  | 3.94  | 3.96  | 3.98  | 3.99  | 3.92  | 3.95  |
| TC0601705  | --- | 0.000824 | 4 | 3.27  | 2.65  | 2.84  | 2.95  | 2.92  | 3.04  | 2.98  | 3.08  |
| TC1001019  | --- | 0.000826 | 4 | 7.52  | 7.07  | 7.06  | 6.98  | 7.03  | 7.15  | 7.20  | 7.11  |
| TC2000810  | --- | 0.000838 | 4 | 4.28  | 3.57  | 3.41  | 3.22  | 3.46  | 3.59  | 3.67  | 3.73  |
| TC0701111  | --- | 0.000848 | 4 | 10.89 | 10.57 | 10.64 | 10.52 | 10.57 | 10.62 | 10.55 | 10.59 |
| TC0700571  | --- | 0.000853 | 4 | 11.88 | 11.71 | 11.69 | 11.69 | 11.69 | 11.71 | 11.67 | 11.71 |
| TC0X00249  | --- | 0.000853 | 4 | 3.21  | 2.95  | 2.81  | 2.89  | 2.94  | 2.71  | 2.92  | 2.73  |
| TC1700970  | --- | 0.000854 | 4 | 4.38  | 4.23  | 3.95  | 3.83  | 3.88  | 3.95  | 4.20  | 4.08  |
| TC0Xr00012 | --- | 0.000856 | 4 | 5.30  | 4.82  | 5.00  | 4.83  | 4.59  | 4.86  | 5.12  | 5.04  |
| TC1200227  | --- | 0.000856 | 4 | 3.19  | 2.86  | 3.12  | 2.92  | 2.90  | 2.99  | 2.98  | 2.96  |
| TC1300251  | --- | 0.000861 | 4 | 4.73  | 4.07  | 4.41  | 4.29  | 4.02  | 4.22  | 4.20  | 4.46  |
| TC1600545  | --- | 0.000868 | 4 | 3.26  | 2.77  | 2.90  | 2.78  | 2.89  | 2.75  | 2.67  | 2.79  |
| TC1200473  | --- | 0.000872 | 4 | 6.65  | 6.06  | 6.20  | 6.13  | 6.17  | 5.98  | 5.97  | 6.05  |
| TC1201202  | --- | 0.000875 | 4 | 3.97  | 2.89  | 2.90  | 2.63  | 2.72  | 2.72  | 2.92  | 2.86  |
| TC1101656  | --- | 0.000878 | 4 | 5.16  | 4.65  | 4.51  | 4.50  | 4.26  | 4.54  | 4.44  | 4.53  |
| TC1400262  | --- | 0.00089  | 4 | 6.02  | 5.52  | 5.71  | 5.65  | 5.51  | 5.73  | 5.92  | 5.78  |
| TC1701683  | --- | 0.000892 | 4 | 6.57  | 6.17  | 6.12  | 6.26  | 6.23  | 6.20  | 6.21  | 6.28  |
| TC0400993  | --- | 0.000899 | 4 | 3.02  | 2.56  | 2.59  | 2.45  | 2.46  | 2.36  | 2.51  | 2.60  |
| TC0201076  | --- | 0.000905 | 4 | 4.58  | 3.87  | 3.99  | 4.06  | 3.92  | 3.88  | 4.02  | 4.00  |
| TC1800053  | --- | 0.000916 | 4 | 3.24  | 2.92  | 2.91  | 2.88  | 2.74  | 2.92  | 2.80  | 2.89  |
| TC1500939  | --- | 0.000923 | 4 | 4.59  | 3.94  | 3.89  | 3.76  | 3.88  | 3.85  | 4.12  | 4.05  |

|           |          |                                                |          |   |      |      |      |      |      |      |      |      |
|-----------|----------|------------------------------------------------|----------|---|------|------|------|------|------|------|------|------|
| TC0200609 | ---      |                                                | 0.000932 | 4 | 4.38 | 3.81 | 3.64 | 3.95 | 3.81 | 3.91 | 3.79 | 3.81 |
| TC1000039 | ---      |                                                | 0.000954 | 4 | 3.56 | 3.20 | 3.16 | 3.18 | 3.32 | 3.22 | 3.49 | 3.11 |
| TC0300917 | ---      |                                                | 0.000979 | 4 | 8.30 | 7.75 | 7.64 | 7.77 | 8.11 | 8.07 | 8.12 | 7.65 |
| TC2200006 | ---      |                                                | 0.000993 | 4 | 4.48 | 4.14 | 4.15 | 4.04 | 3.98 | 4.16 | 4.10 | 4.12 |
| TC1900672 | ---      |                                                | 0.000994 | 4 | 4.95 | 4.55 | 4.49 | 4.41 | 4.54 | 4.55 | 4.39 | 4.49 |
| TC0201593 | AAK1     | 22848 AP2 associated kinase 1                  | 0.000111 | 5 | 5.78 | 5.81 | 5.85 | 5.91 | 5.68 | 5.56 | 5.65 | 5.59 |
| TC0202293 | ABCA12   | 26154 ATP-binding cassette, sub-family A (AB   | 0.000455 | 5 | 2.25 | 2.24 | 2.30 | 2.19 | 2.21 | 2.20 | 2.21 | 2.20 |
| TC1701649 | ABCA5    | 23461 ATP-binding cassette, sub-family A (AB   | 0.000184 | 5 | 3.17 | 3.16 | 3.09 | 2.84 | 2.86 | 2.96 | 3.00 | 2.93 |
| TC1701646 | ABCA9    | 10350 ATP-binding cassette, sub-family A (AB   | 0.000563 | 5 | 2.42 | 2.31 | 2.38 | 2.27 | 2.30 | 2.29 | 2.26 | 2.31 |
| TC0701397 | ABCB1    | 5243 ATP-binding cassette, sub-family B (MD    | 0.00077  | 5 | 2.96 | 2.91 | 2.95 | 2.86 | 2.88 | 2.84 | 2.86 | 2.90 |
| TC1601083 | ABCC11   | 85320 ATP-binding cassette, sub-family C (CFT  | 2.57E-06 | 5 | 3.75 | 3.73 | 3.74 | 3.64 | 3.65 | 3.63 | 3.60 | 3.64 |
| TC1601082 | ABCC12   | 94160 ATP-binding cassette, sub-family C (CFT  | 3.55E-05 | 5 | 3.23 | 3.22 | 3.28 | 3.17 | 3.17 | 3.18 | 3.11 | 3.20 |
| TC1100915 | ABCG4    | 64137 ATP-binding cassette, sub-family G (WF   | 0.00025  | 5 | 4.05 | 4.01 | 4.03 | 3.93 | 3.96 | 3.96 | 3.83 | 3.95 |
| TC0801190 | ABRA     | 137735 actin-binding Rho activating protein    | 0.000655 | 5 | 3.63 | 3.65 | 3.77 | 3.64 | 3.51 | 3.48 | 3.41 | 3.48 |
| TC0X00785 | ACE2     | 59272 angiotensin I converting enzyme (pepti   | 0.000254 | 5 | 2.39 | 2.44 | 2.47 | 2.34 | 2.39 | 2.34 | 2.30 | 2.33 |
| TC0301298 | ACOX2    | 8309 acyl-Coenzyme A oxidase 2, branched c     | 0.000976 | 5 | 3.92 | 3.79 | 3.75 | 3.72 | 3.74 | 3.72 | 3.68 | 3.75 |
| TC1900112 | ACSBG2   | 81616 acyl-CoA synthetase bubblegum family     | 1.33E-05 | 5 | 3.20 | 3.01 | 3.01 | 2.96 | 2.98 | 2.97 | 2.88 | 2.98 |
| TC1600232 | ACSM2A   | 123876 acyl-CoA synthetase medium-chain farr   | 3.96E-05 | 5 | 3.09 | 2.96 | 2.97 | 2.91 | 2.91 | 2.89 | 2.91 | 2.94 |
| TC1600919 | ACSM2B   | 648338 // acyl-CoA synthetase medium-chain far | 1.41E-06 | 5 | 3.80 | 3.67 | 3.73 | 3.63 | 3.65 | 3.66 | 3.59 | 3.64 |
| TC0101643 | ACTN2    | 88 actinin, alpha 2                            | 0.00057  | 5 | 2.68 | 2.66 | 2.75 | 2.66 | 2.62 | 2.63 | 2.60 | 2.64 |
| TC0800893 | ADAM2    | 2515 ADAM metalloproteinase domain 2 (fert     | 0.000315 | 5 | 2.16 | 2.15 | 2.19 | 2.08 | 2.07 | 2.04 | 2.08 | 2.12 |
| TC2100252 | ADAMTS1  | 9510 ADAM metalloproteinase with thrombo       | 0.000197 | 5 | 3.51 | 3.54 | 3.56 | 3.45 | 3.43 | 3.43 | 3.36 | 3.45 |
| TC1501270 | ADAMTS17 | 170691 ADAM metalloproteinase with thrombo     | 0.000813 | 5 | 3.98 | 3.87 | 3.90 | 3.84 | 3.89 | 3.79 | 3.77 | 3.84 |
| TC2100253 | ADAMTS5  | 11096 ADAM metalloproteinase with thrombo      | 0.000293 | 5 | 3.38 | 3.29 | 3.31 | 3.19 | 3.19 | 3.18 | 3.19 | 3.26 |
| TC1501147 | ADAMTS7  | 11173 ADAM metalloproteinase with thrombo      | 0.000481 | 5 | 4.90 | 4.86 | 4.88 | 4.78 | 4.83 | 4.81 | 4.73 | 4.77 |
| TC1500574 | ADAMTSL3 | 57188 ADAMTS-like 3 /// ADAMTS-like proteir    | 5.24E-05 | 5 | 3.34 | 3.28 | 3.30 | 3.19 | 3.21 | 3.26 | 3.18 | 3.26 |
| TC0301500 | ADCY5    | 111 adenylate cyclase 5                        | 7.79E-06 | 5 | 4.41 | 4.39 | 4.42 | 4.32 | 4.33 | 4.31 | 4.23 | 4.28 |
| TC1201153 | ADCY6    | 112 adenylate cyclase 6                        | 0.000188 | 5 | 3.98 | 4.00 | 4.00 | 3.89 | 3.89 | 3.91 | 3.87 | 3.91 |
| TC0501279 | AFF4     | 27125 AF4/FMR2 family, member 4 /// AF4/FI     | 1.02E-06 | 5 | 6.56 | 6.84 | 6.50 | 6.49 | 6.32 | 6.45 | 6.54 | 6.54 |
| TC1700807 | AFMID    | 125061 arylformamidase                         | 5.18E-05 | 5 | 3.66 | 3.51 | 3.55 | 3.38 | 3.48 | 3.43 | 3.46 | 3.46 |
| TC1500596 | AGBL1    | 731136 // ATP/GTP binding protein-like 1       | 0.000212 | 5 | 3.08 | 2.86 | 2.92 | 2.82 | 2.84 | 2.80 | 2.77 | 2.87 |
| TC0701030 | AGR2     | 10551 anterior gradient homolog 2 (Xenopus     | 0.000105 | 5 | 2.32 | 2.36 | 2.45 | 2.28 | 2.33 | 2.29 | 2.25 | 2.34 |
| TC0501541 | AGXT2L2  | 85007 alanine-glyoxylate aminotransferase 2-   | 2.09E-05 | 5 | 5.47 | 5.30 | 5.22 | 5.17 | 5.24 | 5.21 | 5.19 | 5.09 |
| TC0300872 | AHSG     | 197 alpha-2-HS-glycoprotein                    | 2.68E-06 | 5 | 3.18 | 3.09 | 3.08 | 2.98 | 2.96 | 2.97 | 2.87 | 3.01 |

|           |                |           |                                             |          |   |      |      |      |      |      |      |      |      |
|-----------|----------------|-----------|---------------------------------------------|----------|---|------|------|------|------|------|------|------|------|
| TC0400309 | ALB            | 213       | albumin /// Serum albumin precursor.        | 6.04E-06 | 5 | 2.37 | 2.54 | 2.40 | 2.31 | 2.30 | 2.30 | 2.30 | 2.33 |
| TC0901200 | ALDOB          | 229       | aldolase B, fructose-bisphosphate /// F     | 0.00083  | 5 | 2.82 | 2.85 | 2.83 | 2.76 | 2.74 | 2.76 | 2.71 | 2.75 |
| TC0X00500 | ALG13          | 55849     | Uncharacterized protein CXorf45. [Sou       | 2.20E-12 | 5 | 3.77 | 3.79 | 3.90 | 3.62 | 3.54 | 3.54 | 3.63 | 3.61 |
| TC1000200 | ALOX5          | 240       | arachidonate 5-lipoxygenase                 | 7.59E-10 | 5 | 7.91 | 8.15 | 8.20 | 8.02 | 7.88 | 7.74 | 7.62 | 7.60 |
| TC0103034 | ANGPTL1        | 9068      | angiopoietin-like 1                         | 6.75E-07 | 5 | 3.00 | 3.15 | 2.97 | 2.82 | 2.78 | 2.82 | 2.80 | 2.81 |
| TC0100115 | ANGPTL7        | 10218     | angiopoietin-like 7                         | 3.42E-06 | 5 | 3.76 | 3.51 | 3.60 | 3.45 | 3.58 | 3.38 | 3.34 | 3.49 |
| TC0400471 | ANK2           | 287       | ankyrin 2, neuronal /// Ankyrin-2 (Brair    | 4.30E-05 | 5 | 2.91 | 2.88 | 2.89 | 2.83 | 2.80 | 2.78 | 2.78 | 2.82 |
| TC1000745 | ANKRD16        | 54522     | ankyrin repeat domain 16                    | 7.41E-05 | 5 | 3.84 | 3.89 | 3.95 | 3.83 | 3.87 | 3.84 | 3.73 | 3.81 |
| TC0600326 | ANKS1A         | 23294     | ankyrin repeat and sterile alpha motif c    | 7.65E-06 | 5 | 5.74 | 5.95 | 5.98 | 5.87 | 5.75 | 5.60 | 5.62 | 5.61 |
| TC0401074 | ANTXR2         | 118429    | anthrax toxin receptor 2 /// Anthrax to     | 0.000313 | 5 | 7.41 | 7.72 | 7.39 | 7.38 | 7.37 | 7.46 | 7.47 | 7.48 |
| TC1800392 | AQP4           | 361       | aquaporin 4 /// Aquaporin-4 (AQP-4) (\      | 3.48E-05 | 5 | 2.95 | 2.85 | 2.90 | 2.78 | 2.75 | 2.80 | 2.73 | 2.83 |
| TC0200759 | ARHGAP15       | 55843     | Rho GTPase activating protein 15            | 1.49E-06 | 5 | 8.34 | 8.62 | 8.60 | 8.29 | 8.17 | 8.32 | 8.26 | 8.24 |
| TC0X01373 | ARHGAP4        | 393       | Rho GTPase activating protein 4 /// Rho     | 0.000122 | 5 | 5.91 | 5.84 | 5.82 | 5.80 | 5.77 | 5.69 | 5.65 | 5.68 |
| TC0300141 | ARPP-21 /// AR | 10777     | cyclic AMP-regulated phosphoprotein,        | 2.56E-05 | 5 | 2.77 | 2.64 | 2.67 | 2.58 | 2.63 | 2.57 | 2.59 | 2.62 |
| TC0X00326 | ARR3           | 407       | arrestin 3, retinal (X-arrestin) /// Arrest | 0.000336 | 5 | 3.72 | 3.55 | 3.61 | 3.56 | 3.57 | 3.53 | 3.49 | 3.54 |
| TC0X00738 | ARSE           | 415       | arylsulfatase E (chondrodysplasia punc      | 0.000751 | 5 | 3.48 | 3.54 | 3.59 | 3.43 | 3.48 | 3.49 | 3.40 | 3.48 |
| TC0X00013 | ARSF           | 416       | arylsulfatase F                             | 0.000798 | 5 | 2.88 | 2.78 | 2.82 | 2.72 | 2.76 | 2.73 | 2.66 | 2.74 |
| TC0401419 | ASB5           | 140458    | ankyrin repeat and SOCS box-containin       | 0.000598 | 5 | 2.62 | 2.59 | 2.72 | 2.58 | 2.58 | 2.54 | 2.51 | 2.65 |
| TC0901285 | ASTN2          | 23245     | astrotactin 2 /// astrotactin 2 isoform a   | 6.96E-05 | 5 | 3.75 | 3.72 | 3.74 | 3.62 | 3.68 | 3.68 | 3.63 | 3.69 |
| TC1300287 | ATP11A         | 23250     | ATPase, class VI, type 11A /// Probable     | 2.43E-08 | 5 | 6.82 | 7.04 | 6.76 | 6.62 | 6.52 | 6.46 | 6.45 | 6.49 |
| TC0101187 | ATP1A4         | 480       | ATPase, Na+/K+ transporting, alpha 4 p      | 0.000273 | 5 | 3.24 | 3.26 | 3.28 | 3.19 | 3.18 | 3.16 | 3.12 | 3.17 |
| TC1300666 | ATP4B          | 496       | ATPase, H+/K+ exchanging, beta polype       | 0.000628 | 5 | 3.61 | 3.67 | 3.72 | 3.59 | 3.62 | 3.53 | 3.54 | 3.55 |
| TC0701671 | ATP6V0A4       | 50617     | ATPase, H+ transporting, lysosomal VO       | 0.000932 | 5 | 3.05 | 3.09 | 3.13 | 3.03 | 3.05 | 3.05 | 2.97 | 3.07 |
| TC0103089 | B3GALT2        | 8707      | UDP-Gal:betaGlcNAc beta 1,3-galactosy       | 5.23E-05 | 5 | 3.39 | 3.20 | 3.25 | 3.10 | 3.09 | 3.03 | 2.93 | 2.99 |
| TC0601458 | BACH2          | 60468     | BTB and CNC homology 1, basic leucine       | 0.000141 | 5 | 3.67 | 3.53 | 3.45 | 3.36 | 3.37 | 3.40 | 3.39 | 3.46 |
| TC0601129 | BAT5           | 7920      | HLA-B associated transcript 5               | 0.000387 | 5 | 5.60 | 5.61 | 5.45 | 5.47 | 5.51 | 5.49 | 5.35 | 5.46 |
| TC1100577 | BBS1 /// DPP3  | 10072 /// | dipeptidyl-peptidase 3 /// Bardet-Biedl     | 1.81E-05 | 5 | 4.27 | 4.21 | 4.26 | 4.29 | 4.28 | 4.16 | 4.16 | 4.15 |
| TC0300503 | BOC            | 91653     | Boc homolog (mouse) /// Brother of CC       | 0.000165 | 5 | 4.13 | 4.05 | 4.10 | 4.02 | 4.01 | 3.99 | 3.97 | 4.01 |
| TC0601226 | BTBD9          | 114781    | BTB (POZ) domain containing 9 /// BTB,      | 1.78E-09 | 5 | 4.91 | 5.14 | 5.02 | 4.97 | 4.78 | 4.77 | 4.89 | 4.85 |
| TC0500788 | BTNL3          | 10917     | butyrophilin-like 3 /// Butyrophilin-like   | 2.11E-05 | 5 | 3.66 | 3.46 | 3.44 | 3.29 | 3.29 | 3.27 | 3.21 | 3.28 |
| TC1701551 | BZRAP1         | 9256      | benzodiazapine receptor (peripheral) a      | 0.000959 | 5 | 4.65 | 4.53 | 4.53 | 4.49 | 4.52 | 4.48 | 4.48 | 4.48 |
| TC1000488 | C10orf65       | 112817    | chromosome 10 open reading frame 65         | 0.000196 | 5 | 4.53 | 4.41 | 4.45 | 4.30 | 4.32 | 4.32 | 4.35 | 4.34 |
| TC1100317 | C11orf49       | 79096     | chromosome 11 open reading frame 49         | 7.86E-05 | 5 | 4.40 | 4.33 | 4.47 | 4.46 | 4.41 | 4.33 | 4.27 | 4.29 |
| TC1101808 | C11orf65       | 160140    | chromosome 11 open reading frame 65         | 0.000357 | 5 | 2.95 | 2.94 | 2.87 | 2.80 | 2.83 | 2.81 | 2.81 | 2.83 |

|           |                |                                                          |          |   |      |      |      |      |      |      |      |      |
|-----------|----------------|----------------------------------------------------------|----------|---|------|------|------|------|------|------|------|------|
| TC1201177 | C12orf25       | 84070 chromosome 12 open reading frame 25                | 0.000299 | 5 | 4.06 | 3.96 | 4.00 | 3.91 | 3.91 | 3.92 | 3.79 | 3.92 |
| TC1300462 | C13orf18       | 731930 // chromosome 13 open reading frame 18            | 6.04E-06 | 5 | 6.84 | 7.02 | 6.20 | 6.11 | 6.13 | 6.60 | 6.15 | 6.43 |
| TC1501130 | C15orf5        | --- Uncharacterized protein C15orf5. [Source: Ensembl]   | 0.000304 | 5 | 2.84 | 3.12 | 2.85 | 2.70 | 2.92 | 2.88 | 2.72 | 2.79 |
| TC1701806 | C17orf62       | 79415 chromosome 17 open reading frame 62                | 1.39E-06 | 5 | 6.38 | 6.43 | 6.36 | 6.34 | 6.28 | 6.21 | 6.16 | 6.12 |
| TC1701063 | C17orf76       | 388341 chromosome 17 open reading frame 76               | 6.41E-06 | 5 | 5.23 | 5.36 | 5.09 | 4.99 | 5.05 | 5.22 | 5.15 | 5.18 |
| TC1900502 | C19orf15       | 57828 chromosome 19 open reading frame 15                | 9.54E-05 | 5 | 4.43 | 4.34 | 4.37 | 4.27 | 4.30 | 4.31 | 4.30 | 4.30 |
| TC0102336 | C1orf141       | 400757 chromosome 1 open reading frame 141               | 0.000811 | 5 | 2.15 | 2.07 | 2.08 | 2.02 | 2.08 | 2.01 | 1.97 | 2.02 |
| TC0103147 | C1orf157       | 284573 chromosome 1 open reading frame 157               | 3.17E-05 | 5 | 3.44 | 3.25 | 3.26 | 3.21 | 3.25 | 3.15 | 3.17 | 3.23 |
| TC0101143 | C1orf182       | 128229 chromosome 1 open reading frame 182               | 0.000117 | 5 | 3.26 | 3.25 | 3.25 | 3.11 | 3.15 | 3.13 | 3.19 | 3.12 |
| TC0102853 | C1orf61        | 10485 chromosome 1 open reading frame 61                 | 0.000382 | 5 | 4.10 | 3.97 | 4.00 | 3.87 | 3.90 | 3.91 | 3.92 | 3.92 |
| TC0101568 | C1orf95        | 375057 chromosome 1 open reading frame 95                | 4.80E-05 | 5 | 4.74 | 4.55 | 4.53 | 4.44 | 4.46 | 4.43 | 4.45 | 4.49 |
| TC2000699 | C20orf173      | --- Uncharacterized protein C20orf173. [Source: Ensembl] | 0.000112 | 5 | 4.18 | 4.01 | 4.07 | 3.97 | 4.04 | 3.92 | 3.90 | 4.00 |
| TC0200180 | C2orf56        | 55471 chromosome 2 open reading frame 56                 | 1.30E-20 | 5 | 4.71 | 5.42 | 5.31 | 4.77 | 4.73 | 4.55 | 4.63 | 4.44 |
| TC0300077 | C3orf20        | 84077 chromosome 3 open reading frame 20                 | 0.000541 | 5 | 3.57 | 3.46 | 3.52 | 3.44 | 3.44 | 3.42 | 3.38 | 3.43 |
| TC0301712 | C3orf57 /// Q6 | 165679 chromosome 3 open reading frame 57                | 0.000176 | 5 | 3.43 | 3.35 | 3.39 | 3.22 | 3.38 | 3.23 | 3.22 | 3.25 |
| TC0401082 | C4orf11        | --- ---                                                  | 0.000671 | 5 | 3.02 | 2.84 | 2.80 | 2.73 | 2.86 | 2.82 | 2.67 | 2.76 |
| TC0600787 | C6orf103       | --- Uncharacterized protein C6orf103. [Source: Ensembl]  | 0.00052  | 5 | 2.22 | 2.28 | 2.32 | 2.23 | 2.21 | 2.18 | 2.19 | 2.21 |
| TC0601210 | C6orf222       | 389384 chromosome 6 open reading frame 222               | 0.000494 | 5 | 3.80 | 3.66 | 3.71 | 3.67 | 3.67 | 3.68 | 3.55 | 3.64 |
| TC0701459 | C7orf38        | 221786 chromosome 7 open reading frame 38                | 0.000233 | 5 | 4.80 | 4.94 | 4.97 | 4.73 | 4.72 | 4.80 | 4.89 | 4.93 |
| TC0701495 | C7orf52        | 375607 chromosome 7 open reading frame 52                | 0.000576 | 5 | 4.28 | 4.25 | 4.19 | 4.09 | 4.13 | 4.15 | 4.07 | 4.06 |
| TC0102293 | C8B            | 732 complement component 8, beta polypeptide             | 1.90E-05 | 5 | 2.92 | 2.83 | 3.04 | 2.83 | 2.82 | 2.84 | 2.77 | 2.77 |
| TC0500935 | C9             | 735 complement component 9                               | 0.000404 | 5 | 2.58 | 2.56 | 2.59 | 2.48 | 2.49 | 2.47 | 2.46 | 2.49 |
| TC0900884 | C9orf144 /// Q | 389715 chromosome 9 open reading frame 144               | 0.000356 | 5 | 3.33 | 3.16 | 3.14 | 3.05 | 3.11 | 3.12 | 3.02 | 3.14 |
| TC0901249 | C9orf84        | 158401 chromosome 9 open reading frame 84                | 3.37E-06 | 5 | 4.72 | 4.40 | 5.16 | 4.89 | 4.56 | 4.49 | 4.48 | 4.12 |
| TC0101344 | CA120_HUMAN    | --- Putative uncharacterized protein C1orf120            | 0.0005   | 5 | 3.41 | 3.39 | 3.16 | 3.37 | 3.17 | 3.19 | 3.12 | 3.27 |
| TC0100620 | CACHD1         | 57685 cache domain containing 1 /// cache domain         | 1.07E-05 | 5 | 3.30 | 3.39 | 3.43 | 3.31 | 3.27 | 3.23 | 3.24 | 3.29 |
| TC0103113 | CACNA1S        | 779 calcium channel, voltage-dependent, L-type           | 0.000302 | 5 | 3.81 | 3.74 | 3.76 | 3.73 | 3.72 | 3.69 | 3.63 | 3.68 |
| TC0701382 | CACNA2D1       | 781 calcium channel, voltage-dependent, alpha 1D         | 0.000776 | 5 | 2.18 | 2.16 | 2.19 | 2.13 | 2.13 | 2.09 | 2.09 | 2.10 |
| TC0300320 | CACNA2D3       | 55799 calcium channel, voltage-dependent, alpha 2D3      | 3.89E-05 | 5 | 2.86 | 2.89 | 2.93 | 2.81 | 2.81 | 2.76 | 2.80 | 2.80 |
| TC1600572 | CALB2          | 794 calbindin 2                                          | 0.000536 | 5 | 3.27 | 3.30 | 3.34 | 3.24 | 3.28 | 3.18 | 3.18 | 3.25 |
| TC1700947 | CAMTA2         | 23125 calmodulin binding transcription activator 2       | 0.000922 | 5 | 6.18 | 6.17 | 6.02 | 6.02 | 6.02 | 5.87 | 5.83 | 5.83 |
| TC1300655 | CARS2          | 79587 cysteinyl-tRNA synthetase 2, mitochondrial         | 0.00011  | 5 | 5.34 | 5.54 | 5.47 | 5.41 | 5.35 | 5.30 | 5.29 | 5.21 |
| TC0X00860 | CASK           | 8573 calcium/calmodulin-dependent serine protein kinase  | 1.70E-08 | 5 | 3.98 | 4.38 | 4.02 | 3.93 | 3.92 | 4.00 | 4.08 | 4.00 |
| TC0700812 | CASP2          | 835 caspase 2, apoptosis-related cysteine protease       | 0.000378 | 5 | 6.27 | 6.15 | 6.36 | 6.38 | 6.24 | 6.21 | 6.13 | 6.07 |



|           |               |                                                   |          |   |      |      |      |      |      |      |      |      |
|-----------|---------------|---------------------------------------------------|----------|---|------|------|------|------|------|------|------|------|
| TC0500492 | CATSPER3      | 347732 cation channel, sperm associated 3         | 0.000307 | 5 | 3.52 | 3.24 | 3.34 | 3.26 | 3.20 | 3.21 | 3.22 | 3.21 |
| TC0202327 | CCDC108       | 255101 coiled-coil domain containing 108 /// C    | 1.24E-05 | 5 | 3.93 | 3.82 | 3.86 | 3.77 | 3.78 | 3.77 | 3.73 | 3.77 |
| TC1901652 | CCDC114       | 93233 coiled-coil domain containing 114 /// C     | 0.000203 | 5 | 4.87 | 4.86 | 4.84 | 4.72 | 4.80 | 4.83 | 4.75 | 4.78 |
| TC0102214 | CCDC17        | 149483 coiled-coil domain containing 17 /// co    | 9.04E-07 | 5 | 4.65 | 4.48 | 4.44 | 4.38 | 4.44 | 4.36 | 4.34 | 4.38 |
| TC1701630 | CCDC46        | 201134 coiled-coil domain containing 46           | 0.000953 | 5 | 2.44 | 2.48 | 2.51 | 2.44 | 2.44 | 2.39 | 2.39 | 2.41 |
| TC1701800 | CCDC57        | 732273 // coiled-coil domain containing 57 /// Co | 2.39E-06 | 5 | 4.67 | 4.63 | 4.53 | 4.51 | 4.50 | 4.49 | 4.43 | 4.45 |
| TC1200696 | CCDC63        | 160762 coiled-coil domain containing 63           | 0.000303 | 5 | 3.10 | 3.07 | 3.15 | 3.03 | 3.03 | 3.03 | 2.95 | 3.05 |
| TC0400866 | CCKAR         | 886 cholecystokinin A receptor                    | 0.0009   | 5 | 3.55 | 3.45 | 3.42 | 3.32 | 3.34 | 3.30 | 3.31 | 3.27 |
| TC0201149 | CCL20         | 6364 chemokine (C-C motif) ligand 20              | 4.32E-08 | 5 | 2.87 | 3.25 | 3.17 | 2.83 | 2.87 | 2.85 | 2.78 | 2.82 |
| TC0701352 | CCL26         | 10344 chemokine (C-C motif) ligand 26             | 9.95E-06 | 5 | 3.71 | 3.66 | 3.63 | 3.48 | 3.52 | 3.61 | 3.48 | 3.41 |
| TC1500272 | CCNDBP1       | 23582 cyclin D-type binding-protein 1             | 0.000457 | 5 | 7.89 | 7.93 | 7.94 | 7.75 | 7.67 | 7.75 | 7.68 | 7.75 |
| TC1200922 | CD163L1       | 283316 CD163 molecule-like 1                      | 0.000836 | 5 | 3.53 | 3.40 | 3.45 | 3.38 | 3.36 | 3.32 | 3.30 | 3.37 |
| TC1901113 | CD209         | 30835 CD209 molecule /// CD209 antigen (De        | 1.32E-05 | 5 | 3.71 | 3.74 | 3.63 | 3.57 | 3.62 | 3.68 | 3.52 | 3.64 |
| TC1701676 | CD300LF       | 146722 CD300 molecule-like family member f /      | 0.000226 | 5 | 7.16 | 6.83 | 7.20 | 7.10 | 6.87 | 6.89 | 6.88 | 6.97 |
| TC2000617 | CD93          | 22918 CD93 molecule                               | 0.000106 | 5 | 9.36 | 8.85 | 8.82 | 8.98 | 8.85 | 8.45 | 8.37 | 8.63 |
| TC0801123 | CDH17         | 1015 cadherin 17, LI cadherin (liver-intestine    | 0.000829 | 5 | 2.46 | 2.48 | 2.56 | 2.44 | 2.43 | 2.40 | 2.42 | 2.40 |
| TC2000420 | CDH26         | 60437 cadherin-like 26 /// Cadherin-like prote    | 1.90E-07 | 5 | 3.86 | 3.74 | 3.69 | 3.62 | 3.58 | 3.55 | 3.56 | 3.54 |
| TC0900598 | CERCAM /// CE | 51148 cerebral endothelial cell adhesion mole     | 0.000207 | 5 | 4.59 | 4.69 | 4.64 | 4.58 | 4.65 | 4.63 | 4.51 | 4.57 |
| TC0200990 | CFLAR         | 8837 CASP8 and FADD-like apoptosis regulat        | 0.000422 | 5 | 8.92 | 8.69 | 8.72 | 8.63 | 8.54 | 8.58 | 8.57 | 8.57 |
| TC0501171 | CHD1          | 1105 chromodomain helicase DNA binding p          | 4.00E-07 | 5 | 7.38 | 7.99 | 7.58 | 7.40 | 7.19 | 7.40 | 7.52 | 7.48 |
| TC1700112 | CHD3          | 1107 chromodomain helicase DNA binding p          | 6.10E-05 | 5 | 5.49 | 5.45 | 5.17 | 5.12 | 5.22 | 5.02 | 5.19 | 5.13 |
| TC1200906 | CHD4          | 1108 chromodomain helicase DNA binding p          | 1.16E-05 | 5 | 7.48 | 7.92 | 7.40 | 7.39 | 7.38 | 7.38 | 7.49 | 7.44 |
| TC0800329 | CHD7          | 55636 chromodomain helicase DNA binding p         | 0.000319 | 5 | 6.63 | 7.04 | 6.56 | 6.43 | 6.47 | 6.54 | 6.68 | 6.53 |
| TC0100830 | CHI3L2        | 1117 chitinase 3-like 2                           | 3.73E-06 | 5 | 3.24 | 3.49 | 3.29 | 3.21 | 3.23 | 3.22 | 3.24 | 3.27 |
| TC0201865 | CLASP1        | 23332 cytoplasmic linker associated protein 1     | 6.08E-07 | 5 | 6.30 | 6.66 | 6.39 | 6.37 | 6.24 | 6.25 | 6.21 | 6.18 |
| TC2100097 | CLIC6         | 54102 chloride intracellular channel 6 /// Chlc   | 0.000864 | 5 | 3.22 | 3.18 | 3.12 | 3.05 | 3.11 | 3.08 | 2.98 | 3.09 |
| TC0102462 | CNN3          | 1266 calponin 3, acidic                           | 0.000998 | 5 | 3.55 | 3.57 | 3.64 | 3.52 | 3.56 | 3.50 | 3.44 | 3.48 |
| TC0300004 | CNTN6         | 27255 contactin 6                                 | 0.000466 | 5 | 2.51 | 2.46 | 2.49 | 2.40 | 2.43 | 2.35 | 2.39 | 2.43 |
| TC0102492 | COL11A1       | 1301 collagen, type XI, alpha 1 /// Collagen a    | 0.000118 | 5 | 3.92 | 3.82 | 3.83 | 3.78 | 3.78 | 3.78 | 3.74 | 3.80 |
| TC0800526 | COL14A1       | 7373 collagen, type XIV, alpha 1 /// Collagen     | 0.000119 | 5 | 2.90 | 2.86 | 2.86 | 2.81 | 2.82 | 2.77 | 2.77 | 2.80 |
| TC0102071 | COL16A1       | 1307 collagen, type XVI, alpha 1 /// Collagen     | 0.000488 | 5 | 5.23 | 5.17 | 5.17 | 5.11 | 5.13 | 5.14 | 5.05 | 5.11 |
| TC0601348 | COL21A1       | 81578 collagen, type XXI, alpha 1 /// collagen,   | 0.000133 | 5 | 3.40 | 3.32 | 3.35 | 3.29 | 3.27 | 3.29 | 3.22 | 3.31 |
| TC0102401 | COL24A1       | 255631 collagen, type XXIV, alpha 1               | 1.72E-05 | 5 | 3.62 | 3.50 | 3.47 | 3.45 | 3.41 | 3.42 | 3.37 | 3.42 |
| TC0401180 | COL25A1       | 84570 collagen, type XXV, alpha 1 /// Collager    | 7.88E-05 | 5 | 4.14 | 4.05 | 4.07 | 4.02 | 4.03 | 4.01 | 3.94 | 4.03 |

|           |                            |                                                |          |   |      |      |      |      |      |      |      |      |
|-----------|----------------------------|------------------------------------------------|----------|---|------|------|------|------|------|------|------|------|
| TC0300618 | COL29A1                    | 256076 collagen, type XXIX, alpha 1            | 0.000626 | 5 | 2.49 | 2.34 | 2.34 | 2.29 | 2.26 | 2.23 | 2.18 | 2.31 |
| TC0200930 | COL3A1                     | 1281 collagen, type III, alpha 1 (Ehlers-Danlo | 2.02E-06 | 5 | 4.38 | 4.28 | 4.26 | 4.20 | 4.22 | 4.22 | 4.16 | 4.22 |
| TC1300275 | COL4A2                     | 1284 collagen, type IV, alpha 2 /// Collagen a | 4.35E-05 | 5 | 4.86 | 4.79 | 4.77 | 4.71 | 4.74 | 4.73 | 4.66 | 4.75 |
| TC0201146 | COL4A3                     | 1285 collagen, type IV, alpha 3 (Goodpasture   | 0.000456 | 5 | 3.94 | 3.89 | 3.89 | 3.83 | 3.85 | 3.83 | 3.80 | 3.82 |
| TC0202364 | COL4A4                     | 1286 collagen, type IV, alpha 4 /// Collagen a | 1.45E-05 | 5 | 3.76 | 3.65 | 3.64 | 3.59 | 3.60 | 3.58 | 3.51 | 3.60 |
| TC0X00488 | COL4A5                     | 1287 collagen, type IV, alpha 5 (Alport syndr  | 7.38E-05 | 5 | 3.53 | 3.42 | 3.41 | 3.35 | 3.39 | 3.37 | 3.34 | 3.38 |
| TC0X01146 | COL4A6                     | 1288 collagen, type IV, alpha 6 /// Collagen a | 1.24E-06 | 5 | 3.58 | 3.49 | 3.50 | 3.40 | 3.41 | 3.39 | 3.39 | 3.42 |
| TC0202171 | COL5A2 /// CO              | 1290 collagen, type V, alpha 2 /// Collagen a  | 2.77E-06 | 5 | 3.94 | 3.85 | 3.86 | 3.78 | 3.77 | 3.76 | 3.73 | 3.79 |
| TC1700328 | CPD                        | 1362 carboxypeptidase D                        | 6.60E-10 | 5 | 8.99 | 9.62 | 9.35 | 9.11 | 8.92 | 9.00 | 8.90 | 8.99 |
| TC0300028 | CPNE9                      | 151835 copine family member IX /// Copine-9 (  | 0.000179 | 5 | 3.24 | 3.22 | 3.22 | 3.12 | 3.17 | 3.11 | 3.08 | 3.13 |
| TC0701108 | CRHR2                      | 1395 corticotropin releasing hormone recept    | 0.000504 | 5 | 4.08 | 4.21 | 4.16 | 4.07 | 4.13 | 4.11 | 4.03 | 4.11 |
| TC2200147 | CRYBB3                     | 1417 crystallin, beta B3                       | 9.99E-05 | 5 | 4.99 | 4.89 | 4.92 | 4.77 | 4.81 | 4.87 | 4.68 | 4.84 |
| TC0102097 | CSMD2                      | 114784 CUB and Sushi multiple domains 2 /// C  | 0.00011  | 5 | 3.70 | 3.69 | 3.69 | 3.62 | 3.63 | 3.63 | 3.60 | 3.62 |
| TC1701801 | CSNK1D                     | 1453 casein kinase 1, delta /// Casein kinase  | 0.000108 | 5 | 7.37 | 7.39 | 7.03 | 7.11 | 7.07 | 7.03 | 6.93 | 6.99 |
| TC0100647 | CTH                        | 1491 cystathionase (cystathionine gamma-ly     | 0.000439 | 5 | 2.85 | 2.83 | 2.83 | 2.75 | 2.73 | 2.72 | 2.69 | 2.73 |
| TC0200378 | CTNNA2                     | 1496 catenin (cadherin-associated protein), c  | 0.000303 | 5 | 3.27 | 3.17 | 3.18 | 3.14 | 3.14 | 3.09 | 3.10 | 3.10 |
| TC0901170 | CTSL2 /// CTSL: 1515 /// 1 | cathepsin L2 /// cathepsin L1                  | 3.99E-06 | 5 | 3.35 | 3.15 | 3.15 | 3.08 | 3.06 | 3.10 | 3.04 | 3.13 |
| TC1101170 | CYB5R2                     | 51700 cytochrome b5 reductase 2 /// NADH-c     | 6.57E-06 | 5 | 3.86 | 3.95 | 3.93 | 3.80 | 3.86 | 3.79 | 3.72 | 3.73 |
| TC0801302 | CYP11B2                    | 1585 cytochrome P450, family 11, subfamily     | 0.000106 | 5 | 5.10 | 4.95 | 4.91 | 4.88 | 4.88 | 4.96 | 4.76 | 4.92 |
| TC1901525 | CYP2A7 /// CYF 1549 /// 1  | cytochrome P450, family 2, subfamily A         | 5.01E-05 | 5 | 4.27 | 4.17 | 4.17 | 4.08 | 4.10 | 4.14 | 4.07 | 4.13 |
| TC1000462 | CYP2C18 /// CY 1562 /// 1  | cytochrome P450, family 2, subfamily C         | 0.000848 | 5 | 2.48 | 2.48 | 2.52 | 2.41 | 2.44 | 2.42 | 2.37 | 2.50 |
| TC0601302 | CYP39A1                    | 51302 cytochrome P450, family 39, subfamily    | 0.000678 | 5 | 2.21 | 2.16 | 2.25 | 2.10 | 2.12 | 2.10 | 2.12 | 2.13 |
| TC0700527 | CYP3A43                    | 64816 cytochrome P450, family 3, subfamily A   | 0.000197 | 5 | 2.50 | 2.37 | 2.39 | 2.34 | 2.35 | 2.31 | 2.29 | 2.34 |
| TC0200808 | DAPL1                      | 92196 death associated protein-like 1          | 0.000929 | 5 | 3.17 | 3.14 | 3.20 | 2.98 | 2.98 | 3.07 | 2.92 | 3.03 |
| TC0101109 | DCST1                      | 149095 DC-STAMP domain containing 1 /// DC-    | 0.000418 | 5 | 3.95 | 3.86 | 3.86 | 3.79 | 3.78 | 3.81 | 3.77 | 3.83 |
| TC0701201 | DDC                        | 1644 dopa decarboxylase (aromatic L-amino      | 0.000299 | 5 | 3.50 | 3.53 | 3.53 | 3.43 | 3.46 | 3.42 | 3.40 | 3.43 |
| TC0102800 | DENND4B                    | --- DENN/MADD domain containing 4B. [S         | 0.000132 | 5 | 5.75 | 5.64 | 5.62 | 5.53 | 5.57 | 5.57 | 5.53 | 5.47 |
| TC0801330 | DGAT1                      | 8694 diacylglycerol O-acyltransferase homol    | 8.71E-06 | 5 | 6.12 | 5.79 | 5.70 | 5.62 | 5.64 | 5.67 | 5.60 | 5.55 |
| TC1200415 | DGKA                       | 1606 diacylglycerol kinase, alpha 80kDa        | 0.000105 | 5 | 5.66 | 5.60 | 5.48 | 5.39 | 5.45 | 5.36 | 5.40 | 5.27 |
| TC1100689 | DKFZp434E111               | 283218 hypothetical protein DKFZp434E1119      | 0.000615 | 5 | 2.45 | 2.31 | 2.19 | 2.02 | 2.25 | 2.23 | 2.09 | 2.13 |
| TC0300421 | DKFZp667G211               | 131544 hypothetical protein DKFZp667G2110      | 0.000106 | 5 | 2.78 | 2.84 | 2.89 | 2.77 | 2.70 | 2.76 | 2.73 | 2.73 |
| TC1001092 | DLG5                       | 9231 discs, large homolog 5 (Drosophila) ///   | 0.000134 | 5 | 4.33 | 4.27 | 4.22 | 4.17 | 4.21 | 4.15 | 4.14 | 4.17 |
| TC0100482 | DMAP1                      | 55929 DNA methyltransferase 1 associated pr    | 0.000737 | 5 | 5.06 | 4.91 | 4.95 | 4.92 | 4.98 | 4.88 | 4.88 | 4.84 |
| TC0X00837 | DMD                        | 1756 dystrophin (muscular dystrophy, Duch      | 0.000709 | 5 | 2.45 | 2.48 | 2.51 | 2.45 | 2.44 | 2.44 | 2.41 | 2.43 |

|           |                |        |                                            |          |   |      |      |      |      |      |      |      |      |
|-----------|----------------|--------|--------------------------------------------|----------|---|------|------|------|------|------|------|------|------|
| TC1701742 | DNAH17         | ---    | CDNA FLJ44071 fis, clone TESTI403772       | 0.000409 | 5 | 4.48 | 4.51 | 4.50 | 4.51 | 4.46 | 4.43 | 4.36 | 4.38 |
| TC1700108 | DNAH2          | 146754 | dynein, axonemal, heavy chain 2 /// dy     | 0.000407 | 5 | 3.31 | 3.32 | 3.32 | 3.25 | 3.27 | 3.25 | 3.22 | 3.28 |
| TC1600926 | DNAH3          | 55567  | dynein, axonemal, heavy chain 3            | 6.84E-05 | 5 | 2.84 | 2.85 | 2.87 | 2.80 | 2.80 | 2.76 | 2.76 | 2.79 |
| TC1700137 | DNAH9          | 1770   | dynein, axonemal, heavy chain 9            | 1.10E-05 | 5 | 3.11 | 3.07 | 3.08 | 3.02 | 3.01 | 3.00 | 2.99 | 3.03 |
| TC0900146 | DNAI1          | 27019  | dynein, axonemal, intermediate chain 1     | 7.61E-05 | 5 | 3.56 | 3.55 | 3.57 | 3.46 | 3.45 | 3.45 | 3.44 | 3.48 |
| TC1100133 | DNHD1          | 144132 | dynein heavy chain domain 1                | 3.61E-06 | 5 | 4.23 | 4.06 | 4.15 | 4.01 | 4.00 | 4.03 | 4.02 | 4.06 |
| TC1000474 | DNTT           | 1791   | deoxynucleotidyltransferase, terminal      | 0.000817 | 5 | 3.01 | 2.98 | 2.97 | 2.88 | 2.87 | 2.87 | 2.85 | 2.86 |
| TC0300290 | DOCK3          | 1795   | dedicator of cytokinesis 3                 | 0.000289 | 5 | 3.09 | 3.04 | 3.03 | 2.98 | 2.99 | 2.95 | 2.95 | 2.99 |
| TC1901175 | DOCK6          | 57572  | dedicator of cytokinesis 6                 | 0.000477 | 5 | 4.32 | 4.31 | 4.31 | 4.23 | 4.26 | 4.27 | 4.17 | 4.23 |
| TC0700909 | DPP6           | 1804   | dipeptidyl-peptidase 6 /// Dipeptidyl ar   | 0.000776 | 5 | 3.37 | 3.37 | 3.35 | 3.29 | 3.32 | 3.26 | 3.24 | 3.29 |
| TC0100979 | DRD5P2         | ---    | Seven transmembrane helix receptor. [      | 0.000993 | 5 | 3.72 | 3.62 | 3.62 | 3.76 | 3.74 | 3.61 | 3.44 | 3.49 |
| TC0X00424 | DRP2           | 1821   | dystrophin related protein 2 /// Dystro    | 6.96E-05 | 5 | 3.34 | 3.29 | 3.32 | 3.22 | 3.25 | 3.24 | 3.18 | 3.24 |
| TC0600053 | DSP            | 1832   | desmoplakin                                | 0.00068  | 5 | 3.01 | 3.03 | 3.03 | 3.00 | 2.96 | 2.94 | 2.92 | 3.01 |
| TC0400089 | DUB3           | 377630 | deubiquitinating enzyme 3                  | 0.00017  | 5 | 3.29 | 3.24 | 3.28 | 3.10 | 3.07 | 2.76 | 2.75 | 2.92 |
| TC1001084 | DUSP13         | 51207  | dual specificity phosphatase 13 /// Dua    | 3.82E-06 | 5 | 5.31 | 5.51 | 5.33 | 5.29 | 5.32 | 5.30 | 5.22 | 5.25 |
| TC0800838 | DUSP4          | 1846   | dual specificity phosphatase 4             | 0.00069  | 5 | 3.34 | 3.48 | 3.40 | 3.28 | 3.30 | 3.30 | 3.33 | 3.29 |
| TC1501103 | EDC3           | 80153  | enhancer of mRNA decapping 3 homolog       | 4.88E-11 | 5 | 5.20 | 5.36 | 5.39 | 5.25 | 5.29 | 5.15 | 5.10 | 4.96 |
| TC0400582 | EDNRA          | 1909   | endothelin receptor type A /// Endothe     | 1.01E-05 | 5 | 2.85 | 2.60 | 2.71 | 2.58 | 2.64 | 2.55 | 2.58 | 2.58 |
| TC0800924 | EFCAB1         | 79645  | EF-hand calcium binding domain 1           | 4.26E-07 | 5 | 3.17 | 2.99 | 3.02 | 2.83 | 2.89 | 2.88 | 2.89 | 2.93 |
| TC0201530 | EFEMP1         | 2202   | EGF-containing fibulin-like extracellular  | 0.000807 | 5 | 2.93 | 2.89 | 2.94 | 2.80 | 2.83 | 2.85 | 2.83 | 2.85 |
| TC0100390 | EIF2C4         | 192670 | eukaryotic translation initiation factor 4 | 3.24E-07 | 5 | 8.61 | 8.34 | 8.41 | 8.16 | 8.03 | 8.05 | 8.00 | 8.01 |
| TC2200647 | ELFN2          | 114794 | extracellular leucine-rich repeat and fib  | 7.85E-05 | 5 | 4.11 | 3.86 | 4.00 | 3.74 | 3.83 | 3.88 | 3.79 | 3.81 |
| TC0200200 | EML4           | 27436  | echinoderm microtubule associated pro      | 0.000102 | 5 | 6.74 | 6.85 | 6.67 | 6.41 | 6.29 | 6.46 | 6.44 | 6.42 |
| TC0801212 | ENPP2          | 5168   | ectonucleotide pyrophosphatase/phos        | 4.12E-07 | 5 | 3.03 | 3.31 | 3.04 | 2.92 | 2.89 | 2.96 | 3.00 | 3.06 |
| TC0300407 | EPHA3          | 2042   | EPH receptor A3                            | 0.000567 | 5 | 2.68 | 2.61 | 2.69 | 2.59 | 2.60 | 2.55 | 2.52 | 2.59 |
| TC0202280 | ERBB4          | 2066   | v-erb-a erythroblastic leukemia viral on   | 0.000497 | 5 | 2.93 | 2.87 | 2.91 | 2.81 | 2.85 | 2.83 | 2.79 | 2.82 |
| TC0800650 | ERICH1 /// Q8M | 157697 | glutamate-rich 1                           | 0.000935 | 5 | 5.49 | 5.48 | 5.52 | 5.64 | 5.50 | 5.36 | 5.32 | 5.28 |
| TC2000339 | EYA2           | 2139   | eyes absent homolog 2 (Drosophila) ///     | 5.31E-05 | 5 | 4.18 | 4.18 | 4.22 | 4.12 | 4.12 | 4.13 | 4.06 | 4.11 |
| TC0501528 | F12            | 2161   | coagulation factor XII (Hageman factor)    | 0.000601 | 5 | 4.63 | 4.65 | 4.60 | 4.53 | 4.55 | 4.50 | 4.47 | 4.52 |
| TC0600693 | FABP7          | 2173   | fatty acid binding protein 7, brain /// F  | 5.89E-05 | 5 | 2.72 | 2.54 | 2.53 | 2.51 | 2.48 | 2.39 | 2.37 | 2.49 |
| TC0X00944 | FAM156B /// T  | 727866 | family with sequence similarity 156, me    | 3.08E-07 | 5 | 5.11 | 4.96 | 4.96 | 4.82 | 4.88 | 4.86 | 4.87 | 4.85 |
| TC0500421 | FAM170A /// N  | 340069 | family with sequence similarity 170, me    | 0.000236 | 5 | 3.91 | 3.67 | 3.71 | 3.63 | 3.65 | 3.59 | 3.59 | 3.63 |
| TC1000964 | FAM170B /// C  | 170370 | family with sequence similarity 170, me    | 0.000363 | 5 | 4.14 | 4.01 | 4.02 | 3.90 | 4.00 | 3.85 | 3.73 | 3.67 |
| TC1701644 | FAM20A         | 54757  | family with sequence similarity 20, mer    | 0.000277 | 5 | 4.82 | 4.60 | 4.64 | 4.73 | 4.58 | 4.52 | 4.54 | 4.50 |

|           |                 |                                                    |          |   |      |      |      |      |      |      |      |      |
|-----------|-----------------|----------------------------------------------------|----------|---|------|------|------|------|------|------|------|------|
| TC1001258 | FAM26C          | 255022 family with sequence similarity 26, mer     | 5.30E-05 | 5 | 3.92 | 3.63 | 3.63 | 3.45 | 3.53 | 3.49 | 3.41 | 3.53 |
| TC0301300 | FAM3D           | 131177 family with sequence similarity 3, mem      | 5.85E-05 | 5 | 3.98 | 3.82 | 3.83 | 3.81 | 3.74 | 3.70 | 3.70 | 3.78 |
| TC0801251 | FAM49B          | 51571 family with sequence similarity 49, mer      | 3.11E-06 | 5 | 8.24 | 8.37 | 8.39 | 8.15 | 8.09 | 8.19 | 8.13 | 8.22 |
| TC2000694 | FAM83C          | 128876 family with sequence similarity 83, mer     | 0.000433 | 5 | 4.24 | 4.13 | 4.13 | 4.01 | 4.02 | 4.05 | 3.98 | 4.03 |
| TC0401470 | FAT             | 2195 FAT tumor suppressor homolog 1 (Dros          | 0.00057  | 5 | 2.88 | 2.85 | 2.88 | 2.82 | 2.80 | 2.80 | 2.76 | 2.80 |
| TC0501423 | FAT2            | 2196 FAT tumor suppressor homolog 2 (Dros          | 9.25E-06 | 5 | 3.78 | 3.72 | 3.74 | 3.65 | 3.64 | 3.63 | 3.59 | 3.64 |
| TC0300068 | FBLN2           | 2199 fibulin 2                                     | 0.000611 | 5 | 4.54 | 4.50 | 4.49 | 4.47 | 4.42 | 4.41 | 4.34 | 4.40 |
| TC0201622 | FBXO41          | 150726 F-box protein 41                            | 0.000714 | 5 | 4.40 | 4.47 | 4.47 | 4.33 | 4.36 | 4.40 | 4.32 | 4.38 |
| TC0300252 | FBXW12          | 285231 F-box and WD repeat domain containir        | 0.000715 | 5 | 2.86 | 2.76 | 2.79 | 2.71 | 2.75 | 2.67 | 2.68 | 2.69 |
| TC0103185 | FCAMR           | 83953 Fc receptor, IgA, IgM, high affinity /// F   | 0.0005   | 5 | 3.67 | 3.54 | 3.59 | 3.48 | 3.48 | 3.48 | 3.48 | 3.56 |
| TC0102876 | FCRL2           | 79368 Fc receptor-like 2 /// Fc receptor-like p    | 3.38E-06 | 5 | 2.95 | 2.97 | 3.09 | 2.95 | 2.95 | 2.88 | 2.84 | 2.85 |
| TC0800541 | FER1L6          | 654463 fer-1-like 6 (C. elegans)                   | 0.00053  | 5 | 3.11 | 3.07 | 3.09 | 3.05 | 3.03 | 3.00 | 2.97 | 3.04 |
| TC1900443 | FFAR2           | 2867 free fatty acid receptor 2                    | 1.99E-06 | 5 | 7.70 | 8.34 | 7.94 | 7.71 | 7.41 | 7.63 | 7.73 | 7.74 |
| TC1201463 | FGD6            | 55785 FYVE, RhoGEF and PH domain containir         | 1.05E-06 | 5 | 2.73 | 2.76 | 2.84 | 2.69 | 2.69 | 2.67 | 2.72 | 2.73 |
| TC0901260 | FKBP15          | 23307 FK506 binding protein 15, 133kDa             | 1.51E-05 | 5 | 7.29 | 7.05 | 7.47 | 7.33 | 7.09 | 7.04 | 7.05 | 6.89 |
| TC0300374 | FLJ10213        | 55096 hypothetical protein FLJ10213                | 6.22E-08 | 5 | 6.21 | 6.70 | 6.27 | 6.30 | 6.28 | 6.14 | 5.99 | 5.77 |
| TC1400047 | FLJ10357 /// N  | 55701 hypothetical protein FLJ10357 /// CDN        | 0.000229 | 5 | 5.69 | 5.34 | 5.44 | 5.53 | 5.33 | 5.21 | 5.16 | 5.24 |
| TC0901473 | FLJ20433 /// N  | 54932 hypothetical protein FLJ20433 /// CDN        | 0.000238 | 5 | 5.07 | 5.01 | 4.99 | 4.93 | 4.97 | 4.95 | 4.88 | 4.93 |
| TC1901262 | FLJ21438        | 64926 hypothetical protein FLJ21438                | 0.000477 | 5 | 5.53 | 5.50 | 5.48 | 5.35 | 5.44 | 5.38 | 5.33 | 5.33 |
| TC1601268 | FLJ22167 /// CI | 79583 /// hypothetical protein FLJ22167 /// carb   | 0.000511 | 5 | 4.18 | 4.14 | 4.23 | 4.11 | 4.10 | 4.12 | 4.08 | 4.13 |
| TC0500944 | FLJ40243        | 133558 hypothetical protein FLJ40243               | 0.00031  | 5 | 2.51 | 2.45 | 2.49 | 2.42 | 2.43 | 2.40 | 2.37 | 2.42 |
| TC0500600 | FLJ41603        | 389337 FLJ41603 protein                            | 9.94E-06 | 5 | 4.24 | 4.10 | 4.13 | 4.06 | 4.03 | 4.04 | 3.92 | 4.04 |
| TC0200924 | FLJ44048 /// N  | 401024 FLJ44048 protein /// CDNA FLJ44048 fi       | 0.000251 | 5 | 2.02 | 2.08 | 2.11 | 2.09 | 2.02 | 1.98 | 1.93 | 2.08 |
| TC1500798 | FMN1            | 644296 // formin 1                                 | 0.000364 | 5 | 3.24 | 3.34 | 3.35 | 3.26 | 3.22 | 3.16 | 3.17 | 3.18 |
| TC0103145 | FMOD            | 2331 fibromodulin                                  | 1.71E-05 | 5 | 3.04 | 3.04 | 3.11 | 2.93 | 2.96 | 2.84 | 2.87 | 2.94 |
| TC0202295 | FN1             | 2335 fibronectin 1                                 | 0.000244 | 5 | 3.11 | 3.06 | 3.10 | 3.01 | 3.04 | 3.00 | 2.98 | 3.04 |
| TC0400339 | FRAS1           | 80144 Fraser syndrome 1 /// Extracellular mat      | 1.42E-05 | 5 | 3.23 | 3.18 | 3.18 | 3.10 | 3.13 | 3.12 | 3.08 | 3.11 |
| TC0900786 | FREM1           | 158326 FRAS1 related extracellular matrix 1 ///    | 0.000305 | 5 | 2.67 | 2.67 | 2.69 | 2.60 | 2.61 | 2.58 | 2.58 | 2.61 |
| TC1100541 | FRMD8           | 83786 FERM domain containing 8 /// FERM do         | 0.000388 | 5 | 5.01 | 4.95 | 4.89 | 4.83 | 4.83 | 4.88 | 4.86 | 4.91 |
| TC1000960 | FRMPD2          | 143162 FERM and PDZ domain containing 2            | 5.93E-05 | 5 | 3.59 | 3.55 | 3.55 | 3.47 | 3.50 | 3.47 | 3.43 | 3.48 |
| TC0401369 | FSTL5           | 56884 follistatin-like 5 /// Follistatin-related p | 0.000827 | 5 | 2.56 | 2.47 | 2.50 | 2.43 | 2.43 | 2.38 | 2.41 | 2.42 |
| TC0X01395 | GAB3            | 139716 GRB2-associated binding protein 3 /// C     | 1.41E-08 | 5 | 6.42 | 5.97 | 5.85 | 5.85 | 5.67 | 5.66 | 5.70 | 5.67 |
| TC0500665 | GABRA6          | 2559 gamma-aminobutyric acid (GABA) A rec          | 0.0007   | 5 | 2.45 | 2.46 | 2.56 | 2.39 | 2.46 | 2.39 | 2.38 | 2.43 |
| TC0X00671 | GABRQ           | 55879 gamma-aminobutyric acid (GABA) rece          | 0.000222 | 5 | 3.11 | 3.10 | 3.15 | 3.06 | 3.06 | 2.96 | 3.02 | 3.02 |

|           |                |        |                                           |          |   |      |      |      |      |      |      |      |      |
|-----------|----------------|--------|-------------------------------------------|----------|---|------|------|------|------|------|------|------|------|
| TC1400321 | GALNTL1        | 57452  | UDP-N-acetyl-alpha-D-galactosamine:p      | 0.000451 | 5 | 3.39 | 3.41 | 3.42 | 3.32 | 3.39 | 3.33 | 3.25 | 3.31 |
| TC1900904 | GALP           | 85569  | galanin-like peptide                      | 0.000923 | 5 | 4.07 | 3.94 | 3.91 | 3.88 | 3.81 | 3.87 | 3.77 | 3.85 |
| TC0300516 | GAP43          | 2596   | growth associated protein 43              | 0.000559 | 5 | 3.67 | 3.51 | 3.52 | 3.43 | 3.44 | 3.40 | 3.45 | 3.41 |
| TC0900564 | GAPVD1         | 26130  | GTPase activating protein and VPS9 do     | 0.00046  | 5 | 6.81 | 7.01 | 6.83 | 6.76 | 6.70 | 6.69 | 6.75 | 6.69 |
| TC1800098 | GATA6          | 2627   | GATA binding protein 6                    | 0.0005   | 5 | 3.42 | 3.52 | 3.56 | 3.40 | 3.43 | 3.49 | 3.35 | 3.47 |
| TC0X00703 | GDI1           | 2664   | GDP dissociation inhibitor 1              | 0.000715 | 5 | 7.66 | 7.48 | 7.33 | 7.26 | 7.28 | 7.23 | 7.15 | 7.17 |
| TC1200456 | GEFT /// SLC26 | 115557 | // RhoA/RAC/CDC42 exchange factor ///     | 0.000212 | 5 | 3.94 | 3.94 | 3.96 | 3.83 | 3.86 | 3.85 | 3.83 | 3.88 |
| TC0600315 | GGNB1_HUMA     | ---    | Gametogenetin-binding protein 1. [Sou     | 1.69E-05 | 5 | 4.23 | 3.92 | 3.98 | 3.95 | 3.88 | 3.78 | 3.80 | 3.99 |
| TC0100382 | GJB3           | 2707   | gap junction protein, beta 3, 31kDa       | 0.000155 | 5 | 4.01 | 3.77 | 3.87 | 3.77 | 3.67 | 3.63 | 3.75 | 3.73 |
| TC0X00121 | GK /// GK3P    | 2710   | glycerol kinase /// Glycerol kinase (EC 2 | 0.000422 | 5 | 8.32 | 8.57 | 8.26 | 8.18 | 7.96 | 8.13 | 8.05 | 8.07 |
| TC0202332 | GLB1L          | 79411  | galactosidase, beta 1-like /// galactosid | 0.000188 | 5 | 3.55 | 3.60 | 3.46 | 3.51 | 3.57 | 3.51 | 3.44 | 3.42 |
| TC1101018 | GLB1L3 /// Q8  | 112937 | galactosidase, beta 1-like 3 /// galactos | 0.00023  | 5 | 3.20 | 3.11 | 3.14 | 3.06 | 3.06 | 3.05 | 3.02 | 3.03 |
| TC0300306 | GLYCTK /// GLC | 132158 | glycerate kinase /// Glycerate kinase (E  | 0.000813 | 5 | 4.89 | 4.96 | 4.96 | 4.90 | 4.93 | 4.84 | 4.86 | 4.81 |
| TC1200063 | GNB3           | 2784   | guanine nucleotide binding protein (G     | 0.000783 | 5 | 4.27 | 4.16 | 4.20 | 4.10 | 4.07 | 4.13 | 4.08 | 4.08 |
| TC0901327 | GOLGA1         | 2800   | golgi autoantigen, golgin subfamily a, 1  | 2.39E-07 | 5 | 5.59 | 5.68 | 5.84 | 5.64 | 5.42 | 5.32 | 5.36 | 5.24 |
| TC1600916 | GP2            | 2813   | glycoprotein 2 (zymogen granule membl     | 9.10E-05 | 5 | 3.48 | 3.42 | 3.46 | 3.34 | 3.31 | 3.32 | 3.28 | 3.35 |
| TC1300230 | GPC6           | 10082  | glypican 6                                | 0.000516 | 5 | 3.22 | 3.20 | 3.18 | 3.08 | 3.13 | 3.08 | 3.07 | 3.08 |
| TC1200319 | GPD1           | 2819   | glycerol-3-phosphate dehydrogenase 1      | 5.04E-05 | 5 | 3.82 | 3.69 | 3.64 | 3.59 | 3.61 | 3.54 | 3.52 | 3.53 |
| TC0X00778 | GPM6B          | 2824   | glycoprotein M6B                          | 0.000183 | 5 | 4.07 | 3.95 | 3.97 | 3.90 | 3.95 | 3.92 | 3.84 | 3.90 |
| TC1200829 | GPR133         | 283383 | G protein-coupled receptor 133 /// Pro    | 0.000541 | 5 | 3.73 | 3.78 | 3.80 | 3.70 | 3.69 | 3.71 | 3.66 | 3.69 |
| TC1600478 | GPR56          | 9289   | G protein-coupled receptor 56 /// G-pr    | 0.00056  | 5 | 4.90 | 4.77 | 4.76 | 4.68 | 4.70 | 4.71 | 4.67 | 4.72 |
| TC1200348 | GRASP          | 160622 | GRP1 (general receptor for phosphoinc     | 0.000137 | 5 | 4.36 | 4.43 | 4.42 | 4.35 | 4.30 | 4.30 | 4.23 | 4.27 |
| TC0200047 | GREB1 /// NP_1 | 9687   | GREB1 protein /// GREB1 protein isofo     | 0.000291 | 5 | 3.66 | 3.65 | 3.69 | 3.62 | 3.62 | 3.60 | 3.54 | 3.60 |
| TC2100266 | GRIK1          | 2897   | glutamate receptor, ionotropic, kainate   | 0.000181 | 5 | 3.41 | 3.25 | 3.34 | 3.22 | 3.21 | 3.21 | 3.22 | 3.23 |
| TC0600590 | GRIK2          | 2898   | glutamate receptor, ionotropic, kainate   | 0.000629 | 5 | 2.64 | 2.61 | 2.61 | 2.55 | 2.59 | 2.56 | 2.49 | 2.52 |
| TC1701678 | GRIN2C         | 2905   | glutamate receptor, ionotropic, N-metl    | 0.00013  | 5 | 4.21 | 4.19 | 4.17 | 4.09 | 4.11 | 4.08 | 4.04 | 4.06 |
| TC0301030 | GRIP2          | 80852  | glutamate receptor interacting protein    | 0.000547 | 5 | 4.57 | 4.49 | 4.45 | 4.43 | 4.47 | 4.46 | 4.37 | 4.43 |
| TC1000629 | GRK5           | 2869   | G protein-coupled receptor kinase 5 ///   | 1.13E-08 | 5 | 4.96 | 5.29 | 4.65 | 4.75 | 4.75 | 4.87 | 4.86 | 5.06 |
| TC0300017 | GRM7           | 2917   | glutamate receptor, metabotropic 7        | 0.000382 | 5 | 2.83 | 2.86 | 2.91 | 2.77 | 2.78 | 2.84 | 2.74 | 2.81 |
| TC0701608 | GRM8           | 652292 | // glutamate receptor, metabotropic 8     | 9.94E-05 | 5 | 2.80 | 2.83 | 2.92 | 2.80 | 2.79 | 2.78 | 2.74 | 2.77 |
| TC0800604 | GSDMDC1        | 79792  | gasdermin domain containing 1             | 0.000286 | 5 | 5.49 | 5.48 | 5.41 | 5.35 | 5.34 | 5.36 | 5.31 | 5.35 |
| TC1400393 | GSTZ1          | 2954   | glutathione transferase zeta 1 (maleyla   | 8.31E-06 | 5 | 4.14 | 4.19 | 4.22 | 4.06 | 4.09 | 4.04 | 3.95 | 4.05 |
| TC2200278 | GTPBP1         | 9567   | GTP binding protein 1                     | 2.69E-09 | 5 | 6.80 | 7.42 | 7.05 | 6.96 | 6.88 | 6.80 | 6.67 | 6.70 |
| TC1300496 | GUCY1B2        | ---    | Guanylate cyclase soluble subunit beta    | 0.000622 | 5 | 2.70 | 2.63 | 2.67 | 2.56 | 2.58 | 2.56 | 2.53 | 2.59 |

|           |                |        |                                            |          |   |      |      |      |      |      |      |      |      |
|-----------|----------------|--------|--------------------------------------------|----------|---|------|------|------|------|------|------|------|------|
| TC1201013 | GUCY2C         | 2984   | guanylate cyclase 2C (heat stable enter    | 0.000249 | 5 | 3.24 | 3.40 | 3.37 | 3.22 | 3.22 | 3.08 | 3.12 | 3.11 |
| TC1700114 | GUCY2D         | 3000   | guanylate cyclase 2D, membrane (retin      | 0.000196 | 5 | 4.66 | 4.69 | 4.72 | 4.61 | 4.63 | 4.61 | 4.54 | 4.60 |
| TC0X01149 | GUCY2F         | 2986   | guanylate cyclase 2F, retinal              | 2.67E-05 | 5 | 2.65 | 2.55 | 2.55 | 2.45 | 2.46 | 2.44 | 2.47 | 2.48 |
| TC1900437 | HAMP           | 57817  | hepcidin antimicrobial peptide             | 4.21E-05 | 5 | 5.44 | 5.59 | 5.35 | 5.29 | 5.27 | 5.29 | 5.17 | 5.30 |
| TC1701363 | HAP1           | 9001   | huntingtin-associated protein 1            | 0.000565 | 5 | 4.26 | 4.27 | 4.29 | 4.22 | 4.17 | 4.19 | 4.13 | 4.12 |
| TC0501345 | HBEGF          | 1839   | heparin-binding EGF-like growth factor     | 3.26E-09 | 5 | 4.17 | 4.67 | 4.35 | 4.28 | 4.17 | 4.14 | 4.08 | 4.07 |
| TC0X00214 | HDAC6          | 10013  | histone deacetylase 6 /// Histone deac     | 0.00032  | 5 | 4.54 | 4.48 | 4.46 | 4.45 | 4.49 | 4.44 | 4.43 | 4.39 |
| TC1400770 | HEATR5A        | ---    | HEAT repeat containing 5A [Source:Ref      | 0.000911 | 5 | 4.84 | 4.80 | 4.92 | 4.59 | 4.44 | 4.72 | 4.86 | 4.99 |
| TC1701633 | HELZ           | 9931   | helicase with zinc finger                  | 0.000946 | 5 | 6.81 | 7.09 | 6.88 | 6.86 | 6.69 | 6.69 | 6.77 | 6.72 |
| TC0X00307 | HEPH           | 9843   | hephaestin                                 | 0.000153 | 5 | 3.26 | 3.15 | 3.18 | 3.06 | 3.09 | 3.10 | 3.07 | 3.13 |
| TC0301132 | HHATL          | 57467  | hedgehog acyltransferase-like /// Glyce    | 1.23E-05 | 5 | 4.31 | 4.16 | 4.14 | 4.08 | 4.06 | 4.08 | 4.02 | 4.08 |
| TC0103256 | HHIPL2 /// KIA | 79802  | HHIP-like 2 /// CDNA FLJ13840 fis, clon    | 0.000344 | 5 | 3.19 | 3.06 | 3.08 | 2.96 | 3.01 | 3.01 | 2.97 | 2.97 |
| TC0600078 | HIVEP1         | 3096   | human immunodeficiency virus type I        | 0.000154 | 5 | 6.96 | 7.11 | 6.64 | 6.62 | 6.52 | 6.64 | 6.80 | 6.79 |
| TC0800180 | HMBOX1         | 79618  | homeobox containing 1 /// Homeobox-        | 2.09E-06 | 5 | 5.72 | 5.55 | 5.36 | 5.23 | 5.19 | 5.23 | 5.39 | 5.29 |
| TC0101361 | HMCN1          | 83872  | hemicentin 1 /// Hemicentin-1 precurs      | 3.73E-07 | 5 | 2.66 | 2.65 | 2.65 | 2.54 | 2.58 | 2.55 | 2.52 | 2.57 |
| TC0102151 | HPCAL4         | 51440  | hippocalcin like 4                         | 5.24E-06 | 5 | 4.74 | 4.75 | 4.77 | 4.62 | 4.65 | 4.66 | 4.52 | 4.62 |
| TC1701757 | HRNBP3 /// NP  | 146713 | hexaribonucleotide binding protein 3       | 1.71E-06 | 5 | 4.25 | 4.33 | 4.39 | 4.27 | 4.28 | 4.26 | 4.18 | 4.28 |
| TC0202384 | HTR2B          | 3357   | 5-hydroxytryptamine (serotonin) recep      | 0.000999 | 5 | 3.24 | 3.07 | 3.23 | 2.90 | 3.00 | 2.99 | 2.93 | 2.89 |
| TC0300847 | HTR3E          | 285242 | 5-hydroxytryptamine (serotonin) recep      | 0.00033  | 5 | 3.04 | 3.08 | 3.04 | 2.94 | 3.00 | 3.00 | 2.88 | 2.95 |
| TC0500645 | ICHTHYIN       | 348938 | ichthyin protein                           | 0.000834 | 5 | 4.25 | 4.22 | 4.13 | 4.17 | 4.16 | 4.09 | 4.04 | 4.04 |
| TC1500663 | IGF1R          | 3480   | insulin-like growth factor 1 receptor      | 1.43E-05 | 5 | 8.15 | 8.05 | 7.82 | 7.85 | 7.73 | 7.59 | 7.48 | 7.55 |
| TC1101247 | IGSF22         | 283284 | immunoglobulin superfamily, member         | 0.000141 | 5 | 3.86 | 3.83 | 3.84 | 3.74 | 3.73 | 3.72 | 3.74 | 3.78 |
| TC0200534 | IL1R1          | 3554   | interleukin 1 receptor, type I             | 2.76E-11 | 5 | 5.39 | 5.67 | 5.23 | 5.13 | 5.24 | 4.93 | 4.77 | 4.46 |
| TC0300896 | IL1RAP /// Q8N | 3556   | interleukin 1 receptor accessory protei    | 1.02E-11 | 5 | 7.28 | 7.81 | 7.51 | 7.08 | 6.55 | 6.74 | 6.74 | 7.04 |
| TC0500187 | IL31RA         | 133396 | interleukin 31 receptor A /// Interleuki   | 0.000177 | 5 | 2.78 | 2.79 | 2.83 | 2.71 | 2.71 | 2.68 | 2.69 | 2.71 |
| TC1901294 | INSL3 /// JAK3 | 3718   | Janus kinase 3 (a protein tyrosine kinas   | 3.30E-06 | 5 | 5.96 | 6.21 | 6.17 | 6.03 | 6.03 | 5.90 | 5.82 | 5.75 |
| TC0900764 | INSL6          | 11172  | insulin-like 6                             | 0.000334 | 5 | 4.21 | 4.26 | 4.21 | 4.15 | 4.09 | 4.13 | 4.05 | 4.05 |
| TC0202416 | IQCA           | 79781  | IQ motif containing with AAA domain /      | 2.69E-05 | 5 | 3.03 | 2.97 | 3.06 | 2.96 | 2.96 | 2.92 | 2.87 | 2.93 |
| TC0103202 | IRF6           | 3664   | interferon regulatory factor 6             | 0.000235 | 5 | 4.04 | 3.89 | 3.88 | 3.81 | 3.80 | 3.84 | 3.79 | 3.85 |
| TC0100934 | ITGA10         | 8515   | integrin, alpha 10                         | 0.000181 | 5 | 3.65 | 3.56 | 3.63 | 3.50 | 3.53 | 3.52 | 3.51 | 3.50 |
| TC1201279 | ITGA7          | 3679   | integrin, alpha 7 /// Integrin alpha-7 pr  | 0.000165 | 5 | 4.44 | 4.43 | 4.45 | 4.49 | 4.45 | 4.37 | 4.31 | 4.34 |
| TC0102927 | ITLN2          | 142683 | intelectin 2 /// Intelectin-2 precursor (E | 0.000402 | 5 | 3.67 | 3.48 | 3.56 | 3.44 | 3.40 | 3.42 | 3.37 | 3.52 |
| TC1901711 | JOSD2          | 126119 | Josephin domain containing 2               | 0.000172 | 5 | 5.20 | 5.27 | 5.33 | 5.19 | 5.27 | 5.16 | 5.16 | 5.09 |
| TC1800169 | KATNAL2        | 83473  | katanin p60 subunit A-like 2 /// katanir   | 7.38E-05 | 5 | 3.20 | 3.12 | 3.17 | 3.09 | 3.11 | 3.07 | 3.05 | 3.08 |

|           |                         |        |                                               |          |   |      |      |      |      |      |      |      |      |
|-----------|-------------------------|--------|-----------------------------------------------|----------|---|------|------|------|------|------|------|------|------|
| TC1401048 | KCNK10                  | 54207  | potassium channel, subfamily K, memb          | 0.000774 | 5 | 4.02 | 3.96 | 3.91 | 3.83 | 3.90 | 3.88 | 3.81 | 3.83 |
| TC1501264 | KCNN2                   | 3781   | potassium intermediate/small conduct          | 0.000128 | 5 | 4.01 | 3.76 | 3.82 | 3.72 | 3.77 | 3.68 | 3.64 | 3.68 |
| TC1901570 | KCNN4                   | 3783   | potassium intermediate/small conduct          | 0.000544 | 5 | 3.63 | 3.73 | 3.72 | 3.66 | 3.58 | 3.67 | 3.57 | 3.63 |
| TC0400958 | KDR                     | 3791   | kinase insert domain receptor (a type II      | 0.000108 | 5 | 2.70 | 2.61 | 2.61 | 2.53 | 2.60 | 2.50 | 2.54 | 2.55 |
| TC0400063 | KIAA0232                | 9778   | KIAA0232                                      | 2.67E-05 | 5 | 7.04 | 6.88 | 6.60 | 6.55 | 6.50 | 6.57 | 6.60 | 6.64 |
| TC1000316 | KIAA1274                | 27143  | KIAA1274 /// Paladin. [Source:Uniprot/        | 0.000831 | 5 | 4.49 | 4.52 | 4.56 | 4.46 | 4.50 | 4.44 | 4.38 | 4.46 |
| TC1400128 | KIAA1305 /// C          | 57523  | KIAA1305 /// CDNA FLJ11811 fis, clone         | 0.000303 | 5 | 4.00 | 3.88 | 3.92 | 3.81 | 3.87 | 3.82 | 3.73 | 3.84 |
| TC1400458 | KIAA1409                | 57578  | KIAA1409 /// CDNA FLJ43337 fis, clone         | 0.000301 | 5 | 2.64 | 2.65 | 2.71 | 2.63 | 2.61 | 2.61 | 2.58 | 2.61 |
| TC1900871 | KIR3DL1 /// KIF3812 /// |        | killer cell immunoglobulin-like receptor      | 0.000272 | 5 | 4.19 | 4.28 | 4.31 | 4.25 | 4.21 | 4.13 | 4.12 | 4.09 |
| TC1400613 | KLC1                    | 3831   | kinesin light chain 1 /// Kinesin light ch    | 0.000259 | 5 | 6.70 | 6.76 | 6.58 | 6.55 | 6.42 | 6.39 | 6.51 | 6.38 |
| TC0X00397 | KLHL4                   | 56062  | kelch-like 4 (Drosophila)                     | 0.000649 | 5 | 2.76 | 2.80 | 2.80 | 2.69 | 2.69 | 2.70 | 2.67 | 2.69 |
| TC1901729 | KLK10                   | 5655   | kallikrein-related peptidase 10               | 8.33E-05 | 5 | 6.00 | 6.05 | 6.04 | 5.94 | 6.04 | 5.97 | 5.91 | 5.91 |
| TC1901733 | KLK14                   | 43847  | kallikrein-related peptidase 14               | 0.000196 | 5 | 4.51 | 4.55 | 4.60 | 4.50 | 4.44 | 4.46 | 4.37 | 4.46 |
| TC1900752 | KLK2                    | 3817   | kallikrein-related peptidase 2                | 0.000768 | 5 | 4.37 | 4.24 | 4.23 | 4.15 | 4.18 | 4.19 | 4.11 | 4.18 |
| TC1901727 | KLK7                    | 5650   | kallikrein-related peptidase 7 /// Kallikr    | 1.22E-05 | 5 | 3.96 | 3.93 | 3.90 | 3.76 | 3.79 | 3.77 | 3.78 | 3.76 |
| TC1901728 | KLK9 /// KLK8           | 284366 | // kallikrein-related peptidase 9 /// kallikr | 0.000755 | 5 | 4.23 | 4.15 | 4.19 | 4.10 | 4.10 | 4.08 | 4.04 | 4.10 |
| TC1200971 | KLRC1                   | 3821   | killer cell lectin-like receptor subfamily    | 0.000545 | 5 | 2.76 | 2.59 | 2.64 | 2.49 | 2.53 | 2.52 | 2.49 | 2.56 |
| TC0700863 | KRBA1                   | 84626  | KRAB-A domain containing 1 /// KRAB-          | 0.000569 | 5 | 5.00 | 4.95 | 4.95 | 4.85 | 4.90 | 4.87 | 4.83 | 4.88 |
| TC1201232 | KRT2                    | 3849   | keratin 2 (epidermal ichthyosis bullosa       | 2.30E-05 | 5 | 3.49 | 3.34 | 3.33 | 3.28 | 3.32 | 3.24 | 3.19 | 3.29 |
| TC1201238 | KRT78                   | 196374 | keratin 78 /// keratin 5b [Source:RefSeq      | 2.11E-05 | 5 | 3.95 | 3.88 | 3.87 | 3.78 | 3.77 | 3.79 | 3.73 | 3.82 |
| TC1201221 | KRT85                   | 3891   | keratin 85                                    | 0.000166 | 5 | 4.32 | 4.27 | 4.34 | 4.19 | 4.19 | 4.18 | 4.17 | 4.18 |
| TC1701358 | KRT9                    | 3857   | keratin 9 (epidermolytic palmoplantar l       | 0.00075  | 5 | 3.11 | 3.04 | 3.07 | 2.93 | 2.99 | 2.94 | 2.89 | 2.99 |
| TC2100398 | KRTAP10-5               | 386680 | keratin associated protein 10-5 /// Kerat     | 0.00047  | 5 | 5.06 | 4.92 | 4.90 | 4.77 | 4.79 | 4.87 | 4.80 | 4.85 |
| TC1800320 | LAMA1                   | 284217 | laminin, alpha 1 /// Laminin subunit alp      | 2.66E-06 | 5 | 3.31 | 3.33 | 3.33 | 3.27 | 3.25 | 3.23 | 3.22 | 3.27 |
| TC0600715 | LAMA2                   | 3908   | laminin, alpha 2 (merosin, congenital n       | 0.000575 | 5 | 2.69 | 2.65 | 2.66 | 2.60 | 2.58 | 2.61 | 2.57 | 2.61 |
| TC0601537 | LAMA4                   | 3910   | laminin, alpha 4 /// Laminin subunit alp      | 0.000528 | 5 | 2.91 | 2.78 | 2.82 | 2.78 | 2.78 | 2.75 | 2.72 | 2.79 |
| TC0701547 | LAMB1                   | 3912   | laminin, beta 1                               | 1.96E-05 | 5 | 3.58 | 3.51 | 3.53 | 3.46 | 3.47 | 3.45 | 3.45 | 3.41 |
| TC0103199 | LAMB3                   | 3914   | laminin, beta 3                               | 1.30E-13 | 5 | 4.27 | 4.45 | 4.40 | 4.21 | 4.22 | 4.18 | 4.12 | 4.17 |
| TC0101349 | LAMC2                   | 3918   | laminin, gamma 2                              | 0.000963 | 5 | 3.55 | 3.48 | 3.49 | 3.41 | 3.40 | 3.42 | 3.37 | 3.48 |
| TC1100220 | LDHC                    | 3948   | lactate dehydrogenase C                       | 0.000523 | 5 | 2.92 | 2.83 | 2.88 | 2.71 | 2.80 | 2.72 | 2.76 | 2.74 |
| TC0601376 | LMBRD1                  | 55788  | LMBR1 domain containing 1 /// LMBR1           | 1.35E-08 | 5 | 7.45 | 7.32 | 7.57 | 7.22 | 6.88 | 7.22 | 7.21 | 7.47 |
| TC1201025 | LMO3                    | 55885  | LIM domain only 3 (rhombotin-like 2) /        | 0.000473 | 5 | 3.12 | 2.98 | 3.07 | 2.95 | 2.96 | 2.93 | 2.97 | 2.93 |
| TC1201180 | LOC283331               | 283331 | hypothetical protein LOC283331                | 2.05E-07 | 5 | 4.84 | 4.92 | 4.89 | 4.79 | 4.72 | 4.69 | 4.64 | 4.70 |
| TC0301003 | LOC401052               | 401052 | hypothetical LOC401052                        | 0.000258 | 5 | 5.36 | 5.20 | 5.21 | 5.16 | 5.21 | 5.19 | 5.13 | 5.13 |

|           |           |            |                                                                  |          |   |      |      |      |      |      |      |      |      |
|-----------|-----------|------------|------------------------------------------------------------------|----------|---|------|------|------|------|------|------|------|------|
| TC0700872 | LOC643641 | 643641     | hypothetical protein LOC643641                                   | 1.88E-05 | 5 | 4.94 | 4.78 | 4.87 | 4.92 | 4.80 | 4.74 | 4.78 | 4.69 |
| TC0500955 | LOC644010 | 644010     | hypothetical LOC644010                                           | 0.000323 | 5 | 3.92 | 3.51 | 3.80 | 3.53 | 3.45 | 3.53 | 3.61 | 3.40 |
| TC1101604 | LOC645332 | 645332     | hypothetical protein LOC645332                                   | 9.22E-06 | 5 | 4.52 | 4.51 | 4.46 | 4.31 | 4.37 | 4.44 | 4.28 | 4.31 |
| TC0X01407 | LOC648605 | 648605     | /// similar to Trimethyllysine dioxygenase,                      | 0.000828 | 5 | 6.89 | 6.75 | 7.04 | 6.94 | 6.64 | 6.70 | 6.75 | 6.69 |
| TC1100824 | LOC651610 | 651610     | /// similar to Serine-protein kinase ATM (A                      | 1.48E-06 | 5 | 6.53 | 6.71 | 6.30 | 6.11 | 6.16 | 6.11 | 6.05 | 6.15 |
| TC1601228 | LOC652737 | 652737     | similar to hydrocephalus inducing                                | 0.000219 | 5 | 2.83 | 2.76 | 2.87 | 2.73 | 2.72 | 2.75 | 2.68 | 2.74 |
| TC0801169 | LOC730429 | 730429     | /// similar to E3 ubiquitin protein ligase, H                    | 3.24E-06 | 5 | 6.95 | 7.04 | 6.78 | 6.82 | 6.62 | 6.53 | 6.63 | 6.56 |
| TC1200255 | LOC730517 | 730517     | similar to MUC19                                                 | 7.78E-06 | 5 | 3.18 | 3.08 | 3.09 | 3.01 | 3.03 | 3.00 | 3.01 | 3.02 |
| TC0900984 | LOC730908 | 730908     | similar to Aquaporin-7 (AQP-7) (Aquaporin-7)                     | 0.000846 | 5 | 3.59 | 3.51 | 3.60 | 3.50 | 3.50 | 3.45 | 3.46 | 3.50 |
| TC0800802 | LOXL2     | 4017       | lysyl oxidase-like 2                                             | 0.000344 | 5 | 4.21 | 4.18 | 4.20 | 4.14 | 4.12 | 4.13 | 4.04 | 4.11 |
| TC1001206 | LOXL4     | 84171      | lysyl oxidase-like 4                                             | 0.000847 | 5 | 4.73 | 4.68 | 4.66 | 4.61 | 4.64 | 4.62 | 4.55 | 4.57 |
| TC0601730 | LPAL2     | 732058     | /// lipoprotein, Lp(a)-like 2 /// lipoprotein,                   | 2.68E-08 | 5 | 3.42 | 3.26 | 3.31 | 3.23 | 3.21 | 3.19 | 3.17 | 3.22 |
| TC0400260 | LPHN3     | 23284      | latrophilin 3 /// Latrophilin-3 precursor                        | 0.000112 | 5 | 2.42 | 2.42 | 2.48 | 2.36 | 2.41 | 2.36 | 2.31 | 2.37 |
| TC2000271 | LPIN3     | 64900      | lipin 3 /// Lipin-3 (Lipin 3-like). [Source: UniProt]            | 0.000492 | 5 | 4.35 | 4.24 | 4.22 | 4.16 | 4.19 | 4.16 | 4.13 | 4.21 |
| TC1201341 | LRIG3     | 121227     | leucine-rich repeats and immunoglobulin-like domains             | 0.000157 | 5 | 2.56 | 2.63 | 2.59 | 2.51 | 2.51 | 2.53 | 2.50 | 2.53 |
| TC0201973 | LRP1B     | 53353      | low density lipoprotein-related protein 1                        | 7.84E-05 | 5 | 2.58 | 2.47 | 2.52 | 2.45 | 2.45 | 2.42 | 2.41 | 2.46 |
| TC0202080 | LRP2      | 4036       | low density lipoprotein-related protein 2                        | 7.97E-06 | 5 | 2.89 | 2.83 | 2.87 | 2.77 | 2.76 | 2.77 | 2.74 | 2.77 |
| TC1200994 | LRP6      | 4040       | low density lipoprotein receptor-related protein 6               | 1.73E-06 | 5 | 3.02 | 3.04 | 3.16 | 3.03 | 3.04 | 2.95 | 2.94 | 2.96 |
| TC1901057 | LSDP5     | LRG1440503 | /// lipid storage droplet protein 5 /// leucine zipper protein 2 | 3.44E-08 | 5 | 5.82 | 5.96 | 5.78 | 5.80 | 5.77 | 5.69 | 5.58 | 5.57 |
| TC1100239 | LUZP2     | 338645     | leucine zipper protein 2                                         | 0.000758 | 5 | 2.62 | 2.61 | 2.58 | 2.51 | 2.51 | 2.47 | 2.48 | 2.50 |
| TC0800590 | LY6K      | 54742      | lymphocyte antigen 6 complex, locus K                            | 0.000417 | 5 | 3.50 | 3.40 | 3.47 | 3.29 | 3.41 | 3.32 | 3.36 | 3.39 |
| TC0X01359 | MAGEA2    | 4101       | melanoma antigen family A, 2                                     | 5.23E-06 | 5 | 5.47 | 5.37 | 5.35 | 5.26 | 5.22 | 5.29 | 5.20 | 5.27 |
| TC0701374 | MAGI2     | 9863       | membrane associated guanylate kinase 2                           | 2.95E-05 | 5 | 3.12 | 3.02 | 3.02 | 2.93 | 2.95 | 2.92 | 2.93 | 2.96 |
| TC1500632 | MAN2A2    | 4122       | mannosidase, alpha, class 2A, member 2                           | 4.44E-05 | 5 | 6.09 | 5.98 | 5.61 | 5.65 | 5.86 | 5.71 | 5.59 | 5.57 |
| TC1501113 | MAN2C1    | 4123       | mannosidase, alpha, class 2C, member 1                           | 9.52E-05 | 5 | 4.79 | 4.72 | 4.67 | 4.63 | 4.64 | 4.67 | 4.60 | 4.63 |
| TC0500048 | MAR6      | 10299      | membrane-associated ring finger (C3HC1) domain protein 6         | 0.000125 | 5 | 7.44 | 7.30 | 7.20 | 7.11 | 7.08 | 7.17 | 7.10 | 7.07 |
| TC2200619 | MB        | 4151       | myoglobin                                                        | 0.000641 | 5 | 4.20 | 4.05 | 4.09 | 4.00 | 4.02 | 3.99 | 3.94 | 4.05 |
| TC0200776 | MBD5      | 55777      | methyl-CpG binding domain protein 5                              | 5.75E-08 | 5 | 4.97 | 5.27 | 5.31 | 4.90 | 4.77 | 4.98 | 5.05 | 5.11 |
| TC0501215 | MCC       | 4163       | mutated in colorectal cancers                                    | 1.62E-06 | 5 | 4.48 | 4.25 | 4.26 | 4.22 | 4.23 | 4.20 | 4.15 | 4.20 |
| TC0301801 | MCF2L2    | 23101      | MCF.2 cell line derived transforming sequence                    | 2.01E-05 | 5 | 3.01 | 3.07 | 3.03 | 2.95 | 2.95 | 2.94 | 2.92 | 2.96 |
| TC0102393 | MCOLN2    | 255231     | mucolipin 2 /// Mucolipin-2. [Source: UniProt]                   | 0.000913 | 5 | 2.42 | 2.37 | 2.40 | 2.31 | 2.26 | 2.28 | 2.34 | 2.29 |
| TC0100254 | MDS2      | ---        | Myelodysplastic syndrome 2 translocation                         | 9.87E-05 | 5 | 3.96 | 3.78 | 3.81 | 3.77 | 3.77 | 3.71 | 3.69 | 3.76 |
| TC0X00334 | MED12     | 9968       | mediator complex subunit 12 /// Mediator complex subunit 12      | 0.000125 | 5 | 7.04 | 6.92 | 6.88 | 6.84 | 6.73 | 6.58 | 6.65 | 6.56 |
| TC0500443 | MEGF10    | 84466      | multiple EGF-like-domains 10                                     | 8.19E-07 | 5 | 3.36 | 3.26 | 3.29 | 3.19 | 3.19 | 3.19 | 3.18 | 3.20 |



|           |                |        |                                           |          |   |      |      |      |      |      |      |      |      |
|-----------|----------------|--------|-------------------------------------------|----------|---|------|------|------|------|------|------|------|------|
| TC2200323 | MEI1           | 150365 | meiosis inhibitor 1                       | 7.59E-16 | 5 | 3.97 | 4.16 | 4.13 | 4.05 | 3.98 | 3.94 | 3.88 | 3.90 |
| TC0700629 | MET            | 4233   | met proto-oncogene (hepatocyte grow       | 4.31E-06 | 5 | 2.59 | 2.50 | 2.54 | 2.44 | 2.45 | 2.46 | 2.41 | 2.45 |
| TC0601514 | MICAL1         | 64780  | microtubule associated monooxygenase      | 2.82E-10 | 5 | 6.24 | 5.99 | 5.99 | 5.91 | 5.89 | 5.76 | 5.75 | 5.62 |
| TC0301390 | MINA           | 84864  | MYC induced nuclear antigen /// MYC i     | 3.89E-05 | 5 | 4.12 | 4.22 | 4.43 | 4.17 | 4.07 | 4.00 | 4.02 | 4.03 |
| TC0102225 | MKNK1          | 8569   | MAP kinase interacting serine/threonir    | 8.59E-21 | 5 | 6.62 | 7.49 | 7.50 | 6.92 | 6.69 | 6.48 | 6.43 | 6.21 |
| TC1601258 | MLKL           | 197259 | mixed lineage kinase domain-like /// M    | 0.000787 | 5 | 7.41 | 7.68 | 7.69 | 7.61 | 7.29 | 7.19 | 7.34 | 7.27 |
| TC1900453 | MLL4 /// WBP7  | 9757   | myeloid/lymphoid or mixed-lineage leu     | 6.83E-05 | 5 | 5.47 | 5.34 | 5.19 | 5.19 | 5.18 | 5.18 | 5.16 | 5.21 |
| TC1700406 | MLLT6          | 4302   | myeloid/lymphoid or mixed-lineage leu     | 0.000561 | 5 | 5.53 | 5.64 | 5.38 | 5.49 | 5.36 | 5.28 | 5.47 | 5.49 |
| TC1200777 | MLXIP          | 22877  | MLX interacting protein /// MLX intera    | 3.27E-08 | 5 | 5.59 | 5.58 | 5.79 | 5.82 | 5.58 | 5.34 | 5.40 | 5.31 |
| TC1101770 | MMP7           | 4316   | matrix metalloproteinase 7 (matrilysin, i | 0.000448 | 5 | 2.55 | 2.51 | 2.52 | 2.39 | 2.36 | 2.39 | 2.45 | 2.38 |
| TC1101875 | MPZL2          | 10205  | myelin protein zero-like 2                | 6.37E-05 | 5 | 5.10 | 5.14 | 4.84 | 4.53 | 4.52 | 4.97 | 4.83 | 4.98 |
| TC1101874 | MPZL3          | 196264 | myelin protein zero-like 3                | 1.14E-07 | 5 | 8.69 | 9.06 | 8.71 | 8.33 | 8.28 | 8.72 | 8.52 | 8.68 |
| TC1101205 | MRVI1          | 10335  | murine retrovirus integration site 1 hor  | 0.000725 | 5 | 5.20 | 5.25 | 5.32 | 5.15 | 5.09 | 5.21 | 5.13 | 5.17 |
| TC0X00659 | MTMR1          | 8776   | myotubularin related protein 1 /// Myc    | 1.54E-14 | 5 | 5.15 | 5.62 | 5.96 | 5.27 | 4.92 | 5.00 | 5.07 | 5.03 |
| TC2200184 | MTMR3          | 8897   | myotubularin related protein 3            | 0.000453 | 5 | 8.25 | 8.35 | 8.28 | 8.30 | 8.18 | 8.08 | 8.00 | 8.03 |
| TC0800772 | MTMR7          | 9108   | myotubularin related protein 7            | 3.03E-06 | 5 | 3.76 | 3.57 | 3.57 | 3.54 | 3.57 | 3.52 | 3.48 | 3.52 |
| TC0700561 | MUC17          | 140453 | mucin 17, cell surface associated /// mi  | 0.000421 | 5 | 2.95 | 2.87 | 2.94 | 2.83 | 2.84 | 2.84 | 2.76 | 2.84 |
| TC0501525 | MXD3 /// RAB28 | 83463  | MAX dimerization protein 3 /// RAB24,     | 1.29E-07 | 5 | 6.74 | 6.76 | 6.59 | 6.42 | 6.39 | 6.48 | 6.43 | 6.41 |
| TC1200633 | MYBPC1         | 4604   | myosin binding protein C, slow type       | 0.000454 | 5 | 2.75 | 2.79 | 2.83 | 2.76 | 2.76 | 2.72 | 2.69 | 2.73 |
| TC1101347 | MYBPC3         | 4607   | myosin binding protein C, cardiac /// M   | 1.35E-06 | 5 | 5.15 | 5.01 | 4.95 | 4.97 | 4.98 | 4.92 | 4.85 | 4.89 |
| TC1701029 | MYH1           | 4619   | myosin, heavy chain 1, skeletal muscle,   | 0.000616 | 5 | 2.90 | 2.84 | 2.89 | 2.80 | 2.82 | 2.78 | 2.77 | 2.82 |
| TC1701026 | MYH13          | 8735   | myosin, heavy chain 13, skeletal muscl    | 0.000301 | 5 | 3.38 | 3.33 | 3.33 | 3.26 | 3.27 | 3.26 | 3.21 | 3.29 |
| TC0701504 | MYLC2PL        | 93408  | myosin light chain 2, precursor lympho    | 0.000621 | 5 | 4.36 | 4.27 | 4.31 | 4.22 | 4.27 | 4.25 | 4.16 | 4.27 |
| TC1601073 | MYLK3 /// MYL  | 91807  | myosin light chain kinase 3 /// Putative  | 3.02E-05 | 5 | 3.76 | 3.85 | 3.77 | 3.74 | 3.69 | 3.63 | 3.66 | 3.69 |
| TC0800011 | MYOM2          | 9172   | myomesin (M-protein) 2, 165kDa            | 0.00064  | 5 | 3.35 | 3.28 | 3.28 | 3.23 | 3.26 | 3.23 | 3.21 | 3.22 |
| TC0101990 | MYOM3          | 127294 | myomesin family, member 3 /// myom        | 0.000604 | 5 | 3.58 | 3.56 | 3.54 | 3.47 | 3.49 | 3.47 | 3.46 | 3.49 |
| TC0300177 | MYRIP          | 25924  | myosin VIIA and Rab interacting protei    | 6.57E-06 | 5 | 3.84 | 3.74 | 3.74 | 3.64 | 3.65 | 3.64 | 3.59 | 3.65 |
| TC0800902 | MYST3          | 7994   | MYST histone acetyltransferase (monoc     | 1.33E-05 | 5 | 8.16 | 8.35 | 8.14 | 8.00 | 7.83 | 7.95 | 7.95 | 7.95 |
| TC1300625 | NALCN          | 259232 | sodium leak channel, non-selective ///    | 0.000335 | 5 | 2.99 | 2.98 | 3.00 | 2.90 | 2.91 | 2.91 | 2.88 | 2.92 |
| TC0500325 | NBPF22P        | 285622 | neuroblastoma breakpoint family, men      | 0.000656 | 5 | 2.75 | 2.77 | 2.70 | 2.66 | 2.62 | 2.57 | 2.61 | 2.61 |
| TC1700122 | NDEL1          | 81565  | nudE nuclear distribution gene E homo     | 3.18E-08 | 5 | 7.95 | 7.66 | 7.40 | 7.27 | 7.21 | 7.41 | 7.23 | 7.41 |
| TC0400484 | NDST3          | 9348   | N-deacetylase/N-sulfotransferase (hep     | 0.000645 | 5 | 2.43 | 2.45 | 2.56 | 2.42 | 2.45 | 2.40 | 2.36 | 2.43 |
| TC0102357 | NEGR1          | 257194 | neuronal growth regulator 1 /// Neuro     | 6.69E-07 | 5 | 3.43 | 3.59 | 3.43 | 3.33 | 3.36 | 3.44 | 3.37 | 3.37 |
| TC1800541 | NETO1          | 81832  | neuropilin (NRP) and tollid (TLL)-like 1  | 0.000313 | 5 | 2.49 | 2.38 | 2.38 | 2.31 | 2.34 | 2.30 | 2.25 | 2.35 |

|           |               |        |                                           |          |   |       |       |       |       |       |       |       |       |
|-----------|---------------|--------|-------------------------------------------|----------|---|-------|-------|-------|-------|-------|-------|-------|-------|
| TC0101446 | NFASC         | 23114  | neurofascin homolog (chicken) /// Neu     | 0.000574 | 5 | 3.54  | 3.49  | 3.49  | 3.45  | 3.44  | 3.45  | 3.39  | 3.42  |
| TC0X00755 | NLGN4X        | 57502  | neuroligin 4, X-linked /// Neuroigin-4, L | 3.18E-05 | 5 | 3.22  | 3.29  | 3.31  | 3.22  | 3.24  | 3.18  | 3.10  | 3.19  |
| TC1900900 | NLRP8         | 126205 | NLR family, pyrin domain containing 8     | 6.22E-05 | 5 | 3.12  | 3.03  | 2.96  | 2.91  | 2.90  | 2.91  | 2.93  | 2.90  |
| TC1701391 | NM_207388     | ---    | CDNA FLJ31222 fis, clone KIDNE200429      | 5.26E-09 | 5 | 4.73  | 4.60  | 4.69  | 4.56  | 4.62  | 4.53  | 4.39  | 4.35  |
| TC1501043 | NOPE /// NP_0 | 57722  | neighbor of Punc E11 /// neighbor of P    | 1.49E-06 | 5 | 4.42  | 4.38  | 4.41  | 4.33  | 4.32  | 4.31  | 4.24  | 4.28  |
| TC0201814 | NPHP1         | 4867   | nephronophthisis 1 (juvenile) /// Neph    | 0.000746 | 5 | 2.64  | 2.59  | 2.60  | 2.50  | 2.55  | 2.52  | 2.48  | 2.52  |
| TC2000700 | NR_001442.2   | ---    | fer-1-like 4 (C. elegans) (FER1L4) on chr | 3.45E-05 | 5 | 4.01  | 4.02  | 4.02  | 3.91  | 3.94  | 3.93  | 3.89  | 3.94  |
| TC1400550 | NR_003214.1   | ---    | small nucleolar RNA, C/D box 114-21 (S    | 1.80E-05 | 5 | 2.80  | 2.35  | 2.57  | 2.20  | 2.18  | 2.13  | 2.38  | 2.38  |
| TC0900435 | NR4A3         | 8013   | nuclear receptor subfamily 4, group A,    | 0.000128 | 5 | 3.20  | 3.48  | 3.20  | 3.17  | 3.18  | 3.19  | 3.19  | 3.28  |
| TC1001285 | NRAP          | 4892   | nebulin-related anchoring protein /// N   | 3.04E-05 | 5 | 3.31  | 3.28  | 3.26  | 3.20  | 3.22  | 3.18  | 3.17  | 3.22  |
| TC0102252 | NRD1          | 4898   | nardilysin (N-arginine dibasic convertas  | 0.000587 | 5 | 8.56  | 8.49  | 8.59  | 8.50  | 8.37  | 8.40  | 8.35  | 8.30  |
| TC0201507 | NRXN1         | 9378   | neurexin 1 /// Neurexin-1-alpha precur    | 1.12E-09 | 5 | 3.15  | 3.11  | 2.98  | 2.89  | 2.94  | 2.92  | 2.89  | 2.94  |
| TC1400400 | NRXN3         | 9369   | neurexin 3 /// Neurexin-3-alpha precur    | 2.17E-05 | 5 | 2.98  | 2.93  | 2.99  | 2.87  | 2.91  | 2.88  | 2.85  | 2.87  |
| TC1701189 | NUFIP2        | 57532  | nuclear fragile X mental retardation pro  | 2.48E-08 | 5 | 7.82  | 7.92  | 7.61  | 7.60  | 7.41  | 7.57  | 7.63  | 7.63  |
| TC1600967 | NUPR1         | 26471  | nuclear protein 1                         | 0.000393 | 5 | 5.15  | 4.87  | 4.97  | 4.81  | 4.82  | 4.87  | 4.80  | 4.90  |
| TC1900060 | O75863_HUM#   | ---    | Fos39347_1. [Source:Uniprot/SPTREME       | 0.000131 | 5 | 2.89  | 2.50  | 2.51  | 2.45  | 2.43  | 2.23  | 2.37  | 2.47  |
| TC0200945 | OBFC2A        | 64859  | oligonucleotide/oligosaccharide-bindin    | 1.39E-09 | 5 | 9.21  | 9.05  | 9.05  | 8.71  | 8.57  | 8.83  | 8.61  | 8.66  |
| TC1001188 | OPALIN        | 93377  | oligodendrocytic myelin paranodal and     | 7.69E-05 | 5 | 3.91  | 3.81  | 3.80  | 3.69  | 3.75  | 3.81  | 3.70  | 3.73  |
| TC0103457 | OR2T35        | 403244 | olfactory receptor, family 2, subfamily   | 0.000312 | 5 | 3.61  | 3.73  | 3.67  | 3.21  | 3.20  | 3.43  | 3.31  | 3.28  |
| TC1100085 | OR51E1        | 143503 | olfactory receptor, family 51, subfamily  | 0.00011  | 5 | 3.33  | 3.27  | 3.30  | 3.12  | 3.24  | 3.15  | 3.10  | 3.11  |
| TC1901136 | OR7G1         | 125962 | olfactory receptor, family 7, subfamily   | 0.000798 | 5 | 10.73 | 10.58 | 10.58 | 10.52 | 10.57 | 10.57 | 10.43 | 10.55 |
| TC0X00147 | OTC           | 5009   | ornithine carbamoyltransferase            | 0.000318 | 5 | 2.28  | 2.24  | 2.34  | 2.24  | 2.21  | 2.15  | 2.20  | 2.24  |
| TC1600248 | OTOA          | 146183 | otoanchorin /// Otoanchorin precursor. [S | 0.000266 | 5 | 3.23  | 3.21  | 3.23  | 3.13  | 3.14  | 3.16  | 3.14  | 3.16  |
| TC0201375 | OTOF          | 9381   | otoferlin                                 | 5.85E-05 | 5 | 3.82  | 3.87  | 3.87  | 3.81  | 3.82  | 3.79  | 3.71  | 3.80  |
| TC2000091 | OTOR          | 56914  | otoraplin                                 | 0.000781 | 5 | 2.78  | 2.57  | 2.60  | 2.50  | 2.49  | 2.46  | 2.51  | 2.51  |
| TC1500779 | OTUD7A        | 161725 | OTU domain containing 7A                  | 2.56E-05 | 5 | 3.83  | 3.89  | 3.89  | 3.83  | 3.82  | 3.79  | 3.77  | 3.71  |
| TC1101657 | P4HA3         | 283208 | procollagen-proline, 2-oxoglutarate 4-c   | 0.000866 | 5 | 3.74  | 3.72  | 3.65  | 3.64  | 3.60  | 3.59  | 3.58  | 3.64  |
| TC0100195 | PADI1         | 29943  | peptidyl arginine deiminase, type I       | 0.000591 | 5 | 3.88  | 3.81  | 3.84  | 3.73  | 3.77  | 3.72  | 3.67  | 3.73  |
| TC0900510 | PAPPA         | 5069   | pregnancy-associated plasma protein A     | 0.000271 | 5 | 3.67  | 3.60  | 3.61  | 3.55  | 3.57  | 3.54  | 3.48  | 3.52  |
| TC0600404 | PARC /// PARC | 23113  | p53-associated parkin-like cytoplasmic    | 1.81E-07 | 5 | 4.74  | 4.62  | 4.59  | 4.53  | 4.55  | 4.55  | 4.53  | 4.53  |
| TC0601737 | PARK2         | 5071   | Parkinson disease (autosomal recessive    | 0.000244 | 5 | 3.86  | 3.83  | 3.84  | 3.78  | 3.78  | 3.75  | 3.68  | 3.76  |
| TC1101288 | PAX6          | 5080   | paired box 6 /// Paired box protein Pax   | 0.000455 | 5 | 3.26  | 3.31  | 3.34  | 3.26  | 3.28  | 3.24  | 3.18  | 3.28  |
| TC1300256 | PCCA          | 5095   | propionyl Coenzyme A carboxylase, alp     | 0.000249 | 5 | 3.01  | 3.04  | 2.98  | 2.96  | 2.91  | 2.90  | 2.94  | 2.96  |
| TC0500739 | PCDH24        | 54825  | protocadherin 24                          | 0.000474 | 5 | 4.16  | 4.12  | 4.11  | 4.07  | 4.10  | 4.06  | 3.97  | 4.04  |

|           |          |         |                                               |          |          |      |      |      |      |      |      |      |      |
|-----------|----------|---------|-----------------------------------------------|----------|----------|------|------|------|------|------|------|------|------|
| TC0500546 | PCDHB5   | 26167   | protocadherin beta 5                          | 0.000342 | 5        | 2.86 | 2.73 | 3.06 | 2.71 | 2.67 | 2.63 | 2.72 | 2.58 |
| TC0500559 | #####    | 56114   | /// protocadherin gamma subfamily A, 1 /,     | 3.40E-05 | 5        | 2.78 | 2.77 | 2.83 | 2.71 | 2.76 | 2.72 | 2.71 | 2.73 |
| TC0400009 | PCGF3    | 10336   | polycomb group ring finger 3                  | 9.85E-15 | 5        | 5.33 | 5.69 | 5.59 | 5.35 | 5.29 | 5.17 | 5.17 | 5.05 |
| TC2000406 | PCK1     | 5105    | phosphoenolpyruvate carboxykinase 1           | 7.89E-06 | 5        | 3.42 | 3.44 | 3.43 | 3.37 | 3.35 | 3.35 | 3.28 | 3.33 |
| TC0800110 | PCM1     | 5108    | pericentriolar material 1 /// Pericentric     | 1.62E-05 | 5        | 6.48 | 6.84 | 6.36 | 6.16 | 6.15 | 6.25 | 6.54 | 6.44 |
| TC1400337 | PCNX     | 22990   | pecanex homolog (Drosophila) /// Peca         | 4.00E-06 | 5        | 8.02 | 8.32 | 8.11 | 8.11 | 8.02 | 7.94 | 7.79 | 7.77 |
| TC0501159 | PCSK1    | 5122    | proprotein convertase subtilisin/kexin 1      | 0.000221 | 5        | 3.21 | 3.19 | 3.18 | 3.10 | 3.10 | 3.07 | 3.08 | 3.07 |
| TC0301892 | PCYT1A   | 5130    | phosphate cytidyltransferase 1, cholir        | 2.57E-13 | 5        | 7.32 | 7.63 | 7.76 | 7.41 | 7.21 | 7.14 | 6.97 | 6.97 |
| TC1200391 | PDE1B    | 5153    | phosphodiesterase 1B, calmodulin-dep          | 2.34E-05 | 5        | 4.47 | 4.40 | 4.49 | 4.40 | 4.40 | 4.32 | 4.29 | 4.31 |
| TC1901297 | PDE4C    | 5143    | phosphodiesterase 4C, cAMP-specific (l        | 0.000347 | 5        | 4.41 | 4.41 | 4.43 | 4.31 | 4.34 | 4.32 | 4.29 | 4.31 |
| TC1200080 | PEX5     | 5830    | peroxisomal biogenesis factor 5 /// Per       | 1.80E-06 | 5        | 4.15 | 4.26 | 4.24 | 4.12 | 4.08 | 4.15 | 4.10 | 4.07 |
| TC0601255 | PGC      | 5225    | progastricsin (pepsinogen C) /// Gastric      | 0.000426 | 5        | 3.59 | 3.57 | 3.52 | 3.47 | 3.44 | 3.44 | 3.37 | 3.44 |
| TC1700810 | PGS1     | 9489    | phosphatidylglycerophosphate synthas          | 5.53E-12 | 5        | 6.52 | 6.90 | 6.86 | 6.71 | 6.57 | 6.38 | 6.31 | 6.18 |
| TC0X00952 | PHF8     | 731069  | // PHD finger protein 8 /// PHD finger pro    | 2.40E-10 | 5        | 5.68 | 5.98 | 5.80 | 5.62 | 5.52 | 5.56 | 5.54 | 5.53 |
| TC0X00801 | PHKA2    | 5256    | phosphorylase kinase, alpha 2 (liver)         | 2.06E-13 | 5        | 6.13 | 6.00 | 6.28 | 6.14 | 6.00 | 5.79 | 5.74 | 5.67 |
| TC0901353 | PIP5KL1  | 138429  | phosphatidylinositol-4-phosphate 5-kin        | 0.000831 | 5        | 4.59 | 4.67 | 4.62 | 4.60 | 4.64 | 4.63 | 4.50 | 4.51 |
| TC0701195 | PKD1L1   | 168507  | polycystic kidney disease 1 like 1            | 8.61E-06 | 5        | 3.31 | 3.23 | 3.23 | 3.15 | 3.18 | 3.16 | 3.13 | 3.20 |
| TC1601286 | PKD1L2   | /// NP_ | 114780 polycystic kidney disease 1-like 2     | /// pc   | 0.000352 | 5    | 3.93 | 3.90 | 3.92 | 3.83 | 3.83 | 3.83 | 3.85 |
| TC0601326 | PKHD1    | 5314    | polycystic kidney and hepatic disease 1       | 4.07E-06 | 5        | 2.78 | 2.74 | 2.74 | 2.68 | 2.67 | 2.64 | 2.64 | 2.68 |
| TC1501231 | PLIN     | 5346    | perilipin                                     | 0.00041  | 5        | 4.39 | 4.42 | 4.37 | 4.29 | 4.27 | 4.28 | 4.27 | 4.28 |
| TC0100491 | PLK3     | 1263    | polo-like kinase 3 (Drosophila)               | 1.58E-10 | 5        | 5.40 | 5.67 | 5.49 | 5.32 | 5.37 | 5.32 | 5.19 | 5.27 |
| TC0301636 | PLSCR4   | 57088   | phospholipid scramblase 4 /// Phosphc         | 8.73E-06 | 5        | 3.33 | 3.50 | 3.41 | 3.28 | 3.34 | 3.32 | 3.27 | 3.42 |
| TC0X01368 | PNCK     | 139728  | pregnancy up-regulated non-ubiquitou          | 3.25E-05 | 5        | 5.06 | 5.00 | 4.97 | 4.89 | 4.94 | 4.96 | 4.89 | 4.92 |
| TC1000612 | PNLIPRP1 | 5407    | pancreatic lipase-related protein 1 /// l     | 0.000451 | 5        | 3.20 | 3.09 | 3.13 | 3.06 | 3.03 | 3.04 | 2.99 | 3.05 |
| TC0X00678 | PNMA3    | 29944   | paraneoplastic antigen MA3 /// Parane         | 0.000198 | 5        | 5.12 | 5.03 | 4.98 | 4.90 | 4.92 | 4.91 | 4.87 | 4.90 |
| TC0102748 | POGZ     | 23126   | pogo transposable element with ZNF di         | 5.90E-05 | 5        | 6.83 | 7.15 | 6.73 | 6.74 | 6.77 | 6.76 | 6.82 | 6.79 |
| TC1601033 | POL3S    | 339105  | polyserase 3                                  | 2.66E-05 | 5        | 5.21 | 5.04 | 5.03 | 4.98 | 4.98 | 4.99 | 4.94 | 5.01 |
| TC0400772 | POLN     | 353497  | polymerase (DNA directed) nu /// DNA          | 0.000215 | 5        | 3.09 | 2.97 | 3.07 | 3.00 | 2.99 | 2.95 | 2.92 | 3.01 |
| TC0701429 | PON1     | 5444    | paraoxonase 1                                 | 0.000744 | 5        | 2.90 | 2.88 | 2.90 | 2.76 | 2.78 | 2.83 | 2.74 | 2.76 |
| TC0600330 | PPARD    | 5467    | peroxisome proliferator-activated rece        | 3.03E-08 | 5        | 5.66 | 5.55 | 5.28 | 5.31 | 5.21 | 5.29 | 5.28 | 5.35 |
| TC1201420 | PPFIA2   | 8499    | protein tyrosine phosphatase, receptor        | 0.00055  | 5        | 2.57 | 2.53 | 2.57 | 2.49 | 2.50 | 2.45 | 2.47 | 2.53 |
| TC0100058 | PRDM16   | 647868  | // PR domain containing 16 /// PR domair      | 0.000769 | 5        | 4.48 | 4.50 | 4.48 | 4.40 | 4.43 | 4.39 | 4.36 | 4.41 |
| TC0400350 | PRDM8    | 56978   | PR domain containing 8 /// PR domain          | 8.38E-09 | 5        | 4.65 | 4.88 | 4.48 | 4.42 | 4.45 | 4.60 | 4.55 | 4.57 |
| TC2000906 | PRIC285  | /// PR  | 85441 peroxisomal proliferator-activated rece | 3.54E-05 | 5        | 4.97 | 5.06 | 4.89 | 4.86 | 4.83 | 4.88 | 4.85 | 4.95 |

|           |                |        |                                          |          |   |      |      |      |      |      |      |      |      |
|-----------|----------------|--------|------------------------------------------|----------|---|------|------|------|------|------|------|------|------|
| TC1400281 | PRKCH          | 5583   | protein kinase C, eta                    | 0.000418 | 5 | 4.43 | 4.53 | 4.29 | 4.13 | 4.07 | 4.10 | 4.21 | 4.26 |
| TC0500912 | PRLR           | 5618   | prolactin receptor /// Prolactin receptc | 0.000651 | 5 | 2.70 | 2.61 | 2.65 | 2.55 | 2.60 | 2.56 | 2.55 | 2.58 |
| TC1300314 | PSPC1          | 55269  | paraspeckle component 1 /// paraspec     | 8.72E-05 | 5 | 6.44 | 6.51 | 6.65 | 6.51 | 6.41 | 6.26 | 6.36 | 6.20 |
| TC0901023 | PTAR1          | 375743 | protein prenyltransferase alpha subuni   | 0.000122 | 5 | 5.33 | 5.41 | 5.57 | 5.40 | 5.22 | 5.27 | 5.24 | 5.19 |
| TC1000683 | PTPRE          | 5791   | protein tyrosine phosphatase, receptor   | 0.000604 | 5 | 8.18 | 8.13 | 7.87 | 7.96 | 7.92 | 7.98 | 7.83 | 7.90 |
| TC2000749 | PTPRT          | 11122  | protein tyrosine phosphatase, receptor   | 0.000258 | 5 | 4.03 | 4.03 | 4.02 | 3.93 | 3.98 | 3.97 | 3.87 | 3.96 |
| TC0100338 | PTPRU          | 10076  | protein tyrosine phosphatase, receptor   | 0.000892 | 5 | 4.30 | 4.38 | 4.36 | 4.30 | 4.33 | 4.34 | 4.23 | 4.30 |
| TC1200948 | PZP            | 5858   | pregnancy-zone protein /// Pregnancy     | 3.47E-05 | 5 | 3.04 | 2.91 | 2.93 | 2.86 | 2.88 | 2.85 | 2.85 | 2.84 |
| TC0101690 | Q495C9_HUM/--- |        | CDNA FLJ43187 fis, clone FCBBF302344     | 0.000299 | 5 | 4.59 | 4.43 | 4.44 | 4.36 | 4.33 | 4.38 | 4.25 | 4.41 |
| TC0201893 | Q499Y1_HUM/--- |        | ---                                      | 0.000264 | 5 | 2.51 | 2.62 | 2.53 | 2.48 | 2.45 | 2.37 | 2.45 | 2.45 |
| TC0400720 | Q5BLP7_HUM/--- |        | CH41746 (Fragment). [Source:Uniprot/     | 0.000604 | 5 | 2.72 | 2.71 | 2.75 | 2.67 | 2.64 | 2.63 | 2.62 | 2.60 |
| TC1500038 | Q5HYA3_HUM/--- |        | ---                                      | 0.000151 | 5 | 3.10 | 3.00 | 3.03 | 2.94 | 2.97 | 2.95 | 2.95 | 2.96 |
| TC1300123 | Q5SVS6_HUM/--- |        | OTTHUMP00000018350. [Source:Unipr        | 0.000221 | 5 | 4.31 | 4.29 | 4.38 | 4.24 | 4.23 | 4.24 | 4.25 | 4.20 |
| TC0900248 | Q5VV11_HUM/--- |        | Family with sequence similarity 88, me   | 0.000895 | 5 | 3.87 | 3.69 | 3.72 | 3.60 | 3.62 | 3.63 | 3.59 | 3.64 |
| TC0300620 | Q69YT0_HUM/--- |        | ---                                      | 1.41E-05 | 5 | 3.62 | 3.47 | 3.45 | 3.41 | 3.41 | 3.37 | 3.34 | 3.42 |
| TC0701121 | Q6EIF5_HUMA--- |        | AAA1 variant XI. [Source:Uniprot/SPTRI   | 0.000954 | 5 | 2.47 | 2.45 | 2.50 | 2.36 | 2.40 | 2.37 | 2.38 | 2.44 |
| TC1901374 | Q6NUH5_HUM---  |        | ---                                      | 0.000117 | 5 | 3.76 | 3.53 | 3.60 | 3.51 | 3.46 | 3.44 | 3.41 | 3.53 |
| TC0103039 | Q6NWX2_HUM---  |        | ---                                      | 0.000621 | 5 | 3.98 | 4.13 | 3.98 | 3.68 | 3.86 | 3.71 | 3.81 | 3.81 |
| TC2200509 | Q6P575_HUM/--- |        | ---                                      | 0.000524 | 5 | 5.67 | 5.43 | 5.37 | 5.25 | 5.29 | 5.34 | 5.26 | 5.26 |
| TC1600253 | Q6UTX4_HUM/--- |        | CDNA FLJ46765 fis, clone TRACH30245:     | 0.00084  | 5 | 3.05 | 3.03 | 3.05 | 2.96 | 2.99 | 2.97 | 2.96 | 2.98 |
| TC0300241 | Q6UX91_HUM/--- |        | SQFE253. [Source:Uniprot/SPTREMBL;/      | 4.57E-09 | 5 | 6.64 | 6.33 | 6.28 | 6.21 | 6.18 | 5.97 | 5.87 | 5.83 |
| TC0200535 | Q6UXP0_HUM/--- |        | AHPA9419. [Source:Uniprot/SPTREMBL       | 9.76E-05 | 5 | 4.57 | 3.85 | 4.13 | 4.32 | 4.27 | 4.09 | 3.87 | 3.71 |
| TC0200300 | Q6ZNG6_HUM---  |        | CDNA FLJ16124 fis, clone BRACE20116:     | 0.000268 | 5 | 2.59 | 2.55 | 2.55 | 2.46 | 2.52 | 2.49 | 2.46 | 2.49 |
| TC0901120 | Q6ZQV3_HUM/--- |        | CDNA FLJ46870 fis, clone UTERU30125:     | 0.000659 | 5 | 3.40 | 3.30 | 3.31 | 3.17 | 3.11 | 3.17 | 3.21 | 3.22 |
| TC2000447 | Q6ZRC6_HUM/--- |        | CDNA FLJ46471 fis, clone THYMU30233      | 5.56E-05 | 5 | 4.37 | 4.34 | 4.34 | 4.14 | 4.20 | 4.20 | 4.16 | 4.19 |
| TC0800651 | Q6ZRD0_HUM/--- |        | CDNA FLJ46459 fis, clone THYMU30209      | 2.49E-05 | 5 | 5.00 | 4.43 | 4.51 | 4.53 | 4.46 | 4.37 | 4.30 | 4.24 |
| TC2000422 | Q6ZRE1_HUM/--- |        | CDNA FLJ46426 fis, clone THYMU30138      | 2.63E-14 | 5 | 4.20 | 4.52 | 4.22 | 4.03 | 4.04 | 4.07 | 3.96 | 3.87 |
| TC1900189 | Q6ZSN3_HUM/--- |        | CDNA FLJ45351 fis, clone BRHIP301183     | 0.000342 | 5 | 4.76 | 4.73 | 4.65 | 4.74 | 4.70 | 4.62 | 4.63 | 4.58 |
| TC0400807 | Q6ZU05_HUM/--- |        | CDNA FLJ44077 fis, clone TESTI403881:    | 0.000366 | 5 | 5.45 | 5.25 | 5.14 | 5.05 | 4.99 | 5.05 | 5.02 | 4.98 |
| TC0400601 | Q6ZUS2_HUM/--- |        | CDNA FLJ43373 fis, clone NTONG20072      | 2.07E-06 | 5 | 2.81 | 3.01 | 2.95 | 2.83 | 2.84 | 2.76 | 2.75 | 2.71 |
| TC2200550 | Q6ZVA3_HUM/--- |        | CDNA FLJ42830 fis, clone BRCAN20179:     | 4.07E-05 | 5 | 4.72 | 4.57 | 4.73 | 4.78 | 4.64 | 4.45 | 4.44 | 4.18 |
| TC1200098 | Q6ZVH2_HUM/--- |        | CDNA FLJ42583 fis, clone BRACE30090:     | 0.000184 | 5 | 3.12 | 3.80 | 3.44 | 3.34 | 3.09 | 3.12 | 2.99 | 3.10 |
| TC0500840 | Q6ZVT4_HUM/--- |        | CDNA FLJ42124 fis, clone TESTI200947:    | 0.000305 | 5 | 4.31 | 4.11 | 4.10 | 4.04 | 4.03 | 3.98 | 3.94 | 4.07 |
| TC0800154 | Q71JB2_HUMA--- |        | ---                                      | 1.41E-05 | 5 | 9.21 | 9.18 | 9.24 | 9.00 | 8.84 | 8.92 | 8.72 | 8.69 |

|           |            |               |                                            |               |          |      |      |      |      |      |      |      |      |      |
|-----------|------------|---------------|--------------------------------------------|---------------|----------|------|------|------|------|------|------|------|------|------|
| TC1800414 | Q86W11_HUM | ---           | Zinc finger protein. [Source:Uniprot/SP    | 3.98E-07      | 5        | 3.59 | 3.55 | 3.69 | 3.51 | 3.48 | 3.46 | 3.47 | 3.46 |      |
| TC0600629 | Q8N1W0_HUM | ---           | CDNA FLJ37396 fis, clone BRAMY20273        | 1.47E-05      | 5        | 3.24 | 3.12 | 3.18 | 3.06 | 3.05 | 3.03 | 3.04 | 3.09 |      |
| TC0X01403 | Q8N793_HUM | ---           | CDNA FLJ25895 fis, clone CBR03553. [S      | 0.000583      | 5        | 5.71 | 5.62 | 5.93 | 5.65 | 5.50 | 5.75 | 5.77 | 5.56 |      |
| TC1901100 | Q8TCW6_HUM | ---           | ---                                        | 0.000324      | 5        | 3.08 | 2.83 | 2.85 | 2.73 | 2.73 | 2.73 | 2.64 | 2.71 |      |
| TC0900267 | Q8WX68_HUM | ---           | BA251O17.4 (Similar to methylenetetra      | 0.000505      | 5        | 3.53 | 3.67 | 3.65 | 3.53 | 3.54 | 3.46 | 3.50 | 3.55 |      |
| TC1100745 | Q96AU6_HUM | ---           | FAT3 protein (Fragment). [Source:Unip      | 4.50E-05      | 5        | 3.11 | 3.01 | 3.04 | 2.94 | 2.95 | 2.96 | 2.91 | 2.97 |      |
| TC2200508 | Q99919_HUM | ---           | F<lambda>8 protein (Fragment). [Sourc      | 1.90E-09      | 5        | 5.14 | 4.98 | 4.78 | 4.63 | 4.73 | 4.71 | 4.67 | 4.56 |      |
| TC2000762 | Q9BVX4_HUM | ---           | ---                                        | 0.000589      | 5        | 4.06 | 4.07 | 4.01 | 3.90 | 3.94 | 4.06 | 3.97 | 3.98 |      |
| TC2200045 | Q9BYA7_HUM | ---           | ---                                        | 0.000665      | 5        | 4.26 | 4.13 | 4.09 | 3.98 | 4.10 | 4.01 | 3.99 | 4.06 |      |
| TC0301843 | Q9BZK4_HUM | ---           | Ovarian cancer-related protein 2. [Sour    | 0.000379      | 5        | 2.93 | 3.08 | 2.83 | 2.59 | 2.63 | 2.50 | 2.72 | 2.87 |      |
| TC0800804 | Q9P1G9_HUM | ---           | ---                                        | 0.000229      | 5        | 6.58 | 6.17 | 5.79 | 5.82 | 5.63 | 5.75 | 5.57 | 5.64 |      |
| TC0X00492 | Q9P1I9_HUM | ---           | ---                                        | 1.38E-09      | 5        | 7.87 | 8.03 | 7.47 | 7.25 | 6.98 | 7.12 | 7.29 | 7.29 |      |
| TC0101557 | Q9UI51_HUM | ---           | ---                                        | 0.00055       | 5        | 6.79 | 6.57 | 6.39 | 6.21 | 6.20 | 6.39 | 6.31 | 6.24 |      |
| TC1900180 | QTRT1      | /// DNM 81890 | /// queuine tRNA-ribosyltransferase 1 (tRN | 7.94E-05      | 5        | 6.48 | 6.40 | 6.32 | 6.31 | 6.28 | 6.20 | 6.14 | 6.17 |      |
| TC0202245 | RAPH1      | 65059         | Ras association (RalGDS/AF-6) and plec     | 0.000895      | 5        | 3.19 | 3.07 | 3.17 | 3.06 | 3.04 | 3.07 | 3.10 | 3.11 |      |
| TC1201583 | RASAL1     | 8437          | RAS protein activator like 1 (GAP1 like)   | 0.000985      | 5        | 3.87 | 3.94 | 3.90 | 3.85 | 3.87 | 3.86 | 3.76 | 3.81 |      |
| TC0800932 | RB1CC1     | 9821          | RB1-inducible coiled-coil 1                | 0.000496      | 5        | 7.23 | 7.29 | 7.09 | 6.99 | 6.82 | 6.96 | 7.04 | 7.04 |      |
| TC0X00208 | RBM3       | 5935          | RNA binding motif (RNP1, RRM) protei       | 0.000198      | 5        | 4.79 | 5.10 | 4.88 | 4.69 | 4.77 | 4.85 | 4.81 | 4.78 |      |
| TC1101508 | RCOR2      | 283248        | REST corepressor 2                         | 6.25E-05      | 5        | 4.77 | 4.69 | 4.61 | 4.58 | 4.56 | 4.57 | 4.54 | 4.55 |      |
| TC1400317 | RDH12      | 145226        | retinol dehydrogenase 12 (all-trans/9-c    | 6.29E-06      | 5        | 4.09 | 4.00 | 4.00 | 3.91 | 3.92 | 3.99 | 3.81 | 3.94 |      |
| TC1901810 | RDH13      | 112724        | retinol dehydrogenase 13 (all-trans/9-c    | 0.000809      | 5        | 4.65 | 4.55 | 4.59 | 4.51 | 4.54 | 4.54 | 4.46 | 4.51 |      |
| TC1201310 | RDH16      | 8608          | retinol dehydrogenase 16 (all-trans) ///   | 0.000476      | 5        | 3.76 | 3.59 | 3.47 | 3.49 | 3.52 | 3.52 | 3.38 | 3.49 |      |
| TC0102602 | REG4       | 83998         | regenerating islet-derived family, mem     | 0.000964      | 5        | 3.01 | 2.97 | 3.02 | 2.93 | 2.92 | 2.90 | 2.86 | 2.94 |      |
| TC0701525 | RELN       | 5649          | reelin                                     | 5.55E-07      | 5        | 2.83 | 2.77 | 2.83 | 2.69 | 2.70 | 2.71 | 2.70 | 2.71 |      |
| TC2000162 | REM1       | 28954         | RAS (RAD and GEM)-like GTP-binding 1       | 0.000738      | 5        | 4.80 | 4.75 | 4.75 | 4.73 | 4.73 | 4.66 | 4.54 | 4.66 |      |
| TC0201804 | RGPD3      | 653489        | RANBP2-like and GRIP domain containi       | 0.000872      | 5        | 3.87 | 3.84 | 3.80 | 3.65 | 3.63 | 3.67 | 3.78 | 3.71 |      |
| TC1000396 | RGR        | 5995          | retinal G protein coupled receptor ///     | 0.000783      | 5        | 4.44 | 4.33 | 4.33 | 4.26 | 4.25 | 4.31 | 4.27 | 4.23 |      |
| TC1600710 | RGS11      | 8786          | regulator of G-protein signaling 11 ///    | 0.000672      | 5        | 4.61 | 4.61 | 4.64 | 4.60 | 4.66 | 4.57 | 4.48 | 4.58 |      |
| TC1501227 | RHCG       | 51458         | Rh family, C glycoprotein                  | 0.000148      | 5        | 3.48 | 3.30 | 3.35 | 3.29 | 3.30 | 3.26 | 3.22 | 3.31 |      |
| TC1201165 | RHEBL1     | 121268        | Ras homolog enriched in brain like 1       | 0.000743      | 5        | 3.23 | 3.24 | 3.30 | 3.14 | 3.18 | 3.12 | 3.27 | 3.18 |      |
| TC1400746 | RIPK3      | 11035         | receptor-interacting serine-threonine k    | 1.20E-10      | 5        | 5.88 | 5.47 | 5.55 | 5.49 | 5.37 | 5.32 | 5.35 | 5.31 |      |
| TC2100361 | RIPK4      | 54101         | receptor-interacting serine-threonine k    | 3.87E-05      | 5        | 4.16 | 4.26 | 4.16 | 4.17 | 4.13 | 4.13 | 4.04 | 4.09 |      |
| TC1500372 | RNF111     | 54778         | ring finger protein 111 ///                | E3 ubiquitin- | 0.000176 | 5    | 6.72 | 6.92 | 6.88 | 6.84 | 6.63 | 6.70 | 6.69 | 6.75 |
| TC1101203 | RNF141     | 50862         | ring finger protein 141                    | 1.21E-05      | 5        | 8.28 | 8.47 | 8.64 | 8.36 | 8.15 | 8.24 | 8.09 | 8.23 |      |

|           |               |                                                  |          |   |      |      |      |      |      |      |      |      |
|-----------|---------------|--------------------------------------------------|----------|---|------|------|------|------|------|------|------|------|
| TC0201787 | RNF149        | 284996 ring finger protein 149                   | 0.000407 | 5 | 9.42 | 9.65 | 9.52 | 9.42 | 9.29 | 9.50 | 9.42 | 9.49 |
| TC0901262 | RNF183        | 138065 ring finger protein 183                   | 0.000554 | 5 | 3.51 | 3.45 | 3.52 | 3.41 | 3.34 | 3.41 | 3.32 | 3.40 |
| TC0300386 | ROBO2         | 6092 roundabout, axon guidance receptor, h       | 1.47E-06 | 5 | 2.94 | 2.86 | 2.88 | 2.77 | 2.82 | 2.77 | 2.75 | 2.79 |
| TC0601559 | ROS1          | 6098 c-ros oncogene 1, receptor tyrosine kir     | 3.93E-06 | 5 | 2.54 | 2.43 | 2.49 | 2.40 | 2.37 | 2.38 | 2.38 | 2.41 |
| TC2200380 | RP3-402G11.5, | 83642 selenoprotein O /// Selenoprotein O. [S    | 7.73E-07 | 5 | 4.85 | 4.62 | 4.68 | 4.60 | 4.63 | 4.62 | 4.57 | 4.57 |
| TC2000539 | RP5-1022P6.2, | 56261 hypothetical protein KIAA1434 /// Puta     | 2.68E-06 | 5 | 7.84 | 7.53 | 7.44 | 7.18 | 6.97 | 7.18 | 7.14 | 7.02 |
| TC0X01207 | RP6-166C19.1  | 728096 cancer/testis CT47 family, member 1       | 0.000128 | 5 | 6.51 | 6.51 | 6.54 | 6.29 | 6.28 | 6.36 | 6.30 | 6.47 |
| TC0201635 | RTKN          | 6242 rhotekin                                    | 1.47E-05 | 5 | 4.40 | 4.29 | 4.35 | 4.26 | 4.28 | 4.23 | 4.14 | 4.22 |
| TC0201088 | RUFY4         | 285180 RUN and FYVE domain containing 4 ///      | 5.72E-06 | 5 | 4.65 | 4.56 | 4.54 | 4.46 | 4.47 | 4.47 | 4.41 | 4.48 |
| TC1101242 | SAA2          | 6289 serum amyloid A2                            | 0.000257 | 5 | 4.57 | 4.50 | 4.55 | 4.41 | 4.40 | 4.40 | 4.34 | 4.38 |
| TC1900992 | SBNO2         | 22904 strawberry notch homolog 2 (Drosophi       | 0.000547 | 5 | 5.64 | 5.79 | 5.71 | 5.69 | 5.64 | 5.61 | 5.50 | 5.56 |
| TC0301112 | SCN11A        | 11280 sodium channel, voltage-gated, type XI     | 0.00095  | 5 | 2.64 | 2.64 | 2.63 | 2.53 | 2.57 | 2.55 | 2.52 | 2.58 |
| TC1200900 | SCNN1A        | 6337 sodium channel, nonvoltage-gated 1 al       | 0.000537 | 5 | 3.85 | 3.80 | 3.77 | 3.69 | 3.76 | 3.72 | 3.72 | 3.77 |
| TC0600327 | SCUBE3        | 222663 signal peptide, CUB domain, EGF-like 3    | 6.98E-05 | 5 | 4.26 | 4.12 | 4.17 | 4.11 | 4.05 | 4.08 | 4.04 | 4.08 |
| TC0700029 | SDK1          | 221935 sidekick homolog 1, cell adhesion mole    | 1.20E-05 | 5 | 3.81 | 3.87 | 3.88 | 3.81 | 3.82 | 3.79 | 3.72 | 3.74 |
| TC1201309 | SDR-O         | 121214 orphan short-chain dehydrogenase / re     | 0.000224 | 5 | 3.98 | 3.83 | 3.90 | 3.78 | 3.81 | 3.76 | 3.68 | 3.78 |
| TC0701386 | SEMA3E        | 9723 sema domain, immunoglobulin domain          | 1.31E-05 | 5 | 2.22 | 2.15 | 2.25 | 2.13 | 2.15 | 2.09 | 2.07 | 2.07 |
| TC0102739 | SEMA6C        | 10500 sema domain, transmembrane domain          | 0.000652 | 5 | 4.34 | 4.21 | 4.22 | 4.15 | 4.17 | 4.21 | 4.13 | 4.15 |
| TC0500951 | SEPP1         | 6414 selenoprotein P, plasma, 1                  | 0.000637 | 5 | 2.76 | 2.62 | 2.70 | 2.62 | 2.62 | 2.62 | 2.58 | 2.60 |
| TC1401097 | SERPINA9      | 327657 serpin peptidase inhibitor, clade A (alpl | 0.000184 | 5 | 3.45 | 3.31 | 3.35 | 3.23 | 3.31 | 3.23 | 3.19 | 3.27 |
| TC1800236 | SERPINB13     | 5275 serpin peptidase inhibitor, clade B (ova    | 0.000748 | 5 | 2.45 | 2.50 | 2.55 | 2.38 | 2.43 | 2.42 | 2.41 | 2.44 |
| TC1800238 | SERPINB7      | 8710 serpin peptidase inhibitor, clade B (ova    | 0.000401 | 5 | 2.29 | 2.26 | 2.38 | 2.28 | 2.21 | 2.20 | 2.25 | 2.30 |
| TC0300026 | SETD5         | 55209 SET domain containing 5                    | 7.95E-05 | 5 | 6.94 | 6.85 | 6.68 | 6.64 | 6.56 | 6.50 | 6.64 | 6.51 |
| TC1101520 | SF1           | 7536 splicing factor 1 /// Splicing factor 1 (Zi | 2.81E-06 | 5 | 7.71 | 7.57 | 7.29 | 7.32 | 7.36 | 7.34 | 7.31 | 7.25 |
| TC0800897 | SFRP1         | 6422 secreted frizzled-related protein 1 /// S   | 1.99E-05 | 5 | 3.19 | 3.40 | 3.11 | 3.03 | 3.12 | 3.37 | 3.21 | 3.11 |
| TC0800766 | SGCZ          | 137868 sarcoglycan zeta /// Zeta-sarcoglycan (i  | 0.000418 | 5 | 2.79 | 2.61 | 2.66 | 2.59 | 2.59 | 2.53 | 2.51 | 2.52 |
| TC1000318 | SGPL1         | 8879 sphingosine-1-phosphate lyase 1             | 0.000388 | 5 | 6.16 | 6.39 | 6.20 | 6.14 | 5.84 | 6.12 | 6.12 | 6.23 |
| TC1700023 | SGSM2         | 9905 small G protein signaling modulator 2       | 2.06E-06 | 5 | 4.82 | 4.65 | 4.64 | 4.59 | 4.57 | 4.60 | 4.54 | 4.56 |
| TC2200299 | SGSM3         | 27352 small G protein signaling modulator 3 /    | 1.12E-05 | 5 | 4.75 | 4.62 | 4.65 | 4.62 | 4.63 | 4.59 | 4.53 | 4.56 |
| TC1900755 | SIGLEC7       | 27036 sialic acid binding Ig-like lectin 7       | 2.89E-07 | 5 | 6.06 | 5.69 | 5.89 | 5.90 | 5.51 | 5.48 | 5.46 | 5.68 |
| TC0201096 | SLC11A1       | 6556 solute carrier family 11 (proton-couple     | 0.000434 | 5 | 8.16 | 8.09 | 7.96 | 7.92 | 7.85 | 7.67 | 7.45 | 7.51 |
| TC2000333 | SLC12A5       | 57468 solute carrier family 12, (potassium-chl   | 0.000433 | 5 | 3.78 | 3.78 | 3.78 | 3.70 | 3.71 | 3.68 | 3.67 | 3.73 |
| TC0700554 | SLC12A9       | 56996 solute carrier family 12 (potassium/chlc   | 7.50E-09 | 5 | 5.43 | 5.39 | 5.43 | 5.21 | 5.17 | 5.20 | 5.10 | 5.08 |
| TC1101457 | SLC15A3       | 51296 solute carrier family 15, member 3         | 2.59E-05 | 5 | 6.37 | 6.61 | 6.53 | 6.33 | 6.18 | 6.32 | 6.31 | 6.42 |

|           |                |           |                                            |          |   |       |       |       |       |      |       |      |      |
|-----------|----------------|-----------|--------------------------------------------|----------|---|-------|-------|-------|-------|------|-------|------|------|
| TC1100492 | SLC22A9        | 114571    | solute carrier family 22 (organic anion t  | 0.000817 | 5 | 3.04  | 3.10  | 3.06  | 2.97  | 2.95 | 2.95  | 2.93 | 2.97 |
| TC1001212 | SLC25A28       | 81894     | solute carrier family 25, member 28        | 5.48E-07 | 5 | 5.41  | 5.60  | 5.64  | 5.32  | 5.23 | 5.18  | 5.25 | 5.19 |
| TC0800153 | SLC25A37       | 51312     | solute carrier family 25, member 37 ///    | 0.000605 | 5 | 10.29 | 10.12 | 10.15 | 10.10 | 9.96 | 10.02 | 9.95 | 9.89 |
| TC1901088 | SLC25A41       | 284427    | solute carrier family 25, member 41 ///    | 0.000266 | 5 | 4.08  | 4.02  | 4.08  | 3.94  | 3.96 | 3.98  | 3.91 | 4.00 |
| TC0701546 | SLC26A3        | 1811      | solute carrier family 26, member 3 ///     | 0.000542 | 5 | 2.38  | 2.33  | 2.40  | 2.29  | 2.31 | 2.28  | 2.27 | 2.33 |
| TC0301186 | SLC26A6 /// CE | 65010 /// | solute carrier family 26, member 6 ///     | 0.94E-10 | 5 | 4.53  | 4.64  | 4.59  | 4.54  | 4.62 | 4.53  | 4.45 | 4.46 |
| TC0800427 | SLC26A7 /// Q€ | 115111    | solute carrier family 26, member 7 ///     | 0.000354 | 5 | 2.39  | 2.30  | 2.37  | 2.28  | 2.26 | 2.26  | 2.27 | 2.28 |
| TC0500449 | SLC27A6        | 28965     | solute carrier family 27 (fatty acid trans | 8.92E-05 | 5 | 2.96  | 2.84  | 2.93  | 2.84  | 2.84 | 2.80  | 2.78 | 2.83 |
| TC1500589 | SLC28A1        | 9154      | solute carrier family 28 (sodium-couple    | 0.000796 | 5 | 3.75  | 3.74  | 3.80  | 3.68  | 3.69 | 3.66  | 3.65 | 3.72 |
| TC0800514 | SLC30A8        | 169026    | solute carrier family 30 (zinc transporte  | 4.22E-05 | 5 | 2.94  | 2.83  | 2.87  | 2.75  | 2.78 | 2.68  | 2.75 | 2.77 |
| TC1701119 | SLC47A2        | 146802    | solute carrier family 47, member 2 ///     | 0.000938 | 5 | 4.08  | 4.06  | 4.10  | 3.98  | 4.01 | 3.98  | 3.98 | 3.97 |
| TC0200820 | SLC4A10        | 57282     | solute carrier family 4, sodium bicarbor   | 0.000266 | 5 | 2.82  | 2.70  | 2.72  | 2.65  | 2.66 | 2.66  | 2.65 | 2.68 |
| TC0201632 | SLC4A5         | 57835     | solute carrier family 4, sodium bicarbor   | 1.80E-09 | 5 | 3.59  | 3.43  | 3.39  | 3.38  | 3.31 | 3.34  | 3.34 | 3.35 |
| TC0500529 | SLC4A9         | 83697     | solute carrier family 4, sodium bicarbor   | 0.000304 | 5 | 4.23  | 4.20  | 4.19  | 4.11  | 4.12 | 4.13  | 4.12 | 4.10 |
| TC2200608 | SLC5A4         | 6527      | solute carrier family 5 (low affinity gluc | 0.00027  | 5 | 3.30  | 3.27  | 3.28  | 3.14  | 3.18 | 3.19  | 3.16 | 3.22 |
| TC0301744 | SLC7A14        | 57709     | solute carrier family 7 (cationic amino    | 0.000378 | 5 | 3.71  | 3.69  | 3.75  | 3.59  | 3.62 | 3.56  | 3.56 | 3.65 |
| TC0701451 | SMURF1         | 731429 // | SMAD specific E3 ubiquitin protein liga    | 9.26E-05 | 5 | 5.57  | 5.58  | 5.31  | 5.39  | 5.32 | 5.33  | 5.40 | 5.42 |
| TC0300832 | SOX2           | 6657      | SRY (sex determining region Y)-box 2       | 0.000732 | 5 | 3.02  | 2.61  | 2.65  | 2.49  | 2.51 | 2.48  | 2.40 | 2.52 |
| TC2000666 | SPAG4L         | 140732    | sperm associated antigen 4-like /// Spe    | 0.000129 | 5 | 3.66  | 3.60  | 3.67  | 3.55  | 3.53 | 3.55  | 3.57 | 3.60 |
| TC0300324 | SPATA12        | 353324    | spermatogenesis associated 12              | 0.000377 | 5 | 3.23  | 3.20  | 3.34  | 3.20  | 2.99 | 3.17  | 2.95 | 3.16 |
| TC0900125 | SPINK4         | 27290     | serine peptidase inhibitor, Kazal type 4   | 0.000132 | 5 | 4.83  | 4.66  | 4.71  | 4.59  | 4.66 | 4.70  | 4.60 | 4.61 |
| TC0401386 | SPOCK3         | 50859     | sparc/osteonectin, cwcv and kazal-like     | 0.000775 | 5 | 2.55  | 2.44  | 2.43  | 2.38  | 2.39 | 2.34  | 2.31 | 2.35 |
| TC0400381 | SPP1           | 6696      | secreted phosphoprotein 1 (osteopont       | 1.85E-18 | 5 | 3.71  | 5.80  | 3.56  | 3.18  | 3.55 | 3.98  | 3.99 | 4.13 |
| TC1200477 | SRGAP1         | 57522     | SLIT-ROBO Rho GTPase activating prote      | 3.22E-05 | 5 | 3.05  | 2.92  | 2.94  | 2.88  | 2.85 | 2.84  | 2.84 | 2.86 |
| TC1600810 | SRL            | ---       | Sarcalumenin precursor. [Source:Unipr      | 0.000784 | 5 | 3.75  | 3.59  | 3.65  | 3.54  | 3.55 | 3.55  | 3.48 | 3.61 |
| TC0X00252 | SSX2B /// SSX4 | 727837 // | synovial sarcoma, X breakpoint 2B ///      | 0.000981 | 5 | 3.61  | 3.50  | 3.51  | 3.47  | 3.45 | 3.38  | 3.33 | 3.40 |
| TC1501157 | ST20           | 400410    | suppressor of tumorigenicity 20            | 7.30E-05 | 5 | 8.73  | 8.27  | 8.34  | 8.24  | 8.16 | 8.08  | 8.06 | 8.14 |
| TC1300391 | STARD13        | 90627     | StAR-related lipid transfer (START) dom    | 0.000249 | 5 | 2.91  | 3.02  | 3.01  | 2.92  | 2.94 | 2.89  | 2.86 | 2.90 |
| TC0X00313 | STARD8         | 9754      | StAR-related lipid transfer (START) dom    | 0.00064  | 5 | 4.13  | 4.24  | 4.17  | 4.07  | 4.14 | 4.11  | 4.08 | 4.08 |
| TC1500270 | STARD9         | 57519     | StAR-related lipid transfer (START) dom    | 0.000622 | 5 | 3.62  | 3.58  | 3.60  | 3.52  | 3.49 | 3.50  | 3.47 | 3.50 |
| TC1701379 | STAT5B         | 6777      | signal transducer and activator of trans   | 5.77E-06 | 5 | 8.25  | 8.30  | 8.35  | 8.38  | 8.18 | 8.09  | 8.04 | 7.94 |
| TC0501500 | STC2           | 8614      | stanniocalcin 2                            | 0.000793 | 5 | 3.77  | 3.67  | 3.71  | 3.53  | 3.60 | 3.56  | 3.54 | 3.61 |
| TC1300607 | STK24          | 8428      | serine/threonine kinase 24 (STE20 hom      | 0.000128 | 5 | 6.28  | 6.40  | 6.30  | 6.36  | 6.23 | 6.09  | 6.14 | 6.19 |
| TC0500577 | STK32A         | 202374    | serine/threonine kinase 32A /// Serine,    | 0.000632 | 5 | 2.51  | 2.43  | 2.55  | 2.42  | 2.43 | 2.39  | 2.37 | 2.44 |

|           |            |                                                 |          |   |      |      |      |      |      |      |      |      |
|-----------|------------|-------------------------------------------------|----------|---|------|------|------|------|------|------|------|------|
| TC0201104 | STK36      | 27148 serine/threonine kinase 36, fused hom     | 2.29E-06 | 5 | 4.04 | 3.93 | 3.95 | 3.85 | 3.84 | 3.91 | 3.88 | 3.90 |
| TC0301383 | STX19      | 415117 syntaxin 19                              | 0.000986 | 5 | 2.62 | 2.58 | 2.50 | 2.33 | 2.24 | 2.36 | 2.23 | 2.43 |
| TC1900133 | STXBP2     | 6813 syntaxin binding protein 2 /// Syntaxin-   | 3.16E-07 | 5 | 7.00 | 7.08 | 7.16 | 7.16 | 7.12 | 6.84 | 6.80 | 6.73 |
| TC1500637 | SV2B       | 9899 synaptic vesicle glycoprotein 2B           | 0.000314 | 5 | 3.14 | 3.08 | 3.11 | 3.02 | 3.07 | 3.09 | 2.96 | 3.05 |
| TC0100800 | SYPL2      | 284612 synaptophysin-like 2                     | 0.000412 | 5 | 4.32 | 4.43 | 4.43 | 4.30 | 4.30 | 4.27 | 4.27 | 4.28 |
| TC1200537 | SYT1       | 6857 synaptotagmin I                            | 4.19E-05 | 5 | 2.77 | 2.83 | 2.92 | 2.77 | 2.81 | 2.77 | 2.73 | 2.78 |
| TC0600850 | SYTL3      | 94120 synaptotagmin-like 3 /// synaptotagmi     | 6.20E-15 | 5 | 6.89 | 7.60 | 7.05 | 6.54 | 6.44 | 6.62 | 6.48 | 6.55 |
| TC1700318 | TAOK1      | 57551 TAO kinase 1                              | 1.91E-06 | 5 | 7.61 | 7.87 | 7.70 | 7.61 | 7.52 | 7.55 | 7.52 | 7.51 |
| TC0X00701 | TAZ        | 6901 tafazzin (cardiomyopathy, dilated 3A (x    | 2.10E-09 | 5 | 5.41 | 5.51 | 5.47 | 5.33 | 5.47 | 5.37 | 5.27 | 5.20 |
| TC1601007 | TBC1D10B   | 26000 TBC1 domain family, member 10B /// T      | 0.000744 | 5 | 4.52 | 4.59 | 4.48 | 4.49 | 4.46 | 4.45 | 4.37 | 4.41 |
| TC0400065 | TBC1D14    | 57533 TBC1 domain family, member 14             | 2.49E-07 | 5 | 8.57 | 8.83 | 8.81 | 8.68 | 8.46 | 8.44 | 8.35 | 8.35 |
| TC1200483 | TBC1D30    | 23329 TBC1 domain family, member 30             | 5.17E-13 | 5 | 4.04 | 4.19 | 3.67 | 3.61 | 3.43 | 3.59 | 3.58 | 3.75 |
| TC1700868 | TBCD       | 6904 tubulin folding cofactor D /// Tubulin-s   | 3.81E-06 | 5 | 4.90 | 4.97 | 4.92 | 4.84 | 4.86 | 4.87 | 4.82 | 4.82 |
| TC0X00383 | TBX22      | 50945 T-box 22 /// T-box transcription factor`  | 0.000257 | 5 | 2.86 | 2.94 | 2.93 | 2.80 | 2.86 | 2.81 | 2.84 | 2.82 |
| TC0701475 | tcag7.1177 | 352954 opposite strand transcription unit to ST | 0.000754 | 5 | 5.57 | 5.65 | 5.48 | 5.42 | 5.45 | 5.39 | 5.46 | 5.43 |
| TC0101103 | TDRD10     | 126668 tudor domain containing 10 /// Tudor c   | 4.25E-07 | 5 | 3.44 | 3.26 | 3.29 | 3.14 | 3.20 | 3.23 | 3.18 | 3.22 |
| TC0601201 | TEAD3      | 7005 TEA domain family member 3 /// Trans       | 9.40E-05 | 5 | 4.50 | 4.59 | 4.53 | 4.51 | 4.54 | 4.47 | 4.41 | 4.44 |
| TC1701050 | TEKT3      | 64518 tektin 3                                  | 0.000277 | 5 | 2.37 | 2.41 | 2.46 | 2.38 | 2.42 | 2.36 | 2.28 | 2.34 |
| TC1701558 | TEX14      | 56155 testis expressed 14 /// Testis-expressec  | 0.000105 | 5 | 2.92 | 2.91 | 2.95 | 2.84 | 2.85 | 2.83 | 2.81 | 2.83 |
| TC0X01380 | TEX28P1    | 728447 testis expressed 28 pseudogene 1         | 0.000771 | 5 | 3.21 | 3.23 | 3.09 | 3.17 | 3.11 | 3.07 | 3.05 | 3.04 |
| TC2100367 | TFF2       | 7032 trefoil factor 2 (spasmolytic protein 1)   | 0.000942 | 5 | 3.49 | 3.31 | 3.37 | 3.31 | 3.19 | 3.36 | 3.19 | 3.22 |
| TC0800566 | TG         | 7038 thyroglobulin /// Thyroglobulin precurs    | 5.59E-10 | 5 | 4.06 | 3.84 | 3.92 | 4.05 | 4.02 | 3.86 | 3.77 | 3.82 |
| TC1401006 | TGFB3      | 7043 transforming growth factor, beta 3         | 0.000829 | 5 | 4.03 | 4.00 | 4.07 | 3.95 | 3.89 | 3.96 | 3.89 | 3.96 |
| TC0300221 | TGM4       | 7047 transglutaminase 4 (prostate)              | 7.02E-05 | 5 | 3.98 | 3.86 | 3.83 | 3.77 | 3.83 | 3.82 | 3.74 | 3.80 |
| TC1500885 | TGM5       | 9333 transglutaminase 5                         | 0.000407 | 5 | 3.44 | 3.45 | 3.47 | 3.38 | 3.39 | 3.35 | 3.26 | 3.38 |
| TC1501071 | TLE3       | 7090 transducin-like enhancer of split 3 (E(s   | 3.36E-05 | 5 | 8.15 | 8.18 | 7.72 | 7.74 | 7.56 | 7.75 | 7.51 | 7.79 |
| TC1500392 | TLN2       | 83660 talin 2                                   | 6.37E-05 | 5 | 3.63 | 3.61 | 3.60 | 3.54 | 3.55 | 3.53 | 3.49 | 3.54 |
| TC1701534 | TMEM100    | 55273 transmembrane protein 100                 | 0.000103 | 5 | 2.71 | 2.51 | 2.54 | 2.48 | 2.42 | 2.41 | 2.39 | 2.48 |
| TC1700365 | TMEM132E   | 124842 transmembrane protein 132E               | 0.000999 | 5 | 4.69 | 4.66 | 4.61 | 4.56 | 4.54 | 4.55 | 4.46 | 4.56 |
| TC0801262 | TMEM71     | 137835 transmembrane protein 71 /// Transm      | 2.86E-08 | 5 | 8.78 | 8.36 | 8.37 | 8.07 | 7.99 | 8.18 | 8.02 | 8.24 |
| TC1701310 | TNS4       | 84951 tensin 4 /// Tensin-4 precursor (C-term   | 0.000856 | 5 | 4.04 | 4.10 | 4.06 | 3.96 | 4.01 | 4.00 | 3.90 | 3.98 |
| TC1400051 | TOX4       | 9878 TOX high mobility group box family me      | 4.16E-05 | 5 | 7.65 | 7.93 | 7.70 | 7.68 | 7.53 | 7.69 | 7.62 | 7.68 |
| TC1100616 | TPCN2      | 219931 two pore segment channel 2 /// Two-p     | 0.000603 | 5 | 4.88 | 4.87 | 4.74 | 4.72 | 4.74 | 4.78 | 4.76 | 4.73 |
| TC0300893 | TPRG1      | 285386 tumor protein p63 regulated 1            | 8.39E-05 | 5 | 2.95 | 2.89 | 2.93 | 2.87 | 2.84 | 2.76 | 2.69 | 2.85 |



|           |                                                                |                                                 |          |      |      |      |      |      |      |      |      |      |
|-----------|----------------------------------------------------------------|-------------------------------------------------|----------|------|------|------|------|------|------|------|------|------|
| TC0101117 | TRIM46                                                         | 80128 tripartite motif-containing 46 /// Tripar | 0.00013  | 5    | 5.10 | 5.01 | 5.01 | 4.92 | 4.96 | 4.99 | 4.91 | 4.95 |
| TC0700555 | TRIP6                                                          | 7205 thyroid hormone receptor interactor 6      | 0.000877 | 5    | 4.78 | 4.66 | 4.60 | 4.55 | 4.62 | 4.61 | 4.60 | 4.52 |
| TC1500776 | TRPM1                                                          | 4308 transient receptor potential cation cha    | 5.70E-05 | 5    | 3.06 | 3.14 | 3.15 | 3.04 | 3.04 | 3.07 | 3.04 | 3.06 |
| TC1101076 | TRPM5                                                          | 29850 transient receptor potential cation cha   | 0.000754 | 5    | 4.91 | 4.98 | 4.97 | 4.91 | 4.92 | 4.91 | 4.82 | 4.89 |
| TC1700920 | TRPV3                                                          | 162514 transient receptor potential cation cha  | 7.77E-05 | 5    | 3.36 | 3.39 | 3.42 | 3.29 | 3.31 | 3.28 | 3.27 | 3.29 |
| TC1100052 | TSPAN32                                                        | 10077 tetraspanin 32 /// Tetraspanin-32 (Prot   | 0.000853 | 5    | 5.55 | 5.55 | 5.46 | 5.44 | 5.55 | 5.57 | 5.45 | 5.48 |
| TC0202140 | TTN                                                            | 7273 titin /// titin isoform novex-3 [Source:R  | 3.03E-07 | 5    | 3.57 | 3.49 | 3.43 | 3.34 | 3.39 | 3.40 | 3.39 | 3.35 |
| TC0Y00156 | TTY9B                                                          | --- Transcript Y 9A protein. [Source:Uniprc     | 0.000942 | 5    | 2.11 | 2.01 | 2.03 | 1.98 | 1.85 | 1.88 | 1.85 | 1.92 |
| TC2100380 | U2AF1                                                          | 7307 U2 small nuclear RNA auxiliary factor 1    | 0.000751 | 5    | 6.68 | 6.91 | 6.79 | 6.68 | 6.59 | 6.70 | 6.68 | 6.70 |
| TC1100890 | UBE4A                                                          | 9354 ubiquitination factor E4A (UFD2 homol      | 3.67E-06 | 5    | 7.55 | 7.12 | 7.12 | 7.12 | 6.93 | 6.94 | 7.00 | 6.94 |
| TC0500915 | UGT3A2 /// UG167127 // UDP glycosyltransferase 3 family, polyp | 0.000471                                        | 5        | 2.51 | 2.56 | 2.54 | 2.48 | 2.50 | 2.45 | 2.39 | 2.45 |      |
| TC2100149 | UMODL1                                                         | 89766 uromodulin-like 1 /// Uromodulin-like :   | 0.000923 | 5    | 4.06 | 4.03 | 4.02 | 3.96 | 3.98 | 3.96 | 3.92 | 3.97 |
| TC1500633 | UNC45A                                                         | 55898 unc-45 homolog A (C. elegans)             | 0.000183 | 5    | 4.70 | 4.76 | 4.71 | 4.70 | 4.76 | 4.69 | 4.62 | 4.64 |
| TC0103228 | USH2A                                                          | 7399 Usher syndrome 2A (autosomal recessi       | 0.000213 | 5    | 2.56 | 2.53 | 2.56 | 2.48 | 2.50 | 2.45 | 2.46 | 2.51 |
| TC1701580 | USP32                                                          | 84669 ubiquitin specific peptidase 32           | 0.000229 | 5    | 8.92 | 8.67 | 8.55 | 8.54 | 8.40 | 8.48 | 8.48 | 8.49 |
| TC0201546 | USP34                                                          | 9736 ubiquitin specific peptidase 34 /// Ubiq   | 6.49E-06 | 5    | 7.21 | 7.09 | 6.95 | 6.72 | 6.67 | 6.77 | 6.87 | 6.81 |
| TC1100700 | USP35                                                          | 57558 ubiquitin specific peptidase 35           | 0.000174 | 5    | 4.45 | 4.28 | 4.25 | 4.20 | 4.22 | 4.24 | 4.14 | 4.23 |
| TC1700064 | USP6                                                           | 9098 ubiquitin specific peptidase 6 (Tre-2 on   | 0.000273 | 5    | 3.89 | 3.85 | 3.86 | 3.78 | 3.75 | 3.75 | 3.76 | 3.78 |
| TC0X00156 | USP9X                                                          | 8239 ubiquitin specific peptidase 9, X-linked   | 3.47E-06 | 5    | 7.77 | 7.92 | 7.73 | 7.62 | 7.39 | 7.48 | 7.48 | 7.51 |
| TC1000703 | VENTX                                                          | 27287 VENT homeobox homolog (Xenopus lae        | 0.000433 | 5    | 4.18 | 4.36 | 4.29 | 4.12 | 4.11 | 4.10 | 4.06 | 4.13 |
| TC0100133 | VPS13D                                                         | 55187 vacuolar protein sorting 13 homolog D     | 2.81E-05 | 5    | 5.64 | 5.41 | 5.16 | 5.27 | 5.20 | 5.13 | 5.17 | 5.10 |
| TC0700364 | WBSCR17                                                        | 64409 Williams-Beuren syndrome chromosom        | 9.45E-06 | 5    | 3.33 | 3.26 | 3.27 | 3.18 | 3.15 | 3.12 | 3.12 | 3.12 |
| TC0401097 | WDFY3                                                          | 23001 WD repeat and FYVE domain containin       | 6.78E-16 | 5    | 8.14 | 8.77 | 8.69 | 8.31 | 8.16 | 8.13 | 7.94 | 7.85 |
| TC1000229 | WDFY4                                                          | 159491 Uncharacterized protein C10orf64. [Sou   | 2.83E-05 | 5    | 5.93 | 5.61 | 5.65 | 5.51 | 5.38 | 5.44 | 5.34 | 5.33 |
| TC0201339 | WDR35                                                          | 57539 WD repeat domain 35                       | 2.48E-07 | 5    | 3.40 | 3.43 | 3.53 | 3.37 | 3.12 | 3.13 | 3.31 | 3.27 |
| TC2000784 | WFDC10B                                                        | 280664 WAP four-disulfide core domain 10B       | 0.000657 | 5    | 3.75 | 3.80 | 3.91 | 3.68 | 3.80 | 3.71 | 3.65 | 3.71 |
| TC0X00955 | WNK3                                                           | 65267 WNK lysine deficient protein kinase 3 /   | 0.000507 | 5    | 2.52 | 2.49 | 2.52 | 2.45 | 2.49 | 2.41 | 2.41 | 2.42 |
| TC1000511 | WNT8B                                                          | 7479 wntless-type MMTV integration site fa      | 0.000124 | 5    | 3.22 | 3.01 | 3.05 | 2.89 | 2.97 | 3.01 | 2.87 | 2.99 |
| TC1700273 | WSB1                                                           | 26118 WD repeat and SOCS box-containing 1       | 1.35E-13 | 5    | 8.54 | 9.00 | 9.09 | 8.61 | 8.48 | 8.40 | 8.28 | 8.14 |
| TC0X00557 | XPNPEP2                                                        | 7512 X-prolyl aminopeptidase (aminopeptid       | 0.00025  | 5    | 3.91 | 3.92 | 3.91 | 3.80 | 3.84 | 3.83 | 3.77 | 3.83 |
| TC0101329 | XPR1                                                           | 9213 xenotropic and polytropic retrovirus re    | 0.000122 | 5    | 5.70 | 5.97 | 5.55 | 5.66 | 5.58 | 5.71 | 5.77 | 5.76 |
| TC0301464 | ZBTB20                                                         | 26137 zinc finger and BTB domain containing     | 4.73E-10 | 5    | 5.16 | 5.46 | 5.54 | 4.97 | 5.07 | 4.97 | 5.08 | 5.01 |
| TC1900452 | ZBTB32                                                         | 27033 zinc finger and BTB domain containing     | 0.000568 | 5    | 4.78 | 4.58 | 4.72 | 4.62 | 4.57 | 4.48 | 4.47 | 4.56 |
| TC1600861 | ZC3H7A                                                         | 29066 zinc finger CCCH-type containing 7A       | 1.74E-05 | 5    | 6.36 | 6.70 | 6.38 | 6.39 | 6.28 | 6.28 | 6.43 | 6.32 |

|           |               |                                                   |          |   |       |      |      |      |      |      |      |      |
|-----------|---------------|---------------------------------------------------|----------|---|-------|------|------|------|------|------|------|------|
| TC1200534 | ZDHHC17       | 23390 zinc finger, DHHC-type containing 17 //     | 0.000331 | 5 | 6.04  | 6.12 | 6.15 | 6.03 | 6.03 | 5.97 | 5.93 | 5.74 |
| TC0500307 | ZFYVE16       | 9765 zinc finger, FYVE domain containing 16       | 5.68E-06 | 5 | 6.60  | 6.34 | 6.26 | 5.99 | 5.99 | 6.12 | 6.14 | 6.04 |
| TC1300012 | ZMYM2         | 7750 zinc finger, MYM-type 2 /// MYM-type         | 2.84E-05 | 5 | 6.55  | 6.61 | 6.50 | 6.44 | 6.29 | 6.32 | 6.30 | 6.24 |
| TC1900682 | ZNF114        | 163071 zinc finger protein 114                    | 0.000851 | 5 | 3.77  | 3.67 | 3.70 | 3.61 | 3.60 | 3.51 | 3.54 | 3.56 |
| TC0X00677 | ZNF185        | 7739 zinc finger protein 185 (LIM domain) //      | 1.52E-05 | 5 | 5.78  | 5.45 | 5.52 | 5.99 | 5.74 | 5.42 | 5.40 | 5.58 |
| TC1400681 | ZNF219        | 51222 zinc finger protein 219                     | 0.000536 | 5 | 4.33  | 4.11 | 4.13 | 4.22 | 4.18 | 4.03 | 3.98 | 4.07 |
| TC1900607 | ZNF227        | 7770 zinc finger protein 227 /// Zinc finger p    | 4.21E-06 | 5 | 5.26  | 5.38 | 5.36 | 5.08 | 4.93 | 5.17 | 5.38 | 5.43 |
| TC1200855 | ZNF268 /// NM | 10795 zinc finger protein 268 /// zinc finger pi  | 4.91E-05 | 5 | 4.39  | 4.32 | 4.33 | 4.16 | 4.15 | 4.26 | 4.30 | 4.30 |
| TC1600690 | ZNF276        | 92822 zinc finger protein 276                     | 1.49E-08 | 5 | 5.81  | 6.05 | 5.62 | 5.61 | 5.51 | 5.61 | 5.62 | 5.56 |
| TC0202146 | ZNF385B       | 151126 zinc finger protein 385B                   | 0.000885 | 5 | 2.70  | 2.67 | 2.68 | 2.60 | 2.61 | 2.59 | 2.60 | 2.58 |
| TC1800264 | ZNF407 /// NM | 55628 zinc finger protein 407 /// zinc finger pi  | 2.49E-06 | 5 | 6.11  | 6.16 | 6.05 | 5.93 | 5.84 | 5.80 | 5.83 | 5.79 |
| TC1901197 | ZNF44         | 51710 zinc finger protein 44 /// Zinc finger prc  | 2.30E-05 | 5 | 4.50  | 4.37 | 4.40 | 4.32 | 4.26 | 4.23 | 4.29 | 4.32 |
| TC1901199 | ZNF442        | 79973 zinc finger protein 442                     | 0.000326 | 5 | 4.62  | 4.62 | 4.76 | 4.58 | 4.64 | 4.61 | 4.56 | 4.65 |
| TC1900912 | ZNF471        | 57573 zinc finger protein 471                     | 2.10E-05 | 5 | 2.72  | 2.52 | 2.63 | 2.56 | 2.43 | 2.48 | 2.47 | 2.48 |
| TC1900489 | ZNF540        | 163255 zinc finger protein 540 /// Zinc finger p  | 0.000462 | 5 | 2.84  | 2.73 | 2.78 | 2.71 | 2.72 | 2.68 | 2.61 | 2.72 |
| TC1901448 | ZNF585B       | 92285 zinc finger protein 585B                    | 0.000123 | 5 | 4.11  | 4.08 | 4.11 | 3.91 | 3.92 | 3.91 | 4.10 | 4.13 |
| TC0X00893 | ZNF630        | 57232 zinc finger protein 630                     | 0.000866 | 5 | 3.33  | 3.30 | 3.39 | 3.33 | 3.26 | 3.23 | 3.20 | 3.11 |
| TC0900932 | ZNF658B       | 401509 zinc finger protein 658B                   | 1.78E-06 | 5 | 3.25  | 3.22 | 3.24 | 3.14 | 2.99 | 2.85 | 2.93 | 2.89 |
| TC0900925 | ZNF658B       | 401509 zinc finger protein 658B                   | 5.75E-05 | 5 | 3.90  | 3.74 | 3.73 | 3.57 | 3.64 | 3.43 | 3.46 | 3.48 |
| TC0X00195 | ZNF81         | 347344 zinc finger protein 81 /// Zinc finger prc | 1.45E-05 | 5 | 5.06  | 5.08 | 5.11 | 4.98 | 4.81 | 4.93 | 4.95 | 4.93 |
| TC0102208 | ZSWIM5        | 57643 zinc finger, SWIM-type containing 5         | 0.000767 | 5 | 3.46  | 3.34 | 3.29 | 3.28 | 3.29 | 3.23 | 3.20 | 3.29 |
| TC0500203 | ZSWIM6        | 57688 zinc finger, SWIM-type containing 6         | 3.83E-06 | 5 | 7.84  | 8.17 | 8.00 | 8.05 | 7.79 | 7.78 | 7.75 | 7.74 |
| TC1900973 | ---           | ---                                               | 2.61E-14 | 5 | 8.56  | 7.97 | 7.86 | 7.76 | 7.70 | 7.69 | 7.70 | 7.57 |
| TC0201977 | ---           | ---                                               | 3.59E-13 | 5 | 5.94  | 4.82 | 3.90 | 3.28 | 3.53 | 3.53 | 3.85 | 3.51 |
| TC0300954 | ---           | ---                                               | 1.41E-12 | 5 | 10.31 | 9.61 | 9.49 | 9.17 | 9.14 | 9.19 | 9.25 | 9.08 |
| TC0300897 | ---           | ---                                               | 1.44E-12 | 5 | 6.08  | 5.65 | 5.24 | 4.77 | 4.36 | 4.57 | 4.57 | 4.80 |
| TC0300892 | ---           | ---                                               | 5.31E-12 | 5 | 2.21  | 2.63 | 2.41 | 2.16 | 2.15 | 2.21 | 2.11 | 2.18 |
| TC0X01040 | ---           | ---                                               | 6.63E-12 | 5 | 7.60  | 7.22 | 7.06 | 6.83 | 6.66 | 6.62 | 6.60 | 6.53 |
| TC0300838 | ---           | ---                                               | 2.60E-11 | 5 | 3.54  | 4.66 | 4.06 | 3.62 | 3.60 | 3.51 | 3.54 | 3.49 |
| TC0201981 | ---           | ---                                               | 6.10E-11 | 5 | 5.69  | 4.96 | 4.17 | 3.16 | 3.36 | 3.70 | 4.20 | 3.35 |
| TC0300951 | ---           | ---                                               | 2.96E-10 | 5 | 7.42  | 6.68 | 6.71 | 6.43 | 6.31 | 6.39 | 6.37 | 6.30 |
| TC0101470 | ---           | ---                                               | 5.48E-10 | 5 | 8.49  | 9.05 | 8.63 | 8.34 | 8.16 | 7.93 | 7.78 | 7.64 |
| TC1600702 | ---           | ---                                               | 6.46E-10 | 5 | 9.89  | 9.23 | 9.18 | 8.95 | 8.93 | 8.91 | 8.99 | 8.78 |
| TC0103337 | ---           | ---                                               | 1.25E-09 | 5 | 4.62  | 4.77 | 4.89 | 4.73 | 4.57 | 4.40 | 4.28 | 4.40 |

|            |     |          |   |       |       |       |       |       |       |       |       |
|------------|-----|----------|---|-------|-------|-------|-------|-------|-------|-------|-------|
| TC0X01037  | --- | 1.49E-09 | 5 | 5.57  | 5.96  | 5.95  | 5.44  | 5.30  | 5.42  | 5.45  | 5.36  |
| TC0900737  | --- | 2.55E-09 | 5 | 7.37  | 6.97  | 6.80  | 6.53  | 6.45  | 6.53  | 6.30  | 6.24  |
| TC0103255  | --- | 3.22E-09 | 5 | 10.36 | 9.78  | 9.76  | 9.67  | 9.62  | 9.62  | 9.58  | 9.46  |
| TC0101738  | --- | 4.03E-09 | 5 | 8.80  | 8.09  | 8.01  | 7.77  | 7.86  | 7.77  | 7.67  | 7.56  |
| TC1101027  | --- | 5.20E-09 | 5 | 10.61 | 9.74  | 9.75  | 9.46  | 9.56  | 9.45  | 9.40  | 9.38  |
| TC0900856  | --- | 5.62E-09 | 5 | 10.72 | 10.78 | 10.72 | 10.54 | 10.50 | 10.55 | 10.39 | 10.39 |
| TC0300082  | --- | 1.01E-08 | 5 | 6.00  | 5.72  | 5.38  | 5.06  | 5.02  | 5.04  | 5.21  | 4.83  |
| TC0700936  | --- | 1.31E-08 | 5 | 9.47  | 8.83  | 8.90  | 8.62  | 8.65  | 8.60  | 8.60  | 8.48  |
| TC0201982  | --- | 1.61E-08 | 5 | 3.77  | 3.86  | 3.34  | 2.76  | 2.58  | 2.66  | 2.75  | 2.91  |
| TC0101734  | --- | 1.83E-08 | 5 | 10.95 | 10.40 | 10.41 | 10.12 | 10.18 | 10.15 | 10.20 | 9.96  |
| TC1900382  | --- | 2.18E-08 | 5 | 4.37  | 4.73  | 4.77  | 4.53  | 4.86  | 4.10  | 3.70  | 3.74  |
| TC0103410  | --- | 2.72E-08 | 5 | 9.92  | 9.49  | 9.38  | 9.22  | 9.20  | 9.24  | 9.22  | 9.10  |
| TC0103413  | --- | 3.57E-08 | 5 | 8.21  | 7.70  | 7.71  | 7.49  | 7.56  | 7.48  | 7.35  | 7.34  |
| TC17r00020 | --- | 4.91E-08 | 5 | 10.34 | 9.83  | 9.82  | 9.55  | 9.55  | 9.54  | 9.60  | 9.39  |
| TC0X01039  | --- | 8.86E-08 | 5 | 10.44 | 9.30  | 9.15  | 9.00  | 8.87  | 8.86  | 8.89  | 8.63  |
| TC0400489  | --- | 9.12E-08 | 5 | 8.64  | 8.18  | 8.14  | 7.97  | 7.95  | 8.01  | 8.00  | 7.82  |
| TC0401380  | --- | 1.06E-07 | 5 | 5.63  | 5.90  | 5.69  | 5.54  | 5.21  | 5.23  | 5.09  | 5.20  |
| TC1600699  | --- | 1.34E-07 | 5 | 7.79  | 7.52  | 7.53  | 7.29  | 7.17  | 7.23  | 7.09  | 6.97  |
| TC1300406  | --- | 1.68E-07 | 5 | 4.59  | 4.61  | 4.68  | 3.95  | 3.75  | 3.95  | 3.72  | 3.59  |
| TC1901210  | --- | 1.82E-07 | 5 | 3.88  | 3.18  | 3.53  | 3.20  | 3.48  | 3.11  | 2.69  | 2.87  |
| TC1300331  | --- | 2.24E-07 | 5 | 8.62  | 8.55  | 8.76  | 8.63  | 8.62  | 8.50  | 8.39  | 8.35  |
| TC1900381  | --- | 2.29E-07 | 5 | 4.86  | 5.35  | 5.34  | 4.77  | 5.22  | 4.72  | 4.48  | 4.54  |
| TC0200904  | --- | 2.37E-07 | 5 | 5.26  | 5.67  | 5.48  | 5.23  | 5.36  | 5.24  | 5.06  | 4.96  |
| TC0301615  | --- | 3.80E-07 | 5 | 3.83  | 4.48  | 3.84  | 3.73  | 3.77  | 3.65  | 3.50  | 3.60  |
| TC0201978  | --- | 3.94E-07 | 5 | 6.44  | 5.94  | 5.31  | 5.07  | 5.04  | 5.40  | 5.23  | 5.20  |
| TC1500708  | --- | 5.50E-07 | 5 | 2.96  | 3.21  | 3.09  | 2.97  | 2.88  | 2.93  | 2.90  | 2.89  |
| TC0900414  | --- | 7.35E-07 | 5 | 3.55  | 3.48  | 3.39  | 3.30  | 3.35  | 3.37  | 3.35  | 3.34  |
| TC1101020  | --- | 7.92E-07 | 5 | 4.76  | 4.55  | 4.56  | 4.46  | 4.50  | 4.51  | 4.40  | 4.46  |
| TC0501433  | --- | 9.30E-07 | 5 | 10.57 | 10.45 | 10.50 | 10.12 | 10.19 | 10.22 | 10.01 | 9.95  |
| TC0102582  | --- | 9.77E-07 | 5 | 4.58  | 4.54  | 4.19  | 4.04  | 4.04  | 3.98  | 4.05  | 4.10  |
| TC2200161  | --- | 1.43E-06 | 5 | 4.02  | 3.99  | 4.09  | 4.04  | 3.93  | 3.87  | 3.77  | 3.77  |
| TC17r00018 | --- | 1.76E-06 | 5 | 5.58  | 5.27  | 5.29  | 5.08  | 4.96  | 4.88  | 4.88  | 4.83  |
| TC1300647  | --- | 1.77E-06 | 5 | 6.11  | 6.60  | 6.00  | 5.65  | 5.28  | 5.52  | 5.81  | 5.51  |
| TC0103431  | --- | 2.14E-06 | 5 | 7.29  | 6.67  | 6.58  | 6.27  | 6.20  | 6.33  | 6.39  | 6.25  |

|           |     |          |   |       |      |      |      |      |      |      |      |
|-----------|-----|----------|---|-------|------|------|------|------|------|------|------|
| TC0100515 | --- | 2.49E-06 | 5 | 5.40  | 5.42 | 5.54 | 5.37 | 5.17 | 5.27 | 5.19 | 5.13 |
| TC1200518 | --- | 2.98E-06 | 5 | 6.06  | 5.52 | 5.52 | 5.18 | 5.37 | 5.32 | 5.19 | 5.52 |
| TC1701749 | --- | 3.09E-06 | 5 | 3.80  | 3.48 | 3.55 | 3.37 | 3.50 | 3.45 | 3.39 | 3.44 |
| TC0103409 | --- | 3.37E-06 | 5 | 7.70  | 7.12 | 7.11 | 6.90 | 6.93 | 6.84 | 6.96 | 6.80 |
| TC1200074 | --- | 3.61E-06 | 5 | 6.01  | 5.86 | 5.66 | 5.65 | 5.65 | 5.73 | 5.62 | 5.68 |
| TC1101169 | --- | 4.09E-06 | 5 | 3.54  | 3.40 | 3.33 | 3.21 | 3.24 | 3.23 | 3.26 | 3.32 |
| TC0201975 | --- | 4.46E-06 | 5 | 3.23  | 3.35 | 3.29 | 2.71 | 2.79 | 2.81 | 2.77 | 2.84 |
| TC0103142 | --- | 5.06E-06 | 5 | 4.76  | 5.14 | 4.78 | 4.53 | 4.63 | 4.51 | 4.56 | 4.51 |
| TC1501254 | --- | 5.34E-06 | 5 | 4.80  | 4.59 | 4.68 | 4.40 | 4.41 | 4.38 | 4.41 | 4.42 |
| TC1900005 | --- | 6.10E-06 | 5 | 6.04  | 5.71 | 5.79 | 5.63 | 5.64 | 5.58 | 5.62 | 5.65 |
| TC0102955 | --- | 6.17E-06 | 5 | 2.97  | 2.76 | 2.78 | 2.66 | 2.68 | 2.67 | 2.67 | 2.66 |
| TC0102057 | --- | 6.19E-06 | 5 | 3.31  | 3.13 | 3.21 | 2.94 | 2.96 | 3.04 | 2.93 | 3.07 |
| TC0500202 | --- | 7.09E-06 | 5 | 6.80  | 7.09 | 6.86 | 6.93 | 6.70 | 6.64 | 6.63 | 6.58 |
| TC0X00654 | --- | 1.09E-05 | 5 | 4.65  | 4.42 | 4.42 | 4.33 | 4.40 | 4.36 | 4.28 | 4.37 |
| TC1101025 | --- | 1.17E-05 | 5 | 10.13 | 9.78 | 9.71 | 9.53 | 9.58 | 9.56 | 9.61 | 9.47 |
| TC1300652 | --- | 1.19E-05 | 5 | 6.24  | 6.00 | 6.04 | 5.91 | 5.98 | 5.89 | 5.81 | 5.95 |
| TC2200670 | --- | 1.28E-05 | 5 | 4.76  | 5.04 | 4.34 | 4.41 | 4.30 | 4.25 | 4.14 | 4.24 |
| TC0600737 | --- | 1.31E-05 | 5 | 5.71  | 5.23 | 5.31 | 5.07 | 5.25 | 4.99 | 5.03 | 5.13 |
| TC0500616 | --- | 1.41E-05 | 5 | 2.10  | 2.36 | 2.14 | 2.02 | 2.02 | 2.17 | 2.11 | 2.07 |
| TC0200191 | --- | 1.71E-05 | 5 | 2.67  | 2.56 | 2.64 | 2.47 | 2.57 | 2.54 | 2.47 | 2.47 |
| TC0500070 | --- | 1.78E-05 | 5 | 2.56  | 2.38 | 2.47 | 2.35 | 2.33 | 2.30 | 2.22 | 2.26 |
| TC0600027 | --- | 1.78E-05 | 5 | 5.09  | 5.20 | 4.95 | 4.77 | 4.88 | 4.87 | 4.73 | 4.75 |
| TC0100847 | --- | 1.97E-05 | 5 | 6.88  | 6.62 | 6.58 | 6.24 | 6.17 | 6.35 | 6.33 | 6.25 |
| TC0500680 | --- | 2.03E-05 | 5 | 3.61  | 3.56 | 3.58 | 3.47 | 3.47 | 3.45 | 3.43 | 3.51 |
| TC0800946 | --- | 2.04E-05 | 5 | 4.82  | 4.98 | 5.26 | 4.86 | 4.77 | 4.75 | 4.83 | 4.84 |
| TC0500597 | --- | 2.35E-05 | 5 | 3.34  | 3.29 | 3.28 | 3.21 | 3.16 | 3.14 | 3.17 | 3.17 |
| TC1300463 | --- | 2.35E-05 | 5 | 5.85  | 6.24 | 4.94 | 4.63 | 5.00 | 5.58 | 4.94 | 5.45 |
| TC0102096 | --- | 2.37E-05 | 5 | 7.76  | 7.37 | 7.03 | 6.95 | 6.89 | 6.97 | 6.90 | 6.98 |
| TC0300513 | --- | 2.39E-05 | 5 | 4.56  | 4.21 | 4.37 | 4.12 | 4.00 | 4.14 | 4.00 | 4.24 |
| TC1701062 | --- | 2.52E-05 | 5 | 4.17  | 4.56 | 4.31 | 4.25 | 4.17 | 4.00 | 3.84 | 4.11 |
| TC1600962 | --- | 2.60E-05 | 5 | 3.33  | 3.16 | 3.16 | 2.89 | 3.11 | 2.98 | 2.99 | 3.02 |
| TC0401468 | --- | 2.68E-05 | 5 | 3.02  | 2.93 | 2.98 | 2.84 | 2.85 | 2.85 | 2.78 | 2.85 |
| TC0700200 | --- | 2.90E-05 | 5 | 6.58  | 6.28 | 6.31 | 6.20 | 6.21 | 6.23 | 6.21 | 6.14 |
| TC0103073 | --- | 3.02E-05 | 5 | 2.05  | 2.41 | 2.07 | 1.98 | 1.99 | 2.03 | 2.02 | 2.11 |

|            |     |          |   |      |      |      |      |      |      |      |      |
|------------|-----|----------|---|------|------|------|------|------|------|------|------|
| TC1100674  | --- | 3.03E-05 | 5 | 3.42 | 2.95 | 3.18 | 2.80 | 2.79 | 2.94 | 2.85 | 3.02 |
| TC1100170  | --- | 3.03E-05 | 5 | 3.75 | 3.46 | 3.28 | 3.21 | 2.94 | 3.23 | 3.12 | 3.02 |
| TC2100326  | --- | 3.19E-05 | 5 | 3.99 | 3.93 | 3.91 | 3.75 | 3.79 | 3.84 | 3.67 | 3.77 |
| TC0700617  | --- | 3.55E-05 | 5 | 2.82 | 3.23 | 2.71 | 2.68 | 2.79 | 2.77 | 2.96 | 2.79 |
| TC2200010  | --- | 3.59E-05 | 5 | 4.00 | 3.79 | 3.80 | 3.76 | 3.78 | 3.66 | 3.76 | 3.72 |
| TC0X00506  | --- | 4.11E-05 | 5 | 6.31 | 6.33 | 6.25 | 6.04 | 6.14 | 6.18 | 6.03 | 5.91 |
| TC1200940  | --- | 4.26E-05 | 5 | 5.39 | 5.49 | 5.40 | 5.33 | 5.26 | 5.21 | 5.17 | 5.16 |
| TC1600701  | --- | 4.88E-05 | 5 | 9.16 | 8.73 | 8.74 | 8.53 | 8.55 | 8.56 | 8.42 | 8.36 |
| TC0401218  | --- | 5.05E-05 | 5 | 7.30 | 6.95 | 6.81 | 6.71 | 6.71 | 6.75 | 6.71 | 6.66 |
| TC0102461  | --- | 5.13E-05 | 5 | 3.58 | 3.39 | 3.40 | 3.33 | 3.32 | 3.34 | 3.30 | 3.25 |
| TC0401360  | --- | 5.18E-05 | 5 | 3.85 | 3.97 | 4.08 | 4.07 | 3.68 | 3.80 | 3.76 | 3.66 |
| TC1000038  | --- | 5.18E-05 | 5 | 4.80 | 5.17 | 4.58 | 4.55 | 4.57 | 4.53 | 4.25 | 4.12 |
| TC0X01288  | --- | 5.24E-05 | 5 | 3.45 | 3.35 | 3.65 | 3.17 | 3.56 | 3.24 | 3.18 | 3.16 |
| TC1200252  | --- | 5.25E-05 | 5 | 2.88 | 2.86 | 3.11 | 2.90 | 2.84 | 2.81 | 2.82 | 2.83 |
| TC0200761  | --- | 5.38E-05 | 5 | 3.90 | 3.80 | 3.98 | 3.73 | 3.76 | 3.74 | 3.63 | 3.49 |
| TC1901165  | --- | 5.88E-05 | 5 | 7.39 | 6.98 | 6.66 | 6.21 | 6.29 | 6.61 | 6.67 | 6.32 |
| TC0400505  | --- | 5.90E-05 | 5 | 4.05 | 4.32 | 4.59 | 4.15 | 3.74 | 3.80 | 3.68 | 3.84 |
| TC0701795  | --- | 6.24E-05 | 5 | 5.81 | 6.22 | 5.64 | 5.63 | 5.70 | 5.65 | 5.64 | 5.51 |
| TC0500107  | --- | 6.41E-05 | 5 | 2.23 | 2.05 | 2.33 | 2.10 | 1.99 | 1.93 | 1.98 | 2.05 |
| TC0100224  | --- | 6.81E-05 | 5 | 4.38 | 4.50 | 4.29 | 4.13 | 4.05 | 4.31 | 4.20 | 4.46 |
| TC0X01099  | --- | 7.44E-05 | 5 | 7.40 | 7.89 | 7.55 | 7.28 | 7.09 | 7.24 | 7.21 | 7.33 |
| TC0100547  | --- | 8.73E-05 | 5 | 4.55 | 4.34 | 4.37 | 3.97 | 4.17 | 4.12 | 4.09 | 4.18 |
| TC0103253  | --- | 9.63E-05 | 5 | 7.85 | 7.26 | 7.19 | 6.75 | 6.95 | 6.80 | 7.03 | 6.81 |
| TC0200758  | --- | 9.70E-05 | 5 | 2.81 | 2.64 | 2.52 | 2.06 | 2.09 | 2.21 | 2.16 | 2.14 |
| TC05r00001 | --- | 9.76E-05 | 5 | 5.73 | 5.65 | 5.55 | 5.17 | 5.18 | 5.44 | 5.39 | 5.53 |
| TC0300344  | --- | 0.000106 | 5 | 2.80 | 2.62 | 2.67 | 2.60 | 2.56 | 2.59 | 2.60 | 2.56 |
| TC1101868  | --- | 0.000115 | 5 | 4.38 | 4.21 | 4.27 | 4.12 | 4.16 | 4.26 | 4.10 | 4.12 |
| TC1901358  | --- | 0.000118 | 5 | 3.22 | 3.31 | 3.20 | 3.07 | 3.11 | 3.10 | 2.99 | 3.08 |
| TC0300514  | --- | 0.000127 | 5 | 3.42 | 3.24 | 3.48 | 3.07 | 3.14 | 3.00 | 3.06 | 2.98 |
| TC0801278  | --- | 0.000134 | 5 | 6.59 | 7.40 | 6.90 | 5.98 | 5.89 | 6.41 | 6.63 | 6.47 |
| TC0201987  | --- | 0.000138 | 5 | 5.35 | 5.22 | 5.33 | 5.38 | 4.96 | 5.02 | 5.00 | 4.89 |
| TC0400500  | --- | 0.000145 | 5 | 4.73 | 4.76 | 4.64 | 4.50 | 4.28 | 4.36 | 4.25 | 4.23 |
| TC1400786  | --- | 0.00015  | 5 | 5.71 | 6.20 | 5.94 | 5.55 | 5.64 | 5.72 | 5.84 | 5.37 |
| TC0500833  | --- | 0.000152 | 5 | 2.84 | 2.56 | 2.56 | 2.53 | 2.45 | 2.37 | 2.38 | 2.44 |

|           |     |          |   |       |       |       |       |       |       |       |       |
|-----------|-----|----------|---|-------|-------|-------|-------|-------|-------|-------|-------|
| TC0202343 | --- | 0.000157 | 5 | 4.43  | 4.20  | 4.26  | 4.00  | 4.13  | 4.06  | 3.95  | 4.11  |
| TC0600957 | --- | 0.000157 | 5 | 5.24  | 5.08  | 4.85  | 4.81  | 4.77  | 4.91  | 4.80  | 4.89  |
| TC0500796 | --- | 0.000169 | 5 | 6.57  | 6.12  | 6.05  | 5.81  | 5.69  | 5.81  | 5.68  | 5.54  |
| TC0300792 | --- | 0.000171 | 5 | 5.33  | 5.56  | 5.00  | 5.04  | 4.71  | 4.97  | 4.87  | 4.77  |
| TC0500795 | --- | 0.000179 | 5 | 10.82 | 10.48 | 10.55 | 10.26 | 10.29 | 10.42 | 10.36 | 10.32 |
| TC0701734 | --- | 0.000181 | 5 | 8.52  | 8.07  | 8.42  | 8.02  | 8.24  | 7.83  | 7.77  | 7.59  |
| TC2000698 | --- | 0.000183 | 5 | 3.43  | 3.26  | 3.43  | 3.26  | 3.27  | 3.24  | 3.17  | 3.25  |
| TC0201983 | --- | 0.000189 | 5 | 4.75  | 4.67  | 4.30  | 4.20  | 3.94  | 4.10  | 3.91  | 4.00  |
| TC0201992 | --- | 0.000192 | 5 | 3.35  | 3.48  | 3.41  | 3.18  | 3.16  | 3.09  | 3.05  | 3.13  |
| TC0301698 | --- | 0.000205 | 5 | 4.10  | 3.81  | 3.96  | 3.56  | 3.73  | 3.84  | 3.53  | 3.64  |
| TC0900555 | --- | 0.000207 | 5 | 4.68  | 3.99  | 4.27  | 3.83  | 4.02  | 4.00  | 3.89  | 3.94  |
| TC2200625 | --- | 0.000212 | 5 | 4.82  | 4.69  | 4.64  | 4.33  | 4.27  | 4.36  | 4.48  | 4.37  |
| TC1000848 | --- | 0.000213 | 5 | 4.29  | 4.00  | 3.98  | 3.87  | 3.66  | 3.63  | 3.78  | 3.79  |
| TC0501189 | --- | 0.000215 | 5 | 4.91  | 4.64  | 4.54  | 4.48  | 4.48  | 4.29  | 4.40  | 4.35  |
| TC1200538 | --- | 0.00024  | 5 | 2.90  | 2.62  | 2.79  | 2.54  | 2.67  | 2.57  | 2.55  | 2.58  |
| TC1701056 | --- | 0.000254 | 5 | 5.47  | 5.11  | 5.20  | 5.18  | 5.04  | 5.02  | 4.99  | 5.12  |
| TC2000249 | --- | 0.000256 | 5 | 5.33  | 5.11  | 5.15  | 5.10  | 5.12  | 5.10  | 4.96  | 5.08  |
| TC0700852 | --- | 0.000259 | 5 | 4.13  | 3.78  | 3.90  | 3.57  | 3.49  | 3.48  | 3.45  | 3.52  |
| TC0Y00137 | --- | 0.000266 | 5 | 3.34  | 2.82  | 2.96  | 2.90  | 2.69  | 2.67  | 2.53  | 2.91  |
| TC1800435 | --- | 0.000266 | 5 | 3.79  | 3.82  | 3.91  | 3.62  | 3.73  | 3.59  | 3.47  | 3.58  |
| TC0601546 | --- | 0.00027  | 5 | 4.21  | 3.72  | 3.76  | 3.59  | 3.53  | 3.52  | 3.45  | 3.54  |
| TC1700509 | --- | 0.000285 | 5 | 5.85  | 5.87  | 6.04  | 5.70  | 5.60  | 5.78  | 5.79  | 5.80  |
| TC1100062 | --- | 0.000304 | 5 | 4.49  | 4.61  | 4.26  | 4.39  | 4.23  | 4.37  | 4.15  | 4.31  |
| TC0900241 | --- | 0.000304 | 5 | 2.94  | 2.96  | 2.83  | 2.75  | 2.85  | 2.69  | 2.74  | 2.83  |
| TC0500583 | --- | 0.000307 | 5 | 4.83  | 4.09  | 4.52  | 4.19  | 4.16  | 4.23  | 3.98  | 4.32  |
| TC0102078 | --- | 0.00031  | 5 | 4.57  | 4.68  | 4.60  | 4.50  | 4.49  | 4.58  | 4.50  | 4.52  |
| TC0Y00164 | --- | 0.000335 | 5 | 3.43  | 3.32  | 3.33  | 3.20  | 3.23  | 3.26  | 3.22  | 3.27  |
| TC0300517 | --- | 0.000338 | 5 | 4.22  | 3.98  | 4.00  | 3.69  | 3.89  | 3.65  | 3.72  | 3.80  |
| TC0900763 | --- | 0.000338 | 5 | 4.38  | 4.22  | 4.18  | 3.94  | 3.71  | 3.87  | 3.76  | 3.97  |
| TC0500561 | --- | 0.000345 | 5 | 4.82  | 4.75  | 4.36  | 4.30  | 4.28  | 4.37  | 4.36  | 4.29  |
| TC0701682 | --- | 0.000347 | 5 | 5.30  | 4.85  | 5.20  | 4.76  | 4.71  | 4.84  | 4.97  | 4.88  |
| TC1600290 | --- | 0.000352 | 5 | 3.16  | 2.86  | 2.85  | 2.88  | 2.80  | 2.86  | 2.75  | 2.47  |
| TC0301896 | --- | 0.000354 | 5 | 5.08  | 4.74  | 4.54  | 4.54  | 4.17  | 4.38  | 4.38  | 4.41  |
| TC0700813 | --- | 0.000355 | 5 | 6.14  | 5.80  | 5.76  | 5.65  | 5.63  | 5.51  | 5.72  | 5.63  |

|           |        |          |   |       |       |       |       |       |       |       |       |
|-----------|--------|----------|---|-------|-------|-------|-------|-------|-------|-------|-------|
| TC1400440 | ---    | 0.000357 | 5 | 3.46  | 3.30  | 3.21  | 3.09  | 3.07  | 3.06  | 3.02  | 3.21  |
| TC0701224 | ---    | 0.000365 | 5 | 3.76  | 3.84  | 3.82  | 3.41  | 3.31  | 3.48  | 3.13  | 3.32  |
| TC1000559 | ---    | 0.000376 | 5 | 4.54  | 4.32  | 4.43  | 4.28  | 4.23  | 4.28  | 4.12  | 4.27  |
| TC1000985 | ---    | 0.000392 | 5 | 4.64  | 4.44  | 4.48  | 4.38  | 4.31  | 4.42  | 4.35  | 4.33  |
| TC1201240 | ---    | 0.000406 | 5 | 4.65  | 4.46  | 4.50  | 4.38  | 4.38  | 4.44  | 4.38  | 4.47  |
| TC1000371 | ---    | 0.000407 | 5 | 2.96  | 2.86  | 3.08  | 2.86  | 2.98  | 2.92  | 2.74  | 2.71  |
| TC0400646 | ---    | 0.000433 | 5 | 2.72  | 2.53  | 2.71  | 2.60  | 2.54  | 2.56  | 2.62  | 2.48  |
| TC1500818 | ---    | 0.000439 | 5 | 11.42 | 11.17 | 11.21 | 11.11 | 11.15 | 11.15 | 11.02 | 11.13 |
| TC0601494 | ---    | 0.000442 | 5 | 2.73  | 2.73  | 2.73  | 2.60  | 2.68  | 2.63  | 2.59  | 2.61  |
| TC2200333 | ---    | 0.000443 | 5 | 5.44  | 5.28  | 5.33  | 5.21  | 5.28  | 5.29  | 5.21  | 5.27  |
| TC1601174 | ---    | 0.000455 | 5 | 2.23  | 2.16  | 2.18  | 2.01  | 2.25  | 1.99  | 1.93  | 1.97  |
| TC0600866 | ---    | 0.000473 | 5 | 1.83  | 1.82  | 2.14  | 1.78  | 1.86  | 1.87  | 1.73  | 1.91  |
| TC0102842 | ---    | 0.000474 | 5 | 2.79  | 2.40  | 2.53  | 2.46  | 2.30  | 2.19  | 2.27  | 2.41  |
| TC1800227 | ---    | 0.00048  | 5 | 3.73  | 3.57  | 3.69  | 3.54  | 3.47  | 3.54  | 3.34  | 3.50  |
| TC1500664 | ---    | 0.000481 | 5 | 8.38  | 8.18  | 8.09  | 8.04  | 7.75  | 7.79  | 7.83  | 7.71  |
| TC0701801 | ---    | 0.000484 | 5 | 3.84  | 3.37  | 3.61  | 3.35  | 3.33  | 3.29  | 3.24  | 3.34  |
| TC0301687 | ---    | 0.000499 | 5 | 2.69  | 2.40  | 2.57  | 2.52  | 2.28  | 2.35  | 2.23  | 2.23  |
| TC0200532 | ---    | 0.00052  | 5 | 5.75  | 5.67  | 5.64  | 5.45  | 5.18  | 5.05  | 5.29  | 5.38  |
| TC1000410 | 728122 | 0.00052  | 5 | 6.30  | 6.11  | 6.13  | 6.03  | 5.99  | 6.00  | 6.01  | 6.05  |
| TC1700673 | ---    | 0.000522 | 5 | 5.22  | 5.60  | 5.26  | 5.31  | 5.30  | 5.19  | 5.11  | 5.06  |
| TC1600038 | ---    | 0.000534 | 5 | 3.52  | 3.36  | 3.26  | 3.25  | 3.21  | 3.15  | 3.08  | 3.27  |
| TC1000195 | ---    | 0.000547 | 5 | 5.03  | 4.93  | 4.92  | 4.81  | 4.87  | 4.75  | 4.79  | 4.84  |
| TC0102478 | ---    | 0.000549 | 5 | 3.30  | 3.45  | 3.35  | 3.17  | 3.19  | 3.32  | 3.18  | 3.15  |
| TC0301778 | ---    | 0.00055  | 5 | 5.59  | 5.17  | 5.25  | 5.22  | 5.13  | 5.27  | 4.84  | 5.10  |
| TC1101973 | ---    | 0.000553 | 5 | 7.61  | 7.02  | 6.89  | 6.80  | 6.77  | 6.69  | 6.51  | 6.81  |
| TC0101892 | ---    | 0.000572 | 5 | 4.48  | 4.62  | 4.62  | 4.45  | 4.48  | 4.55  | 4.44  | 4.47  |
| TC1100757 | ---    | 0.000577 | 5 | 2.52  | 2.15  | 2.52  | 2.15  | 2.04  | 2.19  | 2.05  | 2.17  |
| TC1001102 | ---    | 0.00058  | 5 | 6.65  | 6.38  | 6.24  | 6.17  | 6.19  | 6.12  | 6.10  | 6.14  |
| TC1201073 | ---    | 0.000591 | 5 | 3.80  | 3.39  | 3.48  | 3.30  | 3.24  | 3.36  | 3.28  | 3.16  |
| TC0400066 | ---    | 0.000597 | 5 | 5.26  | 5.26  | 4.93  | 4.85  | 4.62  | 4.80  | 4.71  | 4.69  |
| TC0400145 | ---    | 0.000606 | 5 | 5.00  | 4.44  | 4.70  | 4.51  | 4.42  | 4.28  | 4.34  | 4.30  |
| TC1101909 | ---    | 0.000616 | 5 | 2.06  | 1.97  | 2.20  | 1.92  | 2.18  | 1.79  | 1.87  | 1.92  |
| TC1201456 | ---    | 0.000621 | 5 | 3.75  | 3.32  | 3.27  | 3.21  | 2.89  | 3.09  | 3.10  | 3.08  |
| TC1800102 | ---    | 0.000639 | 5 | 5.23  | 4.88  | 5.07  | 4.88  | 4.88  | 4.71  | 4.83  | 5.02  |

|           |        |          |   |       |       |       |       |       |       |       |       |
|-----------|--------|----------|---|-------|-------|-------|-------|-------|-------|-------|-------|
| TC1500308 | ---    | 0.000653 | 5 | 3.64  | 3.42  | 3.57  | 3.33  | 3.41  | 3.33  | 3.37  | 3.36  |
| TC0800829 | ---    | 0.000659 | 5 | 5.18  | 4.71  | 4.78  | 4.52  | 4.42  | 4.68  | 4.52  | 4.60  |
| TC1401157 | ---    | 0.000659 | 5 | 8.41  | 8.18  | 8.29  | 7.92  | 7.99  | 7.99  | 8.07  | 8.05  |
| TC0X00632 | ---    | 0.000661 | 5 | 2.35  | 2.18  | 2.08  | 2.04  | 2.05  | 1.86  | 1.99  | 1.98  |
| TC0601364 | 730504 | 0.000664 | 5 | 2.54  | 2.47  | 2.49  | 2.32  | 2.36  | 2.32  | 2.27  | 2.31  |
| TC1000803 | ---    | 0.000666 | 5 | 3.13  | 2.93  | 3.09  | 2.94  | 2.90  | 2.92  | 2.85  | 2.84  |
| TC2100036 | ---    | 0.000682 | 5 | 3.01  | 2.94  | 2.93  | 2.83  | 2.82  | 2.75  | 2.77  | 2.81  |
| TC0400492 | ---    | 0.000682 | 5 | 7.63  | 7.41  | 7.43  | 7.29  | 7.31  | 7.38  | 7.32  | 7.26  |
| TC1900386 | ---    | 0.000684 | 5 | 4.38  | 4.12  | 4.33  | 4.04  | 4.09  | 4.15  | 4.07  | 4.07  |
| TC0100084 | ---    | 0.000688 | 5 | 3.97  | 3.40  | 3.60  | 3.42  | 3.48  | 3.44  | 2.99  | 3.30  |
| TC1400132 | ---    | 0.000699 | 5 | 2.90  | 2.62  | 2.88  | 2.76  | 2.73  | 2.77  | 2.51  | 2.70  |
| TC0102453 | ---    | 0.000699 | 5 | 1.93  | 2.27  | 2.00  | 1.86  | 2.10  | 1.76  | 1.94  | 1.71  |
| TC0X01301 | ---    | 0.000746 | 5 | 3.56  | 3.35  | 3.24  | 3.12  | 3.24  | 3.19  | 3.25  | 3.11  |
| TC0401024 | ---    | 0.000767 | 5 | 2.60  | 2.71  | 2.93  | 2.69  | 2.55  | 2.49  | 2.50  | 2.57  |
| TC0400992 | ---    | 0.000768 | 5 | 2.95  | 2.88  | 2.94  | 2.79  | 2.76  | 2.86  | 2.73  | 2.74  |
| TC0103420 | ---    | 0.000777 | 5 | 3.20  | 3.05  | 3.01  | 2.99  | 3.00  | 2.99  | 2.92  | 2.94  |
| TC0X00853 | ---    | 0.000783 | 5 | 4.95  | 4.97  | 5.02  | 4.80  | 4.79  | 5.00  | 4.83  | 5.00  |
| TC2000592 | ---    | 0.000788 | 5 | 2.95  | 2.83  | 2.85  | 2.74  | 2.78  | 2.73  | 2.73  | 2.79  |
| TC1600385 | ---    | 0.000798 | 5 | 2.74  | 2.63  | 2.69  | 2.53  | 2.42  | 2.51  | 2.52  | 2.58  |
| TC0201843 | ---    | 0.0008   | 5 | 3.11  | 2.56  | 2.80  | 2.76  | 2.57  | 2.49  | 2.45  | 2.62  |
| TC1300282 | ---    | 0.000802 | 5 | 2.77  | 2.29  | 2.30  | 2.25  | 2.40  | 2.15  | 2.05  | 2.08  |
| TC1100814 | ---    | 0.000805 | 5 | 2.79  | 2.61  | 2.52  | 2.40  | 2.47  | 2.46  | 2.34  | 2.52  |
| TC1300531 | ---    | 0.000807 | 5 | 5.23  | 5.25  | 5.32  | 5.16  | 5.03  | 5.14  | 5.13  | 5.05  |
| TC1401144 | ---    | 0.000827 | 5 | 2.79  | 2.45  | 2.59  | 2.40  | 2.49  | 2.39  | 2.38  | 2.43  |
| TC0200795 | ---    | 0.000833 | 5 | 2.30  | 2.24  | 2.14  | 2.06  | 2.04  | 1.77  | 2.01  | 1.89  |
| TC0900926 | ---    | 0.000833 | 5 | 7.08  | 6.48  | 6.34  | 6.38  | 6.34  | 6.00  | 5.93  | 5.87  |
| TC1600788 | ---    | 0.000837 | 5 | 4.86  | 4.66  | 4.63  | 4.52  | 4.62  | 4.52  | 4.49  | 4.64  |
| TC0900222 | ---    | 0.000843 | 5 | 10.86 | 10.54 | 10.57 | 10.45 | 10.54 | 10.50 | 10.36 | 10.44 |
| TC0400930 | ---    | 0.000846 | 5 | 4.35  | 4.21  | 4.24  | 4.00  | 4.18  | 4.06  | 4.12  | 4.18  |
| TC0800719 | ---    | 0.000846 | 5 | 2.98  | 2.81  | 2.79  | 2.70  | 2.65  | 2.55  | 2.63  | 2.83  |
| TC0701266 | ---    | 0.000851 | 5 | 3.55  | 3.46  | 3.56  | 3.45  | 3.47  | 3.44  | 3.47  | 3.55  |
| TC0200647 | ---    | 0.000851 | 5 | 5.06  | 5.08  | 5.39  | 4.58  | 5.39  | 4.90  | 4.44  | 4.91  |
| TC1000242 | ---    | 0.000862 | 5 | 5.71  | 5.45  | 5.69  | 5.75  | 5.58  | 5.55  | 5.59  | 5.54  |
| TC0901043 | ---    | 0.000871 | 5 | 2.02  | 1.82  | 1.80  | 1.84  | 1.81  | 1.68  | 1.67  | 1.87  |



|           |     |          |   |       |       |       |       |       |       |       |       |
|-----------|-----|----------|---|-------|-------|-------|-------|-------|-------|-------|-------|
| TC1800486 | --- | 0.000879 | 5 | 3.61  | 3.63  | 3.43  | 3.29  | 3.07  | 3.27  | 3.02  | 3.22  |
| TC1600780 | --- | 0.000883 | 5 | 4.60  | 4.45  | 4.44  | 4.38  | 4.37  | 4.37  | 4.31  | 4.45  |
| TC0X01044 | --- | 0.000886 | 5 | 7.42  | 7.70  | 7.38  | 7.40  | 7.14  | 7.34  | 7.26  | 7.16  |
| TC0101316 | --- | 0.000886 | 5 | 4.68  | 4.93  | 4.82  | 4.61  | 4.59  | 4.53  | 4.44  | 4.47  |
| TC0300809 | --- | 0.000892 | 5 | 11.28 | 11.11 | 11.19 | 11.07 | 11.12 | 11.13 | 11.08 | 11.04 |
| TC0X00718 | --- | 0.000895 | 5 | 6.62  | 6.50  | 6.86  | 6.74  | 6.23  | 6.42  | 6.69  | 6.54  |
| TC1400009 | --- | 0.000899 | 5 | 2.85  | 2.76  | 2.75  | 2.50  | 2.37  | 2.41  | 2.50  | 2.28  |
| TC0600364 | --- | 0.000899 | 5 | 2.88  | 2.71  | 2.61  | 2.50  | 2.48  | 2.62  | 2.41  | 2.51  |
| TC1201195 | --- | 0.000908 | 5 | 12.42 | 12.24 | 12.22 | 12.19 | 12.27 | 12.19 | 12.09 | 12.17 |
| TC1300128 | --- | 0.000916 | 5 | 3.07  | 2.91  | 3.34  | 2.92  | 2.84  | 2.89  | 2.83  | 3.04  |
| TC0801223 | --- | 0.000926 | 5 | 2.54  | 2.22  | 2.26  | 2.11  | 2.20  | 2.05  | 2.10  | 1.99  |
| TC0102854 | --- | 0.000928 | 5 | 6.06  | 5.57  | 5.69  | 5.41  | 5.40  | 5.38  | 5.45  | 5.43  |
| TC2200132 | --- | 0.000942 | 5 | 4.01  | 4.09  | 4.15  | 3.92  | 3.95  | 3.97  | 3.96  | 4.02  |
| TC1100069 | --- | 0.000948 | 5 | 3.95  | 3.59  | 3.13  | 3.06  | 3.06  | 2.81  | 3.30  | 3.07  |
| TC0700676 | --- | 0.000984 | 5 | 5.52  | 5.11  | 5.20  | 5.10  | 5.13  | 5.00  | 4.90  | 5.03  |
| TC1100205 | --- | 0.000994 | 5 | 4.89  | 4.78  | 4.83  | 4.69  | 4.75  | 4.70  | 4.65  | 4.73  |
| TC2000526 | --- | 0.000997 | 5 | 3.16  | 2.94  | 3.05  | 2.95  | 2.82  | 2.83  | 2.64  | 2.83  |
